# Supplementary material for: PRC2-Mediated Transcriptomic Alterations at the Embryonic Stage Govern Tumorigenesis and Clinical Outcome in MYCN-Driven Neuroblastoma
Source: Oxford University Press journal article supplement (doi:10.1158/0008-5472.can-16-3144), 2017-08-14
Supplement: 00085472can163144-sup-174843_3_supp_4166649_rtr10h.xlsx [file 00085472can163144-sup-174843_3_supp_4166649_rtr10h.xlsx]

## Sheet: 1_arrayCGH
Agilent Genomic Workbench
Genome: mm9
Aberration Algorithm: ADM-2
Threshold: 6.0
Fuzzy Zero: ON
GC Correction: ON
Window Size: 2Kb
Centralization (legacy): OFF
Diploid Peak Centralization: ON
Manually Reassign Peaks: OFF
Combine Replicates (Intra Array): ON
Combine Replicates (Inter Array): OFF
Array Level Filter: NONE
Aberration Filter: ( Minimum Number of Probes for Amplification >= 3 AND Minimum Size (Kb) of Region for Amplification >= 0.0 AND Minimum Avg. Absolute Log Ratio for Amplification >= 0.25 ) OR ( Minimum Number of Probes for Deletion >= 3 AND Minimum Size (Kb) of Region for Deletion >= 0.0 AND Minimum Avg. Absolute Log Ratio for Deletion >= 0.25 )
Feature Level Filter: gIsSaturated = true OR rIsSaturated = true OR gIsFeatNonUnifOL = true OR rIsFeatNonUnifOL = true OR LogRatio = 0
Design Level Filter: Homology = 0 OR IsPseudoautosomal = 1
Genomic Boundary: OFF
Show Flat Intervals: OFF
Aberration call (IntervalBasedReport)
Sample type	No.	Sample name	Chr	Cytoband	Start	Stop	#Probes	Gain/Loss	Logratio	pval	Gene Names
TH-MYCN Hemizygote E13.5 sphere	1	E13.5-26_P3
	2	E13.5-38_P2
	3	E13.5-40_P3
	4	E13.5-42_P2
	5	E13.5-51_P4
	6	E13.5-36_P2	chr1	qD	93946776	93968347	3	Loss	-0.780205	1.147e-10	Hdac4
			chr6	qB3	51844214	51864959	3	Loss	-0.930043	5.133e-13	Skap2
TH-MYCN Hemizygote 3w sphere	1	3w-37_P2
	2	3w-38_P2
	3	3w-40_P2
	4	3w-41_P2
	5	3w-42_P2
	6	3w-43_P2
	7	3w-39_P2	chr7	qA3	26790284	26981899	8	Gain	0.682914	7.826e-12	Cyp2b13, Cyp2b9
			chr13	qD2.3	117137694	117211151	3	Loss	-0.836271	1.703e-10
			chrY	qA1	47507	2546621	117	Gain	0.311141	3.178e-47	Zfy1, Ube1y1, Kdm5d, Eif2s3y, Tspy-ps, Uty, Ddx3y, Usp9y, Zfy2, Gm16501, Sry, Rbmy1a1
	8	3w-44_P2	chr7	qC	70920844	70966975	3	Loss	-1.07584	1.012e-12
			chr8	qC3	90374306	90407821	4	Loss	-1.13966	7.134e-19	Zfp423
			chr10	qB5.3	70440838	70454846	3	Loss	-1.22124	1.455e-16	Bicc1
			chr10	qD2	116427903	116449111	3	Loss	-0.991386	1.609e-11	Best3
TH-MYCN Hemizygote Tumor sphere	1	T-16_P0
	2	T-17_P0
	3	T-18_P0
	4	T-26_P0
	5	T-14_P0	chr3	qA1 - qH4	3073610	159487039	9449	Loss	-0.475322	0	Hnf4g, Zfhx4, Pxmp3, 1700008P02Rik, Pkia, Fam164a, Il7, Stmn2, Hey1, Mrps28, Tpd52, Zbtb10, Zfp704, Pag1, Fabp5, Pmp2, Fabp9, Fabp4, Fabp12, Impa1, Slc10a5, Zfand1, Chmp4c, Snx16, Ralyl, Slc7a12, Lrrcc1, E2f5, 1810022K09Rik, Car13, Car1, Car3, Car2, Gm9733, Sirpb1, Gm5150, Ythdf3, Cypt12, Bhlhe22, Cyp7b1, Armc1, Mtfr1, Pde7a, Dnajc5b, Trim55, Crh, 4632415L05Rik, Cp, Hps3, Hltf, Gyg, Cpa3, Cpb1, A…
	6	T-15_P0	chr13	qC2 - qC3	80695376	81186771	26	Gain	1.08122	3.621e-144	Arrdc3
	7	T-20_P0	chrY	qA1	57466	2635638	119	Gain	2.35218	0	Zfy1, Ube1y1, Kdm5d, Eif2s3y, Tspy-ps, Uty, Ddx3y, Usp9y, Zfy2, Gm16501, Sry, Rbmy1a1
	8	T-25_P0	chr11	qE2	118028703	118377030	36	Gain	0.835747	3.032e-121	Cyth1, Usp36, Timp2, Ddc8, Lgals3bp, Cant1, C1qtnf1, Engase, D11Bwg0517e
			chr16	qA1	5538529	6947712	120	Gain	0.894898	0	A2bp1
			chr16	qB4	41615995	41803372	20	Gain	0.725687	5.702e-49	Lsamp
TH-MYCN Hemyzygote Tumor tissue	1	#1789
	2	#1812
	3	#1823
	4	#1878
	5	#1893
	6	#1284	chr9	qA1 - qF4	3264269	123943394	2448	Loss	-0.305737	0	Alkbh8, Cwf19l2, Gucy1a2, Aasdhppt, Kbtbd3, 8430410K20Rik, Gria4, Casp1, Casp4, Casp12, Pdgfd, Ddi1, Dync2h1, Dcun1d5, Mmp13, Mmp12, Mmp1b, Mmp3, Mmp1a, Mmp10, Mmp8, Mmp27, Mmp20, Mmp7, Tmem123, Birc2, Birc3, Yap1, 9230110C19Rik, AK129341, Trpc6, Pgr, 9030420J04Rik, Cntn5, Phxr4, Maml2, Mtmr2, Cep57, Fam76b, Sesn3, Endod1, Kdm4d, Cwc15, Amotl1, Piwil4, Fut4, 1700012B09Rik, Ankrd49, Mre11a, EG4343…
	7	#1334	chr18	qE4	85251289	87919170	9	Gain	0.622873	3.597e-19	Neto1, Cbln2
	8	#1347	chr3	qA1 - qH4	3460322	159508598	2162	Gain	0.398627	0	Hnf4g, Zfhx4, Pxmp3, 1700008P02Rik, Pkia, Fam164a, Il7, Stmn2, Hey1, Mrps28, Tpd52, Zbtb10, Zfp704, Pag1, Fabp5, Pmp2, Fabp9, Fabp4, Fabp12, Impa1, Slc10a5, Zfand1, Chmp4c, Snx16, Ralyl, Slc7a12, Lrrcc1, E2f5, 1810022K09Rik, Car13, Car1, Car3, Car2, Gm9733, Sirpb1, Gm5150, Ythdf3, Cypt12, Bhlhe22, Cyp7b1, Armc1, Mtfr1, Pde7a, Dnajc5b, Trim55, Crh, 4632415L05Rik, Cp, Hps3, Hltf, Gyg, Cpa3, Cpb1, A…
	9	#1868	chr16	qA1 - qC4	3593026	98172625	1463	Loss	-0.362368	0	Olfr161, Mefv, Zfp263, Olfr15, Zfp174, Zfp597, Nat15, 1700037C18Rik, Cluap1, Nlrc3, Btbd12, Dnase1, Trap1, Crebbp, Gm5766, Adcy9, Srl, Tcfap4, Glis2, Magmas, Coro7, Vasn, Dnaja3, Nmral1, Hmox2, 5730403B10Rik, 4930562C15Rik, Fam100a, Mgrn1, Nudt16l1, Anks3, Sept12, Rogdi, 3930401K13Rik, Ubn1, Ppl, Sec14l5, Nagpa, AU021092, Alg1, Fam86, A2bp1, Tmem114, BC024814, Abat, Tmem186, Pmm2, Carhsp1, Usp7, …
	10	#1813	chr1	qC1.3	58977946	59290579	15	Loss	-0.695589	3.238e-17	Trak2, Stradb, Als2cr11, Als2cr4, Mpp4, Als2
			chr7	qE3	111052179	111076893	3	Loss	-1.02854	3.756e-10	Olfr65, Olfr631
			chr18	qE1	63756169	63831334	3	Loss	-1.16753	1.391e-12	Txnl1
	11	#1333	chr5	qA1 - qG3	3279641	152450894	2604	Loss	-0.334784	0	Cdk6, 5830415L20Rik, 1700109H08Rik, C030048B08Rik, Pex1, Gatad1, 4930511M11Rik, Ankib1, Krit1, 4932412H11Rik, Mterf, Akap9, Cyp51, Gm9897, Fzd1, Pftk1, Cldn12, Gtpbp10, A330021E22Rik, Steap2, Steap1, Zfp804b, 4921511H03Rik, Steap4, Sri, Adam22, Dbf4, Slc25a40, Rundc3b, Abcb1a, Abcb1b, Abcb4, Crot, 4930420K17Rik, Dmtf1, 9330182L06Rik, Grm3, Gm6455, Speer1-ps1, Gm6460, Sema3d, Sema3a, Speer3, Sema3…
			chr6	qA1 - qG3	3274714	149461923	2392	Loss	-0.344705	0	Samd9l, Hepacam2, Ccdc132, Calcr, Tfpi2, Gngt1, Gng11, Bet1, Col1a2, Casd1, Sgce, Peg10, Ppp1r9a, Pon1, Pon3, Pon2, Asb4, Pdk4, Dync1i1, Slc25a13, Shfm1, Dlx6os1, Dlx6, Dlx6as, Dlx5, Acn9, Tac1, Asns, C1galt1, Col28a1, Mios, Rpa3, Glcci1, Ica1, Nxph1, Ndufa4, Phf14, Gm6578, Tmem106b, Vwde, Tmem168, B630005N14Rik, Gpr85, 2610001J05Rik, Ppp1r3a, Foxp2, Mdfic, Tcfec, Tes, Cav2, Cav1, Met, Capza2, St…
			chr9	qA1 - qF4	3181342	124023520	2450	Loss	-0.328021	0	4930433N12Rik, Alkbh8, Cwf19l2, Gucy1a2, Aasdhppt, Kbtbd3, 8430410K20Rik, Gria4, Casp1, Casp4, Casp12, Pdgfd, Ddi1, Dync2h1, Dcun1d5, Mmp13, Mmp12, Mmp1b, Mmp3, Mmp1a, Mmp10, Mmp8, Mmp27, Mmp20, Mmp7, Tmem123, Birc2, Birc3, Yap1, 9230110C19Rik, AK129341, Trpc6, Pgr, 9030420J04Rik, Cntn5, Phxr4, Maml2, Mtmr2, Cep57, Fam76b, Sesn3, Endod1, Kdm4d, Cwc15, Amotl1, Piwil4, Fut4, 1700012B09Rik, Ankrd49,…
			chr10	qA1 - qD3	3051921	129787931	2025	Loss	-0.336588	0	Cnksr3, Oprm1, Ipcef1, Rgs17, Mtrf1l, Fbxo5, Vip, Myct1, Syne1, Esr1, 1700052N19Rik, Rmnd1, Gm5512, Zbtb2, Akap12, Mthfd1l, Plekhg1, Iyd, Ppp1r14c, Lrp11, Pcmt1, Nup43, Lats1, Katna1, BC013529, Ppil4, Zc3h12d, Map3k7ip2, Ust, Sash1, Samd5, Stxbp5, 9130014G24Rik, Rab32, Grm1, Shprh, Fbxo30, Epm2a, Utrn, Stx11, Sf3b5, Plagl1, Fam164b, Ltv1, Phactr2, Fuca2, Pex3, Adat2, Aig1, Hivep2, Gpr126, Vta1, N…
