# Supplementary material for: PRC2-Mediated Transcriptomic Alterations at the Embryonic Stage Govern Tumorigenesis and Clinical Outcome in MYCN-Driven Neuroblastoma
Source: Oxford University Press journal article supplement (doi:10.1158/0008-5472.can-16-3144), 2017-08-14
Supplement: 00085472can163144-sup-174843_3_supp_4166650_ktk10h.xlsx [file 00085472can163144-sup-174843_3_supp_4166650_ktk10h.xlsx]

## Sheet: 1_data processing
Sheet 1: Data processing
Sample information
Sample group name	Biological replicates	Remarks
E13.5 WT sphere_primary	4	array is duplicate excep 1 sample
E13.5 TH-MYCN sphere_passage	4	array is duplicate
Array: Agilent, SurePrint G3 Mouse GE, 8x60K
Normalization method
-Low Signal Cutoff: 1.0
-Log Transformation: Base 2
-Global Normalization: Percentile 75
-Centering: Mean
Probe selection for GO analysis	probe number	Remarks
All probes	55821
1. Remove probes if they are not well anottated	29734
- Remove probes if they do not have Entrez gene ID
- Remove probes if their Refseq numbers are starting from either XM or XR
- Remove probes if their gene names contain “predicted gene”
2. Remove if 50% of gIsWellAboveBGs = 0 at all sample groups	20562	Remove probes which signals are lower than backgroud signal
3. Remove if SD of ProcessedSignals > 2 at one of each sample groups	20403	Remove probes which signals are dramatically fluctuating within a sample group
4. Differentially expressed probes between TH-MYCN and WT sphere	4086	Fold change > x1.5, Welch's t-Test q-value < 0.1

## Sheet: 2_All probes
Sheet 2: All probes before caclucating differentially expressed genes
NAME	Fold Change	Q-Value	GENE_SYMBOL	GENE_NAME	DESCRIPTION	REFSEQ	GB_ACC	LOCUSLINK_ID	chrom	chromStart	chromEnd	strand	ID	COL	ROW	SPOT_ID	CONTROL_TYPE	UNIGENE_ID	ENSEMBL_ID	TIGR_ID	ACCESSION_STRING	CHROMOSOMAL_LOCATION	CYTOBAND	GO_ID	SEQUENCE	EntrezGene ID_Human	HGNC symbol_Human	Selection
A_52_P408391	69.5192	5.5638e-06	Neurod1	neurogenic differentiation 1	Mus musculus neurogenic differentiation 1 (Neurod1), mRNA [NM_010894]	NM_010894	NM_010894	18012	chr2	79293680	79293621	-	9807	163	67	A_52_P408391	FALSE	Mm.4636	ENSMUST00000041099		ref|NM_010894|ens|ENSMUST00000041099|gb|U28068|gb|BC018241	chr2:079293680-079293621	mm|2qC3	GO:0000978(RNA polymerase II core promoter proximal region sequence-specific DNA binding)|GO:0001077(RNA polymerase II core promoter proximal region sequence-specific DNA binding transcription factor activity involved in positive regulation of transcription)|GO:0001102(RNA polymerase II activating transcription factor binding)|GO:0001105(RNA polymerase II transcription coactivator activity)|GO:00…	TTTGTTGTGATTTTGTACAGAATTTTTAATGACTTTTTATAACGTGGATTTCCTATTTTA	4760	NEUROD1	0
A_55_P2004972	43.4292	1.01114e-05	Neurod1	neurogenic differentiation 1	Mus musculus neurogenic differentiation 1 (Neurod1), mRNA [NM_010894]	NM_010894	NM_010894	18012	chr2	79294368	79294309	-	44454	57	309	A_55_P2004972	FALSE	Mm.4636	ENSMUST00000041099		ref|NM_010894|ens|ENSMUST00000041099|gb|U28068|gb|BC018241	chr2:079294368-079294309	mm|2qC3	GO:0000978(RNA polymerase II core promoter proximal region sequence-specific DNA binding)|GO:0001077(RNA polymerase II core promoter proximal region sequence-specific DNA binding transcription factor activity involved in positive regulation of transcription)|GO:0001102(RNA polymerase II activating transcription factor binding)|GO:0001105(RNA polymerase II transcription coactivator activity)|GO:00…	CGCTCAGCATCAATGGCAACTTCTCTTTCAAACACGAACCATCCGCCGAGTTTGAAAAAA	4760	NEUROD1	0
A_52_P425667	14.762	5.75174e-07	Adcyap1	adenylate cyclase activating polypeptide 1	Mus musculus adenylate cyclase activating polypeptide 1 (Adcyap1), mRNA [NM_009625]	NM_009625	NM_009625	11516	chr17	93604401	93604460	+	21995	125	292	A_52_P425667	FALSE	Mm.3407	ENSMUST00000064775		ref|NM_009625|ens|ENSMUST00000064775|gb|BC057344|gb|AK142765	chr17:093604401-093604460	mm|17qE5	GO:0001541(ovarian follicle development)|GO:0001662(behavioral fear response)|GO:0001821(histamine secretion)|GO:0002865(negative regulation of acute inflammatory response to antigenic stimulus)|GO:0002878(negative regulation of acute inflammatory response to non-antigenic stimulus)|GO:0005057(receptor signaling protein activity)|GO:0005102(receptor binding)|GO:0005179(hormone activity)|GO:000518…	GTTCCACTGCCTGACAGATCAGGTGCTGGTGTTGGAATGAATGCAAAGTACAATGTGTTT	116	ADCYAP1	0
A_51_P495462	14.6719	1.43127e-05	Gad2	glutamic acid decarboxylase 2	Mus musculus glutamic acid decarboxylase 2 (Gad2), mRNA [NM_008078]	NM_008078	NM_008078	14417	chr2	22549095	22549154	+	5313	176	200	A_51_P495462	FALSE	Mm.4784	ENSMUST00000028123		ref|NM_008078|ens|ENSMUST00000028123|gb|AK018118|gb|AK161857	chr2:022549095-022549154	mm|2qA3	GO:0003824(catalytic activity)|GO:0004351(glutamate decarboxylase activity)|GO:0005737(cytoplasm)|GO:0005794(Golgi apparatus)|GO:0005829(cytosol)|GO:0005886(plasma membrane)|GO:0006540(glutamate decarboxylation to succinate)|GO:0016020(membrane)|GO:0016595(glutamate binding)|GO:0016829(lyase activity)|GO:0016831(carboxy-lyase activity)|GO:0019752(carboxylic acid metabolic process)|GO:0030054(cell…	AGTAACAGGACAAAGAAGCAAAAACATCAAACCAGGTATCATCTTGCACGTGCTTTTCTG	2572	GAD2	0
A_51_P440985	14.0011	7.85367e-05	Fgf15	fibroblast growth factor 15	Mus musculus fibroblast growth factor 15 (Fgf15), mRNA [NM_008003]	NM_008003	NM_008003	14170	chr7	152086371	152086430	+	60387	8	260	A_51_P440985	FALSE	Mm.3904	ENSMUST00000033389		ref|NM_008003|ens|ENSMUST00000033389|gb|AK017829|gb|AF007268	chr7:152086371-152086430	mm|7qF5	GO:0001755(neural crest cell migration)|GO:0001934(positive regulation of protein phosphorylation)|GO:0005102(receptor binding)|GO:0005104(fibroblast growth factor receptor binding)|GO:0005515(protein binding)|GO:0005576(extracellular region)|GO:0007507(heart development)|GO:0008083(growth factor activity)|GO:0008284(positive regulation of cell proliferation)|GO:0008543(fibroblast growth factor r…	CCCTTTTCCACTTATAAATGTCAGATGGAAGTGACCCTTAGCTGAGTGCATAGCCAAGCT	9965	FGF19	0
A_51_P436491	11.7146	0.000112814	Lingo3	leucine rich repeat and Ig domain containing 3	Mus musculus leucine rich repeat and Ig domain containing 3 (Lingo3), mRNA [NM_001013758]	NM_001013758	NM_001013758	237403	chr10	80295883	80295824	-	49189	43	23	A_51_P436491	FALSE	Mm.40213	ENSMUST00000053986		ref|NM_001013758|ens|ENSMUST00000053986|ref|XM_006513623|ref|XM_006513620	chr10:080295883-080295824	mm|10qC1	GO:0003674(molecular_function)|GO:0005575(cellular_component)|GO:0008150(biological_process)|GO:0016020(membrane)|GO:0016021(integral to membrane)	GACTTTCCCATCACATACAAACTGATTGACAGGACACGAATGACTGGGTTGACTGGCATT	645191	LINGO3	0
A_66_P113749	9.64081	1.37447e-05	Il2rg	interleukin 2 receptor, gamma chain	Mus musculus interleukin 2 receptor, gamma chain (Il2rg), mRNA [NM_013563]	NM_013563	NM_013563	16186	chrX	98460189	98460130	-	40550	69	245	A_66_P113749	FALSE	Mm.2923	ENSMUST00000033664		ref|NM_013563|ens|ENSMUST00000033664|gb|AK153873|gb|KC815469	chrX:098460189-098460130	mm|XqD	GO:0004896(cytokine receptor activity)|GO:0009897(external side of plasma membrane)|GO:0009986(cell surface)|GO:0010468(regulation of gene expression)|GO:0010628(positive regulation of gene expression)|GO:0016020(membrane)|GO:0016021(integral to membrane)|GO:0019976(interleukin-2 binding)|GO:0019982(interleukin-7 binding)|GO:0032831(positive regulation of CD4-positive, CD25-positive, alpha-beta r…	CATCAATCCTTTGATGGAACCTCAAAGTCCTATAGTCCTAAGTGACGCTAACCTCCCCTA	3561	IL2RG	0
A_52_P54770	9.38212	2.09224e-05	Fam19a4	family with sequence similarity 19, member A4	Mus musculus family with sequence similarity 19, member A4 (Fam19a4), mRNA [NM_177233]	NM_177233	NM_177233	320701	chr6	96781471	96781412	-	57000	19	145	A_52_P54770	FALSE	Mm.131700	ENSMUST00000089295		ref|NM_177233|ens|ENSMUST00000089295|ref|XM_006506285|ref|XM_006506284	chr6:096781471-096781412	mm|6qD3	GO:0003674(molecular_function)|GO:0005575(cellular_component)|GO:0005576(extracellular region)|GO:0042391(regulation of membrane potential)|GO:0051930(regulation of sensory perception of pain)	CACATCTGTAATGTGGGATTGATTGTATGTATTAAGAAATGTTGACAGTATACTTGCTGC	151647	FAM19A4	0
A_51_P502437	8.04318	1.246e-05	Cacna2d3	calcium channel, voltage-dependent, alpha2/delta subunit 3	Mus musculus calcium channel, voltage-dependent, alpha2/delta subunit 3 (Cacna2d3), mRNA [NM_009785]	NM_009785	NM_009785	12294	chr14	29718458	29718399	-	4099	180	4	A_51_P502437	FALSE	Mm.386754	ENSMUST00000022567		ref|NM_009785|ens|ENSMUST00000022567|ref|XM_006518486|ref|XM_011244938	chr14:029718458-029718399	mm|14qA3	GO:0005244(voltage-gated ion channel activity)|GO:0005245(voltage-gated calcium channel activity)|GO:0005246(calcium channel regulator activity)|GO:0005262(calcium channel activity)|GO:0005891(voltage-gated calcium channel complex)|GO:0006810(transport)|GO:0006811(ion transport)|GO:0006816(calcium ion transport)|GO:0016020(membrane)|GO:0016021(integral to membrane)|GO:0034765(regulation of ion tr…	CAAGGTGACACTAACTAATGGGATGTTCTTTTGGCATGCTATAAATCATGGATAAACTGT	55799	CACNA2D3	0
A_55_P2170584	7.61767	1.2583e-05	Fam19a4	family with sequence similarity 19, member A4	Mus musculus family with sequence similarity 19, member A4 (Fam19a4), mRNA [NM_177233]	NM_177233	NM_177233	320701	chr6	96793812	96793753	-	48991	43	92	A_55_P2170584	FALSE	Mm.131700	ENSMUST00000089295		ref|NM_177233|ens|ENSMUST00000089295|ref|XM_006506285|ref|XM_006506284	chr6:096793812-096793753	mm|6qD3	GO:0003674(molecular_function)|GO:0005575(cellular_component)|GO:0005576(extracellular region)|GO:0042391(regulation of membrane potential)|GO:0051930(regulation of sensory perception of pain)	ACTGTAAAGTGCTTCCAGACTCTTCGGGTTGGTCCTGTAGCAGTGGCAATAAAGTCAAAA	151647	FAM19A4	0
A_51_P450469	7.6002	6.94805e-05	Pnoc	prepronociceptin	Mus musculus prepronociceptin (Pnoc), transcript variant 1, mRNA [NM_010932]	NM_010932	NM_010932	18155	chr14	66020564	66020505	-	5401	176	24	A_51_P450469	FALSE	Mm.16347	ENSMUST00000059339		ref|NM_010932|ref|NM_001205075|ens|ENSMUST00000059339|ref|XM_006518684	chr14:066020564-066020505	mm|14qD1	GO:0001515(opioid peptide activity)|GO:0005576(extracellular region)|GO:0007218(neuropeptide signaling pathway)|GO:0007268(synaptic transmission)	GTCTCACCACGATCCTGTTGCTACATCAGAGTGTATTTTTGTAATTTCTCCAGCTAACAT	5368	PNOC	0
A_55_P2181341	7.56273	0.000882519	Ecel1	endothelin converting enzyme-like 1	Mus musculus endothelin converting enzyme-like 1 (Ecel1), transcript variant 1, mRNA [NM_001277925]	NM_001277925	NM_001277925	13599	chr1	89044292	89044233	-	11032	159	241	A_55_P2181341	FALSE	Mm.140765	ENSMUST00000027463		ref|NM_001277925|ref|NM_021306|ens|ENSMUST00000027463|ens|ENSMUST00000161002	chr1:089044292-089044233	mm|1qD	GO:0003016(respiratory system process)|GO:0004222(metalloendopeptidase activity)|GO:0005622(intracellular)|GO:0005887(integral to plasma membrane)|GO:0006508(proteolysis)|GO:0007218(neuropeptide signaling pathway)|GO:0008233(peptidase activity)|GO:0008237(metallopeptidase activity)|GO:0016020(membrane)|GO:0016021(integral to membrane)|GO:0016787(hydrolase activity)|GO:0035556(intracellular signal…	ATAGGTCCCACTGATGTGTTCTTGCTGATTAGTCTGGTCAATAAAGCTGCTGTACTATAT	9427	ECEL1	0
A_55_P2042855	7.24543	7.40871e-05	Disc1	disrupted in schizophrenia 1	Mus musculus disrupted in schizophrenia 1 (Disc1), transcript variant 1, mRNA [NM_174854]	NM_174854	NM_174854	244667	chr8	127774905	127774964	+	54938	25	6	A_55_P2042855	FALSE	Mm.233504	ENSMUST00000118942		ref|NM_174854|ref|NM_174853|ens|ENSMUST00000118942|ens|ENSMUST00000121953	chr8:127774905-127774964	mm|8qE2	GO:0000226(microtubule cytoskeleton organization)|GO:0001764(neuron migration)|GO:0001954(positive regulation of cell-matrix adhesion)|GO:0002052(positive regulation of neuroblast proliferation)|GO:0005515(protein binding)|GO:0005634(nucleus)|GO:0005737(cytoplasm)|GO:0005739(mitochondrion)|GO:0005783(endoplasmic reticulum)|GO:0005813(centrosome)|GO:0005856(cytoskeleton)|GO:0005871(kinesin complex…	CTCCTACACCTGGAAGACCAGCTTCTCGGAGCCATGTACAGTCACGATGAGGCTCTCTTT	27185	DISC1	0
A_51_P301603	7.07583	1.21948e-05	AI854517	expressed sequence AI854517	Mus musculus expressed sequence AI854517 (AI854517), transcript variant 1, long non-coding RNA [NR_040311]	NR_040311	NR_040311	101694	chr7	86677283	86677342	+	3335	182	220	A_51_P301603	FALSE	Mm.41661			ref|NR_040311|ref|NR_040312|ref|NR_040313|ref|NR_040314	chr7:86677283-86677342	mm|7qD3	GO:0003674(molecular_function)|GO:0005575(cellular_component)|GO:0008150(biological_process)	GACTAATTTCACTTCAGATATACTGGAAAAGTTTGCTAAGAACATGGACAAAGACCTGTG			0
A_51_P219266	6.39182	0.000624027	Tmprss6	transmembrane serine protease 6	Mus musculus transmembrane serine protease 6 (Tmprss6), mRNA [NM_027902]	NM_027902	NM_027902	71753	chr15	78270317	78270258	-	31908	95	146	A_51_P219266	FALSE	Mm.34056	ENSMUST00000017086		ref|NM_027902|ens|ENSMUST00000017086|ref|XM_006521416|ref|XM_006521417	chr15:078270317-078270258	mm|15qE1	GO:0004252(serine-type endopeptidase activity)|GO:0005615(extracellular space)|GO:0005886(plasma membrane)|GO:0006508(proteolysis)|GO:0008233(peptidase activity)|GO:0008236(serine-type peptidase activity)|GO:0016020(membrane)|GO:0016021(integral to membrane)|GO:0016787(hydrolase activity)|GO:0030514(negative regulation of BMP signaling pathway)|GO:0033619(membrane protein proteolysis)|GO:0042730(…	AGCCTCTTGGGGGAACTGCACAGAGAAAGAAGGTGCCTCTATCAAGGCTCTATCAGAGCC	164656	TMPRSS6	0
A_51_P271311	6.23592	0.000159556	Slc6a11	solute carrier family 6 (neurotransmitter transporter, GABA), member 11	Mus musculus solute carrier family 6 (neurotransmitter transporter, GABA), member 11 (Slc6a11), mRNA [NM_172890]	NM_172890	NM_172890	243616	chr6	114199514	114199573	+	39198	73	325	A_51_P271311	FALSE	Mm.44683	ENSMUST00000032451		ref|NM_172890|ens|ENSMUST00000032451|gb|AK140423|gb|AK053078	chr6:114199514-114199573	mm|6qE3	GO:0003333(amino acid transmembrane transport)|GO:0005328(neurotransmitter:sodium symporter activity)|GO:0005332(gamma-aminobutyric acid:sodium symporter activity)|GO:0005737(cytoplasm)|GO:0005887(integral to plasma membrane)|GO:0006810(transport)|GO:0006836(neurotransmitter transport)|GO:0015293(symporter activity)|GO:0015812(gamma-aminobutyric acid transport)|GO:0016020(membrane)|GO:0016021(int…	ACAGATCCCTGATGTCTGTCACTATAGACACACGTGTTGTACATGTGGCCCTTAACACTT	6538	SLC6A11	0
A_55_P1986461	6.14257	4.13772e-05	Pde4d	phosphodiesterase 4D, cAMP specific	Mus musculus 10 days neonate cerebellum cDNA, RIKEN full-length enriched library, clone:6530402G16 product:Phosphodiesterase 4D, full insert sequence. [AK032648]		AK032648	238871	chr13	109910773	109910832	+	19789	132	112	A_55_P1986461	FALSE				gb|AK032648|riken|6530402G16|nap|NAP075165-1	chr13:109910773-109910832	mm|13qD2.1	GO:0002027(regulation of heart rate)|GO:0004114(3',5'-cyclic-nucleotide phosphodiesterase activity)|GO:0005515(protein binding)|GO:0005737(cytoplasm)|GO:0005856(cytoskeleton)|GO:0005886(plasma membrane)|GO:0005891(voltage-gated calcium channel complex)|GO:0006198(cAMP catabolic process)|GO:0006939(smooth muscle contraction)|GO:0007165(signal transduction)|GO:0007568(aging)|GO:0008081(phosphoric d…	CACGGCAGCCATTTACCTTAACTGACAAAAGCTTTTTCTTTGACTTCTCTTTATAGAAAA	5144	PDE4D	0
A_51_P455647	6.08885	1.03163e-05	Car2	carbonic anhydrase 2	Mus musculus carbonic anhydrase 2 (Car2), mRNA [NM_009801]	NM_009801	NM_009801	12349	chr3	14900206	14900265	+	59961	10	127	A_51_P455647	FALSE	Mm.1186	ENSMUST00000029078		ref|NM_009801|ens|ENSMUST00000029078|ref|XM_006530050|gb|AK002333	chr3:014900206-014900265	mm|3qA1	GO:0002009(morphogenesis of an epithelium)|GO:0004064(arylesterase activity)|GO:0004089(carbonate dehydratase activity)|GO:0005615(extracellular space)|GO:0005623(cell)|GO:0005737(cytoplasm)|GO:0005829(cytosol)|GO:0005886(plasma membrane)|GO:0005902(microvillus)|GO:0006730(one-carbon metabolic process)|GO:0006885(regulation of pH)|GO:0008270(zinc ion binding)|GO:0015670(carbon dioxide transport)|…	CCTCTCATCCGTTGTGCTTACTAACAAAATGTGAAAAGCAAGACCCAGGTGTCTCATGTG	760	CA2	0
A_52_P625218	5.92208	1.80618e-05	Sorcs3	sortilin-related VPS10 domain containing receptor 3	Mus musculus sortilin-related VPS10 domain containing receptor 3 (Sorcs3), mRNA [NM_025696]	NM_025696	NM_025696	66673	chr19	48879755	48879814	+	44283	57	324	A_52_P625218	FALSE	Mm.70980	ENSMUST00000078880		ref|NM_025696|ens|ENSMUST00000078880|gb|AK082681|gb|AK018111	chr19:048879755-048879814	mm|19qD1	GO:0005515(protein binding)|GO:0007612(learning)|GO:0007613(memory)|GO:0016020(membrane)|GO:0016021(integral to membrane)|GO:1900452(regulation of long term synaptic depression)	AGTATCAGAAGGGTTTCTAAAGACCCTTCTTTTTCATTTCAAGGGTTAAATGGGGCAGAC	22986	SORCS3	0
A_55_P2244941	5.69275	0.000145694	A330074H02Rik	RIKEN cDNA A330074H02 gene	Mus musculus adult male spinal cord cDNA, RIKEN full-length enriched library, clone:A330074H02 product:unclassifiable, full insert sequence. [AK039621]		AK039621	402758	chr7	86656210	86656269	+	54677	26	199	A_55_P2244941	FALSE				gb|AK039621|riken|A330074H02	chr7:86656210-86656269	mm|7qD3		TTCTCGGAATCGGGTTAATTTTCCCTTGGCTAATCCTCAAACCCATTAAGTTCTCCTCTC			0
A_51_P447614	5.60453	6.68973e-06	Plekhh2	pleckstrin homology domain containing, family H (with MyTH4 domain) member 2	Mus musculus pleckstrin homology domain containing, family H (with MyTH4 domain) member 2 (Plekhh2), mRNA [NM_177606]	NM_177606	NM_177606	213556	chr17	85020524	85020583	+	59471	11	124	A_51_P447614	FALSE	Mm.215159	ENSMUST00000047206		ref|NM_177606|ens|ENSMUST00000047206|ref|XM_011246356|ref|XM_011246357	chr17:085020524-085020583	mm|17qE4	GO:0003779(actin binding)|GO:0005515(protein binding)|GO:0005737(cytoplasm)|GO:0005856(cytoskeleton)|GO:0005886(plasma membrane)|GO:0016020(membrane)|GO:0030027(lamellipodium)|GO:0030835(negative regulation of actin filament depolymerization)|GO:0030864(cortical actin cytoskeleton)|GO:0042802(identical protein binding)|GO:0042995(cell projection)	GACATATATTTATCACTGTCGTGCTATATGCTTTAAACTGATTTGAGAATGTGCTAGGTG	130271	PLEKHH2	0
A_66_P126323	5.42896	2.09749e-05	9230102O04Rik	RIKEN cDNA 9230102O04 gene	Mus musculus RIKEN cDNA 9230102O04 gene (9230102O04Rik), long non-coding RNA [NR_040511]	NR_040511	NR_040511	77682	chr2	9804803	9804744	-	61110	6	126	A_66_P126323	FALSE	Mm.488621	ENSMUST00000114915		ref|NR_040511|ens|ENSMUST00000114915|ens|ENSMUST00000125091|gb|AK020309	chr2:9804803-9804744	mm|2qA1	GO:0003674(molecular_function)|GO:0005575(cellular_component)|GO:0008150(biological_process)	CCTAAGACAAAATGATCAAGGAACCCAACCCGTACCTTCACAACCAGACCCTCCGGGTTA			0
A_52_P642488	5.40631	1.32111e-09	Kcnk1	potassium channel, subfamily K, member 1	Mus musculus potassium channel, subfamily K, member 1 (Kcnk1), mRNA [NM_008430]	NM_008430	NM_008430	16525	chr8	128554281	128554340	+	39189	73	16	A_52_P642488	FALSE	Mm.10800	ENSMUST00000046765		ref|NM_008430|ens|ENSMUST00000046765|ref|XM_006530716|gb|AK005326	chr8:128554281-128554340	mm|8qE2	GO:0005242(inward rectifier potassium channel activity)|GO:0005244(voltage-gated ion channel activity)|GO:0005267(potassium channel activity)|GO:0005515(protein binding)|GO:0005737(cytoplasm)|GO:0005768(endosome)|GO:0005886(plasma membrane)|GO:0005887(integral to plasma membrane)|GO:0006810(transport)|GO:0006811(ion transport)|GO:0006813(potassium ion transport)|GO:0016020(membrane)|GO:0016021(in…	CCTAACAAACTCAAGAGAAAATCGGTACGATATTCTGTTCCTGTATACATTTCTACCCTC	3775	KCNK1	0
A_55_P1990400	5.34804	0.00620776	Htr4	5 hydroxytryptamine (serotonin) receptor 4	Mus musculus 5 hydroxytryptamine (serotonin) receptor 4 (Htr4), mRNA [NM_008313]	NM_008313	NM_008313	15562	chr18	62627259	62627318	+	3302	182	286	A_55_P1990400	FALSE	Mm.20440	ENSMUST00000027560		ref|NM_008313|ens|ENSMUST00000027560|ref|XM_011246847|ref|XM_006525681	chr18:062627259-062627318	mm|18qE1	GO:0004871(signal transducer activity)|GO:0004930(G-protein coupled receptor activity)|GO:0004993(serotonin receptor activity)|GO:0005515(protein binding)|GO:0005737(cytoplasm)|GO:0005768(endosome)|GO:0005886(plasma membrane)|GO:0005887(integral to plasma membrane)|GO:0007165(signal transduction)|GO:0007186(G-protein coupled receptor signaling pathway)|GO:0007189(adenylate cyclase-activating G-pr…	CAGGAATATGTTCTTGGAAAACACAGGGACCTTCACAGGTTTTGTTTTTAAACTGATTAA	3360	HTR4	0
A_52_P617076	5.28606	0.000517023	Galntl6	UDP-N-acetyl-alpha-D-galactosamine:polypeptide N-acetylgalactosaminyltransferase-like 6	Mus musculus UDP-N-acetyl-alpha-D-galactosamine:polypeptide N-acetylgalactosaminyltransferase-like 6 (Galntl6), mRNA [NM_175032]	NM_175032	NM_175032	270049	chr8	60256073	60256014	-	7831	169	83	A_52_P617076	FALSE	Mm.236368	ENSMUST00000098757		ref|NM_175032|ens|ENSMUST00000098757|ref|XM_011242225|gb|AK006215	chr8:060256073-060256014	mm|8qB2	GO:0000009(alpha-1,6-mannosyltransferase activity)|GO:0000026(alpha-1,2-mannosyltransferase activity)|GO:0000030(mannosyltransferase activity)|GO:0000033(alpha-1,3-mannosyltransferase activity)|GO:0001962(alpha-1,3-galactosyltransferase activity)|GO:0003674(molecular_function)|GO:0003980(UDP-glucose:glycoprotein glucosyltransferase activity)|GO:0004376(glycolipid mannosyltransferase activity)|GO:…	CCAGATGTGACCCTCTATCTGAGACTCAGCAATGGATTTTTGAACATATCAACATGACTG	442117	GALNTL6	0
A_51_P247694	5.25437	0.00427372	Adgrg3	adhesion G protein-coupled receptor G3	Mus musculus adhesion G protein-coupled receptor G3 (Adgrg3), mRNA [NM_173036]	NM_173036	NM_173036	54672	chr8	97568989	97569048	+	13038	153	165	A_51_P247694	FALSE	Mm.27995	ENSMUST00000051259		ref|NM_173036|ens|ENSMUST00000051259|ref|XM_006531200|ref|XM_006531198	chr8:097568989-097569048	mm|8qD1	GO:0004871(signal transducer activity)|GO:0004888(transmembrane signaling receptor activity)|GO:0004930(G-protein coupled receptor activity)|GO:0005886(plasma membrane)|GO:0005887(integral to plasma membrane)|GO:0007165(signal transduction)|GO:0007166(cell surface receptor signaling pathway)|GO:0007186(G-protein coupled receptor signaling pathway)|GO:0016020(membrane)|GO:0016021(integral to membr…	CCAAGGGGGAAAAGGGAGAAAAAGCAGCTCTTCCCACGACGTCTGTACTCTTATGGGACA	222487	ADGRG3	0
A_52_P326664	5.13199	1.80618e-05	Unc93a	unc-93 homolog A (C. elegans)	Mus musculus unc-93 homolog A (C. elegans) (Unc93a), mRNA [NM_199252]	NM_199252	NM_199252	381058	chr17	13301545	13301486	-	45449	54	287	A_52_P326664	FALSE	Mm.390935	ENSMUST00000084966		ref|NM_199252|ens|ENSMUST00000084966|gb|AJ422143	chr17:013301545-013301486	mm|17qA1	GO:0003674(molecular_function)|GO:0005886(plasma membrane)|GO:0008150(biological_process)|GO:0016020(membrane)|GO:0016021(integral to membrane)	GTTTTGGGCCTCTTAAAAGTTCCCGGGGGATTTTCTAAATAAACAGTGAAATTGTTTTAT	54346	UNC93A	0
A_51_P408430	5.0684	1.61676e-06	Col24a1	collagen, type XXIV, alpha 1	Mus musculus collagen, type XXIV, alpha 1 (Col24a1), mRNA [NM_027770]	NM_027770	NM_027770	71355	chr3	145214473	145214532	+	59669	11	55	A_51_P408430	FALSE	Mm.235570	ENSMUST00000029848		ref|NM_027770|ens|ENSMUST00000029848|ref|XM_006502100|ref|XM_011240232	chr3:145214473-145214532	mm|3qH2	GO:0002244(hemopoietic progenitor cell differentiation)|GO:0003674(molecular_function)|GO:0005201(extracellular matrix structural constituent)|GO:0005575(cellular_component)|GO:0005576(extracellular region)|GO:0005578(proteinaceous extracellular matrix)|GO:0005581(collagen)	AAAGTACTTCAGGCCACCTAAATCCAGTGGTAGGTTTGGATTAGAAACTGGTGTTTGTGA	255631	COL24A1	0
A_55_P1971010	5.00511	0.00207163	Gzme	granzyme E	Mus musculus granzyme E (Gzme), mRNA [NM_010373]	NM_010373	NM_010373	14942	chr14	56736635	56736576	-	43963	58	308	A_55_P1971010	FALSE	Mm.14424	ENSMUST00000089549		ref|NM_010373|ref|NM_010372|ens|ENSMUST00000089549|ens|ENSMUST00000082093	chr14:056736635-056736576	mm|14qC3	GO:0004252(serine-type endopeptidase activity)|GO:0005737(cytoplasm)|GO:0006508(proteolysis)|GO:0006955(immune response)|GO:0008233(peptidase activity)|GO:0008236(serine-type peptidase activity)|GO:0008626(induction of apoptosis by granzyme)|GO:0016020(membrane)|GO:0016485(protein processing)|GO:0016787(hydrolase activity)|GO:0019835(cytolysis)|GO:0043231(intracellular membrane-bounded organelle)	AATCTCTTCAGGAGTCTTCACTAAGATTGTGCACTTCCTGCCGTGGATAAGCAGGAACAT	2999	GZMH	0
A_51_P443403	4.84758	0.000166092	Smoc1	SPARC related modular calcium binding 1	Mus musculus SPARC related modular calcium binding 1 (Smoc1), transcript variant 2, mRNA [NM_022316]	NM_022316	NM_022316	64075	chr12	82286760	82286819	+	36939	80	251	A_51_P443403	FALSE	Mm.273295	ENSMUST00000021564		ref|NM_022316|ref|NM_001146217|ens|ENSMUST00000021564|ens|ENSMUST00000110347	chr12:082286760-082286819	mm|12qD1	GO:0001654(eye development)|GO:0005509(calcium ion binding)|GO:0005576(extracellular region)|GO:0005578(proteinaceous extracellular matrix)|GO:0005604(basement membrane)|GO:0007165(signal transduction)|GO:0007275(multicellular organismal development)|GO:0010811(positive regulation of cell-substrate adhesion)|GO:0030154(cell differentiation)|GO:0030198(extracellular matrix organization)|GO:0045667…	CTAGGTGACATGCTGATTCAGAGGTCCTTCAGTCAGAGCAGCAAGTGATACTTAGCAGCT	64093	SMOC1	0
A_51_P245789	4.84707	1.26917e-07	Pcolce2	procollagen C-endopeptidase enhancer 2	Mus musculus procollagen C-endopeptidase enhancer 2 (Pcolce2), mRNA [NM_029620]	NM_029620	NM_029620	76477	chr9	95595436	95595495	+	51550	35	222	A_51_P245789	FALSE	Mm.46016			ref|NM_029620|gb|AF352788|gb|AK010249|gb|BC051174	chr9:095595436-095595495	mm|9qE3.3	GO:0005518(collagen binding)|GO:0005576(extracellular region)|GO:0008201(heparin binding)|GO:0010952(positive regulation of peptidase activity)|GO:0016504(peptidase activator activity)|GO:0070062(extracellular vesicular exosome)	TCATGCCAAACAGCTTTGTCAAAATGTTCAAGAATAAGAATCAGAAGCCCATGAACGCAC	26577	PCOLCE2	0
A_55_P2031272	4.83596	0.0190413	Lhx3	LIM homeobox protein 3	Mus musculus LIM homeobox protein 3 (Lhx3), transcript variant 1, mRNA [NM_001039653]	NM_001039653	NM_001039653	16871	chr2	26055805	26055746	-	2631	184	316	A_55_P2031272	FALSE	Mm.386765	ENSMUST00000054099		ref|NM_001039653|ref|NM_010711|ens|ENSMUST00000054099|ens|ENSMUST00000028302	chr2:026055805-026055746	mm|2qA3	GO:0001076(RNA polymerase II transcription factor binding transcription factor activity)|GO:0001890(placenta development)|GO:0003677(DNA binding)|GO:0005515(protein binding)|GO:0005622(intracellular)|GO:0005634(nucleus)|GO:0005667(transcription factor complex)|GO:0006351(transcription, DNA-dependent)|GO:0006355(regulation of transcription, DNA-dependent)|GO:0006357(regulation of transcription fro…	TGTAACTTTTATTTATTCCCTGGTGATCCGCTCTTTCCAAGACTTCAATAAATTTGTCAG	8022	LHX3	0
A_55_P2050483	4.79713	5.59758e-05	Abcc12	ATP-binding cassette, sub-family C (CFTR/MRP), member 12	Mus musculus ATP-binding cassette, sub-family C (CFTR/MRP), member 12 (Abcc12), mRNA [NM_172912]	NM_172912	NM_172912	244562	chr8	89028799	89028740	-	36537	81	72	A_55_P2050483	FALSE	Mm.67485	ENSMUST00000131806		ref|NM_172912|ens|ENSMUST00000131806|ens|ENSMUST00000156610|ens|ENSMUST00000080115	chr8:089028799-089028740	mm|8qC3	GO:0000166(nucleotide binding)|GO:0005524(ATP binding)|GO:0005739(mitochondrion)|GO:0006810(transport)|GO:0016020(membrane)|GO:0016021(integral to membrane)|GO:0016887(ATPase activity)|GO:0042626(ATPase activity, coupled to transmembrane movement of substances)|GO:0055085(transmembrane transport)	TAAAAGCAAATGAGATGGGAAAATGCCCAAGGCTGGAGATGACAGCGTTCCTGGATTTTG	94160	ABCC12	0
A_55_P2005335	4.7387	0.000212047	Kcng2	potassium voltage-gated channel, subfamily G, member 2	Mus musculus potassium voltage-gated channel, subfamily G, member 2 (Kcng2), mRNA [NM_001190373]	NM_001190373	NM_001190373	240444	chr18	80492427	80492368	-	57810	16	166	A_55_P2005335	FALSE	Mm.279568	ENSMUST00000077962		ref|NM_001190373|ens|ENSMUST00000077962|ref|XM_011247078|ref|XM_006526467	chr18:080492427-080492368	mm|18qE3	GO:0005251(delayed rectifier potassium channel activity)|GO:0016021(integral to membrane)|GO:0034765(regulation of ion transmembrane transport)|GO:0070062(extracellular vesicular exosome)|GO:0071805(potassium ion transmembrane transport)	TCTCAGGACCCTGAGACCGCAGGCGCGGCAGGGAGCTTGCCGGGCCGGGTGGGACCCTGA	26251	KCNG2	0
A_55_P2302413	4.73605	0.00132555	BC002189	cDNA sequence BC002189	Mus musculus cDNA sequence BC002189, mRNA (cDNA clone MGC:7386 IMAGE:3487872), complete cds. [BC002189]		BC002189	620316	chr3	19586432	19586491	+	48891	43	292	A_55_P2302413	FALSE	Mm.450006			gb|BC002189|tc|TC1594247	chr3:19586432-19586491	mm|3qA2		TTTGTCATGCAAGCCACACAAGCACATTTCTGCTTTGTTTGCAGAACTTCTAAGTCCAGA			0
A_55_P1989599	4.55624	0.0021806	Spdyb	speedy homolog B (Xenopus laevis)	Mus musculus speedy homolog B (Xenopus laevis) (Spdyb), mRNA [NM_029048]	NM_029048	NM_029048	74673	chr5	143978054	143977995	-	4288	179	282	A_55_P1989599	FALSE	Mm.273303	ENSMUST00000085733		ref|NM_029048|ens|ENSMUST00000085733|gb|AK015441|tc|TC1601384	chr5:143978054-143977995	mm|5qG2	GO:0005575(cellular_component)|GO:0005634(nucleus)|GO:0007049(cell cycle)|GO:0019901(protein kinase binding)|GO:0045737(positive regulation of cyclin-dependent protein kinase activity)	CTCCTTGCACTGTGGACAGACAATAAAGATGAAATGTGTTTCATTTTCTATATGTAAGCT	100310812	SPDYE2B	0
A_55_P2142928	4.44076	0.00533394	Cadm2	cell adhesion molecule 2	Mus musculus cell adhesion molecule 2 (Cadm2), transcript variant 1, mRNA [NM_178721]	NM_178721	NM_178721	239857	chr16	66663397	66663338	-	1815	187	307	A_55_P2142928	FALSE	Mm.394300	ENSMUST00000120898		ref|NM_178721|ref|NM_001145977|ens|ENSMUST00000120898|ens|ENSMUST00000120594	chr16:066663397-066663338	mm|16qC1.3	GO:0005515(protein binding)|GO:0005737(cytoplasm)|GO:0005886(plasma membrane)|GO:0007155(cell adhesion)|GO:0016020(membrane)|GO:0016021(integral to membrane)|GO:0030054(cell junction)|GO:0030424(axon)|GO:0032809(neuronal cell body membrane)|GO:0042995(cell projection)|GO:0045202(synapse)	ATTATCAATGCTGAAGGCAGCCAAGTCAATGCCGAAGAGAAAAAAGAGTATTTCATTTAA	253559	CADM2	0
A_55_P1952304	4.36694	0.000191008	Usp44	ubiquitin specific peptidase 44	Mus musculus ubiquitin specific peptidase 44 (Usp44), transcript variant 1, mRNA [NM_001206851]	NM_001206851	NM_001206851	327799	chr10	93320736	93320795	+	24421	118	32	A_55_P1952304	FALSE	Mm.491598			ref|NM_001206851	chr10:093320736-093320795	mm|10qC2	GO:0004843(ubiquitin-specific protease activity)|GO:0005634(nucleus)|GO:0005730(nucleolus)|GO:0006508(proteolysis)|GO:0006511(ubiquitin-dependent protein catabolic process)|GO:0007049(cell cycle)|GO:0007067(mitosis)|GO:0008233(peptidase activity)|GO:0008234(cysteine-type peptidase activity)|GO:0008270(zinc ion binding)|GO:0015630(microtubule cytoskeleton)|GO:0016579(protein deubiquitination)|GO:0…	GTGCTTCATTGTTTTTATTCTGGAATTATGATCAGTGCCTGCTATGTTTAGACATTGTGT	84101	USP44	0
A_55_P2160451	4.24922	2.90676e-05	Stk26	serine/threonine kinase 26	Mus musculus serine/threonine kinase 26 (Stk26), mRNA [NM_133729]	NM_133729	NM_133729	70415	chrX	48242868	48242927	+	8668	166	50	A_55_P2160451	FALSE	Mm.391246	ENSMUST00000146956		ref|NM_133729|ens|ENSMUST00000146956|gb|AK011445|gb|BC132438	chrX:048242868-048242927	mm|XqA5	GO:0000139(Golgi membrane)|GO:0000166(nucleotide binding)|GO:0000287(magnesium ion binding)|GO:0004672(protein kinase activity)|GO:0004674(protein serine/threonine kinase activity)|GO:0005524(ATP binding)|GO:0005634(nucleus)|GO:0005654(nucleoplasm)|GO:0005737(cytoplasm)|GO:0005794(Golgi apparatus)|GO:0005798(Golgi-associated vesicle)|GO:0005813(centrosome)|GO:0005829(cytosol)|GO:0006468(protein p…	GCAAGATCTTGTGCAAACCTTGAGCTGTTTGTCTATGATAATCACACCTGCATTTGCCGA	51765	STK26	0
A_55_P2029995	4.18035	0.00423088	Syndig1	synapse differentiation inducing 1	Mus musculus synapse differentiation inducing 1 (Syndig1), mRNA [NM_001085521]	NM_001085521	NM_001085521	433485	chr2	149830069	149830128	+	17395	139	308	A_55_P2029995	FALSE	Mm.330649	ENSMUST00000109934		ref|NM_001085521|ens|ENSMUST00000109934|ens|ENSMUST00000109935|tc|TC1625584	chr2:149830069-149830128	mm|2qG3	GO:0000139(Golgi membrane)|GO:0005768(endosome)|GO:0005886(plasma membrane)|GO:0005887(integral to plasma membrane)|GO:0006886(intracellular protein transport)|GO:0009607(response to biotic stimulus)|GO:0014069(postsynaptic density)|GO:0016020(membrane)|GO:0016021(integral to membrane)|GO:0030054(cell junction)|GO:0031901(early endosome membrane)|GO:0035254(glutamate receptor binding)|GO:0042803(…	ATCTTTTAGCTTGTTTGCTTACGACTTTTCTTTCTGATGAATGGTGATGTTTGGACTCTG	79953	SYNDIG1	0
A_51_P263290	4.17606	2.75843e-06	Galnt9	UDP-N-acetyl-alpha-D-galactosamine:polypeptide N-acetylgalactosaminyltransferase 9	Mus musculus UDP-N-acetyl-alpha-D-galactosamine:polypeptide N-acetylgalactosaminyltransferase 9 (Galnt9), transcript variant A, mRNA [NM_198306]	NM_198306	NM_198306	231605	chr5	111050001	111050060	+	56564	20	34	A_51_P263290	FALSE	Mm.275748	ENSMUST00000040001		ref|NM_198306|ref|NM_001122639|ref|NR_104449|ens|ENSMUST00000040001	chr5:111050001-111050060	mm|5qF	GO:0003674(molecular_function)|GO:0005575(cellular_component)|GO:0008150(biological_process)	GCCACGCATGTGCTAAGTCCCTGTACATAACCCATATGGAAACAAACAGACTCAGCTATT	50614	GALNT9	0
A_55_P2036303	4.15366	7.52993e-05	Bdnf	brain derived neurotrophic factor	Mus musculus brain derived neurotrophic factor (Bdnf), transcript variant 1, mRNA [NM_007540]	NM_007540	NM_007540	12064	chr2	109566961	109567020	+	24391	118	92	A_55_P2036303	FALSE	Mm.1442			ref|NM_007540|ref|NM_001048139|ref|NM_001285422|ref|NM_001285416	chr2:109566961-109567020	mm|2qE3	GO:0001657(ureteric bud development)|GO:0001662(behavioral fear response)|GO:0005102(receptor binding)|GO:0005169(neurotrophin TRKB receptor binding)|GO:0005515(protein binding)|GO:0005576(extracellular region)|GO:0005615(extracellular space)|GO:0005623(cell)|GO:0005737(cytoplasm)|GO:0006120(mitochondrial electron transport, NADH to ubiquinone)|GO:0007169(transmembrane receptor protein tyrosine k…	GTAAATGTCTGTGGCCTTGTTCTCTCTATGGTAAAGATATTATTCACCATGTAAAACAAG	627	BDNF	0
A_52_P235448	4.1447	5.74562e-05	BC030500	cDNA sequence BC030500	Mus musculus cDNA sequence BC030500 (BC030500), mRNA [NM_173411]	NM_173411	NM_173411	234290	chr8	61392920	61392979	+	44234	58	93	A_52_P235448	FALSE	Mm.39244	ENSMUST00000062978		ref|NM_173411|ens|ENSMUST00000062978|ref|XM_006509391|ref|XM_006509390	chr8:061392920-061392979	mm|8qB3.1	GO:0003674(molecular_function)|GO:0005575(cellular_component)|GO:0008150(biological_process)	CCATGTACTAAGGGAGAGTTGTTTTGGAATAAATTAACTGTCACGAAAAACTGTTAGGAG			0
A_52_P278354	4.11504	5.17189e-06	Bmp7	bone morphogenetic protein 7	Mus musculus bone morphogenetic protein 7 (Bmp7), mRNA [NM_007557]	NM_007557	NM_007557	12162	chr2	172695262	172695203	-	30277	100	128	A_52_P278354	FALSE	Mm.595	ENSMUST00000009143		ref|NM_007557|ens|ENSMUST00000009143|gb|BC010771|gb|X56906	chr2:172695262-172695203	mm|2qH3	GO:0001503(ossification)|GO:0001654(eye development)|GO:0001657(ureteric bud development)|GO:0001707(mesoderm formation)|GO:0001822(kidney development)|GO:0005125(cytokine activity)|GO:0005160(transforming growth factor beta receptor binding)|GO:0005515(protein binding)|GO:0005576(extracellular region)|GO:0005615(extracellular space)|GO:0007275(multicellular organismal development)|GO:0007389(pat…	GCTGGCGTCTGTGTTGAAGGGAAACCAAGCAGAAGCCACTGTAATGATATGTCACAATAA	655	BMP7	0
A_51_P311038	4.0295	0.00255715	Adamts15	a disintegrin-like and metallopeptidase (reprolysin type) with thrombospondin type 1 motif, 15	Mus musculus a disintegrin-like and metallopeptidase (reprolysin type) with thrombospondin type 1 motif, 15 (Adamts15), mRNA [NM_001024139]	NM_001024139	NM_001024139	235130	chr9	30707092	30707033	-	41655	66	3	A_51_P311038	FALSE	Mm.65867	ENSMUST00000065112		ref|NM_001024139|ens|ENSMUST00000065112|ref|XM_006510214|ref|XM_006510212	chr9:030707092-030707033	mm|9qA4	GO:0004222(metalloendopeptidase activity)|GO:0005576(extracellular region)|GO:0005578(proteinaceous extracellular matrix)|GO:0006508(proteolysis)|GO:0008233(peptidase activity)|GO:0008237(metallopeptidase activity)|GO:0008270(zinc ion binding)|GO:0016787(hydrolase activity)|GO:0031012(extracellular matrix)|GO:0046872(metal ion binding)	GAGTATCTTCATTGGGTTATGGACCAGTAAGACTTTGGGTTAGGGATCCCCTAGTCTCTT	170689	ADAMTS15	0
A_51_P173162	3.92722	2.03316e-06	Edaradd	EDAR (ectodysplasin-A receptor)-associated death domain	Mus musculus EDAR (ectodysplasin-A receptor)-associated death domain (Edaradd), mRNA [NM_133643]	NM_133643	NM_133643	171211	chr13	12570133	12570074	-	36036	83	89	A_51_P173162	FALSE	Mm.159671	ENSMUST00000179308		ref|NM_133643|ens|ENSMUST00000179308|gb|AF358671|gb|AK041545	chr13:012570133-012570074	mm|13qA1	GO:0001942(hair follicle development)|GO:0005123(death receptor binding)|GO:0005515(protein binding)|GO:0005737(cytoplasm)|GO:0007165(signal transduction)|GO:0007249(I-kappaB kinase/NF-kappaB cascade)|GO:0007275(multicellular organismal development)|GO:0030154(cell differentiation)|GO:0042475(odontogenesis of dentin-containing tooth)|GO:0061153(trachea gland development)	GATCCCAAAATATCAATGTCTTTGGACATGTCCGCATACAGAATCCCATACAGAATCTCT	128178	EDARADD	0
A_55_P2156155	3.89043	0.00577518	Gadl1	glutamate decarboxylase-like 1	Mus musculus glutamate decarboxylase-like 1 (Gadl1), mRNA [NM_028638]	NM_028638	NM_028638	73748	chr9	115985235	115985294	+	8279	167	172	A_55_P2156155	FALSE	Mm.485018	ENSMUST00000069651		ref|NM_028638|ens|ENSMUST00000069651|tc|TC1653617	chr9:115985235-115985294	mm|9qF3	GO:0003824(catalytic activity)|GO:0004068(aspartate 1-decarboxylase activity)|GO:0004782(sulfinoalanine decarboxylase activity)|GO:0005575(cellular_component)|GO:0008150(biological_process)|GO:0016829(lyase activity)|GO:0016831(carboxy-lyase activity)|GO:0019752(carboxylic acid metabolic process)|GO:0030170(pyridoxal phosphate binding)	CTAAGACCGATGCTAGAAATAAGTTGGATTTCATGAAATAAAAAGCTCTGTCAGCACTGT	339896	GADL1	0
A_55_P2143581	3.88445	5.3568e-05	Stk26	serine/threonine kinase 26	Mus musculus serine/threonine kinase 26 (Stk26), mRNA [NM_133729]	NM_133729	NM_133729	70415	chrX	48244934	48244993	+	62421	2	128	A_55_P2143581	FALSE	Mm.391246	ENSMUST00000146956		ref|NM_133729|ens|ENSMUST00000146956|gb|AK029278|gb|AK034609	chrX:048244934-048244993	mm|XqA5	GO:0000139(Golgi membrane)|GO:0000166(nucleotide binding)|GO:0000287(magnesium ion binding)|GO:0004672(protein kinase activity)|GO:0004674(protein serine/threonine kinase activity)|GO:0005524(ATP binding)|GO:0005634(nucleus)|GO:0005654(nucleoplasm)|GO:0005737(cytoplasm)|GO:0005794(Golgi apparatus)|GO:0005798(Golgi-associated vesicle)|GO:0005813(centrosome)|GO:0005829(cytosol)|GO:0006468(protein p…	CCCCCACACAAGTATATTCTAAAAATGACTATTTGTAATGAGGTGGAAGTAAGTAATACC	51765	STK26	0
A_52_P165773	3.81811	3.48274e-06	Prmt8	protein arginine N-methyltransferase 8	Mus musculus protein arginine N-methyltransferase 8 (Prmt8), mRNA [NM_201371]	NM_201371	NM_201371	381813	chr6	127640674	127639914	-	55843	22	164	A_52_P165773	FALSE	Mm.39750	ENSMUST00000032500		ref|NM_201371|ens|ENSMUST00000032500|ref|XM_006506352|gb|BC060250	unmapped		GO:0000179(rRNA (adenine-N6,N6-)-dimethyltransferase activity)|GO:0003880(protein C-terminal carboxyl O-methyltransferase activity)|GO:0004809(tRNA (guanine-N2-)-methyltransferase activity)|GO:0005829(cytosol)|GO:0005886(plasma membrane)|GO:0006355(regulation of transcription, DNA-dependent)|GO:0006479(protein methylation)|GO:0008168(methyltransferase activity)|GO:0008169(C-methyltransferase acti…	AGGAAATCTACGGGACCATATCCATGAAGCCAAATGCCAAAAATGTGCGAGACCTCGATT	56341	PRMT8	0
A_55_P2315747	3.79656	0.000227996	4930571B16Rik	RIKEN cDNA 4930571B16 gene	Mus musculus adult male testis cDNA, RIKEN full-length enriched library, clone:4930571B16 product:SAM domain, SH3 domain and nuclear localisation signals, 1, full insert sequence. [AK016268]		AK016268	613117	chr17	55702746	55702805	+	57603	17	251	A_55_P2315747	FALSE	Mm.488109			gb|AK016268|gb|BB017853|riken|4930571B16|nap|NAP074692-1	chr17:55702746-55702805	mm|17qC		TGCTAGAAAGAGAGGTTGGAGTGTTAAGGAACCCTAATAAAAGTAGGTTTCCAAAGATCT			0
A_55_P2001078	3.79636	0.000404486	Mmel1	membrane metallo-endopeptidase-like 1	Mus musculus membrane metallo-endopeptidase-like 1 (Mmel1), mRNA [NM_013783]	NM_013783	NM_013783	27390	chr4	154269578	154269637	+	43856	59	193	A_55_P2001078	FALSE	Mm.116944	ENSMUST00000163732		ref|NM_013783|ens|ENSMUST00000163732|ens|ENSMUST00000080559|gb|AF157105	chr4:154269578-154269637	mm|4qE2	GO:0004222(metalloendopeptidase activity)|GO:0005576(extracellular region)|GO:0005615(extracellular space)|GO:0005783(endoplasmic reticulum)|GO:0005794(Golgi apparatus)|GO:0006508(proteolysis)|GO:0008233(peptidase activity)|GO:0008237(metallopeptidase activity)|GO:0008270(zinc ion binding)|GO:0016020(membrane)|GO:0016021(integral to membrane)|GO:0016787(hydrolase activity)|GO:0046872(metal ion bi…	TAGTGTGTGGCTAAATGTTCTCGAGCTTCAGACTTGAGCTAAGTAAACGCTTCAAAGAAG	79258	MMEL1	0
A_55_P1962279	3.77652	0.00169423	Plac1	placental specific protein 1	Mus musculus placental specific protein 1 (Plac1), mRNA [NM_019538]	NM_019538	NM_019538	56096	chrX	50423292	50423233	-	26608	111	250	A_55_P1962279	FALSE	Mm.274842	ENSMUST00000114843		ref|NM_019538|ens|ENSMUST00000114843|ens|ENSMUST00000074861|ref|XM_006541525	chrX:050423292-050423233	mm|XqA5	GO:0003674(molecular_function)|GO:0005575(cellular_component)|GO:0005576(extracellular region)|GO:0007275(multicellular organismal development)|GO:0090214(spongiotrophoblast layer developmental growth)	CATGATAGCTCTTTTAGGGGAATTTTGGAAAGGGTCAATTCATATATAGCTGATTGTAAC	10761	PLAC1	0
A_55_P1962756	3.64983	2.42059e-05	Ttll2	tubulin tyrosine ligase-like family, member 2	Mus musculus tubulin tyrosine ligase-like family, member 2 (Ttll2), mRNA [NM_001098267]	NM_001098267	NM_001098267	100216474	chr17	7555314	7555255	-	28149	107	119	A_55_P1962756	FALSE	Mm.477432	ENSMUST00000115747		ref|NM_001098267|ref|NR_024558|ens|ENSMUST00000115747|ref|XM_011246173	chr17:007555314-007555255	mm|17qA1	GO:0003674(molecular_function)|GO:0005575(cellular_component)|GO:0006464(cellular protein modification process)|GO:0008150(biological_process)|GO:0016874(ligase activity)	CCAGGAATGGGTTAAATGTCAAAAGAATCATTCAAGAGCTCCAGAAGCTAATGAATAAAT	83887	TTLL2	0
A_51_P283499	3.57855	2.32778e-09	Drd4	dopamine receptor D4	Mus musculus dopamine receptor D4 (Drd4), mRNA [NM_007878]	NM_007878	NM_007878	13491	chr7	148480683	148480742	+	61506	5	317	A_51_P283499	FALSE	Mm.41075	ENSMUST00000026569		ref|NM_007878|ens|ENSMUST00000026569|gb|AK044379|gb|BC016086	chr7:148480683-148480742	mm|7qF5	GO:0000187(activation of MAPK activity)|GO:0001591(dopamine receptor activity, coupled via Gi/Go)|GO:0001662(behavioral fear response)|GO:0001963(synaptic transmission, dopaminergic)|GO:0001975(response to amphetamine)|GO:0004871(signal transducer activity)|GO:0004930(G-protein coupled receptor activity)|GO:0004952(dopamine receptor activity)|GO:0005737(cytoplasm)|GO:0005886(plasma membrane)|GO:0…	CTCAACCCCATCATCTACACCATCTTCAACGCGGAGTTTCGAAGTGTCTTCCGCAAGACT	1815	DRD4	0
A_55_P1973818	3.55626	0.000389488	Mmel1	membrane metallo-endopeptidase-like 1	Mus musculus membrane metallo-endopeptidase-like 1 (Mmel1), mRNA [NM_013783]	NM_013783	NM_013783	27390	chr4	154269571	154269630	+	48439	45	211	A_55_P1973818	FALSE	Mm.116944	ENSMUST00000080559		ref|NM_013783|ens|ENSMUST00000080559|ens|ENSMUST00000079269|ens|ENSMUST00000105634	chr4:154269571-154269630	mm|4qE2	GO:0004222(metalloendopeptidase activity)|GO:0005576(extracellular region)|GO:0005615(extracellular space)|GO:0005783(endoplasmic reticulum)|GO:0005794(Golgi apparatus)|GO:0006508(proteolysis)|GO:0008233(peptidase activity)|GO:0008237(metallopeptidase activity)|GO:0008270(zinc ion binding)|GO:0016020(membrane)|GO:0016021(integral to membrane)|GO:0016787(hydrolase activity)|GO:0046872(metal ion bi…	CTCTCCATAGTGTGTGGCTAAATGTTCTCGAGCTTCAGACTTGAGCTAAGTAAACGCTTC	79258	MMEL1	0
A_51_P376445	3.55079	1.246e-05	Rhox5	reproductive homeobox 5	Mus musculus reproductive homeobox 5 (Rhox5), mRNA [NM_008818]	NM_008818	NM_008818	18617	unmapped	-1	-1		54976	25	257	A_51_P376445	FALSE	Mm.423066	ENSMUST00000184866		ref|NM_008818|ens|ENSMUST00000184866|ens|ENSMUST00000185127|gb|AK146449	unmapped		GO:0000122(negative regulation of transcription from RNA polymerase II promoter)|GO:0003677(DNA binding)|GO:0005515(protein binding)|GO:0005634(nucleus)|GO:0005737(cytoplasm)|GO:0030317(sperm motility)|GO:0035234(germ cell programmed cell death)	TGGAGTGAGATGGGGAGAAAGATGCCCTTTTGCGACACCGAGATTTTGATTTGATCACAT			0
A_51_P470851	3.53832	0.000263204	Cplx3	complexin 3	Mus musculus complexin 3 (Cplx3), mRNA [NM_146223]	NM_146223	NM_146223	235415	chr9	57449699	57449640	-	46183	52	131	A_51_P470851	FALSE	Mm.35242	ENSMUST00000045068		ref|NM_146223|ens|ENSMUST00000045068|gb|AK044211|gb|BC017128	chr9:057449699-057449640	mm|9qB	GO:0000149(SNARE binding)|GO:0005326(neurotransmitter transporter activity)|GO:0005623(cell)|GO:0005634(nucleus)|GO:0005829(cytosol)|GO:0005886(plasma membrane)|GO:0006810(transport)|GO:0006836(neurotransmitter transport)|GO:0006887(exocytosis)|GO:0016020(membrane)|GO:0016079(synaptic vesicle exocytosis)|GO:0019905(syntaxin binding)|GO:0030054(cell junction)|GO:0030073(insulin secretion)|GO:00452…	GACACAGAAGCCCTGGCTCATTTGCCACAGATGCATCCTGGCACACACAGACACACGTCT	594855	CPLX3	0
A_55_P2414159	3.53462	0.000188807	Vwa2	von Willebrand factor A domain containing 2	Mus musculus von Willebrand factor A domain containing 2 (Vwa2), mRNA [NM_172840]	NM_172840	NM_172840	240675	chr19	56986274	56986333	+	8135	168	131	A_55_P2414159	FALSE	Mm.129534	ENSMUST00000026068		ref|NM_172840|ens|ENSMUST00000026068|ref|XM_006527091|ref|XM_006527090	chr19:056986274-056986333	mm|19qD2	GO:0005576(extracellular region)|GO:0005604(basement membrane)|GO:0005615(extracellular space)|GO:0007161(calcium-independent cell-matrix adhesion)|GO:0042802(identical protein binding)|GO:0046626(regulation of insulin receptor signaling pathway)|GO:0051260(protein homooligomerization)|GO:0070062(extracellular vesicular exosome)	GACCCACATTTTCTTCCTTCACATTTATACACTGGGGATGTAAACTTTACGTATTGTTAT	340706	VWA2	0
A_55_P1999389	3.50554	8.16764e-06	1500009C09Rik	RIKEN cDNA 1500009C09 gene	Mus musculus RIKEN cDNA 1500009C09 gene (1500009C09Rik), transcript variant 2, long non-coding RNA [NR_037697]	NR_037697	NR_037697	76505	chr15	82091121	82091180	+	6978	171	150	A_55_P1999389	FALSE	Mm.23023			ref|NR_037697|ref|NR_037698|gb|BC023061|tc|TC1598764	chr15:82091121-82091180	mm|15qE1	GO:0003674(molecular_function)|GO:0005575(cellular_component)|GO:0008150(biological_process)	TCCTGCTGCGGCTTCACTTGTGCAACGCTAATAAAGGTTCTATGGCCACCTTTGCAGACC			0
A_55_P2075041	3.50155	2.09749e-05	4932411E22Rik	RIKEN cDNA 4932411E22 gene	Mus musculus RIKEN cDNA 4932411E22 gene (4932411E22Rik), mRNA [NM_172534]	NM_172534	NM_172534	214604	chr11	89251600	89251541	-	22140	125	2	A_55_P2075041	FALSE	Mm.60997	ENSMUST00000050983		ref|NM_172534|ens|ENSMUST00000050983|gb|AK029964|tc|TC1592792	chr11:089251600-089251541	mm|11qC	GO:0003674(molecular_function)|GO:0005575(cellular_component)|GO:0008150(biological_process)	CGCTCAGCAAATTCTGACTTACTAAACCCAACCACATTAAATAAAAACCTACTCATTCAT			0
A_55_P1971009	3.48171	0.011434	Gzme	granzyme E	Mus musculus granzyme E (Gzme), mRNA [NM_010373]	NM_010373	NM_010373	14942	chr14	56736515	56736456	-	21222	128	197	A_55_P1971009	FALSE	Mm.14424	ENSMUST00000089549		ref|NM_010373|ens|ENSMUST00000089549|gb|X12821|tc|TC1586995	chr14:056736515-056736456	mm|14qC3	GO:0004252(serine-type endopeptidase activity)|GO:0005737(cytoplasm)|GO:0006508(proteolysis)|GO:0006955(immune response)|GO:0008233(peptidase activity)|GO:0008236(serine-type peptidase activity)|GO:0008626(induction of apoptosis by granzyme)|GO:0016020(membrane)|GO:0016485(protein processing)|GO:0016787(hydrolase activity)|GO:0019835(cytolysis)|GO:0043231(intracellular membrane-bounded organelle)	AGAACCACGTGGAGTGGGCAGCAAAGAATGAAAATTCACAATAAATAACCTCCAGACTGC	2999	GZMH	0
A_55_P2124871	3.47205	1.84591e-06	Npw	neuropeptide W	Mus musculus neuropeptide W (Npw), mRNA [NM_001099664]	NM_001099664	NM_001099664	381073	chr17	24794334	24794275	-	51919	34	140	A_55_P2124871	FALSE	Mm.291772	ENSMUST00000095544		ref|NM_001099664|ens|ENSMUST00000095544|gb|AK131881|tc|TC1715348	chr17:024794334-024794275	mm|17qA3.3	GO:0001664(G-protein coupled receptor binding)|GO:0005575(cellular_component)|GO:0007186(G-protein coupled receptor signaling pathway)|GO:0007631(feeding behavior)	AGCTTGAAGCTCCAGTCAGGCCTCGTGGTCTGGTCAATAAAACCAACCTGATTCCTGCGC	283869	NPW	0
A_51_P104392	3.45238	0.00128445	Rpp25	ribonuclease P/MRP 25 subunit	Mus musculus ribonuclease P/MRP 25 subunit (Rpp25), mRNA [NM_133982]	NM_133982	NM_133982	102614	chr9	57353026	57353085	+	50851	37	308	A_51_P104392	FALSE	Mm.274421	ENSMUST00000080514		ref|NM_133982|ens|ENSMUST00000080514|gb|AK140177|gb|BC016085	chr9:057353026-057353085	mm|9qB	GO:0003676(nucleic acid binding)|GO:0003723(RNA binding)|GO:0004526(ribonuclease P activity)|GO:0005634(nucleus)|GO:0005654(nucleoplasm)|GO:0005815(microtubule organizing center)|GO:0008033(tRNA processing)|GO:0008150(biological_process)|GO:0016787(hydrolase activity)	TAACTGAGAGCGGGAGCTACGGAGCTGATTACTTGAGGATGGCCAAGTTGAAAATGTCCG	54913	RPP25	0
A_51_P424471	3.41456	7.16812e-06	Cnih3	cornichon homolog 3 (Drosophila)	Mus musculus cornichon homolog 3 (Drosophila) (Cnih3), transcript variant 1, mRNA [NM_028408]	NM_028408	NM_028408	72978	chr1	183389705	183389764	+	21870	126	213	A_51_P424471	FALSE	Mm.338083	ENSMUST00000161880		ref|NM_028408|ref|NM_001160211|ref|NM_001160212|ens|ENSMUST00000161880	chr1:183389705-183389764	mm|1qH5	GO:0005886(plasma membrane)|GO:0016020(membrane)|GO:0016021(integral to membrane)|GO:0016247(channel regulator activity)|GO:0030054(cell junction)|GO:0032281(alpha-amino-3-hydroxy-5-methyl-4-isoxazolepropionic acid selective glutamate receptor complex)|GO:0035249(synaptic transmission, glutamatergic)|GO:0035556(intracellular signal transduction)|GO:0042391(regulation of membrane potential)|GO:004…	TCGTCTGGATGGTAGAAATGAGGCCAGATGCTGGCAGGTGTCGAACAAGGGACAGAATGG	149111	CNIH3	0
A_51_P199168	3.39959	0.00677351	Cidea	cell death-inducing DNA fragmentation factor, alpha subunit-like effector A	Mus musculus cell death-inducing DNA fragmentation factor, alpha subunit-like effector A (Cidea), mRNA [NM_007702]	NM_007702	NM_007702	12683	chr18	67527351	67527410	+	8049	168	303	A_51_P199168	FALSE	Mm.449	ENSMUST00000025404		ref|NM_007702|ens|ENSMUST00000025404|gb|AF041376|gb|BC096649	chr18:067527351-067527410	mm|18qE1	GO:0001659(temperature homeostasis)|GO:0005515(protein binding)|GO:0005622(intracellular)|GO:0005634(nucleus)|GO:0005737(cytoplasm)|GO:0005739(mitochondrion)|GO:0005740(mitochondrial envelope)|GO:0005811(lipid particle)|GO:0006351(transcription, DNA-dependent)|GO:0006355(regulation of transcription, DNA-dependent)|GO:0006629(lipid metabolic process)|GO:0006915(apoptotic process)|GO:0008219(cell d…	CGGAGTGTGTGGGAACTGCGTGGATACGAATCAGTTTCTTTGGATCCTTACATACTGTAA	1149	CIDEA	0
A_52_P266686	3.38955	0.000258801	Ntsr2	neurotensin receptor 2	Mus musculus neurotensin receptor 2 (Ntsr2), mRNA [NM_008747]	NM_008747	NM_008747	18217	chr12	16666797	16666856	+	36519	81	108	A_52_P266686	FALSE	Mm.281715	ENSMUST00000111064		ref|NM_008747|ens|ENSMUST00000111064|ref|XM_006515011|ref|XM_006515012	chr12:016666797-016666856	mm|12qA1.1	GO:0004871(signal transducer activity)|GO:0004930(G-protein coupled receptor activity)|GO:0005802(trans-Golgi network)|GO:0005886(plasma membrane)|GO:0007165(signal transduction)|GO:0007186(G-protein coupled receptor signaling pathway)|GO:0007200(phospholipase C-activating G-protein coupled receptor signaling pathway)|GO:0007218(neuropeptide signaling pathway)|GO:0007268(synaptic transmission)|GO…	TTGGGACACACCCATCAGATAAGCCATGCCATTACTAACAGTCTAAGCGGACCTACTGAC	23620	NTSR2	0
A_55_P2005833	3.38914	0.00422058	Adamts8	a disintegrin-like and metallopeptidase (reprolysin type) with thrombospondin type 1 motif, 8	Mus musculus a disintegrin-like and metallopeptidase (reprolysin type) with thrombospondin type 1 motif, 8 (Adamts8), mRNA [NM_013906]	NM_013906	NM_013906	30806	chr9	30770384	30770443	+	56714	20	61	A_55_P2005833	FALSE	Mm.100582	ENSMUST00000163037		ref|NM_013906|ens|ENSMUST00000163037|ens|ENSMUST00000068135|gb|AK043875	chr9:030770384-030770443	mm|9qA4	GO:0004222(metalloendopeptidase activity)|GO:0005576(extracellular region)|GO:0005578(proteinaceous extracellular matrix)|GO:0006508(proteolysis)|GO:0008201(heparin binding)|GO:0008233(peptidase activity)|GO:0008237(metallopeptidase activity)|GO:0008270(zinc ion binding)|GO:0016787(hydrolase activity)|GO:0031012(extracellular matrix)|GO:0046872(metal ion binding)	ACCCATTTCAAGTATTTATGCAAATATGTCTCCGAACTAAAGTGTGATCTTACACCAATG	11095	ADAMTS8	0
A_55_P1988872	3.32786	4.98097e-06	Bcl11a	B cell CLL/lymphoma 11A (zinc finger protein)	Mus musculus B cell CLL/lymphoma 11A (zinc finger protein) (Bcl11a), transcript variant 4, mRNA [NM_001242934]	NM_001242934	NM_001242934	14025	chr11	24068355	24068414	+	60924	7	169	A_55_P1988872	FALSE	Mm.53687			ref|NM_001242934|ref|XM_011243661|ref|XM_006514504|ref|XM_011243660	chr11:024068355-024068414	mm|11qA3.2	GO:0000122(negative regulation of transcription from RNA polymerase II promoter)|GO:0000978(RNA polymerase II core promoter proximal region sequence-specific DNA binding)|GO:0001078(RNA polymerase II core promoter proximal region sequence-specific DNA binding transcription factor activity involved in negative regulation of transcription)|GO:0003676(nucleic acid binding)|GO:0003714(transcription c…	TTTTGGCAGTTGTCTGCATTAACCTGTTCATACACCCATTTTGTCCCTTTATTGAAAAAA	53335	BCL11A	0
A_52_P648601	3.30953	3.56141e-05	Dusp9	dual specificity phosphatase 9	Mus musculus dual specificity phosphatase 9 (Dusp9), mRNA [NM_029352]	NM_029352	NM_029352	75590	chrX	70888467	70888526	+	5043	177	84	A_52_P648601	FALSE	Mm.16479	ENSMUST00000019701		ref|NM_029352|ens|ENSMUST00000019701|ref|XM_006528331|ref|XM_006528332	chrX:070888467-070888526	mm|XqA7.3	GO:0000188(inactivation of MAPK activity)|GO:0005737(cytoplasm)|GO:0006470(protein dephosphorylation)|GO:0016311(dephosphorylation)|GO:0017017(MAP kinase tyrosine/serine/threonine phosphatase activity)	CACTGAGACTCTTTGTGACTGAGGGTGGTCAAACTGCCACCGGAGGAGATAGGGTCTCAG	1852	DUSP9	0
A_51_P433870	3.30707	0.0234644	Vegfc	vascular endothelial growth factor C	Mus musculus vascular endothelial growth factor C (Vegfc), mRNA [NM_009506]	NM_009506	NM_009506	22341	chr8	55271533	55271592	+	34187	88	180	A_51_P433870	FALSE	Mm.1402	ENSMUST00000033919		ref|NM_009506|ens|ENSMUST00000033919|gb|BC096377|gb|U73620	chr8:055271533-055271592	mm|8qB1.3	GO:0001525(angiogenesis)|GO:0001954(positive regulation of cell-matrix adhesion)|GO:0002052(positive regulation of neuroblast proliferation)|GO:0005515(protein binding)|GO:0005576(extracellular region)|GO:0005615(extracellular space)|GO:0007275(multicellular organismal development)|GO:0008083(growth factor activity)|GO:0008284(positive regulation of cell proliferation)|GO:0008285(negative regulat…	TCTGTGTTTATTGAACCATGTGGATTACTGCGGGAGAGGACTGGCACTCATGTGCAAAAA	7424	VEGFC	0
A_55_P1980481	3.30601	0.000813146	Grin2a	glutamate receptor, ionotropic, NMDA2A (epsilon 1)	Mus musculus glutamate receptor, ionotropic, NMDA2A (epsilon 1) (Grin2a), mRNA [NM_008170]	NM_008170	NM_008170	14811	chr16	9577862	9577803	-	57681	17	95	A_55_P1980481	FALSE	Mm.2953	ENSMUST00000115835		ref|NM_008170|ens|ENSMUST00000115835|gb|D10217|tc|TC1715036	chr16:009577862-009577803	mm|16qA1	GO:0001508(regulation of action potential)|GO:0001964(startle response)|GO:0001975(response to amphetamine)|GO:0004872(receptor activity)|GO:0004970(ionotropic glutamate receptor activity)|GO:0004972(N-methyl-D-aspartate selective glutamate receptor activity)|GO:0005102(receptor binding)|GO:0005216(ion channel activity)|GO:0005234(extracellular-glutamate-gated ion channel activity)|GO:0005261(cat…	GGTAAACGTTGGATGTCCAATAGCACCCTACTAGGAGGAAGAGGATATAGGGAGGTATTT	2903	GRIN2A	0
A_52_P221776	3.29393	0.00339714	Kif12	kinesin family member 12	Mus musculus kinesin family member 12 (Kif12), mRNA [NM_010616]	NM_010616	NM_010616	16552	chr4	62826770	62826711	-	1058	189	182	A_52_P221776	FALSE	Mm.216057	ENSMUST00000030042		ref|NM_010616|ens|ENSMUST00000030042|ens|ENSMUST00000131760|ref|XM_011249938	chr4:062826770-062826711	mm|4qB3	GO:0000166(nucleotide binding)|GO:0003777(microtubule motor activity)|GO:0005524(ATP binding)|GO:0005737(cytoplasm)|GO:0005856(cytoskeleton)|GO:0005871(kinesin complex)|GO:0005874(microtubule)|GO:0007018(microtubule-based movement)|GO:0008017(microtubule binding)|GO:0016887(ATPase activity)|GO:0070062(extracellular vesicular exosome)	GAGGTACAGGGACCCTGACCCTAGACCTTGAACCTGAGTCTCGGTTCACAATATGCTGGC	113220	KIF12	0
A_55_P1998456	3.2177	0.00401267	Birc7	baculoviral IAP repeat-containing 7 (livin)	Mus musculus baculoviral IAP repeat-containing 7 (livin) (Birc7), mRNA [NM_001163247]	NM_001163247	NM_001163247	329581	chr2	180667976	180668035	+	13229	152	112	A_55_P1998456	FALSE	Mm.187879	ENSMUST00000137859		ref|NM_001163247|ens|ENSMUST00000137859|gb|AK053463|ens|ENSMUST00000108875	chr2:180667976-180668035	mm|2qH4	GO:0004842(ubiquitin-protein ligase activity)|GO:0004869(cysteine-type endopeptidase inhibitor activity)|GO:0005634(nucleus)|GO:0005737(cytoplasm)|GO:0005794(Golgi apparatus)|GO:0006915(apoptotic process)|GO:0008270(zinc ion binding)|GO:0008766(UDP-N-acetylmuramoylalanyl-D-glutamyl-2,6-diaminopimelate-D-alanyl-D-alanine ligase activity)|GO:0009966(regulation of signal transduction)|GO:0010466(neg…	CAGCTGTGCCCTATCTGCAGGGTGCCTATCTGTAGCTGTGTACGCACATTCCTGTCCTAA	79444	BIRC7	0
A_55_P2247285	3.20402	0.00037051	Edaradd	EDAR (ectodysplasin-A receptor)-associated death domain	Mus musculus EDAR (ectodysplasin-A receptor)-associated death domain (Edaradd), mRNA [NM_133643]	NM_133643	NM_133643	171211	chr13	12565879	12565820	-	52885	31	176	A_55_P2247285	FALSE	Mm.159671	ENSMUST00000179308		ref|NM_133643|ens|ENSMUST00000179308|ref|XM_006516564|gb|AK162653	chr13:012565879-012565820	mm|13qA1	GO:0001942(hair follicle development)|GO:0005123(death receptor binding)|GO:0005515(protein binding)|GO:0005737(cytoplasm)|GO:0007165(signal transduction)|GO:0007249(I-kappaB kinase/NF-kappaB cascade)|GO:0007275(multicellular organismal development)|GO:0030154(cell differentiation)|GO:0042475(odontogenesis of dentin-containing tooth)|GO:0061153(trachea gland development)	TAAGGCAGTTAAGCAGATCTCATTTGGTTTTGAGCAAAGACTTTCCCCCAGGTCTTTTTT	128178	EDARADD	0
A_51_P520849	3.16516	0.00296662	Sfrp2	secreted frizzled-related protein 2	Mus musculus secreted frizzled-related protein 2 (Sfrp2), mRNA [NM_009144]	NM_009144	NM_009144	20319	chr3	83577864	83577923	+	59942	10	165	A_51_P520849	FALSE	Mm.19155	ENSMUST00000029625		ref|NM_009144|ens|ENSMUST00000029625|gb|D50462|gb|AK147091	chr3:083577864-083577923	mm|3qE3	GO:0001569(patterning of blood vessels)|GO:0001756(somitogenesis)|GO:0001843(neural tube closure)|GO:0002063(chondrocyte development)|GO:0003151(outflow tract morphogenesis)|GO:0003214(cardiac left ventricle morphogenesis)|GO:0005515(protein binding)|GO:0005576(extracellular region)|GO:0005615(extracellular space)|GO:0006915(apoptotic process)|GO:0007165(signal transduction)|GO:0007275(multicellu…	TCGGCATCTAAGTCTTCAAACATTTCGTTGCTCGTTTTATGCCCTCATGAGCTCTGACCA	6423	SFRP2	0
A_51_P259118	3.16273	0.000184967	Klhl1	kelch-like 1	Mus musculus kelch-like 1 (Klhl1), mRNA [NM_053105]	NM_053105	NM_053105	93688	chr14	96505593	96505534	-	60912	7	193	A_51_P259118	FALSE	Mm.308735	ENSMUST00000022666		ref|NM_053105|ens|ENSMUST00000022666|gb|AK220397|gb|AK031932	chr14:096505593-096505534	mm|14qE2.1	GO:0003779(actin binding)|GO:0005737(cytoplasm)|GO:0005856(cytoskeleton)|GO:0007626(locomotory behavior)|GO:0007628(adult walking behavior)|GO:0016358(dendrite development)|GO:0021680(cerebellar Purkinje cell layer development)|GO:0030425(dendrite)|GO:0043025(neuronal cell body)	CAGGTGCCTGTGTGGTTGTCATCAAGCAACCTTGACTGATTTATATAATGTTTGAAGGGA	57626	KLHL1	0
A_52_P95294	3.11918	0.00147321	Tcerg1l	transcription elongation regulator 1-like	Mus musculus transcription elongation regulator 1-like (Tcerg1l), mRNA [NM_183289]	NM_183289	NM_183289	70571	chr7	145400937	145400878	-	5032	177	106	A_52_P95294	FALSE	Mm.334297	ENSMUST00000160436		ref|NM_183289|ens|ENSMUST00000160436|tc|TC1685221|nap|NAP037629-1	chr7:145400937-145400878	mm|7qF4	GO:0003674(molecular_function)|GO:0005575(cellular_component)|GO:0008150(biological_process)	TATTCATCACAGTGACAACCGGACATTTGACACCCTTGTGAATCGTGATCACTTGCAGGT	256536	TCERG1L	0
A_55_P2012439	3.09754	0.000180621	Tnfrsf19	tumor necrosis factor receptor superfamily, member 19	Mus musculus tumor necrosis factor receptor superfamily, member 19 (Tnfrsf19), transcript variant 1, mRNA [NM_013869]	NM_013869	NM_013869	29820	chr14	61582932	61582873	-	15615	145	259	A_55_P2012439	FALSE	Mm.281356	ENSMUST00000111234		ref|NM_013869|ref|NM_001164155|ens|ENSMUST00000111234|ens|ENSMUST00000111236	chr14:061582932-061582873	mm|14qD1	GO:0001942(hair follicle development)|GO:0005576(extracellular region)|GO:0005886(plasma membrane)|GO:0016020(membrane)|GO:0016021(integral to membrane)|GO:0043123(positive regulation of I-kappaB kinase/NF-kappaB cascade)	ATGGAATATATTTTGAATCGCAGGATTTTCTACTCTAAAGAGTGCTGCTGTCTGTGTTAG	55504	TNFRSF19	0
A_55_P2133706	3.09424	1.62462e-06	Susd5	sushi domain containing 5	Mus musculus sushi domain containing 5 (Susd5), mRNA [NM_001101510]	NM_001101510	NM_001101510	382111	chr9	114007786	114007845	+	59590	11	213	A_55_P2133706	FALSE	Mm.376140	ENSMUST00000135338		ref|NM_001101510|ens|ENSMUST00000135338|gb|AK132299|riken|3930402D03	chr9:114007786-114007845	mm|9qF3	GO:0003674(molecular_function)|GO:0005575(cellular_component)|GO:0007219(Notch signaling pathway)	GGGGGTTTCATTAATACAGAGCTTCTGATATATCTAAAATAAAGTTATTTCCCCCAACAC	26032	SUSD5	0
A_51_P108266	3.08678	6.12985e-06	Actn2	actinin alpha 2	Mus musculus actinin alpha 2 (Actn2), mRNA [NM_033268]	NM_033268	NM_033268	11472	chr13	12367362	12364990	-	13033	153	175	A_51_P108266	FALSE	Mm.37638	ENSMUST00000168193		ref|NM_033268|ens|ENSMUST00000168193|ens|ENSMUST00000064204|ref|XM_011244263	unmapped		GO:0003779(actin binding)|GO:0005509(calcium ion binding)|GO:0005515(protein binding)|GO:0005737(cytoplasm)|GO:0005865(striated muscle thin filament)|GO:0005925(focal adhesion)|GO:0006936(muscle contraction)|GO:0008092(cytoskeletal protein binding)|GO:0030017(sarcomere)|GO:0030018(Z disc)|GO:0030035(microspike assembly)|GO:0030175(filopodium)|GO:0030274(LIM domain binding)|GO:0030374(ligand-depen…	TTCAACCACTTTGACAGGAGAAAGAACGGCCTGATGGATCATGAGGATTTCAGAGCCTGC	88	ACTN2	0
A_55_P1999532	3.08133	0.00336014	Col9a1	collagen, type IX, alpha 1	Mus musculus collagen, type IX, alpha 1 (Col9a1), transcript variant 1, mRNA [NM_007740]	NM_007740	NM_007740	12839	chr1	24259125	24259184	+	58978	13	125	A_55_P1999532	FALSE	Mm.154662	ENSMUST00000054588		ref|NM_007740|ref|NM_001290691|ens|ENSMUST00000054588|gb|AK031071	chr1:024259125-024259184	mm|1qA5	GO:0001894(tissue homeostasis)|GO:0003417(growth plate cartilage development)|GO:0005576(extracellular region)|GO:0005578(proteinaceous extracellular matrix)|GO:0005581(collagen)|GO:0005594(collagen type IX)|GO:0046872(metal ion binding)|GO:0051216(cartilage development)	ATTGCTAGGATACTAAGGAACAGACCCCACTACATTCAATAAAATTGGTGCTTAAAATCT	1297	COL9A1	0
A_51_P209327	3.07781	0.00473935	Apln	apelin	Mus musculus apelin (Apln), mRNA [NM_013912]	NM_013912	NM_013912	30878	chrX	45378652	45378593	-	53181	30	240	A_51_P209327	FALSE	Mm.29262	ENSMUST00000039026		ref|NM_013912|ens|ENSMUST00000039026|gb|AK020057|gb|BC020015	chrX:045378652-045378593	mm|XqA4	GO:0001664(G-protein coupled receptor binding)|GO:0002026(regulation of the force of heart contraction)|GO:0005102(receptor binding)|GO:0005179(hormone activity)|GO:0005615(extracellular space)|GO:0007165(signal transduction)|GO:0007186(G-protein coupled receptor signaling pathway)|GO:0007631(feeding behavior)|GO:0008284(positive regulation of cell proliferation)|GO:0031652(positive regulation of…	GTCCTTTGGCATCTGTTCGAATGTCCTCATTTTTCTGGCAGTGTCACTTAAAGGATTTTT	8862	APLN	0
A_52_P538363	3.06851	1.06294e-05	Pcdhb2	protocadherin beta 2	Mus musculus protocadherin beta 2 (Pcdhb2), mRNA [NM_053127]	NM_053127	NM_053127	93873	chr18	37456962	37457021	+	57160	18	154	A_52_P538363	FALSE	Mm.197508	ENSMUST00000056522		ref|NM_053127|ens|ENSMUST00000056522|gb|AY013781|gb|BC141154	chr18:037456962-037457021	mm|18qB3	GO:0003674(molecular_function)	TCCTTCAGAGTTCAGAGACAGAGAATGATACAAACCCTAGTTACAGGAATAGTTTTGAAT			0
A_66_P108965	3.05538	0.0217909	Smpdl3b	sphingomyelin phosphodiesterase, acid-like 3B	Mus musculus sphingomyelin phosphodiesterase, acid-like 3B (Smpdl3b), mRNA [NM_133888]	NM_133888	NM_133888	100340	chr4	132289286	132289227	-	26903	110	316	A_66_P108965	FALSE	Mm.287187	ENSMUST00000030709		ref|NM_133888|ens|ENSMUST00000030709|gb|AK154599|gb|AK004242	chr4:132289286-132289227	mm|4qD2.3	GO:0003674(molecular_function)|GO:0004112(cyclic-nucleotide phosphodiesterase activity)|GO:0004115(3',5'-cyclic-AMP phosphodiesterase activity)|GO:0004117(calmodulin-dependent cyclic-nucleotide phosphodiesterase activity)|GO:0004118(cGMP-stimulated cyclic-nucleotide phosphodiesterase activity)|GO:0004119(cGMP-inhibited cyclic-nucleotide phosphodiesterase activity)|GO:0004120(photoreceptor cyclic-…	CACTGACTTGGTTCATCTTTCTCCTGGTAAAATTGGGCAACGTTACCCAATGGAGAGAGA	27293	SMPDL3B	0
A_66_P128199	3.05146	0.000100895	Fzd5	frizzled homolog 5 (Drosophila)	Mus musculus frizzled homolog 5 (Drosophila) (Fzd5), transcript variant 1, mRNA [NM_022721]	NM_022721	NM_022721	14367	chr1	64779538	64779479	-	53906	28	102	A_66_P128199	FALSE	Mm.150813	ENSMUST00000063982		ref|NM_022721|ref|NM_001042659|ens|ENSMUST00000063982|gb|AK149545	chr1:064779538-064779479	mm|1qC2	GO:0000578(embryonic axis specification)|GO:0001525(angiogenesis)|GO:0001944(vasculature development)|GO:0002726(positive regulation of T cell cytokine production)|GO:0004871(signal transducer activity)|GO:0004888(transmembrane signaling receptor activity)|GO:0004930(G-protein coupled receptor activity)|GO:0005515(protein binding)|GO:0005769(early endosome)|GO:0005794(Golgi apparatus)|GO:0005886(…	AATTTCAGTGGCTTCCACAAGACCTTGTACACCTAGATGCAGGACTCTGTGAAGGTCTTA	7855	FZD5	0
A_52_P450934	3.01889	0.000106685	Paqr9	progestin and adipoQ receptor family member IX	Mus musculus progestin and adipoQ receptor family member IX (Paqr9), mRNA [NM_198414]	NM_198414	NM_198414	75552	chr9	95462405	95462464	+	60693	7	304	A_52_P450934	FALSE	Mm.151485			ref|NM_198414|gb|AK006159|gb|AY424298|tc|TC1580607	chr9:095462405-095462464	mm|9qE3.3	GO:0004872(receptor activity)|GO:0005575(cellular_component)|GO:0008150(biological_process)|GO:0016020(membrane)|GO:0016021(integral to membrane)	TCTGATTCTTTCCTCTCTACTTACTTAAGTTGCCACTAAAATAAATGTGCCTTTTGAAGC	344838	PAQR9	0
A_52_P627085	3.01751	0.00982103	Fam175a	family with sequence similarity 175, member A	Mus musculus family with sequence similarity 175, member A (Fam175a), mRNA [NM_172405]	NM_172405	NM_172405	70681	chr5	101234934	101234875	-	38965	74	135	A_52_P627085	FALSE	Mm.486560	ENSMUST00000044535		ref|NM_172405|ens|ENSMUST00000044535|ens|ENSMUST00000055245|ref|XM_006535217	chr5:101234934-101234875	mm|5qE4	GO:0005634(nucleus)|GO:0006281(DNA repair)|GO:0006302(double-strand break repair)|GO:0006974(response to DNA damage stimulus)|GO:0010212(response to ionizing radiation)|GO:0016568(chromatin modification)|GO:0031572(G2/M transition DNA damage checkpoint)|GO:0031593(polyubiquitin binding)|GO:0045739(positive regulation of DNA repair)|GO:0070531(BRCA1-A complex)	ACTGCTTATAATATATAGGTAAGTTAATATTTTATACAGTATCTTAATTCTTACTTATAT	84142	FAM175A	0
A_55_P2275249	3.00076	0.00158212	Th	tyrosine hydroxylase	Mus musculus tyrosine hydroxylase (Th), mRNA [NM_009377]	NM_009377	NM_009377	21823	chr7	150078762	150078703	-	17074	140	294	A_55_P2275249	FALSE	Mm.1292	ENSMUST00000000219		ref|NM_009377|ens|ENSMUST00000000219|gb|AK139568|gb|M69200	chr7:150078762-150078703	mm|7qF5	GO:0001666(response to hypoxia)|GO:0001963(synaptic transmission, dopaminergic)|GO:0004497(monooxygenase activity)|GO:0004511(tyrosine 3-monooxygenase activity)|GO:0005506(iron ion binding)|GO:0005634(nucleus)|GO:0005737(cytoplasm)|GO:0005739(mitochondrion)|GO:0005790(smooth endoplasmic reticulum)|GO:0005829(cytosol)|GO:0006585(dopamine biosynthetic process from tyrosine)|GO:0007507(heart develop…	CCAGGATGGTCCTGCATTCCTCCTGCCCTTCATGCTGTATTCTACCCTGATTATTATCTC	7054	TH	0
A_55_P2075499	3.00059	6.68973e-06	Ttll9	tubulin tyrosine ligase-like family, member 9	Mus musculus tubulin tyrosine ligase-like family, member 9 (Ttll9), transcript variant 2, mRNA [NM_029064]	NM_029064	NM_029064	74711	chr2	152828700	152828759	+	35537	84	104	A_55_P2075499	FALSE	Mm.44746	ENSMUST00000109801		ref|NM_029064|ens|ENSMUST00000109801|ens|ENSMUST00000152158|ens|ENSMUST00000146626	chr2:152828700-152828759	mm|2qH1	GO:0003674(molecular_function)|GO:0005575(cellular_component)|GO:0005737(cytoplasm)|GO:0005856(cytoskeleton)|GO:0005874(microtubule)|GO:0005929(cilium)|GO:0006464(cellular protein modification process)|GO:0008150(biological_process)|GO:0016874(ligase activity)|GO:0042995(cell projection)	AGAGGATGGGCCTTCTGACCTATCAGGGATGGGGAACTTTGTGACCAACACTCACCTAGG	164395	TTLL9	0
A_51_P118188	2.98721	2.02756e-05	Lmo3	LIM domain only 3	Mus musculus LIM domain only 3 (Lmo3), mRNA [NM_207222]	NM_207222	NM_207222	109593	chr6	138313526	138313467	-	44619	56	308	A_51_P118188	FALSE	Mm.490545	ENSMUST00000067437		ref|NM_207222|ens|ENSMUST00000067437|gb|AK034177|ens|ENSMUST00000163065	chr6:138313526-138313467	mm|6qG1	GO:0006351(transcription, DNA-dependent)|GO:0006355(regulation of transcription, DNA-dependent)|GO:0008270(zinc ion binding)|GO:0045600(positive regulation of fat cell differentiation)|GO:0046872(metal ion binding)	TTGTGTAAATGTTGTCCAGATTTCTCCCTAGGAGATGAGGGCTTTGTGTCCGTGGTTAAT	55885	LMO3	0
A_51_P513153	2.97516	0.00209161	Pnmt	phenylethanolamine-N-methyltransferase	Mus musculus phenylethanolamine-N-methyltransferase (Pnmt), mRNA [NM_008890]	NM_008890	NM_008890	18948	chr11	98248798	98248857	+	44038	58	158	A_51_P513153	FALSE	Mm.57030	ENSMUST00000041301		ref|NM_008890|ens|ENSMUST00000041301|gb|AK136691|gb|BC119079	chr11:098248798-098248857	mm|11qD	GO:0004603(phenylethanolamine N-methyltransferase activity)|GO:0005737(cytoplasm)|GO:0008168(methyltransferase activity)|GO:0016740(transferase activity)|GO:0030424(axon)|GO:0030425(dendrite)|GO:0032259(methylation)|GO:0042415(norepinephrine metabolic process)|GO:0042418(epinephrine biosynthetic process)|GO:0042423(catecholamine biosynthetic process)|GO:0043025(neuronal cell body)|GO:0043195(term…	AGCCAGGAGCCTTTGACTGGAGTGTGTATAGTCAGCATGCCTGCCTCATTGAGGACAAGG	5409	PNMT	0
A_55_P2152009	2.95573	0.000444904	Tesc	tescalcin	Mus musculus tescalcin (Tesc), mRNA [NM_021344]	NM_021344	NM_021344	57816	chr5	118511820	118511879	+	40597	69	151	A_55_P2152009	FALSE	Mm.273285	ENSMUST00000135540		ref|NM_021344|ens|ENSMUST00000135540|ens|ENSMUST00000031304|ref|XR_387574	chr5:118511820-118511879	mm|5qF	GO:0000287(magnesium ion binding)|GO:0001726(ruffle)|GO:0004860(protein kinase inhibitor activity)|GO:0005509(calcium ion binding)|GO:0005623(cell)|GO:0005634(nucleus)|GO:0005654(nucleoplasm)|GO:0005737(cytoplasm)|GO:0005886(plasma membrane)|GO:0006810(transport)|GO:0006883(cellular sodium ion homeostasis)|GO:0008285(negative regulation of cell proliferation)|GO:0010628(positive regulation of gen…	GTGGTGTGTGGGACTCCGATATTTTTATCTCTAATGGTGACAATAAAGGTTTCCTAATGA	54997	TESC	0
A_55_P2078463	2.95554	0.0184339	Nrl	neural retina leucine zipper gene	Mus musculus neural retina leucine zipper gene (Nrl), transcript variant 3, mRNA [NM_001271916]	NM_001271916	NM_001271916	18185	chr14	56138424	56138365	-	28107	107	203	A_55_P2078463	FALSE	Mm.20422			ref|NM_001271916|ref|NM_001136074|ref|NM_008736|ref|NM_001271917	chr14:056138424-056138365	mm|14qC3	GO:0000978(RNA polymerase II core promoter proximal region sequence-specific DNA binding)|GO:0001077(RNA polymerase II core promoter proximal region sequence-specific DNA binding transcription factor activity involved in positive regulation of transcription)|GO:0003677(DNA binding)|GO:0003700(sequence-specific DNA binding transcription factor activity)|GO:0005634(nucleus)|GO:0006351(transcription…	CCTCACAGGATAACAGGGAGCCGAGAGACTGTGACTTTTTGTGAATTAAACCTCAAGTTC	4901	NRL	0
A_55_P1961152	2.94355	0.000110281	Pou3f1	POU domain, class 3, transcription factor 1	Mus musculus POU domain, class 3, transcription factor 1 (Pou3f1), mRNA [NM_011141]	NM_011141	NM_011141	18991	chr4	124337692	124337751	+	36864	80	74	A_55_P1961152	FALSE	Mm.297371	ENSMUST00000053491		ref|NM_011141|ens|ENSMUST00000053491|gb|AK140274|gb|AK139418	chr4:124337692-124337751	mm|4qD2.2	GO:0001105(RNA polymerase II transcription coactivator activity)|GO:0003677(DNA binding)|GO:0003700(sequence-specific DNA binding transcription factor activity)|GO:0003705(RNA polymerase II distal enhancer sequence-specific DNA binding transcription factor activity)|GO:0005634(nucleus)|GO:0005667(transcription factor complex)|GO:0006351(transcription, DNA-dependent)|GO:0006355(regulation of trans…	GGAGCTTCCCCCTTCACCATTTCTTCATCTGTTTGTTAAGGTTTCAGCTTAAATTTTGTT	5453	POU3F1	0
A_55_P1990231	2.93468	0.000705246	Tbx22	T-box 22	Mus musculus T-box 22 (Tbx22), transcript variant 3, mRNA [NM_001290747]	NM_001290747	NM_001290747	245572	chrX	104884006	104884065	+	50735	38	211	A_55_P1990231	FALSE	Mm.137011	ENSMUST00000168174		ref|NM_001290747|ens|ENSMUST00000168174|ref|XM_011247593|ref|XM_006528035	chrX:104884006-104884065	mm|XqD	GO:0000122(negative regulation of transcription from RNA polymerase II promoter)|GO:0003677(DNA binding)|GO:0003700(sequence-specific DNA binding transcription factor activity)|GO:0005634(nucleus)|GO:0006351(transcription, DNA-dependent)|GO:0006355(regulation of transcription, DNA-dependent)|GO:0045892(negative regulation of transcription, DNA-dependent)	CGCATCTTTGTGTTTGGTTGAAATGCATATACAACTTTATTGGCTCACATTTAACTGCTT	50945	TBX22	0
A_52_P413646	2.9343	0.000169339	Bmp6	bone morphogenetic protein 6	Mus musculus bone morphogenetic protein 6 (Bmp6), mRNA [NM_007556]	NM_007556	NM_007556	12161	chr13	38591479	38591538	+	25094	116	325	A_52_P413646	FALSE	Mm.385759	ENSMUST00000171970		ref|NM_007556|ens|ENSMUST00000171970|gb|X80992|gb|J04566	chr13:038591479-038591538	mm|13qA3.3	GO:0001503(ossification)|GO:0001649(osteoblast differentiation)|GO:0001654(eye development)|GO:0001822(kidney development)|GO:0001938(positive regulation of endothelial cell proliferation)|GO:0001958(endochondral ossification)|GO:0003323(type B pancreatic cell development)|GO:0005125(cytokine activity)|GO:0005160(transforming growth factor beta receptor binding)|GO:0005515(protein binding)|GO:000…	TGTCTACTGTTGTAGTTACGTGTTTTGTGTTGACTCTCGGTGGTGTGAGAATGTACTAAT	654	BMP6	0
A_55_P2107155	2.89988	8.22553e-07	Rasd2	RASD family, member 2	Mus musculus RASD family, member 2 (Rasd2), mRNA [NM_029182]	NM_029182	NM_029182	75141	chr8	77747953	77748012	+	27455	109	195	A_55_P2107155	FALSE	Mm.179267	ENSMUST00000139848		ref|NM_029182|ens|ENSMUST00000139848|gb|BC026377|gb|BC036988	chr8:077747953-077748012	mm|8qC1	GO:0000166(nucleotide binding)|GO:0001963(synaptic transmission, dopaminergic)|GO:0005525(GTP binding)|GO:0005886(plasma membrane)|GO:0007165(signal transduction)|GO:0007264(small GTPase mediated signal transduction)|GO:0007610(behavior)|GO:0007626(locomotory behavior)|GO:0016020(membrane)|GO:0031397(negative regulation of protein ubiquitination)|GO:0031624(ubiquitin conjugating enzyme binding)|G…	AGCTCTACTGCCTGGACCTCTGTGTACACTATCAATTAAAGTTGGTTTGTTAGCTGTGCC	23551	RASD2	0
A_55_P1959081	2.8855	0.0767613	Cdkl5	cyclin-dependent kinase-like 5	Mus musculus cyclin-dependent kinase-like 5, mRNA (cDNA clone IMAGE:1511699), with apparent retained intron. [BC038161]		BC038161	382253	chrX	157237163	157237104	-	2347	185	228	A_55_P1959081	FALSE	Mm.443717			gb|BC038161|tc|TC1639357|nap|NAP018605-001	chrX:157237163-157237104	mm|XqF4	GO:0000166(nucleotide binding)|GO:0001764(neuron migration)|GO:0004672(protein kinase activity)|GO:0004674(protein serine/threonine kinase activity)|GO:0004693(cyclin-dependent protein kinase activity)|GO:0005524(ATP binding)|GO:0005634(nucleus)|GO:0005654(nucleoplasm)|GO:0005737(cytoplasm)|GO:0006468(protein phosphorylation)|GO:0016301(kinase activity)|GO:0016310(phosphorylation)|GO:0016740(tran…	GAAGAGTATTTGCCTACCATGTATGAAAAACCTGGGTTATGTCCTCAAAACCATAAAAAA	6792	CDKL5	0
A_55_P2160218	2.85554	0.0192743	Nrl	neural retina leucine zipper gene	Mus musculus neural retina leucine zipper gene (Nrl), transcript variant 3, mRNA [NM_001271916]	NM_001271916	NM_001271916	18185	chr14	56138416	56138357	-	31611	96	84	A_55_P2160218	FALSE	Mm.20422			ref|NM_001271916|ref|NM_001136074|ref|NM_008736|ref|NM_001271917	chr14:056138416-056138357	mm|14qC3	GO:0000978(RNA polymerase II core promoter proximal region sequence-specific DNA binding)|GO:0001077(RNA polymerase II core promoter proximal region sequence-specific DNA binding transcription factor activity involved in positive regulation of transcription)|GO:0003677(DNA binding)|GO:0003700(sequence-specific DNA binding transcription factor activity)|GO:0005634(nucleus)|GO:0006351(transcription…	GATAACAGGGAGCCGAGAGACTGTGACTTTTTGTGAATTAAACCTCAAGTTCAAGAAAAA	4901	NRL	0
A_65_P12251	2.84511	1.03061e-05	Fut9	fucosyltransferase 9	Mus musculus fucosyltransferase 9 (Fut9), mRNA [NM_010243]	NM_010243	NM_010243	14348	chr4	25536705	25536646	-	4640	178	234	A_65_P12251	FALSE	Mm.39101	ENSMUST00000084770		ref|NM_010243|ens|ENSMUST00000084770|gb|AK162330|gb|CJ258716	chr4:025536705-025536646	mm|4qA3	GO:0000009(alpha-1,6-mannosyltransferase activity)|GO:0000026(alpha-1,2-mannosyltransferase activity)|GO:0000030(mannosyltransferase activity)|GO:0000033(alpha-1,3-mannosyltransferase activity)|GO:0001962(alpha-1,3-galactosyltransferase activity)|GO:0003980(UDP-glucose:glycoprotein glucosyltransferase activity)|GO:0004376(glycolipid mannosyltransferase activity)|GO:0004576(oligosaccharyl transfer…	TGGTTTTAACAATCTGAACAACAATTCAAGGCAGAAGTAAATGCATAAGGAATTTGAGCC	10690	FUT9	0
A_55_P2077153	2.83762	5.77201e-06	Slc27a2	solute carrier family 27 (fatty acid transporter), member 2	Mus musculus solute carrier family 27 (fatty acid transporter), member 2 (Slc27a2), mRNA [NM_011978]	NM_011978	NM_011978	26458	chr2	126413890	126413949	+	17140	140	162	A_55_P2077153	FALSE	Mm.290044	ENSMUST00000061491		ref|NM_011978|ens|ENSMUST00000061491|gb|BC013442|gb|BC022170	chr2:126413890-126413949	mm|2qF1	GO:0000038(very long-chain fatty acid metabolic process)|GO:0000166(nucleotide binding)|GO:0001561(fatty acid alpha-oxidation)|GO:0001676(long-chain fatty acid metabolic process)|GO:0003824(catalytic activity)|GO:0003996(acyl-CoA ligase activity)|GO:0004467(long-chain fatty acid-CoA ligase activity)|GO:0004774(succinate-CoA ligase activity)|GO:0005102(receptor binding)|GO:0005524(ATP binding)|GO:…	ATGTGCACCTGCCATTTGTCCTTGCAAACTAAGCTTCTTGGAGAGAGGGCCTTATTTTTT	11001	SLC27A2	0
A_51_P175424	2.81159	5.3382e-05	Car14	carbonic anhydrase 14	Mus musculus carbonic anhydrase 14 (Car14), mRNA [NM_011797]	NM_011797	NM_011797	23831	chr3	95701918	95701859	-	48547	44	324	A_51_P175424	FALSE	Mm.489647	ENSMUST00000036181		ref|NM_011797|ens|ENSMUST00000036181|ref|XM_006501443|ref|XM_006501442	chr3:095701918-095701859	mm|3qF2.1	GO:0004089(carbonate dehydratase activity)|GO:0006885(regulation of pH)|GO:0015670(carbon dioxide transport)|GO:0016020(membrane)|GO:0016021(integral to membrane)|GO:0016829(lyase activity)|GO:0046872(metal ion binding)	GGCTGAGCCTTTGGCCTTCAAAGCTGTGGATGAGGAGATTCCCTGTCCTCATGCTTGGTT	23632	CA14	0
A_51_P350666	2.80282	0.000610591	Peli2	pellino 2	Mus musculus pellino 2 (Peli2), mRNA [NM_033602]	NM_033602	NM_033602	93834	chr14	48879934	48879993	+	50880	37	250	A_51_P350666	FALSE	Mm.296457	ENSMUST00000073150		ref|NM_033602|ens|ENSMUST00000073150|ref|XM_006519741|ref|XM_006519740	chr14:048879934-048879993	mm|14qC1	GO:0001934(positive regulation of protein phosphorylation)|GO:0005515(protein binding)|GO:0005829(cytosol)|GO:0008063(Toll signaling pathway)|GO:0008766(UDP-N-acetylmuramoylalanyl-D-glutamyl-2,6-diaminopimelate-D-alanyl-D-alanine ligase activity)|GO:0016020(membrane)|GO:0016874(ligase activity)|GO:0018169(ribosomal S6-glutamic acid ligase activity)|GO:0043234(protein complex)|GO:0043410(positive …	AGGAGTAAAAACGGAAGAGTTCTGTCATTACTTTTCAGTAACAGGTCCTCAAAAATACCT	57161	PELI2	0
A_51_P372743	2.79817	0.00775604	Frmpd3	FERM and PDZ domain containing 3	Mus musculus FERM and PDZ domain containing 3 (Frmpd3), mRNA [NM_177750]	NM_177750	NM_177750	245643	chrX	136928971	136929030	+	39810	71	86	A_51_P372743	FALSE	Mm.208683	ENSMUST00000044702		ref|NM_177750|ens|ENSMUST00000044702|ref|XM_011247742|gb|BC129957	chrX:136928971-136929030	mm|XqF1	GO:0003674(molecular_function)|GO:0005575(cellular_component)|GO:0008150(biological_process)	TATATGTATACCCTTAGCTGTGAAGTAAATGTTTGCTATGTAGTAAGATGGAAAAGAGGG	84443	FRMPD3	0
A_55_P1958275	2.79375	5.53556e-07	Bcl11a	B cell CLL/lymphoma 11A (zinc finger protein)	Mus musculus B cell CLL/lymphoma 11A (zinc finger protein) (Bcl11a), transcript variant 1, mRNA [NM_016707]	NM_016707	NM_016707	14025	chr11	24073114	24073173	+	28717	105	295	A_55_P1958275	FALSE	Mm.53687	ENSMUST00000000881		ref|NM_016707|ref|NM_001159289|ref|NM_001159290|ens|ENSMUST00000000881	chr11:024073114-024073173	mm|11qA3.2	GO:0000122(negative regulation of transcription from RNA polymerase II promoter)|GO:0000978(RNA polymerase II core promoter proximal region sequence-specific DNA binding)|GO:0001078(RNA polymerase II core promoter proximal region sequence-specific DNA binding transcription factor activity involved in negative regulation of transcription)|GO:0003676(nucleic acid binding)|GO:0003714(transcription c…	CCTGACCCCTTGTTTCTATACATTCTATGTTGTCTTTTAAAAAGTGTGCTTAACATTGAC	53335	BCL11A	0
A_52_P331727	2.7866	9.75337e-05	Thsd7b	thrombospondin, type I, domain containing 7B	Mus musculus thrombospondin, type I, domain containing 7B (Thsd7b), mRNA [NM_172485]	NM_172485	NM_172485	210417	chr1	132115519	132115578	+	61095	6	156	A_52_P331727	FALSE	Mm.380518	ENSMUST00000140834		ref|NM_172485|ens|ENSMUST00000140834|ens|ENSMUST00000073527|ref|XM_011247965	chr1:132115519-132115578	mm|1qE4	GO:0003674(molecular_function)|GO:0005575(cellular_component)|GO:0008150(biological_process)|GO:0016020(membrane)|GO:0016021(integral to membrane)	AACCTAGCTGTGTAGATATAGCATTGATCACACACAGTTGTAATTCAGTTTAATGTTGAC	80731	THSD7B	0
A_51_P391955	2.77756	0.000637547	Dapl1	death associated protein-like 1	Mus musculus death associated protein-like 1 (Dapl1), mRNA [NM_029723]	NM_029723	NM_029723	76747	chr2	59342824	59342883	+	35697	84	111	A_51_P391955	FALSE	Mm.275769	ENSMUST00000144415		ref|NM_029723|ens|ENSMUST00000144415|ens|ENSMUST00000028369|gb|BC116916	chr2:059342824-059342883	mm|2qC1.1	GO:0003674(molecular_function)|GO:0005575(cellular_component)|GO:0006915(apoptotic process)|GO:0008150(biological_process)|GO:0030154(cell differentiation)	TCTGGAGAAGGCTGCTCCAATGAAGAGGGCCTACATTATTCAGCAACCTCGAAAATGTTA	92196	DAPL1	0
A_52_P381553	2.77539	0.00185796	Btbd17	BTB (POZ) domain containing 17	Mus musculus BTB (POZ) domain containing 17 (Btbd17), mRNA [NM_028055]	NM_028055	NM_028055	72014	chr11	114652781	114652723	-	21532	127	233	A_52_P381553	FALSE	Mm.38347	ENSMUST00000156053		ref|NM_028055|ens|ENSMUST00000156053|ens|ENSMUST00000156192|ens|ENSMUST00000000206	chr11:114652781-114652723	mm|11qE2	GO:0003674(molecular_function)|GO:0005575(cellular_component)|GO:0005576(extracellular region)|GO:0008150(biological_process)	TCATCCGGACTCCCAGTTAACCTCTGGATTGAGAAATAAGGCTAGGCCTGGATGGCGCAG	388419	BTBD17	0
A_51_P221510	2.76609	7.07828e-05	Fam81a	family with sequence similarity 81, member A	Mus musculus family with sequence similarity 81, member A (Fam81a), mRNA [NM_029784]	NM_029784	NM_029784	76886	chr9	69937901	69937842	-	40167	70	28	A_51_P221510	FALSE	Mm.44355	ENSMUST00000034749		ref|NM_029784|ens|ENSMUST00000034749|ref|XM_006511551|ref|XM_006511550	chr9:069937901-069937842	mm|9qD	GO:0003674(molecular_function)|GO:0005575(cellular_component)|GO:0008150(biological_process)	GATATTTATATCCACCTAGGGGTACCGGCTTTTACTATTTAAAGCTATTTTTGAAACCAC	145773	FAM81A	0
A_51_P260850	2.73668	0.00284225	Cntnap2	contactin associated protein-like 2	Mus musculus contactin associated protein-like 2 (Cntnap2), transcript variant 2, mRNA [NM_025771]	NM_025771	NM_025771	66797	chr6	47249076	47249135	+	55069	25	71	A_51_P260850	FALSE	Mm.440084	ENSMUST00000114641		ref|NM_025771|ref|NM_001004357|ens|ENSMUST00000114641|ref|XM_006506483	chr6:047249076-047249135	mm|6qB2.3	GO:0002020(protease binding)|GO:0005515(protein binding)|GO:0005769(early endosome)|GO:0005794(Golgi apparatus)|GO:0007155(cell adhesion)|GO:0007612(learning)|GO:0008038(neuron recognition)|GO:0008076(voltage-gated potassium channel complex)|GO:0009986(cell surface)|GO:0016020(membrane)|GO:0016021(integral to membrane)|GO:0019899(enzyme binding)|GO:0030534(adult behavior)|GO:0030673(axolemma)|GO:…	AGTTTGTGTCCAAATAATATTTCTTTTGGTGTCCCATAAAATGGAAATGAGAAAAGGGGC	26047	CNTNAP2	0
A_55_P2128283	2.71095	0.00156375	Nr2f2	nuclear receptor subfamily 2, group F, member 2	Mus musculus nuclear receptor subfamily 2, group F, member 2 (Nr2f2), transcript variant 1, mRNA [NM_009697]	NM_009697	NM_009697	11819	chr7	77496932	77496873	-	42289	64	47	A_55_P2128283	FALSE	Mm.158143	ENSMUST00000032768		ref|NM_009697|ref|NM_183261|ens|ENSMUST00000032768|ref|XM_006540577	chr7:077496932-077496873	mm|7qD1	GO:0000122(negative regulation of transcription from RNA polymerase II promoter)|GO:0001701(in utero embryonic development)|GO:0001764(neuron migration)|GO:0001893(maternal placenta development)|GO:0001937(negative regulation of endothelial cell proliferation)|GO:0001972(retinoic acid binding)|GO:0003677(DNA binding)|GO:0003700(sequence-specific DNA binding transcription factor activity)|GO:00037…	GGCCCTTTTCCTTGTTTGCTTTGTGTTAGCTTATTGTAAACAGCCATTTGTTGTAAATTA	7026	NR2F2	0
A_55_P2041653	2.69856	4.80265e-05	1500009C09Rik	RIKEN cDNA 1500009C09 gene	Mus musculus RIKEN cDNA 1500009C09 gene (1500009C09Rik), transcript variant 2, long non-coding RNA [NR_037697]	NR_037697	NR_037697	76505	chr15	82091116	82091175	+	20077	131	192	A_55_P2041653	FALSE	Mm.23023			ref|NR_037697|ref|NR_037698|gb|AK005178|gb|BC094356	chr15:82091116-82091175	mm|15qE1	GO:0003674(molecular_function)|GO:0005575(cellular_component)|GO:0008150(biological_process)	GTCTGTCCTGCTGCGGCTTCACTTGTGCAACGCTAATAAAGGTTCTATGGCCACCTTTGC			0
A_51_P383399	2.69838	0.00180094	Aldh1a7	aldehyde dehydrogenase family 1, subfamily A7	Mus musculus aldehyde dehydrogenase family 1, subfamily A7 (Aldh1a7), mRNA [NM_011921]	NM_011921	NM_011921	26358	chr19	20767612	20767553	-	22542	124	181	A_51_P383399	FALSE	Mm.14609	ENSMUST00000025656		ref|NM_011921|ens|ENSMUST00000025656|gb|U96401|gb|BC032880	chr19:020767612-020767553	mm|19qB	GO:0001758(retinal dehydrogenase activity)|GO:0004028(3-chloroallyl aldehyde dehydrogenase activity)|GO:0004029(aldehyde dehydrogenase (NAD) activity)|GO:0005737(cytoplasm)|GO:0008152(metabolic process)|GO:0016491(oxidoreductase activity)|GO:0016620(oxidoreductase activity, acting on the aldehyde or oxo group of donors, NAD or NADP as acceptor)|GO:0018479(benzaldehyde dehydrogenase (NAD+) activit…	TTCCTTGAACTATGTACCATGCATGATAACTGAAAAGTTAGCTGCTCTATTCCTCGGGGT	216	ALDH1A1	0
A_55_P1987186	2.68334	0.00014636	Ttll9	tubulin tyrosine ligase-like family, member 9	Mus musculus tubulin tyrosine ligase-like family, member 9 (Ttll9), transcript variant 1, mRNA [NM_001083618]	NM_001083618	NM_001083618	74711	chr2	152832988	152833047	+	18812	135	98	A_55_P1987186	FALSE	Mm.44746	ENSMUST00000099197		ref|NM_001083618|ens|ENSMUST00000099197|ens|ENSMUST00000165343|ens|ENSMUST00000150218	chr2:152832988-152833047	mm|2qH1	GO:0003674(molecular_function)|GO:0005575(cellular_component)|GO:0005737(cytoplasm)|GO:0005856(cytoskeleton)|GO:0005874(microtubule)|GO:0005929(cilium)|GO:0006464(cellular protein modification process)|GO:0008150(biological_process)|GO:0016874(ligase activity)|GO:0042995(cell projection)	AGTTCCACTGCTCAGAGAGCACGTCTAATACCACATCTAATAAAGCACAGGCTTAGAGCT	164395	TTLL9	0
A_55_P1961395	2.68242	0.039402	Pdpn	podoplanin	Mus musculus podoplanin (Pdpn), transcript variant 1, mRNA [NM_010329]	NM_010329	NM_010329	14726	chr4	142857398	142857339	-	46339	51	148	A_55_P1961395	FALSE	Mm.2976	ENSMUST00000030317		ref|NM_010329|ref|NM_001290822|ens|ENSMUST00000030317|ens|ENSMUST00000181754	chr4:142857398-142857339	mm|4qE1	GO:0000902(cell morphogenesis)|GO:0001726(ruffle)|GO:0001946(lymphangiogenesis)|GO:0005372(water transmembrane transporter activity)|GO:0005886(plasma membrane)|GO:0006693(prostaglandin metabolic process)|GO:0006833(water transport)|GO:0006865(amino acid transport)|GO:0006928(cellular component movement)|GO:0007155(cell adhesion)|GO:0007165(signal transduction)|GO:0007275(multicellular organismal…	CGTCTGTGTTGGTACCCAATACAGTGTAGACATCTTTTCAAATAAAACCTGATTGTGTCC	10630	PDPN	0
A_51_P499698	2.67803	4.42995e-05	Asprv1	aspartic peptidase, retroviral-like 1	Mus musculus aspartic peptidase, retroviral-like 1 (Asprv1), mRNA [NM_026414]	NM_026414	NM_026414	67855	chr6	86579351	86579410	+	31757	96	119	A_51_P499698	FALSE	Mm.183043	ENSMUST00000043400		ref|NM_026414|ens|ENSMUST00000043400|gb|BC057938|gb|BC119099	chr6:086579351-086579410	mm|6qD1	GO:0004190(aspartic-type endopeptidase activity)|GO:0006508(proteolysis)|GO:0008233(peptidase activity)|GO:0016020(membrane)|GO:0016021(integral to membrane)|GO:0016485(protein processing)|GO:0016787(hydrolase activity)|GO:0042500(aspartic endopeptidase activity, intramembrane cleaving)|GO:0043588(skin development)	TTGGTGGCCTAAAGCAGTGTCCCCAAGGTCTGCAAAGACTTCCAAGGCTGGCAGGAGCTT	151516	ASPRV1	0
A_55_P1962821	2.6242	0.00549003	Gpr119	G-protein coupled receptor 119	Mus musculus G-protein coupled receptor 119 (Gpr119), mRNA [NM_181751]	NM_181751	NM_181751	236781	chrX	46021255	46021196	-	8923	165	196	A_55_P1962821	FALSE	Mm.269129	ENSMUST00000053970		ref|NM_181751|ens|ENSMUST00000053970|gb|AB233291|tc|TC1596741	chrX:046021255-046021196	mm|XqA4	GO:0004871(signal transducer activity)|GO:0004930(G-protein coupled receptor activity)|GO:0005623(cell)|GO:0005886(plasma membrane)|GO:0007165(signal transduction)|GO:0007186(G-protein coupled receptor signaling pathway)|GO:0008289(lipid binding)|GO:0016020(membrane)|GO:0016021(integral to membrane)|GO:0030073(insulin secretion)|GO:0031210(phosphatidylcholine binding)|GO:0043235(receptor complex)	GCATAAATCTCTAATGTGCCTCTGTTCAATTACTGAATTTTATACAGTCTTCAAAGCAGC	139760	GPR119	0
A_52_P599317	2.56843	0.000230095	Hs6st2	heparan sulfate 6-O-sulfotransferase 2	Mus musculus heparan sulfate 6-O-sulfotransferase 2 (Hs6st2), transcript variant 1, mRNA [NM_001077202]	NM_001077202	NM_001077202	50786	chrX	48741078	48741019	-	59978	10	93	A_52_P599317	FALSE	Mm.252561			ref|NM_001077202|ref|NM_001290467|ref|NM_001290468|ref|NM_015819	chrX:048741078-048741019	mm|XqA5	GO:0001517(N-acetylglucosamine 6-O-sulfotransferase activity)|GO:0001537(N-acetylgalactosamine 4-O-sulfotransferase activity)|GO:0004394(heparan sulfate 2-O-sulfotransferase activity)|GO:0005654(nucleoplasm)|GO:0008146(sulfotransferase activity)|GO:0015015(heparan sulfate proteoglycan biosynthetic process, enzymatic modification)|GO:0016020(membrane)|GO:0016021(integral to membrane)|GO:0016232(HN…	CAAGAGGGACATGCTTAGAAATATGATCATAAAGTCACATCTGTCATAGTCTGCCCAAGT	90161	HS6ST2	0
A_55_P2066799	2.56026	0.145256	Sctr	secretin receptor	Mus musculus secretin receptor (Sctr), mRNA [NM_001012322]	NM_001012322	NM_001012322	319229	chr1	121953023	121953082	+	22789	123	16	A_55_P2066799	FALSE	Mm.189223	ENSMUST00000189037		ref|NM_001012322|ens|ENSMUST00000189037|ens|ENSMUST00000072886|ref|XM_006529685	chr1:121953023-121953082	mm|1qE2.3	GO:0004871(signal transducer activity)|GO:0004888(transmembrane signaling receptor activity)|GO:0004930(G-protein coupled receptor activity)|GO:0005881(cytoplasmic microtubule)|GO:0005886(plasma membrane)|GO:0007165(signal transduction)|GO:0007166(cell surface receptor signaling pathway)|GO:0007186(G-protein coupled receptor signaling pathway)|GO:0015055(secretin receptor activity)|GO:0016020(mem…	ATTGTCTTCGCCTTCTCCCCAGAGGGTGCCATGGAGGTCCAGCTGTTCTTTGAATTGGCC	6344	SCTR	0
A_52_P114962	2.54894	0.0137457	Tcerg1l	transcription elongation regulator 1-like	Mus musculus transcription elongation regulator 1-like (Tcerg1l), mRNA [NM_183289]	NM_183289	NM_183289	70571	chr7	145451610	145451551	-	51217	36	232	A_52_P114962	FALSE	Mm.334297	ENSMUST00000161213		ref|NM_183289|ens|ENSMUST00000161213|ens|ENSMUST00000162222|ens|ENSMUST00000160436	chr7:145451610-145451551	mm|7qF4	GO:0003674(molecular_function)|GO:0005575(cellular_component)|GO:0008150(biological_process)	CGGGTTTTCTTCTTCAACCCGACCATGCAGCTGTCAGTCTGGGAGAAGCCAGTGGACCTA	256536	TCERG1L	0
A_52_P110741	2.54316	0.0147638	Pcdhb5	protocadherin beta 5	Mus musculus protocadherin beta 5 (Pcdhb5), mRNA [NM_053130]	NM_053130	NM_053130	93876	chr18	37482661	37482720	+	48334	45	94	A_52_P110741	FALSE	Mm.196698	ENSMUST00000078271		ref|NM_053130|ens|ENSMUST00000078271|gb|BC141147|gb|AK028661	chr18:037482661-037482720	mm|18qB3	GO:0005737(cytoplasm)|GO:0005886(plasma membrane)|GO:0045111(intermediate filament cytoskeleton)	TGAAGTTTTCCACTAGTTTAACCTACTTATATCTCTTACAGTGCTGATAGTTTCTTTCTT	56131	PCDHB4	0
A_51_P485756	2.52781	0.0585531	Nts	neurotensin	Mus musculus neurotensin (Nts), mRNA [NM_024435]	NM_024435	NM_024435	67405	chr10	101945026	101944967	-	30631	99	76	A_51_P485756	FALSE	Mm.64201	ENSMUST00000020040		ref|NM_024435|ens|ENSMUST00000020040|ref|XM_006513992|gb|AF304160	chr10:101945026-101944967	mm|10qD1	GO:0005184(neuropeptide hormone activity)|GO:0005576(extracellular region)|GO:0008542(visual learning)|GO:0031410(cytoplasmic vesicle)|GO:0043025(neuronal cell body)|GO:0043679(axon terminus)|GO:0050880(regulation of blood vessel size)	AGCTGTATGAGAATAAACCCAGAAGGCCCTACATTCTCAAGAGGGGTTCCTACTACTACT	4922	NTS	0
A_51_P283300	2.52561	0.00043508	Cacnb2	calcium channel, voltage-dependent, beta 2 subunit	Mus musculus calcium channel, voltage-dependent, beta 2 subunit (Cacnb2), transcript variant 1, mRNA [NM_023116]	NM_023116	NM_023116	12296	chr2	14907912	14907971	+	40720	68	234	A_51_P283300	FALSE	Mm.313930	ENSMUST00000193452		ref|NM_023116|ref|NM_001252533|ref|NR_045533|ens|ENSMUST00000193452	chr2:014907912-014907971	mm|2qA2	GO:0005244(voltage-gated ion channel activity)|GO:0005245(voltage-gated calcium channel activity)|GO:0005246(calcium channel regulator activity)|GO:0005262(calcium channel activity)|GO:0005515(protein binding)|GO:0005886(plasma membrane)|GO:0005891(voltage-gated calcium channel complex)|GO:0006810(transport)|GO:0006811(ion transport)|GO:0006816(calcium ion transport)|GO:0007268(synaptic transmiss…	TCAAAAGCTGTTTGGGTAGCTGCCATCTCAACAGAGTGGCTCCAGAAACGTAGTTACTAT	783	CACNB2	0
A_55_P2048751	2.52461	0.00292793	Prox1	prospero homeobox 1	Mus musculus prospero homeobox 1 (Prox1), mRNA [NM_008937]	NM_008937	NM_008937	19130	chr1	191945844	191945785	-	25145	116	223	A_55_P2048751	FALSE	Mm.132579			ref|NM_008937|gb|BC051411|tc|TC1584495	chr1:191945844-191945785	mm|1qH6	GO:0000122(negative regulation of transcription from RNA polymerase II promoter)|GO:0000981(sequence-specific DNA binding RNA polymerase II transcription factor activity)|GO:0001046(core promoter sequence-specific DNA binding)|GO:0001709(cell fate determination)|GO:0001938(positive regulation of endothelial cell proliferation)|GO:0001945(lymph vessel development)|GO:0001946(lymphangiogenesis)|GO:…	ACGTTTGTTTTCTTAGCTGGATTTTTGTGTACGGGTGCAGTAAACAGCACTGTTCACTCT	5629	PROX1	0
A_55_P1974527	2.5123	0.0421665	Ntsr2	neurotensin receptor 2	Mus musculus neurotensin receptor 2 (Ntsr2), mRNA [NM_008747]	NM_008747	NM_008747	18217	chr12	16666717	16666776	+	2200	186	193	A_55_P1974527	FALSE	Mm.281715	ENSMUST00000111064		ref|NM_008747|ens|ENSMUST00000111064|ref|XM_006515011|ref|XM_006515012	chr12:016666717-016666776	mm|12qA1.1	GO:0004871(signal transducer activity)|GO:0004930(G-protein coupled receptor activity)|GO:0005802(trans-Golgi network)|GO:0005886(plasma membrane)|GO:0007165(signal transduction)|GO:0007186(G-protein coupled receptor signaling pathway)|GO:0007200(phospholipase C-activating G-protein coupled receptor signaling pathway)|GO:0007218(neuropeptide signaling pathway)|GO:0007268(synaptic transmission)|GO…	TACAGTTTCCGGCTTTGGGGATCCCCAAGAAACCCCAGCCTGGGTGAAATACAAGTGTGA	23620	NTSR2	0
A_55_P2064962	2.50525	0.124138	Pdpn	podoplanin	Mus musculus podoplanin (Pdpn), transcript variant 1, mRNA [NM_010329]	NM_010329	NM_010329	14726	chr4	142859146	142858329	-	36211	82	68	A_55_P2064962	FALSE	Mm.2976	ENSMUST00000030317		ref|NM_010329|ref|NM_001290822|ens|ENSMUST00000030317|ens|ENSMUST00000181754	chr4:142859146-142859087	mm|4qE1	GO:0000902(cell morphogenesis)|GO:0001726(ruffle)|GO:0001946(lymphangiogenesis)|GO:0005372(water transmembrane transporter activity)|GO:0005886(plasma membrane)|GO:0006693(prostaglandin metabolic process)|GO:0006833(water transport)|GO:0006865(amino acid transport)|GO:0006928(cellular component movement)|GO:0007155(cell adhesion)|GO:0007165(signal transduction)|GO:0007275(multicellular organismal…	GGCTTCGTCGGAGGGATCTTCATTGTTGTTATGAAGAAGATTTCTGGAAGGTTCTCGTAA	10630	PDPN	0
A_52_P423222	2.50246	7.80307e-05	Nfe2l3	nuclear factor, erythroid derived 2, like 3	Mus musculus nuclear factor, erythroid derived 2, like 3 (Nfe2l3), mRNA [NM_010903]	NM_010903	NM_010903	18025	chr6	51408131	51408190	+	34337	88	207	A_52_P423222	FALSE	Mm.42138	ENSMUST00000005103		ref|NM_010903|ens|ENSMUST00000005103|gb|AK153612|gb|AK136980	chr6:051408131-051408190	mm|6qB3	GO:0000122(negative regulation of transcription from RNA polymerase II promoter)|GO:0000978(RNA polymerase II core promoter proximal region sequence-specific DNA binding)|GO:0001078(RNA polymerase II core promoter proximal region sequence-specific DNA binding transcription factor activity involved in negative regulation of transcription)|GO:0003677(DNA binding)|GO:0003700(sequence-specific DNA bi…	CTGCCGTAAACGTAAACTAGACATCATTTTGAATCTAGAGGATGATATATGTAACTTGCA	9603	NFE2L3	0
A_52_P388359	2.49571	0.0186417	Prdx6	peroxiredoxin 6	Mus musculus peroxiredoxin 6 (Prdx6), transcript variant 1, mRNA [NM_007453]	NM_007453	NM_007453	11758	chr1	163170772	163170713	-	2916	184	73	A_52_P388359	FALSE	Mm.186185	ENSMUST00000071718		ref|NM_007453|ref|NM_001303408|ref|NR_130150|ens|ENSMUST00000071718	chr1:163170772-163170713	mm|1qH2.1	GO:0000302(response to reactive oxygen species)|GO:0003824(catalytic activity)|GO:0004601(peroxidase activity)|GO:0004602(glutathione peroxidase activity)|GO:0004620(phospholipase activity)|GO:0004623(phospholipase A2 activity)|GO:0005515(protein binding)|GO:0005615(extracellular space)|GO:0005737(cytoplasm)|GO:0005739(mitochondrion)|GO:0005764(lysosome)|GO:0005829(cytosol)|GO:0006629(lipid metab…	GGTTGAGAACCACTAATGGTTAGGTAGTCTGGCCTCATTAGTGTAAGCTCTGAGATAGTG	9588	PRDX6	0
A_55_P2130032	2.48524	1.71452e-05	Zfp599	zinc finger protein 599	Mus musculus zinc finger protein 599 (Zfp599), mRNA [NM_181419]	NM_181419	NM_181419	235048	chr9	22054125	22054066	-	8732	166	249	A_55_P2130032	FALSE	Mm.292381	ENSMUST00000086281		ref|NM_181419|ens|ENSMUST00000086281|ref|XM_011242471|gb|AK032725	chr9:022054125-022054066	mm|9qA3	GO:0003674(molecular_function)|GO:0005575(cellular_component)|GO:0008150(biological_process)	ATGAATGTAAGGAGTGTGGGAAATCATTCTACCAGAAATCAAAACTCACTCTACATCAAA			0
A_55_P1972172	2.48276	1.41725e-06	Cacng2	calcium channel, voltage-dependent, gamma subunit 2	Mus musculus calcium channel, voltage-dependent, gamma subunit 2 (Cacng2), mRNA [NM_007583]	NM_007583	NM_007583	12300	chr15	77825349	77825290	-	51775	35	99	A_55_P1972172	FALSE	Mm.400802			ref|NM_007583|gb|AK045362|tc|TC1632873|riken|B230106G23	chr15:077825349-077825290	mm|15qE1	GO:0005244(voltage-gated ion channel activity)|GO:0005245(voltage-gated calcium channel activity)|GO:0005262(calcium channel activity)|GO:0005891(voltage-gated calcium channel complex)|GO:0006810(transport)|GO:0006811(ion transport)|GO:0006816(calcium ion transport)|GO:0007528(neuromuscular junction development)|GO:0016020(membrane)|GO:0016021(integral to membrane)|GO:0019226(transmission of nerv…	CCACAGGCTATGCGGGGGGAAAATATAACCGAGGGAAGACAAACTTTAAACAAAGCAAGA	10369	CACNG2	0
A_52_P306357	2.48173	0.0250013	Prok1	prokineticin 1	Mus musculus prokineticin 1, mRNA (cDNA clone MGC:51604 IMAGE:4975079), complete cds. [BC042707]		BC042707	246691	chr3	107036012	107035953	-	61729	4	200	A_52_P306357	FALSE	Mm.490697			gb|BC042707|gb|AK044344|tc|TC1605109|tc|TC1609905	chr3:107036012-107035953	mm|3qF2.3	GO:0000187(activation of MAPK activity)|GO:0001525(angiogenesis)|GO:0001664(G-protein coupled receptor binding)|GO:0005576(extracellular region)|GO:0007623(circadian rhythm)|GO:0008083(growth factor activity)|GO:0008284(positive regulation of cell proliferation)|GO:0045765(regulation of angiogenesis)|GO:0051781(positive regulation of cell division)	CTGAGTAAGGTCCAGGGAAACTCGAGTTAGCTACTATCTATCCAGTTGTTACCTGGTGAT	84432	PROK1	0
A_55_P2040026	2.47303	0.00453582	Itga4	integrin alpha 4	Mus musculus integrin alpha 4 (Itga4), mRNA [NM_010576]	NM_010576	NM_010576	16401	chr2	79173193	79173252	+	15146	146	214	A_55_P2040026	FALSE	Mm.31903	ENSMUST00000099972		ref|NM_010576|ens|ENSMUST00000099972|gb|AK040125|gb|AK171822	chr2:079173193-079173252	mm|2qC3	GO:0001968(fibronectin binding)|GO:0001974(blood vessel remodeling)|GO:0002687(positive regulation of leukocyte migration)|GO:0003366(cell-matrix adhesion involved in ameboidal cell migration)|GO:0005886(plasma membrane)|GO:0005911(cell-cell junction)|GO:0005925(focal adhesion)|GO:0007155(cell adhesion)|GO:0007157(heterophilic cell-cell adhesion)|GO:0007159(leukocyte cell-cell adhesion)|GO:000716…	GTGTGTGGAATGCATTATAAAGATCTAACAGTCAACTCCATTACTTTGTGTGCTGAATTA	3676	ITGA4	0
A_66_P124669	2.47112	0.000327916	A730020E08Rik	RIKEN cDNA A730020E08 gene	Mus musculus 7 days neonate cerebellum cDNA, RIKEN full-length enriched library, clone:A730020E08 product:unclassifiable, full insert sequence. [AK042736]		AK042736	100504262	chr6	61124095	61124036	-	39649	72	79	A_66_P124669	FALSE				gb|AK042736|riken|A730020E08|nap|NAP023464-001	chr6:61124095-61124036	mm|6qB3	GO:0003674(molecular_function)|GO:0005575(cellular_component)|GO:0008150(biological_process)	AGCGCTGTATTCAGGACAAGGAGTGATTTTATCACGTAAATTCAGTCTTTTATTCACAAT			0
A_52_P301085	2.46121	0.000104144	Dctd	dCMP deaminase	Mus musculus dCMP deaminase (Dctd), transcript variant 1, mRNA [NM_178788]	NM_178788	NM_178788	320685	chr8	49226475	49226534	+	6754	172	269	A_52_P301085	FALSE	Mm.121549			ref|NM_178788|ref|NM_001161515|ref|NM_001161516|ref|NR_027759	chr8:049226475-049226534	mm|8qB1.2	GO:0003824(catalytic activity)|GO:0004132(dCMP deaminase activity)|GO:0006220(pyrimidine nucleotide metabolic process)|GO:0008150(biological_process)|GO:0008152(metabolic process)|GO:0008270(zinc ion binding)|GO:0009165(nucleotide biosynthetic process)|GO:0016787(hydrolase activity)|GO:0046872(metal ion binding)|GO:0070062(extracellular vesicular exosome)	GCACTGTTAAATTTATCCGAGGCATAAGTAGTTCCTAGAGGAGACAGTCTATCACTCCCC	1635	DCTD	0
A_55_P2093679	2.45625	7.26846e-06	Zfp599	zinc finger protein 599	Mus musculus zinc finger protein 599 (Zfp599), mRNA [NM_181419]	NM_181419	NM_181419	235048	chr9	22051958	22051899	-	24683	117	164	A_55_P2093679	FALSE	Mm.292381	ENSMUST00000086281		ref|NM_181419|ens|ENSMUST00000086281|ref|XM_011242471|gb|BC050092	chr9:022051958-022051899	mm|9qA3	GO:0003674(molecular_function)|GO:0005575(cellular_component)|GO:0008150(biological_process)	CACGTGTGGTCCACAGATATCCATGCTGGTAAAATACTCATAACACATGAAATAAAAATA			0
A_51_P419017	2.4533	1.38987e-06	Pde10a	phosphodiesterase 10A	Mus musculus phosphodiesterase 10A (Pde10a), transcript variant 2, mRNA [NM_011866]	NM_011866	NM_011866	23984	chr17	9174995	9175054	+	21319	128	3	A_51_P419017	FALSE	Mm.87161	ENSMUST00000115717		ref|NM_011866|ref|NM_001290707|ens|ENSMUST00000115717|ens|ENSMUST00000089085	chr17:009174995-009175054	mm|17qA1	GO:0000166(nucleotide binding)|GO:0003824(catalytic activity)|GO:0004112(cyclic-nucleotide phosphodiesterase activity)|GO:0004114(3',5'-cyclic-nucleotide phosphodiesterase activity)|GO:0004118(cGMP-stimulated cyclic-nucleotide phosphodiesterase activity)|GO:0005737(cytoplasm)|GO:0006198(cAMP catabolic process)|GO:0007165(signal transduction)|GO:0008081(phosphoric diester hydrolase activity)|GO:00…	GAGAAATCCAAACTGTTGATTACAGGTGCACTACAGGTATGCTCTTTCAGTCTATCTGGG	10846	PDE10A	0
A_51_P383270	2.45239	0.000185634	Fras1	Fraser syndrome 1 homolog (human)	Mus musculus Fraser syndrome 1 homolog (human) (Fras1), mRNA [NM_175473]	NM_175473	NM_175473	231470	chr5	97213218	97213277	+	18001	138	79	A_51_P383270	FALSE	Mm.291120	ENSMUST00000036019		ref|NM_175473|ens|ENSMUST00000036019|ref|XM_006534873|gb|AK053608	chr5:097213218-097213277	mm|5qE3	GO:0002009(morphogenesis of an epithelium)|GO:0003338(metanephros morphogenesis)|GO:0005515(protein binding)|GO:0005604(basement membrane)|GO:0005886(plasma membrane)|GO:0007154(cell communication)|GO:0015031(protein transport)|GO:0016020(membrane)|GO:0016021(integral to membrane)|GO:0030326(embryonic limb morphogenesis)|GO:0043588(skin development)|GO:0046872(metal ion binding)|GO:0060021(palate…	TATTTCAGTGAAAGCTTTGCTTTCAGCGTTTCTTACTTCTTCACTAATGCCTTGTGTGTG	80144	FRAS1	0
A_55_P2116160	2.43737	0.000295535	Ccdc106	coiled-coil domain containing 106	Mus musculus coiled-coil domain containing 106 (Ccdc106), transcript variant 2, mRNA [NM_146178]	NM_146178	NM_146178	232821	chr7	5012314	5012373	+	33969	89	287	A_55_P2116160	FALSE	Mm.482157	ENSMUST00000149912		ref|NM_146178|ref|NM_001290432|ref|NM_001290429|ens|ENSMUST00000149912	chr7:005012314-005012373	mm|7qA1	GO:0003674(molecular_function)|GO:0005634(nucleus)|GO:0005654(nucleoplasm)|GO:0005730(nucleolus)|GO:0005737(cytoplasm)|GO:0008150(biological_process)	CATCTGCATCCCATGCAAAGACAGAGTATTATTCTGAGAGTTTAAATTAAAGAGACATGA	29903	CCDC106	0
A_51_P409452	2.43184	0.00216633	Cldn11	claudin 11	Mus musculus claudin 11 (Cldn11), mRNA [NM_008770]	NM_008770	NM_008770	18417	chr3	31062922	31062981	+	2715	184	148	A_51_P409452	FALSE	Mm.4425	ENSMUST00000046174		ref|NM_008770|ens|ENSMUST00000046174|gb|AK161698|gb|AK005171	chr3:031062922-031062981	mm|3qA3	GO:0005198(structural molecule activity)|GO:0005515(protein binding)|GO:0005886(plasma membrane)|GO:0005887(integral to plasma membrane)|GO:0005923(tight junction)|GO:0007155(cell adhesion)|GO:0007283(spermatogenesis)|GO:0008366(axon ensheathment)|GO:0016020(membrane)|GO:0016021(integral to membrane)|GO:0030054(cell junction)|GO:0043209(myelin sheath)|GO:0045178(basal part of cell)|GO:0070062(ext…	ATATGCAATAAATAATAGTACGAAGATTATAACTTTAACTGACTGCCCACGGTTTCCAGG	5010	CLDN11	0
A_51_P287198	2.42204	0.0023467	Krt23	keratin 23	Mus musculus keratin 23 (Krt23), mRNA [NM_033373]	NM_033373	NM_033373	94179	chr11	99339452	99339393	-	25868	114	89	A_51_P287198	FALSE	Mm.290657	ENSMUST00000006969		ref|NM_033373|ens|ENSMUST00000006969|gb|AK036901|gb|AK145247	chr11:099339452-099339393	mm|11qD	GO:0005198(structural molecule activity)|GO:0005882(intermediate filament)|GO:0008150(biological_process)	TCCGCGCTAATGGGTGAGTCTCGACGGAAATCCTTGGAGTTTTCAGATTCAGAAACTTTT	25984	KRT23	0
A_55_P2121516	2.42004	0.00110058	Ankfn1	ankyrin-repeat and fibronectin type III domain containing 1	Mus musculus ankyrin-repeat and fibronectin type III domain containing 1 (Ankfn1), mRNA [NM_001080933]	NM_001080933	NM_001080933	382543	chr11	89282459	89282400	-	39932	71	169	A_55_P2121516	FALSE	Mm.173249	ENSMUST00000169201		ref|NM_001080933|ens|ENSMUST00000169201|ref|XM_006533652|ref|XM_006536458	chr11:089282459-089282400	mm|11qC	GO:0003674(molecular_function)|GO:0005575(cellular_component)|GO:0008150(biological_process)	GGGTTTCTTAACCTCCCTCTTCAGATGTTTGAACTCGGTATAGTAGCTTGTTTCACCTAG			0
A_55_P1988760	2.41391	7.24482e-07	Sestd1	SEC14 and spectrin domains 1	Mus musculus SEC14 and spectrin domains 1 (Sestd1), mRNA [NM_175465]	NM_175465	NM_175465	228071	chr2	77024944	77024885	-	57637	17	183	A_55_P1988760	FALSE	Mm.27120	ENSMUST00000102659		ref|NM_175465|ens|ENSMUST00000102659|ens|ENSMUST00000102660|ref|XM_006499200	chr2:077024944-077024885	mm|2qC3	GO:0005546(phosphatidylinositol-4,5-bisphosphate binding)|GO:0010314(phosphatidylinositol-5-phosphate binding)|GO:0032266(phosphatidylinositol-3-phosphate binding)|GO:0034704(calcium channel complex)|GO:0043325(phosphatidylinositol-3,4-bisphosphate binding)|GO:0070273(phosphatidylinositol-4-phosphate binding)|GO:0070300(phosphatidic acid binding)|GO:0080025(phosphatidylinositol-3,5-bisphosphate b…	CTCGCTTTCACGCCGTACCTGACTTGTCAGTTTGTAGCCAAACAACCAATACTAAGCTTT	91404	SESTD1	0
A_55_P2324976	2.40936	0.00107253	5033406O09Rik	RIKEN cDNA 5033406O09 gene	Mus musculus RIKEN cDNA 5033406O09 gene (5033406O09Rik), long non-coding RNA [NR_029464]	NR_029464	NR_029464	77675	chr12	113180263	113180204	-	40872	68	257	A_55_P2324976	FALSE	Mm.98331			ref|NR_029464|gb|AK134157|riken|5830460G10	chr12:113180263-113180204	mm|12qF1		AGGGTCTGTAGATATATGTGTATTTCTCCTGAAATCGGGGAAAATAAACTCATTTTCTGA			0
A_52_P40695	2.40911	0.000170147	Fut9	fucosyltransferase 9	Mus musculus fucosyltransferase 9 (Fut9), mRNA [NM_010243]	NM_010243	NM_010243	14348	chr4	25547036	25546977	-	5340	176	146	A_52_P40695	FALSE	Mm.39101	ENSMUST00000108199		ref|NM_010243|ens|ENSMUST00000108199|ens|ENSMUST00000084770|gb|AK049122	chr4:025547036-025546977	mm|4qA3	GO:0000009(alpha-1,6-mannosyltransferase activity)|GO:0000026(alpha-1,2-mannosyltransferase activity)|GO:0000030(mannosyltransferase activity)|GO:0000033(alpha-1,3-mannosyltransferase activity)|GO:0001962(alpha-1,3-galactosyltransferase activity)|GO:0003980(UDP-glucose:glycoprotein glucosyltransferase activity)|GO:0004376(glycolipid mannosyltransferase activity)|GO:0004576(oligosaccharyl transfer…	CAATAAGTTGTACCTTAGTTACTTTAACTGGAGAAAGGATTTTACTGTAAACCTACCACG	10690	FUT9	0
A_55_P2081273	2.40756	0.00336809	Gabbr2	gamma-aminobutyric acid (GABA) B receptor, 2	Mus musculus gamma-aminobutyric acid (GABA) B receptor, 2 (Gabbr2), mRNA [NM_001081141]	NM_001081141	NM_001081141	242425	chr4	46677433	46677374	-	303	192	51	A_55_P2081273	FALSE	Mm.101909			ref|NM_001081141|gb|AK132744|tc|TC1636374|tc|TC1604208	chr4:046677433-046677374	mm|4qB1	GO:0004871(signal transducer activity)|GO:0004930(G-protein coupled receptor activity)|GO:0004965(G-protein coupled GABA receptor activity)|GO:0005515(protein binding)|GO:0005737(cytoplasm)|GO:0005886(plasma membrane)|GO:0005887(integral to plasma membrane)|GO:0007165(signal transduction)|GO:0007186(G-protein coupled receptor signaling pathway)|GO:0007214(gamma-aminobutyric acid signaling pathway…	TCTGCAAACAAAGAGGAGTTGGGATGTCAGAAACTTGCAAAAACAAATCAAACTCTAGAC	9568	GABBR2	0
A_51_P284608	2.40686	0.0829393	Cd74	CD74 antigen (invariant polypeptide of major histocompatibility complex, class II antigen-associated)	Mus musculus CD74 antigen (invariant polypeptide of major histocompatibility complex, class II antigen-associated) (Cd74), transcript variant 1, mRNA [NM_001042605]	NM_001042605	NM_001042605	16149	chr18	60972075	60972132	+	2380	185	162	A_51_P284608	FALSE	Mm.439737	ENSMUST00000167610		ref|NM_001042605|ref|NM_010545|ens|ENSMUST00000167610|ens|ENSMUST00000097563	chr18:060972075-060972132	mm|18qE1	GO:0000187(activation of MAPK activity)|GO:0001516(prostaglandin biosynthetic process)|GO:0001540(beta-amyloid binding)|GO:0001961(positive regulation of cytokine-mediated signaling pathway)|GO:0002376(immune system process)|GO:0002606(positive regulation of dendritic cell antigen processing and presentation)|GO:0002792(negative regulation of peptide secretion)|GO:0002821(positive regulation of a…	CTATAAAGGCCCGCAGACAGGGACAAGGGATGCCCTACCCTTAACCTAGGCTGGACACAT	972	CD74	0
A_52_P569375	2.40024	0.000512128	Fgf5	fibroblast growth factor 5	Mus musculus fibroblast growth factor 5 (Fgf5), transcript variant 1, mRNA [NM_010203]	NM_010203	NM_010203	14176	chr5	98705980	98706039	+	35365	85	119	A_52_P569375	FALSE	Mm.5055	ENSMUST00000031280		ref|NM_010203|ref|NM_001277268|ens|ENSMUST00000031280|gb|AK028694	chr5:098705980-098706039	mm|5qE3	GO:0005102(receptor binding)|GO:0005104(fibroblast growth factor receptor binding)|GO:0005576(extracellular region)|GO:0008083(growth factor activity)|GO:0008283(cell proliferation)|GO:0008284(positive regulation of cell proliferation)|GO:0008543(fibroblast growth factor receptor signaling pathway)|GO:0010001(glial cell differentiation)|GO:0023019(signal transduction involved in regulation of gen…	ATGGAGATCTATGAAGTATAAGTGTTCACCTTATATTCCTAAATGCTGCAATAAAGAGGC	2250	FGF5	0
A_52_P515880	2.3962	0.00385817	Vsnl1	visinin-like 1	Mus musculus visinin-like 1 (Vsnl1), mRNA [NM_012038]	NM_012038	NM_012038	26950	chr12	11332513	11332454	-	60148	9	82	A_52_P515880	FALSE	Mm.27005	ENSMUST00000072299		ref|NM_012038|ens|ENSMUST00000072299|gb|AK144454|gb|AK005091	chr12:011332513-011332454	mm|12qA1.1	GO:0005509(calcium ion binding)|GO:0005829(cytosol)|GO:0016020(membrane)|GO:0019722(calcium-mediated signaling)|GO:0035774(positive regulation of insulin secretion involved in cellular response to glucose stimulus)|GO:0045921(positive regulation of exocytosis)|GO:0046676(negative regulation of insulin secretion)|GO:0046872(metal ion binding)	AGAGCTGTTTTGGATGAATGCAGTATACAACTTAAAAATCCTGCTCAACTACTCATTAAG	7447	VSNL1	0
A_55_P2033425	2.39073	9.67783e-05	Grm5	glutamate receptor, metabotropic 5	Mus musculus glutamate receptor, metabotropic 5 (Grm5), transcript variant b, mRNA [NM_001143834]	NM_001143834	NM_001143834	108071	chr7	95282581	95282640	+	19179	134	20	A_55_P2033425	FALSE	Mm.235018	ENSMUST00000125009		ref|NM_001143834|ref|NM_001081414|ens|ENSMUST00000125009|ref|XM_011241643	chr7:095282581-095282640	mm|7qE1	GO:0000185(activation of MAPKKK activity)|GO:0001639(PLC activating G-protein coupled glutamate receptor activity)|GO:0002029(desensitization of G-protein coupled receptor protein signaling pathway)|GO:0004871(signal transducer activity)|GO:0004930(G-protein coupled receptor activity)|GO:0005515(protein binding)|GO:0005737(cytoplasm)|GO:0005886(plasma membrane)|GO:0005887(integral to plasma membr…	ATTGTATAATGGCTCTGCTGCAGTCTGTGACTTCCAAACCAGGAATTAAACACTCTTTTT	2915	GRM5	0
A_55_P2099790	2.39016	1.28495e-06	Nefh	neurofilament, heavy polypeptide	Mus musculus neurofilament, heavy polypeptide (Nefh), mRNA [NM_010904]	NM_010904	NM_010904	380684	chr11	4839455	4839396	-	51922	34	134	A_55_P2099790	FALSE	Mm.298283	ENSMUST00000093369		ref|NM_010904|ens|ENSMUST00000093369|gb|BC168406|gb|M35131	chr11:004839455-004839396	mm|11qA1	GO:0000226(microtubule cytoskeleton organization)|GO:0001552(ovarian follicle atresia)|GO:0005198(structural molecule activity)|GO:0005200(structural constituent of cytoskeleton)|GO:0005634(nucleus)|GO:0005737(cytoplasm)|GO:0005739(mitochondrion)|GO:0005882(intermediate filament)|GO:0005883(neurofilament)|GO:0007420(brain development)|GO:0015643(toxin binding)|GO:0019901(protein kinase binding)|G…	AGCAAACCCAAGACAGAAAAGGCTGAAAAATCCTCTAGCACAGACCAGAAAGAAAGCCAG	4744	NEFH	0
A_52_P296913	2.38419	9.72259e-08	Cnnm1	cyclin M1	Mus musculus cyclin M1 (Cnnm1), mRNA [NM_031396]	NM_031396	NM_031396	83674	chr19	43570116	43570175	+	24239	119	67	A_52_P296913	FALSE	Mm.329864	ENSMUST00000165311		ref|NM_031396|ens|ENSMUST00000165311|ref|XM_006527480|ref|XM_006527481	chr19:043570116-043570175	mm|19qC3	GO:0003674(molecular_function)|GO:0005886(plasma membrane)|GO:0006810(transport)|GO:0006811(ion transport)|GO:0008150(biological_process)|GO:0016020(membrane)|GO:0016021(integral to membrane)	GAGACGTCAGTTTGGGCTTCCCGAGTCTATAAGCTTGCTTCAGAAGAGGAGGTTCAGGGG	26507	CNNM1	0
A_55_P2376413	2.35926	0.000513472	4933408N05Rik	RIKEN cDNA 4933408N05 gene	Mus musculus RIKEN cDNA 4933408N05 gene (4933408N05Rik), long non-coding RNA [NR_045831]	NR_045831	NR_045831	71122	chr8	116865119	116865061	-	9048	165	273	A_55_P2376413	FALSE	Mm.437539			ref|NR_045831|gb|AK016745|riken|4933408N05|nap|NAP073507-1	chr8:116865119-116865061	mm|8qE1		AGATAGCACCCAGTGAAGCACCTTTCTGTTTTAGTTTGACAATAAATCTATTCTGTCTCT			0
A_52_P300940	2.34714	0.00408856	Lrba	LPS-responsive beige-like anchor	Mus musculus LPS-responsive beige-like anchor (Lrba), transcript variant 3, mRNA [NM_001077687]	NM_001077687	NM_001077687	80877	chr3	86550040	86550099	+	60089	9	200	A_52_P300940	FALSE	Mm.439825	ENSMUST00000192145		ref|NM_001077687|ens|ENSMUST00000192145|gb|AK035483|gb|AF188507	chr3:086550040-086550099	mm|3qF1	GO:0005543(phospholipid binding)|GO:0005622(intracellular)|GO:0005623(cell)|GO:0005764(lysosome)|GO:0005783(endoplasmic reticulum)|GO:0005794(Golgi apparatus)|GO:0005802(trans-Golgi network)|GO:0005886(plasma membrane)|GO:0007165(signal transduction)|GO:0008104(protein localization)|GO:0012505(endomembrane system)|GO:0016020(membrane)|GO:0016021(integral to membrane)|GO:0016023(cytoplasmic membra…	ATTGAGAATGCGCATGAAGTACTGTCAGGATAATATTGGATCTTTTCATCACTCAGACTT	987	LRBA	0
A_52_P173442	2.34612	6.33459e-05	Wscd2	WSC domain containing 2	Mus musculus WSC domain containing 2 (Wscd2), mRNA [NM_177292]	NM_177292	NM_177292	320916	chr5	114039596	114039655	+	20736	129	186	A_52_P173442	FALSE	Mm.102783	ENSMUST00000181294		ref|NM_177292|ens|ENSMUST00000181294|ens|ENSMUST00000094452|gb|AK030181	chr5:114039596-114039655	mm|5qF	GO:0003674(molecular_function)|GO:0005575(cellular_component)|GO:0008150(biological_process)|GO:0016020(membrane)|GO:0016021(integral to membrane)	TGGCCTCCTCTGGTCACGAACTTTCTGTTCGAAGATTCCTCAGGTCAACACTATCATTAA	9671	WSCD2	0
A_52_P462472	2.34486	5.25607e-06	C77370	expressed sequence C77370	Mus musculus expressed sequence C77370 (C77370), mRNA [NM_001077354]	NM_001077354	NM_001077354	245555	chrX	101279518	101279459	-	61936	4	113	A_52_P462472	FALSE	Mm.381907	ENSMUST00000056502		ref|NM_001077354|ens|ENSMUST00000056502|ens|ENSMUST00000087879|ens|ENSMUST00000118314	chrX:101279518-101279459	mm|XqD	GO:0003887(DNA-directed DNA polymerase activity)|GO:0006261(DNA-dependent DNA replication)|GO:0007275(multicellular organismal development)|GO:0007399(nervous system development)|GO:0016035(zeta DNA polymerase complex)|GO:0042276(error-prone translesion synthesis)	GAAAAAGGTTACTAATGGGTCTTCAGGAGCTACTAAGAATCACAGGTCAGTCAAAGCTGT	340533	KIAA2022	0
A_52_P594302	2.343	0.00101857	Lrba	LPS-responsive beige-like anchor	Mus musculus LPS-responsive beige-like anchor (Lrba), transcript variant 2, mRNA [NM_001077688]	NM_001077688	NM_001077688	80877	chr3	86580314	86580373	+	25907	114	11	A_52_P594302	FALSE	Mm.439825	ENSMUST00000194759		ref|NM_001077688|ens|ENSMUST00000194759|gb|AF188506|tc|TC1669010	chr3:086580314-086580373	mm|3qF1	GO:0005543(phospholipid binding)|GO:0005622(intracellular)|GO:0005623(cell)|GO:0005764(lysosome)|GO:0005783(endoplasmic reticulum)|GO:0005794(Golgi apparatus)|GO:0005802(trans-Golgi network)|GO:0005886(plasma membrane)|GO:0007165(signal transduction)|GO:0008104(protein localization)|GO:0012505(endomembrane system)|GO:0016020(membrane)|GO:0016021(integral to membrane)|GO:0016023(cytoplasmic membra…	ACTGACTGATGTCCCATAGCTGATTCTAGCCATACCATTTCCTCTAAGTGCTACCTAACA	987	LRBA	0
A_66_P113268	2.34133	0.00286012	Mme	membrane metallo endopeptidase	Mus musculus membrane metallo endopeptidase (Mme), transcript variant 1, mRNA [NM_001289462]	NM_001289462	NM_001289462	17380	chr3	63185750	63185809	+	53152	30	298	A_66_P113268	FALSE	Mm.296022			ref|NM_001289462|ref|NM_001289463|ref|NM_008604|ref|XM_006501095	chr3:063185750-063185809	mm|3qE1	GO:0004175(endopeptidase activity)|GO:0004222(metalloendopeptidase activity)|GO:0005737(cytoplasm)|GO:0005886(plasma membrane)|GO:0005903(brush border)|GO:0005925(focal adhesion)|GO:0006508(proteolysis)|GO:0006518(peptide metabolic process)|GO:0008021(synaptic vesicle)|GO:0008233(peptidase activity)|GO:0008237(metallopeptidase activity)|GO:0008238(exopeptidase activity)|GO:0008270(zinc ion bindin…	AACACTGTAGCTTTCTGCCATCATCATATAACTGCTAGGCATACATTATCCAGATCTCCA	4311	MME	0
A_51_P160344	2.33096	3.13337e-07	Cenpv	centromere protein V	Mus musculus centromere protein V (Cenpv), mRNA [NM_028448]	NM_028448	NM_028448	73139	chr11	62338546	62338487	-	6899	171	308	A_51_P160344	FALSE	Mm.390409	ENSMUST00000135497		ref|NM_028448|ens|ENSMUST00000135497|ens|ENSMUST00000018653|ref|XM_006534333	chr11:062338546-062338487	mm|11qB2	GO:0000775(chromosome, centromeric region)|GO:0000776(kinetochore)|GO:0001667(ameboidal cell migration)|GO:0003674(molecular_function)|GO:0005634(nucleus)|GO:0005654(nucleoplasm)|GO:0005694(chromosome)|GO:0005737(cytoplasm)|GO:0005856(cytoskeleton)|GO:0007049(cell cycle)|GO:0007067(mitosis)|GO:0008152(metabolic process)|GO:0015630(microtubule cytoskeleton)|GO:0016846(carbon-sulfur lyase activity)…	TCTGCCTTAACCCAGGTTTCGTGTAAGAAACTTAACCTTCTCCCTTCCTACCAATTTTTG	201161	CENPV	0
A_52_P496403	2.32433	0.000310651	1700001O22Rik	RIKEN cDNA 1700001O22 gene	Mus musculus RIKEN cDNA 1700001O22 gene (1700001O22Rik), transcript variant 1, mRNA [NM_198000]	NM_198000	NM_198000	73598	chr2	30652053	30651994	-	23363	121	180	A_52_P496403	FALSE	Mm.34166	ENSMUST00000135556		ref|NM_198000|ref|NR_028487|ref|NR_028486|ens|ENSMUST00000135556	chr2:030652053-030651994	mm|2qB	GO:0003674(molecular_function)|GO:0005575(cellular_component)|GO:0008150(biological_process)	CTTTGCCAGCTGTATCTGTGTCAGAACGGGTGCTCGGGAGTGTTGGGAGATGGTTGGACA	375759	C9orf50	0
A_55_P2090484	2.32263	3.6991e-05	Pde10a	phosphodiesterase 10A	Mus musculus phosphodiesterase 10A (Pde10a), transcript variant 1, mRNA [NM_001290707]	NM_001290707	NM_001290707	23984	chr17	9174477	9174536	+	19379	133	276	A_55_P2090484	FALSE	Mm.87161	ENSMUST00000115717		ref|NM_001290707|ref|NM_011866|ens|ENSMUST00000115717|ens|ENSMUST00000089085	chr17:009174477-009174536	mm|17qA1	GO:0000166(nucleotide binding)|GO:0003824(catalytic activity)|GO:0004112(cyclic-nucleotide phosphodiesterase activity)|GO:0004114(3',5'-cyclic-nucleotide phosphodiesterase activity)|GO:0004118(cGMP-stimulated cyclic-nucleotide phosphodiesterase activity)|GO:0005737(cytoplasm)|GO:0006198(cAMP catabolic process)|GO:0007165(signal transduction)|GO:0008081(phosphoric diester hydrolase activity)|GO:00…	AGCAAGAGCACACCTGAGAAGCTGAACGTGAAGGTTGAAGACTGATCCTGAAGTGACGTC	10846	PDE10A	0
A_55_P2012444	2.31966	0.0054333	Tnfrsf19	tumor necrosis factor receptor superfamily, member 19	Mus musculus tumor necrosis factor receptor superfamily, member 19 (Tnfrsf19), transcript variant 1, mRNA [NM_013869]	NM_013869	NM_013869	29820	chr14	61589726	61589667	-	6890	171	326	A_55_P2012444	FALSE	Mm.281356	ENSMUST00000111234		ref|NM_013869|ref|NM_001164155|ens|ENSMUST00000111234|ens|ENSMUST00000111236	chr14:061589726-061589667	mm|14qD1	GO:0001942(hair follicle development)|GO:0005576(extracellular region)|GO:0005886(plasma membrane)|GO:0016020(membrane)|GO:0016021(integral to membrane)|GO:0043123(positive regulation of I-kappaB kinase/NF-kappaB cascade)	AAGCCAAGGAGGCTGGGAAGACAGGGAAAACCTGAATCTAGCCATGCCCACAGCCTTCCA	55504	TNFRSF19	0
A_55_P1971630	2.30489	0.000953671	Zfp819	zinc finger protein 819	Mus musculus zinc finger protein 819 (Zfp819), mRNA [NM_028913]	NM_028913	NM_028913	74400	chr7	50873521	50873580	+	5346	176	134	A_55_P1971630	FALSE	Mm.159188	ENSMUST00000032661		ref|NM_028913|ens|ENSMUST00000032661|gb|AK015213|gb|AK016669	chr7:050873521-050873580	mm|7qB4	GO:0005515(protein binding)|GO:0008150(biological_process)	CTGTGAAAGGCTTTACCACAAAGTCAATTCCTCATCCATGTTTTTAAATAAAGAGACCTA			0
A_66_P137501	2.3032	0.00261319	Syndig1	synapse differentiation inducing 1	Mus musculus synapse differentiation inducing 1 (Syndig1), mRNA [NM_001085521]	NM_001085521	NM_001085521	433485	chr2	149725275	149725334	+	27180	110	89	A_66_P137501	FALSE	Mm.330649	ENSMUST00000144179		ref|NM_001085521|ens|ENSMUST00000144179|ens|ENSMUST00000137280|ens|ENSMUST00000140870	chr2:149725275-149725334	mm|2qG3	GO:0000139(Golgi membrane)|GO:0005768(endosome)|GO:0005886(plasma membrane)|GO:0005887(integral to plasma membrane)|GO:0006886(intracellular protein transport)|GO:0009607(response to biotic stimulus)|GO:0014069(postsynaptic density)|GO:0016020(membrane)|GO:0016021(integral to membrane)|GO:0030054(cell junction)|GO:0031901(early endosome membrane)|GO:0035254(glutamate receptor binding)|GO:0042803(…	AGATCAGTGATGCTGGCAAAAGGAATGGCTTAATTAACACCAGAAACTTCATGGCTGAGA	79953	SYNDIG1	0
A_55_P2040200	2.29815	0.00678469	Lrba	LPS-responsive beige-like anchor	Mus musculus LPS-responsive beige-like anchor (Lrba), transcript variant 1, mRNA [NM_030695]	NM_030695	NM_030695	80877	chr3	86585524	86585583	+	29155	104	75	A_55_P2040200	FALSE	Mm.439825	ENSMUST00000107635		ref|NM_030695|ens|ENSMUST00000107635|ref|XM_006502347|ref|XM_006502349	chr3:086585524-086585583	mm|3qF1	GO:0005543(phospholipid binding)|GO:0005622(intracellular)|GO:0005623(cell)|GO:0005764(lysosome)|GO:0005783(endoplasmic reticulum)|GO:0005794(Golgi apparatus)|GO:0005802(trans-Golgi network)|GO:0005886(plasma membrane)|GO:0007165(signal transduction)|GO:0008104(protein localization)|GO:0012505(endomembrane system)|GO:0016020(membrane)|GO:0016021(integral to membrane)|GO:0016023(cytoplasmic membra…	ATTGTCCTGTTTTACAATGACTTTAACCGCTGGCATCATGAGTACCAGACCCGCTACTGA	987	LRBA	0
A_51_P226542	2.29243	2.95316e-06	Rpusd2	RNA pseudouridylate synthase domain containing 2	Mus musculus RNA pseudouridylate synthase domain containing 2 (Rpusd2), mRNA [NM_173450]	NM_173450	NM_173450	271842	chr2	118865439	118865498	+	21089	128	136	A_51_P226542	FALSE	Mm.33617	ENSMUST00000028796		ref|NM_173450|ens|ENSMUST00000028796|gb|AK044767|tc|TC1582508	chr2:118865439-118865498	mm|2qE5	GO:0001522(pseudouridine synthesis)|GO:0003723(RNA binding)|GO:0005575(cellular_component)|GO:0009451(RNA modification)|GO:0009982(pseudouridine synthase activity)	TTGTTTATTATTTATTCTGGACATAAAATCTTAACAAAAGAATTAACAGCCCAATTACAA	27079	RPUSD2	0
A_52_P380263	2.28796	0.000536957	Podxl	podocalyxin-like	Mus musculus podocalyxin-like (Podxl), mRNA [NM_013723]	NM_013723	NM_013723	27205	chr6	31470464	31470405	-	14397	149	71	A_52_P380263	FALSE	Mm.89918	ENSMUST00000026698		ref|NM_013723|ens|ENSMUST00000026698|gb|AF290209|gb|BC052442	chr6:031470464-031470405	mm|6qA3.3	GO:0005886(plasma membrane)|GO:0007155(cell adhesion)|GO:0007162(negative regulation of cell adhesion)|GO:0016020(membrane)|GO:0016021(integral to membrane)|GO:0016324(apical plasma membrane)|GO:0016477(cell migration)|GO:0022407(regulation of cell-cell adhesion)|GO:0022408(negative regulation of cell-cell adhesion)|GO:0031528(microvillus membrane)|GO:0032534(regulation of microvillus assembly)|G…	TGTAAATACAAGAGCCACATGTTTATTTACCTTGTACTACTTTCAGAGAGTAAACTTGGG	5420	PODXL	0
A_52_P529195	2.28753	4.68476e-05	Pcdhb4	protocadherin beta 4	Mus musculus protocadherin beta 4 (Pcdhb4), mRNA [NM_053129]	NM_053129	NM_053129	93875	chr18	37470024	37470083	+	16074	143	326	A_52_P529195	FALSE	Mm.196711	ENSMUST00000056712		ref|NM_053129|ens|ENSMUST00000056712|gb|AK036169|gb|BC053098	chr18:037470024-037470083	mm|18qB3	GO:0003674(molecular_function)	GTGGTGCTTGCATACATGTAGATTGTGTACTTTGATCATACTCATCCCTGATCATCAGTC	26167	PCDHB5	0
A_52_P472523	2.27566	0.0294866	Sacs	sacsin	Mus musculus 0 day neonate eyeball cDNA, RIKEN full-length enriched library, clone:E130115J16 product:hypothetical ATPase domain of HSP90 chaperone/DNA topoisomerase II/histidine kinase structure containing protein, full insert sequence. [AK053626]		AK053626	50720	chr14	61814259	61814318	+	44136	58	289	A_52_P472523	FALSE	Mm.446687	ENSMUST00000121091		gb|AK053626|ens|ENSMUST00000121091|tc|TC1607541|riken|E130115J16	chr14:61814259-61814318	mm|14qD1	GO:0005737(cytoplasm)|GO:0050750(low-density lipoprotein particle receptor binding)	ACACTTTAAGGTTCATGCTCAGTTATTGTTTTAAACCTACGAGAACACTTTCTCAATCTG	26278	SACS	0
A_55_P2053181	2.27459	1.32116e-06	Nefh	neurofilament, heavy polypeptide	Mus musculus neurofilament, heavy polypeptide (Nefh), mRNA [NM_010904]	NM_010904	NM_010904	380684	chr11	4838817	4838758	-	26994	110	134	A_55_P2053181	FALSE	Mm.298283	ENSMUST00000093369		ref|NM_010904|ens|ENSMUST00000093369|gb|M35131|gb|AK122388	chr11:004838817-004838758	mm|11qA1	GO:0000226(microtubule cytoskeleton organization)|GO:0001552(ovarian follicle atresia)|GO:0005198(structural molecule activity)|GO:0005200(structural constituent of cytoskeleton)|GO:0005634(nucleus)|GO:0005737(cytoplasm)|GO:0005739(mitochondrion)|GO:0005882(intermediate filament)|GO:0005883(neurofilament)|GO:0007420(brain development)|GO:0015643(toxin binding)|GO:0019901(protein kinase binding)|G…	TCCACTGAAGTCCACTTTCAATTGCTTCCATGCAATAAAACCAAGTGCTTCTGAAATAAA	4744	NEFH	0
A_51_P246317	2.27386	0.000323186	Mt2	metallothionein 2	Mus musculus metallothionein 2 (Mt2), mRNA [NM_008630]	NM_008630	NM_008630	17750	chr8	96697371	96697430	+	54857	25	168	A_51_P246317	FALSE	Mm.147226	ENSMUST00000034214		ref|NM_008630|ens|ENSMUST00000034214|gb|AK002567|gb|BC031758	chr8:096697371-096697430	mm|8qC5	GO:0005622(intracellular)|GO:0005623(cell)|GO:0006882(cellular zinc ion homeostasis)|GO:0007263(nitric oxide mediated signal transduction)|GO:0008270(zinc ion binding)|GO:0010273(detoxification of copper ion)|GO:0046872(metal ion binding)	AGAAGCCTAGCCTTTTTTGTACAACCCTGACTCGTTCTCCACAACTTTTTCTATAAAGCA	4501	MT1X	0
A_55_P1993775	2.26501	0.0757604	Vti1a	vesicle transport through interaction with t-SNAREs 1A	Mus musculus vesicle transport through interaction with t-SNAREs 1A (Vti1a), transcript variant 2, mRNA [NM_016862]	NM_016862	NM_016862	53611	chr19	55390705	55390764	+	15306	146	221	A_55_P1993775	FALSE	Mm.258637			ref|NM_016862|ref|NM_001293686|ref|NM_001293685|ref|XM_006527198	chr19:055390705-055390764	mm|19qD2	GO:0000149(SNARE binding)|GO:0005484(SNAP receptor activity)|GO:0005789(endoplasmic reticulum membrane)|GO:0005794(Golgi apparatus)|GO:0006623(protein targeting to vacuole)|GO:0006810(transport)|GO:0006886(intracellular protein transport)|GO:0006888(ER to Golgi vesicle-mediated transport)|GO:0006891(intra-Golgi vesicle-mediated transport)|GO:0006896(Golgi to vacuole transport)|GO:0008021(synaptic…	TTCTTTAGTTTTACGTTCGAAGATTTGGGTGGAAAGGAAAAGGCGCAGGCAGCGCAGTTT	143187	VTI1A	0
A_55_P2062449	2.26145	0.00330901	Pde6a	phosphodiesterase 6A, cGMP-specific, rod, alpha	Mus musculus phosphodiesterase 6A, cGMP-specific, rod, alpha (Pde6a), mRNA [NM_146086]	NM_146086	NM_146086	225600	chr18	61449307	61449366	+	44428	57	34	A_55_P2062449	FALSE	Mm.391106	ENSMUST00000025468		ref|NM_146086|ens|ENSMUST00000025468|gb|BC044892	chr18:061449307-061449366	mm|18qE1	GO:0004114(3',5'-cyclic-nucleotide phosphodiesterase activity)|GO:0005623(cell)|GO:0005829(cytosol)|GO:0005886(plasma membrane)|GO:0007165(signal transduction)|GO:0007601(visual perception)|GO:0008081(phosphoric diester hydrolase activity)|GO:0016020(membrane)|GO:0016787(hydrolase activity)|GO:0045494(photoreceptor cell maintenance)|GO:0046037(GMP metabolic process)|GO:0046872(metal ion binding)|…	AGCCTGGTTTACACAGAAAGTTCCAGGCTGGGCTACAGTATGCTACCTTGTTTCAAACAA	5145	PDE6A	0
A_52_P465980	2.25375	0.000621288	Cplx1	complexin 1	Mus musculus complexin 1 (Cplx1), mRNA [NM_007756]	NM_007756	NM_007756	12889	chr5	108947954	108947895	-	44788	56	297	A_52_P465980	FALSE	Mm.5195	ENSMUST00000046892		ref|NM_007756|ens|ENSMUST00000046892|gb|AK159026|gb|AK134820	chr5:108947954-108947895	mm|5qF	GO:0000149(SNARE binding)|GO:0005326(neurotransmitter transporter activity)|GO:0005623(cell)|GO:0005737(cytoplasm)|GO:0006810(transport)|GO:0006836(neurotransmitter transport)|GO:0006887(exocytosis)|GO:0016079(synaptic vesicle exocytosis)|GO:0017075(syntaxin-1 binding)|GO:0019905(syntaxin binding)|GO:0030073(insulin secretion)|GO:0030425(dendrite)|GO:0031201(SNARE complex)|GO:0043025(neuronal cel…	CCAGGTGTGTGGCTTAGCATTGACCTTCATGACCTTACATAGCTCTTTAGAGAAGCCATA	10815	CPLX1	0
A_51_P171107	2.25185	5.54841e-06	Tmem35	transmembrane protein 35	Mus musculus transmembrane protein 35 (Tmem35), mRNA [NM_026239]	NM_026239	NM_026239	67564	chrX	130840254	130840313	+	14973	147	231	A_51_P171107	FALSE	Mm.41489	ENSMUST00000037687		ref|NM_026239|ens|ENSMUST00000037687|gb|AK042538|gb|AK005180	chrX:130840254-130840313	mm|XqE3	GO:0003674(molecular_function)|GO:0005575(cellular_component)|GO:0005777(peroxisome)|GO:0008150(biological_process)|GO:0016020(membrane)|GO:0016021(integral to membrane)|GO:0031410(cytoplasmic vesicle)	AGTTTAGCTGGGGGAGGGACATTTGACTTGGGTTAGTTGGATTGACCAGTATGGAAATTT	59353	TMEM35A	0
A_55_P2031352	2.2498	0.00392526	Ppp3r2	protein phosphatase 3, regulatory subunit B, alpha isoform (calcineurin B, type II)	Mus musculus protein phosphatase 3, regulatory subunit B, alpha isoform (calcineurin B, type II) (Ppp3r2), mRNA [NM_001004025]	NM_001004025	NM_001004025	19059	chr4	49691706	49691647	-	58011	16	91	A_55_P2031352	FALSE	Mm.46125	ENSMUST00000029991		ref|NM_001004025|ens|ENSMUST00000029991|gb|AK029998|tc|TC1580052	chr4:049691706-049691647	mm|4qB1	GO:0004723(calcium-dependent protein serine/threonine phosphatase activity)|GO:0005509(calcium ion binding)|GO:0005977(glycogen metabolic process)|GO:0006952(defense response)|GO:0007321(sperm displacement)|GO:0016311(dephosphorylation)|GO:0046872(metal ion binding)	CTGGTAAGAAGAACAGAAAGATTGAAGGCCACAAAGACTGAGTTTGCTTTCTATTATATT			0
A_52_P123693	2.24539	0.0302179	E130304I02Rik	RIKEN cDNA E130304I02 gene	Mus musculus RIKEN cDNA E130304I02 gene (E130304I02Rik), long non-coding RNA [NR_033567]	NR_033567	NR_033567	78547	chr7	36587932	36587991	+	43527	60	195	A_52_P123693	FALSE	Mm.406883			ref|NR_033567|gb|AK021412|tc|TC1623952|tc|TC1701670	chr7:36587932-36587991	mm|7qB2	GO:0003674(molecular_function)|GO:0005575(cellular_component)|GO:0008150(biological_process)	GCCTCGCTCCCGACTCCTTTCCCTCTCTTTCCCCCTTTTTGCCCCTTCCTCGGCCGTGGC			0
A_51_P279437	2.24001	1.16626e-05	Mfsd2a	major facilitator superfamily domain containing 2A	Mus musculus major facilitator superfamily domain containing 2A (Mfsd2a), mRNA [NM_029662]	NM_029662	NM_029662	76574	chr4	122624241	122624182	-	32651	93	299	A_51_P279437	FALSE	Mm.331842	ENSMUST00000030408		ref|NM_029662|ens|ENSMUST00000030408|ens|ENSMUST00000152308|ref|XM_006503477	chr4:122624241-122624182	mm|4qD2.2	GO:0005548(phospholipid transporter activity)|GO:0005737(cytoplasm)|GO:0005783(endoplasmic reticulum)|GO:0005886(plasma membrane)|GO:0005887(integral to plasma membrane)|GO:0006810(transport)|GO:0006869(lipid transport)|GO:0015293(symporter activity)|GO:0015908(fatty acid transport)|GO:0015914(phospholipid transport)|GO:0016020(membrane)|GO:0016021(integral to membrane)|GO:0045056(transcytosis)|G…	CTGACTGGGCCTAGCTCGGAACACTAATGTAGAAACGTTTTATACAGAGACTAATTAATA	84879	MFSD2A	0
A_52_P63905	2.23759	0.0351221	Ddc	dopa decarboxylase	Mus musculus dopa decarboxylase (Ddc), transcript variant 2, mRNA [NM_016672]	NM_016672	NM_016672	13195	chr11	11776321	11776262	-	13739	151	75	A_52_P63905	FALSE	Mm.12906	ENSMUST00000134121		ref|NM_016672|ref|NM_001190448|ens|ENSMUST00000134121|ens|ENSMUST00000145033	chr11:011776321-011776262	mm|11qA1	GO:0003824(catalytic activity)|GO:0004058(aromatic-L-amino-acid decarboxylase activity)|GO:0005737(cytoplasm)|GO:0006520(cellular amino acid metabolic process)|GO:0008021(synaptic vesicle)|GO:0009636(response to toxin)|GO:0015842(synaptic vesicle amine transport)|GO:0016597(amino acid binding)|GO:0016829(lyase activity)|GO:0016831(carboxy-lyase activity)|GO:0019752(carboxylic acid metabolic proce…	CCACGGCTAGCTCATACCCAGCTATGCTTGCAGACATGCTGTGTGGTGCTATTGGCTGCA	1644	DDC	0
A_55_P1989321	2.23402	0.000344604	Sat1	spermidine/spermine N1-acetyl transferase 1	Mus musculus spermidine/spermine N1-acetyl transferase 1 (Sat1), transcript variant 2, mRNA [NM_001291865]	NM_001291865	NM_001291865	20229	chrX	151647915	151647856	-	61406	5	190	A_55_P1989321	FALSE	Mm.2734	ENSMUST00000150046		ref|NM_001291865|ref|NM_009121|ens|ENSMUST00000150046|ens|ENSMUST00000138944	chr5:030120934-030120875	mm|5qB1	GO:0004145(diamine N-acetyltransferase activity)|GO:0005622(intracellular)|GO:0005737(cytoplasm)|GO:0005829(cytosol)|GO:0006595(polyamine metabolic process)|GO:0006598(polyamine catabolic process)|GO:0008080(N-acetyltransferase activity)|GO:0016740(transferase activity)|GO:0016746(transferase activity, transferring acyl groups)|GO:0019809(spermidine binding)|GO:0032918(spermidine acetylation)|GO:…	GTGACGTTGTTGCATGTTTGAAATTCAGTCTGTTTAAAGTGGCAGTCATGTATGTGGTTT	6303	SAT1	0
A_55_P1978293	2.23177	0.000778274	Micalcl	MICAL C-terminal like	Mus musculus MICAL C-terminal like (Micalcl), mRNA [NM_027587]	NM_027587	NM_027587	100504195	chr7	119538328	119538387	+	20391	130	220	A_55_P1978293	FALSE	Mm.291129	ENSMUST00000051308		ref|NM_027587|ens|ENSMUST00000051308|gb|BC031386|gb|AK014911	chr7:119538328-119538387	mm|7qF1	GO:0005737(cytoplasm)|GO:0007275(multicellular organismal development)|GO:0007283(spermatogenesis)|GO:0030154(cell differentiation)|GO:0051019(mitogen-activated protein kinase binding)	GAGGAAGCTGGAAAAGCAGTCAGCTAAGCAAGAAGAATTGAAAAGACTCCATAAGGCTCA	84953	MICALCL	0
A_52_P586944	2.23139	0.000110789	Bmpr1b	bone morphogenetic protein receptor, type 1B	Mus musculus bone morphogenetic protein receptor, type 1B (Bmpr1b), transcript variant 1, mRNA [NM_007560]	NM_007560	NM_007560	12167	chr3	141500753	141500694	-	53323	30	283	A_52_P586944	FALSE	Mm.39089			ref|NM_007560|ref|NM_001277220|ref|NM_001277218|ref|NM_001277217	chr3:141500753-141500694	mm|3qH1	GO:0000166(nucleotide binding)|GO:0001501(skeletal system development)|GO:0001502(cartilage condensation)|GO:0001550(ovarian cumulus expansion)|GO:0001654(eye development)|GO:0001948(glycoprotein binding)|GO:0002062(chondrocyte differentiation)|GO:0004672(protein kinase activity)|GO:0004674(protein serine/threonine kinase activity)|GO:0004675(transmembrane receptor protein serine/threonine kinase…	ATTTATGGAAGCATGTACATTGTGAACTCCCAAATGAAAAGCAGTTAAACAGTGTGTATG	658	BMPR1B	0
A_65_P16208	2.2289	0.00335145	Baz1a	bromodomain adjacent to zinc finger domain 1A	Mus musculus bromodomain adjacent to zinc finger domain 1A (Baz1a), mRNA [NM_013815]	NM_013815	NM_013815	217578	chr12	55999368	55997144	-	16050	144	45	A_65_P16208	FALSE	Mm.479583	ENSMUST00000173433		ref|NM_013815|ens|ENSMUST00000173433|ens|ENSMUST00000038926|gb|AK047427	unmapped		GO:0000228(nuclear chromosome)|GO:0005515(protein binding)|GO:0005634(nucleus)|GO:0006261(DNA-dependent DNA replication)|GO:0006338(chromatin remodeling)|GO:0006351(transcription, DNA-dependent)|GO:0006355(regulation of transcription, DNA-dependent)|GO:0008270(zinc ion binding)|GO:0008623(chromatin accessibility complex)|GO:0046872(metal ion binding)	GCATAGTGAATCTAAGAGAAGAGGCAGGAAAAGACAATCTACAGAGTCATCTCCTGTACC	11177	BAZ1A	0
A_51_P442642	2.2253	0.0403051	Cadm2	cell adhesion molecule 2	Mus musculus cell adhesion molecule 2 (Cadm2), transcript variant 1, mRNA [NM_178721]	NM_178721	NM_178721	239857	chr16	66661606	66661547	-	36654	81	165	A_51_P442642	FALSE	Mm.394300	ENSMUST00000114292		ref|NM_178721|ref|NM_001145977|ens|ENSMUST00000114292|ref|XM_011246128	chr16:066661606-066661547	mm|16qC1.3	GO:0005515(protein binding)|GO:0005737(cytoplasm)|GO:0005886(plasma membrane)|GO:0007155(cell adhesion)|GO:0016020(membrane)|GO:0016021(integral to membrane)|GO:0030054(cell junction)|GO:0030424(axon)|GO:0032809(neuronal cell body membrane)|GO:0042995(cell projection)|GO:0045202(synapse)	ATTTGCGGGGAAGAAGGATGATTGAATACAACATCCTATGCTAATAACAACACGAGGACA	253559	CADM2	0
A_52_P233441	2.22274	0.00344639	Gata2	GATA binding protein 2	Mus musculus GATA binding protein 2 (Gata2), mRNA [NM_008090]	NM_008090	NM_008090	14461	chr6	88156362	88156421	+	5665	175	152	A_52_P233441	FALSE	Mm.491156	ENSMUST00000015197		ref|NM_008090|ens|ENSMUST00000015197|ens|ENSMUST00000170089|ref|XM_006505539	chr6:088156362-088156421	mm|6qD1	GO:0000122(negative regulation of transcription from RNA polymerase II promoter)|GO:0000980(RNA polymerase II distal enhancer sequence-specific DNA binding)|GO:0001077(RNA polymerase II core promoter proximal region sequence-specific DNA binding transcription factor activity involved in positive regulation of transcription)|GO:0001158(enhancer sequence-specific DNA binding)|GO:0001655(urogenital …	AACTGCATAAGCTTAACCCGCTGATGAGTGGTTTTATTTTGAAACTCGTTTTTTGGGTCC	2624	GATA2	0
A_55_P2100305	2.22064	0.000165907	Lrba	LPS-responsive beige-like anchor	Mus musculus LPS-responsive beige-like anchor (Lrba), transcript variant 1, mRNA [NM_030695]	NM_030695	NM_030695	80877	chr3	86586424	86586483	+	42387	63	180	A_55_P2100305	FALSE	Mm.439825	ENSMUST00000107635		ref|NM_030695|ens|ENSMUST00000107635|ref|XM_006502347|ref|XM_006502349	chr3:086586424-086586483	mm|3qF1	GO:0005543(phospholipid binding)|GO:0005622(intracellular)|GO:0005623(cell)|GO:0005764(lysosome)|GO:0005783(endoplasmic reticulum)|GO:0005794(Golgi apparatus)|GO:0005802(trans-Golgi network)|GO:0005886(plasma membrane)|GO:0007165(signal transduction)|GO:0008104(protein localization)|GO:0012505(endomembrane system)|GO:0016020(membrane)|GO:0016021(integral to membrane)|GO:0016023(cytoplasmic membra…	GCACCCACCTTACCCCTATTTGTTATGAAGCTATCTTTACCTTCCTTTTGACTAGTAATT	987	LRBA	0
A_55_P2263277	2.21664	9.72259e-08	A930019D19Rik	RIKEN cDNA A930019D19 gene	Mus musculus RIKEN cDNA A930019D19 gene (A930019D19Rik), long non-coding RNA [NR_040619]	NR_040619	NR_040619	77806	chr2	146092807	146092866	+	25967	113	220	A_55_P2263277	FALSE	Mm.392819			ref|NR_040619|gb|AK020875|tc|TC1621358|riken|A930019D19	chr2:146092807-146092866	mm|2qG1		GATTAAATAGGAATACATGTGGACTTCTAGCTCTATCATCAGCTTGCTACGTGAAAAATT			0
A_66_P136389	2.21648	0.000297053	Bmpr1b	bone morphogenetic protein receptor, type 1B	Mus musculus bone morphogenetic protein receptor, type 1B (Bmpr1b), transcript variant 1, mRNA [NM_007560]	NM_007560	NM_007560	12167	chr3	141503433	141503374	-	60981	7	55	A_66_P136389	FALSE	Mm.39089			ref|NM_007560|ref|NM_001277220|ref|NM_001277218|ref|NM_001277217	chr3:141503433-141503374	mm|3qH1	GO:0000166(nucleotide binding)|GO:0001501(skeletal system development)|GO:0001502(cartilage condensation)|GO:0001550(ovarian cumulus expansion)|GO:0001654(eye development)|GO:0001948(glycoprotein binding)|GO:0002062(chondrocyte differentiation)|GO:0004672(protein kinase activity)|GO:0004674(protein serine/threonine kinase activity)|GO:0004675(transmembrane receptor protein serine/threonine kinase…	ATCATGGCTTTCTGAGGAGGAGAAACTGTTTGGGTAACTTGTTCAAGATATGATGCATGT	658	BMPR1B	0
A_66_P121285	2.20956	1.38326e-06	Tgif2	TGFB-induced factor homeobox 2	Mus musculus TGFB-induced factor homeobox 2 (Tgif2), transcript variant 1, mRNA [NM_173396]	NM_173396	NM_173396	228839	chr2	156679946	156680005	+	61133	6	80	A_66_P121285	FALSE	Mm.315625	ENSMUST00000081335		ref|NM_173396|ref|NM_001291124|ens|ENSMUST00000081335|ref|XM_006499352	chr2:156679946-156680005	mm|2qH1	GO:0000122(negative regulation of transcription from RNA polymerase II promoter)|GO:0003677(DNA binding)|GO:0005634(nucleus)|GO:0005654(nucleoplasm)|GO:0005813(centrosome)|GO:0006351(transcription, DNA-dependent)|GO:0006355(regulation of transcription, DNA-dependent)|GO:0010470(regulation of gastrulation)|GO:0038092(nodal signaling pathway)|GO:0045666(positive regulation of neuron differentiation…	CTTCCCACAGGATGGTTGTATAGGGACCAGCAGATTCTCTGCAGTGGTGCTGAGTTCAGA	60436	TGIF2	0
A_55_P2147026	2.20799	0.00685126	Tmc1	transmembrane channel-like gene family 1	Mus musculus transmembrane channel-like gene family 1 (Tmc1), mRNA [NM_028953]	NM_028953	NM_028953	13409	chr19	20858007	20857948	-	22470	124	325	A_55_P2147026	FALSE	Mm.219585	ENSMUST00000039500		ref|NM_028953|ens|ENSMUST00000039500|gb|AK077146|tc|TC1590074	chr19:020858007-020857948	mm|19qB	GO:0005245(voltage-gated calcium channel activity)|GO:0006810(transport)|GO:0006811(ion transport)|GO:0007605(sensory perception of sound)|GO:0009897(external side of plasma membrane)|GO:0016020(membrane)|GO:0016021(integral to membrane)|GO:0032426(stereocilium bundle tip)|GO:0034765(regulation of ion transmembrane transport)|GO:0050910(detection of mechanical stimulus involved in sensory percept…	GCTGTCAGACTTTTGTTATCACTAGACTATAATGCAGCAAATAAAGATCGTGTTGATTTC	117531	TMC1	0
A_52_P168559	2.20294	0.00093418	Cntnap2	contactin associated protein-like 2	Mus musculus contactin associated protein-like 2 (Cntnap2), transcript variant 1, mRNA [NM_001004357]	NM_001004357	NM_001004357	66797	chr6	47251040	47251099	+	53590	29	78	A_52_P168559	FALSE	Mm.440084	ENSMUST00000114641		ref|NM_001004357|ref|NM_025771|ens|ENSMUST00000114641|gb|AK129232	chr6:047251040-047251099	mm|6qB2.3	GO:0002020(protease binding)|GO:0005515(protein binding)|GO:0005769(early endosome)|GO:0005794(Golgi apparatus)|GO:0007155(cell adhesion)|GO:0007612(learning)|GO:0008038(neuron recognition)|GO:0008076(voltage-gated potassium channel complex)|GO:0009986(cell surface)|GO:0016020(membrane)|GO:0016021(integral to membrane)|GO:0019899(enzyme binding)|GO:0030534(adult behavior)|GO:0030673(axolemma)|GO:…	CATTAATTGCTAAATGAGTCCTAAAGTTTTAACCTCTTCTTGGAATGACGCCGCCCTTAA	26047	CNTNAP2	0
A_55_P2058330	2.20231	0.000156112	Insm2	insulinoma-associated 2	Mus musculus insulinoma-associated 2 (Insm2), mRNA [NM_020287]	NM_020287	NM_020287	56856	chr12	56702946	56703005	+	17208	140	26	A_55_P2058330	FALSE	Mm.114886	ENSMUST00000051857		ref|NM_020287|ens|ENSMUST00000051857	chr12:056702946-056703005	mm|12qC1	GO:0003676(nucleic acid binding)|GO:0003677(DNA binding)|GO:0003714(transcription corepressor activity)|GO:0005634(nucleus)|GO:0005737(cytoplasm)|GO:0006351(transcription, DNA-dependent)|GO:0006355(regulation of transcription, DNA-dependent)|GO:0045892(negative regulation of transcription, DNA-dependent)|GO:0046872(metal ion binding)	GGGACACTGGCAGAGTGCTCTTTGACAAATGGATTTGTAAGAATGGTTCTGCCAAATAAA	84684	INSM2	0
A_55_P2117124	2.18729	0.0611986	Zbtb49	zinc finger and BTB domain containing 49	Mus musculus zinc finger and BTB domain containing 49 (Zbtb49), mRNA [NM_029162]	NM_029162	NM_029162	75079	chr5	38591342	38591283	-	9271	164	156	A_55_P2117124	FALSE	Mm.258741			ref|NM_029162|tc|TC1630026|tc|TC1735596	chr5:038591342-038591283	mm|5qB3	GO:0000977(RNA polymerase II regulatory region sequence-specific DNA binding)|GO:0000981(sequence-specific DNA binding RNA polymerase II transcription factor activity)|GO:0001223(transcription coactivator binding)|GO:0003676(nucleic acid binding)|GO:0003677(DNA binding)|GO:0005634(nucleus)|GO:0005737(cytoplasm)|GO:0006351(transcription, DNA-dependent)|GO:0006355(regulation of transcription, DNA-d…	GTGCTGGGATTAAAAGCATGTGCCACCATGCTCAGTTTCTAAGCATTATTAATCTTAAGA	166793	ZBTB49	0
A_55_P2046563	2.18206	0.0965905	Cym	chymosin	Mus musculus chymosin (Cym), mRNA [NM_001111143]	NM_001111143	NM_001111143	229697	chr3	107014360	107014301	-	845	190	279	A_55_P2046563	FALSE	Mm.297051	ENSMUST00000029504		ref|NM_001111143|ens|ENSMUST00000029504|gb|BC171994|gb|BC147477	chr3:107014360-107014301	mm|3qF2.3	GO:0003674(molecular_function)|GO:0004190(aspartic-type endopeptidase activity)|GO:0005575(cellular_component)|GO:0006508(proteolysis)|GO:0008150(biological_process)|GO:0030163(protein catabolic process)	TTGGGGATGTTTTCATTCGGGAGTTCTACAGTGTGTTTGACAGAGCCAACAATCGTGTTG			0
A_55_P1983046	2.17957	0.00014786	Plch1	phospholipase C, eta 1	Mus musculus phospholipase C, eta 1 (Plch1), transcript variant 3, mRNA [NM_001177732]	NM_001177732	NM_001177732	269437	chr3	63500245	63500186	-	26840	111	113	A_55_P1983046	FALSE	Mm.316391	ENSMUST00000159676		ref|NM_001177732|ref|NM_001177733|ref|NM_183191|ens|ENSMUST00000159676	chr3:063500245-063500186	mm|3qE1	GO:0004435(phosphatidylinositol phospholipase C activity)|GO:0004871(signal transducer activity)|GO:0005509(calcium ion binding)|GO:0005737(cytoplasm)|GO:0005829(cytosol)|GO:0006629(lipid metabolic process)|GO:0007165(signal transduction)|GO:0008081(phosphoric diester hydrolase activity)|GO:0016020(membrane)|GO:0016042(lipid catabolic process)|GO:0016787(hydrolase activity)|GO:0035556(intracellul…	CAGATGTCATTTGCTTTTTGTACCATGAATTACAATGATGTTCTTCCTGGACCTCATAAA	23007	PLCH1	0
A_51_P169087	2.17106	2.08581e-06	Gls2	glutaminase 2 (liver, mitochondrial)	Mus musculus glutaminase 2 (liver, mitochondrial) (Gls2), transcript variant 1, mRNA [NM_001033264]	NM_001033264	NM_001033264	216456	chr10	127646830	127646889	+	48693	44	32	A_51_P169087	FALSE	Mm.30102	ENSMUST00000134104		ref|NM_001033264|ref|NM_001285779|ref|NM_001285777|ens|ENSMUST00000134104	chr10:127646830-127646889	mm|10qD3	GO:0003674(molecular_function)|GO:0004359(glutaminase activity)|GO:0005739(mitochondrion)|GO:0006541(glutamine metabolic process)|GO:0016787(hydrolase activity)|GO:0042981(regulation of apoptotic process)|GO:0072593(reactive oxygen species metabolic process)	CATGCATATGTATCTGCCGCAGAGTAAGAGAAATGGGTGAGAGCCAAACCACGTGGCTTT	27165	GLS2	0
A_51_P143712	2.16016	0.00324206	Tdh	L-threonine dehydrogenase	Mus musculus L-threonine dehydrogenase (Tdh), mRNA [NM_021480]	NM_021480	NM_021480	58865	chr14	64111386	64111327	-	16863	141	60	A_51_P143712	FALSE	Mm.354229	ENSMUST00000022522		ref|NM_021480|ens|ENSMUST00000022522|gb|AF134346|gb|AK077571	chr14:064111386-064111327	mm|14qD1	GO:0003824(catalytic activity)|GO:0005739(mitochondrion)|GO:0006567(threonine catabolic process)|GO:0008743(L-threonine 3-dehydrogenase activity)|GO:0016491(oxidoreductase activity)|GO:0050662(coenzyme binding)|GO:0055114(oxidation-reduction process)	CACAAAGGCCAGAGAAATGAAGTCCTGAGTGGTGGTGGCTATCTCTCGGGATCTGCAGCA			0
A_51_P173678	2.15686	0.0011739	Slc10a6	solute carrier family 10 (sodium/bile acid cotransporter family), member 6	Mus musculus solute carrier family 10 (sodium/bile acid cotransporter family), member 6 (Slc10a6), mRNA [NM_029415]	NM_029415	NM_029415	75750	chr5	104035129	104035070	-	26482	112	173	A_51_P173678	FALSE	Mm.7446	ENSMUST00000031263		ref|NM_029415|ens|ENSMUST00000031263|ref|XM_006535278|gb|BC127608	chr5:104035129-104035070	mm|5qE5	GO:0005886(plasma membrane)|GO:0005887(integral to plasma membrane)|GO:0006810(transport)|GO:0006811(ion transport)|GO:0006814(sodium ion transport)|GO:0008508(bile acid:sodium symporter activity)|GO:0015293(symporter activity)|GO:0015721(bile acid and bile salt transport)|GO:0016020(membrane)|GO:0016021(integral to membrane)|GO:0035725(sodium ion transmembrane transport)|GO:0043250(sodium-depend…	CAGAAAAGCCTGTGGCTTGTTTCCTGTTTGTTTTCATAGCTGATCAGTGATTATCTCAGA	345274	SLC10A6	0
A_51_P110759	2.15612	2.77252e-05	Slc1a1	solute carrier family 1 (neuronal/epithelial high affinity glutamate transporter, system Xag), member 1	Mus musculus solute carrier family 1 (neuronal/epithelial high affinity glutamate transporter, system Xag), member 1 (Slc1a1), mRNA [NM_009199]	NM_009199	NM_009199	20510	chr19	28988332	28988391	+	4388	179	82	A_51_P110759	FALSE	Mm.246670	ENSMUST00000025875		ref|NM_009199|ens|ENSMUST00000025875|gb|AK083097|gb|AK018188	chr19:028988332-028988391	mm|19qC1	GO:0005313(L-glutamate transmembrane transporter activity)|GO:0005515(protein binding)|GO:0005886(plasma membrane)|GO:0006810(transport)|GO:0006835(dicarboxylic acid transport)|GO:0015293(symporter activity)|GO:0015501(glutamate:sodium symporter activity)|GO:0015813(L-glutamate transport)|GO:0016020(membrane)|GO:0016021(integral to membrane)|GO:0016324(apical plasma membrane)|GO:0016595(glutamate…	GTTCACAAGATCATTGGGGTCATCTTGTAACCAGCCACTTCACACACTGTGCTGTTAACT	6505	SLC1A1	0
A_52_P641758	2.15474	2.05964e-07	Ggct	gamma-glutamyl cyclotransferase	Mus musculus gamma-glutamyl cyclotransferase (Ggct), mRNA [NM_026637]	NM_026637	NM_026637	110175	chr6	54935855	54935796	-	38228	76	297	A_52_P641758	FALSE	Mm.294708	ENSMUST00000002874		ref|NM_026637|ens|ENSMUST00000002874|gb|AK008719|gb|BC080818	chr6:054935855-054935796	mm|6qB3	GO:0001836(release of cytochrome c from mitochondria)|GO:0003839(gamma-glutamylcyclotransferase activity)|GO:0005829(cytosol)|GO:0006750(glutathione biosynthetic process)|GO:0016740(transferase activity)|GO:0016746(transferase activity, transferring acyl groups)|GO:0042803(protein homodimerization activity)|GO:0070062(extracellular vesicular exosome)	ATAACAGACTCTGAAGCTATGTGTGCTAGTATGAAGTGCTTTTAACGTTTGCGAACAGGA			0
A_51_P309854	2.15294	0.00430711	Kcnn2	potassium intermediate/small conductance calcium-activated channel, subfamily N, member 2	Mus musculus potassium intermediate/small conductance calcium-activated channel, subfamily N, member 2 (Kcnn2), mRNA [NM_080465]	NM_080465	NM_080465	140492	chr18	45845292	45845351	+	5215	177	67	A_51_P309854	FALSE	Mm.458654	ENSMUST00000169783		ref|NM_080465|ens|ENSMUST00000169783|ens|ENSMUST00000066890|ref|XM_006525638	chr18:045845292-045845351	mm|18qC	GO:0005216(ion channel activity)|GO:0005516(calmodulin binding)|GO:0005790(smooth endoplasmic reticulum)|GO:0005886(plasma membrane)|GO:0006810(transport)|GO:0006811(ion transport)|GO:0006813(potassium ion transport)|GO:0015269(calcium-activated potassium channel activity)|GO:0016020(membrane)|GO:0016021(integral to membrane)|GO:0016286(small conductance calcium-activated potassium channel activi…	CTATGGTTCTAATCAGCGTTATCCGGGTTCTGATGTCAGAATCTTGGGAACCTGAACACT	3781	KCNN2	0
A_55_P2100485	2.15192	0.00187015	Epha8	Eph receptor A8	Mus musculus Eph receptor A8 (Epha8), mRNA [NM_007939]	NM_007939	NM_007939	13842	chr4	136485394	136485335	-	59499	11	68	A_55_P2100485	FALSE	Mm.1390	ENSMUST00000030420		ref|NM_007939|ens|ENSMUST00000030420|ref|XM_006538529|ref|XM_011250187	chr4:136485394-136485335	mm|4qD3	GO:0000166(nucleotide binding)|GO:0004672(protein kinase activity)|GO:0004713(protein tyrosine kinase activity)|GO:0004714(transmembrane receptor protein tyrosine kinase activity)|GO:0005003(ephrin receptor activity)|GO:0005004(GPI-linked ephrin receptor activity)|GO:0005515(protein binding)|GO:0005524(ATP binding)|GO:0005768(endosome)|GO:0005886(plasma membrane)|GO:0005887(integral to plasma mem…	TGTGGTTCCCATCCTGAGTCTGGAATCACTTGTGATGAGAATAAATACTGTCTCATCTTC	2046	EPHA8	0
A_55_P2178044	2.14886	0.00115345	Inppl1	inositol polyphosphate phosphatase-like 1	Mus musculus inositol polyphosphate phosphatase-like 1 (Inppl1), transcript variant 1, mRNA [NM_010567]	NM_010567	NM_010567	16332	chr7	108971253	108971194	-	8625	166	136	A_55_P2178044	FALSE	Mm.476000	ENSMUST00000186316		ref|NM_010567|ref|NM_001122739|ens|ENSMUST00000186316|ens|ENSMUST00000165052	chr7:108971253-108971194	mm|7qE3	GO:0001958(endochondral ossification)|GO:0002376(immune system process)|GO:0003779(actin binding)|GO:0004445(inositol-polyphosphate 5-phosphatase activity)|GO:0005515(protein binding)|GO:0005547(phosphatidylinositol-3,4,5-trisphosphate binding)|GO:0005737(cytoplasm)|GO:0005794(Golgi apparatus)|GO:0005856(cytoskeleton)|GO:0005886(plasma membrane)|GO:0006006(glucose metabolic process)|GO:0006661(ph…	GGTGGTCGGCTTGTTGTCTTCAATAAATTAAGTTTTATTTGGATTGAGCAAAATCACCTT	3636	INPPL1	0
A_55_P1987291	2.14596	6.59209e-06	Lppr5	lipid phosphate phosphatase-related protein type 5	Mus musculus lipid phosphate phosphatase-related protein type 5 (Lppr5), transcript variant 1, mRNA [NM_001305451]	NM_001305451	NM_001305451	75769	chr3	117392323	117392382	+	43365	60	192	A_55_P1987291	FALSE	Mm.72187	ENSMUST00000039564		ref|NM_001305451|ref|NM_029425|ens|ENSMUST00000039564|gb|AK043629	chr3:117392323-117392382	mm|3qG1	GO:0003824(catalytic activity)|GO:0005575(cellular_component)|GO:0008138(protein tyrosine/serine/threonine phosphatase activity)|GO:0008150(biological_process)|GO:0008330(protein tyrosine/threonine phosphatase activity)|GO:0008579(JUN kinase phosphatase activity)|GO:0008969(phosphohistidine phosphatase activity)|GO:0016020(membrane)|GO:0016021(integral to membrane)|GO:0016312(inositol bisphosphat…	GTGAAAGAACAGTGGGGGAGGAAAGAATTCTCTGCTGTGTATTGTATTTTTCAAATAAAA	163404	PLPPR5	0
A_52_P26299	2.14427	5.33953e-05	Slc35f1	solute carrier family 35, member F1	Mus musculus solute carrier family 35, member F1 (Slc35f1), mRNA [NM_178675]	NM_178675	NM_178675	215085	chr10	52830984	52831043	+	27897	107	296	A_52_P26299	FALSE	Mm.338690	ENSMUST00000105473		ref|NM_178675|ens|ENSMUST00000105473|gb|AK165021|gb|BC059075	chr10:052830984-052831043	mm|10qB3	GO:0003674(molecular_function)|GO:0005575(cellular_component)|GO:0006810(transport)|GO:0008150(biological_process)|GO:0016020(membrane)|GO:0016021(integral to membrane)	TTAGGTATTGCTAACTTGTGGTATTAACCTTCTGACAAGCTTGTAGTATTGTTTGATTGG	222553	SLC35F1	0
A_55_P2009375	2.1435	0.000635018	Cdk18	cyclin-dependent kinase 18	Mus musculus cyclin-dependent kinase 18 (Cdk18), mRNA [NM_008795]	NM_008795	NM_008795	18557	chr1	134010297	134010238	-	40523	69	299	A_55_P2009375	FALSE	Mm.28130			ref|NM_008795|ref|XM_011247940|ref|XR_387152|gb|AK171569	chr1:134010297-134010238	mm|1qE4	GO:0000166(nucleotide binding)|GO:0004672(protein kinase activity)|GO:0004674(protein serine/threonine kinase activity)|GO:0004693(cyclin-dependent protein kinase activity)|GO:0005524(ATP binding)|GO:0006468(protein phosphorylation)|GO:0016301(kinase activity)|GO:0016310(phosphorylation)|GO:0016740(transferase activity)|GO:0016772(transferase activity, transferring phosphorus-containing groups)	CACTGACTGTGAATGTCGTGACTCAGAGCAAAGACAGAGAATATATTTAATTCATGTTGT	5129	CDK18	0
A_55_P1984441	2.1409	0.0183023	Usp44	ubiquitin specific peptidase 44	Mus musculus ubiquitin specific peptidase 44 (Usp44), transcript variant 2, mRNA [NM_183199]	NM_183199	NM_183199	327799	chr10	93310949	93311008	+	16568	142	321	A_55_P1984441	FALSE	Mm.491598	ENSMUST00000095333		ref|NM_183199|ens|ENSMUST00000095333|ref|XM_011243492|gb|BC111886	chr10:093310949-093311008	mm|10qC2	GO:0004843(ubiquitin-specific protease activity)|GO:0005634(nucleus)|GO:0005730(nucleolus)|GO:0006508(proteolysis)|GO:0006511(ubiquitin-dependent protein catabolic process)|GO:0007049(cell cycle)|GO:0007067(mitosis)|GO:0008233(peptidase activity)|GO:0008234(cysteine-type peptidase activity)|GO:0008270(zinc ion binding)|GO:0015630(microtubule cytoskeleton)|GO:0016579(protein deubiquitination)|GO:0…	GCGGCAGAAGGGCTTACTTCATACAGTTAATTTTGCTACTATTTATGAGTTTTAGTGTAA	84101	USP44	0
A_55_P1970905	2.13929	0.000269094	Lin28b	lin-28 homolog B (C. elegans)	Mus musculus lin-28 homolog B (C. elegans) (Lin28b), mRNA [NM_001031772]	NM_001031772	NM_001031772	380669	chr10	45096527	45096468	-	9644	163	66	A_55_P1970905	FALSE	Mm.440328	ENSMUST00000079390		ref|NM_001031772|ens|ENSMUST00000079390|ref|XM_011243186|ref|XM_011243181	chr10:045096527-045096468	mm|10qB2	GO:0003676(nucleic acid binding)|GO:0003677(DNA binding)|GO:0003723(RNA binding)|GO:0005634(nucleus)|GO:0005654(nucleoplasm)|GO:0005730(nucleolus)|GO:0005737(cytoplasm)|GO:0005739(mitochondrion)|GO:0006355(regulation of transcription, DNA-dependent)|GO:0008270(zinc ion binding)|GO:0010587(miRNA catabolic process)|GO:0016235(aggresome)|GO:0031047(gene silencing by RNA)|GO:0031054(pre-miRNA process…	GGACTGTCTTTGTACCGAATGTCTTACTCTGTTGGCTATTGATGTTTAAAATTTCATGAT	389421	LIN28B	0
A_55_P2058335	2.1385	0.000537886	Insm2	insulinoma-associated 2	Mus musculus insulinoma-associated 2 (Insm2), mRNA [NM_020287]	NM_020287	NM_020287	56856	chr12	56701785	56701844	+	10533	160	256	A_55_P2058335	FALSE	Mm.114886	ENSMUST00000051857		ref|NM_020287|ens|ENSMUST00000051857|gb|BC169243|tc|TC1628453	chr12:056701785-056701844	mm|12qC1	GO:0003676(nucleic acid binding)|GO:0003677(DNA binding)|GO:0003714(transcription corepressor activity)|GO:0005634(nucleus)|GO:0005737(cytoplasm)|GO:0006351(transcription, DNA-dependent)|GO:0006355(regulation of transcription, DNA-dependent)|GO:0045892(negative regulation of transcription, DNA-dependent)|GO:0046872(metal ion binding)	GGCATCCGATGGTAGCGCTCAGCAGATTTTCTCCTGCAAGTACTGCCCGTCCACTTTTTT	84684	INSM2	0
A_55_P2006118	2.13535	0.000275738	Rbp4	retinol binding protein 4, plasma	Mus musculus retinol binding protein 4, plasma (Rbp4), transcript variant 1, mRNA [NM_001159487]	NM_001159487	NM_001159487	19662	chr19	38191179	38191120	-	20549	130	231	A_55_P2006118	FALSE	Mm.2605	ENSMUST00000025951		ref|NM_001159487|ref|NM_011255|ens|ENSMUST00000025951|ens|ENSMUST00000112335	chr19:038191179-038191120	mm|19qC3	GO:0001654(eye development)|GO:0005215(transporter activity)|GO:0005501(retinoid binding)|GO:0005515(protein binding)|GO:0005576(extracellular region)|GO:0005615(extracellular space)|GO:0006094(gluconeogenesis)|GO:0006810(transport)|GO:0007283(spermatogenesis)|GO:0007507(heart development)|GO:0008584(male gonad development)|GO:0009790(embryo development)|GO:0016918(retinal binding)|GO:0019841(ret…	TCCCTGAAAGATGTTTGAGGCTTGGGATTCCAAACTTGGTTTATTAAACATATAGTCACC	5950	RBP4	0
A_55_P2244360	2.13494	0.00572161	D730045A05Rik	RIKEN cDNA D730045A05 gene	Mus musculus RIKEN cDNA D730045A05 gene (D730045A05Rik), long non-coding RNA [NR_045390]	NR_045390	NR_045390	77855	chr18	74179679	74179738	+	39582	72	213	A_55_P2244360	FALSE	Mm.410760			ref|NR_045390|gb|AK021341|tc|TC1618041|riken|D730045A05	chr18:74179679-74179738	mm|18qE2		GATCCTGAGGGCCAATGGTTATTATTTTCAAATACCAAATAAATCTTGTTTCAAAGAGGG			0
A_51_P313651	2.13231	0.000135371	Rbfox3	RNA binding protein, fox-1 homolog (C. elegans) 3	Mus musculus RNA binding protein, fox-1 homolog (C. elegans) 3 (Rbfox3), transcript variant 3, mRNA [NM_001024931]	NM_001024931	NM_001024931	52897	chr11	118351107	118351074	-	38620	75	169	A_51_P313651	FALSE	Mm.341103	ENSMUST00000103023		ref|NM_001024931|ref|NM_001285438|ens|ENSMUST00000103023|ref|XM_006533727	chr11:118364232-118364174	mm|11qE2	GO:0000166(nucleotide binding)|GO:0000381(regulation of alternative nuclear mRNA splicing, via spliceosome)|GO:0003676(nucleic acid binding)|GO:0003677(DNA binding)|GO:0003723(RNA binding)|GO:0005515(protein binding)|GO:0005622(intracellular)|GO:0005634(nucleus)|GO:0005737(cytoplasm)|GO:0006397(mRNA processing)|GO:0008380(RNA splicing)|GO:0043025(neuronal cell body)|GO:0043204(perikaryon)|GO:0043…	CTTTTGAAACTAGCTCAGATGCTGAGCCGAGCCCGGGAGAAGCTGAATGGGACGATCGTA	146713	RBFOX3	0
A_55_P2105436	2.13125	0.000767021	Foxp1	forkhead box P1	Mus musculus mammary gland RCB-0526 Jyg-MC(A) cDNA, RIKEN full-length enriched library, clone:G830003K13 product:forkhead box P1, full insert sequence. [AK144920]		AK144920	108655	chr6	98956738	98956679	-	33036	92	185	A_55_P2105436	FALSE	Mm.234965			gb|AK144920|riken|G830003K13	chr6:98956738-98956679	mm|6qD3	GO:0000122(negative regulation of transcription from RNA polymerase II promoter)|GO:0000978(RNA polymerase II core promoter proximal region sequence-specific DNA binding)|GO:0001701(in utero embryonic development)|GO:0002053(positive regulation of mesenchymal cell proliferation)|GO:0002329(pre-B cell differentiation)|GO:0002639(positive regulation of immunoglobulin production)|GO:0003677(DNA bind…	TGTGCCTGCATTTTCTTTTATAATGAAGGGGCAGGTTATCCTGGGAGGGAAGAAAAGAAG	27086	FOXP1	0
A_55_P2053372	2.12685	0.000188685	Rbfox3	RNA binding protein, fox-1 homolog (C. elegans) 3	Mus musculus RNA binding protein, fox-1 homolog (C. elegans) 3 (Rbfox3), transcript variant 4, mRNA [NM_001285436]	NM_001285436	NM_001285436	52897	chr11	118357725	118357666	-	697	190	248	A_55_P2053372	FALSE	Mm.341103	ENSMUST00000017576		ref|NM_001285436|ref|NM_001285437|ens|ENSMUST00000017576|ref|XM_006533725	chr11:118357725-118357666	mm|11qE2	GO:0000166(nucleotide binding)|GO:0000381(regulation of alternative nuclear mRNA splicing, via spliceosome)|GO:0003676(nucleic acid binding)|GO:0003677(DNA binding)|GO:0003723(RNA binding)|GO:0005515(protein binding)|GO:0005622(intracellular)|GO:0005634(nucleus)|GO:0005737(cytoplasm)|GO:0006397(mRNA processing)|GO:0008380(RNA splicing)|GO:0043025(neuronal cell body)|GO:0043204(perikaryon)|GO:0043…	CTCTTGTCCGTTTGCTTCCAGGGTCGTGTATCAGGATGGATTTTATGGTGCTGAGATTTA	146713	RBFOX3	0
A_51_P204080	2.1248	0.0426993	Hk2	hexokinase 2	Mus musculus hexokinase 2 (Hk2), mRNA [NM_013820]	NM_013820	NM_013820	15277	chr6	82675115	82675056	-	53232	30	138	A_51_P204080	FALSE	Mm.255848	ENSMUST00000168725		ref|NM_013820|ens|ENSMUST00000168725|ens|ENSMUST00000000642|gb|AK036845	chr6:082675115-082675056	mm|6qC3	GO:0000166(nucleotide binding)|GO:0001678(cellular glucose homeostasis)|GO:0002931(response to ischemia)|GO:0003824(catalytic activity)|GO:0004340(glucokinase activity)|GO:0004396(hexokinase activity)|GO:0005524(ATP binding)|GO:0005536(glucose binding)|GO:0005739(mitochondrion)|GO:0005741(mitochondrial outer membrane)|GO:0005829(cytosol)|GO:0005975(carbohydrate metabolic process)|GO:0006006(gluco…	TAGTGAGCGTTTTGTCATCATGTACAGTAGAGAACTAGTTGAATTAACCATGTGATGTTA	3099	HK2	0
A_52_P204809	2.12404	0.000164572	Pcdhb13	protocadherin beta 13	Mus musculus protocadherin beta 13 (Pcdhb13), mRNA [NM_053138]	NM_053138	NM_053138	93884	chr18	37605358	37605417	+	30976	98	42	A_52_P204809	FALSE	Mm.196700	ENSMUST00000056915		ref|NM_053138|ens|ENSMUST00000056915|gb|AK082435|tc|TC1597782	chr18:037605358-037605417	mm|18qB3		TGGAGATTCCACTAGTTTCTCTACTATGCTTCATAGTTTGTTTTTTAATTAGTGGAACTA	56130	PCDHB6	0
A_55_P2347976	2.1219	0.000603714	Mir17hg	Mir17 host gene (non-protein coding)	Mus musculus Mir17 host gene (non-protein coding) (Mir17hg), long non-coding RNA [NR_029382]	NR_029382	NR_029382	75957	chr14	115445828	115445887	+	47969	46	168	A_55_P2347976	FALSE	Mm.34859			ref|NR_029382|gb|AK053349|gb|AK017164|tc|TC1632821	chr14:115445828-115445887	mm|14qE4	GO:0003674(molecular_function)|GO:0005575(cellular_component)|GO:0008150(biological_process)	GAGGTACCTGGTTTATTGTGGTTACAGACTTGGAATAATGTTCATTGTTTTGTGCTAATA			0
A_55_P2078960	2.117	0.0150899	Tdh	L-threonine dehydrogenase	Mus musculus L-threonine dehydrogenase (Tdh), mRNA [NM_021480]	NM_021480	NM_021480	58865	chr14	64111425	64111366	-	35789	83	256	A_55_P2078960	FALSE	Mm.354229	ENSMUST00000022522		ref|NM_021480|ens|ENSMUST00000022522|gb|AF134346|gb|AK077571	chr14:064111425-064111366	mm|14qD1	GO:0003824(catalytic activity)|GO:0005739(mitochondrion)|GO:0006567(threonine catabolic process)|GO:0008743(L-threonine 3-dehydrogenase activity)|GO:0016491(oxidoreductase activity)|GO:0050662(coenzyme binding)|GO:0055114(oxidation-reduction process)	TTACACACTGCCTTTGTCCTGTGCCTAAATTGGTCCAAGCACAAAGGCCAGAGAAATGAA			0
A_51_P338998	2.11154	0.0866067	Prim2	DNA primase, p58 subunit	Mus musculus DNA primase, p58 subunit (Prim2), mRNA [NM_008922]	NM_008922	NM_008922	19076	chr1	33510792	33510733	-	24989	116	208	A_51_P338998	FALSE	Mm.27705	ENSMUST00000027312		ref|NM_008922|ens|ENSMUST00000027312|ref|XM_011238455|gb|AK076095	chr1:033510792-033510733	mm|1qB	GO:0003677(DNA binding)|GO:0003720(telomerase activity)|GO:0003724(RNA helicase activity)|GO:0003896(DNA primase activity)|GO:0003899(DNA-directed RNA polymerase activity)|GO:0004779(sulfate adenylyltransferase activity)|GO:0006260(DNA replication)|GO:0006269(DNA replication, synthesis of RNA primer)|GO:0006351(transcription, DNA-dependent)|GO:0008192(RNA guanylyltransferase activity)|GO:0008193(…	GGAAAGGAAGCATTCCTATTGAAACTGTTAAAATCCTCAAGCAGCAAGACAATTAAAACT	5558	PRIM2	0
A_55_P1988678	2.11081	7.26169e-05	Znhit6	zinc finger, HIT type 6	Mus musculus zinc finger, HIT type 6 (Znhit6), mRNA [NM_001081094]	NM_001081094	NM_001081094	229937	chr3	145267016	145267075	+	12784	154	17	A_55_P1988678	FALSE	Mm.24586	ENSMUST00000098534		ref|NM_001081094|ens|ENSMUST00000098534|ref|XM_006501437|ref|XM_006501438	chr3:145267016-145267075	mm|3qH2	GO:0000492(box C/D snoRNP assembly)|GO:0019899(enzyme binding)|GO:0042254(ribosome biogenesis)|GO:0042802(identical protein binding)|GO:0046872(metal ion binding)|GO:0070062(extracellular vesicular exosome)|GO:0070761(pre-snoRNP complex)	GTCAGTGGGTAGTGTGTTGTTTATCCAAAAAGTAATTAAACAGCATAAGGTTTCTCACGG	54680	ZNHIT6	0
A_65_P18935	2.10675	2.46416e-06	Grin1	glutamate receptor, ionotropic, NMDA1 (zeta 1)	Mus musculus glutamate receptor, ionotropic, NMDA1 (zeta 1) (Grin1), transcript variant 1, mRNA [NM_008169]	NM_008169	NM_008169	14810	chr2	25146986	25146927	-	36627	81	219	A_65_P18935	FALSE	Mm.278672	ENSMUST00000127171		ref|NM_008169|ref|NM_001177656|ref|NM_001177657|ens|ENSMUST00000127171	chr2:025146986-025146927	mm|2qA3	GO:0001661(conditioned taste aversion)|GO:0001964(startle response)|GO:0001967(suckling behavior)|GO:0001975(response to amphetamine)|GO:0004872(receptor activity)|GO:0004970(ionotropic glutamate receptor activity)|GO:0004972(N-methyl-D-aspartate selective glutamate receptor activity)|GO:0005102(receptor binding)|GO:0005216(ion channel activity)|GO:0005234(extracellular-glutamate-gated ion channe…	AAGAGGGCTGAGCCTTCTCTTCTGTCTGCAGCCACAATAGGCTTCCTCAGACGCTGGCTT	2902	GRIN1	0
A_52_P113043	2.10499	0.0751227	Kctd4	potassium channel tetramerisation domain containing 4	Mus musculus potassium channel tetramerisation domain containing 4 (Kctd4), mRNA [NM_026214]	NM_026214	NM_026214	67516	chr14	76364324	76364383	+	37998	77	101	A_52_P113043	FALSE	Mm.390712	ENSMUST00000050120		ref|NM_026214|ens|ENSMUST00000050120|gb|AK032624|gb|AK032314	chr14:076364324-076364383	mm|14qD3	GO:0003674(molecular_function)|GO:0005575(cellular_component)|GO:0008150(biological_process)|GO:0051260(protein homooligomerization)	TTATTTTATGAATGGCTGTTTAAGGACTATTCTCCTAGCTAAACTCTAAATGTGAGTGCC	386618	KCTD4	0
A_55_P2272538	2.10354	0.019814	AA914427	EST AA914427	Mus musculus 3 days neonate thymus cDNA, RIKEN full-length enriched library, clone:A630095I08 product:unclassifiable, full insert sequence. [AK042479]		AK042479	53959	chr16	17923190	17923249	+	45602	53	310	A_55_P2272538	FALSE	Mm.300210			gb|AK042479|riken|A630095I08|nap|NAP082026-1	chr16:17923190-17923249	mm|16qA3		CAGATATGCAAGCTTGGACTCTGAATTTCTTGATTCTCTACTTAAAGTTTGGGGTTTTTT			0
A_55_P1993777	2.09078	0.000361064	Rbfox3	RNA binding protein, fox-1 homolog (C. elegans) 3	Mus musculus RNA binding protein, fox-1 homolog (C. elegans) 3 (Rbfox3), transcript variant 1, mRNA [NM_001039167]	NM_001039167	NM_001039167	52897	chr11	118351166	118351107	-	22715	123	164	A_55_P1993777	FALSE	Mm.341103			ref|NM_001039167|ref|NM_001039168|ref|NM_001285436|ref|NM_001024931	chr11:118351166-118351107	mm|11qE2	GO:0000166(nucleotide binding)|GO:0000381(regulation of alternative nuclear mRNA splicing, via spliceosome)|GO:0003676(nucleic acid binding)|GO:0003677(DNA binding)|GO:0003723(RNA binding)|GO:0005515(protein binding)|GO:0005622(intracellular)|GO:0005634(nucleus)|GO:0005737(cytoplasm)|GO:0006397(mRNA processing)|GO:0008380(RNA splicing)|GO:0043025(neuronal cell body)|GO:0043204(perikaryon)|GO:0043…	CCTTTCTTACCATTCTGTATGCTTCCACGGTGTGACCATTCAAATTAACAGTATTATTAT	146713	RBFOX3	0
A_52_P361435	2.09008	0.00354261	Zfp804a	zinc finger protein 804A	Mus musculus zinc finger protein 804A (Zfp804a), mRNA [NM_175513]	NM_175513	NM_175513	241514	chr2	82099768	82099827	+	42901	62	135	A_52_P361435	FALSE	Mm.119383	ENSMUST00000047527		ref|NM_175513|ens|ENSMUST00000047527|ref|XM_011239522|gb|BC035535	chr2:082099768-082099827	mm|2qD	GO:0008150(biological_process)|GO:0046872(metal ion binding)	GAATAGTTTGAGAATCAATATAATATATGCTGTATATTAAAATGATGTCTTAAGAGTATG	91752	ZNF804A	0
A_55_P2023188	2.08917	0.00690232	Lsm2	LSM2 homolog, U6 small nuclear RNA associated (S. cerevisiae)	Mus musculus LSM2 homolog, U6 small nuclear RNA associated (S. cerevisiae) (Lsm2), transcript variant 1, mRNA [NM_030597]	NM_030597	NM_030597	27756	chr17	35119190	35119249	+	45017	55	168	A_55_P2023188	FALSE	Mm.165735	ENSMUST00000174434		ref|NM_030597|ref|NM_001204273|ens|ENSMUST00000174434|ens|ENSMUST00000174860	chr17:035119190-035119249	mm|17qB1	GO:0000244(assembly of spliceosomal tri-snRNP)|GO:0003723(RNA binding)|GO:0005515(protein binding)|GO:0005634(nucleus)|GO:0005654(nucleoplasm)|GO:0005681(spliceosomal complex)|GO:0005737(cytoplasm)|GO:0006397(mRNA processing)|GO:0006402(mRNA catabolic process)|GO:0008380(RNA splicing)|GO:0017160(Ral GTPase binding)|GO:0019901(protein kinase binding)|GO:0030529(ribonucleoprotein complex)|GO:004654…	TGCTCGGAGCCGATGGTGTTTTGGGGGAAACCTTTAGCAAGTCCAAGAGAAAGCCCACGG	57819	LSM2	0
A_52_P439263	2.08909	0.000152558	Ugt8a	UDP galactosyltransferase 8A	Mus musculus UDP galactosyltransferase 8A (Ugt8a), mRNA [NM_011674]	NM_011674	NM_011674	22239	chr3	125569054	125568995	-	23107	122	36	A_52_P439263	FALSE	Mm.306021	ENSMUST00000057944		ref|NM_011674|ens|ENSMUST00000057944|ref|XM_006501310|ref|XM_006501309	chr3:125569054-125568995	mm|3qG1	GO:0002175(protein localization to paranode region of axon)|GO:0003851(2-hydroxyacylsphingosine 1-beta-galactosyltransferase activity)|GO:0006629(lipid metabolic process)|GO:0006665(sphingolipid metabolic process)|GO:0007010(cytoskeleton organization)|GO:0008120(ceramide glucosyltransferase activity)|GO:0008152(metabolic process)|GO:0008489(UDP-galactose:glucosylceramide beta-1,4-galactosyltransf…	ATGGAGACAAGTCACAACTTTCATAAATTCAGGACCTCCATGTTGAACCACTTACTAAAT	7368	UGT8	0
A_51_P252859	2.08341	0.00433108	Cyr61	cysteine rich protein 61	Mus musculus cysteine rich protein 61 (Cyr61), mRNA [NM_010516]	NM_010516	NM_010516	16007	chr3	145310246	145310187	-	32953	92	24	A_51_P252859	FALSE	Mm.1231	ENSMUST00000029846		ref|NM_010516|ens|ENSMUST00000029846|gb|AK156723|gb|AK159452	chr3:145310246-145310187	mm|3qH2	GO:0001558(regulation of cell growth)|GO:0001649(osteoblast differentiation)|GO:0001934(positive regulation of protein phosphorylation)|GO:0002041(intussusceptive angiogenesis)|GO:0003181(atrioventricular valve morphogenesis)|GO:0003278(apoptotic process involved in heart morphogenesis)|GO:0003281(ventricular septum development)|GO:0005178(integrin binding)|GO:0005520(insulin-like growth factor b…	AAGATTAGTTGGGCCAAGTGAAAGCCCTGCTTGTCCTTTGACAGAAGTAAATGAAAGCGC	3491	CYR61	0
A_55_P1956083	2.08245	0.00995062	Gpr68	G protein-coupled receptor 68	Mus musculus G protein-coupled receptor 68 (Gpr68), transcript variant 1, mRNA [NM_175493]	NM_175493	NM_175493	238377	chr12	102114954	102114895	-	30632	99	74	A_55_P1956083	FALSE	Mm.32160	ENSMUST00000110066		ref|NM_175493|ref|NM_001177674|ref|NM_001177673|ens|ENSMUST00000110066	chr12:102114954-102114895	mm|12qE	GO:0004871(signal transducer activity)|GO:0004930(G-protein coupled receptor activity)|GO:0005886(plasma membrane)|GO:0007165(signal transduction)|GO:0007186(G-protein coupled receptor signaling pathway)|GO:0016020(membrane)|GO:0016021(integral to membrane)|GO:0032024(positive regulation of insulin secretion)|GO:0035774(positive regulation of insulin secretion involved in cellular response to glu…	GGACTGTGAGGTGGGTTTATGTAGTGACTTCAGTCAGCAAATAAAACAAAGTAGCCAATC	8111	GPR68	0
A_51_P391777	2.08037	0.0264385	Lin7a	lin-7 homolog A (C. elegans)	Mus musculus lin-7 homolog A (C. elegans) (Lin7a), transcript variant 3, mRNA [NM_001284329]	NM_001284329	NM_001284329	108030	chr10	106710254	106710313	+	40808	68	58	A_51_P391777	FALSE	Mm.268025			ref|NM_001284329|gb|AK077191|tc|TC1619226|riken|4933425M06	chr10:106710254-106710313	mm|10qD1	GO:0005515(protein binding)|GO:0005623(cell)|GO:0005886(plasma membrane)|GO:0005911(cell-cell junction)|GO:0005923(tight junction)|GO:0006810(transport)|GO:0006887(exocytosis)|GO:0007269(neurotransmitter secretion)|GO:0008105(asymmetric protein localization)|GO:0015031(protein transport)|GO:0016020(membrane)|GO:0016323(basolateral plasma membrane)|GO:0030054(cell junction)|GO:0043005(neuron proje…	TGACTTTAACTCAATCTGTTGGTGCCAGAACGGATATTATGCGGTGCCCATAGCAACCTT	8825	LIN7A	0
A_66_P107129	2.07927	0.0255965	3300005D01Rik	RIKEN cDNA 3300005D01 gene	Mus musculus RIKEN cDNA 3300005D01 gene (3300005D01Rik), transcript variant 2, long non-coding RNA [NR_045080]	NR_045080	NR_045080	78512	chr17	5803166	5803225	+	41085	67	160	A_66_P107129	FALSE	Mm.23696			ref|NR_045080|ref|NR_045081|ref|NR_045079|gb|AK077272	chr17:5803166-5803225	mm|17qA1		ATAATCAGGAAGGGGTTTGAGATAGCTGCCTTGTGTTTCCAGGCCAGTCCATCTCAAAAT			0
A_55_P2290388	2.07486	3.72787e-05	Rorb	RAR-related orphan receptor beta	Mus musculus RAR-related orphan receptor beta (Rorb), transcript variant 1, mRNA [NM_001043354]	NM_001043354	NM_001043354	225998	chr19	19012208	19012149	-	32362	94	221	A_55_P2290388	FALSE	Mm.234641	ENSMUST00000112832		ref|NM_001043354|ref|NM_001289921|ref|NM_146095|ens|ENSMUST00000112832	chr19:019012208-019012149	mm|19qB	GO:0003677(DNA binding)|GO:0003700(sequence-specific DNA binding transcription factor activity)|GO:0003707(steroid hormone receptor activity)|GO:0004879(ligand-activated sequence-specific DNA binding RNA polymerase II transcription factor activity)|GO:0005515(protein binding)|GO:0005634(nucleus)|GO:0006351(transcription, DNA-dependent)|GO:0006355(regulation of transcription, DNA-dependent)|GO:000…	CCTGAGTGGGGCTCTTTTGTTTGTTCGTTTGTTGTTTGTTTGTTTTTGAAATGATCATAA	6096	RORB	0
A_55_P2015074	2.07097	0.000882519	Slc10a6	solute carrier family 10 (sodium/bile acid cotransporter family), member 6	Mus musculus solute carrier family 10 (sodium/bile acid cotransporter family), member 6 (Slc10a6), mRNA [NM_029415]	NM_029415	NM_029415	75750	chr5	104035678	104035619	-	53950	28	14	A_55_P2015074	FALSE	Mm.7446	ENSMUST00000031263		ref|NM_029415|ens|ENSMUST00000031263|ref|XM_006535278|gb|AJ583504	chr5:104035678-104035619	mm|5qE5	GO:0005886(plasma membrane)|GO:0005887(integral to plasma membrane)|GO:0006810(transport)|GO:0006811(ion transport)|GO:0006814(sodium ion transport)|GO:0008508(bile acid:sodium symporter activity)|GO:0015293(symporter activity)|GO:0015721(bile acid and bile salt transport)|GO:0016020(membrane)|GO:0016021(integral to membrane)|GO:0035725(sodium ion transmembrane transport)|GO:0043250(sodium-depend…	AGAGACCAGTGCTTTCTTGGATAAAGGGGATGAGGCTGCCGTAACTCTGGGGCCAGTGCA	345274	SLC10A6	0
A_55_P2217598	2.06908	0.0101021	D10Ertd755e	DNA segment, Chr 10, ERATO Doi 755, expressed	Mus musculus 3 days neonate thymus cDNA, RIKEN full-length enriched library, clone:A630024B09 product:unclassifiable, full insert sequence. [AK080282]		AK080282	52038	chr10	45183854	45183795	-	694	190	254	A_55_P2217598	FALSE	Mm.338663			gb|AK080282|riken|A630024B09|nap|NAP013890-001	chr10:45183854-45183795	mm|10qB2		AACTTACAACCTGTCTTTAGCTCCAGTATCAGGGCATCAGACAGTTTCTTCTGCCCTTCT			0
A_52_P381799	2.06748	0.000314804	Neto2	neuropilin (NRP) and tolloid (TLL)-like 2	Mus musculus neuropilin (NRP) and tolloid (TLL)-like 2 (Neto2), mRNA [NM_001081324]	NM_001081324	NM_001081324	74513	chr8	88164375	88164316	-	54229	27	112	A_52_P381799	FALSE	Mm.126079	ENSMUST00000109686		ref|NM_001081324|ens|ENSMUST00000109686|ref|XM_006531437|ref|XM_006531439	chr8:088164375-088164316	mm|8qC3	GO:0005886(plasma membrane)|GO:0014069(postsynaptic density)|GO:0016020(membrane)|GO:0016021(integral to membrane)|GO:0032983(kainate selective glutamate receptor complex)|GO:0035255(ionotropic glutamate receptor binding)|GO:0045202(synapse)|GO:2000312(regulation of kainate selective glutamate receptor activity)|GO:2000463(positive regulation of excitatory postsynaptic membrane potential)	TCTCCGCATCCAATCTTGTTCTATCAAATTTAGAAAGCCCTTCATAACTTATCATAATGC	81831	NETO2	0
A_51_P511015	2.06482	0.00198165	Fzd9	frizzled homolog 9 (Drosophila)	Mus musculus frizzled homolog 9 (Drosophila) (Fzd9), mRNA [NM_010246]	NM_010246	NM_010246	14371	chr5	135724874	135724815	-	38436	75	210	A_51_P511015	FALSE	Mm.6256	ENSMUST00000062572		ref|NM_010246|ens|ENSMUST00000062572|gb|AK021164|tc|TC1587026	chr5:135724874-135724815	mm|5qG2	GO:0004871(signal transducer activity)|GO:0004888(transmembrane signaling receptor activity)|GO:0004930(G-protein coupled receptor activity)|GO:0005737(cytoplasm)|GO:0005886(plasma membrane)|GO:0007165(signal transduction)|GO:0007166(cell surface receptor signaling pathway)|GO:0007186(G-protein coupled receptor signaling pathway)|GO:0007275(multicellular organismal development)|GO:0007405(neurobl…	TATTTAATGATGTAATTTATTGTGGCATTTCTCTGGAAGCTGTGACTGGAATAAACCCTC	8326	FZD9	0
A_55_P2123566	2.06288	0.00538382	Sipa1l2	signal-induced proliferation-associated 1 like 2	Mus musculus adult male testis cDNA, RIKEN full-length enriched library, clone:4930515A19 product:hypothetical protein, full insert sequence. [AK132916]		AK132916	244668	chr8	128040891	128040832	-	25346	115	150	A_55_P2123566	FALSE	Mm.271668			gb|AK132916|riken|4930515A19	chr8:128040891-128040832	mm|8qE2	GO:0003674(molecular_function)|GO:0005096(GTPase activator activity)|GO:0005575(cellular_component)|GO:0008150(biological_process)|GO:0051056(regulation of small GTPase mediated signal transduction)	ACTTAGGCAGGAGGATTGTGAACTCTGGACTAGGTTGGGCTACATATGAGACATTGTTTC	57568	SIPA1L2	0
A_55_P2023012	2.06079	0.0021691	4930449I24Rik	RIKEN cDNA 4930449I24 gene	Mus musculus RIKEN cDNA 4930449I24 gene (4930449I24Rik), mRNA [NM_026136]	NM_026136	NM_026136	67410	chr5	147316609	147316668	+	43064	61	138	A_55_P2023012	FALSE	Mm.463005			ref|NM_026136|ref|NM_001243104|ref|NM_001243114|ref|NM_001243111	chr5:147316609-147316668	mm|5qG3	GO:0003674(molecular_function)|GO:0005575(cellular_component)|GO:0008150(biological_process)	CAGCTGAGGTTCCCCACCTAAGCTTATCTCATATTTTTAGAGAAAATAACTTATAGCTTT			0
A_52_P276792	2.0588	2.57589e-05	Foxp1	forkhead box P1	Mus musculus forkhead box P1 (Foxp1), transcript variant 1, mRNA [NM_053202]	NM_053202	NM_053202	108655	chr6	98889719	98885382	-	46993	49	152	A_52_P276792	FALSE	Mm.234965	ENSMUST00000177230		ref|NM_053202|ref|NM_001197321|ref|NM_001197322|ens|ENSMUST00000177230	unmapped		GO:0000122(negative regulation of transcription from RNA polymerase II promoter)|GO:0000978(RNA polymerase II core promoter proximal region sequence-specific DNA binding)|GO:0001701(in utero embryonic development)|GO:0002053(positive regulation of mesenchymal cell proliferation)|GO:0002329(pre-B cell differentiation)|GO:0002639(positive regulation of immunoglobulin production)|GO:0003677(DNA bind…	TTTACAGGCTTCCATGGCTGAGAATAGTATACCTCTGTACACTACCGCTTCCATGGGAAA	27086	FOXP1	0
A_66_P111660	2.05711	0.000801607	Mt1	metallothionein 1	Mus musculus metallothionein 1 (Mt1), mRNA [NM_013602]	NM_013602	NM_013602	17748	chr8	96704165	96704224	+	8743	166	227	A_66_P111660	FALSE	Mm.192991	ENSMUST00000034215		ref|NM_013602|ens|ENSMUST00000034215|ref|XM_006530752|gb|AK018727	chr8:096704165-096704224	mm|8qC5	GO:0005507(copper ion binding)|GO:0005622(intracellular)|GO:0005623(cell)|GO:0005764(lysosome)|GO:0005829(cytosol)|GO:0006875(cellular metal ion homeostasis)|GO:0006882(cellular zinc ion homeostasis)|GO:0007263(nitric oxide mediated signal transduction)|GO:0008270(zinc ion binding)|GO:0010273(detoxification of copper ion)|GO:0043524(negative regulation of neuron apoptotic process)|GO:0046872(meta…	CCTGTTTACTAAACCCCCGTTTTCTACCGAGTACGTGAATAATAAAAGCCTGTTTGAGTC	4490	MT1B	0
A_51_P451957	2.0563	0.0362556	Cpne6	copine VI	Mus musculus copine VI (Cpne6), transcript variant 2, mRNA [NM_009947]	NM_009947	NM_009947	12891	chr14	56136182	56136241	+	13666	151	221	A_51_P451957	FALSE	Mm.5249	ENSMUST00000171643		ref|NM_009947|ref|NM_001136057|ref|NM_001146183|ens|ENSMUST00000171643	chr14:056136182-056136241	mm|14qC3	GO:0001786(phosphatidylserine binding)|GO:0016020(membrane)|GO:0030424(axon)|GO:0030425(dendrite)|GO:0070062(extracellular vesicular exosome)	GATATCCCTCAACTCTGAGGACCCTCAATAACTTCCTCCAGTGGTTGTGACTTTATGGAT	9362	CPNE6	0
A_51_P343429	2.04648	1.46425e-05	Slc25a37	solute carrier family 25, member 37	Mus musculus solute carrier family 25, member 37 (Slc25a37), mRNA [NM_026331]	NM_026331	NM_026331	67712	chr14	69860079	69860020	-	16622	142	213	A_51_P343429	FALSE	Mm.293635	ENSMUST00000184497		ref|NM_026331|ens|ENSMUST00000184497|ens|ENSMUST00000037064|ref|XM_006519461	chr14:069860079-069860020	mm|14qD2	GO:0005739(mitochondrion)	TAAGAGTGGCCTAGTGTTGCTTTCCGAATGTCTTAAAATACCTGTGGTCAAGATTGTTTT	51312	SLC25A37	0
A_52_P510202	2.04612	0.000318035	9930014A18Rik	RIKEN cDNA 9930014A18 gene	Mus musculus RIKEN cDNA 9930014A18 gene (9930014A18Rik), long non-coding RNA [NR_030696]	NR_030696	NR_030696	320469	chr15	60662750	60662809	+	26058	113	38	A_52_P510202	FALSE	Mm.230853			ref|NR_030696|gb|AK035741|gb|BC099672|gb|AK036813	chr15:60662750-60662809	mm|15qD1		AATTCTAGATTCCTGATTTGTTCCCAAGAGAGTGAGTTGTTATAAGAGCAAGCCTGATTG			0
A_55_P2437763	2.04262	0.0266886	8430431K14Rik	RIKEN cDNA 8430431K14 gene	Mus musculus RIKEN cDNA 8430431K14 gene (8430431K14Rik), long non-coding RNA [NR_002849]	NR_002849	NR_002849	78103	chr19	31288725	31288666	-	25837	114	151	A_55_P2437763	FALSE	Mm.445198			ref|NR_002849|gb|AK020237|gb|BC020133|gb|AK046503	chr19:31288725-31288666	mm|19qC1		CTTATGGAAGCATTTTCTCATTTGATGTTCCTTCTTAGATGACTGTACCTTGTATCATGT			0
A_51_P246066	2.04138	0.000235544	Slamf9	SLAM family member 9	Mus musculus SLAM family member 9 (Slamf9), mRNA [NM_029612]	NM_029612	NM_029612	98365	chr1	174408455	174408514	+	29469	103	103	A_51_P246066	FALSE	Mm.150050	ENSMUST00000027830		ref|NM_029612|ens|ENSMUST00000027830|ref|XM_006497067|ref|XM_006497068	chr1:174408455-174408514	mm|1qH3	GO:0003674(molecular_function)|GO:0004872(receptor activity)|GO:0005575(cellular_component)|GO:0008150(biological_process)|GO:0016020(membrane)|GO:0016021(integral to membrane)	TGGGATTGGGATCAGAGTTGAACATCTAAAAGAGCAGTATTCCCTGAGAGACACCATCTG	89886	SLAMF9	0
A_55_P1994630	2.03963	0.0117139	Dpp6	dipeptidylpeptidase 6	Mus musculus 10 days neonate cerebellum cDNA, RIKEN full-length enriched library, clone:B930011P16 product:hypothetical protein, full insert sequence. [AK047025]		AK047025	13483	chr5	27378607	27378666	+	50352	39	321	A_55_P1994630	FALSE				gb|AK047025|tc|TC1593441|riken|B930011P16	chr5:27378607-27378666	mm|5qB1	GO:0005515(protein binding)|GO:0005886(plasma membrane)|GO:0006508(proteolysis)|GO:0008076(voltage-gated potassium channel complex)|GO:0008236(serine-type peptidase activity)|GO:0009986(cell surface)|GO:0015459(potassium channel regulator activity)|GO:0016020(membrane)|GO:0016021(integral to membrane)|GO:0019228(regulation of action potential in neuron)|GO:0042391(regulation of membrane potential…	GCATTAATTAAGTTTCTGATATAGAGTCGAACTAATGACATAGAGCTAGATGTAGCCTCA	1804	DPP6	0
A_51_P130544	2.03627	0.000635809	Gas5	growth arrest specific 5	Mus musculus growth arrest specific 5 (Gas5), long non-coding RNA [NR_002840]	NR_002840	NR_002840	14455	chr1	162966369	162966428	+	43577	60	95	A_51_P130544	FALSE	Mm.270065			ref|NR_002840|gb|BC004622|gb|BC080708|gb|AK083453	chr1:162966369-162966428	mm|1qH2.1		GCGCAATGTAAGCAATTTTGTGTGTGCATGTGGTCCCATTACAAGGAATACCCAATGGCA			0
A_52_P305995	2.03572	0.000251348	Ammecr1	Alport syndrome, mental retardation, midface hypoplasia and elliptocytosis chromosomal region gene 1	Mus musculus Alport syndrome, mental retardation, midface hypoplasia and elliptocytosis chromosomal region gene 1 (Ammecr1), mRNA [NM_019496]	NM_019496	NM_019496	56068	chrX	139288150	139288091	-	25937	113	280	A_52_P305995	FALSE	Mm.143724			ref|NM_019496|gb|AK051736|gb|AK018092|tc|TC1586824	chrX:139288150-139288091	mm|XqF2	GO:0003674(molecular_function)|GO:0005575(cellular_component)|GO:0008150(biological_process)	CATTTTCTTGCCCTTATAGGGAAAGTGAGCACAAGCTGAATGATATTGTCTGCTAGGAAA	9949	AMMECR1	0
A_66_P118699	2.03531	1.03394e-05	Rorb	RAR-related orphan receptor beta	Mus musculus RAR-related orphan receptor beta (Rorb), transcript variant 1, mRNA [NM_001043354]	NM_001043354	NM_001043354	225998	chr19	19006942	19006883	-	22390	124	158	A_66_P118699	FALSE	Mm.234641	ENSMUST00000112832		ref|NM_001043354|ref|NM_001289921|ref|NM_146095|ens|ENSMUST00000112832	chr19:019006942-019006883	mm|19qB	GO:0003677(DNA binding)|GO:0003700(sequence-specific DNA binding transcription factor activity)|GO:0003707(steroid hormone receptor activity)|GO:0004879(ligand-activated sequence-specific DNA binding RNA polymerase II transcription factor activity)|GO:0005515(protein binding)|GO:0005634(nucleus)|GO:0006351(transcription, DNA-dependent)|GO:0006355(regulation of transcription, DNA-dependent)|GO:000…	TGGTGGGCGCTCCCATGTCACCAGCACAGCCGTACATAGACACTCATGAAGAATGTCTGA	6096	RORB	0
A_55_P2185504	2.0317	0.00178463	Masp2	mannan-binding lectin serine peptidase 2	Mus musculus mannan-binding lectin serine peptidase 2 (Masp2), transcript variant 2, mRNA [NM_010767]	NM_010767	NM_010767	17175	chr4	147978456	147978515	+	45259	55	11	A_55_P2185504	FALSE	Mm.378962	ENSMUST00000136647		ref|NM_010767|ens|ENSMUST00000136647|gb|AJ250369|gb|Y19160	chr4:147978456-147978515	mm|4qE2	GO:0001855(complement component C4b binding)|GO:0001867(complement activation, lectin pathway)|GO:0002376(immune system process)|GO:0004252(serine-type endopeptidase activity)|GO:0005509(calcium ion binding)|GO:0005515(protein binding)|GO:0005576(extracellular region)|GO:0006508(proteolysis)|GO:0006956(complement activation)|GO:0006958(complement activation, classical pathway)|GO:0008233(peptidas…	AGGCTGGAATGACTGCCAGCTACAGCACCCATTCACCTTAACCATGACAATAATAAACCT	10747	MASP2	0
A_55_P2010758	2.02634	2.84128e-05	Npm3	nucleoplasmin 3	Mus musculus nucleoplasmin 3 (Npm3), mRNA [NM_008723]	NM_008723	NM_008723	18150	chr19	45822331	45822272	-	26176	113	129	A_55_P2010758	FALSE	Mm.1406	ENSMUST00000070215		ref|NM_008723|ref|NR_002702|ens|ENSMUST00000070215|gb|AK157198	chr19:045822331-045822272	mm|19qC3	GO:0003676(nucleic acid binding)|GO:0005515(protein binding)|GO:0005634(nucleus)|GO:0005730(nucleolus)|GO:0006364(rRNA processing)|GO:0009303(rRNA transcription)	CAAAAAACAAAAAACAAAAGAACATGAAGTTCAGAACACATTTTTAACACTTTGTACTTT	10360	NPM3	0
A_52_P406828	2.02395	0.000151394	Dkc1	dyskeratosis congenita 1, dyskerin	Mus musculus dyskeratosis congenita 1, dyskerin (Dkc1), mRNA [NM_001030307]	NM_001030307	NM_001030307	245474	chrX	72354473	72354532	+	17682	139	61	A_52_P406828	FALSE	Mm.291062	ENSMUST00000033776		ref|NM_001030307|ens|ENSMUST00000033776|ref|XM_006528023|gb|AK166105	chrX:072354473-072354532	mm|XqA7.3	GO:0000154(rRNA modification)|GO:0000495(box H/ACA snoRNA 3'-end processing)|GO:0001522(pseudouridine synthesis)|GO:0003720(telomerase activity)|GO:0003723(RNA binding)|GO:0005634(nucleus)|GO:0005654(nucleoplasm)|GO:0005697(telomerase holoenzyme complex)|GO:0005730(nucleolus)|GO:0005732(small nucleolar ribonucleoprotein complex)|GO:0006278(RNA-dependent DNA replication)|GO:0006364(rRNA processing…	TAAAATGGTATAGAACCTTCTGTGAGAGAAAAAATGTAATTGAACTATGTTCACTGGGGG	1736	DKC1	0
A_55_P2072115	2.0216	0.00922829	AW011738	expressed sequence AW011738	Mus musculus expressed sequence AW011738 (AW011738), long non-coding RNA [NR_030671]	NR_030671	NR_030671	100382	chr4	155578638	155578697	+	53574	29	110	A_55_P2072115	FALSE	Mm.483291	ENSMUST00000105140		ref|NR_030671|ens|ENSMUST00000105140|gb|AK156747|gb|AK086145	chr4:155578638-155578697	mm|4qE2		TTGTGATGTATGCATGTGCTACTATGTATCCATGGGCAAACAGCAAGACTTCTGCCAGGA			0
A_51_P389664	2.02075	3.07303e-05	Scrt2	scratch homolog 2, zinc finger protein (Drosophila)	Mus musculus scratch homolog 2, zinc finger protein (Drosophila) (Scrt2), mRNA [NM_001160410]	NM_001160410	NM_001160410	545474	chr2	151921462	151921521	+	16045	144	55	A_51_P389664	FALSE	Mm.214317	ENSMUST00000064061		ref|NM_001160410|ens|ENSMUST00000064061|gb|AK090280|tc|TC1604118	chr2:151921462-151921521	mm|2qG3	GO:0000122(negative regulation of transcription from RNA polymerase II promoter)|GO:0003676(nucleic acid binding)|GO:0003677(DNA binding)|GO:0005634(nucleus)|GO:0006351(transcription, DNA-dependent)|GO:0006355(regulation of transcription, DNA-dependent)|GO:0046872(metal ion binding)|GO:2001222(regulation of neuron migration)	ACCCCTATTCCTTCCCCACCTTCAGCAGTATTACTTGTAACGCAATTCAGGGATATTAAA	85508	SCRT2	0
A_55_P1990500	2.01558	0.00279755	Masp2	mannan-binding lectin serine peptidase 2	Mus musculus mannan-binding lectin serine peptidase 2 (Masp2), transcript variant 2, mRNA [NM_010767]	NM_010767	NM_010767	17175	chr4	147977855	147977914	+	59297	12	143	A_55_P1990500	FALSE	Mm.378962	ENSMUST00000136647		ref|NM_010767|ens|ENSMUST00000136647|ens|ENSMUST00000154898|ref|XR_390730	chr4:147977855-147977914	mm|4qE2	GO:0001855(complement component C4b binding)|GO:0001867(complement activation, lectin pathway)|GO:0002376(immune system process)|GO:0004252(serine-type endopeptidase activity)|GO:0005509(calcium ion binding)|GO:0005515(protein binding)|GO:0005576(extracellular region)|GO:0006508(proteolysis)|GO:0006956(complement activation)|GO:0006958(complement activation, classical pathway)|GO:0008233(peptidas…	AACTACTTGGGCGGCTACTATTGCTCCTGCAGAGCGGGCTACGTTCTCCACCAGAACAAG	10747	MASP2	0
A_51_P440743	2.01411	0.00149907	Celsr1	cadherin, EGF LAG seven-pass G-type receptor 1 (flamingo homolog, Drosophila)	Mus musculus cadherin, EGF LAG seven-pass G-type receptor 1 (flamingo homolog, Drosophila) (Celsr1), mRNA [NM_009886]	NM_009886	NM_009886	12614	chr15	85729440	85729381	-	48183	46	67	A_51_P440743	FALSE	Mm.22680	ENSMUST00000016172		ref|NM_009886|ens|ENSMUST00000016172|ref|XM_006520379|ref|XM_006520380	chr15:085729440-085729381	mm|15qE2	GO:0001702(gastrulation with mouth forming second)|GO:0001736(establishment of planar polarity)|GO:0001764(neuron migration)|GO:0001843(neural tube closure)|GO:0001942(hair follicle development)|GO:0004871(signal transducer activity)|GO:0004888(transmembrane signaling receptor activity)|GO:0004930(G-protein coupled receptor activity)|GO:0005509(calcium ion binding)|GO:0005515(protein binding)|GO:…	GTGTATTTATTACTGTTCAGCACTGGATGGCAACACAGGTGAGATGATGCATCTATAATA	9620	CELSR1	0
A_51_P438083	2.01037	0.000262164	Slc6a13	solute carrier family 6 (neurotransmitter transporter, GABA), member 13	Mus musculus solute carrier family 6 (neurotransmitter transporter, GABA), member 13 (Slc6a13), mRNA [NM_144512]	NM_144512	NM_144512	14412	chr6	121287597	121287656	+	50123	40	123	A_51_P438083	FALSE	Mm.258596	ENSMUST00000064580		ref|NM_144512|ens|ENSMUST00000064580|ref|XM_006505538|ref|XM_006505537	chr6:121287597-121287656	mm|6qF1	GO:0003333(amino acid transmembrane transport)|GO:0005328(neurotransmitter:sodium symporter activity)|GO:0005332(gamma-aminobutyric acid:sodium symporter activity)|GO:0005886(plasma membrane)|GO:0005887(integral to plasma membrane)|GO:0006810(transport)|GO:0006836(neurotransmitter transport)|GO:0015293(symporter activity)|GO:0015812(gamma-aminobutyric acid transport)|GO:0016020(membrane)|GO:00160…	GGTCCACACATTGTGACGTGCCCGAATCAATAACATCCCATTGAGGCAGCTTGGGAAGCC	6540	SLC6A13	0
A_51_P175699	2.00769	0.000339785	Mtfp1	mitochondrial fission process 1	Mus musculus mitochondrial fission process 1 (Mtfp1), mRNA [NM_026443]	NM_026443	NM_026443	67900	chr11	3991618	3991559	-	1911	187	115	A_51_P175699	FALSE	Mm.41719	ENSMUST00000004868		ref|NM_026443|ens|ENSMUST00000004868|gb|AK006148|gb|AK010971	chr11:003991618-003991559	mm|11qA1	GO:0000266(mitochondrial fission)|GO:0003674(molecular_function)|GO:0005739(mitochondrion)|GO:0005743(mitochondrial inner membrane)|GO:0006915(apoptotic process)|GO:0007006(mitochondrial membrane organization)|GO:0016020(membrane)|GO:0016021(integral to membrane)	ACAGAGGTACAGTATTTGGGACACTCAGGGCAGAGTCTCTGGCCAGCCTGTTCCTGTTGC	51537	MTFP1	0
A_55_P2362096	2.00594	4.6846e-05	4921516I12Rik	RIKEN cDNA 4921516I12 gene	Mus musculus adult male testis cDNA, RIKEN full-length enriched library, clone:4921516I12 product:unclassifiable, full insert sequence. [AK014902]		AK014902	70870	chr12	56698265	56698206	-	18875	135	299	A_55_P2362096	FALSE	Mm.114886			gb|AK014902|gb|AV255085|riken|4921516I12|nap|NAP073234-1	chr12:56698265-56698206	mm|12qC1		CTGACCCTGCCAGCTGAAAGTCACTCCTTCAGTTAAAAAATAAAGACTTTAAAATTCCGG			0
A_55_P2018403	2.00269	0.000607703	Sycp1	synaptonemal complex protein 1	Mus musculus synaptonemal complex protein 1 (Sycp1), mRNA [NM_011516]	NM_011516	NM_011516	20957	chr3	102622632	102622573	-	24586	118	29	A_55_P2018403	FALSE	Mm.243849	ENSMUST00000029448		ref|NM_011516|ens|ENSMUST00000029448|ref|XM_011251869|gb|Z38118	chr3:102622632-102622573	mm|3qF2.2	GO:0000711(meiotic DNA repair synthesis)|GO:0000794(condensed nuclear chromosome)|GO:0000795(synaptonemal complex)|GO:0000800(lateral element)|GO:0000801(central element)|GO:0000802(transverse filament)|GO:0001673(male germ cell nucleus)|GO:0003677(DNA binding)|GO:0005515(protein binding)|GO:0005634(nucleus)|GO:0005694(chromosome)|GO:0007049(cell cycle)|GO:0007130(synaptonemal complex assembly)|G…	TAACTTGGGTTTATGTTACTATATTTGTGGCCTAAAAATAAAATAACTATATTTCATCTG	6847	SYCP1	0
A_52_P183826	1.99604	0.000803212	Dctd	dCMP deaminase	Mus musculus dCMP deaminase (Dctd), transcript variant 1, mRNA [NM_178788]	NM_178788	NM_178788	320685	chr8	49197399	49222612	+	34830	86	206	A_52_P183826	FALSE	Mm.121549	ENSMUST00000173991		ref|NM_178788|ref|NM_001161515|ref|NM_001161516|ens|ENSMUST00000173991	chr8:049197399-049197457	mm|8qB1.2	GO:0003824(catalytic activity)|GO:0004132(dCMP deaminase activity)|GO:0006220(pyrimidine nucleotide metabolic process)|GO:0008150(biological_process)|GO:0008152(metabolic process)|GO:0008270(zinc ion binding)|GO:0009165(nucleotide biosynthetic process)|GO:0016787(hydrolase activity)|GO:0046872(metal ion binding)|GO:0070062(extracellular vesicular exosome)	TGACCTGTTGCCTTGGAGGAGAACAGCAGAAAATAAGCTGGATACTAAATATCCTTATGT	1635	DCTD	0
A_66_P138584	1.99569	0.00500162	Mnd1	meiotic nuclear divisions 1 homolog (S. cerevisiae)	Mus musculus meiotic nuclear divisions 1 homolog (S. cerevisiae) (Mnd1), mRNA [NM_029797]	NM_029797	NM_029797	76915	chr3	83920359	83908923	-	10525	160	272	A_66_P138584	FALSE	Mm.274829	ENSMUST00000047368		ref|NM_029797|ens|ENSMUST00000047368|ref|XM_011240279|ref|XM_006502261	unmapped		GO:0003677(DNA binding)|GO:0005515(protein binding)|GO:0005634(nucleus)|GO:0006310(DNA recombination)|GO:0051321(meiotic cell cycle)	GGCAAGAGACGGAAGAACGAGCCATGCTTGCAAAAGAACTTTCTTCATTTCGAGACCAAA	84057	MND1	0
A_52_P182520	1.99488	0.000781372	Timm9	translocase of inner mitochondrial membrane 9	Mus musculus translocase of inner mitochondrial membrane 9 homolog (yeast), mRNA (cDNA clone IMAGE:1332217), with apparent retained intron. [BC028435]		BC028435	30056	chr12	72236759	72236700	-	40788	68	98	A_52_P182520	FALSE				gb|BC028435|gb|AK171071|gb|AK012712|tc|TC1700516	chr12:72236759-72236700	mm|12qC3	GO:0005215(transporter activity)|GO:0005739(mitochondrion)|GO:0005743(mitochondrial inner membrane)|GO:0006810(transport)|GO:0015031(protein transport)|GO:0016020(membrane)|GO:0042719(mitochondrial intermembrane space protein transporter complex)|GO:0042803(protein homodimerization activity)|GO:0045039(protein import into mitochondrial inner membrane)|GO:0046872(metal ion binding)|GO:0051087(chap…	CTTCCTTGAGGCTAGACTTTGAATCGGGAAACAATAGGAATTCATTTTCAAGTGCTTTTA	26520	TIMM9	0
A_51_P166456	1.99478	0.00130956	Fzd5	frizzled homolog 5 (Drosophila)	Mus musculus frizzled homolog 5 (Drosophila) (Fzd5), transcript variant 1, mRNA [NM_022721]	NM_022721	NM_022721	14367	chr1	64782030	64781972	-	17286	140	197	A_51_P166456	FALSE	Mm.150813	ENSMUST00000116133		ref|NM_022721|ref|NM_001042659|ens|ENSMUST00000116133|ens|ENSMUST00000063982	chr1:064782030-064781972	mm|1qC2	GO:0000578(embryonic axis specification)|GO:0001525(angiogenesis)|GO:0001944(vasculature development)|GO:0002726(positive regulation of T cell cytokine production)|GO:0004871(signal transducer activity)|GO:0004888(transmembrane signaling receptor activity)|GO:0004930(G-protein coupled receptor activity)|GO:0005515(protein binding)|GO:0005769(early endosome)|GO:0005794(Golgi apparatus)|GO:0005886(…	ACGGGGACCCAGTGGCTGGCATCTGCTATGTGGGCAACCAAAACCTGAACTCACTACGAA	7855	FZD5	0
A_55_P1956647	1.99302	0.00679864	Sfmbt2	Scm-like with four mbt domains 2	Mus musculus Scm-like with four mbt domains 2 (Sfmbt2), transcript variant 1, mRNA [NM_177386]	NM_177386	NM_177386	353282	chr2	10516716	10516775	+	45229	55	71	A_55_P1956647	FALSE	Mm.329991	ENSMUST00000041105		ref|NM_177386|ref|NM_001198808|ens|ENSMUST00000041105|ens|ENSMUST00000116594	chr2:010516716-010516775	mm|2qA1	GO:0005634(nucleus)|GO:0005654(nucleoplasm)|GO:0006355(regulation of transcription, DNA-dependent)|GO:0010629(negative regulation of gene expression)|GO:0016235(aggresome)|GO:0042393(histone binding)|GO:0043231(intracellular membrane-bounded organelle)	GCTCTCTCAGTTTGCTGTAAGATTGTATTCTGTAGATATGTTTCCATGTACATAAAGGAA	57713	SFMBT2	0
A_55_P2088825	1.99099	5.02811e-05	Foxp1	forkhead box P1	Mus musculus forkhead box P1 (Foxp1), transcript variant 1, mRNA [NM_053202]	NM_053202	NM_053202	108655	chr6	98880143	98880084	-	18019	138	43	A_55_P2088825	FALSE	Mm.234965	ENSMUST00000177230		ref|NM_053202|ref|NM_001197321|ref|NM_001197322|ens|ENSMUST00000177230	chr6:098880143-098880084	mm|6qD3	GO:0000122(negative regulation of transcription from RNA polymerase II promoter)|GO:0000978(RNA polymerase II core promoter proximal region sequence-specific DNA binding)|GO:0001701(in utero embryonic development)|GO:0002053(positive regulation of mesenchymal cell proliferation)|GO:0002329(pre-B cell differentiation)|GO:0002639(positive regulation of immunoglobulin production)|GO:0003677(DNA bind…	CCAGATTTTGACCATGACAGAGATTACGAAGACGAACCAGTAAATGAGGACATGGAGTGA	27086	FOXP1	0
A_55_P2002572	1.99082	0.000529757	Ephx2	epoxide hydrolase 2, cytoplasmic	Mus musculus epoxide hydrolase 2, cytoplasmic (Ephx2), transcript variant 2, mRNA [NM_001271402]	NM_001271402	NM_001271402	13850	chr14	66703273	66703214	-	30508	99	322	A_55_P2002572	FALSE	Mm.15295			ref|NM_001271402|ref|NM_007940|ref|NM_001271421|ref|NM_001271403	chr14:066703273-066703214	mm|14qD1	GO:0000287(magnesium ion binding)|GO:0002539(prostaglandin production involved in inflammatory response)|GO:0003824(catalytic activity)|GO:0004301(epoxide hydrolase activity)|GO:0005102(receptor binding)|GO:0005737(cytoplasm)|GO:0005777(peroxisome)|GO:0005829(cytosol)|GO:0006629(lipid metabolic process)|GO:0006954(inflammatory response)|GO:0008152(metabolic process)|GO:0009636(response to toxin)|…	TTTTTGAAGCAGCTGATTGGAGAGTAAAGATTTTCATTCAATAAAGCTAAACCTCAGGGC	2053	EPHX2	0
A_52_P142888	1.99074	0.136255	Clec5a	C-type lectin domain family 5, member a	Mus musculus C-type lectin domain family 5, member a (Clec5a), transcript variant 1, mRNA [NM_001038604]	NM_001038604	NM_001038604	23845	chr6	40525175	40525116	-	49914	40	214	A_52_P142888	FALSE	Mm.103765	ENSMUST00000101491		ref|NM_001038604|ref|NM_021364|ens|ENSMUST00000101491|gb|AK036697	chr6:040525175-040525116	mm|6qB1	GO:0001618(viral receptor activity)|GO:0002076(osteoblast development)|GO:0002376(immune system process)|GO:0005515(protein binding)|GO:0005886(plasma membrane)|GO:0009986(cell surface)|GO:0016020(membrane)|GO:0016021(integral to membrane)|GO:0030099(myeloid cell differentiation)|GO:0030246(carbohydrate binding)|GO:0033033(negative regulation of myeloid cell apoptotic process)|GO:0043066(negative…	AGGAAAGGATATGGTTATATCAACACATCTTATTTTGTTAATAGTCTTGAGCTCTCAGCC	23601	CLEC5A	0
A_55_P2074688	1.98494	0.000152604	Hoxc4	homeobox C4	Mus musculus homeobox C4 (Hoxc4), mRNA [NM_013553]	NM_013553	NM_013553	15423	chr15	102867213	102867272	+	22232	125	145	A_55_P2074688	FALSE	Mm.1351	ENSMUST00000100164		ref|NM_013553|ens|ENSMUST00000100164|ref|XM_011245460|ref|XM_006520462	chr15:102867213-102867272	mm|15qF3	GO:0001501(skeletal system development)|GO:0003677(DNA binding)|GO:0003700(sequence-specific DNA binding transcription factor activity)|GO:0005634(nucleus)|GO:0006351(transcription, DNA-dependent)|GO:0006355(regulation of transcription, DNA-dependent)|GO:0007275(multicellular organismal development)|GO:0009952(anterior/posterior pattern specification)|GO:0043565(sequence-specific DNA binding)|GO:…	ATAAAGAATTTTAGTGTTGATGTGAAATGCCCCGTGATCAATAATAAACCAGTGGCTGTG	3221	HOXC4	0
A_55_P2067662	1.98413	0.00249365	Znhit6	zinc finger, HIT type 6	Mus musculus zinc finger, HIT type 6 (Znhit6), mRNA [NM_001081094]	NM_001081094	NM_001081094	229937	chr3	145268134	145268193	+	31667	96	299	A_55_P2067662	FALSE	Mm.24586	ENSMUST00000098534		ref|NM_001081094|ens|ENSMUST00000098534|tc|TC1669301	chr3:145268134-145268193	mm|3qH2	GO:0000492(box C/D snoRNP assembly)|GO:0019899(enzyme binding)|GO:0042254(ribosome biogenesis)|GO:0042802(identical protein binding)|GO:0046872(metal ion binding)|GO:0070062(extracellular vesicular exosome)|GO:0070761(pre-snoRNP complex)	AATAATCGTGTTATACTTACAGGGGGTGAGGTTGGAATAGTTTGCTGAGAGCCCTGGAAG	54680	ZNHIT6	0
A_55_P2429225	1.98147	0.000239531	Psrc1	proline/serine-rich coiled-coil 1	Mus musculus proline/serine-rich coiled-coil 1 (Psrc1), transcript variant 1, mRNA [NM_001190161]	NM_001190161	NM_001190161	56742	chr3	108190744	108190803	+	35124	85	274	A_55_P2429225	FALSE	Mm.389499	ENSMUST00000090561		ref|NM_001190161|ref|NM_019976|ens|ENSMUST00000090561|ens|ENSMUST00000102629	chr3:108190744-108190803	mm|3qF3	GO:0000922(spindle pole)|GO:0001578(microtubule bundle formation)|GO:0005515(protein binding)|GO:0005654(nucleoplasm)|GO:0005737(cytoplasm)|GO:0005819(spindle)|GO:0005829(cytosol)|GO:0005856(cytoskeleton)|GO:0005876(spindle microtubule)|GO:0007049(cell cycle)|GO:0007067(mitosis)|GO:0007080(mitotic metaphase plate congression)|GO:0008017(microtubule binding)|GO:0009987(cellular process)|GO:0015630…	AAGAGAGGGGCAGAGGTCATCTGCCCGTGGAGAAACTCACAAACAAAATAATAAATGCAG	84722	PSRC1	0
A_55_P2033381	1.98102	0.0189847	1810041L15Rik	RIKEN cDNA 1810041L15 gene	Mus musculus RIKEN cDNA 1810041L15 gene (1810041L15Rik), mRNA [NM_001163145]	NM_001163145	NM_001163145	72301	chr15	84214211	84214152	-	42714	62	182	A_55_P2033381	FALSE	Mm.275387	ENSMUST00000080751		ref|NM_001163145|ens|ENSMUST00000080751|ref|XM_006521445|ref|XM_006521441	chr15:084214211-084214152	mm|15qE2	GO:0003674(molecular_function)|GO:0005575(cellular_component)|GO:0008150(biological_process)|GO:0016020(membrane)|GO:0016021(integral to membrane)	ACAACTGTGAACCAGTGGAGTCGGTAGGCACAGTGCCTAACCTTCCTGTCCATGCCGCAA	85352	KIAA1644	0
A_55_P2082203	1.97947	0.000805733	Baz1a	bromodomain adjacent to zinc finger domain 1A	Mus musculus bromodomain adjacent to zinc finger domain 1A (Baz1a), mRNA [NM_013815]	NM_013815	NM_013815	217578	chr12	55994867	55994808	-	18501	136	64	A_55_P2082203	FALSE	Mm.479583	ENSMUST00000173433		ref|NM_013815|ens|ENSMUST00000173433|ens|ENSMUST00000038926|ref|XM_006515671	chr12:055994867-055994808	mm|12qC1	GO:0000228(nuclear chromosome)|GO:0005515(protein binding)|GO:0005634(nucleus)|GO:0006261(DNA-dependent DNA replication)|GO:0006338(chromatin remodeling)|GO:0006351(transcription, DNA-dependent)|GO:0006355(regulation of transcription, DNA-dependent)|GO:0008270(zinc ion binding)|GO:0008623(chromatin accessibility complex)|GO:0046872(metal ion binding)	TGAGCACATGGTTTCAACACTACACATGAATGAATCCAATTCTCTAGCTCTGACGTGCTG	11177	BAZ1A	0
A_55_P2229239	1.97839	0.022352	9430014F16Rik	RIKEN cDNA 9430014F16 gene	Mus musculus 12 days embryo male wolffian duct includes surrounding region cDNA, RIKEN full-length enriched library, clone:6720449H16 product:Selenoprotein homolog [Mus musculus], full insert sequence. [AK135264]		AK135264	77255	chr3	144236317	144236376	+	14513	148	168	A_55_P2229239	FALSE	Mm.29812			gb|AK135264|riken|6720449H16	chr3:144236317-144236376	mm|3qH2		AGGTGTCAACTTCATTCTGTTCTTTGTGAATGAGGACCACAAATAAGTACATACTATCTT			0
A_51_P509643	1.97813	0.0301181	Snca	synuclein, alpha	Mus musculus synuclein, alpha (Snca), transcript variant 1, mRNA [NM_001042451]	NM_001042451	NM_001042451	20617	chr6	60681916	60681857	-	53367	30	195	A_51_P509643	FALSE	Mm.17484	ENSMUST00000114268		ref|NM_001042451|ref|NM_009221|ens|ENSMUST00000114268|ens|ENSMUST00000163779	chr6:060681916-060681857	mm|6qB3	GO:0000287(magnesium ion binding)|GO:0001774(microglial cell activation)|GO:0001921(positive regulation of receptor recycling)|GO:0001933(negative regulation of protein phosphorylation)|GO:0001956(positive regulation of neurotransmitter secretion)|GO:0001963(synaptic transmission, dopaminergic)|GO:0005507(copper ion binding)|GO:0005509(calcium ion binding)|GO:0005515(protein binding)|GO:0005543(p…	GTCTTGTGTGCTGTGGATATTGTTGTGGCTTCACACTTAAATTGTTAGAAGAAACTTAAA	6622	SNCA	0
A_55_P2033376	1.97802	0.0109917	1810041L15Rik	RIKEN cDNA 1810041L15 gene	Mus musculus RIKEN cDNA 1810041L15 gene (1810041L15Rik), mRNA [NM_001163145]	NM_001163145	NM_001163145	72301	chr15	84209705	84209646	-	20150	131	46	A_55_P2033376	FALSE	Mm.275387	ENSMUST00000080751		ref|NM_001163145|ens|ENSMUST00000080751|ref|XM_006521445|ref|XM_006521441	chr15:084209705-084209646	mm|15qE2	GO:0003674(molecular_function)|GO:0005575(cellular_component)|GO:0008150(biological_process)|GO:0016020(membrane)|GO:0016021(integral to membrane)	GCTGCGTTTGTCTTTCTATAGAGTGGTTTTTATAACGACGTCCTTAGTTTTAATAAAGGA	85352	KIAA1644	0
A_51_P464394	1.97799	0.108218	Klb	klotho beta	Mus musculus klotho beta (Klb), mRNA [NM_031180]	NM_031180	NM_031180	83379	chr5	65774926	65774985	+	5681	175	120	A_51_P464394	FALSE	Mm.45274	ENSMUST00000031096		ref|NM_031180|ens|ENSMUST00000031096|ref|XM_006504204|gb|BC138008	chr5:065774926-065774985	mm|5qC3.1	GO:0004553(hydrolase activity, hydrolyzing O-glycosyl compounds)|GO:0005104(fibroblast growth factor receptor binding)|GO:0005886(plasma membrane)|GO:0005975(carbohydrate metabolic process)|GO:0008284(positive regulation of cell proliferation)|GO:0008543(fibroblast growth factor receptor signaling pathway)|GO:0016020(membrane)|GO:0016021(integral to membrane)|GO:0017134(fibroblast growth factor b…	TTTTCAGCTAAACTGCCATTTCTGTCATAGTTTCAAGATTCACTCCGGCTCCATGTACTG	152831	KLB	0
A_55_P2001688	1.97692	0.0504992	Grid1	glutamate receptor, ionotropic, delta 1	Mus musculus glutamate receptor, ionotropic, delta 1 (Grid1), mRNA [NM_008166]	NM_008166	NM_008166	14803	chr14	36393854	36393913	+	5642	175	198	A_55_P2001688	FALSE	Mm.121569	ENSMUST00000173307		ref|NM_008166|ens|ENSMUST00000173307|gb|BC167177|gb|D10171	chr14:036393854-036393913	mm|14qB	GO:0004872(receptor activity)|GO:0004970(ionotropic glutamate receptor activity)|GO:0005216(ion channel activity)|GO:0005234(extracellular-glutamate-gated ion channel activity)|GO:0005515(protein binding)|GO:0005886(plasma membrane)|GO:0006810(transport)|GO:0006811(ion transport)|GO:0008328(ionotropic glutamate receptor complex)|GO:0016020(membrane)|GO:0016021(integral to membrane)|GO:0030054(cel…	AATTCAGTGCAAACACAGGTCGCCCAATGGGGGACTGTTTCGACAGAGCCCGGTGAAGAC	2894	GRID1	0
A_52_P352099	1.97414	0.0165345	E130307A14Rik	RIKEN cDNA E130307A14 gene	Mus musculus 12 days embryo spinal cord cDNA, RIKEN full-length enriched library, clone:C530050L09 product:unclassifiable, full insert sequence. [AK049799]		AK049799	327744	chr10	39441689	39441630	-	14083	150	43	A_52_P352099	FALSE	Mm.295265			gb|AK049799|tc|TC1622503|riken|C530050L09	chr10:39441689-39441630	mm|10qB1	GO:0003674(molecular_function)|GO:0005575(cellular_component)|GO:0008150(biological_process)	AGTTCTAATCTTTTCGAGTTATTGCCCTAGTATTCCTAAAGTCCTTTGTTAGATTCTCTG			0
A_55_P2039556	1.97274	0.000131464	Pak6	p21 protein (Cdc42/Rac)-activated kinase 6	Mus musculus p21 protein (Cdc42/Rac)-activated kinase 6 (Pak6), transcript variant 1, mRNA [NM_001033254]	NM_001033254	NM_001033254	214230	chr2	118522911	118522970	+	25070	116	46	A_55_P2039556	FALSE	Mm.241857	ENSMUST00000132577		ref|NM_001033254|ref|NM_001145854|ens|ENSMUST00000132577|ens|ENSMUST00000110853	chr2:118522911-118522970	mm|2qE5	GO:0000166(nucleotide binding)|GO:0004672(protein kinase activity)|GO:0004674(protein serine/threonine kinase activity)|GO:0005524(ATP binding)|GO:0005634(nucleus)|GO:0005737(cytoplasm)|GO:0006355(regulation of transcription, DNA-dependent)|GO:0006468(protein phosphorylation)|GO:0007266(Rho protein signal transduction)|GO:0007346(regulation of mitotic cell cycle)|GO:0007612(learning)|GO:0007613(m…	AGCAGCCAGGGGGGAATCTTCTGAGAGAGAGTGGGGTTGGCAGTAAACGTGGTTCCATTG	106821730		0
A_55_P2032445	1.96939	0.00235457	Slc25a37	solute carrier family 25, member 37	Mus musculus solute carrier family 25, member 37 (Slc25a37), mRNA [NM_026331]	NM_026331	NM_026331	67712	chr14	69902856	69902797	-	12102	156	69	A_55_P2032445	FALSE	Mm.293635	ENSMUST00000183840		ref|NM_026331|ens|ENSMUST00000183840|ens|ENSMUST00000183695|ens|ENSMUST00000184914	chr14:069902856-069902797	mm|14qD2	GO:0005739(mitochondrion)	ACATGACAGCGGGAGCGATGGCCGGGATTCTGGAGCACTCCATCATGTACCCGGTGGACT	51312	SLC25A37	0
A_55_P2121985	1.96916	0.00198117	Plcb4	phospholipase C, beta 4	Mus musculus phospholipase C, beta 4 (Plcb4), mRNA [NM_013829]	NM_013829	NM_013829	18798	chr2	135838745	135838804	+	60472	8	90	A_55_P2121985	FALSE	Mm.38009	ENSMUST00000035646		ref|NM_013829|ens|ENSMUST00000035646|ens|ENSMUST00000184371|gb|AF332071	chr2:135838745-135838804	mm|2qF3	GO:0004435(phosphatidylinositol phospholipase C activity)|GO:0005515(protein binding)|GO:0005634(nucleus)|GO:0005737(cytoplasm)|GO:0005790(smooth endoplasmic reticulum)|GO:0014069(postsynaptic density)|GO:0030425(dendrite)|GO:0043267(negative regulation of potassium ion transport)|GO:0051019(mitogen-activated protein kinase binding)	ACCGCAGACCAGCAACAGTAGTATGAAACTCCAGAGTGCAAACTGAAGCTGGAAGACCAT	5332	PLCB4	0
A_66_P118600	1.96842	0.000313511	Lama1	laminin, alpha 1	Mus musculus laminin, alpha 1 (Lama1), mRNA [NM_008480]	NM_008480	NM_008480	16772	chr17	68171924	68171983	+	8854	166	5	A_66_P118600	FALSE	Mm.303386	ENSMUST00000035471		ref|NM_008480|ens|ENSMUST00000035471|ref|XM_006523717|gb|M36775	chr17:068171924-068171983	mm|17qE1.1	GO:0002011(morphogenesis of an epithelial sheet)|GO:0005102(receptor binding)|GO:0005201(extracellular matrix structural constituent)|GO:0005515(protein binding)|GO:0005576(extracellular region)|GO:0005578(proteinaceous extracellular matrix)|GO:0005604(basement membrane)|GO:0005605(basal lamina)|GO:0005606(laminin-1 complex)|GO:0005608(laminin-3 complex)|GO:0005615(extracellular space)|GO:0005911…	ATGTTGAACTAAAGCCACACGGACAACAGATACCTCTATTAAATGGTTTAAAACGTCAGT	284217	LAMA1	0
A_55_P2130034	1.96829	0.0018745	Zfp599	zinc finger protein 599	Mus musculus zinc finger protein 599 (Zfp599), mRNA [NM_181419]	NM_181419	NM_181419	235048	chr9	22054111	22054052	-	31491	96	324	A_55_P2130034	FALSE	Mm.292381	ENSMUST00000086281		ref|NM_181419|ens|ENSMUST00000086281|ref|XM_011242471|gb|AK032725	chr9:022054111-022054052	mm|9qA3	GO:0003674(molecular_function)|GO:0005575(cellular_component)|GO:0008150(biological_process)	TGTGGGAAATCATTCTACCAGAAATCAAAACTCACTCTACATCAAAGAAATCATGTAGGT			0
A_51_P220150	1.96806	0.0457769	Angptl7	angiopoietin-like 7	Mus musculus angiopoietin-like 7 (Angptl7), mRNA [NM_001039554]	NM_001039554	NM_001039554	654812	chr4	147870043	147869984	-	33734	90	101	A_51_P220150	FALSE	Mm.388929	ENSMUST00000030840		ref|NM_001039554|ens|ENSMUST00000030840|ref|XM_006535965|ref|XM_006535966	chr4:147870043-147869984	mm|4qE2	GO:0005575(cellular_component)|GO:0005576(extracellular region)	TAACCCTGAGGTCACTTAACCCATTTTCCCTAACTGAGGCTTAGATGACACGAGGGAAAA	10218	ANGPTL7	0
A_51_P362538	1.9661	2.0627e-05	Syde2	synapse defective 1, Rho GTPase, homolog 2 (C. elegans)	Mus musculus synapse defective 1, Rho GTPase, homolog 2 (C. elegans) (Syde2), mRNA [NM_001166064]	NM_001166064	NM_001166064	214804	chr3	145683843	145683902	+	56252	21	2	A_51_P362538	FALSE	Mm.268854	ENSMUST00000039517		ref|NM_001166064|ens|ENSMUST00000039517|ref|XM_006501292|ref|XM_006501293	chr3:145683843-145683902	mm|3qH2	GO:0003674(molecular_function)|GO:0005575(cellular_component)|GO:0008150(biological_process)	TAGGTTTTAGAATGAGGGAAGGGGTTGGTTACAGCATTCCAAATATTTTAAAAATAAGGC	84144	SYDE2	0
A_55_P2044613	1.96604	0.0010505	Hsf4	heat shock transcription factor 4	Mus musculus heat shock transcription factor 4 (Hsf4), transcript variant 1, mRNA [NM_001256042]	NM_001256042	NM_001256042	26386	chr8	107799573	107799632	+	60102	9	174	A_55_P2044613	FALSE	Mm.89204			ref|NM_001256042|ref|NM_011939|ref|NM_001256044|ref|NR_045689	chr8:107799573-107799632	mm|8qD3	GO:0000122(negative regulation of transcription from RNA polymerase II promoter)|GO:0000977(RNA polymerase II regulatory region sequence-specific DNA binding)|GO:0001227(RNA polymerase II transcription regulatory region sequence-specific DNA binding transcription factor activity involved in negative regulation of transcription)|GO:0001228(RNA polymerase II transcription regulatory region sequence…	TGAAAAAGCCTGGCTAAGGAACTAGCACGCAACAGCACACCCCTTTAGGCTTCCTGGCGC	3299	HSF4	0
A_55_P1993168	1.96335	0.000225926	Ppargc1b	peroxisome proliferative activated receptor, gamma, coactivator 1 beta	Mus musculus peroxisome proliferative activated receptor, gamma, coactivator 1 beta (Ppargc1b), mRNA [NM_133249]	NM_133249	NM_133249	170826	chr18	61458281	61458222	-	33285	91	16	A_55_P1993168	FALSE	Mm.415302	ENSMUST00000063307		ref|NM_133249|ens|ENSMUST00000063307|ens|ENSMUST00000075299|gb|AK028464	chr18:061458281-061458222	mm|18qE1	GO:0000166(nucleotide binding)|GO:0001104(RNA polymerase II transcription cofactor activity)|GO:0001503(ossification)|GO:0003676(nucleic acid binding)|GO:0003723(RNA binding)|GO:0005515(protein binding)|GO:0005634(nucleus)|GO:0005739(mitochondrion)|GO:0006351(transcription, DNA-dependent)|GO:0006355(regulation of transcription, DNA-dependent)|GO:0006366(transcription from RNA polymerase II promot…	ATGTTTACGTTTTCAAAGAAAAGAGTATATGAGAAGGAGAGCGAGCGAGCGAGCGAGCGA	133522	PPARGC1B	0
A_55_P2110497	1.96014	0.0380339	Ddc	dopa decarboxylase	Mus musculus dopa decarboxylase (Ddc), transcript variant 1, mRNA [NM_001190448]	NM_001190448	NM_001190448	13195	chr11	11714165	11714106	-	16060	144	25	A_55_P2110497	FALSE	Mm.12906	ENSMUST00000109659		ref|NM_001190448|ref|NM_016672|ens|ENSMUST00000109659|ens|ENSMUST00000136810	chr11:011714165-011714106	mm|11qA1	GO:0003824(catalytic activity)|GO:0004058(aromatic-L-amino-acid decarboxylase activity)|GO:0005737(cytoplasm)|GO:0006520(cellular amino acid metabolic process)|GO:0008021(synaptic vesicle)|GO:0009636(response to toxin)|GO:0015842(synaptic vesicle amine transport)|GO:0016597(amino acid binding)|GO:0016829(lyase activity)|GO:0016831(carboxy-lyase activity)|GO:0019752(carboxylic acid metabolic proce…	TGGCTGTTAACTTATCCTCTGTGTGGCTAAATACTAAATAAACAACCTATGTGCAATACT	1644	DDC	0
A_51_P461779	1.95484	0.00283017	Ppp2r2c	protein phosphatase 2, regulatory subunit B, gamma	Mus musculus protein phosphatase 2, regulatory subunit B, gamma (Ppp2r2c), mRNA [NM_172994]	NM_172994	NM_172994	269643	chr5	37346000	37346059	+	31630	96	46	A_51_P461779	FALSE	Mm.41694	ENSMUST00000031003		ref|NM_172994|ens|ENSMUST00000031003|ref|XM_006503971|ref|XM_006503972	chr5:037346000-037346059	mm|5qB3	GO:0000159(protein phosphatase type 2A complex)|GO:0007165(signal transduction)|GO:0008601(protein phosphatase type 2A regulator activity)	AAGCCACAGACTTTGCCACTTTACTCTGCTTAAGTTCTCTGGTCTTGAGTACGTGGCATT	5522	PPP2R2C	0
A_55_P1983523	1.95447	0.0214261	Cd300ld	CD300 molecule-like family member d	Mus musculus CD300 molecule-like family member d (Cd300ld), mRNA [NM_145437]	NM_145437	NM_145437	217305	chr11	114843855	114843796	-	1332	188	290	A_55_P1983523	FALSE	Mm.275986	ENSMUST00000045075		ref|NM_145437|ens|ENSMUST00000045075|gb|BC019814|gb|AK028662	chr11:114843855-114843796	mm|11qE2	GO:0002376(immune system process)|GO:0005515(protein binding)|GO:0005886(plasma membrane)|GO:0016020(membrane)|GO:0016021(integral to membrane)|GO:0032675(regulation of interleukin-6 production)|GO:0032680(regulation of tumor necrosis factor production)	GTTCTAGGTCAGTCTGCTTTACAGAGTGAGTTATAGGACTACACAGAGAAATCCAAAAAA	100131439	CD300LD	0
A_55_P2121980	1.95244	0.00252426	Plcb4	phospholipase C, beta 4	Mus musculus phospholipase C, beta 4 (Plcb4), mRNA [NM_013829]	NM_013829	NM_013829	18798	chr2	135807797	135807856	+	26928	110	266	A_55_P2121980	FALSE	Mm.38009	ENSMUST00000134310		ref|NM_013829|ens|ENSMUST00000134310|ens|ENSMUST00000035646|ens|ENSMUST00000184371	chr2:135807797-135807856	mm|2qF3	GO:0004435(phosphatidylinositol phospholipase C activity)|GO:0005515(protein binding)|GO:0005634(nucleus)|GO:0005737(cytoplasm)|GO:0005790(smooth endoplasmic reticulum)|GO:0014069(postsynaptic density)|GO:0030425(dendrite)|GO:0043267(negative regulation of potassium ion transport)|GO:0051019(mitogen-activated protein kinase binding)	GAAATTTCTTTCAATCACAGAGAAGAGAGCAGACCAAATGAGAGCAATGGGCATTGAAAC	5332	PLCB4	0
A_55_P2139942	1.95168	0.0822993	Calca	calcitonin/calcitonin-related polypeptide, alpha	Mus musculus calcitonin/calcitonin-related polypeptide, alpha (Calca), transcript variant 4, mRNA [NM_001305616]	NM_001305616	NM_001305616	12310	chr7	121777007	121776948	-	39802	71	102	A_55_P2139942	FALSE	Mm.4361	ENSMUST00000032907		ref|NM_001305616|ref|NM_007587|ens|ENSMUST00000032907|gb|AK132582	chr7:121777007-121776948	mm|7qF1	GO:0001976(neurological system process involved in regulation of systemic arterial blood pressure)|GO:0001984(vasodilation of artery involved in baroreceptor response to increased systemic arterial blood pressure)|GO:0002027(regulation of heart rate)|GO:0005102(receptor binding)|GO:0005179(hormone activity)|GO:0005576(extracellular region)|GO:0005615(extracellular space)|GO:0005622(intracellular)…	AAGAATGGTATCTGAAATCCCCAGTGGGTGAGGAGAAAGTCCCACAGGCTAAAAGAGAAT	796	CALCA	0
A_51_P501069	1.94943	0.0908883	Spta1	spectrin alpha, erythrocytic 1	Mus musculus spectrin alpha, erythrocytic 1 (Spta1), mRNA [NM_011465]	NM_011465	NM_011465	20739	chr1	176176619	176176678	+	61555	5	219	A_51_P501069	FALSE	Mm.200611	ENSMUST00000156092		ref|NM_011465|ens|ENSMUST00000156092|ens|ENSMUST00000027817|gb|BC150747	chr1:176176619-176176678	mm|1qH3	GO:0002260(lymphocyte homeostasis)|GO:0003779(actin binding)|GO:0005509(calcium ion binding)|GO:0005737(cytoplasm)|GO:0005856(cytoskeleton)|GO:0006779(porphyrin-containing compound biosynthetic process)|GO:0007009(plasma membrane organization)|GO:0008091(spectrin)|GO:0008360(regulation of cell shape)|GO:0014731(spectrin-associated cytoskeleton)|GO:0016020(membrane)|GO:0030036(actin cytoskeleton o…	CACTGGAAGACTATACATCATTCCTGATTGACAAGGAGTCAGAGAATATCAAGACCAGCG	6708	SPTA1	0
A_51_P389531	1.94912	0.0143138	Prmt1	protein arginine N-methyltransferase 1	Mus musculus protein arginine N-methyltransferase 1 (Prmt1), transcript variant 1, mRNA [NM_019830]	NM_019830	NM_019830	15469	chr7	52234151	52234092	-	22286	125	37	A_51_P389531	FALSE	Mm.27545	ENSMUST00000153576		ref|NM_019830|ref|NM_001252476|ref|NR_045521|ens|ENSMUST00000153576	chr7:052234151-052234092	mm|7qB4	GO:0000179(rRNA (adenine-N6,N6-)-dimethyltransferase activity)|GO:0001701(in utero embryonic development)|GO:0003880(protein C-terminal carboxyl O-methyltransferase activity)|GO:0004809(tRNA (guanine-N2-)-methyltransferase activity)|GO:0005515(protein binding)|GO:0005634(nucleus)|GO:0005737(cytoplasm)|GO:0005829(cytosol)|GO:0006355(regulation of transcription, DNA-dependent)|GO:0006479(protein me…	ACGTGTATGGCTTTGATATGTCCTGCATTAAAGACGTGGCCATCAAGGAGCCCCTGGTGG	3276	PRMT1	0
A_51_P171772	1.94768	0.0165642	Bcl11b	B cell leukemia/lymphoma 11B	Mus musculus B cell leukemia/lymphoma 11B (Bcl11b), transcript variant 2, mRNA [NM_021399]	NM_021399	NM_021399	58208	chr12	109153906	109153847	-	54259	27	52	A_51_P171772	FALSE	Mm.392694	ENSMUST00000109891		ref|NM_021399|ref|NM_001079883|ref|NM_001286343|ens|ENSMUST00000109891	chr12:109153906-109153847	mm|12qF1	GO:0000978(RNA polymerase II core promoter proximal region sequence-specific DNA binding)|GO:0001077(RNA polymerase II core promoter proximal region sequence-specific DNA binding transcription factor activity involved in positive regulation of transcription)|GO:0003334(keratinocyte development)|GO:0003382(epithelial cell morphogenesis)|GO:0003676(nucleic acid binding)|GO:0005515(protein binding)|…	ACATGTGAGTACTGCGGCAAGGTCTTCAAGAACTGTAGCAACCTGACGGTGCACCGGAAG	64919	BCL11B	0
A_55_P2079713	1.94762	0.00135407	Gramd1c	GRAM domain containing 1C	Mus musculus GRAM domain containing 1C (Gramd1c), transcript variant 1, mRNA [NM_153528]	NM_153528	NM_153528	207798	chr16	43980796	43980737	-	52269	33	96	A_55_P2079713	FALSE	Mm.19316	ENSMUST00000114677		ref|NM_153528|ref|NM_001172107|ens|ENSMUST00000114677|ens|ENSMUST00000036174	chr16:043980796-043980737	mm|16qB4	GO:0003674(molecular_function)|GO:0005575(cellular_component)|GO:0008150(biological_process)|GO:0016020(membrane)|GO:0016021(integral to membrane)	GGCTTCGGAGTAATACCTTCTGTTCTGTTCTGTTCTGTTCTGCTTTGTTTTGTTCTGTTC	54762	GRAMD1C	0
A_51_P508485	1.94702	0.00620265	Tmtc4	transmembrane and tetratricopeptide repeat containing 4	Mus musculus transmembrane and tetratricopeptide repeat containing 4 (Tmtc4), mRNA [NM_028651]	NM_028651	NM_028651	70551	chr14	123318495	123318436	-	36535	81	76	A_51_P508485	FALSE	Mm.271988	ENSMUST00000143189		ref|NM_028651|ens|ENSMUST00000143189|ens|ENSMUST00000037726|ref|XM_006519510	chr14:123318495-123318436	mm|14qE5	GO:0003674(molecular_function)|GO:0005575(cellular_component)|GO:0008150(biological_process)|GO:0016020(membrane)|GO:0016021(integral to membrane)	TCAGAGGGCTACCTGTGTGTATATGCTGTGTTTTCATGTTTTAGTTGTAAAGTGGGTTTC	84899	TMTC4	0
A_55_P2079388	1.94573	0.000351665	Snora74a	small nucleolar RNA, H/ACA box 74A	Mus musculus small nucleolar RNA, H/ACA box 74A (Snora74a), small nucleolar RNA [NR_002905]	NR_002905	NR_002905	436583	chr18	35716820	35716879	+	17034	141	45	A_55_P2079388	FALSE	Mm.482118			ref|NR_002905|gb|X94291|gb|AK088959|riken|E430033M06	chr18:35716820-35716879	mm|18qB2	GO:0003674(molecular_function)|GO:0005575(cellular_component)|GO:0008150(biological_process)	ATTGCATCCCTGAGAGTGGAATGACTCCTTGTGGAGTTGGTCCTGGTCTGGGTGCAAACA			0
A_51_P157462	1.94061	0.0018745	Rgn	regucalcin	Mus musculus regucalcin (Rgn), mRNA [NM_009060]	NM_009060	NM_009060	19733	chrX	20138932	20138991	+	40157	70	48	A_51_P157462	FALSE	Mm.2118	ENSMUST00000023832		ref|NM_009060|ens|ENSMUST00000023832|ref|XM_006527572|gb|U28937	chrX:020138932-020138991	mm|XqA1.3	GO:0001933(negative regulation of protein phosphorylation)|GO:0004341(gluconolactonase activity)|GO:0005509(calcium ion binding)|GO:0005634(nucleus)|GO:0005654(nucleoplasm)|GO:0005737(cytoplasm)|GO:0005829(cytosol)|GO:0006469(negative regulation of protein kinase activity)|GO:0006874(cellular calcium ion homeostasis)|GO:0007283(spermatogenesis)|GO:0008270(zinc ion binding)|GO:0010867(positive reg…	AGTTCAACTATCAATCAGCCTGATGATGGCAAATTGCTCTGGGGGTTGAAATGGGACTGT	9104	RGN	0
A_66_P139196	1.93976	0.00153832	Baz1a	bromodomain adjacent to zinc finger domain 1A	Mus musculus bromodomain adjacent to zinc finger domain 1A (Baz1a), mRNA [NM_013815]	NM_013815	NM_013815	217578	chr12	55994057	55993998	-	2063	186	140	A_66_P139196	FALSE	Mm.479583	ENSMUST00000038926		ref|NM_013815|ens|ENSMUST00000038926|ref|XM_006515671|ref|XM_006515670	chr12:055994057-055993998	mm|12qC1	GO:0000228(nuclear chromosome)|GO:0005515(protein binding)|GO:0005634(nucleus)|GO:0006261(DNA-dependent DNA replication)|GO:0006338(chromatin remodeling)|GO:0006351(transcription, DNA-dependent)|GO:0006355(regulation of transcription, DNA-dependent)|GO:0008270(zinc ion binding)|GO:0008623(chromatin accessibility complex)|GO:0046872(metal ion binding)	GCAGATAGATATCTGGGTTTGAGGCAAGCATCGTCTACAGTCAATTCTGGACATTGAGGG	11177	BAZ1A	0
A_52_P673499	1.9396	0.000221197	Shmt1	serine hydroxymethyltransferase 1 (soluble)	Mus musculus serine hydroxymethyltransferase 1 (soluble) (Shmt1), mRNA [NM_009171]	NM_009171	NM_009171	20425	chr11	60603158	60603099	-	43181	61	231	A_52_P673499	FALSE	Mm.364956	ENSMUST00000135081		ref|NM_009171|ens|ENSMUST00000135081|ens|ENSMUST00000172804|ens|ENSMUST00000174174	chr11:060603158-060603099	mm|11qB2	GO:0003824(catalytic activity)|GO:0004372(glycine hydroxymethyltransferase activity)|GO:0005634(nucleus)|GO:0005654(nucleoplasm)|GO:0005737(cytoplasm)|GO:0005739(mitochondrion)|GO:0005829(cytosol)|GO:0006544(glycine metabolic process)|GO:0006545(glycine biosynthetic process)|GO:0006563(L-serine metabolic process)|GO:0006565(L-serine catabolic process)|GO:0006730(one-carbon metabolic process)|GO:0…	TTGACATCCCGAGGACTTTTGGAAGAAGACTTCCAAAAAGTAGCACACTTTATCCACAGG	6470	SHMT1	0
A_52_P531731	1.93955	0.000229141	Grin3a	glutamate receptor ionotropic, NMDA3A	Mus musculus glutamate receptor ionotropic, NMDA3A (Grin3a), transcript variant 1, mRNA [NM_001276355]	NM_001276355	NM_001276355	242443	chr4	49674747	49674688	-	14247	149	44	A_52_P531731	FALSE	Mm.440095	ENSMUST00000093859		ref|NM_001276355|ref|NM_001033351|ens|ENSMUST00000093859|ens|ENSMUST00000076674	chr4:049674747-049674688	mm|4qB1	GO:0004970(ionotropic glutamate receptor activity)|GO:0004972(N-methyl-D-aspartate selective glutamate receptor activity)|GO:0005234(extracellular-glutamate-gated ion channel activity)|GO:0005262(calcium channel activity)|GO:0005515(protein binding)|GO:0005886(plasma membrane)|GO:0006816(calcium ion transport)|GO:0016020(membrane)|GO:0016358(dendrite development)|GO:0016594(glycine binding)|GO:00…	AGCTGCCAGTCATTTTATGAAAATGAAGTGCTTCTAAGTATTTCCTTAAGGTCTGTGAAG	116443	GRIN3A	0
A_55_P2089913	1.93879	0.00343583	Cd6	CD6 antigen	Mus musculus CD6 antigen (Cd6), transcript variant 2, mRNA [NM_009852]	NM_009852	NM_009852	12511	chr19	10863888	10863829	-	34151	88	252	A_55_P2089913	FALSE	Mm.290897	ENSMUST00000080292		ref|NM_009852|ref|NM_001037801|ens|ENSMUST00000080292|ref|XM_006526622	chr19:010863888-010863829	mm|19qA	GO:0001934(positive regulation of protein phosphorylation)|GO:0001948(glycoprotein binding)|GO:0005044(scavenger receptor activity)|GO:0005515(protein binding)|GO:0005886(plasma membrane)|GO:0007155(cell adhesion)|GO:0016020(membrane)|GO:0016021(integral to membrane)|GO:0019901(protein kinase binding)|GO:0044214(fully spanning plasma membrane)	AGCCAGGCTACAGTGGCCTGTCCTGAGTTCCAGAGATTAAACGATTACTGAGTGAAAACT	923	CD6	0
A_55_P1955412	1.93777	0.00870241	Slc1a2	solute carrier family 1 (glial high affinity glutamate transporter), member 2	Mus musculus solute carrier family 1 (glial high affinity glutamate transporter), member 2 (Slc1a2), transcript variant 3, mRNA [NM_011393]	NM_011393	NM_011393	20511	chr2	102617752	102617811	+	10474	161	45	A_55_P1955412	FALSE	Mm.267547	ENSMUST00000154446		ref|NM_011393|ens|ENSMUST00000154446|ens|ENSMUST00000111212|ens|ENSMUST00000111213	chr2:102617752-102617811	mm|2qE2	GO:0005313(L-glutamate transmembrane transporter activity)|GO:0005314(high-affinity glutamate transmembrane transporter activity)|GO:0005886(plasma membrane)|GO:0005887(integral to plasma membrane)|GO:0006810(transport)|GO:0006835(dicarboxylic acid transport)|GO:0007399(nervous system development)|GO:0007632(visual behavior)|GO:0009416(response to light stimulus)|GO:0009611(response to wounding)|…	AAGCAACTCTAATCAGTGTGTCTATGCCGCACACAACTCTGTCGTAATAGATGAGTGCAA	6506	SLC1A2	0
A_55_P2093023	1.93639	0.0246632	Xrcc6bp1	XRCC6 binding protein 1	Mus musculus XRCC6 binding protein 1 (Xrcc6bp1), transcript variant 2, mRNA [NM_026858]	NM_026858	NM_026858	68876	chr10	126305548	126305489	-	8859	165	324	A_55_P2093023	FALSE	Mm.276769	ENSMUST00000026504		ref|NM_026858|ens|ENSMUST00000026504|gb|AK010471|gb|BC030630	chr10:126305548-126305489	mm|10qD3	GO:0003674(molecular_function)|GO:0004222(metalloendopeptidase activity)|GO:0005575(cellular_component)|GO:0006508(proteolysis)|GO:0008150(biological_process)|GO:0008233(peptidase activity)|GO:0008237(metallopeptidase activity)|GO:0016787(hydrolase activity)|GO:0046872(metal ion binding)	GGGTCAGAAGAATGGTGAATCTAAGCAAAAAGGCAGTATTCTAATAAACAAAGCATACAC	91419	ATP23	0
A_51_P341349	1.93434	6.37922e-05	Mtap	methylthioadenosine phosphorylase	Mus musculus methylthioadenosine phosphorylase (Mtap), mRNA [NM_024433]	NM_024433	NM_024433	66902	chr4	88826213	88826272	+	46902	50	5	A_51_P341349	FALSE	Mm.28500	ENSMUST00000058030		ref|NM_024433|ens|ENSMUST00000058030|gb|AK167319|gb|AK005064	chr4:088826213-088826272	mm|4qC4	GO:0003824(catalytic activity)|GO:0004645(phosphorylase activity)|GO:0005634(nucleus)|GO:0005737(cytoplasm)|GO:0006166(purine ribonucleoside salvage)|GO:0009116(nucleoside metabolic process)|GO:0016740(transferase activity)|GO:0016757(transferase activity, transferring glycosyl groups)|GO:0016763(transferase activity, transferring pentosyl groups)|GO:0017061(S-methyl-5-thioadenosine phosphorylase…	GCCGGTGTTTAATGCAAGCCAGTGTGACTCATCACAGTGTATCGAGAGTTGACACATAAT	4507	MTAP	0
A_55_P2024953	1.93332	4.12544e-05	Tbc1d4	TBC1 domain family, member 4	Mus musculus TBC1 domain family, member 4 (Tbc1d4), mRNA [NM_001081278]	NM_001081278	NM_001081278	210789	chr14	101841636	101841577	-	50000	40	42	A_55_P2024953	FALSE	Mm.320639	ENSMUST00000161991		ref|NM_001081278|ens|ENSMUST00000161991	chr14:101841636-101841577	mm|14qE2.3	GO:0005096(GTPase activator activity)|GO:0005515(protein binding)|GO:0005737(cytoplasm)|GO:0016192(vesicle-mediated transport)|GO:0031339(negative regulation of vesicle fusion)|GO:0031988(membrane-bounded vesicle)|GO:0032869(cellular response to insulin stimulus)|GO:0070062(extracellular vesicular exosome)	CCATCAGGTTCCTGTAACGTCTAGAATTATTTCCAATAAATATGTTGCTGCCATTTCCTG	9882	TBC1D4	0
A_55_P2008634	1.92427	0.00766447	Pcdhb10	protocadherin beta 10	Mus musculus protocadherin beta 10 (Pcdhb10), mRNA [NM_053135]	NM_053135	NM_053135	93881	chr18	37574021	37574080	+	4316	179	226	A_55_P2008634	FALSE	Mm.115996	ENSMUST00000051126		ref|NM_053135|ens|ENSMUST00000051126|gb|BB193803	chr18:037574021-037574080	mm|18qB3	GO:0003674(molecular_function)	GTATGCATGTCCTCCATTACCAAAGTGTTTACTTAGTTCACAATATCCACTGTACTTAAT	26167	PCDHB5	0
A_55_P2033725	1.924	0.0115486	Ascl2	achaete-scute complex homolog 2 (Drosophila)	Mus musculus achaete-scute complex homolog 2 (Drosophila) (Ascl2), mRNA [NM_008554]	NM_008554	NM_008554	17173	chr7	150152793	150152734	-	30163	101	27	A_55_P2033725	FALSE	Mm.196417	ENSMUST00000121862		ref|NM_008554|ens|ENSMUST00000121862|ens|ENSMUST00000009392|ref|XM_011241984	chr7:150152793-150152734	mm|7qF5	GO:0000122(negative regulation of transcription from RNA polymerase II promoter)|GO:0000978(RNA polymerase II core promoter proximal region sequence-specific DNA binding)|GO:0001078(RNA polymerase II core promoter proximal region sequence-specific DNA binding transcription factor activity involved in negative regulation of transcription)|GO:0001701(in utero embryonic development)|GO:0001890(place…	GGCCAGTGTGGGAACCCTGCTGTTGCAAAGTGTACTATTCTATAAAAGTTGTTTTTCATT	430	ASCL2	0
A_51_P322473	1.92274	0.0289551	Perm1	PPARGC1 and ESRR induced regulator, muscle 1	Mus musculus PPARGC1 and ESRR induced regulator, muscle 1 (Perm1), mRNA [NM_172417]	NM_172417	NM_172417	74183	chr4	155595141	155595200	+	15707	145	75	A_51_P322473	FALSE	Mm.431343	ENSMUST00000105572		ref|NM_172417|ens|ENSMUST00000105572|ref|XM_006539211|ref|XM_006539212	chr4:155595141-155595200	mm|4qE2	GO:0003674(molecular_function)|GO:0005634(nucleus)|GO:0005737(cytoplasm)|GO:0006351(transcription, DNA-dependent)|GO:0006355(regulation of transcription, DNA-dependent)|GO:0014850(response to muscle activity)	AGGGTTGGATATTCTCCAAGAGCCCCGGACAGGATATCCATAGAATGTAATAGCATCCTA	84808	PERM1	0
A_51_P379478	1.91872	0.0017191	Nckap5	NCK-associated protein 5	Mus musculus NCK-associated protein 5 (Nckap5), transcript variant 2, mRNA [NM_172484]	NM_172484	NM_172484	210356	chr1	127810468	127810409	-	39091	73	212	A_51_P379478	FALSE	Mm.377234	ENSMUST00000112583		ref|NM_172484|ref|NM_001081756|ref|NM_176957|ens|ENSMUST00000112583	chr1:127810468-127810409	mm|1qE3	GO:0003674(molecular_function)|GO:0005575(cellular_component)|GO:0008150(biological_process)	TTTATAATTCCTTCTGTACAGAAGCCTACAGACCAGGCAGACTAGAGCTATGTTTAGGAT	344148	NCKAP5	0
A_52_P532355	1.91764	0.000973325	Lin28b	lin-28 homolog B (C. elegans)	Mus musculus lin-28 homolog B (C. elegans) (Lin28b), mRNA [NM_001031772]	NM_001031772	NM_001031772	380669	chr10	45140471	45140412	-	15430	145	302	A_52_P532355	FALSE	Mm.440328	ENSMUST00000079390		ref|NM_001031772|ens|ENSMUST00000079390|ref|XM_011243186|ref|XM_011243181	chr10:045140471-045140412	mm|10qB2	GO:0003676(nucleic acid binding)|GO:0003677(DNA binding)|GO:0003723(RNA binding)|GO:0005634(nucleus)|GO:0005654(nucleoplasm)|GO:0005730(nucleolus)|GO:0005737(cytoplasm)|GO:0005739(mitochondrion)|GO:0006355(regulation of transcription, DNA-dependent)|GO:0008270(zinc ion binding)|GO:0010587(miRNA catabolic process)|GO:0016235(aggresome)|GO:0031047(gene silencing by RNA)|GO:0031054(pre-miRNA process…	AGCCAGTGGAATTTACATTTAAAAAATCCCCCAAAGGCCTTGAGTCAATACGGGTAACAG	389421	LIN28B	0
A_55_P2057321	1.91763	0.000652753	Myh7b	myosin, heavy chain 7B, cardiac muscle, beta	Mus musculus myosin, heavy chain 7B, cardiac muscle, beta (Myh7b), mRNA [NM_001085378]	NM_001085378	NM_001085378	668940	chr2	155459122	155459181	+	52568	32	154	A_55_P2057321	FALSE	Mm.469980	ENSMUST00000092995		ref|NM_001085378|ref|XM_006500047|ens|ENSMUST00000092995|tc|TC1658430	chr2:155459122-155459181	mm|2qH1	GO:0000166(nucleotide binding)|GO:0003774(motor activity)|GO:0003779(actin binding)|GO:0005524(ATP binding)|GO:0016020(membrane)|GO:0016459(myosin complex)|GO:0032982(myosin filament)	CAGGACCTGGTGGACAAGCTGCAGAGCAAGGTCAAGAGCTACAAGCGTCAGTTTGAGGAG	57644	MYH7B	0
A_55_P2028804	1.91753	3.88098e-05	Uchl3	ubiquitin carboxyl-terminal esterase L3 (ubiquitin thiolesterase)	Mus musculus ubiquitin carboxyl-terminal esterase L3 (ubiquitin thiolesterase) (Uchl3), mRNA [NM_016723]	NM_016723	NM_016723	50933	chr14	102095276	102095335	+	41132	67	66	A_55_P2028804	FALSE	Mm.275970	ENSMUST00000002289		ref|NM_016723|ens|ENSMUST00000002289|ref|XM_006519246|ref|XM_006519247	chr14:102095276-102095335	mm|14qE2.3	GO:0004843(ubiquitin-specific protease activity)|GO:0005622(intracellular)|GO:0005634(nucleus)|GO:0005654(nucleoplasm)|GO:0005737(cytoplasm)|GO:0006508(proteolysis)|GO:0006511(ubiquitin-dependent protein catabolic process)|GO:0007628(adult walking behavior)|GO:0008233(peptidase activity)|GO:0008234(cysteine-type peptidase activity)|GO:0016579(protein deubiquitination)|GO:0016787(hydrolase activit…	AATTTTTAATATTTTCATTAACTTGACTAATTAAACTTTATGTGAATAAACTTTGACTCT	7347	UCHL3	0
A_55_P2300913	1.91033	0.00810199	D130095D21Rik	RIKEN cDNA D130095D21 gene	Mus musculus 12 days embryo spinal ganglion cDNA, RIKEN full-length enriched library, clone:D130095D21 product:unclassifiable, full insert sequence. [AK084110]		AK084110	402775	chr12	79350742	79350801	+	26890	111	13	A_55_P2300913	FALSE	Mm.450482			gb|AK084110|gb|BB174519|riken|D130095D21	chr12:79350742-79350801	mm|12qC3		AGAAGTTACTATTGGATCAGAGTTTCAAAAGGTAATCTCACCTGTAGAGTAAAATGTCCA			0
A_55_P2006499	1.90921	0.147262	Esrrg	estrogen-related receptor gamma	Mus musculus estrogen-related receptor gamma (Esrrg), transcript variant 2, mRNA [NM_001243792]	NM_001243792	NM_001243792	26381	chr1	190038192	190038251	+	43702	59	174	A_55_P2006499	FALSE	Mm.89989	ENSMUST00000110938		ref|NM_001243792|ref|NM_011935|ens|ENSMUST00000110938|ens|ENSMUST00000110939	chr1:190038192-190038251	mm|1qH6	GO:0000977(RNA polymerase II regulatory region sequence-specific DNA binding)|GO:0001228(RNA polymerase II transcription regulatory region sequence-specific DNA binding transcription factor activity involved in positive regulation of transcription)|GO:0003677(DNA binding)|GO:0003700(sequence-specific DNA binding transcription factor activity)|GO:0003707(steroid hormone receptor activity)|GO:00037…	CTTGTAGTGACTCTCGTGTTTTAATCAAGCCAGATTGTTGTATTTATTCCACTATTTTGC	2104	ESRRG	0
A_55_P2319468	1.90906	0.0104006	9430076C15Rik	RIKEN cDNA 9430076C15 gene	Mus musculus RIKEN cDNA 9430076C15 gene (9430076C15Rik), long non-coding RNA [NR_015553]	NR_015553	NR_015553	320189	chr6	53347149	53347208	+	33168	91	250	A_55_P2319468	FALSE	Mm.227444			ref|NR_015553|gb|AK051275|tc|TC1594359|riken|D130027L12	chr6:53347149-53347208	mm|6qB3	GO:0003674(molecular_function)|GO:0005575(cellular_component)|GO:0008150(biological_process)	ATGAGCCTGGGCATGAACTCTGGAGATGTGATGTGGTCTACTGTCTGGATTCTTTATGAA			0
A_55_P2000304	1.90874	0.000205703	Terf1	telomeric repeat binding factor 1	Mus musculus telomeric repeat binding factor 1 (Terf1), transcript variant 1, mRNA [NM_009352]	NM_009352	NM_009352	21749	chr1	15833432	15833491	+	52426	33	109	A_55_P2000304	FALSE	Mm.4306	ENSMUST00000027057		ref|NM_009352|ref|NM_001286628|ens|ENSMUST00000027057|ens|ENSMUST00000188371	chr1:015833432-015833491	mm|1qA3	GO:0000723(telomere maintenance)|GO:0000781(chromosome, telomeric region)|GO:0000783(nuclear telomere cap complex)|GO:0000784(nuclear chromosome, telomeric region)|GO:0003677(DNA binding)|GO:0003682(chromatin binding)|GO:0003691(double-stranded telomeric DNA binding)|GO:0005515(protein binding)|GO:0005634(nucleus)|GO:0005694(chromosome)|GO:0005730(nucleolus)|GO:0005737(cytoplasm)|GO:0005819(spind…	CCCTACCAAATTCAGTACCCCATCCCATATTCTGTTTTAATACAAAAGAGTCTAATAAGA	7013	TERF1	0
A_55_P1957983	1.90863	0.0287809	Tmem30c	transmembrane protein 30C	Mus musculus transmembrane protein 30C (Tmem30c), mRNA [NM_027651]	NM_027651	NM_027651	71027	chr16	57266582	57266523	-	57101	18	272	A_55_P1957983	FALSE	Mm.158563	ENSMUST00000023434		ref|NM_027651|ens|ENSMUST00000023434|ens|ENSMUST00000119407|ref|XM_011246013	chr16:057266582-057266523	mm|16qC1.1	GO:0003674(molecular_function)|GO:0005575(cellular_component)|GO:0008150(biological_process)|GO:0016020(membrane)|GO:0016021(integral to membrane)	TCTTTTGCCATCCTGACGATTCACTTGATGCTGAAAAGGAGTAAACTGAATTTCCTGTAG			0
A_55_P2294074	1.90774	0.0354925	AA536887	expressed sequence AA536887	AGENCOURT_11258496 NIH_MGC_135 Mus musculus cDNA clone IMAGE:30135500 5', mRNA sequence [CB196702]		CB196702	101458	chr7	144478538	144478479	-	9220	164	258	A_55_P2294074	FALSE	Mm.441567			gb|CB196702|tc|TC1659663	chr7:144478538-144478479	mm|7qF4		ATCAAGTAATCCTGATTAGCAATCTCACTGTACCCAGTCAAGAGTGAAATGCAGCCCAGC			0
A_51_P365019	1.90758	0.00172298	Gclc	glutamate-cysteine ligase, catalytic subunit	Mus musculus glutamate-cysteine ligase, catalytic subunit (Gclc), mRNA [NM_010295]	NM_010295	NM_010295	14629	chr9	77641296	77641355	+	5326	176	174	A_51_P365019	FALSE	Mm.89888	ENSMUST00000034905		ref|NM_010295|ens|ENSMUST00000034905|ref|XM_006510812|gb|AK144339	chr9:077641296-077641355	mm|9qE1	GO:0000166(nucleotide binding)|GO:0000287(magnesium ion binding)|GO:0004357(glutamate-cysteine ligase activity)|GO:0005524(ATP binding)|GO:0005829(cytosol)|GO:0006534(cysteine metabolic process)|GO:0006536(glutamate metabolic process)|GO:0006749(glutathione metabolic process)|GO:0006750(glutathione biosynthetic process)|GO:0006979(response to oxidative stress)|GO:0008637(apoptotic mitochondrial c…	AGTGAACTGGCTTGTACATTTTGAATTCTTACTCTGGAGCAACTACTGTCTAAGCAGTTT	2729	GCLC	0
A_55_P2008417	1.90749	0.000457193	Mnd1	meiotic nuclear divisions 1 homolog (S. cerevisiae)	Mus musculus meiotic nuclear divisions 1 homolog (S. cerevisiae) (Mnd1), mRNA [NM_029797]	NM_029797	NM_029797	76915	chr3	83891936	83891877	-	16727	142	3	A_55_P2008417	FALSE	Mm.274829	ENSMUST00000047368		ref|NM_029797|ref|NR_030680|ens|ENSMUST00000047368|ref|XM_011240279	chr3:083891936-083891877	mm|3qF1	GO:0003677(DNA binding)|GO:0005515(protein binding)|GO:0005634(nucleus)|GO:0006310(DNA recombination)|GO:0051321(meiotic cell cycle)	CAGCTAACTAATGTTACCCAGTTATCATCTATCTGCTAATTGTTTACCGTTTTGAAGCTT	84057	MND1	0
A_51_P186053	1.90608	3.71251e-05	Rrp15	ribosomal RNA processing 15 homolog (S. cerevisiae)	Mus musculus ribosomal RNA processing 15 homolog (S. cerevisiae) (Rrp15), mRNA [NM_026041]	NM_026041	NM_026041	67223	chr1	188545084	188545025	-	24800	117	257	A_51_P186053	FALSE	Mm.289841	ENSMUST00000162336		ref|NM_026041|ens|ENSMUST00000162336|ens|ENSMUST00000001339|gb|AK029287	chr1:188545084-188545025	mm|1qH5	GO:0003674(molecular_function)|GO:0005634(nucleus)|GO:0005730(nucleolus)|GO:0005739(mitochondrion)|GO:0008150(biological_process)	TTTTTTCTTGAGCAGTAAACTGCAATTTTCTAGGATCCTTTGCTGTGGACACATGCCCAT	51018	RRP15	0
A_52_P343298	1.90406	0.000103099	Homer2	homer homolog 2 (Drosophila)	Mus musculus homer homolog 2 (Drosophila) (Homer2), transcript variant 1, mRNA [NM_011983]	NM_011983	NM_011983	26557	chr7	88747222	88747163	-	49482	42	93	A_52_P343298	FALSE	Mm.228	ENSMUST00000026922		ref|NM_011983|ref|NM_001164087|ref|NM_001164086|ens|ENSMUST00000026922	chr7:088747222-088747163	mm|7qD3	GO:0003779(actin binding)|GO:0005515(protein binding)|GO:0005634(nucleus)|GO:0005654(nucleoplasm)|GO:0005730(nucleolus)|GO:0005737(cytoplasm)|GO:0005886(plasma membrane)|GO:0007216(G-protein coupled glutamate receptor signaling pathway)|GO:0008277(regulation of G-protein coupled receptor protein signaling pathway)|GO:0016020(membrane)|GO:0019904(protein domain specific binding)|GO:0030054(cell ju…	TGTGTCCAGCCAGTCACTGATTCTTTTTATCCTAATCCTTTTGGTCTGAATTTCATTTGC	9455	HOMER2	0
A_55_P1963547	1.90238	0.241509	Prdm16	PR domain containing 16	Mus musculus PR domain containing 16 (Prdm16), transcript variant 1, mRNA [NM_027504]	NM_027504	NM_027504	70673	chr4	153690313	153690254	-	52918	31	110	A_55_P1963547	FALSE	Mm.257785			ref|NM_027504|ref|NM_001291026|ref|NM_001291029|ref|NM_001177995	chr4:153690313-153690254	mm|4qE2	GO:0000122(negative regulation of transcription from RNA polymerase II promoter)|GO:0003676(nucleic acid binding)|GO:0003677(DNA binding)|GO:0003713(transcription coactivator activity)|GO:0005515(protein binding)|GO:0005634(nucleus)|GO:0006351(transcription, DNA-dependent)|GO:0006355(regulation of transcription, DNA-dependent)|GO:0017053(transcriptional repressor complex)|GO:0019827(stem cell mai…	CTGGATACCAAATGTAATCTTTCCGATGCTACAATGAATTTATACACGAGATTGATATGC	63976	PRDM16	0
A_51_P519301	1.90151	0.000201659	Il17f	interleukin 17F	Mus musculus interleukin 17F (Il17f), mRNA [NM_145856]	NM_145856	NM_145856	257630	chr1	20769419	20768074	-	33840	89	218	A_51_P519301	FALSE	Mm.222807	ENSMUST00000189301		ref|NM_145856|ens|ENSMUST00000189301|ens|ENSMUST00000191111|ens|ENSMUST00000039046	unmapped		GO:0005125(cytokine activity)|GO:0005126(cytokine receptor binding)|GO:0005576(extracellular region)|GO:0005615(extracellular space)|GO:0006029(proteoglycan metabolic process)|GO:0006954(inflammatory response)|GO:0016525(negative regulation of angiogenesis)|GO:0017015(regulation of transforming growth factor beta receptor signaling pathway)|GO:0019955(cytokine binding)|GO:0042089(cytokine biosynt…	TGTCCCACGTGAATTCCAGAACCGCTCCAGTTCCCCATGGGATTACAACATCACTCGAGA	112744	IL17F	0
A_51_P356055	1.90112	0.000368762	Grp	gastrin releasing peptide	Mus musculus gastrin releasing peptide (Grp), mRNA [NM_175012]	NM_175012	NM_175012	225642	chr18	66046107	66046166	+	52784	32	49	A_51_P356055	FALSE	Mm.20298	ENSMUST00000025395		ref|NM_175012|ens|ENSMUST00000025395|ens|ENSMUST00000173985|ref|XM_006525886	chr18:066046107-066046166	mm|18qE1	GO:0005184(neuropeptide hormone activity)|GO:0005576(extracellular region)|GO:0005615(extracellular space)|GO:0007218(neuropeptide signaling pathway)	ACTTGTTTCTGTGAACCACTCACTACTTAGAAAGAGCTTTCCAATGAACGCTTTTTCCAG	2922	GRP	0
A_51_P296905	1.89986	0.000338644	Ppat	phosphoribosyl pyrophosphate amidotransferase	Mus musculus phosphoribosyl pyrophosphate amidotransferase (Ppat), mRNA [NM_172146]	NM_172146	NM_172146	231327	chr5	77342685	77342626	-	58545	14	8	A_51_P296905	FALSE	Mm.202337	ENSMUST00000155272		ref|NM_172146|ens|ENSMUST00000155272|gb|AK017664|gb|AK148034	chr5:077342685-077342626	mm|5qC3.3	GO:0004044(amidophosphoribosyltransferase activity)|GO:0006543(glutamine catabolic process)|GO:0009168(purine ribonucleoside monophosphate biosynthetic process)|GO:0019693(ribose phosphate metabolic process)|GO:0051289(protein homotetramerization)	ACACAGAAACTCAGGGAAGGTTCTACAACCAAAATCTCTAATTTGACTTTTGTGTTTTTC	5471	PPAT	0
A_51_P148744	1.89944	0.000269094	Msantd1	Myb/SANT-like DNA-binding domain containing 1	Mus musculus Myb/SANT-like DNA-binding domain containing 1 (Msantd1), mRNA [NM_207277]	NM_207277	NM_207277	403174	chr5	35266364	35266423	+	54569	26	88	A_51_P148744	FALSE	Mm.291225	ENSMUST00000050535		ref|NM_207277|ens|ENSMUST00000050535|ref|XM_011240753|ref|XM_006504012	chr5:035266364-035266423	mm|5qB2	GO:0003674(molecular_function)|GO:0005575(cellular_component)|GO:0008150(biological_process)	CCCCATCTCCAGCATTAATCTAGGGACTCCAAGACGACAGGTAGTGAGAAGGTCCCAGAA	345222	MSANTD1	0
A_55_P2022743	1.89788	4.53127e-05	Tenm3	teneurin transmembrane protein 3	Mus musculus teneurin transmembrane protein 3 (Tenm3), transcript variant 2, mRNA [NM_001145937]	NM_001145937	NM_001145937	23965	chr8	49480892	49480833	-	9434	164	157	A_55_P2022743	FALSE	Mm.42191	ENSMUST00000033965		ref|NM_001145937|ref|NM_011857|ens|ENSMUST00000033965|ens|ENSMUST00000190840	chr8:049480892-049480833	mm|8qB1.2	GO:0005887(integral to plasma membrane)|GO:0007155(cell adhesion)|GO:0007156(homophilic cell adhesion)|GO:0007165(signal transduction)|GO:0010976(positive regulation of neuron projection development)|GO:0016020(membrane)|GO:0016021(integral to membrane)|GO:0030154(cell differentiation)|GO:0042803(protein homodimerization activity)|GO:0042995(cell projection)|GO:0046982(protein heterodimerization …	TTTAAATTCAAGAAGTCTTCAAAGTACTGCAGCTGGAGGTGCACCGCACTGTGTGCTGTA	55714	TENM3	0
A_55_P2166592	1.897	0.000335928	Srrm2	serine/arginine repetitive matrix 2	Mus musculus serine/arginine repetitive matrix 2 (Srrm2), mRNA [NM_175229]	NM_175229	NM_175229	75956	chr17	23961024	23961083	+	46615	50	252	A_55_P2166592	FALSE	Mm.5222	ENSMUST00000190568		ref|NM_175229|ens|ENSMUST00000190568|ens|ENSMUST00000190686|ens|ENSMUST00000088621	chr17:023961024-023961083	mm|17qA3.3	GO:0005634(nucleus)|GO:0005681(spliceosomal complex)|GO:0006397(mRNA processing)|GO:0008150(biological_process)|GO:0008380(RNA splicing)	ACTCTCCTGGTCACAAGAGGAAGGAGACACCTAGTCCCCGTTCTAATCGTCACCGCTCCT	23524	SRRM2	0
A_52_P39157	1.89411	8.2691e-05	Bmi1	Bmi1 polycomb ring finger oncogene	Mus musculus Bmi1 polycomb ring finger oncogene (Bmi1), mRNA [NM_007552]	NM_007552	NM_007552	12151	chr2	18607987	18608046	+	21372	127	226	A_52_P39157	FALSE	Mm.289584	ENSMUST00000028071		ref|NM_007552|ens|ENSMUST00000028071|ref|XM_006497312|ref|XM_011238945	chr2:018607987-018608046	mm|2qA3	GO:0000122(negative regulation of transcription from RNA polymerase II promoter)|GO:0000151(ubiquitin ligase complex)|GO:0000792(heterochromatin)|GO:0001501(skeletal system development)|GO:0001701(in utero embryonic development)|GO:0003682(chromatin binding)|GO:0005515(protein binding)|GO:0005634(nucleus)|GO:0005737(cytoplasm)|GO:0006306(DNA methylation)|GO:0006351(transcription, DNA-dependent)|G…	TGGTGAATTTAACTCATTTTTCTAGACTTTTCTCGAGGTTTTCATGGTGTTACCTAAGAC	648	BMI1	0
A_55_P2243828	1.89394	0.0320912	LOC552901	uncharacterized LOC552901	Mus musculus 16 days neonate cerebellum cDNA, RIKEN full-length enriched library, clone:9630008J17 product:unclassifiable, full insert sequence. [AK035826]		AK035826	552901	chr6	141250879	141250938	+	26999	110	124	A_55_P2243828	FALSE	Mm.443869			gb|AK035826|tc|TC1620116|riken|9630008J17	chr6:141250879-141250938	mm|6qG2		GCGAGGTACAGTGTATGAAAGGATAAACTTTTCTCAAGCAGTGGAATAAAAAAGAAATTC			0
A_51_P303089	1.89376	6.49371e-05	Ttc28	tetratricopeptide repeat domain 28	Mus musculus tetratricopeptide repeat domain 28 (Ttc28), mRNA [NM_001267622]	NM_001267622	NM_001267622	209683	chr5	111716168	111716227	+	53944	28	26	A_51_P303089	FALSE	Mm.295660	ENSMUST00000040111		ref|NM_001267622|ens|ENSMUST00000040111|ens|ENSMUST00000156290|ref|XM_006534846	chr5:111716168-111716227	mm|5qF	GO:0003674(molecular_function)|GO:0005737(cytoplasm)|GO:0005813(centrosome)|GO:0005856(cytoskeleton)|GO:0007049(cell cycle)|GO:0007067(mitosis)|GO:0007346(regulation of mitotic cell cycle)|GO:0030496(midbody)|GO:0051301(cell division)|GO:0072686(mitotic spindle)	CTGTACTCTTGTCCAGGCATTTTAGAACTATGCAATTGTGGTTTAAAACACAACATTGTG	23331	TTC28	0
A_55_P2089820	1.89356	5.97663e-05	Adk	adenosine kinase	Mus musculus adenosine kinase (Adk), transcript variant 2, mRNA [NM_001243041]	NM_001243041	NM_001243041	11534	chr14	22059713	22059772	+	24383	118	108	A_55_P2089820	FALSE	Mm.188734	ENSMUST00000045376		ref|NM_001243041|ref|NM_134079|ens|ENSMUST00000045376|ref|XM_006518441	chr14:022059713-022059772	mm|14qA3	GO:0000166(nucleotide binding)|GO:0004001(adenosine kinase activity)|GO:0005524(ATP binding)|GO:0005634(nucleus)|GO:0005654(nucleoplasm)|GO:0005737(cytoplasm)|GO:0005829(cytosol)|GO:0006166(purine ribonucleoside salvage)|GO:0006167(AMP biosynthetic process)|GO:0006175(dATP biosynthetic process)|GO:0010613(positive regulation of cardiac muscle hypertrophy)|GO:0016301(kinase activity)|GO:0016310(ph…	AATTGTTACAAGAAAGAGAAGCACCTTGACCTGGAGCGGAACTGGGTGTTGGTAGAGAAA	132	ADK	0
A_55_P2042675	1.89335	0.000327541	Ttc28	tetratricopeptide repeat domain 28	Mus musculus tetratricopeptide repeat domain 28 (Ttc28), mRNA [NM_001267622]	NM_001267622	NM_001267622	209683	chr5	111531051	111531110	+	58146	15	150	A_55_P2042675	FALSE	Mm.295660	ENSMUST00000156290		ref|NM_001267622|ens|ENSMUST00000156290|ens|ENSMUST00000040111|ref|XM_006534844	chr5:111531051-111531110	mm|5qF	GO:0003674(molecular_function)|GO:0005737(cytoplasm)|GO:0005813(centrosome)|GO:0005856(cytoskeleton)|GO:0007049(cell cycle)|GO:0007067(mitosis)|GO:0007346(regulation of mitotic cell cycle)|GO:0030496(midbody)|GO:0051301(cell division)|GO:0072686(mitotic spindle)	AATTACCGAGAGGCCCTCACAAACCACAGGCATCAGCTGGTGCTCGCCATGAAGCTCAAG	23331	TTC28	0
A_52_P514352	1.89327	0.000685178	Kcnk5	potassium channel, subfamily K, member 5	Mus musculus potassium channel, subfamily K, member 5 (Kcnk5), mRNA [NM_021542]	NM_021542	NM_021542	16529	chr14	20959743	20959684	-	33042	92	173	A_52_P514352	FALSE	Mm.68998	ENSMUST00000024011		ref|NM_021542|ens|ENSMUST00000024011|ref|XM_006518590|gb|AK172608	chr14:020959743-020959684	mm|14qA3	GO:0005249(voltage-gated potassium channel activity)|GO:0005887(integral to plasma membrane)|GO:0022841(potassium ion leak channel activity)|GO:0030322(stabilization of membrane potential)|GO:0034765(regulation of ion transmembrane transport)|GO:0071804(cellular potassium ion transport)|GO:0071805(potassium ion transmembrane transport)	AATATTTTTTAATGAACTGTTATTTTTATACCCAGAGCCAGTAAAGAACAGGGTCCCTGC	8645	KCNK5	0
A_55_P2236382	1.8926	0.0164704	D8Ertd158e	DNA segment, Chr 8, ERATO Doi 158, expressed	Mus musculus 15 days embryo head cDNA, RIKEN full-length enriched library, clone:D930018D02 product:unclassifiable, full insert sequence. [AK142804]		AK142804	52186	chr8	111266627	111266686	+	12559	154	140	A_55_P2236382	FALSE				gb|AK142804|tc|TC1643970|riken|D930018D02	chr8:111266627-111266686	mm|8qD3		AATTTGGTTATGATGCCTTGGGAAGTGCTCGTTTGAGGTGGAACATTTCTGTACGTGCCT			0
A_52_P220440	1.89253	1.5463e-05	Slc6a15	solute carrier family 6 (neurotransmitter transporter), member 15	Mus musculus solute carrier family 6 (neurotransmitter transporter), member 15 (Slc6a15), transcript variant a, mRNA [NM_175328]	NM_175328	NM_175328	103098	chr10	102881388	102881447	+	45224	55	81	A_52_P220440	FALSE	Mm.458408	ENSMUST00000074204		ref|NM_175328|ref|NM_001252330|ens|ENSMUST00000074204|ens|ENSMUST00000179636	chr10:102881388-102881447	mm|10qD1	GO:0005298(proline:sodium symporter activity)|GO:0005328(neurotransmitter:sodium symporter activity)|GO:0005887(integral to plasma membrane)|GO:0006810(transport)|GO:0006811(ion transport)|GO:0006814(sodium ion transport)|GO:0006836(neurotransmitter transport)|GO:0006865(amino acid transport)|GO:0015293(symporter activity)|GO:0015804(neutral amino acid transport)|GO:0015820(leucine transport)|GO:…	AATTCATAATTTTGCCTTCAGCATAAGTTCCAGTATTACCATGAACAGTTGTGTGAGCCG	55117	SLC6A15	0
A_66_P139646	1.89244	0.0169474	Pla2g4c	phospholipase A2, group IVC (cytosolic, calcium-independent)	Mus musculus phospholipase A2, group IVC (cytosolic, calcium-independent) (Pla2g4c), transcript variant 1, mRNA [NM_001168504]	NM_001168504	NM_001168504	232889	chr7	13941578	13941637	+	45123	55	283	A_66_P139646	FALSE	Mm.223639	ENSMUST00000167232		ref|NM_001168504|ref|NM_001004762|ens|ENSMUST00000167232|ens|ENSMUST00000108528	chr7:013941578-013941637	mm|7qA1	GO:0005635(nuclear envelope)|GO:0005654(nucleoplasm)|GO:0005938(cell cortex)|GO:0046475(glycerophospholipid catabolic process)|GO:0047499(calcium-independent phospholipase A2 activity)	TACACACCAGACCTGGTGAGAGATTTGCTGAGGGTATCCAAGGAGAATGTGAAGAAAAAC	8605	PLA2G4C	0
A_55_P2453279	1.89237	5.77374e-05	Ncan	neurocan	Mus musculus neurocan (Ncan), mRNA [NM_007789]	NM_007789	NM_007789	13004	chr8	72619014	72618955	-	39925	71	183	A_55_P2453279	FALSE	Mm.268079	ENSMUST00000002412		ref|NM_007789|ens|ENSMUST00000002412|ref|XM_006509543|gb|AK082298	chr8:072619014-072618955	mm|8qB3.3	GO:0001501(skeletal system development)|GO:0005509(calcium ion binding)|GO:0005540(hyaluronic acid binding)|GO:0005576(extracellular region)|GO:0005578(proteinaceous extracellular matrix)|GO:0007155(cell adhesion)|GO:0007417(central nervous system development)|GO:0030246(carbohydrate binding)|GO:0051823(regulation of synapse structural plasticity)	GTTTTCTAACCCAGAGCCTGTCTTTTTAGCAGACCTCAATAAATCTCCTGCCTCAGATTC	1463	NCAN	0
A_55_P2126444	1.89224	0.000245039	1810032O08Rik	RIKEN cDNA 1810032O08 gene	Mus musculus RIKEN cDNA 1810032O08 gene (1810032O08Rik), transcript variant 3, long non-coding RNA [NR_027821]	NR_027821	NR_027821	66293	chr11	116536738	116536797	+	20025	131	296	A_55_P2126444	FALSE	Mm.432051	ENSMUST00000106378		ref|NR_027821|ens|ENSMUST00000106378|gb|AK037979|gb|BC055707	chr11:116536738-116536797	mm|11qE2	GO:0003674(molecular_function)|GO:0005575(cellular_component)|GO:0008150(biological_process)	ACTATCTGATAATGCTTGTTCCTAAAGTTTGTAGTTTTGATCACTTAGCTGCCTGTCTCC			0
A_52_P195922	1.89175	0.000145722	Exosc6	exosome component 6	Mus musculus exosome component 6 (Exosc6), mRNA [NM_028274]	NM_028274	NM_028274	72544	chr8	113581332	113581391	+	5651	175	180	A_52_P195922	FALSE	Mm.334810	ENSMUST00000034441		ref|NM_028274|ens|ENSMUST00000034441|gb|AK088532|gb|AK012102	chr8:113581332-113581391	mm|8qE1	GO:0000178(exosome (RNase complex))|GO:0003723(RNA binding)|GO:0005634(nucleus)|GO:0005737(cytoplasm)|GO:0006364(rRNA processing)|GO:0045006(DNA deamination)|GO:0045190(isotype switching)|GO:0045830(positive regulation of isotype switching)	TGGATTTACCTAGTAAATGAGATAAGGGGCTATGGTCTTGTAGGAGATGGACCCAGTGCA	118460	EXOSC6	0
A_51_P520718	1.89166	0.00534827	Ptger3	prostaglandin E receptor 3 (subtype EP3)	Mus musculus prostaglandin E receptor 3 (subtype EP3) (Ptger3), mRNA [NM_011196]	NM_011196	NM_011196	19218	chr3	157307508	157307567	+	14578	148	38	A_51_P520718	FALSE	Mm.30424	ENSMUST00000173533		ref|NM_011196|ens|ENSMUST00000173533|ens|ENSMUST00000041175|ref|XM_011240037	chr3:157307508-157307567	mm|3qH4	GO:0001660(fever generation)|GO:0002029(desensitization of G-protein coupled receptor protein signaling pathway)|GO:0004871(signal transducer activity)|GO:0004930(G-protein coupled receptor activity)|GO:0004955(prostaglandin receptor activity)|GO:0004957(prostaglandin E receptor activity)|GO:0005515(protein binding)|GO:0005829(cytosol)|GO:0005886(plasma membrane)|GO:0007165(signal transduction)|G…	CTAAATGTTCAGCTAGAGCTGTTAAAAGGAAAACCAGCTAATTATCATTCCAGTCCAATG	5733	PTGER3	0
A_55_P2119025	1.88766	0.167852	2610318N02Rik	RIKEN cDNA 2610318N02 gene	Mus musculus RIKEN cDNA 2610318N02 gene (2610318N02Rik), mRNA [NM_183287]	NM_183287	NM_183287	70458	chr16	17123665	17123606	-	44198	58	165	A_55_P2119025	FALSE	Mm.234165	ENSMUST00000093336		ref|NM_183287|ens|ENSMUST00000093336|ref|XM_006522539|gb|BC039993	chr16:017123665-017123606	mm|16qA3	GO:0003674(molecular_function)|GO:0005575(cellular_component)|GO:0008150(biological_process)	AAACTAGGAACTCCAGGACCTTGTGGAGAGAAACAGATGTTCACCTCTTTGTATGGAAAA			0
A_55_P2101696	1.88679	0.000247697	Gnat2	guanine nucleotide binding protein, alpha transducing 2	Mus musculus guanine nucleotide binding protein, alpha transducing 2 (Gnat2), mRNA [NM_008141]	NM_008141	NM_008141	14686	chr3	107904135	107904194	+	8048	168	305	A_55_P2101696	FALSE	Mm.439652	ENSMUST00000130013		ref|NM_008141|ens|ENSMUST00000130013|ens|ENSMUST00000142568|ens|ENSMUST00000058669	chr3:107904135-107904194	mm|3qF2.3	GO:0000166(nucleotide binding)|GO:0001580(detection of chemical stimulus involved in sensory perception of bitter taste)|GO:0001664(G-protein coupled receptor binding)|GO:0001750(photoreceptor outer segment)|GO:0001917(photoreceptor inner segment)|GO:0003924(GTPase activity)|GO:0004871(signal transducer activity)|GO:0005525(GTP binding)|GO:0005829(cytosol)|GO:0005834(heterotrimeric G-protein comp…	TAGAAGAAACCACCCCAAAGCCTAACAGCAAGCCTTCCTTACGTTGAGCGATAAAGTATT	2780	GNAT2	0
A_52_P201558	1.88591	0.0191748	Rgs7bp	regulator of G-protein signalling 7 binding protein	Mus musculus regulator of G-protein signalling 7 binding protein (Rgs7bp), mRNA [NM_029879]	NM_029879	NM_029879	52882	chr13	105737837	105737778	-	14016	150	177	A_52_P201558	FALSE	Mm.100348	ENSMUST00000063551		ref|NM_029879|ens|ENSMUST00000063551|gb|AK044700|riken|A930034F15	chr13:105737837-105737778	mm|13qD1	GO:0005515(protein binding)|GO:0005634(nucleus)|GO:0005737(cytoplasm)|GO:0005886(plasma membrane)|GO:0007186(G-protein coupled receptor signaling pathway)|GO:0009968(negative regulation of signal transduction)|GO:0016020(membrane)	TCAAATCCGACGAAAGTCTGGATAATTAAGTAAGTTGTGTAGGGATAACTAATTAACCTC	401190	RGS7BP	0
A_51_P477285	1.88255	0.00453277	1810014B01Rik	RIKEN cDNA 1810014B01 gene	Mus musculus RIKEN cDNA 1810014B01 gene (1810014B01Rik), non-coding RNA [NR_015572]	NR_015572	NR_015572	66263	chr10	86152352	86152411	+	36883	80	36	A_51_P477285	FALSE	Mm.392261			ref|NR_015572|gb|AK090016|gb|AK049515|gb|AK007490	chr10:86152352-86152411	mm|10qC1	GO:0003674(molecular_function)|GO:0005575(cellular_component)|GO:0008150(biological_process)	AGAAGCTGAGTTTAAGTATGTCCCTAAAAATATAATTACTTAACCCTCAGTGCATGTGAC			0
A_52_P925277	1.88161	0.0132451	Bcl11b	B cell leukemia/lymphoma 11B	Mus musculus B cell leukemia/lymphoma 11B (Bcl11b), transcript variant 1, mRNA [NM_001079883]	NM_001079883	NM_001079883	58208	chr12	109148991	109148932	-	3373	182	144	A_52_P925277	FALSE	Mm.392694	ENSMUST00000066060		ref|NM_001079883|ref|NM_021399|ref|NM_001286343|ens|ENSMUST00000066060	chr12:109148991-109148932	mm|12qF1	GO:0000978(RNA polymerase II core promoter proximal region sequence-specific DNA binding)|GO:0001077(RNA polymerase II core promoter proximal region sequence-specific DNA binding transcription factor activity involved in positive regulation of transcription)|GO:0003334(keratinocyte development)|GO:0003382(epithelial cell morphogenesis)|GO:0003676(nucleic acid binding)|GO:0005515(protein binding)|…	TTTATTACCTTTTCTATTACGTATCGTATGAGCTTTTGTTGTTTGCCTAGAGGGTTTGTC	64919	BCL11B	0
A_51_P403243	1.88045	6.59949e-06	Ccdc116	coiled-coil domain containing 116	Mus musculus coiled-coil domain containing 116 (Ccdc116), transcript variant 2, mRNA [NM_029779]	NM_029779	NM_029779	76872	chr16	17141203	17141144	-	33332	91	249	A_51_P403243	FALSE	Mm.475763	ENSMUST00000115709		ref|NM_029779|ref|NM_001306169|ens|ENSMUST00000115709|ens|ENSMUST00000115711	chr16:017141203-017141144	mm|16qA3	GO:0003674(molecular_function)|GO:0005813(centrosome)|GO:0008150(biological_process)	AATCAGGTGTTCTTGTCCATCTATTTCCAGTTTCCAGATGTTGTCAAAGATTAATAAAGG	164592	CCDC116	0
A_51_P511285	1.87831	0.00987961	Kcnj9	potassium inwardly-rectifying channel, subfamily J, member 9	Mus musculus potassium inwardly-rectifying channel, subfamily J, member 9 (Kcnj9), mRNA [NM_008429]	NM_008429	NM_008429	16524	chr1	174252283	174252224	-	36388	82	41	A_51_P511285	FALSE	Mm.261168	ENSMUST00000194204		ref|NM_008429|ens|ENSMUST00000194204|gb|U11860|gb|BC065161	chr1:174252283-174252224	mm|1qH3	GO:0005242(inward rectifier potassium channel activity)|GO:0005244(voltage-gated ion channel activity)|GO:0005886(plasma membrane)|GO:0005887(integral to plasma membrane)|GO:0006810(transport)|GO:0006811(ion transport)|GO:0006813(potassium ion transport)|GO:0010107(potassium ion import)|GO:0015467(G-protein activated inward rectifier potassium channel activity)|GO:0016020(membrane)|GO:0016021(int…	TCCTGCCACAGAAGCAAGAAGCAGAGGAAAGGCCATGGAGAGACTTAATAAAGGGTTTTA	3765	KCNJ9	0
A_51_P494822	1.87767	0.11094	Stag3	stromal antigen 3	Mus musculus stromal antigen 3 (Stag3), mRNA [NM_016964]	NM_016964	NM_016964	50878	chr5	138753402	138753461	+	50161	40	47	A_51_P494822	FALSE	Mm.285609	ENSMUST00000159189		ref|NM_016964|ens|ENSMUST00000159189|ens|ENSMUST00000159483|ens|ENSMUST00000161113	chr5:138753402-138753461	mm|5qG2	GO:0000775(chromosome, centromeric region)|GO:0000794(condensed nuclear chromosome)|GO:0000795(synaptonemal complex)|GO:0000800(lateral element)|GO:0000802(transverse filament)|GO:0001673(male germ cell nucleus)|GO:0005515(protein binding)|GO:0005615(extracellular space)|GO:0005634(nucleus)|GO:0005694(chromosome)|GO:0005730(nucleolus)|GO:0007049(cell cycle)|GO:0007059(chromosome segregation)|GO:0…	TTTTCAAATCTCTATTTCTTTCTGAAGTGGGTGCTATATATAGATGCTATGAGCCTTGTC	10734	STAG3	0
A_55_P2416087	1.8727	0.000503011	C530005A16Rik	RIKEN cDNA C530005A16 gene	Mus musculus RIKEN cDNA C530005A16 gene (C530005A16Rik), long non-coding RNA [NR_029450]	NR_029450	NR_029450	654318	chr4	116262459	116262400	-	5142	177	213	A_55_P2416087	FALSE	Mm.255685			ref|NR_029450|gb|AK086654|tc|TC1614477|riken|D930044C15	chr4:116262459-116262400	mm|4qD1	GO:0003674(molecular_function)|GO:0005575(cellular_component)|GO:0008150(biological_process)	TAAAAGCACATTTCTGCTCTGTGGTACACATTGTTTAGAGAAGGGAACAGCATGGCGGCA			0
A_55_P2178378	1.87252	0.000903483	Gas5	growth arrest specific 5	Mus musculus growth arrest specific 5 (Gas5), long non-coding RNA [NR_002840]	NR_002840	NR_002840	14455	chr1	162967350	162967409	+	48903	43	268	A_55_P2178378	FALSE	Mm.270065			ref|NR_002840|gb|BC080708|gb|BC055883|gb|AK083453	chr1:162967350-162967409	mm|1qH2.1		CATAACATTTAGCTTTTGAACATGCATGTGCTACCATCAGTACTAAATGGTGCCTTAAAT			0
A_55_P2160181	1.87143	0.000635018	Dusp15	dual specificity phosphatase-like 15	Mus musculus dual specificity phosphatase-like 15 (Dusp15), transcript variant 2, mRNA [NM_145744]	NM_145744	NM_145744	252864	chr2	152770728	152770669	-	39921	71	191	A_55_P2160181	FALSE	Mm.330671	ENSMUST00000037715		ref|NM_145744|ens|ENSMUST00000037715|gb|AF357887|nap|NAP057805-1	chr2:152770728-152770669	mm|2qH1	GO:0004721(phosphoprotein phosphatase activity)|GO:0004725(protein tyrosine phosphatase activity)|GO:0005575(cellular_component)|GO:0006470(protein dephosphorylation)|GO:0007179(transforming growth factor beta receptor signaling pathway)|GO:0008138(protein tyrosine/serine/threonine phosphatase activity)|GO:0016311(dephosphorylation)|GO:0016787(hydrolase activity)|GO:0016791(phosphatase activity)|…	TTCCTCAAACCCACAGTCTATCTTTCACCTCAAAATCTTTGTACGTGCTACTTAAGAGTA	128853	DUSP15	0
A_51_P431734	1.86871	1.80633e-06	Fam185a	family with sequence similarity 185, member A	Mus musculus family with sequence similarity 185, member A (Fam185a), mRNA [NM_177869]	NM_177869	NM_177869	330050	chr5	20987207	20987266	+	41638	66	37	A_51_P431734	FALSE	Mm.40655	ENSMUST00000056045		ref|NM_177869|ens|ENSMUST00000056045|gb|BC055342|gb|BC050111	chr5:020987207-020987266	mm|5qA3	GO:0003674(molecular_function)|GO:0005737(cytoplasm)|GO:0008150(biological_process)	TTATAGGGAAAATCGGCTTCCTTATACCTGGATGATGTAATTTCTTACTGGCTTCAGCTA	222234	FAM185A	0
A_55_P1999203	1.86618	0.0178771	Vmn1r217	vomeronasal 1 receptor 217	Mus musculus vomeronasal 1 receptor 217 (Vmn1r217), mRNA [NM_134239]	NM_134239	NM_134239	171273	chr13	23205860	23205801	-	62674	1	278	A_55_P1999203	FALSE	Mm.377225	ENSMUST00000091721		ref|NM_134239|ref|NM_134237|ens|ENSMUST00000091721|ens|ENSMUST00000072385	chr13:023205860-023205801	mm|13qA3.1	GO:0005550(pheromone binding)|GO:0005887(integral to plasma membrane)|GO:0007186(G-protein coupled receptor signaling pathway)|GO:0016503(pheromone receptor activity)|GO:0019236(response to pheromone)	CTGATTGTGCTCTTTCCCTGTTTTTAAGTTTGTCACTGGGAGACAGTTCCTTGATGATAA			0
A_55_P2057872	1.86479	0.00170893	Gm6654	predicted pseudogene 6654	Mus musculus predicted pseudogene 6654 (Gm6654), non-coding RNA [NR_038089]	NR_038089	NR_038089	626175	chr6	146596187	146596128	-	31511	96	284	A_55_P2057872	FALSE	Mm.391544			ref|NR_038089|tc|TC1746921	chr6:146596187-146596128	mm|6qG3		TATACAAACTGCAATAGAGACACAGGTGCTGAATGGTTAAGAGCACTGGCTGCGCTCTTT			0
A_55_P2143311	1.8599	1.782e-06	Pdxk	pyridoxal (pyridoxine, vitamin B6) kinase	Mus musculus pyridoxal (pyridoxine, vitamin B6) kinase (Pdxk), mRNA [NM_172134]	NM_172134	NM_172134	216134	chr10	77903430	77903371	-	27529	109	47	A_55_P2143311	FALSE	Mm.206159	ENSMUST00000041616		ref|NM_172134|ens|ENSMUST00000041616|gb|AK166078|gb|AK080846	chr10:077903430-077903371	mm|10qC1	GO:0000166(nucleotide binding)|GO:0000287(magnesium ion binding)|GO:0005524(ATP binding)|GO:0005634(nucleus)|GO:0005654(nucleoplasm)|GO:0005737(cytoplasm)|GO:0005829(cytosol)|GO:0008144(drug binding)|GO:0008270(zinc ion binding)|GO:0008283(cell proliferation)|GO:0008478(pyridoxal kinase activity)|GO:0009443(pyridoxal 5'-phosphate salvage)|GO:0016301(kinase activity)|GO:0016310(phosphorylation)|GO…	CCCGAGAGTCGGGTCTCAGCCAGTCTCTAGCGTGAAAAATGTGCCATTGTGCTATTTTTT	8566	PDXK	0
A_51_P214197	1.8587	0.000930151	Stk17b	serine/threonine kinase 17b (apoptosis-inducing)	Mus musculus serine/threonine kinase 17b (apoptosis-inducing) (Stk17b), mRNA [NM_133810]	NM_133810	NM_133810	98267	chr1	53813268	53813209	-	37836	77	98	A_51_P214197	FALSE	Mm.25559	ENSMUST00000027263		ref|NM_133810|ens|ENSMUST00000027263|ref|XM_006496359|gb|BC006579	chr1:053813268-053813209	mm|1qC1.1	GO:0000166(nucleotide binding)|GO:0004672(protein kinase activity)|GO:0004674(protein serine/threonine kinase activity)|GO:0005524(ATP binding)|GO:0005634(nucleus)|GO:0005886(plasma membrane)|GO:0006468(protein phosphorylation)|GO:0006915(apoptotic process)|GO:0012501(programmed cell death)|GO:0015629(actin cytoskeleton)|GO:0016020(membrane)|GO:0016301(kinase activity)|GO:0016310(phosphorylation)…	GATAACAGATCTCATAAATATGCTACTCTATCAGACTCCGTCGCCAAAACAAATTAAAAG	9262	STK17B	0
A_55_P2133632	1.85813	0.000305675	Sipa1l2	signal-induced proliferation-associated 1 like 2	Mus musculus signal-induced proliferation-associated 1 like 2 (Sipa1l2), mRNA [NM_001081337]	NM_001081337	NM_001081337	244668	chr8	127942073	127942014	-	12683	154	219	A_55_P2133632	FALSE	Mm.271668	ENSMUST00000108775		ref|NM_001081337|ens|ENSMUST00000108775|ref|XM_006531024|ref|XM_006531025	chr8:127942073-127942014	mm|8qE2	GO:0003674(molecular_function)|GO:0005096(GTPase activator activity)|GO:0005575(cellular_component)|GO:0008150(biological_process)|GO:0051056(regulation of small GTPase mediated signal transduction)	GCTGGCTAACACGTTGTTTGTATTGCTTCTCCATTTTTAACTGTTATATTTGAGATGAAC	57568	SIPA1L2	0
A_55_P2057112	1.8575	0.0858425	Prl8a2	prolactin family 8, subfamily a, member 2	Mus musculus prolactin family 8, subfamily a, member 2 (Prl8a2), transcript variant 1, mRNA [NM_010088]	NM_010088	NM_010088	13529	chr13	27445965	27446024	+	54317	27	263	A_55_P2057112	FALSE	Mm.291450	ENSMUST00000018403		ref|NM_010088|ref|NM_001289919|ens|ENSMUST00000018403|ens|ENSMUST00000110363	chr13:027445965-027446024	mm|13qA3.1	GO:0001666(response to hypoxia)|GO:0003674(molecular_function)|GO:0005575(cellular_component)|GO:0060135(maternal process involved in female pregnancy)	CCATGACAGTCCATTGCTGAGAACTTGCTTTTAATTGTATAGCTTTTGAATGCATTTGTA	5617	PRL	0
A_66_P111572	1.8544	0.00201714	Fam122b	family with sequence similarity 122, member B	Mus musculus family with sequence similarity 122, member B (Fam122b), transcript variant 2, mRNA [NM_030167]	NM_030167	NM_030167	78755	chrX	50596933	50596874	-	13123	152	324	A_66_P111572	FALSE	Mm.28559	ENSMUST00000114838		ref|NM_030167|ref|NM_001166365|ref|NM_001166583|ens|ENSMUST00000114838	chrX:050596933-050596874	mm|XqA5	GO:0003674(molecular_function)|GO:0005575(cellular_component)|GO:0008150(biological_process)	GGTAATATGCTAATCCACAGAGCAGCTTTGTTGACAGTACCCCTTTATTTTTATATAAAG	159090	FAM122B	0
A_55_P2029417	1.85296	8.38892e-06	2610318N02Rik	RIKEN cDNA 2610318N02 gene	Mus musculus RIKEN cDNA 2610318N02 gene (2610318N02Rik), mRNA [NM_183287]	NM_183287	NM_183287	70458	chr16	17113611	17113552	-	6543	173	35	A_55_P2029417	FALSE	Mm.234165	ENSMUST00000093336		ref|NM_183287|ens|ENSMUST00000093336|ref|XM_006522539|ref|XM_006522540	chr18:060586797-060586856	mm|18qD3	GO:0003674(molecular_function)|GO:0005575(cellular_component)|GO:0008150(biological_process)	ACCCAATGATGATTCAGAGAATGACCCTGGCAGCGCAGAGTCCACTCCTGCCAAGGAGAG			0
A_55_P1993549	1.84987	0.0253847	Npnt	nephronectin	Mus musculus nephronectin (Npnt), transcript variant 3, mRNA [NM_001287101]	NM_001287101	NM_001287101	114249	chr3	132545860	132545801	-	36114	82	262	A_55_P1993549	FALSE	Mm.279310			ref|NM_001287101|ref|NM_001287102|ref|NM_033525|ref|NM_001029836	chr3:132545860-132545801	mm|3qG3	GO:0001657(ureteric bud development)|GO:0001658(branching involved in ureteric bud morphogenesis)|GO:0005178(integrin binding)|GO:0005509(calcium ion binding)|GO:0005576(extracellular region)|GO:0005578(proteinaceous extracellular matrix)|GO:0005604(basement membrane)|GO:0007155(cell adhesion)|GO:0007160(cell-matrix adhesion)|GO:0007275(multicellular organismal development)|GO:0010694(positive re…	GCTAAGCCCAATCCTTTACAAAAAAGAAGTGTGATCATATTCATTCTCCTCCTACTCCCT	255743	NPNT	0
A_55_P2021821	1.84984	0.012209	Prmt1	protein arginine N-methyltransferase 1	Mus musculus protein arginine N-methyltransferase 1 (Prmt1), transcript variant 1, mRNA [NM_019830]	NM_019830	NM_019830	15469	chr7	52232207	52232148	-	44119	58	323	A_55_P2021821	FALSE	Mm.27545			ref|NM_019830|ref|NM_001252476|ref|NM_001252477|ref|NR_045521	chr7:052232207-052232148	mm|7qB4	GO:0000179(rRNA (adenine-N6,N6-)-dimethyltransferase activity)|GO:0001701(in utero embryonic development)|GO:0003880(protein C-terminal carboxyl O-methyltransferase activity)|GO:0004809(tRNA (guanine-N2-)-methyltransferase activity)|GO:0005515(protein binding)|GO:0005634(nucleus)|GO:0005737(cytoplasm)|GO:0005829(cytosol)|GO:0006355(regulation of transcription, DNA-dependent)|GO:0006479(protein me…	GGGTACATCGTGACTGTGTTTTTCATAACTTATGTTTTTATATGGTTGCGTTTATGCCAA	3276	PRMT1	0
A_55_P2002376	1.84975	8.16764e-06	Srm	spermidine synthase	Mus musculus spermidine synthase (Srm), mRNA [NM_009272]	NM_009272	NM_009272	20810	chr4	147968254	147968313	+	33811	89	276	A_55_P2002376	FALSE	Mm.10	ENSMUST00000140129		ref|NM_009272|ens|ENSMUST00000140129|ens|ENSMUST00000006611|gb|AK051101	chr4:147968254-147968313	mm|4qE2	GO:0003824(catalytic activity)|GO:0004766(spermidine synthase activity)|GO:0006595(polyamine metabolic process)|GO:0006596(polyamine biosynthetic process)|GO:0008295(spermidine biosynthetic process)|GO:0016740(transferase activity)|GO:0042803(protein homodimerization activity)	GAAATACTATAACTCGGACATGCACCGTGCCGCCTTCGTACTGCCCGAGTTCACCCGGAA	6723	SRM	0
A_51_P300709	1.84734	9.23293e-06	Srm	spermidine synthase	Mus musculus spermidine synthase (Srm), mRNA [NM_009272]	NM_009272	NM_009272	20810	chr4	147968433	147968492	+	22337	124	264	A_51_P300709	FALSE	Mm.10	ENSMUST00000006611		ref|NM_009272|ens|ENSMUST00000006611|gb|AK219795|gb|AK051101	chr4:147968433-147968492	mm|4qE2	GO:0003824(catalytic activity)|GO:0004766(spermidine synthase activity)|GO:0006595(polyamine metabolic process)|GO:0006596(polyamine biosynthetic process)|GO:0008295(spermidine biosynthetic process)|GO:0016740(transferase activity)|GO:0042803(protein homodimerization activity)	GACACCACCCGAGACCTCAATCGGATTGGACCAAGGATCTTCCAAGTTGTCTGGGGACCA	6723	SRM	0
A_52_P369123	1.84651	7.78929e-05	Fam189a2	family with sequence similarity 189, member A2	Mus musculus family with sequence similarity 189, member A2 (Fam189a2), mRNA [NM_001114174]	NM_001114174	NM_001114174	381217	chr19	24049950	24049891	-	39949	71	135	A_52_P369123	FALSE	Mm.426078	ENSMUST00000096164		ref|NM_001114174|ens|ENSMUST00000096164|ref|XM_006527156|ref|XR_386486	chr19:024049950-024049891	mm|19qB	GO:0003674(molecular_function)|GO:0005575(cellular_component)|GO:0008150(biological_process)	TCCGGACATTCATGAACTTGTAGAGAACATAAAGTCTGTTCTGAAATCCGATGAGGGGCA	9413	FAM189A2	0
A_51_P352303	1.84613	0.000244741	Homer2	homer homolog 2 (Drosophila)	Mus musculus homer homolog 2 (Drosophila) (Homer2), transcript variant 1, mRNA [NM_011983]	NM_011983	NM_011983	26557	chr7	88756258	88756199	-	40747	68	180	A_51_P352303	FALSE	Mm.228	ENSMUST00000026922		ref|NM_011983|ref|NM_001164087|ref|NM_001164086|ens|ENSMUST00000026922	chr7:088756258-088756199	mm|7qD3	GO:0003779(actin binding)|GO:0005515(protein binding)|GO:0005634(nucleus)|GO:0005654(nucleoplasm)|GO:0005730(nucleolus)|GO:0005737(cytoplasm)|GO:0005886(plasma membrane)|GO:0007216(G-protein coupled glutamate receptor signaling pathway)|GO:0008277(regulation of G-protein coupled receptor protein signaling pathway)|GO:0016020(membrane)|GO:0019904(protein domain specific binding)|GO:0030054(cell ju…	CCGAAAACAGAGTGAAATCATACCTCAGCTCATGTCCGAGTGTGAATATGTCTCTGAGAA	9455	HOMER2	0
A_51_P408946	1.84274	0.000259596	Ccne1	cyclin E1	Mus musculus cyclin E1 (Ccne1), mRNA [NM_007633]	NM_007633	NM_007633	12447	chr7	38882960	38882937	-	17032	141	49	A_51_P408946	FALSE	Mm.16110	ENSMUST00000108023		ref|NM_007633|ens|ENSMUST00000108023|gb|X75888|gb|AK163046	chr7:038883084-038883026	mm|7qB2	GO:0000082(G1/S transition of mitotic cell cycle)|GO:0000307(cyclin-dependent protein kinase holoenzyme complex)|GO:0005515(protein binding)|GO:0005634(nucleus)|GO:0005654(nucleoplasm)|GO:0005737(cytoplasm)|GO:0005813(centrosome)|GO:0006270(DNA-dependent DNA replication initiation)|GO:0006468(protein phosphorylation)|GO:0007049(cell cycle)|GO:0016055(Wnt receptor signaling pathway)|GO:0016301(kin…	GCATGTCCTGCCTTCATGAACTCTTATTTTGTAAGGTGCTGCTATGTCTATCAATTTTTA	898	CCNE1	0
A_51_P463452	1.84078	0.000643605	Acsl1	acyl-CoA synthetase long-chain family member 1	Mus musculus acyl-CoA synthetase long-chain family member 1 (Acsl1), transcript variant 2, mRNA [NM_007981]	NM_007981	NM_007981	14081	chr8	47619774	47619833	+	60638	8	85	A_51_P463452	FALSE	Mm.210323	ENSMUST00000110372		ref|NM_007981|ref|NM_001302163|ens|ENSMUST00000110372|ens|ENSMUST00000034046	chr8:047619774-047619833	mm|8qB1.1	GO:0000166(nucleotide binding)|GO:0001676(long-chain fatty acid metabolic process)|GO:0003824(catalytic activity)|GO:0004467(long-chain fatty acid-CoA ligase activity)|GO:0005524(ATP binding)|GO:0005739(mitochondrion)|GO:0005741(mitochondrial outer membrane)|GO:0005777(peroxisome)|GO:0005778(peroxisomal membrane)|GO:0005783(endoplasmic reticulum)|GO:0005886(plasma membrane)|GO:0006629(lipid metab…	AGAGCTACGGAACTATTTCAGGTCGCAGATAGATGAACTGTACGCCACCATCAAGATCTA	2180	ACSL1	0
A_66_P122219	1.83905	0.000379741	Kcnd3	potassium voltage-gated channel, Shal-related family, member 3	Mus musculus potassium voltage-gated channel, Shal-related family, member 3 (Kcnd3), transcript variant 1, mRNA [NM_001039347]	NM_001039347	NM_001039347	56543	chr3	105476854	105476913	+	20839	129	307	A_66_P122219	FALSE	Mm.44530	ENSMUST00000098761		ref|NM_001039347|ens|ENSMUST00000098761|ref|XM_006501755|ref|XM_006501756	chr3:105476854-105476913	mm|3qF2.2	GO:0005216(ion channel activity)|GO:0005244(voltage-gated ion channel activity)|GO:0005249(voltage-gated potassium channel activity)|GO:0005250(A-type (transient outward) potassium channel activity)|GO:0005267(potassium channel activity)|GO:0005515(protein binding)|GO:0005886(plasma membrane)|GO:0005887(integral to plasma membrane)|GO:0005901(caveola)|GO:0006810(transport)|GO:0006811(ion transpor…	TACTGAGTCCTGTGCCACTGCTGTACCTGATGTATCCAATCTGGATTAAACAAATTACGT	3752	KCND3	0
A_55_P2275692	1.83661	0.0631116	2900005J15Rik	RIKEN cDNA 2900005J15 gene	Mus musculus RIKEN cDNA 2900005J15 gene (2900005J15Rik), long non-coding RNA [NR_027851]	NR_027851	NR_027851	67261	chr5	24608620	24608679	+	40870	68	261	A_55_P2275692	FALSE	Mm.461781			ref|NR_027851|gb|AK076604|tc|TC1589307|riken|4921531M11	chr5:24608620-24608679	mm|5qA3	GO:0003674(molecular_function)|GO:0005575(cellular_component)|GO:0008150(biological_process)	AGAGGCTGATTTCAGGATATCCTCTTTAATCCTCTCTCAAACCTTTTTGTTGTTATTTTG			0
A_51_P279038	1.83629	0.00357223	Ppargc1a	peroxisome proliferative activated receptor, gamma, coactivator 1 alpha	Mus musculus peroxisome proliferative activated receptor, gamma, coactivator 1 alpha (Ppargc1a), transcript variant 1, mRNA [NM_008904]	NM_008904	NM_008904	19017	chr5	51848987	51848928	-	54841	25	200	A_51_P279038	FALSE	Mm.259072	ENSMUST00000132734		ref|NM_008904|ref|NR_027710|ens|ENSMUST00000132734|ref|XM_006503774	chr5:051848987-051848928	mm|5qC1	GO:0000166(nucleotide binding)|GO:0001104(RNA polymerase II transcription cofactor activity)|GO:0002021(response to dietary excess)|GO:0003676(nucleic acid binding)|GO:0003677(DNA binding)|GO:0003682(chromatin binding)|GO:0003713(transcription coactivator activity)|GO:0003723(RNA binding)|GO:0005515(protein binding)|GO:0005634(nucleus)|GO:0005829(cytosol)|GO:0006351(transcription, DNA-dependent)|…	CCCCTTCAAATGGCAGCATTTCCATGAAGACACACTTAAAACCTACAACTTCAAAATGTT	10891	PPARGC1A	0
A_55_P2145521	1.83346	0.00179486	Stk38l	serine/threonine kinase 38 like	Mus musculus serine/threonine kinase 38 like (Stk38l), mRNA [NM_172734]	NM_172734	NM_172734	232533	chr6	146725000	146725059	+	48450	45	189	A_55_P2145521	FALSE	Mm.322121	ENSMUST00000111644		ref|NM_172734|ens|ENSMUST00000111644|ens|ENSMUST00000001675|ref|XM_006536066	chr6:146725000-146725059	mm|6qG3	GO:0000166(nucleotide binding)|GO:0000287(magnesium ion binding)|GO:0003779(actin binding)|GO:0004672(protein kinase activity)|GO:0004674(protein serine/threonine kinase activity)|GO:0005524(ATP binding)|GO:0005737(cytoplasm)|GO:0005856(cytoskeleton)|GO:0006468(protein phosphorylation)|GO:0015629(actin cytoskeleton)|GO:0016020(membrane)|GO:0016301(kinase activity)|GO:0016310(phosphorylation)|GO:0…	GCTGAGTTTCAGAAATGACCATGAAAGCTGCTTGTAGAACCTAGTATGTTTTTATTAAAC	23012	STK38L	0
A_55_P2012498	1.83328	2.68496e-05	Cdca7	cell division cycle associated 7	Mus musculus cell division cycle associated 7 (Cdca7), mRNA [NM_025866]	NM_025866	NM_025866	66953	chr2	72324849	72324908	+	39143	73	108	A_55_P2012498	FALSE	Mm.270676	ENSMUST00000102691		ref|NM_025866|ens|ENSMUST00000102691|ref|XM_006500053|gb|AK028671	chr16:016196493-016196434	mm|16qA2	GO:0003674(molecular_function)|GO:0005634(nucleus)|GO:0005654(nucleoplasm)|GO:0005737(cytoplasm)|GO:0006351(transcription, DNA-dependent)|GO:0006355(regulation of transcription, DNA-dependent)|GO:0006915(apoptotic process)|GO:0042127(regulation of cell proliferation)	GCTCAGTTGGATCTTGAATCATTCAGTGTAAATACAGCTTTTTGCTCTGTAATGCTTTTA	83879	CDCA7	0
A_55_P2235136	1.8318	0.00936622	Dpy19l2	dpy-19-like 2 (C. elegans)	Mus musculus dpy-19-like 2 (C. elegans) (Dpy19l2), mRNA [NM_001166207]	NM_001166207	NM_001166207	320752	chr9	24361559	24361500	-	28750	105	229	A_55_P2235136	FALSE	Mm.46158	ENSMUST00000133010		ref|NM_001166207|ens|ENSMUST00000133010|ref|XM_006510427|ref|XM_006510428	chr9:024361559-024361500	mm|9qA4	GO:0000009(alpha-1,6-mannosyltransferase activity)|GO:0000026(alpha-1,2-mannosyltransferase activity)|GO:0000030(mannosyltransferase activity)|GO:0000033(alpha-1,3-mannosyltransferase activity)|GO:0001962(alpha-1,3-galactosyltransferase activity)|GO:0003674(molecular_function)|GO:0003980(UDP-glucose:glycoprotein glucosyltransferase activity)|GO:0004376(glycolipid mannosyltransferase activity)|GO:…	AAGTAATTATTAGAATTCAACAAAAATGGTACGAGCTATGTTAACCAATAAAGTGTTCCT	283417	DPY19L2	0
A_55_P2086423	1.83178	0.000219402	Recql4	RecQ protein-like 4	Mus musculus RecQ protein-like 4 (Recql4), mRNA [NM_058214]	NM_058214	NM_058214	79456	chr15	76534230	76534171	-	15161	146	184	A_55_P2086423	FALSE	Mm.18373	ENSMUST00000036852		ref|NM_058214|ens|ENSMUST00000036852|ref|XM_006521546|ref|XM_006521547	chr15:076534230-076534171	mm|15qD3	GO:0000166(nucleotide binding)|GO:0000405(bubble DNA binding)|GO:0000733(DNA strand renaturation)|GO:0001501(skeletal system development)|GO:0003676(nucleic acid binding)|GO:0004386(helicase activity)|GO:0005524(ATP binding)|GO:0005634(nucleus)|GO:0005737(cytoplasm)|GO:0006260(DNA replication)|GO:0006310(DNA recombination)|GO:0008026(ATP-dependent helicase activity)|GO:0008270(zinc ion binding)|G…	CTGGACTTTCATGCCCTGATGCACCTAGCTACAGAAGAGCTCCTGCTGAGAGGCCGATGA	9401	RECQL4	0
A_52_P565847	1.83168	0.0198565	AU018091	expressed sequence AU018091	Mus musculus expressed sequence AU018091 (AU018091), mRNA [NM_001004153]	NM_001004153	NM_001004153	245128	chr7	3155339	3155280	-	4458	179	269	A_52_P565847	FALSE	Mm.268551	ENSMUST00000171749		ref|NM_001004153|ens|ENSMUST00000171749|ens|ENSMUST00000181669|ref|XM_006539984	chr7:003155339-003155280	mm|7qA1	GO:0000064(L-ornithine transmembrane transporter activity)|GO:0003674(molecular_function)|GO:0005575(cellular_component)|GO:0005887(integral to plasma membrane)|GO:0008150(biological_process)|GO:0015181(arginine transmembrane transporter activity)|GO:0015189(L-lysine transmembrane transporter activity)|GO:0015297(antiporter activity)	ATCTTCTGAACATTATTATTTATGGAGAGAGAGAAAACACATGTGTCACAGTGTTTGTGG			0
A_52_P429876	1.831	2.33714e-05	Tbx20	T-box 20	Mus musculus T-box 20 (Tbx20), transcript variant 1, mRNA [NM_194263]	NM_194263	NM_194263	57246	chr9	24527809	24527750	-	26259	112	292	A_52_P429876	FALSE	Mm.31452	ENSMUST00000052946		ref|NM_194263|ens|ENSMUST00000052946|gb|AK052389|gb|AF306667	chr9:024527809-024527750	mm|9qA4	GO:0000122(negative regulation of transcription from RNA polymerase II promoter)|GO:0000977(RNA polymerase II regulatory region sequence-specific DNA binding)|GO:0000978(RNA polymerase II core promoter proximal region sequence-specific DNA binding)|GO:0001077(RNA polymerase II core promoter proximal region sequence-specific DNA binding transcription factor activity involved in positive regulation…	GTAGTTGGTTTCCAGACAAAATACAGATGTGCATTTCTCTTAAAAACCCATTGTGAGTGG	57057	TBX20	0
A_51_P313397	1.83024	0.000227996	1700121C10Rik	RIKEN cDNA 1700121C10 gene	Mus musculus adult male testis cDNA, RIKEN full-length enriched library, clone:1700121C10 product:unclassifiable, full insert sequence. [AK007220]		AK007220	67364	chr8	97318195	97318136	-	8656	166	74	A_51_P313397	FALSE	Mm.245984			gb|AK007220|gb|AK018972|gb|BY707324|tc|TC1691081	chr8:97318195-97318136	mm|8qC5	GO:0003674(molecular_function)|GO:0005575(cellular_component)|GO:0008150(biological_process)	ACCAGTCTCTCTGATCATCTTCCTACGTACTCCCCTTTAGATGATCACTTATATTGTCTG			0
A_55_P1972277	1.82975	0.00807239	Samd11	sterile alpha motif domain containing 11	Mus musculus sterile alpha motif domain containing 11 (Samd11), mRNA [NM_001110516]	NM_001110516	NM_001110516	231004	unmapped	-1	-1		40733	68	208	A_55_P1972277	FALSE	Mm.406833			ref|NM_001110516|gb|AK149268|riken|A930008A01	unmapped		GO:0000122(negative regulation of transcription from RNA polymerase II promoter)|GO:0005634(nucleus)|GO:0032093(SAM domain binding)|GO:0042731(PH domain binding)|GO:0043621(protein self-association)	TCTCCATCTACAGAGAAGGAAGAGGCCACATAAATAAATTCTGCTATATCATGAAAAAGC	148398	SAMD11	0
A_55_P1980471	1.82794	0.000142822	Grin3a	glutamate receptor ionotropic, NMDA3A	Mus musculus glutamate receptor ionotropic, NMDA3A (Grin3a), transcript variant 1, mRNA [NM_001276355]	NM_001276355	NM_001276355	242443	chr4	49678157	49678098	-	59836	10	50	A_55_P1980471	FALSE	Mm.440095	ENSMUST00000093859		ref|NM_001276355|ref|NM_001033351|ens|ENSMUST00000093859|ens|ENSMUST00000076674	chr4:049678157-049678098	mm|4qB1	GO:0004970(ionotropic glutamate receptor activity)|GO:0004972(N-methyl-D-aspartate selective glutamate receptor activity)|GO:0005234(extracellular-glutamate-gated ion channel activity)|GO:0005262(calcium channel activity)|GO:0005515(protein binding)|GO:0005886(plasma membrane)|GO:0006816(calcium ion transport)|GO:0016020(membrane)|GO:0016358(dendrite development)|GO:0016594(glycine binding)|GO:00…	GTAAGCAGGAAGACAGAGCTTGAGGAGTATCAAAGGACGAACCGGACTTGTGAATCCTAG	116443	GRIN3A	0
A_55_P2147220	1.82723	3.01057e-06	Ak2	adenylate kinase 2	Mus musculus adenylate kinase 2 (Ak2), transcript variant 2, mRNA [NM_016895]	NM_016895	NM_016895	11637	chr4	128687940	128687999	+	53420	30	89	A_55_P2147220	FALSE	Mm.29460	ENSMUST00000102604		ref|NM_016895|ens|ENSMUST00000102604|ref|XR_376293|gb|AK010951	chr4:128687940-128687999	mm|4qD2.2	GO:0000166(nucleotide binding)|GO:0004017(adenylate kinase activity)|GO:0005524(ATP binding)|GO:0005739(mitochondrion)|GO:0005743(mitochondrial inner membrane)|GO:0005758(mitochondrial intermembrane space)|GO:0005829(cytosol)|GO:0006139(nucleobase-containing compound metabolic process)|GO:0006172(ADP biosynthetic process)|GO:0016301(kinase activity)|GO:0016310(phosphorylation)|GO:0016740(transfer…	GGAGGGGCTCCTCGAGAGAAGATTGGAACAGTGGCAGTGTTATAATTAGTAAGGTTTTTT	204	AK2	0
A_55_P2042550	1.82695	0.00905582	Mccc2	methylcrotonoyl-Coenzyme A carboxylase 2 (beta)	Mus musculus adult male testis cDNA, RIKEN full-length enriched library, clone:4930552N12 product:hypothetical protein, full insert sequence. [AK019760]		AK019760	78038	chr13	100728505	100728446	-	31523	96	260	A_55_P2042550	FALSE	Mm.137327			gb|AK019760|tc|TC1589537|riken|4930552N12|nap|NAP116219-1	chr13:100728505-100728446	mm|13qD1	GO:0000166(nucleotide binding)|GO:0004485(methylcrotonoyl-CoA carboxylase activity)|GO:0005524(ATP binding)|GO:0005739(mitochondrion)|GO:0015936(coenzyme A metabolic process)|GO:0016874(ligase activity)	AATCACTCCAAGCACATGCTATGGGCATCTCTTTACTTTCACTGTACAGTAAATTCTCTG	64087	MCCC2	0
A_55_P2022748	1.82643	0.00305969	Tenm3	teneurin transmembrane protein 3	Mus musculus 9 days embryo whole body cDNA, RIKEN full-length enriched library, clone:D030019H23 product:odd Oz/ten-m homolog 3 (Drosophila), full insert sequence. [AK050784]		AK050784	23965	chr8	49420205	49420146	-	52853	31	240	A_55_P2022748	FALSE	Mm.42191			gb|AK050784|tc|TC1616742|riken|D030019H23|nap|NAP085122-1	chr8:49420205-49420146	mm|8qB1.2	GO:0005887(integral to plasma membrane)|GO:0007155(cell adhesion)|GO:0007156(homophilic cell adhesion)|GO:0007165(signal transduction)|GO:0010976(positive regulation of neuron projection development)|GO:0016020(membrane)|GO:0016021(integral to membrane)|GO:0030154(cell differentiation)|GO:0042803(protein homodimerization activity)|GO:0042995(cell projection)|GO:0046982(protein heterodimerization …	GCCTGACACTTCTTCAAATATGATGATCTTCACAAATGCCTGTAGGTTGGATAAAATATT	55714	TENM3	0
A_55_P2218748	1.82505	0.0514812	C77488	EST C77488	H3037A08-5 NIA Mouse 15K cDNA Clone Set Mus musculus cDNA clone H3037A08 5'. [BG079202]		BG079202	30874	chr14	91618058	91618117	+	75	192	180	A_55_P2218748	FALSE	Mm.172634			gb|BG079202|tc|TC1642839	chr14:91618058-91618117	mm|14qE2.1		TTTGTTATGACCAGCTTGTTTGTTATCCCAGGGAAACCTGCCCTTTTCTGAAGAGAAGCG			0
A_51_P291501	1.82193	0.014664	Ccno	cyclin O	Mus musculus cyclin O (Ccno), mRNA [NM_001081062]	NM_001081062	NM_001081062	218630	chr13	113780810	113780869	+	7590	169	238	A_51_P291501	FALSE	Mm.25457	ENSMUST00000038404		ref|NM_001081062|ens|ENSMUST00000038404|gb|AK053890|gb|AK086507	chr13:113780810-113780869	mm|13qD2.2	GO:0004844(uracil DNA N-glycosylase activity)|GO:0005634(nucleus)|GO:0005654(nucleoplasm)|GO:0005737(cytoplasm)|GO:0006284(base-excision repair)|GO:0007049(cell cycle)|GO:0030030(cell projection organization)|GO:0042384(cilium assembly)|GO:0051301(cell division)	CAAGAGACAGTCCCTGGTGCAACACAGGAAATGCTGGAATGCCTTTTGCGTATTGTTATA	10309	CCNO	0
A_51_P392928	1.82167	0.000190806	Mthfd1	methylenetetrahydrofolate dehydrogenase (NADP+ dependent), methenyltetrahydrofolate cyclohydrolase, formyltetrahydrofolate synthase	Mus musculus methylenetetrahydrofolate dehydrogenase (NADP+ dependent), methenyltetrahydrofolate cyclohydrolase, formyltetrahydrofolate synthase (Mthfd1), mRNA [NM_138745]	NM_138745	NM_138745	108156	chr12	77418622	77418681	+	37517	78	80	A_51_P392928	FALSE	Mm.29584	ENSMUST00000021443		ref|NM_138745|ens|ENSMUST00000021443|gb|AF364579|gb|AK129012	chr12:077418622-077418681	mm|12qC3	GO:0000105(histidine biosynthetic process)|GO:0000166(nucleotide binding)|GO:0001780(neutrophil homeostasis)|GO:0001843(neural tube closure)|GO:0003824(catalytic activity)|GO:0004329(formate-tetrahydrofolate ligase activity)|GO:0004477(methenyltetrahydrofolate cyclohydrolase activity)|GO:0004487(methylenetetrahydrofolate dehydrogenase (NAD+) activity)|GO:0004488(methylenetetrahydrofolate dehydrog…	GGCCCTGTTTTTATGATATTGATTTGGATCCTGAAACGGAACAAGTGAATGGATTGTTTT	4522	MTHFD1	0
A_55_P2003541	1.82147	8.77164e-05	Nrcam	neuronal cell adhesion molecule	Mus musculus neuronal cell adhesion molecule (Nrcam), transcript variant 1, mRNA [NM_176930]	NM_176930	NM_176930	319504	chr12	45699758	45699817	+	6814	172	149	A_55_P2003541	FALSE	Mm.208439	ENSMUST00000020939		ref|NM_176930|ref|NM_001146031|ens|ENSMUST00000020939|ens|ENSMUST00000110748	chr12:045699758-045699817	mm|12qB3	GO:0005515(protein binding)|GO:0005886(plasma membrane)|GO:0007155(cell adhesion)|GO:0007411(axon guidance)|GO:0007417(central nervous system development)|GO:0008104(protein localization)|GO:0010975(regulation of neuron projection development)|GO:0016020(membrane)|GO:0016021(integral to membrane)|GO:0016337(cell-cell adhesion)|GO:0019227(neuronal action potential propagation)|GO:0030424(axon)|GO:…	GCATACGTTTTTGTTCAGAGTGGGGTTTTTCTCAATTTCCTTGGAACTGATTAAAAAGAA	4897	NRCAM	0
A_55_P2009345	1.82123	0.0360312	Ovch2	ovochymase 2	Mus musculus ovochymase 2 (Ovch2), mRNA [NM_172908]	NM_172908	NM_172908	244199	chr7	114925117	114925058	-	19173	134	32	A_55_P2009345	FALSE	Mm.99576	ENSMUST00000106755		ref|NM_172908|ens|ENSMUST00000106755|gb|AK033776|tc|TC1590837	chr7:114925117-114925058	mm|7qE3	GO:0004252(serine-type endopeptidase activity)|GO:0005575(cellular_component)|GO:0005576(extracellular region)|GO:0006508(proteolysis)|GO:0008233(peptidase activity)|GO:0008236(serine-type peptidase activity)|GO:0016787(hydrolase activity)|GO:0046872(metal ion binding)	TGACACACTGGCCTTTGCCCTCTTTCCTCCAGAAATGTGAGACAATAAATCTCTGCTATT	341277	OVCH2	0
A_55_P1961562	1.82082	0.0873521	D030028A08Rik	RIKEN cDNA D030028A08 gene	Mus musculus 15 days embryo head cDNA, RIKEN full-length enriched library, clone:D930009C14 product:hypothetical protein, full insert sequence. [AK086164]		AK086164	319371	chr11	96820232	96820291	+	33435	91	43	A_55_P1961562	FALSE	Mm.436865			gb|AK086164|tc|TC1590665|riken|D930009C14|nap|NAP087173-1	chr11:96820232-96820291	mm|11qD	GO:0003674(molecular_function)|GO:0005575(cellular_component)|GO:0008150(biological_process)	AACTACATGTAAGGTGGACAGAGTCCTTAGGCAGCGTTGGAATTACTATCCGAAGCATGT			0
A_51_P155313	1.82042	6.11876e-07	Gsto1	glutathione S-transferase omega 1	Mus musculus glutathione S-transferase omega 1 (Gsto1), mRNA [NM_010362]	NM_010362	NM_010362	14873	chr19	47939128	47939187	+	25732	114	34	A_51_P155313	FALSE	Mm.378931	ENSMUST00000026050		ref|NM_010362|ens|ENSMUST00000026050|gb|U80819|gb|AK218498	chr19:047939128-047939187	mm|19qD1	GO:0004364(glutathione transferase activity)|GO:0005604(basement membrane)|GO:0005737(cytoplasm)|GO:0005829(cytosol)|GO:0008152(metabolic process)|GO:0010880(regulation of release of sequestered calcium ion into cytosol by sarcoplasmic reticulum)|GO:0016491(oxidoreductase activity)|GO:0016740(transferase activity)|GO:0019852(L-ascorbic acid metabolic process)|GO:0019853(L-ascorbic acid biosynthet…	CCATCCCCAAGGCCATCACCTCTGGTTTGATACAGGCATCTAGATTTGGATATCAAGAAA	9446	GSTO1	0
A_55_P2113964	1.81976	0.000585568	Nuf2	NUF2, NDC80 kinetochore complex component, homolog (S. cerevisiae)	Mus musculus colon RCB-0549 Cle-H3 cDNA, RIKEN full-length enriched library, clone:G430008M12 product:NUF2R homolog [Mus musculus], full insert sequence. [AK089939]		AK089939	66977	chr1	171440510	171440451	-	44730	56	86	A_55_P2113964	FALSE	Mm.151315			gb|AK089939|tc|TC1590557|riken|G430008M12|nap|NAP072413-1	chr1:171440510-171440451	mm|1qH3	GO:0000775(chromosome, centromeric region)|GO:0000776(kinetochore)|GO:0003674(molecular_function)|GO:0005634(nucleus)|GO:0005694(chromosome)|GO:0007049(cell cycle)|GO:0007067(mitosis)|GO:0008608(attachment of spindle microtubules to kinetochore)|GO:0016020(membrane)|GO:0031262(Ndc80 complex)|GO:0051301(cell division)	GCACTCTCTGAACTACTTAGTGTCTGTGCAGATTTCTCTCCTGAATTTCTATGCTCCTCT	83540	NUF2	0
A_55_P2081616	1.81784	0.00580306	Timeless	timeless circadian clock 1	Mus musculus timeless circadian clock 1 (Timeless), transcript variant 4, mRNA [NM_001164081]	NM_001164081	NM_001164081	21853	chr10	127689823	127689882	+	29406	103	229	A_55_P2081616	FALSE	Mm.6458			ref|NM_001164081|ref|NM_001136082|ref|NM_001164080|ref|NM_011589	chr10:127689823-127689882	mm|10qD3	GO:0000122(negative regulation of transcription from RNA polymerase II promoter)|GO:0000790(nuclear chromatin)|GO:0001658(branching involved in ureteric bud morphogenesis)|GO:0001822(kidney development)|GO:0005515(protein binding)|GO:0005634(nucleus)|GO:0005730(nucleolus)|GO:0006351(transcription, DNA-dependent)|GO:0006355(regulation of transcription, DNA-dependent)|GO:0006974(response to DNA dam…	ATTAAAAGACATGTCCTGAACTGAGCTTGGTAGTGTGAGCTAATCCCATCGTGTGGGAGA	8914	TIMELESS	0
A_55_P2072522	1.81587	0.000641398	Pcdhb16	protocadherin beta 16	Mus musculus protocadherin beta 16 (Pcdhb16), mRNA [NM_053141]	NM_053141	NM_053141	93887	chr18	37642126	37642185	+	40780	68	114	A_55_P2072522	FALSE	Mm.197441	ENSMUST00000051442		ref|NM_053141|ens|ENSMUST00000051442|gb|BC115720|gb|BC116625	chr18:037642126-037642185	mm|18qB3	GO:0007268(synaptic transmission)|GO:0007416(synapse assembly)|GO:0016021(integral to membrane)|GO:0016339(calcium-dependent cell-cell adhesion)|GO:0032391(photoreceptor connecting cilium)|GO:0045202(synapse)|GO:0045211(postsynaptic membrane)	ACTTTCTGGTGCAGTTAACCTTTTATCTTTGGCAAAATAATGCCCGTTGATGCCTTCTTT	56128	PCDHB8	0
A_55_P2028542	1.81568	0.000258427	Becn2	beclin 2	Mus musculus beclin 2 (Becn2), mRNA [NM_001290692]	NM_001290692	NM_001290692	226720	chr1	177852271	177852330	+	59907	10	235	A_55_P2028542	FALSE				ref|NM_001290692|tc|TC1657429|nap|NAP014422-001	chr1:177852271-177852330	mm|1qH4	GO:0005515(protein binding)|GO:0005622(intracellular)|GO:0005623(cell)|GO:0005737(cytoplasm)|GO:0006914(autophagy)|GO:0008333(endosome to lysosome transport)|GO:0032403(protein complex binding)|GO:0042593(glucose homeostasis)	GGACTGCGTTTCTGTTGTTGTATAGTATAAGCCTTTCCTTTTCATCTCTAAGATGATTTT	441925	BECN2	0
A_51_P518163	1.81491	0.000948994	Rrp9	RRP9, small subunit (SSU) processome component, homolog (yeast)	Mus musculus RRP9, small subunit (SSU) processome component, homolog (yeast) (Rrp9), mRNA [NM_145620]	NM_145620	NM_145620	27966	chr9	106386845	106387461	+	17527	139	44	A_51_P518163	FALSE	Mm.239997	ENSMUST00000125630		ref|NM_145620|ens|ENSMUST00000125630|ens|ENSMUST00000047721|gb|AF368232	unmapped		GO:0003723(RNA binding)|GO:0005634(nucleus)|GO:0005730(nucleolus)|GO:0006364(rRNA processing)|GO:0008150(biological_process)|GO:0030515(snoRNA binding)|GO:0030529(ribonucleoprotein complex)|GO:0031428(box C/D snoRNP complex)|GO:0032040(small-subunit processome)|GO:0034511(U3 snoRNA binding)	CCCCTGGTTGGTTTTATCAACAGCCTCAAGTTCTCCAGTGCTGGGGACTTCTTGGTGGCA	9136	RRP9	0
A_55_P2133767	1.81409	0.0128735	Usp36	ubiquitin specific peptidase 36	Mus musculus ubiquitin specific peptidase 36 (Usp36), mRNA [NM_001033528]	NM_001033528	NM_001033528	72344	chr11	118146304	118146245	-	41174	67	309	A_55_P2133767	FALSE	Mm.232293	ENSMUST00000151433		ref|NM_001033528|ens|ENSMUST00000151433|ens|ENSMUST00000092382|ref|XM_011249274	chr11:118146304-118146245	mm|11qE2	GO:0004197(cysteine-type endopeptidase activity)|GO:0004843(ubiquitin-specific protease activity)|GO:0005634(nucleus)|GO:0005730(nucleolus)|GO:0006508(proteolysis)|GO:0006511(ubiquitin-dependent protein catabolic process)|GO:0008233(peptidase activity)|GO:0008234(cysteine-type peptidase activity)|GO:0016579(protein deubiquitination)|GO:0016787(hydrolase activity)|GO:0043161(proteasomal ubiquitin-…	AACGTGTTTTCCGAGTTGGCGCAGGGCTGCACAACCTGGGTAACACCTGCTTCCTCAACT	57602	USP36	0
A_55_P2005838	1.81267	0.0144017	Ticrr	TOPBP1-interacting checkpoint and replication regulator	Mus musculus TOPBP1-interacting checkpoint and replication regulator (Ticrr), mRNA [NM_029835]	NM_029835	NM_029835	77011	chr7	86842944	86843003	+	33519	90	204	A_55_P2005838	FALSE	Mm.28132	ENSMUST00000035977		ref|NM_029835|ens|ENSMUST00000035977|gb|AK137597|gb|BC058634	chr7:086842944-086843003	mm|7qD3	GO:0003682(chromatin binding)|GO:0005634(nucleus)|GO:0005654(nucleoplasm)|GO:0006260(DNA replication)|GO:0006281(DNA repair)|GO:0006974(response to DNA damage stimulus)|GO:0007049(cell cycle)|GO:0010212(response to ionizing radiation)|GO:0030174(regulation of DNA-dependent DNA replication initiation)|GO:0033314(mitotic cell cycle DNA replication checkpoint)	CAGGAATTCTTGGGGGACATATTTAAGATGTAAGCCATAATGAGATTACTCCTGTTTATT	90381	TICRR	0
A_52_P582568	1.81236	0.000548157	Ust	uronyl-2-sulfotransferase	Mus musculus uronyl-2-sulfotransferase (Ust), mRNA [NM_177387]	NM_177387	NM_177387	338362	chr10	7924615	7924556	-	50647	38	60	A_52_P582568	FALSE	Mm.41163	ENSMUST00000061601		ref|NM_177387|ens|ENSMUST00000061601|gb|AK029782|tc|TC1601188	chr10:007924615-007924556	mm|10qA1	GO:0001517(N-acetylglucosamine 6-O-sulfotransferase activity)|GO:0001537(N-acetylgalactosamine 4-O-sulfotransferase activity)|GO:0004394(heparan sulfate 2-O-sulfotransferase activity)|GO:0005794(Golgi apparatus)|GO:0008146(sulfotransferase activity)|GO:0016020(membrane)|GO:0016021(integral to membrane)|GO:0016232(HNK-1 sulfotransferase activity)|GO:0016740(transferase activity)|GO:0017095(heparan…	AAATAAGTGGACCTTATTTTTTCTGTTATTTTGGTAGCTGGAAATTAAAGACTTCCTTTC	10090	UST	0
A_51_P340699	1.81231	0.0218447	Rasl11a	RAS-like, family 11, member A	Mus musculus RAS-like, family 11, member A (Rasl11a), mRNA [NM_026864]	NM_026864	NM_026864	68895	chr5	147658864	147658923	+	11511	157	268	A_51_P340699	FALSE	Mm.266978	ENSMUST00000031646		ref|NM_026864|ens|ENSMUST00000031646|gb|BC118009|gb|AK004371	chr5:147658864-147658923	mm|5qG3	GO:0000166(nucleotide binding)|GO:0005515(protein binding)|GO:0005525(GTP binding)|GO:0005634(nucleus)|GO:0005730(nucleolus)|GO:0006351(transcription, DNA-dependent)|GO:0006355(regulation of transcription, DNA-dependent)|GO:0007165(signal transduction)|GO:0007264(small GTPase mediated signal transduction)|GO:0016020(membrane)|GO:0045943(positive regulation of transcription from RNA polymerase I p…	ACTACGAAGACGTCTGTGATGTGTTCCAACATCTCTGCAAAGAAGTGATCAAGGTGCACA	387496	RASL11A	0
A_55_P2133165	1.81192	0.000641925	Wwc1	WW, C2 and coiled-coil domain containing 1	Mus musculus WW, C2 and coiled-coil domain containing 1 (Wwc1), mRNA [NM_170779]	NM_170779	NM_170779	211652	chr11	35652739	35652680	-	22064	125	154	A_55_P2133165	FALSE	Mm.31267	ENSMUST00000018993		ref|NM_170779|ens|ENSMUST00000018993|gb|DQ256090|gb|BC006733	chr11:035652739-035652680	mm|11qA4	GO:0000122(negative regulation of transcription from RNA polymerase II promoter)|GO:0003713(transcription coactivator activity)|GO:0005634(nucleus)|GO:0005737(cytoplasm)|GO:0005829(cytosol)|GO:0005886(plasma membrane)|GO:0006351(transcription, DNA-dependent)|GO:0006355(regulation of transcription, DNA-dependent)|GO:0016020(membrane)|GO:0016477(cell migration)|GO:0019900(kinase binding)|GO:0030674…	ATGGCATTTTTCACCCGGCCTCGGATGAACATCCCAGCTCTCTCTGCAGATGACGTCTAA	23286	WWC1	0
A_55_P2121205	1.81139	0.00387436	Nuggc	nuclear GTPase, germinal center associated	Mus musculus nuclear GTPase, germinal center associated (Nuggc), mRNA [NM_001195674]	NM_001195674	NM_001195674	100503545	chr14	66267169	66267228	+	37638	78	165	A_55_P2121205	FALSE	Mm.297364	ENSMUST00000079469		ref|NM_001195674|ens|ENSMUST00000079469|ref|XM_006518303|ref|XM_006518301	chr14:066267169-066267228	mm|14qD1	GO:0003674(molecular_function)|GO:0005634(nucleus)|GO:0006974(response to DNA damage stimulus)|GO:0016446(somatic hypermutation of immunoglobulin genes)	CTTTCGTCTAAAGAGATGAAAATAGGCCTGGAGCCAAATAACCAGAATTATTGCTATTTT	389643	NUGGC	0
A_55_P2124976	1.81043	4.69423e-05	Grhl1	grainyhead-like 1 (Drosophila)	Mus musculus grainyhead-like 1 (Drosophila) (Grhl1), transcript variant 2, mRNA [NM_145890]	NM_145890	NM_145890	195733	chr12	25302095	25302154	+	58980	13	121	A_55_P2124976	FALSE	Mm.263068	ENSMUST00000085553		ref|NM_145890|ref|NM_001161406|ens|ENSMUST00000085553|ens|ENSMUST00000020985	chr12:025302095-025302154	mm|12qA1.3	GO:0000978(RNA polymerase II core promoter proximal region sequence-specific DNA binding)|GO:0001077(RNA polymerase II core promoter proximal region sequence-specific DNA binding transcription factor activity involved in positive regulation of transcription)|GO:0003677(DNA binding)|GO:0003700(sequence-specific DNA binding transcription factor activity)|GO:0005634(nucleus)|GO:0005654(nucleoplasm)|…	GAAGTATGTGAACAAAATAGCTGGTTTTCTAAGATACGGGATACGGGTCATATAACAATA	29841	GRHL1	0
A_55_P2029420	1.80949	4.24586e-05	2610318N02Rik	RIKEN cDNA 2610318N02 gene	Mus musculus RIKEN cDNA 2610318N02 gene (2610318N02Rik), mRNA [NM_183287]	NM_183287	NM_183287	70458	chr16	17113551	17113492	-	43781	59	16	A_55_P2029420	FALSE	Mm.234165	ENSMUST00000093336		ref|NM_183287|ens|ENSMUST00000093336|ref|XM_006522539|ref|XM_006522540	chr16:017113551-017113492	mm|16qA3	GO:0003674(molecular_function)|GO:0005575(cellular_component)|GO:0008150(biological_process)	CCAGTAATCTCTTCCCAACAGACCATGCCCCAGGACTGAATAAAGTTCATCCTGGTGTTG			0
A_55_P2185068	1.80908	0.00849492	Gm3002	alpha-takusan pseudogene	Mus musculus predicted gene 3002 (Gm3002), non-coding RNA [NR_033388]	NR_033388	NR_033388	100040852	chr14	3930876	3930935	+	58103	15	236	A_55_P2185068	FALSE	Mm.483675			ref|NR_033388|gb|BC096548|gb|BC089308|gb|BC080297	chr14:3930876-3930935	mm|14qA1		CCCTGGTCATGTCATGTGGTGAGGACTCAGACACATTGGATTTGAAGACACACAATTAAT			0
A_55_P1954365	1.80847	2.6099e-05	Ttc28	tetratricopeptide repeat domain 28	Mus musculus tetratricopeptide repeat domain 28 (Ttc28), mRNA [NM_001267622]	NM_001267622	NM_001267622	209683	chr5	111718740	111718799	+	18979	135	91	A_55_P1954365	FALSE	Mm.295660	ENSMUST00000040111		ref|NM_001267622|ens|ENSMUST00000040111|ens|ENSMUST00000156290|gb|AK172165	chr5:111718740-111718799	mm|5qF	GO:0003674(molecular_function)|GO:0005737(cytoplasm)|GO:0005813(centrosome)|GO:0005856(cytoskeleton)|GO:0007049(cell cycle)|GO:0007067(mitosis)|GO:0007346(regulation of mitotic cell cycle)|GO:0030496(midbody)|GO:0051301(cell division)|GO:0072686(mitotic spindle)	GGCGCTTGGCCCTTCCTTTGTGATTCAGTGTCTATTAAAGCATGAGCCTGTCAGTTTTAA	23331	TTC28	0
A_55_P2136935	1.80699	0.00453582	Rgs7bp	regulator of G-protein signalling 7 binding protein	Mus musculus regulator of G-protein signalling 7 binding protein (Rgs7bp), mRNA [NM_029879]	NM_029879	NM_029879	52882	chr13	105741432	105741373	-	31772	96	89	A_55_P2136935	FALSE	Mm.100348	ENSMUST00000063551		ref|NM_029879|ens|ENSMUST00000063551|ref|XM_006517722|gb|AK032138	chr13:105741432-105741373	mm|13qD1	GO:0005515(protein binding)|GO:0005634(nucleus)|GO:0005737(cytoplasm)|GO:0005886(plasma membrane)|GO:0007186(G-protein coupled receptor signaling pathway)|GO:0009968(negative regulation of signal transduction)|GO:0016020(membrane)	CCATTTTAAATGATTTCACACTTGAAAGCAGCTGCCATCAAGGAAAAGAGAAAGAAAGAA	401190	RGS7BP	0
A_52_P565575	1.80607	0.0272762	Arhgap20	Rho GTPase activating protein 20	Mus musculus Rho GTPase activating protein 20 (Arhgap20), mRNA [NM_175535]	NM_175535	NM_175535	244867	chr9	51660224	51660283	+	15526	145	110	A_52_P565575	FALSE	Mm.443529			ref|NM_175535|gb|AK132879|gb|BC027009|gb|AK032918	chr9:051660224-051660283	mm|9qA5.3	GO:0003674(molecular_function)|GO:0005096(GTPase activator activity)|GO:0007165(signal transduction)	GAGCTACTCCCCTAGTCCAAAAGTTTCCTAAAGTCTATGTGATCTCTTGAATCCCTGTTT	57569	ARHGAP20	0
A_52_P589391	1.80474	3.72787e-05	Doc2a	double C2, alpha	Mus musculus double C2, alpha (Doc2a), mRNA [NM_010069]	NM_010069	NM_010069	13446	chr7	133995963	133996022	+	29982	101	62	A_52_P589391	FALSE	Mm.266301	ENSMUST00000064110		ref|NM_010069|ens|ENSMUST00000064110|ref|XM_006507321|ref|XM_006507324	chr7:133995963-133996022	mm|7qF3	GO:0005509(calcium ion binding)|GO:0005544(calcium-dependent phospholipid binding)|GO:0005764(lysosome)|GO:0005886(plasma membrane)|GO:0006887(exocytosis)|GO:0007268(synaptic transmission)|GO:0016020(membrane)|GO:0016079(synaptic vesicle exocytosis)|GO:0017158(regulation of calcium ion-dependent exocytosis)|GO:0019905(syntaxin binding)|GO:0030054(cell junction)|GO:0030276(clathrin binding)|GO:003…	TAATACAGAGCCTTCACTAAATCCCAGCCCTGCGTAGCTGCTCTTCTAAAGGGGCGGCCA	8448	DOC2A	0
A_51_P218774	1.80184	0.0213398	Rgs10	regulator of G-protein signalling 10	Mus musculus regulator of G-protein signalling 10 (Rgs10), mRNA [NM_026418]	NM_026418	NM_026418	67865	chr7	135517315	135517256	-	30256	100	170	A_51_P218774	FALSE	Mm.18635	ENSMUST00000033133		ref|NM_026418|ens|ENSMUST00000033133|ref|XM_006508139|ref|XM_006508140	chr7:135517315-135517256	mm|7qF3	GO:0005096(GTPase activator activity)|GO:0005515(protein binding)|GO:0005634(nucleus)|GO:0005737(cytoplasm)|GO:0005886(plasma membrane)|GO:0009968(negative regulation of signal transduction)|GO:0038032(termination of G-protein coupled receptor signaling pathway)|GO:0043025(neuronal cell body)|GO:0043197(dendritic spine)|GO:0043547(positive regulation of GTPase activity)|GO:0043679(axon terminus)	GACCTTCCCTCTGGATATGTGTATTTTATTAACTGAACAGCAACCTCTGCATGATGCTAA	6001	RGS10	0
A_51_P377376	1.80045	7.53414e-06	Gnl3	guanine nucleotide binding protein-like 3 (nucleolar)	Mus musculus guanine nucleotide binding protein-like 3 (nucleolar) (Gnl3), transcript variant 1, mRNA [NM_153547]	NM_153547	NM_153547	30877	chr14	31826936	31826877	-	6442	173	237	A_51_P377376	FALSE	Mm.88512	ENSMUST00000037739		ref|NM_153547|ref|NR_104298|ens|ENSMUST00000037739|ref|XM_006519113	chr14:031826936-031826877	mm|14qB	GO:0000166(nucleotide binding)|GO:0003924(GTPase activity)|GO:0005515(protein binding)|GO:0005525(GTP binding)|GO:0005615(extracellular space)|GO:0005634(nucleus)|GO:0005654(nucleoplasm)|GO:0005730(nucleolus)|GO:0008283(cell proliferation)|GO:0016020(membrane)|GO:0042127(regulation of cell proliferation)|GO:0042254(ribosome biogenesis)	TTTTTTACTAAACTTGCTCAAAGAAGAGGTCTGCACCAAAAAGGTGGAAGCCCAAATGTG	26354	GNL3	0
A_52_P381430	1.80034	0.000244926	Tbc1d4	TBC1 domain family, member 4	Mus musculus TBC1 domain family, member 4 (Tbc1d4), mRNA [NM_001081278]	NM_001081278	NM_001081278	210789	chr14	101878414	101878355	-	57442	17	246	A_52_P381430	FALSE	Mm.320639	ENSMUST00000159664		ref|NM_001081278|ens|ENSMUST00000159664|ens|ENSMUST00000159668|ens|ENSMUST00000159484	chr14:101878414-101878355	mm|14qE2.3	GO:0005096(GTPase activator activity)|GO:0005515(protein binding)|GO:0005737(cytoplasm)|GO:0016192(vesicle-mediated transport)|GO:0031339(negative regulation of vesicle fusion)|GO:0031988(membrane-bounded vesicle)|GO:0032869(cellular response to insulin stimulus)|GO:0070062(extracellular vesicular exosome)	CAGGATGAGAGGTCGGCTTGGAAGTATGGACAGCTTTGAACGCGCCAACAGTCTTGCCTC	9882	TBC1D4	0
A_55_P2092310	1.79799	0.0350717	Phgdh	3-phosphoglycerate dehydrogenase	Mus musculus cDNA, clone:Y1G0118H07, strand:plus, reference:ENSEMBL:Mouse-Transcript-ENST:ENSMUST00000061100, based on BLAT search. [AK195427]		AK195427	236539	chr3	98117094	98117083	-	621	191	71	A_55_P2092310	FALSE	Mm.371997			gb|AK195427	chr17:053337968-053338027	mm|17qC	GO:0004617(phosphoglycerate dehydrogenase activity)|GO:0006541(glutamine metabolic process)|GO:0006544(glycine metabolic process)|GO:0006563(L-serine metabolic process)|GO:0006564(L-serine biosynthetic process)|GO:0006566(threonine metabolic process)|GO:0008152(metabolic process)|GO:0008652(cellular amino acid biosynthetic process)|GO:0009448(gamma-aminobutyric acid metabolic process)|GO:0010468(…	GGATCGCAGAACCAGGGCATCTGCCTGAACTAATAGCTAGTAAAGAACCTTACCTCCAAA	26227	PHGDH	0
A_52_P356228	1.79771	0.0132325	Slc38a9	solute carrier family 38, member 9	Mus musculus solute carrier family 38, member 9 (Slc38a9), mRNA [NM_178746]	NM_178746	NM_178746	268706	chr13	113524569	113524628	+	3815	181	243	A_52_P356228	FALSE	Mm.40834	ENSMUST00000052514		ref|NM_178746|ens|ENSMUST00000052514|ref|XM_006517671|ref|XM_011244666	chr13:113524569-113524628	mm|13qD2.2	GO:0003333(amino acid transmembrane transport)|GO:0005764(lysosome)|GO:0005768(endosome)|GO:0005770(late endosome)|GO:0006810(transport)|GO:0006865(amino acid transport)|GO:0015171(amino acid transmembrane transporter activity)|GO:0016020(membrane)|GO:0016021(integral to membrane)|GO:0032008(positive regulation of TOR signaling cascade)|GO:0071230(cellular response to amino acid stimulus)|GO:0071…	GGAAGAGGCTGTTTTAAAGGGAAATGCTTCGTCTACATTAAATGTGTCTCAGAAGTGCAG	153129	SLC38A9	0
A_55_P2078670	1.79636	0.0363831	Cbs	cystathionine beta-synthase	Mus musculus cystathionine beta-synthase (Cbs), transcript variant 1, mRNA [NM_144855]	NM_144855	NM_144855	12411	chr17	31749652	31749593	-	6763	172	251	A_55_P2078670	FALSE	Mm.206417	ENSMUST00000078509		ref|NM_144855|ref|NM_178224|ref|NM_001271353|ens|ENSMUST00000078509	chr17:031749652-031749593	mm|17qB1	GO:0001958(endochondral ossification)|GO:0001974(blood vessel remodeling)|GO:0004122(cystathionine beta-synthase activity)|GO:0005634(nucleus)|GO:0005730(nucleolus)|GO:0005737(cytoplasm)|GO:0005829(cytosol)|GO:0006535(cysteine biosynthetic process from serine)|GO:0006801(superoxide metabolic process)|GO:0008652(cellular amino acid biosynthetic process)|GO:0016829(lyase activity)|GO:0019343(cystei…	GCACCCACTTTCTGTCTCAATGGATCTCCCTGTTCTGGACTCTTCCTATAAATGGAATCA	875	CBS	0
A_66_P125327	1.79545	0.0054761	Ccne1	cyclin E1	Mus musculus cyclin E1 (Ccne1), mRNA [NM_007633]	NM_007633	NM_007633	12447	chr7	38885633	38885574	-	12078	156	117	A_66_P125327	FALSE	Mm.16110	ENSMUST00000108023		ref|NM_007633|ens|ENSMUST00000108023|gb|BC138660|gb|BC138662	chr7:038885633-038885574	mm|7qB2	GO:0000082(G1/S transition of mitotic cell cycle)|GO:0000307(cyclin-dependent protein kinase holoenzyme complex)|GO:0005515(protein binding)|GO:0005634(nucleus)|GO:0005654(nucleoplasm)|GO:0005737(cytoplasm)|GO:0005813(centrosome)|GO:0006270(DNA-dependent DNA replication initiation)|GO:0006468(protein phosphorylation)|GO:0007049(cell cycle)|GO:0016055(Wnt receptor signaling pathway)|GO:0016301(kin…	ATAAAAACACTTTTACAGCTTATTGGGATTTCAGCCTTATTTATTGCTTCAAAACTTGAG	898	CCNE1	0
A_66_P131979	1.79501	0.000320811	Cdc6	cell division cycle 6	Mus musculus cell division cycle 6 (Cdc6), transcript variant 1, mRNA [NM_011799]	NM_011799	NM_011799	23834	chr11	98782986	98783045	+	9457	164	111	A_66_P131979	FALSE	Mm.20912	ENSMUST00000093937		ref|NM_011799|ref|NM_001025779|ens|ENSMUST00000093937|ens|ENSMUST00000092706	chr11:098782986-098783045	mm|11qD	GO:0000166(nucleotide binding)|GO:0000922(spindle pole)|GO:0003682(chromatin binding)|GO:0005524(ATP binding)|GO:0005634(nucleus)|GO:0005654(nucleoplasm)|GO:0005737(cytoplasm)|GO:0005794(Golgi apparatus)|GO:0005819(spindle)|GO:0006260(DNA replication)|GO:0007049(cell cycle)|GO:0007067(mitosis)|GO:0019900(kinase binding)|GO:0030071(regulation of mitotic metaphase/anaphase transition)|GO:0032467(po…	TGTAAAGAACTTTGAAGTTTAGAAGGATGAAATGGAATGATCCAGGAAAATTTACGAGCC	990	CDC6	0
A_55_P2046262	1.79451	0.0270153	Phgdh	3-phosphoglycerate dehydrogenase	Mus musculus 3-phosphoglycerate dehydrogenase (Phgdh), mRNA [NM_016966]	NM_016966	NM_016966	236539	chr3	98117274	98117215	-	4730	178	54	A_55_P2046262	FALSE	Mm.16898	ENSMUST00000065793		ref|NM_016966|ref|NR_033590|ens|ENSMUST00000065793|gb|AK207713	chr3:098117274-098117215	mm|3qF2.2	GO:0004617(phosphoglycerate dehydrogenase activity)|GO:0006541(glutamine metabolic process)|GO:0006544(glycine metabolic process)|GO:0006563(L-serine metabolic process)|GO:0006564(L-serine biosynthetic process)|GO:0006566(threonine metabolic process)|GO:0008152(metabolic process)|GO:0008652(cellular amino acid biosynthetic process)|GO:0009448(gamma-aminobutyric acid metabolic process)|GO:0010468(…	GGAAACATGGAAGCAGCATGTATTGGAGGCTTTCCAGTTCTGCTTCTGACCCTGGGGTTC	26227	PHGDH	0
A_55_P1959828	1.79359	0.0237403	Slc35g1	solute carrier family 35, member G1	Mus musculus solute carrier family 35, member G1 (Slc35g1), mRNA [NM_175507]	NM_175507	NM_175507	240660	chr19	38479940	38479999	+	24649	117	232	A_55_P1959828	FALSE	Mm.262085	ENSMUST00000054098		ref|NM_175507|ens|ENSMUST00000054098|gb|AK052365|gb|AK171987	chr19:038479940-038479999	mm|19qC3	GO:0003674(molecular_function)|GO:0005783(endoplasmic reticulum)|GO:0005789(endoplasmic reticulum membrane)|GO:0005829(cytosol)|GO:0005886(plasma membrane)|GO:0016020(membrane)|GO:0016021(integral to membrane)|GO:0051480(cytosolic calcium ion homeostasis)	GTGGTATACAAGGCTATGTATTGTAACAATTACGGGGGTTTATGTATTTTCCAAAGATTG	159371	SLC35G1	0
A_55_P1954276	1.79359	0.00545107	Emid1	EMI domain containing 1	Mus musculus EMI domain containing 1 (Emid1), mRNA [NM_080595]	NM_080595	NM_080595	140703	chr11	5010753	5010694	-	40819	68	36	A_55_P1954276	FALSE	Mm.840	ENSMUST00000163299		ref|NM_080595|ens|ENSMUST00000163299|ens|ENSMUST00000062821|ref|XM_011243663	chr11:005010753-005010694	mm|11qA1	GO:0005515(protein binding)|GO:0005576(extracellular region)|GO:0005578(proteinaceous extracellular matrix)|GO:0005581(collagen)|GO:0005783(endoplasmic reticulum)|GO:0005794(Golgi apparatus)|GO:0008150(biological_process)	GAGGCTTTGAAGATTTTAGCTGAGAGGGTTTTAATCTTGGAAACAATGATTGGGCTCTAT	129080	EMID1	0
A_55_P2143041	1.7935	0.0298754	Phgdh	3-phosphoglycerate dehydrogenase	Mus musculus 3-phosphoglycerate dehydrogenase (Phgdh), mRNA [NM_016966]	NM_016966	NM_016966	236539	chr3	98117361	98117303	-	41970	65	29	A_55_P2143041	FALSE	Mm.16898	ENSMUST00000065793		ref|NM_016966|ref|NR_033590|ens|ENSMUST00000065793|gb|AK015074	chr8:029193931-029193872	mm|8qA2	GO:0004617(phosphoglycerate dehydrogenase activity)|GO:0006541(glutamine metabolic process)|GO:0006544(glycine metabolic process)|GO:0006563(L-serine metabolic process)|GO:0006564(L-serine biosynthetic process)|GO:0006566(threonine metabolic process)|GO:0008152(metabolic process)|GO:0008652(cellular amino acid biosynthetic process)|GO:0009448(gamma-aminobutyric acid metabolic process)|GO:0010468(…	TGTACAGCTGCTGTCCTACCAAACCTCCATGTTGTTTGACGGAGAGCCCTGGCACGTCAC	26227	PHGDH	0
A_52_P17982	1.79274	1.63585e-05	B3gat1	beta-1,3-glucuronyltransferase 1 (glucuronosyltransferase P)	Mus musculus beta-1,3-glucuronyltransferase 1 (glucuronosyltransferase P) (B3gat1), mRNA [NM_029792]	NM_029792	NM_029792	76898	chr9	26568549	26568608	+	3675	181	196	A_52_P17982	FALSE	Mm.218788	ENSMUST00000161115		ref|NM_029792|ens|ENSMUST00000161115|ref|XM_006510674|ref|XM_006510673	chr9:026568549-026568608	mm|9qA4	GO:0005794(Golgi apparatus)|GO:0008499(UDP-galactose:beta-N-acetylglucosamine beta-1,3-galactosyltransferase activity)|GO:0015018(galactosylgalactosylxylosylprotein 3-beta-glucuronosyltransferase activity)|GO:0015020(glucuronosyltransferase activity)|GO:0016020(membrane)|GO:0016021(integral to membrane)|GO:0016740(transferase activity)|GO:0046872(metal ion binding)	ATGGGGATTTTTACTTTTCACGTTTTGGCAGATGCTACTTCAGTTGTTTTCATGTAATGT	27087	B3GAT1	0
A_55_P2001891	1.79116	0.000241252	Prps1	phosphoribosyl pyrophosphate synthetase 1	Mus musculus phosphoribosyl pyrophosphate synthetase 1 (Prps1), mRNA [NM_021463]	NM_021463	NM_021463	19139	chrX	137010609	137010668	+	8523	167	11	A_55_P2001891	FALSE	Mm.287178	ENSMUST00000033809		ref|NM_021463|ens|ENSMUST00000033809|gb|AK165524|gb|AB025048	chrX:137010609-137010668	mm|XqF1	GO:0000166(nucleotide binding)|GO:0000287(magnesium ion binding)|GO:0002189(ribose phosphate diphosphokinase complex)|GO:0004749(ribose phosphate diphosphokinase activity)|GO:0005524(ATP binding)|GO:0006015(5-phosphoribose 1-diphosphate biosynthetic process)|GO:0006144(purine base metabolic process)|GO:0006164(purine nucleotide biosynthetic process)|GO:0006167(AMP biosynthetic process)|GO:0007399…	CCGTTTGGCCTCTCAATTGAACTTACTGTATTGTGTAGAAGAAACTTAATAAAATGTCTG			0
A_55_P2064776	1.79106	0.0040567	4930412O13Rik	RIKEN cDNA 4930412O13 gene	Mus musculus RIKEN cDNA 4930412O13 gene (4930412O13Rik), long non-coding RNA [NR_024257]	NR_024257	NR_024257	381347	chr2	9808308	9808367	+	47707	47	36	A_55_P2064776	FALSE	Mm.441450			ref|NR_024257|gb|AK144308|riken|G630014M05	chr2:9808308-9808367	mm|2qA1	GO:0003674(molecular_function)|GO:0005575(cellular_component)|GO:0008150(biological_process)	GATGGAATCACACCTGTCAGTTTGTTACCCTGCTCTATTAAAGAAATCGCCTTTAAAAAA			0
A_55_P2081525	1.79038	0.00796396	Olfr1200	olfactory receptor 1200	Mus musculus olfactory receptor 1200 (Olfr1200), mRNA [NM_001005227]	NM_001005227	NM_001005227	257887	chr2	88607519	88607460	-	37192	79	74	A_55_P2081525	FALSE	Mm.377285	ENSMUST00000099811		ref|NM_001005227|ens|ENSMUST00000099811|tc|NP1392109|nap|NAP112956-1	chr2:088607519-088607460	mm|2qE1	GO:0004888(transmembrane signaling receptor activity)|GO:0004984(olfactory receptor activity)|GO:0007186(G-protein coupled receptor signaling pathway)|GO:0007608(sensory perception of smell)|GO:0016021(integral to membrane)|GO:0050907(detection of chemical stimulus involved in sensory perception)|GO:0050911(detection of chemical stimulus involved in sensory perception of smell)	GCTCTGATGTTCCTAGGTCAGCTACTATCCAACAGGTCACAGAAAGTACAAACAATTTAG			0
A_55_P2150962	1.78997	0.000447133	Cpne7	copine VII	Mus musculus copine VII (Cpne7), mRNA [NM_170684]	NM_170684	NM_170684	102278	chr8	125659024	125659083	+	23853	120	183	A_55_P2150962	FALSE	Mm.36434	ENSMUST00000131659		ref|NM_170684|ens|ENSMUST00000131659|ens|ENSMUST00000037900|ens|ENSMUST00000134235	chr8:125659024-125659083	mm|8qE1	GO:0003674(molecular_function)|GO:0005634(nucleus)|GO:0005737(cytoplasm)|GO:0005886(plasma membrane)|GO:0070062(extracellular vesicular exosome)|GO:0071277(cellular response to calcium ion)	CCTGGAGCCTGCGGGGCCTGGGAGACAGCTTAGGGTGTAATAAAGTATCCCTCATTCTCA	27132	CPNE7	0
A_55_P2252896	1.78992	0.00129705	B230104C14Rik	RIKEN cDNA B230104C14 gene	Mus musculus adult male corpora quadrigemina cDNA, RIKEN full-length enriched library, clone:B230104C14 product:unclassifiable, full insert sequence. [AK020954]		AK020954	77979	chr2	76227469	76227528	+	14680	148	161	A_55_P2252896	FALSE	Mm.122932			gb|AK020954|tc|TC1650229|riken|B230104C14|nap|NAP076519-1	chr2:76227469-76227528	mm|2qC3		CTGTAAAGAGAATTAAAGTTGTCTACTCCAGTGTCGCTTACCAATTAAAGAAAAGATGTG			0
A_52_P182298	1.78925	2.54274e-05	Rln1	relaxin 1	Mus musculus relaxin 1 (Rln1), mRNA [NM_011272]	NM_011272	NM_011272	19773	chr19	29406369	29406310	-	26398	112	14	A_52_P182298	FALSE	Mm.5033	ENSMUST00000044143		ref|NM_011272|ens|ENSMUST00000044143|ens|ENSMUST00000182039|gb|BC132654	chr19:029406369-029406310	mm|19qC1	GO:0005102(receptor binding)|GO:0005179(hormone activity)|GO:0005576(extracellular region)|GO:0007188(adenylate cyclase-modulating G-protein coupled receptor signaling pathway)|GO:0010749(regulation of nitric oxide mediated signal transduction)|GO:0042127(regulation of cell proliferation)|GO:0043066(negative regulation of apoptotic process)|GO:0048589(developmental growth)|GO:0060736(prostate gla…	AGCCAGCAATGTTGCCACGTCGGTTGTAGCAGAAGATCTATTGCTAAACTCTATTGCTGA	6019	RLN2	0
A_51_P425962	1.78881	0.000950274	Khdrbs3	KH domain containing, RNA binding, signal transduction associated 3	Mus musculus KH domain containing, RNA binding, signal transduction associated 3 (Khdrbs3), mRNA [NM_010158]	NM_010158	NM_010158	13992	chr15	68923876	68923935	+	58319	15	131	A_51_P425962	FALSE	Mm.17964	ENSMUST00000022954		ref|NM_010158|ens|ENSMUST00000022954|ref|XM_006520410|gb|AF099092	chr15:068923876-068923935	mm|15qD3	GO:0003676(nucleic acid binding)|GO:0003723(RNA binding)|GO:0003727(single-stranded RNA binding)|GO:0005634(nucleus)|GO:0005654(nucleoplasm)|GO:0006351(transcription, DNA-dependent)|GO:0006355(regulation of transcription, DNA-dependent)|GO:0006397(mRNA processing)|GO:0017124(SH3 domain binding)|GO:0033120(positive regulation of RNA splicing)	CTGAGTCCTGAAATGTTCTGTAGTGTTAGGCAAAGTCTCCTCTTGCTTGATACTAAATAA	10656	KHDRBS3	0
A_55_P2144526	1.78596	0.00494388	Fam65b	family with sequence similarity 65, member B	Mus musculus family with sequence similarity 65, member B (Fam65b), transcript variant 2, mRNA [NM_001080381]	NM_001080381	NM_001080381	193385	chr13	24793538	24793597	+	15987	144	171	A_55_P2144526	FALSE	Mm.217319	ENSMUST00000134370		ref|NM_001080381|ref|NM_001286101|ref|NM_178658|ens|ENSMUST00000134370	chr13:024793538-024793597	mm|13qA3.1	GO:0005515(protein binding)|GO:0005737(cytoplasm)|GO:0005886(plasma membrane)|GO:0007605(sensory perception of sound)|GO:0016020(membrane)|GO:0016324(apical plasma membrane)|GO:0042995(cell projection)|GO:0060171(stereocilium membrane)	AGCAGTACAAAGAGTTCCAGGATCTGAACCAAGAAGTCACTCACTTGGATGATGTTCTCA	9750		0
A_52_P29953	1.78526	0.00451544	Fam212b	family with sequence similarity 212, member B	Mus musculus family with sequence similarity 212, member B (Fam212b), transcript variant 1, mRNA [NM_175398]	NM_175398	NM_175398	109050	chr3	105521608	105521667	+	34806	86	254	A_52_P29953	FALSE	Mm.212591	ENSMUST00000066610		ref|NM_175398|ref|NM_001163356|ens|ENSMUST00000066610|ref|XM_006500859	chr3:105521608-105521667	mm|3qF2.2	GO:0003674(molecular_function)|GO:0005575(cellular_component)|GO:0008150(biological_process)	AAATCTGTAGCTTTTTGCTAGGCAATGTACCTATCTCAGAACGATTAATCAATGGGGTCA	55924	FAM212B	0
A_55_P2034230	1.78511	2.96018e-05	Polr2c	polymerase (RNA) II (DNA directed) polypeptide C	Mus musculus polymerase (RNA) II (DNA directed) polypeptide C (Polr2c), mRNA [NM_009090]	NM_009090	NM_009090	20021	chr8	97387744	97387803	+	28316	106	114	A_55_P2034230	FALSE	Mm.292492	ENSMUST00000109521		ref|NM_009090|ens|ENSMUST00000109521|gb|AK160053|gb|AK146763	chr11:009049533-009049474	mm|11qA1	GO:0001055(RNA polymerase II activity)|GO:0003677(DNA binding)|GO:0003899(DNA-directed RNA polymerase activity)|GO:0005515(protein binding)|GO:0005634(nucleus)|GO:0005654(nucleoplasm)|GO:0005665(DNA-directed RNA polymerase II, core complex)|GO:0005737(cytoplasm)|GO:0006351(transcription, DNA-dependent)|GO:0006366(transcription from RNA polymerase II promoter)|GO:0015630(microtubule cytoskeleton)|…	TATTGATCAACAGTAGTTGTCTTTTTAAAAGTTTTTATTTTTGGCAATAAAGAGCACAAC	5432	POLR2C	0
A_55_P2092668	1.78456	0.015768	Ccbl2	cysteine conjugate-beta lyase 2	Mus musculus cysteine conjugate-beta lyase 2 (Ccbl2), transcript variant 2, mRNA [NM_173763]	NM_173763	NM_173763	229905	chr3	142407815	142407874	+	26675	111	116	A_55_P2092668	FALSE	Mm.289643	ENSMUST00000044392		ref|NM_173763|ref|NM_001293560|ens|ENSMUST00000044392|gb|AK049569	chr3:142407815-142407874	mm|3qH1	GO:0003824(catalytic activity)|GO:0005739(mitochondrion)|GO:0006103(2-oxoglutarate metabolic process)|GO:0006520(cellular amino acid metabolic process)|GO:0008483(transaminase activity)|GO:0009058(biosynthetic process)|GO:0016212(kynurenine-oxoglutarate transaminase activity)|GO:0016740(transferase activity)|GO:0016829(lyase activity)|GO:0030170(pyridoxal phosphate binding)|GO:0042803(protein hom…	GAAACTATCATCAGTCGGGGCCGTTTCACCTTTGAGATAGTAAACACATCCTCTCTATAT	56267	KYAT3	0
A_55_P2109227	1.78359	0.000297205	Glt1d1	glycosyltransferase 1 domain containing 1	Mus musculus glycosyltransferase 1 domain containing 1 (Glt1d1), mRNA [NM_177005]	NM_177005	NM_177005	319804	chr5	128187822	128187881	+	62898	1	157	A_55_P2109227	FALSE	Mm.237888			ref|NM_177005|gb|AK077577|tc|TC1606590|riken|5730455A04	chr5:128187822-128187881	mm|5qG1.2	GO:0003674(molecular_function)|GO:0005576(extracellular region)|GO:0005737(cytoplasm)|GO:0008150(biological_process)|GO:0009058(biosynthetic process)|GO:0016740(transferase activity)|GO:0016757(transferase activity, transferring glycosyl groups)	ATGGAGTGGAGCTGGCAGCATTTTTGATATGATCTTGATCAACAAGCCATCATGGGACAG	144423	GLT1D1	0
A_52_P468378	1.78307	0.00093698	Pdxk-ps	pyridoxal (pyridoxine, vitamin B6) kinase, pseudogene	Mus musculus pyridoxal (pyridoxine, vitamin B6) kinase, pseudogene (Pdxk-ps), non-coding RNA [NR_027316]	NR_027316	NR_027316	435518	chr17	32215737	32213935	-	30966	98	62	A_52_P468378	FALSE	Mm.328944	ENSMUST00000160550		ref|NR_027316|ens|ENSMUST00000160550|ens|ENSMUST00000159650|gb|AK138248	chr17:32215737-32213935	mm|17qB1		CACAAACACCCAGACAATCTCAAGGTGGCCTGTGAGAAAACAGTGTCTGCTGTGCAGCAC			0
A_51_P494125	1.78291	0.00357684	Alpl	alkaline phosphatase, liver/bone/kidney	Mus musculus alkaline phosphatase, liver/bone/kidney (Alpl), transcript variant 1, mRNA [NM_007431]	NM_007431	NM_007431	11647	chr4	137297716	137297658	-	7371	170	20	A_51_P494125	FALSE	Mm.288186	ENSMUST00000030551		ref|NM_007431|ref|NM_001287176|ref|NM_001287172|ens|ENSMUST00000030551	chr4:137297716-137297658	mm|4qD3	GO:0001649(osteoblast differentiation)|GO:0001958(endochondral ossification)|GO:0003006(developmental process involved in reproduction)|GO:0003824(catalytic activity)|GO:0004035(alkaline phosphatase activity)|GO:0005515(protein binding)|GO:0005578(proteinaceous extracellular matrix)|GO:0005615(extracellular space)|GO:0005886(plasma membrane)|GO:0008152(metabolic process)|GO:0016020(membrane)|GO:0…	CCTCTTTTTGGTGTTGGTTAAAAGGGAACACAAGACATTTAAATAAAACATCCCAAATAT	249	ALPL	0
A_55_P2365897	1.78237	0.00402564	Dut	deoxyuridine triphosphatase	Mus musculus 2 days neonate thymus thymic cells cDNA, RIKEN full-length enriched library, clone:E430022E24 product:deoxyuridine triphosphatase, full insert sequence. [AK169782]		AK169782	110074	chr2	125076347	125076406	+	4942	177	286	A_55_P2365897	FALSE	Mm.282499			gb|AK169782|riken|E430022E24|nap|NAP125336-1	chr2:125076347-125076406	mm|2qF1	GO:0000287(magnesium ion binding)|GO:0004170(dUTP diphosphatase activity)|GO:0005634(nucleus)|GO:0005654(nucleoplasm)|GO:0005737(cytoplasm)|GO:0005739(mitochondrion)|GO:0005829(cytosol)|GO:0006226(dUMP biosynthetic process)|GO:0030547(receptor inhibitor activity)|GO:0032556(pyrimidine deoxyribonucleotide binding)|GO:0042975(peroxisome proliferator activated receptor binding)|GO:0043497(regulation…	GTCGGGCTTTGAGATTGTTTTTAAACTTTTTAAACTAGCTCTCCAACTTTAGTGGTATAG	1854	DUT	0
A_55_P1960566	1.78172	0.000138744	Ybx3	Y box protein 3	Mus musculus Y box protein 3 (Ybx3), transcript variant 1, mRNA [NM_139117]	NM_139117	NM_139117	56449	chr6	131314961	131314902	-	46917	49	304	A_55_P1960566	FALSE	Mm.458000	ENSMUST00000032309		ref|NM_139117|ref|NM_011733|ens|ENSMUST00000032309|ens|ENSMUST00000087865	chr6:131314961-131314902	mm|6qF3	GO:0000122(negative regulation of transcription from RNA polymerase II promoter)|GO:0000977(RNA polymerase II regulatory region sequence-specific DNA binding)|GO:0001227(RNA polymerase II transcription regulatory region sequence-specific DNA binding transcription factor activity involved in negative regulation of transcription)|GO:0001701(in utero embryonic development)|GO:0003676(nucleic acid bi…	GGGAGAACGTTTTTGCTTTCTCACATAGCTCTCTCTGAAATGTGCAGTAACAAGTTCCTC	8531	YBX3	0
A_55_P1982818	1.77863	0.000238099	Odc1	ornithine decarboxylase, structural 1	Mus musculus ornithine decarboxylase, structural 1 (Odc1), mRNA [NM_013614]	NM_013614	NM_013614	18263	chr12	17557869	17557928	+	32578	93	118	A_55_P1982818	FALSE	Mm.34102	ENSMUST00000171737		ref|NM_013614|ens|ENSMUST00000171737|gb|AK195147|gb|M12331	chrX:099919382-099919323	mm|XqD	GO:0001822(kidney development)|GO:0003824(catalytic activity)|GO:0004586(ornithine decarboxylase activity)|GO:0005737(cytoplasm)|GO:0005829(cytosol)|GO:0006595(polyamine metabolic process)|GO:0006596(polyamine biosynthetic process)|GO:0008284(positive regulation of cell proliferation)|GO:0009446(putrescine biosynthetic process)|GO:0016829(lyase activity)|GO:0016831(carboxy-lyase activity)|GO:0033…	AAAGTATCTTGAAATAACTGGGCATCGGGGAATGTTTGCAAGTATCCTTAAAGAAGGCAC	4953	ODC1	0
A_51_P406583	1.77585	0.000340489	Myo1e	myosin IE	Mus musculus myosin IE (Myo1e), mRNA [NM_181072]	NM_181072	NM_181072	71602	chr9	70247354	70247413	+	35307	85	235	A_51_P406583	FALSE	Mm.249311	ENSMUST00000034745		ref|NM_181072|ens|ENSMUST00000034745|ref|XM_011242814|gb|AK166477	chr9:070247354-070247413	mm|9qD	GO:0000166(nucleotide binding)|GO:0001570(vasculogenesis)|GO:0001701(in utero embryonic development)|GO:0001822(kidney development)|GO:0003094(glomerular filtration)|GO:0003774(motor activity)|GO:0003779(actin binding)|GO:0005516(calmodulin binding)|GO:0005524(ATP binding)|GO:0005737(cytoplasm)|GO:0005856(cytoskeleton)|GO:0005903(brush border)|GO:0005911(cell-cell junction)|GO:0005912(adherens ju…	CAGGTAGTATTCCACTGTACCCATTCATGAAGGTAGGTTTTATTACAGGACTCGCACCAG	4643	MYO1E	0
A_51_P429308	1.77526	0.00084114	Neto2	neuropilin (NRP) and tolloid (TLL)-like 2	Mus musculus neuropilin (NRP) and tolloid (TLL)-like 2 (Neto2), mRNA [NM_001081324]	NM_001081324	NM_001081324	74513	chr8	88161567	88161508	-	49204	42	322	A_51_P429308	FALSE	Mm.126079	ENSMUST00000109686		ref|NM_001081324|ens|ENSMUST00000109686|ref|XM_006531437|ref|XM_006531439	chr8:088161567-088161508	mm|8qC3	GO:0005886(plasma membrane)|GO:0014069(postsynaptic density)|GO:0016020(membrane)|GO:0016021(integral to membrane)|GO:0032983(kainate selective glutamate receptor complex)|GO:0035255(ionotropic glutamate receptor binding)|GO:0045202(synapse)|GO:2000312(regulation of kainate selective glutamate receptor activity)|GO:2000463(positive regulation of excitatory postsynaptic membrane potential)	ACACTTTGTTGCAAAATGATGTCTGCCATATGCCCACTTTTATTTACTACAAGTGTTAAG	81831	NETO2	0
A_55_P2095118	1.77292	0.000794108	Dancr	differentiation antagonizing non-protein coding RNA	Mus musculus differentiation antagonizing non-protein coding RNA (Dancr), long non-coding RNA [NR_015531]	NR_015531	NR_015531	70036	chr5	74490275	74490334	+	28556	105	290	A_55_P2095118	FALSE	Mm.46547			ref|NR_015531|gb|AK172703|gb|AK172090|gb|AK012278	chr5:74490275-74490334	mm|5qC3.3		GCTAGCAATTGAGGTGTGTTAACCTGTATATTGTTGCCTATGAGTAATTTTCCATAATCT			0
A_52_P56397	1.77218	0.00129887	Aunip	aurora kinase A and ninein interacting protein	Mus musculus aurora kinase A and ninein interacting protein (Aunip), mRNA [NM_001081099]	NM_001081099	NM_001081099	69885	chr4	134079662	134079721	+	51611	35	100	A_52_P56397	FALSE	Mm.141592	ENSMUST00000105866		ref|NM_001081099|ens|ENSMUST00000105866|gb|BC138271|gb|AK011279	chr4:134079662-134079721	mm|4qD3	GO:0000922(spindle pole)|GO:0003674(molecular_function)|GO:0005737(cytoplasm)|GO:0005813(centrosome)|GO:0005856(cytoskeleton)|GO:0007051(spindle organization)	TAATCGGGTTATCAGGCACTAGTTCTAGATGCTTATGTGAGGGTATCTGCAAGTGGCAGA	79000	AUNIP	0
A_51_P250559	1.77119	0.00787487	Kcnj14	potassium inwardly-rectifying channel, subfamily J, member 14	Mus musculus potassium inwardly-rectifying channel, subfamily J, member 14 (Kcnj14), mRNA [NM_145963]	NM_145963	NM_145963	211480	chr7	53072306	53072247	-	52751	32	115	A_51_P250559	FALSE	Mm.68170	ENSMUST00000071937		ref|NM_145963|ens|ENSMUST00000071937|gb|AK080732|gb|AK044725	chr1:010797286-010797345	mm|1qA2	GO:0005242(inward rectifier potassium channel activity)|GO:0005244(voltage-gated ion channel activity)|GO:0005887(integral to plasma membrane)|GO:0006810(transport)|GO:0006811(ion transport)|GO:0006813(potassium ion transport)|GO:0010107(potassium ion import)|GO:0016020(membrane)|GO:0016021(integral to membrane)|GO:0030425(dendrite)|GO:0034765(regulation of ion transmembrane transport)|GO:0043025…	GGTGAATTTTGTTTTTGTTTGAAGTGCCATTCTTAGAGCATCCAAAGGAATCAGGTTCTG	3770	KCNJ14	0
A_55_P2143042	1.76946	0.0255369	Gm8096	3-phosphoglycerate dehydrogenase pseudogene	Mus musculus predicted gene 8096 (Gm8096), non-coding RNA [NR_033590]	NR_033590	NR_033590	666422	chr8	29194216	29194157	-	11004	159	297	A_55_P2143042	FALSE	Mm.484413			ref|NR_033590|gb|AK015074|tc|TC1707118|riken|4930404C15	chr8:29194216-29194157	mm|8qA2		ACTACTGGTGAAAGAGGCTGGCCTCAATGTCACCACTTCCCACAACCCTGGGGTTCCATG			0
A_66_P116678	1.76852	0.000162682	Rps8	ribosomal protein S8	Mus musculus ribosomal protein S8 (Rps8), mRNA [NM_009098]	NM_009098	NM_009098	20116	chr4	116828736	116828677	-	22027	125	228	A_66_P116678	FALSE	Mm.338718	ENSMUST00000102696		ref|NM_009098|ens|ENSMUST00000102696|gb|AK010650|tc|TC1573678	chr4:116828736-116828677	mm|4qD1	GO:0000462(maturation of SSU-rRNA from tricistronic rRNA transcript (SSU-rRNA, 5.8S rRNA, LSU-rRNA))|GO:0003735(structural constituent of ribosome)|GO:0005622(intracellular)|GO:0005634(nucleus)|GO:0005737(cytoplasm)|GO:0005840(ribosome)|GO:0005925(focal adhesion)|GO:0006412(translation)|GO:0016020(membrane)|GO:0022627(cytosolic small ribosomal subunit)|GO:0030529(ribonucleoprotein complex)|GO:007…	AAGGCGGGGCTGAGTTTTAGAAACCGGACCGTGAAGCTTTGCGCTTCCTCTTTCCAGCCA	6202	RPS8	0
A_55_P2150741	1.76509	0.0123297	Exoc3l	exocyst complex component 3-like	Mus musculus exocyst complex component 3-like (Exoc3l), mRNA [NM_177788]	NM_177788	NM_177788	277978	chr8	107814663	107814604	-	6175	174	115	A_55_P2150741	FALSE	Mm.40228	ENSMUST00000057855		ref|NM_177788|ens|ENSMUST00000057855|ref|XM_006531070|gb|AK172618	chr8:107814663-107814604	mm|8qD3	GO:0000145(exocyst)|GO:0000149(SNARE binding)|GO:0005515(protein binding)|GO:0006887(exocytosis)|GO:0030072(peptide hormone secretion)|GO:0030141(secretory granule)|GO:0031410(cytoplasmic vesicle)|GO:0051601(exocyst localization)	TTCTGAGTTGCTAGATGGTGTGTGTGAGCAGACGTCGCACTTCTGCCAGGACTTCTGGCG	283849	EXOC3L1	0
A_51_P167263	1.76449	0.00449218	Cd5	CD5 antigen	Mus musculus CD5 antigen (Cd5), mRNA [NM_007650]	NM_007650	NM_007650	12507	chr19	10792760	10792701	-	58792	13	170	A_51_P167263	FALSE	Mm.779	ENSMUST00000025571		ref|NM_007650|ens|ENSMUST00000025571|ref|XM_006526621|gb|AK143736	chr19:010792760-010792701	mm|19qA	GO:0001948(glycoprotein binding)|GO:0005044(scavenger receptor activity)|GO:0005515(protein binding)|GO:0005886(plasma membrane)|GO:0009897(external side of plasma membrane)|GO:0016020(membrane)|GO:0016021(integral to membrane)|GO:0031295(T cell costimulation)|GO:0044214(fully spanning plasma membrane)|GO:0097190(apoptotic signaling pathway)	GACCAGTGGGGTTGGCTTTCTCCTTGGACTCTGACGCCATTGAACAAATGAGGAGGCGAT	921	CD5	0
A_51_P117087	1.76449	0.000240803	Kcnip1	Kv channel-interacting protein 1	Mus musculus Kv channel-interacting protein 1 (Kcnip1), transcript variant B, mRNA [NM_027398]	NM_027398	NM_027398	70357	chr11	33530570	33530511	-	291	192	75	A_51_P117087	FALSE	Mm.252514			ref|NM_027398|ref|NM_001290690|ref|NM_001190885|ref|NM_001190886	chr11:033530570-033530511	mm|11qA4	GO:0005244(voltage-gated ion channel activity)|GO:0005267(potassium channel activity)|GO:0005509(calcium ion binding)|GO:0005737(cytoplasm)|GO:0005886(plasma membrane)|GO:0006810(transport)|GO:0006811(ion transport)|GO:0006813(potassium ion transport)|GO:0008076(voltage-gated potassium channel complex)|GO:0015459(potassium channel regulator activity)|GO:0016020(membrane)|GO:0030425(dendrite)|GO:0…	TGTTCCAAAATGTCATGTAACTGAGGACACTGGCCATTCTGCTCTCAGAGACACTGACAA	30820	KCNIP1	0
A_55_P2039444	1.76392	2.81783e-05	Cmss1	cms small ribosomal subunit 1	Mus musculus cms small ribosomal subunit 1 (Cmss1), mRNA [NM_025599]	NM_025599	NM_025599	66497	chr16	57302371	57302312	-	39084	73	226	A_55_P2039444	FALSE	Mm.425976	ENSMUST00000114371		ref|NM_025599|ens|ENSMUST00000114371|ref|XM_006522461|ref|XM_011245995	chr16:057302371-057302312	mm|16qC1.1	GO:0005575(cellular_component)|GO:0008150(biological_process)	CTAGATATGGGAGTGTTCAGCCTGTGCAAGTCGGACTCCTTGAAGCTGGGTCTTTTCTAA	84319	CMSS1	0
A_55_P1978735	1.7637	0.171817	Slx4ip	SLX4 interacting protein	Mus musculus SLX4 interacting protein (Slx4ip), transcript variant 1, mRNA [NM_028834]	NM_028834	NM_028834	74243	chr2	136894055	136894114	+	4038	180	126	A_55_P1978735	FALSE	Mm.330612			ref|NM_028834|ref|XM_011239815|gb|AK008687|riken|2210009G21	chr2:136894055-136894114	mm|2qF3	GO:0003674(molecular_function)|GO:0005575(cellular_component)|GO:0008150(biological_process)	GAAAAACTGAGGATACAGTACCTGGGGTATTGGAAGGAATTAGGACAATTACTTTAAATA	128710	SLX4IP	0
A_55_P2122648	1.76363	0.000331349	Dtymk	deoxythymidylate kinase	Mus musculus deoxythymidylate kinase (Dtymk), transcript variant 2, mRNA [NM_023136]	NM_023136	NM_023136	21915	chr1	95697140	95697081	-	24493	118	215	A_55_P2122648	FALSE	Mm.250332			ref|NM_023136|gb|AK019288|gb|AK019284|gb|BC069902	chr1:095697140-095697081	mm|1qD	GO:0000166(nucleotide binding)|GO:0004798(thymidylate kinase activity)|GO:0005524(ATP binding)|GO:0005737(cytoplasm)|GO:0005739(mitochondrion)|GO:0005758(mitochondrial intermembrane space)|GO:0005759(mitochondrial matrix)|GO:0005829(cytosol)|GO:0006227(dUDP biosynthetic process)|GO:0006233(dTDP biosynthetic process)|GO:0006235(dTTP biosynthetic process)|GO:0009041(uridylate kinase activity)|GO:00…	CGTCGTATTTGACCATCGTATTTAACCACATCCGGCTTGTTTTGTTTTATTAAAAGGTTT	1841	DTYMK	0
A_55_P1968568	1.76355	0.00197142	Rapgef5	Rap guanine nucleotide exchange factor (GEF) 5	Mus musculus Rap guanine nucleotide exchange factor (GEF) 5 (Rapgef5), mRNA [NM_175930]	NM_175930	NM_175930	217944	chr12	118995059	118995118	+	27914	107	262	A_55_P1968568	FALSE	Mm.227642	ENSMUST00000109691		ref|NM_175930|ens|ENSMUST00000109691|gb|AK029995|gb|AK083591	chr12:118995059-118995118	mm|12qF2	GO:0005085(guanyl-nucleotide exchange factor activity)|GO:0005634(nucleus)|GO:0007264(small GTPase mediated signal transduction)|GO:0017034(Rap guanyl-nucleotide exchange factor activity)|GO:0030742(GTP-dependent protein binding)|GO:0035556(intracellular signal transduction)|GO:0043547(positive regulation of GTPase activity)	AATGCGCGGCACACACTTCTTTGCATCCACAATCATTTGCCAATGTATATGCAGATGAAC	9771	RAPGEF5	0
A_55_P2118062	1.76328	0.00109228	Leng8	leukocyte receptor cluster (LRC) member 8	Mus musculus 0 day neonate kidney cDNA, RIKEN full-length enriched library, clone:D630008M13 product:hypothetical Tyrosine-rich region containing protein, full insert sequence. [AK085304]		AK085304	232798	chr7	4091995	4092054	+	43738	59	102	A_55_P2118062	FALSE	Mm.22831			gb|AK085304|tc|TC1761387|riken|D630008M13|nap|NAP086631-1	chr7:4091995-4092054	mm|7qA1	GO:0005575(cellular_component)|GO:0008150(biological_process)	CATTACCTACTTACCCCATAGCTGTGTGTAGACTTTATTAAAATCTGGGTTTTTGCTTTT	114823	LENG8	0
A_55_P2269988	1.76309	0.00888398	5930438M14Rik	RIKEN cDNA 5930438M14 gene	Mus musculus RIKEN cDNA 5930438M14 gene (5930438M14Rik), long non-coding RNA [NR_046158]	NR_046158	NR_046158	328324	chr13	102017272	102017331	+	13268	152	34	A_55_P2269988	FALSE	Mm.402274			ref|NR_046158|gb|AK031263|riken|5930438M14|nap|NAP075491-1	chr13:102017272-102017331	mm|13qD1		GTGCAATTTTGAGTGACAGATATACAACAAGAAAGGTGTAGGATGCTATTGATGTCAATA			0
A_52_P598634	1.76295	1.00495e-05	1190007I07Rik	RIKEN cDNA 1190007I07 gene	Mus musculus RIKEN cDNA 1190007I07 gene (1190007I07Rik), transcript variant 1, mRNA [NM_001135567]	NM_001135567	NM_001135567	544717	chr10	82082933	82082874	-	27827	108	107	A_52_P598634	FALSE	Mm.334867	ENSMUST00000183363		ref|NM_001135567|ref|NM_001135568|ref|NM_001135569|ens|ENSMUST00000183363	chr10:086151308-086151367	mm|10qC1	GO:0003674(molecular_function)|GO:0005575(cellular_component)|GO:0005576(extracellular region)|GO:0008150(biological_process)	AGAACTCTAAATGGAGCTTTTGGGACTGAAAGAGAGACGCCACGAACCTCATGTTTCACA	728568	C12orf73	0
A_51_P457196	1.76272	0.000189858	Sfrp4	secreted frizzled-related protein 4	Mus musculus secreted frizzled-related protein 4 (Sfrp4), mRNA [NM_016687]	NM_016687	NM_016687	20379	chr13	19724488	19724547	+	48811	44	123	A_51_P457196	FALSE	Mm.42095	ENSMUST00000002883		ref|NM_016687|ens|ENSMUST00000002883|gb|AK080766|gb|AK009981	chr13:019724488-019724547	mm|13qA2	GO:0002092(positive regulation of receptor internalization)|GO:0005576(extracellular region)|GO:0005615(extracellular space)|GO:0005634(nucleus)|GO:0005737(cytoplasm)|GO:0007275(multicellular organismal development)|GO:0008285(negative regulation of cell proliferation)|GO:0009986(cell surface)|GO:0010628(positive regulation of gene expression)|GO:0016055(Wnt receptor signaling pathway)|GO:0017147…	CACAGTTGTCTGTGTGCATACTGTGTAAGACCTCCTGTTTTAAGAGTTTGACCTAAAATG	6424	SFRP4	0
A_51_P398603	1.76246	0.00276052	Ccdc150	coiled-coil domain containing 150	Mus musculus coiled-coil domain containing 150 (Ccdc150), mRNA [NM_030025]	NM_030025	NM_030025	78016	chr1	54425299	54425358	+	18685	136	23	A_51_P398603	FALSE	Mm.67455	ENSMUST00000159682		ref|NM_030025|ens|ENSMUST00000159682|ens|ENSMUST00000163072|ens|ENSMUST00000027128	chr1:054425299-054425358	mm|1qC1.1	GO:0003674(molecular_function)|GO:0005575(cellular_component)|GO:0008150(biological_process)	TGGCCTGTTTCTACGTTAGAAGACCATGATGTGTGCTGAAGGTTTTGGGCTTTGTCCTTT	284992	CCDC150	0
A_51_P220317	1.76179	0.00733035	Cdca7l	cell division cycle associated 7 like	Mus musculus cell division cycle associated 7 like (Cdca7l), mRNA [NM_146040]	NM_146040	NM_146040	217946	chr12	119116400	119116459	+	46509	51	135	A_51_P220317	FALSE	Mm.281149	ENSMUST00000021592		ref|NM_146040|ens|ENSMUST00000021592|ref|XM_006515786|ref|XM_006515784	chr12:119116400-119116459	mm|12qF2	GO:0005634(nucleus)|GO:0005730(nucleolus)|GO:0005737(cytoplasm)|GO:0006351(transcription, DNA-dependent)|GO:0006355(regulation of transcription, DNA-dependent)|GO:0008284(positive regulation of cell proliferation)	TATATTGAAGAATGTTACTCTAAACTACCAAGTGCAATTAACCACACACTGTGAGTAAGG	55536	CDCA7L	0
A_55_P1973995	1.76129	0.0398843	Gm6756	3-phosphoglycerate dehydrogenase pseudogene	Mus musculus predicted gene 6756 (Gm6756), non-coding RNA [NR_076393]	NR_076393	NR_076393	627427	chr18	37081750	37081809	+	60208	9	289	A_55_P1973995	FALSE				ref|NR_076393|gb|AK076985|tc|TC1596666|riken|4930590G01	chr18:37081750-37081809	mm|18qB2		CCGCAGAACCAGGGCATCTGCCTGAACTAATATCTAGTAACGAATTTTAACTCCAAAAAA			0
A_51_P395921	1.76009	5.19364e-05	Uchl4	ubiquitin carboxyl-terminal esterase L4	Mus musculus ubiquitin carboxyl-terminal esterase L4 (Uchl4), mRNA [NM_033607]	NM_033607	NM_033607	93841	chr9	64083589	64083648	+	17902	138	277	A_51_P395921	FALSE	Mm.390180	ENSMUST00000039011		ref|NM_033607|ens|ENSMUST00000039011|gb|BC139440|gb|BC139441	chr9:064083589-064083648	mm|9qC	GO:0004843(ubiquitin-specific protease activity)|GO:0005622(intracellular)|GO:0005737(cytoplasm)|GO:0006508(proteolysis)|GO:0006511(ubiquitin-dependent protein catabolic process)|GO:0008233(peptidase activity)|GO:0008234(cysteine-type peptidase activity)|GO:0016579(protein deubiquitination)|GO:0016787(hydrolase activity)	CATCTCTATGAATTAGATGGATGGAAACCATTTCCAATTAACCATGGGAAAACTAGCGAT	7347	UCHL3	0
A_52_P144285	1.75983	0.000459216	Fam72a	family with sequence similarity 72, member A	Mus musculus family with sequence similarity 72, member A (Fam72a), mRNA [NM_175382]	NM_175382	NM_175382	108900	chr1	133430451	133430510	+	34877	86	112	A_52_P144285	FALSE	Mm.31278	ENSMUST00000068613		ref|NM_175382|ens|ENSMUST00000068613|gb|AK076058|gb|BC106123	chr1:133430451-133430510	mm|1qE4	GO:0003674(molecular_function)|GO:0005737(cytoplasm)|GO:0005739(mitochondrion)|GO:0005829(cytosol)|GO:0016020(membrane)|GO:0031552(negative regulation of brain-derived neurotrophic factor-activated receptor activity)|GO:0043065(positive regulation of apoptotic process)	GACACTTCTGGATGTTTCACAGTCAGGCGGTTTATGGTATAAACAGACTAGATGCCACTG	554282	FAM72C	0
A_55_P2111990	1.7583	0.0169704	Tekt1	tektin 1	Mus musculus tektin 1 (Tekt1), transcript variant 1, mRNA [NM_001282006]	NM_001282006	NM_001282006	21689	chr11	72158373	72158314	-	43211	61	171	A_55_P2111990	FALSE	Mm.42257	ENSMUST00000108502		ref|NM_001282006|ref|NM_011569|ref|NM_001282007|ens|ENSMUST00000108502	chr11:072158373-072158314	mm|11qB4	GO:0005634(nucleus)|GO:0005874(microtubule)|GO:0015630(microtubule cytoskeleton)	TATATCGACCAGGTGCTGTGTATGGAGATGAGGAAGTCCATCCCACCTCGAGACGGCGAC	83659	TEKT1	0
A_55_P2097863	1.75757	0.000414005	L2hgdh	L-2-hydroxyglutarate dehydrogenase	Mus musculus L-2-hydroxyglutarate dehydrogenase (L2hgdh), mRNA [NM_145443]	NM_145443	NM_145443	217666	chr12	70793239	70793180	-	8163	168	75	A_55_P2097863	FALSE	Mm.103362	ENSMUST00000021370		ref|NM_145443|ens|ENSMUST00000021370|gb|AK152450|gb|AK168429	chr10:078091612-078091553	mm|10qC1	GO:0005739(mitochondrion)|GO:0016021(integral to membrane)|GO:0016491(oxidoreductase activity)|GO:0044267(cellular protein metabolic process)|GO:0047545(2-hydroxyglutarate dehydrogenase activity)|GO:0055114(oxidation-reduction process)	GGGTCTACCGGCTGCGTTTTAAAATTAGAATTTAAGAAAACAATTTGAAAACCATGCCTT	79944	L2HGDH	0
A_55_P2176240	1.75721	3.74655e-06	Pdxk	pyridoxal (pyridoxine, vitamin B6) kinase	Mus musculus pyridoxal (pyridoxine, vitamin B6) kinase (Pdxk), mRNA [NM_172134]	NM_172134	NM_172134	216134	chr10	77903501	77903442	-	8601	166	184	A_55_P2176240	FALSE	Mm.206159	ENSMUST00000105385		ref|NM_172134|ref|NR_027316|ens|ENSMUST00000105385|ens|ENSMUST00000041616	chr10:077903501-077903442	mm|10qC1	GO:0000166(nucleotide binding)|GO:0000287(magnesium ion binding)|GO:0005524(ATP binding)|GO:0005634(nucleus)|GO:0005654(nucleoplasm)|GO:0005737(cytoplasm)|GO:0005829(cytosol)|GO:0008144(drug binding)|GO:0008270(zinc ion binding)|GO:0008283(cell proliferation)|GO:0008478(pyridoxal kinase activity)|GO:0009443(pyridoxal 5'-phosphate salvage)|GO:0016301(kinase activity)|GO:0016310(phosphorylation)|GO…	GTCTCCATCCCTGTGAAAAGCTGTAACGTCTGCCTTAGAGCCATGACTGAAACTCGACAT	8566	PDXK	0
A_55_P2258832	1.75669	0.0150098	5230400M03Rik	RIKEN cDNA 5230400M03 gene	Mus musculus adult male xiphoid cartilage cDNA, RIKEN full-length enriched library, clone:5230400M03 product:unclassifiable, full insert sequence. [AK030345]		AK030345	100502767	chr2	52729313	52729372	+	20365	130	272	A_55_P2258832	FALSE	Mm.274277			gb|AK030345|tc|TC1604838|riken|5230400M03|nap|NAP014505-001	chr2:52729313-52729372	mm|2qC1.1		CCAGGTAGAAATTATATTATTGCTGTAAGTAGCCCTGATTCTTCCCCTGTTGATTTTTAA			0
A_55_P2062627	1.75647	2.92938e-07	Tmem238	transmembrane protein 238	Mus musculus transmembrane protein 238 (Tmem238), mRNA [NM_029384]	NM_029384	NM_029384	664968	chr7	4736451	4736392	-	22923	123	75	A_55_P2062627	FALSE	Mm.292837	ENSMUST00000168578		ref|NM_029384|ens|ENSMUST00000168578|gb|AK008900|gb|BC132101	chr7:004736451-004736392	mm|7qA1	GO:0003674(molecular_function)|GO:0005575(cellular_component)|GO:0008150(biological_process)|GO:0016020(membrane)|GO:0016021(integral to membrane)	AATGTGGGCAGACTGAATCTGAGTGTAGACCACACACTTTCAAGAAAAGGTTTGGCAGTG	388564	TMEM238	0
A_55_P2412319	1.75562	0.000221771	A830052D11Rik	RIKEN cDNA A830052D11 gene	Mus musculus RIKEN cDNA A830052D11 gene (A830052D11Rik), long non-coding RNA [NR_045403]	NR_045403	NR_045403	402767	chr18	32518779	32518720	-	28459	106	155	A_55_P2412319	FALSE	Mm.385109			ref|NR_045403|gb|AK043919|tc|TC1612751|riken|A830052D11	chr18:32518779-32518720	mm|18qB1	GO:0003674(molecular_function)|GO:0005575(cellular_component)|GO:0008150(biological_process)	TTTCTGTCTGAGCCTACTGTGGGGAAAGACTGTTGCTTGGCCTTTGTAAGTAAAGAGCTT			0
A_51_P518600	1.75433	0.0105781	Atp6v1c2	ATPase, H+ transporting, lysosomal V1 subunit C2	Mus musculus ATPase, H+ transporting, lysosomal V1 subunit C2 (Atp6v1c2), transcript variant 2, mRNA [NM_133699]	NM_133699	NM_133699	68775	chr12	17291625	17291566	-	7013	171	80	A_51_P518600	FALSE	Mm.178798	ENSMUST00000140751		ref|NM_133699|ref|NM_001159632|ens|ENSMUST00000140751|ens|ENSMUST00000095820	chr12:017291625-017291566	mm|12qA1.1	GO:0005765(lysosomal membrane)|GO:0006810(transport)|GO:0006811(ion transport)|GO:0008553(hydrogen-exporting ATPase activity, phosphorylative mechanism)|GO:0015078(hydrogen ion transmembrane transporter activity)|GO:0015991(ATP hydrolysis coupled proton transport)|GO:0015992(proton transport)|GO:0030177(positive regulation of Wnt receptor signaling pathway)|GO:0033180(proton-transporting V-type A…	ACAACCGAGTCCTGCAGGATTCTGACTCAGAAGATACTCACAGACGTTAGTTAGAGTGTA	245973	ATP6V1C2	0
A_52_P657800	1.75365	0.0242606	Cep152	centrosomal protein 152	Mus musculus centrosomal protein 152 (Cep152), mRNA [NM_001081091]	NM_001081091	NM_001081091	99100	chr2	125389395	125389336	-	8287	167	156	A_52_P657800	FALSE	Mm.330545	ENSMUST00000089776		ref|NM_001081091|ens|ENSMUST00000089776|ref|XM_011239870|ref|XM_006500474	chr2:125389395-125389336	mm|2qF1	GO:0005515(protein binding)|GO:0005654(nucleoplasm)|GO:0005737(cytoplasm)|GO:0005813(centrosome)|GO:0005815(microtubule organizing center)|GO:0005856(cytoskeleton)|GO:0007099(centriole replication)|GO:0019901(protein kinase binding)|GO:0030030(cell projection organization)|GO:0051298(centrosome duplication)	ATCCAGATGCCCAGAAAAGTAATATGGTTTGTCGGAGTAGTCACACTCTAGATCTGCCCA	22995	CEP152	0
A_52_P480360	1.75323	0.000927474	Dut	deoxyuridine triphosphatase	Mus musculus deoxyuridine triphosphatase (Dut), transcript variant 2, mRNA [NM_023595]	NM_023595	NM_023595	110074	chr2	125083359	125083418	+	51876	34	226	A_52_P480360	FALSE	Mm.282499	ENSMUST00000082122		ref|NM_023595|ref|NM_001159646|ens|ENSMUST00000082122|ens|ENSMUST00000051605	chr2:125083359-125083418	mm|2qF1	GO:0000287(magnesium ion binding)|GO:0004170(dUTP diphosphatase activity)|GO:0005634(nucleus)|GO:0005654(nucleoplasm)|GO:0005737(cytoplasm)|GO:0005739(mitochondrion)|GO:0005829(cytosol)|GO:0006226(dUMP biosynthetic process)|GO:0030547(receptor inhibitor activity)|GO:0032556(pyrimidine deoxyribonucleotide binding)|GO:0042975(peroxisome proliferator activated receptor binding)|GO:0043497(regulation…	TTTGTTGTTGTTGTATTATTTAAATTATAGCCTTCCAAAAACTGTTTTTGATCATAATTG	1854	DUT	0
A_55_P2017826	1.75242	0.00210982	Myb	myeloblastosis oncogene	Mus musculus myeloblastosis oncogene (Myb), transcript variant 1, mRNA [NM_001198914]	NM_001198914	NM_001198914	17863	chr10	20844795	20844736	-	11005	159	295	A_55_P2017826	FALSE	Mm.52109			ref|NM_001198914|ref|NM_010848	chr10:020844795-020844736	mm|10qA3	GO:0000082(G1/S transition of mitotic cell cycle)|GO:0000122(negative regulation of transcription from RNA polymerase II promoter)|GO:0000978(RNA polymerase II core promoter proximal region sequence-specific DNA binding)|GO:0001077(RNA polymerase II core promoter proximal region sequence-specific DNA binding transcription factor activity involved in positive regulation of transcription)|GO:000170…	TGACAGTGTATCTACTGCCTTGTAGCAAAATAAAGCTATCCTCTTATTTTACATACTTCC	4602	MYB	0
A_55_P2003813	1.74987	0.0107267	Scn3b	sodium channel, voltage-gated, type III, beta	Mus musculus sodium channel, voltage-gated, type III, beta (Scn3b), transcript variant 2, mRNA [NM_178227]	NM_178227	NM_178227	235281	chr9	40098873	40098932	+	6855	172	67	A_55_P2003813	FALSE	Mm.290083	ENSMUST00000049941		ref|NM_178227|ref|NM_001083917|ref|NM_001286614|ens|ENSMUST00000049941	chr9:040098873-040098932	mm|9qA5.1	GO:0001518(voltage-gated sodium channel complex)|GO:0005244(voltage-gated ion channel activity)|GO:0005272(sodium channel activity)|GO:0005886(plasma membrane)|GO:0006810(transport)|GO:0006811(ion transport)|GO:0006814(sodium ion transport)|GO:0010460(positive regulation of heart rate)|GO:0010765(positive regulation of sodium ion transport)|GO:0016020(membrane)|GO:0016021(integral to membrane)|GO…	GAGAGAGACAGAGAGAGAGACAGAGACCTTCCTCTCACTTGTTTTATAAATGAGAAAGCC	55800	SCN3B	0
A_55_P2278965	1.74972	0.050231	5430420F09Rik	RIKEN cDNA 5430420F09 gene	Mus musculus 6 days neonate head cDNA, RIKEN full-length enriched library, clone:5430420F09 product:unclassifiable, full insert sequence. [AK017326]		AK017326	74491	chr3	51875612	51875553	-	54098	28	45	A_55_P2278965	FALSE	Mm.394303			gb|AK017326|riken|5430420F09|nap|NAP073671-1	chr3:51875612-51875553	mm|3qC		TACTTATTTTCAGGAAAGACCTCCTGTGTACTAGGCAAATGTTTTGTCACTACCCTCTAC			0
A_55_P2111478	1.74831	0.00101603	Polq	polymerase (DNA directed), theta	Mus musculus polymerase (DNA directed), theta (Polq), transcript variant 1, mRNA [NM_029977]	NM_029977	NM_029977	77782	chr16	37095392	37095451	+	59119	12	172	A_55_P2111478	FALSE	Mm.259114	ENSMUST00000182946		ref|NM_029977|ref|NM_001159369|ens|ENSMUST00000182946|ens|ENSMUST00000054034	chr16:037095392-037095451	mm|16qB3	GO:0000166(nucleotide binding)|GO:0003676(nucleic acid binding)|GO:0003677(DNA binding)|GO:0003682(chromatin binding)|GO:0003887(DNA-directed DNA polymerase activity)|GO:0005524(ATP binding)|GO:0005634(nucleus)|GO:0005694(chromosome)|GO:0006260(DNA replication)|GO:0006261(DNA-dependent DNA replication)|GO:0006281(DNA repair)|GO:0006284(base-excision repair)|GO:0006302(double-strand break repair)|…	GTGCCTGTATTTGTGGTATGATATGAAGAGAATTCTCAGGCTTAAAACATTGGATTTCTT	10721	POLQ	0
A_55_P2152912	1.74739	0.0326992	1700110I01Rik	RIKEN cDNA 1700110I01 gene	Mus musculus RIKEN cDNA 1700110I01 gene (1700110I01Rik), long non-coding RNA [NR_038059]	NR_038059	NR_038059	73549	chr14	3304995	3305054	+	29020	104	18	A_55_P2152912	FALSE	Mm.398741	ENSMUST00000096151		ref|NR_038059|ens|ENSMUST00000096151|ref|XM_011244812|ref|XM_011244811	chr14:3304995-3305054	mm|14qA1	GO:0003674(molecular_function)|GO:0005575(cellular_component)|GO:0008150(biological_process)	ATCAAGCAAAGAAATAAACCCTGACAGGTTGTCATGGCCTCCGCATATGTGAAGTTGCCT			0
A_65_P18981	1.74646	6.58171e-05	Palb2	partner and localizer of BRCA2	Mus musculus partner and localizer of BRCA2 (Palb2), transcript variant 1, mRNA [NM_001081238]	NM_001081238	NM_001081238	233826	chr7	129251086	129251027	-	43354	60	214	A_65_P18981	FALSE	Mm.38348	ENSMUST00000131657		ref|NM_001081238|ref|NM_001289844|ref|NM_001289845|ens|ENSMUST00000131657	chr7:129251086-129251027	mm|7qF3	GO:0000724(double-strand break repair via homologous recombination)|GO:0001701(in utero embryonic development)|GO:0001756(somitogenesis)|GO:0001833(inner cell mass cell proliferation)|GO:0003677(DNA binding)|GO:0005634(nucleus)|GO:0005654(nucleoplasm)|GO:0006281(DNA repair)|GO:0006310(DNA recombination)|GO:0006974(response to DNA damage stimulus)|GO:0007498(mesoderm development)|GO:0009887(organ …	TCACTTGCTAGCTGGACAAAAGGATGGAAATATATTTATATACCGATACTTTTAAGAGGC	79728	PALB2	0
A_52_P574653	1.74512	4.57571e-06	Bid	BH3 interacting domain death agonist	Mus musculus BH3 interacting domain death agonist (Bid), mRNA [NM_007544]	NM_007544	NM_007544	12122	chr6	120843523	120843464	-	7301	170	160	A_52_P574653	FALSE	Mm.235081	ENSMUST00000004560		ref|NM_007544|ens|ENSMUST00000004560|ens|ENSMUST00000160684|ref|XM_006505409	chr6:120843523-120843464	mm|6qF1	GO:0001836(release of cytochrome c from mitochondria)|GO:0005515(protein binding)|GO:0005622(intracellular)|GO:0005623(cell)|GO:0005737(cytoplasm)|GO:0005739(mitochondrion)|GO:0005829(cytosol)|GO:0006626(protein targeting to mitochondrion)|GO:0006915(apoptotic process)|GO:0006919(activation of cysteine-type endopeptidase activity involved in apoptotic process)|GO:0008637(apoptotic mitochondrial c…	CTCTTTCCCTGGGTAACATCACAGAAGATTCCATATCAAAAGCAAATGTTCCCTCCGCTT	637	BID	0
A_55_P2197847	1.74386	0.374829	Lhx1os	LIM homeobox 1, opposite strand	AGENCOURT_10836549 NIH_MGC_154 Mus musculus cDNA clone IMAGE:6763232 5', mRNA sequence [CA492922]		CA492922	78365	unmapped	-1	-1		37043	80	43	A_55_P2197847	FALSE	Mm.260345			gb|CA492922	unmapped		GO:0003674(molecular_function)|GO:0005575(cellular_component)|GO:0008150(biological_process)	TTTAGTATTTTCTGCCCCCCGTGTTATTTTCACGTGCAGAAATAAAGCGCACCGCTACTC			0
A_55_P2080703	1.74317	0.000750499	Cstf2	cleavage stimulation factor, 3' pre-RNA subunit 2	Mus musculus cleavage stimulation factor, 3' pre-RNA subunit 2 (Cstf2), transcript variant 3, mRNA [NM_001290399]	NM_001290399	NM_001290399	108062	chrX	130610180	130610239	+	59562	11	269	A_55_P2080703	FALSE	Mm.67938	ENSMUST00000113286		ref|NM_001290399|ens|ENSMUST00000113286|gb|BC036719|tc|TC1586079	chrX:130610180-130610239	mm|XqE3	GO:0000166(nucleotide binding)|GO:0003676(nucleic acid binding)|GO:0003723(RNA binding)|GO:0005634(nucleus)|GO:0005654(nucleoplasm)|GO:0005847(mRNA cleavage and polyadenylation specificity factor complex)|GO:0006397(mRNA processing)|GO:0071920(cleavage body)	AGGTTTAGAAGCTGAAGGTCAGAACGTCAGGTGACTTGGCCAGATTCACTTAACAAAAAA	1478	CSTF2	0
A_51_P496432	1.74209	0.000323186	Acsl1	acyl-CoA synthetase long-chain family member 1	Mus musculus acyl-CoA synthetase long-chain family member 1 (Acsl1), transcript variant 2, mRNA [NM_007981]	NM_007981	NM_007981	14081	chr8	47621232	47621291	+	11560	157	170	A_51_P496432	FALSE	Mm.210323	ENSMUST00000034046		ref|NM_007981|ref|NM_001302163|ens|ENSMUST00000034046|ref|XM_006509264	chr8:047621232-047621291	mm|8qB1.1	GO:0000166(nucleotide binding)|GO:0001676(long-chain fatty acid metabolic process)|GO:0003824(catalytic activity)|GO:0004467(long-chain fatty acid-CoA ligase activity)|GO:0005524(ATP binding)|GO:0005739(mitochondrion)|GO:0005741(mitochondrial outer membrane)|GO:0005777(peroxisome)|GO:0005778(peroxisomal membrane)|GO:0005783(endoplasmic reticulum)|GO:0005886(plasma membrane)|GO:0006629(lipid metab…	GCCTAACTTCATACTCGTATTCTTAATTGCACAGGAAGTCGCTAATTTGTCACAACGGGG	2180	ACSL1	0
A_55_P2170335	1.74176	0.000397517	Bmi1	Bmi1 polycomb ring finger oncogene	Mus musculus Bmi1 polycomb ring finger oncogene (Bmi1), mRNA [NM_007552]	NM_007552	NM_007552	12151	chr2	18607531	18607590	+	3608	182	1	A_55_P2170335	FALSE	Mm.289584	ENSMUST00000051929		ref|NM_007552|ens|ENSMUST00000051929|ens|ENSMUST00000028071|ens|ENSMUST00000182652	chr2:018607531-018607590	mm|2qA3	GO:0000122(negative regulation of transcription from RNA polymerase II promoter)|GO:0000151(ubiquitin ligase complex)|GO:0000792(heterochromatin)|GO:0001501(skeletal system development)|GO:0001701(in utero embryonic development)|GO:0003682(chromatin binding)|GO:0005515(protein binding)|GO:0005634(nucleus)|GO:0005737(cytoplasm)|GO:0006306(DNA methylation)|GO:0006351(transcription, DNA-dependent)|G…	GCTTTGTCTTGCTTGTAGCCATTAAATCATTACTTTTACACACATTGCTGTTAACTTCTG	648	BMI1	0
A_55_P2112205	1.74059	0.000348354	Cntrl	centriolin	Mus musculus centriolin (Cntrl), transcript variant 3, mRNA [NM_001290635]	NM_001290635	NM_001290635	26920	chr2	35002923	35002982	+	13797	150	288	A_55_P2112205	FALSE	Mm.231332	ENSMUST00000123884		ref|NM_001290635|ens|ENSMUST00000123884|ens|ENSMUST00000113033|gb|BC060146	chr2:035002923-035002982	mm|2qB	GO:0000278(mitotic cell cycle)|GO:0003674(molecular_function)|GO:0005737(cytoplasm)|GO:0005813(centrosome)|GO:0005856(cytoskeleton)|GO:0007049(cell cycle)|GO:0008150(biological_process)|GO:0016020(membrane)|GO:0051301(cell division)	CGAGCAGAGGTCGGTACCCAAGTCAGTCAGGATGTGCTCATCAGCACTGTCTCAGAGTGA	11064	CNTRL	0
A_51_P343350	1.73971	0.0827121	Amn	amnionless	Mus musculus amnionless (Amn), mRNA [NM_033603]	NM_033603	NM_033603	93835	chr12	112514095	112514243	+	7633	169	152	A_51_P343350	FALSE	Mm.197639	ENSMUST00000021707		ref|NM_033603|ens|ENSMUST00000021707|gb|AK017204|gb|BC087954	unmapped		GO:0005102(receptor binding)|GO:0005615(extracellular space)|GO:0006898(receptor-mediated endocytosis)|GO:0007275(multicellular organismal development)|GO:0007588(excretion)|GO:0008104(protein localization)|GO:0015889(cobalamin transport)|GO:0016020(membrane)|GO:0016021(integral to membrane)|GO:0016324(apical plasma membrane)|GO:0030139(endocytic vesicle)|GO:0043001(Golgi to plasma membrane prote…	TTTCCGAAATCCGATTTTCGACGCGATTGTCTTCAAGCAGCAGCCTTCGGTCGAGCTACC	81693	AMN	0
A_55_P2075429	1.73965	4.82114e-05	Ttll4	tubulin tyrosine ligase-like family, member 4	Mus musculus tubulin tyrosine ligase-like family, member 4 (Ttll4), mRNA [NM_001014974]	NM_001014974	NM_001014974	67534	chr1	74744487	74744546	+	30983	98	28	A_55_P2075429	FALSE	Mm.260714	ENSMUST00000113678		ref|NM_001014974|gb|BC044790|gb|BC085151|ens|ENSMUST00000113678	chr1:074744487-074744546	mm|1qC3	GO:0005575(cellular_component)|GO:0005737(cytoplasm)|GO:0005856(cytoskeleton)|GO:0005929(cilium)|GO:0006464(cellular protein modification process)|GO:0015631(tubulin binding)|GO:0016874(ligase activity)|GO:0018095(protein polyglutamylation)|GO:0042995(cell projection)	ATTTCTCAGTAGAGAAGACAGTGACAGTCAAGCAGCTTTATAAAGCAGGGTTTGGTTTCT	9654	TTLL4	0
A_51_P284823	1.73925	8.63765e-05	Polr1b	polymerase (RNA) I polypeptide B	Mus musculus polymerase (RNA) I polypeptide B (Polr1b), mRNA [NM_009086]	NM_009086	NM_009086	20017	chr2	128951870	128951929	+	6131	174	203	A_51_P284823	FALSE	Mm.259078	ENSMUST00000103205		ref|NM_009086|ens|ENSMUST00000103205|gb|AK156712|gb|AK144616	chr2:128951870-128951929	mm|2qF1	GO:0001054(RNA polymerase I activity)|GO:0003677(DNA binding)|GO:0003899(DNA-directed RNA polymerase activity)|GO:0005515(protein binding)|GO:0005634(nucleus)|GO:0005730(nucleolus)|GO:0005736(DNA-directed RNA polymerase I complex)|GO:0005737(cytoplasm)|GO:0006351(transcription, DNA-dependent)|GO:0007566(embryo implantation)|GO:0009303(rRNA transcription)|GO:0009790(embryo development)|GO:0016740(…	GAGGTGTCCTGTATAACACAAGTGAGGGTATTATGGGCTCACTCTGGGTCTATACAAGAA	84172	POLR1B	0
A_55_P2132024	1.73883	0.0089718	Tekt1	tektin 1	Mus musculus tektin 1 (Tekt1), transcript variant 1, mRNA [NM_001282006]	NM_001282006	NM_001282006	21689	chr11	72158290	72158231	-	51518	35	286	A_55_P2132024	FALSE	Mm.42257	ENSMUST00000021155		ref|NM_001282006|ref|NM_011569|ref|NM_001282007|ens|ENSMUST00000021155	chr11:072158290-072158231	mm|11qB4	GO:0005634(nucleus)|GO:0005874(microtubule)|GO:0015630(microtubule cytoskeleton)	CATCCGCGCAGAGGCCATCTGCTGATAGGAGCCATTCAGAGCCTTATTAAACTGCATCGT	83659	TEKT1	0
A_55_P2155654	1.73804	0.00266661	Pvt1	plasmacytoma variant translocation 1	Mus musculus plasmacytoma variant translocation 1 (Pvt1), long non-coding RNA [NR_003368]	NR_003368	NR_003368	19296	chr15	62082471	62082530	+	55642	23	237	A_55_P2155654	FALSE	Mm.4608			ref|NR_003368|gb|Z12002|gb|AK169927|tc|TC1640188	chr15:62082471-62082530	mm|15qD1		AGCCTGTTCTGCCCTGGATGCTTTATTAAGTAATGAAGCTCAATAAAACAATTTGACCAA			0
A_55_P2089035	1.73802	0.000100053	Pole	polymerase (DNA directed), epsilon	Mus musculus lung RCB-0558 LLC cDNA, RIKEN full-length enriched library, clone:G730012N14 product:polymerase (DNA directed), epsilon, full insert sequence. [AK165879]		AK165879	18973	chr5	110720154	110720213	+	54455	26	316	A_55_P2089035	FALSE	Mm.35061			gb|AK165879|tc|TC1677989|riken|G730012N14	chr5:110720154-110720213	mm|5qF	GO:0000082(G1/S transition of mitotic cell cycle)|GO:0000166(nucleotide binding)|GO:0000731(DNA synthesis involved in DNA repair)|GO:0003676(nucleic acid binding)|GO:0003677(DNA binding)|GO:0003682(chromatin binding)|GO:0003887(DNA-directed DNA polymerase activity)|GO:0005634(nucleus)|GO:0005654(nucleoplasm)|GO:0005737(cytoplasm)|GO:0005886(plasma membrane)|GO:0006260(DNA replication)|GO:0006281(…	AAAGTGCCAGTTACTCCAGAATAACAAGCTAATGGAGGCAGGAACTCTTCAGAGAGACTC	5426	POLE	0
A_55_P2152862	1.73617	0.0287776	Ints10	integrator complex subunit 10	Mus musculus 10 days neonate cerebellum cDNA, RIKEN full-length enriched library, clone:B930018M20 product:hypothetical Tetratricopeptide repeat (TPR) structure containing protein, full insert sequence. [AK047093]		AK047093	70885	chr8	71346309	71346368	+	35132	85	258	A_55_P2152862	FALSE	Mm.252421			gb|AK047093|tc|TC1595091|riken|B930018M20|nap|NAP083566-1	chr8:71346309-71346368	mm|8qB3.3	GO:0003674(molecular_function)|GO:0005634(nucleus)|GO:0016180(snRNA processing)|GO:0032039(integrator complex)	CTTAGTGCATTTCTGCGGGAAAAGTGTTGCTTAAATTGGGATATTTTTGTTACTTTGGAA	55174	INTS10	0
A_55_P2330215	1.73529	0.0038012	A730090N16Rik	RIKEN cDNA A730090N16 gene	Mus musculus RIKEN cDNA A730090N16 gene (A730090N16Rik), long non-coding RNA [NR_040390]	NR_040390	NR_040390	319798	chr3	65128103	65128044	-	24069	119	80	A_55_P2330215	FALSE	Mm.445698			ref|NR_040390|gb|AK085325|tc|TC1599717|riken|D630011P15	chr3:65128103-65128044	mm|3qE1		GAAAGAATAATGAAAGTTAGAGCCAGATGCACTGACCAGTTGTAGGTACATGATATATAT			0
A_55_P2200429	1.73333	0.0361318	4930423D22Rik	RIKEN cDNA 4930423D22 gene	Mus musculus adult male testis cDNA, RIKEN full-length enriched library, clone:4930423D22 product:unclassifiable, full insert sequence. [AK015187]		AK015187	74634	chr12	82883910	82883969	+	8358	167	14	A_55_P2200429	FALSE				gb|AK015187|tc|TC1623240|riken|4930423D22|nap|NAP074040-1	chr12:82883910-82883969	mm|12qD1		GATTGCAGCTTTTTGAATTGTCATTTTTCTCCCCTACTCACGCGTGGCCATTTCCACACA			0
A_55_P2035102	1.73291	4.77078e-05	Odc1	ornithine decarboxylase, structural 1	Mus musculus ornithine decarboxylase, structural 1, mRNA (cDNA clone MGC:103389 IMAGE:6329274), complete cds. [BC083122]		BC083122	18263	chr12	17557836	17557895	+	6939	171	228	A_55_P2035102	FALSE	Mm.34102			gb|BC083122	chr17:093858678-093858619	mm|17qE5	GO:0001822(kidney development)|GO:0003824(catalytic activity)|GO:0004586(ornithine decarboxylase activity)|GO:0005737(cytoplasm)|GO:0005829(cytosol)|GO:0006595(polyamine metabolic process)|GO:0006596(polyamine biosynthetic process)|GO:0008284(positive regulation of cell proliferation)|GO:0009446(putrescine biosynthetic process)|GO:0016829(lyase activity)|GO:0016831(carboxy-lyase activity)|GO:0033…	CCAGAAGCGTATGTTGTGACCCATTGTGAAAATAAAGTATCTTGAAATAACTGGGAAAAA	4953	ODC1	0
A_51_P327206	1.73149	6.33459e-05	Mab21l2	mab-21-like 2 (C. elegans)	Mus musculus mab-21-like 2 (C. elegans) (Mab21l2), mRNA [NM_011839]	NM_011839	NM_011839	23937	chr3	86350340	86350281	-	62221	3	199	A_51_P327206	FALSE	Mm.389466	ENSMUST00000191695		ref|NM_011839|ens|ENSMUST00000191695|ens|ENSMUST00000077524|gb|BC046628	chr3:086350340-086350281	mm|3qF1	GO:0001654(eye development)|GO:0005634(nucleus)|GO:0007275(multicellular organismal development)|GO:0008284(positive regulation of cell proliferation)|GO:0010172(embryonic body morphogenesis)|GO:0043010(camera-type eye development)	TGCACAAAAATGATCGTTTCCTTCCAAACAATGTGAATTTAAAGATCGCACAAAAGAAGC	10586	MAB21L2	0
A_55_P2059686	1.7307	0.000197833	Rcc1	regulator of chromosome condensation 1	Mus musculus regulator of chromosome condensation 1 (Rcc1), transcript variant 1, mRNA [NM_001197082]	NM_001197082	NM_001197082	100088	chr4	131887967	131887908	-	39460	72	130	A_55_P2059686	FALSE	Mm.255045	ENSMUST00000105951		ref|NM_001197082|ref|NM_133878|ens|ENSMUST00000105951|ens|ENSMUST00000084250	chr4:131887967-131887908	mm|4qD2.3	GO:0000082(G1/S transition of mitotic cell cycle)|GO:0000790(nuclear chromatin)|GO:0000794(condensed nuclear chromosome)|GO:0003677(DNA binding)|GO:0003682(chromatin binding)|GO:0005085(guanyl-nucleotide exchange factor activity)|GO:0005087(Ran guanyl-nucleotide exchange factor activity)|GO:0005634(nucleus)|GO:0005654(nucleoplasm)|GO:0005737(cytoplasm)|GO:0007049(cell cycle)|GO:0007052(mitotic sp…	GGGGCGGAGGCTGGTCCTAAGGAAAGTAACAGTGGCTGAGAAAATAGTTTTGAATTTTTT	1104	RCC1	0
A_55_P2109439	1.73045	0.00844833	Lsmem1	leucine-rich single-pass membrane protein 1	Mus musculus leucine-rich single-pass membrane protein 1 (Lsmem1), mRNA [NM_001033437]	NM_001033437	NM_001033437	380755	chr12	40903054	40902995	-	62112	3	90	A_55_P2109439	FALSE	Mm.390463	ENSMUST00000095760		ref|NM_001033437|ens|ENSMUST00000095760|gb|AK142184|gb|AK134025	chr12:040903054-040902995	mm|12qB1	GO:0003674(molecular_function)|GO:0005737(cytoplasm)|GO:0008150(biological_process)|GO:0016020(membrane)|GO:0016021(integral to membrane)	GCAACGAGGGAATTATGTCTATTTATATATAATTTATAAACCCTGCTAGCTTCGTCATGC	286006	LSMEM1	0
A_55_P2174203	1.72825	0.000260782	Lims2	LIM and senescent cell antigen like domains 2	Mus musculus LIM and senescent cell antigen like domains 2 (Lims2), mRNA [NM_144862]	NM_144862	NM_144862	225341	chr18	32118211	32118270	+	62287	3	67	A_55_P2174203	FALSE	Mm.24551	ENSMUST00000025254		ref|NM_144862|ens|ENSMUST00000025254|ref|XM_011246899|ref|XM_006525845	chr18:032118211-032118270	mm|18qB1	GO:0003674(molecular_function)|GO:0005886(plasma membrane)|GO:0005925(focal adhesion)|GO:0008270(zinc ion binding)|GO:0016020(membrane)|GO:0016337(cell-cell adhesion)|GO:0030054(cell junction)|GO:0043066(negative regulation of apoptotic process)|GO:0045216(cell-cell junction organization)|GO:0046872(metal ion binding)|GO:0050680(negative regulation of epithelial cell proliferation)|GO:2000178(neg…	TGCCCTGGCCATCGAAGACCCACAAGTGGTCACATACTTACACAATGAAGGCTCATTCAC	55679	LIMS2	0
A_52_P196105	1.72821	0.000398414	Ttyh3	tweety homolog 3 (Drosophila)	Mus musculus tweety homolog 3 (Drosophila) (Ttyh3), transcript variant 2, mRNA [NM_175274]	NM_175274	NM_175274	78339	chr5	141096656	141096597	-	7149	171	135	A_52_P196105	FALSE	Mm.28947	ENSMUST00000042661		ref|NM_175274|ref|NM_001308040|ens|ENSMUST00000042661|ref|XM_006504769	chr5:141096656-141096597	mm|5qG2	GO:0005229(intracellular calcium activated chloride channel activity)|GO:0005254(chloride channel activity)|GO:0005886(plasma membrane)|GO:0006810(transport)|GO:0006811(ion transport)|GO:0006821(chloride transport)|GO:0016020(membrane)|GO:0016021(integral to membrane)|GO:0034707(chloride channel complex)|GO:0070062(extracellular vesicular exosome)	TGATTTTTATTTCTGTGGGGAACTTTATTTTTCTTGGCAAATAACTAAAGTTCTTGTCCA	80727	TTYH3	0
A_51_P112445	1.72791	5.62826e-05	Wdr3	WD repeat domain 3	Mus musculus WD repeat domain 3 (Wdr3), mRNA [NM_175552]	NM_175552	NM_175552	269470	chr3	99942517	99942458	-	15650	145	189	A_51_P112445	FALSE	Mm.24591	ENSMUST00000052120		ref|NM_175552|ens|ENSMUST00000052120|ref|XM_006501542|gb|AK050797	chr3:099942517-099942458	mm|3qF2.2	GO:0000462(maturation of SSU-rRNA from tricistronic rRNA transcript (SSU-rRNA, 5.8S rRNA, LSU-rRNA))|GO:0005634(nucleus)|GO:0005730(nucleolus)|GO:0008150(biological_process)|GO:0030515(snoRNA binding)|GO:0031965(nuclear membrane)|GO:0032040(small-subunit processome)|GO:0034388(Pwp2p-containing subcomplex of 90S preribosome)	AAAGATCATGTTGTAGATCTTGGGGTACAGATGTCAGCCTTGGTTGAAGAAACCAACATG	10885	WDR3	0
A_55_P2053823	1.72757	0.0662326	Iqcf4	IQ motif containing F4	Mus musculus IQ motif containing F4 (Iqcf4), mRNA [NM_026090]	NM_026090	NM_026090	67320	chr9	106472987	106472928	-	47567	47	316	A_55_P2053823	FALSE	Mm.335431	ENSMUST00000085111		ref|NM_026090|ens|ENSMUST00000085111|gb|AK006688|gb|BC048652	chr9:106472987-106472928	mm|9qF1	GO:0003674(molecular_function)|GO:0005575(cellular_component)|GO:0008150(biological_process)	TCTATGACATAAAGGAAACAAGGAAACAACAGCAAAAGGAAAAGGAAAAGGAAGAGGAAG			0
A_52_P19532	1.72742	0.00165929	Fgd3	FYVE, RhoGEF and PH domain containing 3	Mus musculus FYVE, RhoGEF and PH domain containing 3 (Fgd3), mRNA [NM_015759]	NM_015759	NM_015759	30938	chr13	49372982	49372923	-	14709	148	103	A_52_P19532	FALSE	Mm.291089	ENSMUST00000110086		ref|NM_015759|ens|ENSMUST00000110086|ens|ENSMUST00000048716|ref|XM_006516929	chr13:049372982-049372923	mm|13qA5	GO:0005085(guanyl-nucleotide exchange factor activity)|GO:0005089(Rho guanyl-nucleotide exchange factor activity)|GO:0005737(cytoplasm)|GO:0005856(cytoskeleton)|GO:0035023(regulation of Rho protein signal transduction)|GO:0046847(filopodium assembly)|GO:0046872(metal ion binding)	CAAGATATTGTGAAACCAAACGCAGCCTGCACGTTCATCATAACAGGAAGAAAAAGGTCC	89846	FGD3	0
A_66_P109395	1.72738	0.00018541	Rpia	ribose 5-phosphate isomerase A	Mus musculus ribose 5-phosphate isomerase A (Rpia), mRNA [NM_009075]	NM_009075	NM_009075	19895	chr6	70716072	70716013	-	17268	140	233	A_66_P109395	FALSE	Mm.17905			ref|NM_009075|gb|AK148291|gb|L35034|gb|BC053526	chr6:070716072-070716013	mm|6qC1	GO:0004751(ribose-5-phosphate isomerase activity)|GO:0006098(pentose-phosphate shunt)|GO:0009052(pentose-phosphate shunt, non-oxidative branch)|GO:0016853(isomerase activity)|GO:0019693(ribose phosphate metabolic process)|GO:0030246(carbohydrate binding)|GO:0043231(intracellular membrane-bounded organelle)|GO:0048029(monosaccharide binding)	TCATTGTTACCACTCCCAAATCTTAGTTACATTTTAAGATCAGGTGTAGGGAATTGTGAA	22934	RPIA	0
A_52_P6828	1.72475	0.000573057	Xk	Kell blood group precursor (McLeod phenotype) homolog	Mus musculus Kell blood group precursor (McLeod phenotype) homolog (Xk), mRNA [NM_023500]	NM_023500	NM_023500	22439	chrX	8890144	8890203	+	36100	82	290	A_52_P6828	FALSE	Mm.56468	ENSMUST00000015486		ref|NM_023500|ens|ENSMUST00000015486|gb|BC054851|tc|TC1622655	chrX:008890144-008890203	mm|XqA1.1	GO:0005623(cell)|GO:0006810(transport)|GO:0006865(amino acid transport)|GO:0006874(cellular calcium ion homeostasis)|GO:0008361(regulation of cell size)|GO:0010961(cellular magnesium ion homeostasis)|GO:0016020(membrane)|GO:0016021(integral to membrane)|GO:0031133(regulation of axon diameter)|GO:0042552(myelination)|GO:0048741(skeletal muscle fiber development)	AATGTGAATGTAATCTGTACAGTTTTGTAAACGGAAAAATAAGCTTAGTATTGATTGTCT	7504	XK	0
A_55_P2244440	1.72456	0.0176069	Zgrf1	zinc finger, GRF-type containing 1	Mus musculus zinc finger, GRF-type containing 1 (Zgrf1), mRNA [NM_197997]	NM_197997	NM_197997	71643	chr3	127263827	127263886	+	47779	47	219	A_55_P2244440	FALSE	Mm.274884	ENSMUST00000043108		ref|NM_197997|ens|ENSMUST00000043108|ref|XM_006502113|ref|XM_006502112	chr3:127263827-127263886	mm|3qG2	GO:0003674(molecular_function)|GO:0005575(cellular_component)|GO:0008150(biological_process)|GO:0008270(zinc ion binding)|GO:0016020(membrane)|GO:0016021(integral to membrane)	ATGACTTGGAAAGTGAGCGGTATTTAATCACAGTTGAGGAGGCTAAGGCTGTTGGAAGCA	55345	ZGRF1	0
A_55_P1953593	1.72392	6.48316e-05	Ece2	endothelin converting enzyme 2	Mus musculus endothelin converting enzyme 2 (Ece2), transcript variant 3, mRNA [NM_025462]	NM_025462	NM_025462	107522	chr16	20618872	20618931	+	46911	49	316	A_55_P1953593	FALSE	Mm.263319	ENSMUST00000115522		ref|NM_025462|ens|ENSMUST00000115522|gb|BC115542|gb|BC115541	chr16:020618872-020618931	mm|16qB1	GO:0000179(rRNA (adenine-N6,N6-)-dimethyltransferase activity)|GO:0003824(catalytic activity)|GO:0003880(protein C-terminal carboxyl O-methyltransferase activity)|GO:0004222(metalloendopeptidase activity)|GO:0004809(tRNA (guanine-N2-)-methyltransferase activity)|GO:0005794(Golgi apparatus)|GO:0005802(trans-Golgi network)|GO:0006508(proteolysis)|GO:0008152(metabolic process)|GO:0008168(methyltrans…	TAAAACAGTGCCAGTGGGATCAAGCCCATGTGAACCAATACAGTGTGAGTCCAACTAAAT	9718	ECE2	0
A_51_P451151	1.72336	4.87613e-05	Ube2c	ubiquitin-conjugating enzyme E2C	Mus musculus ubiquitin-conjugating enzyme E2C (Ube2c), mRNA [NM_026785]	NM_026785	NM_026785	68612	chr2	164598016	164598075	+	18697	135	328	A_51_P451151	FALSE	Mm.89830	ENSMUST00000088248		ref|NM_026785|ens|ENSMUST00000088248|gb|AK136186|gb|BC147032	chr2:164598016-164598075	mm|2qH3	GO:0000166(nucleotide binding)|GO:0000209(protein polyubiquitination)|GO:0004842(ubiquitin-protein ligase activity)|GO:0005524(ATP binding)|GO:0005634(nucleus)|GO:0005680(anaphase-promoting complex)|GO:0005737(cytoplasm)|GO:0006511(ubiquitin-dependent protein catabolic process)|GO:0007049(cell cycle)|GO:0007067(mitosis)|GO:0008054(cyclin catabolic process)|GO:0010458(exit from mitosis)|GO:0010994…	ACCTGCAAGAAACCTATTCAAAGCAGGTCTCCAGCCAAGATCCCTGATGCAAGCTGGCCG	11065	UBE2C	0
A_55_P2167323	1.72306	0.000889553	Cort	cortistatin	Mus musculus cortistatin (Cort), mRNA [NM_007745]	NM_007745	NM_007745	12854	chr4	148499359	148499300	-	16154	143	166	A_55_P2167323	FALSE	Mm.6204	ENSMUST00000030815		ref|NM_007745|ens|ENSMUST00000030815|gb|AK013496|gb|AF013253	chr4:148499359-148499300	mm|4qE2	GO:0001664(G-protein coupled receptor binding)|GO:0005179(hormone activity)|GO:0005184(neuropeptide hormone activity)|GO:0005576(extracellular region)|GO:0007193(adenylate cyclase-inhibiting G-protein coupled receptor signaling pathway)|GO:0007218(neuropeptide signaling pathway)|GO:0045187(regulation of circadian sleep/wake cycle, sleep)	ATAGCACCCTGGCCACCCTGTGAGATGCCAACGAGACCTGAATAAAGACTGTCAATCAGC	1325	CORT	0
A_51_P391367	1.72174	1.52759e-05	Tfap4	transcription factor AP4	Mus musculus transcription factor AP4 (Tfap4), mRNA [NM_031182]	NM_031182	NM_031182	83383	chr16	4544770	4544711	-	32444	94	57	A_51_P391367	FALSE	Mm.273210	ENSMUST00000005862		ref|NM_031182|ens|ENSMUST00000005862|ref|XM_011246047|ref|XM_006522765	chr16:004544770-004544711	mm|16qA1	GO:0000978(RNA polymerase II core promoter proximal region sequence-specific DNA binding)|GO:0001077(RNA polymerase II core promoter proximal region sequence-specific DNA binding transcription factor activity involved in positive regulation of transcription)|GO:0003677(DNA binding)|GO:0003705(RNA polymerase II distal enhancer sequence-specific DNA binding transcription factor activity)|GO:0005515…	AGGAGAAGCTATTATATTTTGTTAAGAAAATGGGGGTAGGGAACAAAATACCAAGAGGCC	7023	TFAP4	0
A_51_P364786	1.72136	0.00493709	U2af1	U2 small nuclear ribonucleoprotein auxiliary factor (U2AF) 1	Mus musculus U2 small nuclear ribonucleoprotein auxiliary factor (U2AF) 1 (U2af1), transcript variant 1, mRNA [NM_024187]	NM_024187	NM_024187	108121	chr17	31795601	31791956	-	21650	126	326	A_51_P364786	FALSE	Mm.379289	ENSMUST00000089221		ref|NM_024187|ref|NM_001163769|ens|ENSMUST00000089221|ens|ENSMUST00000014684	chr17:003044693-003044634	mm|17qA1	GO:0000166(nucleotide binding)|GO:0003676(nucleic acid binding)|GO:0003723(RNA binding)|GO:0005515(protein binding)|GO:0005634(nucleus)|GO:0005681(spliceosomal complex)|GO:0006397(mRNA processing)|GO:0008380(RNA splicing)|GO:0016607(nuclear speck)|GO:0046872(metal ion binding)|GO:0050733(RS domain binding)	ACAAAGTCAACTGTTCATTTTATTTCAAAATCGGAGCATGTCGTCATGGAGACAGATGTT	7307	U2AF1	0
A_55_P2057040	1.72084	0.000380427	Ppp1r16b	protein phosphatase 1, regulatory (inhibitor) subunit 16B	Mus musculus protein phosphatase 1, regulatory (inhibitor) subunit 16B (Ppp1r16b), transcript variant 1, mRNA [NM_001159662]	NM_001159662	NM_001159662	228852	chr2	158588550	158588609	+	20891	129	203	A_55_P2057040	FALSE	Mm.150540	ENSMUST00000052927		ref|NM_001159662|ref|NM_153089|ens|ENSMUST00000052927|ens|ENSMUST00000045503	chr2:158588550-158588609	mm|2qH1	GO:0001938(positive regulation of endothelial cell proliferation)|GO:0005634(nucleus)|GO:0005886(plasma membrane)|GO:0008599(protein phosphatase type 1 regulator activity)|GO:0014066(regulation of phosphatidylinositol 3-kinase cascade)|GO:0016020(membrane)|GO:0035307(positive regulation of protein dephosphorylation)|GO:0035308(negative regulation of protein dephosphorylation)|GO:0042995(cell proj…	AGGGAGAAGGTGAACGCATTGCTGAGAACACCATGGTTAACATTGACATAACAGCATCCT	26051	PPP1R16B	0
A_66_P128434	1.72026	0.00576311	Kit	kit oncogene	Mus musculus kit oncogene (Kit), transcript variant 1, mRNA [NM_001122733]	NM_001122733	NM_001122733	16590	chr5	76052394	76052453	+	12027	156	219	A_66_P128434	FALSE	Mm.247073	ENSMUST00000144270		ref|NM_001122733|ref|NM_021099|ens|ENSMUST00000144270|gb|Y00864	chr5:076052394-076052453	mm|5qC3.3	GO:0000166(nucleotide binding)|GO:0000187(activation of MAPK activity)|GO:0001541(ovarian follicle development)|GO:0001669(acrosomal vesicle)|GO:0002020(protease binding)|GO:0002318(myeloid progenitor cell differentiation)|GO:0002320(lymphoid progenitor cell differentiation)|GO:0002327(immature B cell differentiation)|GO:0002371(dendritic cell cytokine production)|GO:0002551(mast cell chemotaxis)…	GTCAGGTACTTAAGGGGCCACACCATTGAGAATTTTGTCTTGGATATTCTTGAAAGTTTA	3815	KIT	0
A_55_P2200029	1.72021	0.00814924	Dleu2	deleted in lymphocytic leukemia, 2	Mus musculus adult male cortex cDNA, RIKEN full-length enriched library, clone:7730401J12 product:inferred: deleted in lymphocytic leukemia, 2, full insert sequence. [AK033078]		AK033078	668253	chr14	62237336	62237277	-	12246	155	110	A_55_P2200029	FALSE	Mm.483605			gb|AK033078|tc|TC1652557|riken|7730401J12|nap|NAP013319-001	chr14:62237336-62237277	mm|14qD1	GO:0003674(molecular_function)|GO:0005575(cellular_component)|GO:0010977(negative regulation of neuron projection development)|GO:0014043(negative regulation of neuron maturation)	TTTCAGGTTTTGTAACAGTTCAGTAGTTAAAAGCACTTGTGGGCTGGAGAGACACCTCGG			0
A_55_P2156016	1.71909	6.08324e-05	Recql4	RecQ protein-like 4	Mus musculus RecQ protein-like 4 (Recql4), mRNA [NM_058214]	NM_058214	NM_058214	79456	chr15	76534043	76533984	-	30189	100	304	A_55_P2156016	FALSE	Mm.18373	ENSMUST00000036852		ref|NM_058214|ens|ENSMUST00000036852|gb|BC064680|tc|TC1597177	chr15:076534043-076533984	mm|15qD3	GO:0000166(nucleotide binding)|GO:0000405(bubble DNA binding)|GO:0000733(DNA strand renaturation)|GO:0001501(skeletal system development)|GO:0003676(nucleic acid binding)|GO:0004386(helicase activity)|GO:0005524(ATP binding)|GO:0005634(nucleus)|GO:0005737(cytoplasm)|GO:0006260(DNA replication)|GO:0006310(DNA recombination)|GO:0008026(ATP-dependent helicase activity)|GO:0008270(zinc ion binding)|G…	TGGCTGCAGGAAGGGGATAAGAAGATCCAAACTGCAGAATAAAAAGCATTCAGTAATTTT	9401	RECQL4	0
A_55_P1981322	1.71829	0.0259959	Grhl2	grainyhead-like 2 (Drosophila)	Mus musculus grainyhead-like 2 (Drosophila) (Grhl2), mRNA [NM_026496]	NM_026496	NM_026496	252973	chr15	37293139	37293198	+	35040	86	113	A_55_P1981322	FALSE	Mm.244612	ENSMUST00000161933		ref|NM_026496|ens|ENSMUST00000161933|ens|ENSMUST00000022895|ref|XM_006520062	chr15:037293139-037293198	mm|15qB3.1	GO:0001161(intronic transcription regulatory region sequence-specific DNA binding)|GO:0001701(in utero embryonic development)|GO:0001843(neural tube closure)|GO:0003208(cardiac ventricle morphogenesis)|GO:0003382(epithelial cell morphogenesis)|GO:0003677(DNA binding)|GO:0003700(sequence-specific DNA binding transcription factor activity)|GO:0005634(nucleus)|GO:0005911(cell-cell junction)|GO:00063…	CCCTTTCTGAAGGACAAGCAGGGGAGACTCGTGTGTACAATCTGTTCCCACATTAAAAAA	79977	GRHL2	0
A_55_P2166508	1.71796	0.00337311	Gpr6	G protein-coupled receptor 6	Mus musculus G protein-coupled receptor 6 (Gpr6), mRNA [NM_199058]	NM_199058	NM_199058	140741	chr10	40790384	40790325	-	20786	129	86	A_55_P2166508	FALSE	Mm.290693	ENSMUST00000061796		ref|NM_199058|ens|ENSMUST00000061796|ref|XM_006512533|gb|AY064488	chr10:040790384-040790325	mm|10qB1	GO:0003376(sphingosine-1-phosphate signaling pathway)|GO:0004871(signal transducer activity)|GO:0004930(G-protein coupled receptor activity)|GO:0005623(cell)|GO:0005829(cytosol)|GO:0005886(plasma membrane)|GO:0007165(signal transduction)|GO:0007186(G-protein coupled receptor signaling pathway)|GO:0007204(elevation of cytosolic calcium ion concentration)|GO:0016020(membrane)|GO:0016021(integral to…	AGATCCAGCGTGCCTTGTGGCTCCTGTTCTGTGGCTGTTTCCAATCCAAAGTGCCCTTCC	2830	GPR6	0
A_52_P208649	1.71735	0.0186547	Cartpt	CART prepropeptide	Mus musculus CART prepropeptide (Cartpt), transcript variant 1, mRNA [NM_013732]	NM_013732	NM_013732	27220	chr13	100669956	100668967	-	13573	151	80	A_52_P208649	FALSE	Mm.75498	ENSMUST00000022150		ref|NM_013732|ref|NM_001081493|ens|ENSMUST00000022150|gb|AK135007	unmapped		GO:0000186(activation of MAPKK activity)|GO:0001678(cellular glucose homeostasis)|GO:0005184(neuropeptide hormone activity)|GO:0005576(extracellular region)|GO:0005615(extracellular space)|GO:0007186(G-protein coupled receptor signaling pathway)|GO:0007218(neuropeptide signaling pathway)|GO:0007268(synaptic transmission)|GO:0008343(adult feeding behavior)|GO:0009267(cellular response to starvatio…	AAACGCATTCCGATCTACGAGAAGAAGTACGGCCAAGTCCCCATGTGTGACGCTGGAGAG	9607	CARTPT	0
A_51_P417321	1.71729	1.52521e-05	Zfp236	zinc finger protein 236	Mus musculus zinc finger protein 236 (Zfp236), mRNA [NM_177832]	NM_177832	NM_177832	329002	chr18	82765067	82765008	-	24209	119	127	A_51_P417321	FALSE	Mm.34438	ENSMUST00000183324		ref|NM_177832|ens|ENSMUST00000183324|ens|ENSMUST00000171071|ref|XM_011247084	chr18:082765067-082765008	mm|18qE3	GO:0003674(molecular_function)|GO:0005575(cellular_component)|GO:0008150(biological_process)	CATTCCTTGACAATACAAGGTTTTGAGAAGATAACTCACTTGAATATTGTGGTTTACAGG	7776	ZNF236	0
A_55_P2258757	1.71716	0.00107276	1700042O10Rik	RIKEN cDNA 1700042O10 gene	Mus musculus RIKEN cDNA 1700042O10 gene (1700042O10Rik), long non-coding RNA [NR_045178]	NR_045178	NR_045178	73321	chr11	11785261	11785320	+	37312	79	161	A_55_P2258757	FALSE	Mm.443306			ref|NR_045178|gb|AK006690|tc|TC1599594|riken|1700042O10	chr11:11785261-11785320	mm|11qA1		CTGTTCCACTGTTGTCATTTGGTAACCGAGAATAAGTGAATAAATAAATGAATGAATCCG			0
A_55_P2117243	1.71698	9.20978e-06	Npm1	nucleophosmin 1	Mus musculus nucleophosmin 1 (Npm1), transcript variant 3, mRNA [NM_001252261]	NM_001252261	NM_001252261	18148	chr11	33055085	33055026	-	11299	158	36	A_55_P2117243	FALSE	Mm.485384	ENSMUST00000109354		ref|NM_001252261|ens|ENSMUST00000109354|gb|AK088923|gb|AK184065	chr10:056218036-056218095	mm|10qB4	GO:0000055(ribosomal large subunit export from nucleus)|GO:0000056(ribosomal small subunit export from nucleus)|GO:0001652(granular component)|GO:0003676(nucleic acid binding)|GO:0003677(DNA binding)|GO:0003713(transcription coactivator activity)|GO:0003723(RNA binding)|GO:0004860(protein kinase inhibitor activity)|GO:0005515(protein binding)|GO:0005547(phosphatidylinositol-3,4,5-trisphosphate bi…	TTGCAGGCTGGAAGCAATCTTGTTTTTCCTAAAGCACTTTTCTTTTACTCTTGTGATGCA	4869	NPM1	0
A_55_P2091596	1.71641	0.0226759	4933407I18Rik	RIKEN cDNA 4933407I18 gene	Mus musculus 17 days embryo head cDNA, RIKEN full-length enriched library, clone:3322401D19 product:hypothetical protein, full insert sequence. [AK132182]		AK132182	71121	chr9	59531295	59531354	+	49731	41	251	A_55_P2091596	FALSE	Mm.483106			gb|AK132182|gb|XR_108093|tc|TC1594097|riken|3322401D19	chr9:59531295-59531354	mm|9qB		ATTATTGATTTTTCAGACGGGACCTCATGTCACCAGGGCTAGTCTTATACTTCATATGGC			0
A_51_P519040	1.71608	0.0038824	D430041D05Rik	RIKEN cDNA D430041D05 gene	Mus musculus RIKEN cDNA D430041D05 gene (D430041D05Rik), mRNA [NM_001033347]	NM_001033347	NM_001033347	241589	chr2	103988109	103988050	-	30354	100	301	A_51_P519040	FALSE	Mm.358909	ENSMUST00000136156		ref|NM_001033347|ens|ENSMUST00000136156|ens|ENSMUST00000141159|ens|ENSMUST00000089726	chr2:103988109-103988050	mm|2qE2	GO:0002230(positive regulation of defense response to virus by host)|GO:0003674(molecular_function)|GO:0005575(cellular_component)	TTTTGCTTTGTCCATATTGAGGATGGCTTGAGAACCTGGCCAACCAGAGGGAACAATAGA	25758	KIAA1549L	0
A_55_P1991693	1.71605	0.000252928	Pprc1	peroxisome proliferative activated receptor, gamma, coactivator-related 1	Mus musculus peroxisome proliferative activated receptor, gamma, coactivator-related 1 (Pprc1), mRNA [NM_001081214]	NM_001081214	NM_001081214	226169	chr19	46147311	46147370	+	36392	82	33	A_55_P1991693	FALSE	Mm.2415			ref|NM_001081214|gb|AK122322|gb|AK044522|gb|BC013720	chr19:046147311-046147370	mm|19qC3	GO:0000166(nucleotide binding)|GO:0001104(RNA polymerase II transcription cofactor activity)|GO:0003676(nucleic acid binding)|GO:0003723(RNA binding)|GO:0005634(nucleus)|GO:0005654(nucleoplasm)|GO:0006351(transcription, DNA-dependent)|GO:0006355(regulation of transcription, DNA-dependent)|GO:0006366(transcription from RNA polymerase II promoter)|GO:0008134(transcription factor binding)|GO:0030374…	GGTTTTTAATAACAGGTGTTGAACAAATTAACTTGAATTTCTATGTAAGGTGGTGGGGGG	23082	PPRC1	0
A_55_P1996716	1.71587	1.41622e-06	Cachd1	cache domain containing 1	Mus musculus cache domain containing 1 (Cachd1), mRNA [NM_198037]	NM_198037	NM_198037	320508	chr4	100676283	100676342	+	14186	149	166	A_55_P1996716	FALSE	Mm.151962	ENSMUST00000030257		ref|NM_198037|ens|ENSMUST00000030257|gb|BC058676|gb|BC057356	chr4:100676283-100676342	mm|4qC6	GO:0003674(molecular_function)|GO:0005575(cellular_component)|GO:0006810(transport)|GO:0006811(ion transport)|GO:0006816(calcium ion transport)|GO:0008150(biological_process)|GO:0016020(membrane)|GO:0016021(integral to membrane)	AATTTAACTGGTGATCTGCCCACTGTCCTCATCCACAAAACACACAAACAAACAAACAAA	57685	CACHD1	0
A_55_P2085485	1.71507	3.10279e-05	Pidd1	p53 induced death domain protein 1	Mus musculus p53 induced death domain protein 1 (Pidd1), mRNA [NM_022654]	NM_022654	NM_022654	57913	chr7	148624475	148624416	-	43195	61	203	A_55_P2085485	FALSE	Mm.334321	ENSMUST00000106005		ref|NM_022654|ens|ENSMUST00000106005|ens|ENSMUST00000138065|ens|ENSMUST00000147268	chr7:148624475-148624416	mm|7qF5	GO:0005515(protein binding)|GO:0005634(nucleus)|GO:0005737(cytoplasm)|GO:0005794(Golgi apparatus)|GO:0006915(apoptotic process)|GO:0006919(activation of cysteine-type endopeptidase activity involved in apoptotic process)|GO:0006974(response to DNA damage stimulus)|GO:0006977(DNA damage response, signal transduction by p53 class mediator resulting in cell cycle arrest)|GO:0007165(signal transducti…	AATTAAGATAGCTTTAAACTTGACTCGACCAGTGGGCAGAGCCCTATCCTTCTACCTCAC	55367	PIDD1	0
A_55_P2021393	1.71491	0.00915712	Vmn2r65	vomeronasal 2, receptor 65	Mus musculus vomeronasal 2, receptor 65 (Vmn2r65), mRNA [NM_001105180]	NM_001105180	NM_001105180	100009609	chr7	92091726	92091667	-	8645	166	96	A_55_P2021393	FALSE	Mm.389926	ENSMUST00000044583		ref|NM_001105180|ens|ENSMUST00000044583|gb|AB194095|tc|NP1404796	chr7:092091726-092091667	mm|7qD3	GO:0003674(molecular_function)|GO:0005575(cellular_component)|GO:0008150(biological_process)	TTCATTCAGAAAGGAAAGGCTGTCTGCTGTTTTGATTGTACCCCATGTCCAGAGAATGAA			0
A_55_P2129467	1.71487	7.48061e-05	4930555G01Rik	RIKEN cDNA 4930555G01 gene	Mus musculus RIKEN cDNA 4930555G01 gene (4930555G01Rik), mRNA [NM_175393]	NM_175393	NM_175393	108978	chr14	5162071	5162130	+	22885	123	151	A_55_P2129467	FALSE	Mm.396152			ref|NM_175393|gb|AK076920|tc|TC1592418|riken|4930555G01	chr14:008018639-008018580	mm|14qA1	GO:0003674(molecular_function)|GO:0005575(cellular_component)|GO:0008150(biological_process)	CGTTCCCTCAAATATACAATCACTGGAAACTGCAAGTAGAGATAATAAATTCCACAATCT			0
A_55_P1954001	1.71487	0.0333232	Snrpc	U1 small nuclear ribonucleoprotein C	Mus musculus U1 small nuclear ribonucleoprotein C (Snrpc), mRNA [NM_011432]	NM_011432	NM_011432	20630	chr17	27988801	27988860	+	43069	61	128	A_55_P1954001	FALSE	Mm.308514	ENSMUST00000071006		ref|NM_011432|ens|ENSMUST00000071006|ens|ENSMUST00000137581|gb|AK137213	chr17:027988801-027988860	mm|17qA3.3	GO:0000387(spliceosomal snRNP assembly)|GO:0000398(nuclear mRNA splicing, via spliceosome)|GO:0003676(nucleic acid binding)|GO:0003723(RNA binding)|GO:0005634(nucleus)|GO:0005685(U1 snRNP)|GO:0008270(zinc ion binding)|GO:0030529(ribonucleoprotein complex)|GO:0046872(metal ion binding)	GGAAACTTCCCTTCCTAACTGAATATTTTTGGAGGGAGAAATAATACAAAAAAGTGCAGT	6631	SNRPC	0
A_65_P08864	1.71477	0.00146453	Dph5	DPH5 homolog (S. cerevisiae)	Mus musculus 4 days neonate thymus cDNA, RIKEN full-length enriched library, clone:B630008G01 product:Weakly similar to putative diphthine synthase, full insert sequence. [AK046753]		AK046753	69740	chr3	115603768	115603827	+	34777	86	312	A_65_P08864	FALSE	Mm.5915			gb|AK046753|gb|AK045127|gb|AK045548|tc|TC1584861	chr3:115603768-115603827	mm|3qG1	GO:0003674(molecular_function)|GO:0004164(diphthine synthase activity)|GO:0005575(cellular_component)|GO:0008152(metabolic process)|GO:0008168(methyltransferase activity)|GO:0016740(transferase activity)|GO:0017183(peptidyl-diphthamide biosynthetic process from peptidyl-histidine)|GO:0032259(methylation)	AATTTGATTGTGAAGAATCACATAAAACATTTACACGAGTCTGTTTGGTACTTAACCCCG	51611	DPH5	0
A_51_P226134	1.71437	0.00139978	Fastkd2	FAST kinase domains 2	Mus musculus FAST kinase domains 2 (Fastkd2), mRNA [NM_172422]	NM_172422	NM_172422	75619	chr1	63799261	63799320	+	25692	114	114	A_51_P226134	FALSE	Mm.30965			ref|NM_172422|gb|AK084971|tc|TC1576086|riken|D430020D19	chr1:063799261-063799320	mm|1qC2	GO:0004672(protein kinase activity)|GO:0005739(mitochondrion)|GO:0045333(cellular respiration)	AAAGCTGCTTTCTTAGTTGTGTTATGATAGGTCACATGTAAGTTTGTGTTGGGAGTTTGA	22868	FASTKD2	0
A_55_P2056186	1.71387	3.87652e-05	Siva1	SIVA1, apoptosis-inducing factor	Mus musculus SIVA1, apoptosis-inducing factor (Siva1), transcript variant 1, mRNA [NM_013929]	NM_013929	NM_013929	30954	chr12	113887275	113887334	+	21971	126	11	A_55_P2056186	FALSE	Mm.289812	ENSMUST00000021728		ref|NM_013929|ref|NM_001161737|ens|ENSMUST00000021728|ens|ENSMUST00000109755	chr12:113887275-113887334	mm|12qF1	GO:0001618(viral receptor activity)|GO:0005164(tumor necrosis factor receptor binding)|GO:0005175(CD27 receptor binding)|GO:0005634(nucleus)|GO:0005654(nucleoplasm)|GO:0005737(cytoplasm)|GO:0005739(mitochondrion)|GO:0006915(apoptotic process)|GO:0006924(activation-induced cell death of T cells)|GO:0008270(zinc ion binding)|GO:0032088(negative regulation of NF-kappaB transcription factor activity)…	CACACTAAAGAGAGAGAAGGTGGCTTTTTATATGTTATGTTTTATACCCAGTAACAAGTG	10572	SIVA1	0
A_55_P1968443	1.71386	0.00343997	Naaladl1	N-acetylated alpha-linked acidic dipeptidase-like 1	Mus musculus N-acetylated alpha-linked acidic dipeptidase-like 1 (Naaladl1), mRNA [NM_001009546]	NM_001009546	NM_001009546	381204	chr19	6115446	6115505	+	44484	57	249	A_55_P1968443	FALSE	Mm.359041	ENSMUST00000044451		ref|NM_001009546|ens|ENSMUST00000044451|gb|BC148525|tc|TC1689239	chr19:006115446-006115505	mm|19qA	GO:0003674(molecular_function)|GO:0003824(catalytic activity)|GO:0004180(carboxypeptidase activity)|GO:0005575(cellular_component)|GO:0005886(plasma membrane)|GO:0006508(proteolysis)|GO:0008150(biological_process)|GO:0008152(metabolic process)|GO:0008233(peptidase activity)|GO:0008237(metallopeptidase activity)|GO:0016020(membrane)|GO:0016021(integral to membrane)|GO:0016787(hydrolase activity)|G…	AAATCAACTCCGGATCTGAAGCTTGGGCTGAAGTACAGAGGCAGCTTAGCATTGTAGTAA	10004	NAALADL1	0
A_66_P134481	1.71279	7.72266e-05	Skp2	S-phase kinase-associated protein 2 (p45)	Mus musculus S-phase kinase-associated protein 2 (p45) (Skp2), transcript variant 1, mRNA [NM_013787]	NM_013787	NM_013787	27401	chr15	9042147	9042088	-	27156	110	137	A_66_P134481	FALSE	Mm.35584	ENSMUST00000110585		ref|NM_013787|ref|NM_001285980|ens|ENSMUST00000110585|ens|ENSMUST00000096482	chr15:009042147-009042088	mm|15qA1	GO:0000082(G1/S transition of mitotic cell cycle)|GO:0000086(G2/M transition of mitotic cell cycle)|GO:0000209(protein polyubiquitination)|GO:0005515(protein binding)|GO:0005634(nucleus)|GO:0005730(nucleolus)|GO:0005737(cytoplasm)|GO:0006511(ubiquitin-dependent protein catabolic process)|GO:0016235(aggresome)|GO:0019005(SCF ubiquitin ligase complex)|GO:0033148(positive regulation of intracellular…	AAAGAATTAAGGCAGTTACCTCTGTAGAGTATTTCCGTGCTACAATCCATTTCTATTAAC	6502	SKP2	0
A_55_P2177198	1.71263	0.00194169	Hist1h2bb	histone cluster 1, H2bb	Mus musculus histone cluster 1, H2bb (Hist1h2bb), mRNA [NM_175664]	NM_175664	NM_175664	319178	chr13	23838639	23838698	+	48871	44	3	A_55_P2177198	FALSE	Mm.390567			ref|NM_175664|gb|BC116853|gb|BC116857	chr13:023838639-023838698	mm|13qA3.1	GO:0000786(nucleosome)|GO:0000788(nuclear nucleosome)|GO:0003677(DNA binding)|GO:0005634(nucleus)|GO:0005694(chromosome)|GO:0006334(nucleosome assembly)|GO:0046982(protein heterodimerization activity)	TTTTGTGTGTCTTCTTTTGAACAGAATGCCAGAGCCTTCTAAGTCTGCACCAGCCCCTAA	3018	HIST1H2BB	0
A_55_P1996946	1.71253	0.000152758	Cdc20	cell division cycle 20	Mus musculus cell division cycle 20 (Cdc20), mRNA [NM_023223]	NM_023223	NM_023223	107995	chr4	118105593	118105534	-	24925	117	7	A_55_P1996946	FALSE	Mm.289747	ENSMUST00000006565		ref|NM_023223|ens|ENSMUST00000006565|gb|AK083459|gb|AK011723	chr4:118105593-118105534	mm|4qD2.1	GO:0005515(protein binding)|GO:0005634(nucleus)|GO:0005654(nucleoplasm)|GO:0005680(anaphase-promoting complex)|GO:0005737(cytoplasm)|GO:0005813(centrosome)|GO:0005856(cytoskeleton)|GO:0007049(cell cycle)|GO:0007067(mitosis)|GO:0007399(nervous system development)|GO:0008022(protein C-terminus binding)|GO:0008284(positive regulation of cell proliferation)|GO:0019899(enzyme binding)|GO:0030154(cell …	GCCTCATCCACCAAGGCATCCGTTGAACAAACGCATTTCCTTTCTTGTTTTTATTTTATT	991	CDC20	0
A_55_P2423463	1.71162	2.13819e-05	5730433K22Rik	RIKEN cDNA 5730433K22 gene	Mus musculus 8 days embryo whole body cDNA, RIKEN full-length enriched library, clone:5730433K22 product:unclassifiable, full insert sequence. [AK017611]		AK017611	70532	chr6	100518366	100518307	-	59527	11	12	A_55_P2423463	FALSE				gb|AK017611|tc|TC1709071|riken|5730433K22|nap|NAP073042-1	chr6:100518366-100518307	mm|6qD3		GGGTGTTTTTCACACCTGCCAATGGAAAATATATTTTCTTTGTAGGAAACAGTTTCTGTT			0
A_51_P130666	1.71115	2.32872e-05	Adk	adenosine kinase	Mus musculus adenosine kinase (Adk), transcript variant 1, mRNA [NM_134079]	NM_134079	NM_134079	11534	chr14	22267635	22267694	+	3299	182	292	A_51_P130666	FALSE	Mm.188734	ENSMUST00000045376		ref|NM_134079|ref|NM_001243041|ens|ENSMUST00000045376|gb|AK160264	chr14:022267635-022267694	mm|14qA3	GO:0000166(nucleotide binding)|GO:0004001(adenosine kinase activity)|GO:0005524(ATP binding)|GO:0005634(nucleus)|GO:0005654(nucleoplasm)|GO:0005737(cytoplasm)|GO:0005829(cytosol)|GO:0006166(purine ribonucleoside salvage)|GO:0006167(AMP biosynthetic process)|GO:0006175(dATP biosynthetic process)|GO:0010613(positive regulation of cardiac muscle hypertrophy)|GO:0016301(kinase activity)|GO:0016310(ph…	ACCAATTATTCCTTATAAGCTCTTCCATGTGCTTCAGACATCTGATGGACTTGGGGCAGC	132	ADK	0
A_55_P2126368	1.7106	0.000164913	Atad5	ATPase family, AAA domain containing 5	Mus musculus ATPase family, AAA domain containing 5 (Atad5), mRNA [NM_001029856]	NM_001029856	NM_001029856	237877	chr11	79949184	79949243	+	15145	146	216	A_55_P2126368	FALSE	Mm.89551	ENSMUST00000017694		ref|NM_001029856|ens|ENSMUST00000017694|ens|ENSMUST00000108239|ens|ENSMUST00000151815	chr11:079949184-079949243	mm|11qB5	GO:0000166(nucleotide binding)|GO:0003674(molecular_function)|GO:0005524(ATP binding)|GO:0005575(cellular_component)|GO:0005634(nucleus)|GO:0006974(response to DNA damage stimulus)|GO:0008150(biological_process)	GCATACCTGTTTACAAATGTGTATAAAGATGTGTTTTTACCTCTTGTTCAACCTACCTTC	79915	ATAD5	0
[truncated: 19,863 more rows]

## Sheet: 3_Upregulated
Sheet 3: Differentially expressed probes (upregulated) (FC x1.5, Welch's t-Test q-value < 0.1)
Total	1281
Unique Gene symbol	1096
[truncated: 1,282 more rows]

## Sheet: 4_Downregulated
Sheet 4: Differentially expressed probes (downregulated) (FC x1.5, Welch's t-Test q-value < 0.1)
Total	2805
Unique Gene symbol	2386
[truncated: 2,806 more rows]

## Sheet: 5_Up_GO
Sheet 5: Gene ontolgoy analysis for upregulated genes
[truncated: 1,098 more rows]

[truncated: 1 more sheets: 6_Dn_GO]
