# Supplementary material for: PRC2-Mediated Transcriptomic Alterations at the Embryonic Stage Govern Tumorigenesis and Clinical Outcome in MYCN-Driven Neuroblastoma
Source: Oxford University Press journal article supplement (doi:10.1158/0008-5472.can-16-3144), 2017-08-14
Supplement: 00085472can163144-sup-174843_3_supp_4166655_2t210l.xlsx [file 00085472can163144-sup-174843_3_supp_4166655_2t210l.xlsx]

## Sheet: 1_data processing
Sheet 1: Data processing
Sample information
Sample group name	Biological replicates	Remarks
3w WT SMG tissue	8
3w TH-MYCN SMG tissue	8
3w TH-MYCN primary sphere	8
3w TH-MYCN passage	4	4 samples from primary sphere, array is duplicate
Array: Agilent, SurePrint G3 Mouse GE, 8x60K
Normalization method
-Low Signal Cutoff: 1.0
-Log Transformation: Base 2
-Global Normalization: Percentile 75
-Centering: Mean
Probe selection for further analysis	probe number	Remarks
All probes	55821
1. Remove probes if they are not well anottated	29734
- Remove probes if they do not have Entrez gene ID
- Remove probes if their Refseq numbers are starting from either XM or XR
- Remove probes if their gene names contain “predicted gene”
2. Remove if 50% of gIsWellAboveBGs = 0 at all sample groups	23330	Remove probes which signals are lower than backgroud signal
3. Remove if mean of ProcessedSignals in (-1 to 1) at all sample groups	7411	Remove probes which processed signals are not varying so much among all sample groups
4. Remove if SD of ProcessedSignals > 2 at one of each sample groups	7232	Remove probes which signals are dramatically fluctuating within a sample group
* 7232 probes were considered as differentially expressed probes among 4 groups
* 7232 probes were used to draw hierarchycal tree and line plot

## Sheet: 2_All probes
Sheet 2: All differentially expressed probes among 4 sample groups
NAME	GENE_SYMBOL	GENE_NAME	DESCRIPTION	REFSEQ	GB_ACC	LOCUSLINK_ID	chrom	chromStart	chromEnd	strand	ID	COL	ROW	SPOT_ID	CONTROL_TYPE	UNIGENE_ID	ENSEMBL_ID	TIGR_ID	ACCESSION_STRING	CHROMOSOMAL_LOCATION	CYTOBAND	GO_ID	SEQUENCE	EntrezGene ID_Human	HGNC symbol_Human	Selection
A_51_P121031	March1	membrane-associated ring finger (C3HC4) 1	Mus musculus membrane-associated ring finger (C3HC4) 1 (March1), transcript variant 3, mRNA [NM_175188]	NM_175188	NM_175188	72925	chr8	68994134	68994193	+	7165	171	103	A_51_P121031	FALSE	Mm.380457			ref|NM_175188|ref|NM_001293784|ref|NM_001166372|ref|NM_001166375	chr8:068994134-068994193	mm|8qB3.2	GO:0000209(protein polyubiquitination)|GO:0002376(immune system process)|GO:0002495(antigen processing and presentation of peptide antigen via MHC class II)|GO:0004842(ubiquitin-protein ligase activity)|GO:0005764(lysosome)|GO:0005765(lysosomal membrane)|GO:0005768(endosome)|GO:0005789(endoplasmic reticulum membrane)|GO:0005794(Golgi apparatus)|GO:0005886(plasma membrane)|GO:0006955(immune respon…	AACCAAAGCACGGGCATCACGTTGCACACATCTGGGATCCATATCCATGAACTTTGTAAT	55016	2016-03-01	0
A_51_P363871	March2	membrane-associated ring finger (C3HC4) 2	Mus musculus membrane-associated ring finger (C3HC4) 2 (March2), transcript variant 1, mRNA [NM_145486]	NM_145486	NM_145486	224703	chr17	33823601	33823542	-	15356	146	121	A_51_P363871	FALSE	Mm.374865	ENSMUST00000066121		ref|NM_145486|ens|ENSMUST00000066121|gb|AK039778|tc|TC1587185	chr17:033823601-033823542	mm|17qB1	GO:0004842(ubiquitin-protein ligase activity)|GO:0005764(lysosome)|GO:0005768(endosome)|GO:0005783(endoplasmic reticulum)|GO:0006897(endocytosis)|GO:0008270(zinc ion binding)|GO:0008766(UDP-N-acetylmuramoylalanyl-D-glutamyl-2,6-diaminopimelate-D-alanyl-D-alanine ligase activity)|GO:0016020(membrane)|GO:0016021(integral to membrane)|GO:0016567(protein ubiquitination)|GO:0016874(ligase activity)|GO…	GCTTTGAATTACATGGAGAGTTTTAGTTTGATATTAACCTGTCAAGAATTCTGCATGCAG	51257	2016-03-02	0
A_52_P301261	March4	membrane-associated ring finger (C3HC4) 4	Mus musculus membrane-associated ring finger (C3HC4) 4 (March4), mRNA [NM_001045533]	NM_001045533	NM_001045533	381270	chr1	72473747	72473688	-	30177	100	328	A_52_P301261	FALSE	Mm.337023	ENSMUST00000047786		ref|NM_001045533|ens|ENSMUST00000047786|gb|AK043443|gb|BC056494	chr1:072473747-072473688	mm|1qC3	GO:0004842(ubiquitin-protein ligase activity)|GO:0005794(Golgi apparatus)|GO:0005795(Golgi stack)|GO:0005802(trans-Golgi network)|GO:0008270(zinc ion binding)|GO:0008766(UDP-N-acetylmuramoylalanyl-D-glutamyl-2,6-diaminopimelate-D-alanyl-D-alanine ligase activity)|GO:0016020(membrane)|GO:0016021(integral to membrane)|GO:0016567(protein ubiquitination)|GO:0016874(ligase activity)|GO:0018169(ribosom…	AAACTCTCTGTTGTTTGTAATATTCTCTTAAAAGCTTGGAAATAAAATTTCTTTCCCTAG	57574	2016-03-04	0
A_52_P647856	March4	membrane-associated ring finger (C3HC4) 4	Mus musculus membrane-associated ring finger (C3HC4) 4 (March4), mRNA [NM_001045533]	NM_001045533	NM_001045533	381270	chr1	72475485	72475426	-	57972	16	169	A_52_P647856	FALSE	Mm.337023	ENSMUST00000047786		ref|NM_001045533|ens|ENSMUST00000047786|gb|AK122502|gb|BC056494	chr1:072475485-072475426	mm|1qC3	GO:0004842(ubiquitin-protein ligase activity)|GO:0005794(Golgi apparatus)|GO:0005795(Golgi stack)|GO:0005802(trans-Golgi network)|GO:0008270(zinc ion binding)|GO:0008766(UDP-N-acetylmuramoylalanyl-D-glutamyl-2,6-diaminopimelate-D-alanyl-D-alanine ligase activity)|GO:0016020(membrane)|GO:0016021(integral to membrane)|GO:0016567(protein ubiquitination)|GO:0016874(ligase activity)|GO:0018169(ribosom…	GACTTAGAGGATCAAAAATCAGGAGGCAGGACAAACCTACAGACTTCCTCATCTGCCCAA	57574	2016-03-04	0
A_55_P2358002	March5	membrane-associated ring finger (C3HC4) 5	Mus musculus membrane-associated ring finger (C3HC4) 5 (March5), transcript variant 1, mRNA [NM_027314]	NM_027314	NM_027314	69104	chr19	37298752	37298811	+	30759	99	147	A_55_P2358002	FALSE	Mm.175989			ref|NM_027314|gb|AK017741|tc|TC1639247|riken|5730499H23	chr19:037298752-037298811	mm|19qC2	GO:0000209(protein polyubiquitination)|GO:0004842(ubiquitin-protein ligase activity)|GO:0005739(mitochondrion)|GO:0005741(mitochondrial outer membrane)|GO:0005783(endoplasmic reticulum)|GO:0005789(endoplasmic reticulum membrane)|GO:0008270(zinc ion binding)|GO:0008766(UDP-N-acetylmuramoylalanyl-D-glutamyl-2,6-diaminopimelate-D-alanyl-D-alanine ligase activity)|GO:0016020(membrane)|GO:0016021(inte…	GTAGAAGTTAACTCCATCTAAGTTGGCTGAAAATGTTCATTACTTACCAAATGGTTGAAG	54708	2016-03-05	0
A_55_P2163812	Sept4	septin 4	Mus musculus septin 4 (Sept4), transcript variant 3, mRNA [NM_001284394]	NM_001284394	NM_001284394	18952	chr11	87402710	87402769	+	15278	146	277	A_55_P2163812	FALSE	Mm.2214			ref|NM_001284394|ref|NM_001284398|ref|NM_011129|ref|NM_001284392	chr11:087402710-087402769	mm|11qC	GO:0000166(nucleotide binding)|GO:0005525(GTP binding)|GO:0005737(cytoplasm)|GO:0005739(mitochondrion)|GO:0005856(cytoskeleton)|GO:0007049(cell cycle)|GO:0007286(spermatid development)|GO:0007420(brain development)|GO:0030382(sperm mitochondrion organization)|GO:0031398(positive regulation of protein ubiquitination)|GO:0031514(motile cilium)|GO:0036126(sperm flagellum)|GO:0042995(cell projection)…	ATCTATCAGTTCCCAGACTGTGATTCCGATGAGGACGAGGACTTCAAATTACAGGACCAA	5414	2016-09-04	0
A_51_P383991	Sept4	septin 4	Mus musculus septin 4 (Sept4), transcript variant 1, mRNA [NM_011129]	NM_011129	NM_011129	18952	chr11	87403834	87403893	+	29409	103	223	A_51_P383991	FALSE	Mm.2214			ref|NM_011129|ref|NM_001284394|ref|NM_001284392|ref|NM_001284398	chr11:087403834-087403893	mm|11qC	GO:0000166(nucleotide binding)|GO:0005525(GTP binding)|GO:0005737(cytoplasm)|GO:0005739(mitochondrion)|GO:0005856(cytoskeleton)|GO:0007049(cell cycle)|GO:0007286(spermatid development)|GO:0007420(brain development)|GO:0030382(sperm mitochondrion organization)|GO:0031398(positive regulation of protein ubiquitination)|GO:0031514(motile cilium)|GO:0036126(sperm flagellum)|GO:0042995(cell projection)…	AGATGTTACACAAAATCCAAAGACAGATGAAGGAGACTCACTAACTGGCTTTTGGACCTG	5414	2016-09-04	0
A_55_P1981670	Sept8	septin 8	Mus musculus septin 8 (Sept8), transcript variant 2, mRNA [NM_001252332]	NM_001252332	NM_001252332	20362	chr11	53351228	53351287	+	24961	116	264	A_55_P1981670	FALSE	Mm.274399	ENSMUST00000108987		ref|NM_001252332|ref|NM_001252333|ref|NM_033144|ens|ENSMUST00000108987	chr11:053351228-053351287	mm|11qB1.3	GO:0000166(nucleotide binding)|GO:0003674(molecular_function)|GO:0005525(GTP binding)|GO:0005737(cytoplasm)|GO:0005856(cytoskeleton)|GO:0008150(biological_process)|GO:0043209(myelin sheath)	TCCATGAGAAGTTTGAGCACCTGAAGCGAATCCACCAGGAGGAGAAGCGCAAGGTAGAGG	23176	2016-09-08	0
A_55_P1988882	Sept9	septin 9	Mus musculus septin 9 (Sept9), transcript variant 2, mRNA [NM_001113487]	NM_001113487	NM_001113487	53860	chr11	117223411	117223470	+	29753	102	191	A_55_P1988882	FALSE	Mm.38450			ref|NM_001113487|ref|NM_001113486|ref|NM_001113488|ref|NM_017380	chr11:117223411-117223470	mm|11qE2	GO:0000166(nucleotide binding)|GO:0001725(stress fiber)|GO:0005525(GTP binding)|GO:0005737(cytoplasm)|GO:0005856(cytoskeleton)|GO:0005874(microtubule)|GO:0007049(cell cycle)|GO:0015629(actin cytoskeleton)|GO:0048471(perinuclear region of cytoplasm)|GO:0051291(protein heterooligomerization)|GO:0051301(cell division)	ATTTAGCAGCAACCCGGTCATCAGGATGACTTTGTGCCTCTGTAACCAGGTATTGAAACT	10801	2016-09-09	0
A_66_P118513	Sept11	septin 11	Mus musculus septin 11 (Sept11), mRNA [NM_001009818]	NM_001009818	NM_001009818	52398	chr5	93603881	93603940	+	48221	45	320	A_66_P118513	FALSE	Mm.428571	ENSMUST00000074733		ref|NM_001009818|ens|ENSMUST00000074733|ref|XM_011249532|ref|XM_011249530	chr5:093603881-093603940	mm|5qE2	GO:0000166(nucleotide binding)|GO:0001725(stress fiber)|GO:0003674(molecular_function)|GO:0005525(GTP binding)|GO:0005737(cytoplasm)|GO:0005856(cytoskeleton)|GO:0007049(cell cycle)|GO:0030054(cell junction)|GO:0042995(cell projection)|GO:0045202(synapse)|GO:0051291(protein heterooligomerization)|GO:0051301(cell division)|GO:0070062(extracellular vesicular exosome)	CGAGTAACTTGGTGTCTGTTATCGTAGTGTGGTGCCAGGTGACCTATGCATATATCACTA	55752	2016-09-11	0
A_55_P2235911	0610009E02Rik	RIKEN cDNA 0610009E02 gene	Mus musculus adult male kidney cDNA, RIKEN full-length enriched library, clone:0610009E02 product:unclassifiable, full insert sequence. [AK075572]		AK075572	100125929	chr2	26314780	26314839	+	46205	52	87	A_55_P2235911	FALSE	Mm.392411			gb|AK075572|gb|XR_140496|riken|0610009E02|nap|NAP119524-1	chr2:26314780-26314839	mm|2qA3	GO:0003674(molecular_function)|GO:0005575(cellular_component)|GO:0008150(biological_process)	CTCTGAGAACTAGTTTATTTTCTTGGAACAGATATGTTTTTCCCTAGTGCCATAGAAAAC			0
A_55_P2335933	0610033M10Rik	RIKEN cDNA 0610033M10 gene	Mus musculus adult male kidney cDNA, RIKEN full-length enriched library, clone:0610033M10 product:unclassifiable, full insert sequence. [AK002748]		AK002748	74093	chr6	51351023	51350964	-	55262	24	14	A_55_P2335933	FALSE	Mm.410871			gb|AK002748|tc|TC1599659|riken|0610033M10|nap|NAP090103-1	chr6:051351023-051350965	mm|6qB3		ACTTGGGTCTTCATCAAGCATCAAGGACAGTATTTTTTAATAAAAGTGGCATCACTTCCC			0
A_55_P2302195	0610040F04Rik	RIKEN cDNA 0610040F04 gene	Mus musculus RIKEN cDNA 0610040F04 gene (0610040F04Rik), transcript variant 1, long non-coding RNA [NR_104577]	NR_104577	NR_104577	75394	chr6	108527104	108527045	-	58452	14	194	A_55_P2302195	FALSE	Mm.395061			ref|NR_104577|gb|AK039720|tc|TC1629519|riken|A330095A16	chr6:108527104-108527045	mm|6qE2	GO:0003674(molecular_function)|GO:0005575(cellular_component)|GO:0008150(biological_process)	CGAAAGATGTGTCTGTACTGAACTCGTGGATATGTATTGTCATTCTTCCTCAAATAATAA			0
A_51_P483617	0610040J01Rik	RIKEN cDNA 0610040J01 gene	Mus musculus RIKEN cDNA 0610040J01 gene (0610040J01Rik), mRNA [NM_029554]	NM_029554	NM_029554	76261	chr5	64290780	64290839	+	6386	173	22	A_51_P483617	FALSE	Mm.38143	ENSMUST00000081747		ref|NM_029554|ens|ENSMUST00000081747|ref|XM_011240792|ref|XM_006504178	chr5:064290780-064290839	mm|5qC3.1	GO:0003674(molecular_function)|GO:0005575(cellular_component)|GO:0008150(biological_process)	AGGTTCGAGTTCGTGAGTGTTTTGTAACAGCCTAGCCATTTATGAAGGGCTCTGTGTCAT	55286	C4orf19	0
A_55_P2042973	1010001N08Rik	RIKEN cDNA 1010001N08 gene	Mus musculus 15 days embryo male testis cDNA, RIKEN full-length enriched library, clone:8030446N09 product:unclassifiable, full insert sequence. [AK033147]		AK033147	68434	chr18	11049144	11049085	-	20065	131	216	A_55_P2042973	FALSE	Mm.57626			gb|AK033147|gb|XR_168572|tc|TC1615596|riken|8030446N09	chr18:11049144-11049085	mm|18qA1	GO:0003674(molecular_function)|GO:0005575(cellular_component)|GO:0008150(biological_process)	TATAACTCACTGGTGAATTGCTTAATGTTCAAGGATGTGGGTTCGATTCTCACGCACTAC			0
A_51_P252677	1110007C09Rik	RIKEN cDNA 1110007C09 gene	Mus musculus RIKEN cDNA 1110007C09 gene (1110007C09Rik), mRNA [NM_026738]	NM_026738	NM_026738	68480	chr13	49298510	49298451	-	25873	114	79	A_51_P252677	FALSE	Mm.3336	ENSMUST00000048946		ref|NM_026738|ens|ENSMUST00000048946|ref|XM_006516955|gb|BC147073	chr13:049298510-049298451	mm|13qA5	GO:0003674(molecular_function)|GO:0005739(mitochondrion)|GO:0005783(endoplasmic reticulum)|GO:0008150(biological_process)|GO:0016020(membrane)|GO:0016021(integral to membrane)|GO:0042981(regulation of apoptotic process)	AGATGACCTCGGAGGACTCTGATGAACCCAGATCCCGGGCCTTACCTGCTGCTTAACCAA	84270	CARD19	0
A_51_P207153	1110008P14Rik	RIKEN cDNA 1110008P14 gene	Mus musculus RIKEN cDNA 1110008P14 gene (1110008P14Rik), mRNA [NM_198001]	NM_198001	NM_198001	73737	chr2	32234822	32234763	-	51391	36	211	A_51_P207153	FALSE	Mm.27608	ENSMUST00000048792		ref|NM_198001|ens|ENSMUST00000048792|gb|AK079725|gb|AK003598	chr2:032234822-032234763	mm|2qB	GO:0003674(molecular_function)|GO:0005575(cellular_component)|GO:0008150(biological_process)	GGTAGATACTACTTGGCTTAGACACCATCTCGGGTACTGGCCTCCAGATCCTAGTGGGTC	79095	C9orf16	0
A_55_P2391394	1110018N20Rik	RIKEN cDNA 1110018N20 gene	Mus musculus Kv2.1-Ptgis antisense RNA, complete sequence. [AY672066]		AY672066	68941	chr2	167018192	167018251	+	37459	78	196	A_55_P2391394	FALSE	Mm.188175			gb|AY672066|gb|AK044157|tc|TC1600804|riken|A830095L23	chr2:167018192-167018251	mm|2qH3	GO:0003674(molecular_function)|GO:0005575(cellular_component)|GO:0008150(biological_process)	AGCATACTCCCTACCTCATAGGCAGCAGCTGTTATCTACTGAGTGGATAGTATGTTCTTG			0
A_52_P185054	1110035H17Rik	RIKEN cDNA 1110035H17 gene	Mus musculus 18-day embryo whole body cDNA, RIKEN full-length enriched library, clone:1110035H17 product:hypothetical protein, full insert sequence. [AK004111]		AK004111	68686	chr7	29941849	29941908	+	9008	165	26	A_52_P185054	FALSE	Mm.260890			gb|AK004111|gb|AA204303|tc|TC1665066|riken|1110035H17	chr7:29941849-29941908	mm|7qB1		ATTTGCCAGCTAATGTTTCTGCCAAACTGGTTTTTTCCATCTATGCGATTGGGATCCAAG			0
A_52_P31814	1110038B12Rik	RIKEN cDNA 1110038B12 gene	Mus musculus RIKEN cDNA 1110038B12 gene (1110038B12Rik), transcript variant 1, long non-coding RNA [NR_027943]	NR_027943	NR_027943	68763	chr17	35087303	35087244	-	21269	128	103	A_52_P31814	FALSE	Mm.28895			ref|NR_027943|ref|NR_015536|gb|AK002372|gb|AK004150	chr17:35087303-35087244	mm|17qB1	GO:0003674(molecular_function)|GO:0005575(cellular_component)|GO:0008150(biological_process)	GCCTCCCTTGAACATGAGTATTAGACAAATGAAATAAGAACTTATCTTGCCCAGACTATA			0
A_55_P2197638	1110046J04Rik	RIKEN cDNA 1110046J04 gene	Mus musculus RIKEN cDNA 1110046J04 gene (1110046J04Rik), long non-coding RNA [NR_040707]	NR_040707	NR_040707	68808	chr13	34051986	34052045	+	35779	83	276	A_55_P2197638	FALSE	Mm.443347			ref|NR_040707|gb|AK004186|tc|TC1602179|riken|1110046J04	chr13:34051986-34052045	mm|13qA3.3	GO:0003674(molecular_function)|GO:0005575(cellular_component)|GO:0008150(biological_process)	TGCTTCATGACTGTGGACACAATGTGGACTAGCTACTTCATAGCCCTCATTAAACGGTGA			0
A_52_P552547	1110054M08Rik	RIKEN cDNA 1110054M08 gene	Mus musculus RIKEN cDNA 1110054M08 gene (1110054M08Rik), long non-coding RNA [NR_037954]	NR_037954	NR_037954	68841	chr16	24392940	24392881	-	39441	72	168	A_52_P552547	FALSE	Mm.361995			ref|NR_037954|gb|AK039760|gb|AK004252|gb|BC037367	chr16:24392940-24392881	mm|16qB1	GO:0003674(molecular_function)|GO:0005575(cellular_component)|GO:0008150(biological_process)	TAACTGTGAGCTTAGACCCAAGTTAGAGCTAGGCAGATGACTTGACCCACTGAAGTGACT			0
A_52_P354373	1190002F15Rik	RIKEN cDNA 1190002F15 gene	Mus musculus RIKEN cDNA 1190002F15 gene (1190002F15Rik), transcript variant 1, long non-coding RNA [NR_037956]	NR_037956	NR_037956	381822	chr6	134901431	134901490	+	22218	125	173	A_52_P354373	FALSE	Mm.5935			ref|NR_037956|ref|NR_037955|gb|AK138072|gb|AK012387	chr6:134901431-134901490	mm|6qG1		CGGAAGCAACCTGAGGCGTCCTCTTTGTCTGTAAAGATAGAGAGTCCATTGTGGAAGGGG			0
A_52_P598634	1190007I07Rik	RIKEN cDNA 1190007I07 gene	Mus musculus RIKEN cDNA 1190007I07 gene (1190007I07Rik), transcript variant 1, mRNA [NM_001135567]	NM_001135567	NM_001135567	544717	chr10	82082933	82082874	-	27827	108	107	A_52_P598634	FALSE	Mm.334867	ENSMUST00000183363		ref|NM_001135567|ref|NM_001135568|ref|NM_001135569|ens|ENSMUST00000183363	chr10:086151308-086151367	mm|10qC1	GO:0003674(molecular_function)|GO:0005575(cellular_component)|GO:0005576(extracellular region)|GO:0008150(biological_process)	AGAACTCTAAATGGAGCTTTTGGGACTGAAAGAGAGACGCCACGAACCTCATGTTTCACA	728568	C12orf73	0
A_55_P2064921	1500002C15Rik	RIKEN cDNA 1500002C15 gene	Mus musculus adult male cerebellum cDNA, RIKEN full-length enriched library, clone:1500002C15 product:hypothetical protein, full insert sequence. [AK005108]		AK005108	68946	chr4	155108042	155107983	-	13372	152	153	A_55_P2064921	FALSE	Mm.379515			gb|AK005108|gb|AK080143|tc|TC1589610|tc|TC1608959	chr4:155108042-155107983	mm|4qE2	GO:0003674(molecular_function)|GO:0005575(cellular_component)|GO:0008150(biological_process)	ATTCAGGACAAACCAAAGACTTCTAGCAGCACCTATTTTGTGGCAATTCCAAGGTTTTTT			0
A_55_P2041653	1500009C09Rik	RIKEN cDNA 1500009C09 gene	Mus musculus RIKEN cDNA 1500009C09 gene (1500009C09Rik), transcript variant 2, long non-coding RNA [NR_037697]	NR_037697	NR_037697	76505	chr15	82091116	82091175	+	20077	131	192	A_55_P2041653	FALSE	Mm.23023			ref|NR_037697|ref|NR_037698|gb|AK005178|gb|BC094356	chr15:82091116-82091175	mm|15qE1	GO:0003674(molecular_function)|GO:0005575(cellular_component)|GO:0008150(biological_process)	GTCTGTCCTGCTGCGGCTTCACTTGTGCAACGCTAATAAAGGTTCTATGGCCACCTTTGC			0
A_55_P1999389	1500009C09Rik	RIKEN cDNA 1500009C09 gene	Mus musculus RIKEN cDNA 1500009C09 gene (1500009C09Rik), transcript variant 2, long non-coding RNA [NR_037697]	NR_037697	NR_037697	76505	chr15	82091121	82091180	+	6978	171	150	A_55_P1999389	FALSE	Mm.23023			ref|NR_037697|ref|NR_037698|gb|BC023061|tc|TC1598764	chr15:82091121-82091180	mm|15qE1	GO:0003674(molecular_function)|GO:0005575(cellular_component)|GO:0008150(biological_process)	TCCTGCTGCGGCTTCACTTGTGCAACGCTAATAAAGGTTCTATGGCCACCTTTGCAGACC			0
A_55_P2019577	1500011B03Rik	RIKEN cDNA 1500011B03 gene	Mus musculus RIKEN cDNA 1500011B03 gene (1500011B03Rik), transcript variant 2, long non-coding RNA [NR_027818]	NR_027818	NR_027818	66236	chr5	115263185	115263126	-	40896	68	209	A_55_P2019577	FALSE	Mm.268546			ref|NR_027818|gb|AK161363|gb|AK165632|gb|BC061238	chr5:115263185-115263126	mm|5qF	GO:0003674(molecular_function)|GO:0005575(cellular_component)|GO:0008150(biological_process)	TCGCAGGAGCTGGACAGGTTGCACACGGAGCTGCAGATACAGATCCTGAACCTTAATTGA			0
A_55_P2057741	1500015L24Rik	RIKEN cDNA 1500015L24 gene	Mus musculus RIKEN cDNA 1500015L24 gene (1500015L24Rik), long non-coding RNA [NR_045817]	NR_045817	NR_045817	68994	chr19	20497200	20497259	+	62007	3	300	A_55_P2057741	FALSE	Mm.261028			ref|NR_045817|gb|AK005254|tc|TC1728782|tc|TC1594204	chr19:20497200-20497259	mm|19qB		CTTGATCAACAGGTATGTTCATAGTAAACCCGAGTAACCATTTTTGTACAGTGAATAAAG			0
A_51_P404463	1500015O10Rik	RIKEN cDNA 1500015O10 gene	Mus musculus RIKEN cDNA 1500015O10 gene (1500015O10Rik), mRNA [NM_024283]	NM_024283	NM_024283	78896	chr1	43799321	43799380	+	38207	76	12	A_51_P404463	FALSE	Mm.50109	ENSMUST00000027217		ref|NM_024283|ens|ENSMUST00000027217|gb|AK049805|gb|AK018770	chr1:043799321-043799380	mm|1qC1.1	GO:0003674(molecular_function)|GO:0005576(extracellular region)|GO:0005615(extracellular space)|GO:0008054(cyclin catabolic process)|GO:0031410(cytoplasmic vesicle)|GO:0070314(G1 to G0 transition)|GO:0090398(cellular senescence)	CAGGCTAAAGGAAAGAATATAAGTGCTTTTTGCATTTCATGCATGTGCTTAACGATATGT	84417	C2orf40	0
A_52_P574945	1500026H17Rik	RIKEN cDNA 1500026H17 gene	Mus musculus RIKEN cDNA 1500026H17 gene (1500026H17Rik), long non-coding RNA [NR_130956]	NR_130956	NR_130956	69002	chr10	89151917	89151976	+	45039	55	124	A_52_P574945	FALSE	Mm.293947			ref|NR_130956|ref|XR_871939|ref|XR_886593|ref|XR_871941	chr10:89151917-89151976	mm|10qC2	GO:0003674(molecular_function)|GO:0005575(cellular_component)|GO:0008150(biological_process)	CAAACAGTCACATCTCCTTAAATGGATCCACTTTCCGATCTTTGAAAATACTTTAGAGCC			0
A_51_P147064	1600014C23Rik	RIKEN cDNA 1600014C23 gene	Mus musculus RIKEN cDNA 1600014C23 gene (1600014C23Rik), mRNA [NM_028164]	NM_028164	NM_028164	72240	chr17	45869894	45869835	-	49819	41	75	A_51_P147064	FALSE	Mm.482897	ENSMUST00000178179		ref|NM_028164|ens|ENSMUST00000178179|gb|AK005450|gb|BY705655	chr17:045869894-045869835	mm|17qB3	GO:0003674(molecular_function)|GO:0005575(cellular_component)|GO:0008150(biological_process)	AGGGCTTCCAGCGTGTTCCATGTGAGGAGCTGGGGTATCCAACTGTTTAATGTTTAAAAT			0
A_55_P2370384	1600029I14Rik	RIKEN cDNA 1600029I14 gene	Mus musculus RIKEN cDNA 1600029I14 gene (1600029I14Rik), long non-coding RNA [NR_028123]	NR_028123	NR_028123	69797	chr9	99375111	99375170	+	15052	147	73	A_55_P2370384	FALSE	Mm.307159	ENSMUST00000056103		ref|NR_028123|ens|ENSMUST00000056103|gb|AK005560|tc|TC1590362	chr9:99375111-99375170	mm|9qE3.3	GO:0003674(molecular_function)|GO:0004550(nucleoside diphosphate kinase activity)|GO:0005575(cellular_component)|GO:0005622(intracellular)|GO:0006165(nucleoside diphosphate phosphorylation)	TAACCTCAGAAGACATTGGGTCTCTTCAACAATAAAGCTTTGATCCTAGTGTGGTACCTT			0
A_55_P2289829	1700001D01Rik	RIKEN cDNA 1700001D01 gene	Mus musculus adult male kidney cDNA, RIKEN full-length enriched library, clone:F530003L12 product:hypothetical protein, full insert sequence. [AK143941]		AK143941	69279	chr8	63768612	63768671	+	37521	78	72	A_55_P2289829	FALSE	Mm.417857			gb|AK143941|riken|F530003L12	chr8:63768612-63768671	mm|8qB3.1		CACACACCATAAAATTGTTTTGTTACTGCTTCATAACTGTAACTTTCCTACCGTTATGGA			0
A_55_P2404484	1700001L05Rik	RIKEN cDNA 1700001L05 gene	Mus musculus RIKEN cDNA 1700001L05 gene (1700001L05Rik), long non-coding RNA [NR_027980]	NR_027980	NR_027980	69291	chr15	83184390	83184331	-	52770	32	77	A_55_P2404484	FALSE	Mm.66794			ref|NR_027980|tc|TC1693396	chr15:83184390-83184331	mm|15qE1	GO:0003674(molecular_function)|GO:0005575(cellular_component)|GO:0008150(biological_process)	TTCTTTGCCAAGTGTTTCTTTCTGTGGTGTTCAGTTTTGCCTCAGGCCTACAGCCATAAG			0
A_51_P515684	1700001L05Rik	RIKEN cDNA 1700001L05 gene	Mus musculus RIKEN cDNA 1700001L05 gene (1700001L05Rik), long non-coding RNA [NR_027980]	NR_027980	NR_027980	69291	chr15	83188178	83188119	-	14569	148	56	A_51_P515684	FALSE	Mm.66794			ref|NR_027980|gb|AK132681|gb|AK005608|gb|BC099567	chr15:83188178-83188119	mm|15qE1	GO:0003674(molecular_function)|GO:0005575(cellular_component)|GO:0008150(biological_process)	CCCAGCATCCTGAAGCATATGAGGCACCTTAGAGAAAAGGTCTAAATGGGCCTTATAAGA			0
A_51_P236991	1700001P01Rik	RIKEN cDNA 1700001P01 gene	Mus musculus RIKEN cDNA 1700001P01 gene (1700001P01Rik), mRNA [NM_028156]	NM_028156	NM_028156	72215	chr11	97632907	97632848	-	61154	6	38	A_51_P236991	FALSE	Mm.269049	ENSMUST00000107576		ref|NM_028156|ens|ENSMUST00000107576|gb|AK005619|gb|BC048607	chr11:097632907-097632848	mm|11qD	GO:0003674(molecular_function)|GO:0005575(cellular_component)|GO:0008150(biological_process)	CATTTCCCATTTTCTGAAGACATTGCGTCACAAGGCTTGACCTGCGTCTTCAAGACAGAT	388381	C17orf98	0
A_51_P436594	1700003E16Rik	RIKEN cDNA 1700003E16 gene	Mus musculus RIKEN cDNA 1700003E16 gene (1700003E16Rik), mRNA [NM_027948]	NM_027948	NM_027948	71837	chr6	83112626	83112685	+	27439	109	227	A_51_P436594	FALSE	Mm.17621	ENSMUST00000032106		ref|NM_027948|ens|ENSMUST00000032106|gb|AK005628|gb|BC126949	chr6:083112626-083112685	mm|6qC3	GO:0003674(molecular_function)|GO:0005575(cellular_component)|GO:0008150(biological_process)	AAGTGCTTTGGAAGCCCATGGTTATTTCAGAAACCATGAAGCTGGTTCCTGGTGTGAGTA	388963	C2orf81	0
A_55_P2057979	1700003M02Rik	RIKEN cDNA 1700003M02 gene	Mus musculus RIKEN cDNA 1700003M02 gene (1700003M02Rik), mRNA [NM_027041]	NM_027041	NM_027041	69329	chr4	34658641	34658582	-	1834	187	269	A_55_P2057979	FALSE	Mm.483793			ref|NM_027041|gb|BC058220|tc|TC1593003	chr4:034658641-034658582	mm|4qA5	GO:0003674(molecular_function)|GO:0005575(cellular_component)|GO:0008150(biological_process)	GCATTCTCTTGAAAACACCTGGGTTTGTAACTCCTGACTTGATTAAAGTGGCGTCTCGGT			0
A_55_P1982559	1700007K13Rik	RIKEN cDNA 1700007K13 gene	Mus musculus RIKEN cDNA 1700007K13 gene (1700007K13Rik), mRNA [NM_027040]	NM_027040	NM_027040	69327	chr2	28317582	28317523	-	62072	3	170	A_55_P1982559	FALSE	Mm.46470	ENSMUST00000086370		ref|NM_027040|ens|ENSMUST00000086370|ens|ENSMUST00000126242|gb|BC099566	chr2:028317582-028317523	mm|2qA3	GO:0003674(molecular_function)|GO:0005575(cellular_component)|GO:0008150(biological_process)	ATTTCACACAGGAAAGATGCTGACAGCATCTTTGTTTTATTAAAAAGTTGCCACAGCCTC	138162	C9orf116	0
A_55_P2182001	1700008O03Rik	RIKEN cDNA 1700008O03 gene	Mus musculus RIKEN cDNA 1700008O03 gene (1700008O03Rik), mRNA [NM_027049]	NM_027049	NM_027049	69349	chr7	51615472	51615413	-	47452	48	217	A_55_P2182001	FALSE	Mm.358922			ref|NM_027049|ref|XM_006541172|ref|XM_011250899|ref|XM_011250900	chr7:051615472-051615413	mm|7qB4	GO:0003674(molecular_function)|GO:0005575(cellular_component)|GO:0008150(biological_process)	GGGCCGGCTCGAGGGGGTGGATACTGTGAGTTTAATTATAAAGAATGACCTGATACAAAA	342918	C19orf81	0
A_51_P245038	1700011A15Rik	RIKEN cDNA 1700011A15 gene	Mus musculus RIKEN cDNA 1700011A15 gene (1700011A15Rik), mRNA [NM_025487]	NM_025487	NM_025487	66322	chr15	101284070	101284129	+	26972	110	178	A_51_P245038	FALSE	Mm.158111	ENSMUST00000023781		ref|NM_025487|ens|ENSMUST00000023781|ref|XM_006521258|gb|AK007046	chr15:101284070-101284129	mm|15qF2	GO:0003674(molecular_function)|GO:0005575(cellular_component)|GO:0008150(biological_process)	TCCGGAGAAGACTAGAAACTGGCGCTTCTGCCCAAAGACTTGGTCCTCTTGTCTCAGATT			0
A_51_P377812	1700011E24Rik	RIKEN cDNA 1700011E24 gene	Mus musculus RIKEN cDNA 1700011E24 gene (1700011E24Rik), mRNA [NM_029298]	NM_029298	NM_029298	75467	chr17	87794572	87794513	-	50357	39	311	A_51_P377812	FALSE	Mm.50108	ENSMUST00000040609		ref|NM_029298|ens|ENSMUST00000040609|ref|XM_006525071|ref|XM_006525072	chr17:087794572-087794513	mm|17qE4	GO:0003674(molecular_function)|GO:0005575(cellular_component)|GO:0008150(biological_process)	AAGGCATCCCCAAAAGGCTCTATTACTTCTTGTTTTCGATCTAAGGTTCCCCGATTCTTA	285051	C2orf61	0
A_51_P307901	1700011L22Rik	RIKEN cDNA 1700011L22 gene	Mus musculus RIKEN cDNA 1700011L22 gene (1700011L22Rik), mRNA [NM_026315]	NM_026315	NM_026315	67687	chr8	81744156	81738819	-	28900	104	258	A_51_P307901	FALSE	Mm.178707	ENSMUST00000034109		ref|NM_026315|ens|ENSMUST00000034109|ref|XM_006531314|gb|AK005876	unmapped		GO:0003674(molecular_function)|GO:0005575(cellular_component)|GO:0008150(biological_process)	TCAAGCACAAAGTGGCACATCAGATTTGGGGTTCTGAAGTCCCTTGTCCAACATTTCTAG	646603	C4orf51	0
A_51_P498591	1700012A03Rik	RIKEN cDNA 1700012A03 gene	Mus musculus RIKEN cDNA 1700012A03 gene (1700012A03Rik), mRNA [NM_029587]	NM_029587	NM_029587	76382	chr6	32008760	32008819	+	33895	89	108	A_51_P498591	FALSE	Mm.23510	ENSMUST00000135066		ref|NM_029587|ens|ENSMUST00000135066|gb|AK005884|gb|BC087908	chr6:032008760-032008819	mm|6qA3.3	GO:0003674(molecular_function)|GO:0005575(cellular_component)|GO:0008150(biological_process)	CCTTCTCACCTGACCCTTGAACATTCTACTCTCCCAGTGAGAGAGAGGTGCCGGAGGGAT			0
A_55_P2022504	1700019B21Rik	RIKEN cDNA 1700019B21 gene	Mus musculus RIKEN cDNA 1700019B21 gene (1700019B21Rik), transcript variant 1, long non-coding RNA [NR_045442]	NR_045442	NR_045442	75545	chrX	59763819	59763760	-	30276	100	130	A_55_P2022504	FALSE	Mm.391270			ref|NR_045442|ref|NR_045443|gb|AK006108|riken|1700019B21	chrX:59763819-59763760	mm|XqA6		GGGAAAAAGGATTCAGTGAAATGTACCTTTATTTGCCAAGCTCATGCAAGAAAACAAAAA			0
A_51_P246104	1700019M22Rik	NFX-like protein	Mus musculus RIKEN cDNA 1700019M22 gene (1700019M22Rik), non-coding RNA [NR_103800]	NR_103800	NR_103800	69423	chr12	97285001	97284942	-	44808	56	257	A_51_P246104	FALSE	Mm.46121			ref|NR_103800|gb|DQ309695|gb|AK006132|gb|BC050791	chr12:97285001-97284942	mm|12qE		CTCCAGGAGTTCAACAATGGATTAAGAATGCCAGTAGACTCAGCATGCTAACCAAAGACC			0
A_55_P2133835	1700023F06Rik	RIKEN cDNA 1700023F06 gene	Mus musculus RIKEN cDNA 1700023F06 gene (1700023F06Rik), mRNA [NM_001254724]	NM_001254724	NM_001254724	69441	chr11	103060322	103060263	-	48265	45	232	A_55_P2133835	FALSE	Mm.380648	ENSMUST00000021323		ref|NM_001254724|ens|ENSMUST00000021323|ens|ENSMUST00000107026|ref|XM_011249227	chr11:103060322-103060263	mm|11qE1	GO:0003674(molecular_function)|GO:0005575(cellular_component)|GO:0008150(biological_process)	TCGCCAGCCTGTTTCCAGAGATGTGCTATGAAGAGCTTGTACAAGTAAACAGTTTGCTGA			0
A_55_P2116689	1700024P16Rik	RIKEN cDNA 1700024P16 gene	Mus musculus RIKEN cDNA 1700024P16 gene (1700024P16Rik), transcript variant 1, mRNA [NM_001285952]	NM_001285952	NM_001285952	242594	chr4	104689395	104689454	+	26250	112	310	A_55_P2116689	FALSE	Mm.65181			ref|NM_001285952|ref|NM_001162980|ref|NM_001285953|ref|NR_104376	chr4:104689395-104689454	mm|4qC6	GO:0003674(molecular_function)|GO:0005575(cellular_component)|GO:0008150(biological_process)	CAGAGTTGTAAATAAGATTCTGGTTCTACCCCATATGCACTGTATGTTAATAAAGTCTAC	199920	C1orf168	0
A_55_P1979997	1700026L06Rik	RIKEN cDNA 1700026L06 gene	Mus musculus RIKEN cDNA 1700026L06 gene (1700026L06Rik), mRNA [NM_027283]	NM_027283	NM_027283	69987	chr2	28548500	28548441	-	48080	46	273	A_55_P1979997	FALSE	Mm.239376	ENSMUST00000124840		ref|NM_027283|ens|ENSMUST00000124840|ens|ENSMUST00000102877|gb|AK155408	chr2:028548500-028548441	mm|2qA3	GO:0001669(acrosomal vesicle)|GO:0005737(cytoplasm)|GO:0005881(cytoplasmic microtubule)|GO:0008150(biological_process)|GO:0031410(cytoplasmic vesicle)|GO:0048306(calcium-dependent protein binding)	ATAGTCCTGGACTTTATGAAAGAGTGGATTGCTCATTCTGAGAAGCTGCCTCGCAAAGTG	11092	SPACA9	0
A_55_P1979998	1700026L06Rik	RIKEN cDNA 1700026L06 gene	Mus musculus RIKEN cDNA 1700026L06 gene (1700026L06Rik), mRNA [NM_027283]	NM_027283	NM_027283	69987	chr2	28547660	28547601	-	23273	122	31	A_55_P1979998	FALSE	Mm.239376	ENSMUST00000102877		ref|NM_027283|ens|ENSMUST00000102877|ens|ENSMUST00000124840|gb|AK155297	chr2:028547660-028547601	mm|2qA3	GO:0001669(acrosomal vesicle)|GO:0005737(cytoplasm)|GO:0005881(cytoplasmic microtubule)|GO:0008150(biological_process)|GO:0031410(cytoplasmic vesicle)|GO:0048306(calcium-dependent protein binding)	CTTCTGTACTGTTGCTTCCTCAGGGGGAGACATTCAAGAATAAAGTGTTCTACCACTTCT	11092	SPACA9	0
A_55_P2076524	1700028I16Rik	RIKEN cDNA 1700028I16 gene	Mus musculus RIKEN cDNA 1700028I16 gene (1700028I16Rik), long non-coding RNA [NR_038042]	NR_038042	NR_038042	70003	chr10	82286905	82286964	+	33555	90	132	A_55_P2076524	FALSE	Mm.48789			ref|NR_038042|gb|AK006461|tc|TC1599704|riken|1700028I16	chr10:82286905-82286964	mm|10qC1	GO:0003674(molecular_function)|GO:0005575(cellular_component)|GO:0008150(biological_process)	TTATAAATCAAGCTGATCTGGAACTCACCAATATCCACCGCCTCTGCCTCTCATTGTTGG			0
A_66_P129893	1700047M11Rik	RIKEN cDNA 1700047M11 gene	Mus musculus RIKEN cDNA 1700047M11 gene (1700047M11Rik), long non-coding RNA [NR_015458]	NR_015458	NR_015458	67330	chr1	184233325	184233384	+	1772	187	66	A_66_P129893	FALSE	Mm.331019			ref|NR_015458|gb|AK006718|tc|TC1610792|riken|1700047M11	chr1:184233325-184233384	mm|1qH5		TTCCCTGGGCTGCTGGGTTTACTTGAGAAATCATAAAATGACTTTTGTGTGTTTATTCTT			0
A_55_P2009640	1700048O20Rik	RIKEN cDNA 1700048O20 gene	Mus musculus RIKEN cDNA 1700048O20 gene (1700048O20Rik), long non-coding RNA [NR_033553]	NR_033553	NR_033553	69430	chr9	121855717	121855776	+	40807	68	60	A_55_P2009640	FALSE	Mm.482910	ENSMUST00000063103		ref|NR_033553|ens|ENSMUST00000063103|gb|BC048726|tc|TC1602657	chr9:121855717-121855776	mm|9qF4	GO:0003674(molecular_function)|GO:0005575(cellular_component)|GO:0008150(biological_process)	TCAATCAATATGTAACTGGTGAGCTTTCAAATGCTTCTTCATGCATCTTTAGGCTTGGTT			0
A_51_P495730	1700049L16Rik	hematological and neurological expressed 1-like pseudogene	Mus musculus RIKEN cDNA 1700049L16 gene (1700049L16Rik), non-coding RNA [NR_003644]	NR_003644	NR_003644	108950	chr10	71442798	71442739	-	26340	112	130	A_51_P495730	FALSE	Mm.212793	ENSMUST00000049520		ref|NR_003644|ens|ENSMUST00000049520|gb|AK075762|gb|BC048504	chr10:71442798-71442739	mm|10qB5.3		ACAGGGTATTGAATGTTAGTGTTTCCTTTAACCCGAATGAGTTAGGGGTGGGAGAGGGTT			0
A_52_P32353	1700054M17Rik	RIKEN cDNA 1700054M17 gene	Mus musculus RIKEN cDNA 1700054M17 gene (1700054M17Rik), long non-coding RNA [NR_045919]	NR_045919	NR_045919	73358	chr2	118133815	118133874	+	35825	83	184	A_52_P32353	FALSE	Mm.437192			ref|NR_045919|gb|AK006785|gb|BY706771|tc|TC1664174	chr2:118133815-118133874	mm|2qE5		ACAAGATCGAAAGAGAACCTAATGCTGACTGCTAAGGAAATGGGAAAATGCAAACCGAAC			0
A_66_P125161	1700057H15Rik	RIKEN cDNA 1700057H15 gene	Mus musculus RIKEN cDNA 1700057H15 gene (1700057H15Rik), long non-coding RNA [NR_040774]	NR_040774	NR_040774	78460	chr4	124127204	124127145	-	50996	37	18	A_66_P125161	FALSE	Mm.452060			ref|NR_040774|gb|AK132134|riken|3110093C09	chr4:124127204-124127145	mm|4qD2.2		ATGGCGAGGGGGATGCTTTTCCTTCCTGCAGTCTTCCCTTTCTGCAGATGAATAGGAACG			0
A_55_P1977402	1700060C20Rik	RIKEN cDNA 1700060C20 gene	Mus musculus RIKEN cDNA 1700060C20 gene (1700060C20Rik), long non-coding RNA [NR_036606]	NR_036606	NR_036606	73399	chr2	158021358	158021417	+	17158	140	126	A_55_P1977402	FALSE	Mm.416861			ref|NR_036606|gb|AK006839|gb|CN834080|tc|TC1628910	chr2:158021358-158021417	mm|2qH1	GO:0003674(molecular_function)|GO:0005575(cellular_component)|GO:0008150(biological_process)	TTTGTTATCCAAGTGAGTGGCAGTTTGGGCTGCCTAAGGACAATTCCTTGACAAGGTAAC			0
A_55_P2019694	1700061G19Rik	RIKEN cDNA 1700061G19 gene	Mus musculus RIKEN cDNA 1700061G19 gene (1700061G19Rik), mRNA [NM_030141]	NM_030141	NM_030141	78625	chr17	57028105	57028164	+	49241	42	248	A_55_P2019694	FALSE	Mm.160106	ENSMUST00000025048		ref|NM_030141|ens|ENSMUST00000025048|ref|XM_006525142|gb|BC116283	chr17:057028105-057028164	mm|17qD	GO:0003674(molecular_function)|GO:0005575(cellular_component)|GO:0008150(biological_process)	AAGAGGAAATCCAGAAACTCTATGAGACTTCGACCTCCTAGGAACCCCATTCACCCTAAT			0
A_66_P120140	1700069B07Rik	RIKEN cDNA 1700069B07 gene	Mus musculus adult male testis cDNA, RIKEN full-length enriched library, clone:1700069B07 product:hypothetical protein, full insert sequence. [AK006919]		AK006919	76613	chr7	128851466	128851525	+	62358	2	254	A_66_P120140	FALSE	Mm.122538			gb|AK006919|tc|TC1602138|riken|1700069B07|nap|NAP091848-1	chr7:128851466-128851525	mm|7qF2	GO:0003674(molecular_function)|GO:0005575(cellular_component)|GO:0008150(biological_process)	ATCCTCTGAGCTCTCCCTTTAATCACTCAATAAACTGAGCATTTGCTCATTCATTCATTC			0
A_55_P2129107	1700084C01Rik	RIKEN cDNA 1700084C01 gene	Mus musculus RIKEN cDNA 1700084C01 gene (1700084C01Rik), mRNA [NM_001033185]	NM_001033185	NM_001033185	78465	chr1	171864633	171864692	+	30566	99	206	A_55_P2129107	FALSE	Mm.291078	ENSMUST00000094348		ref|NM_001033185|ens|ENSMUST00000094348|ref|XM_006497035|ref|XM_006497037	chr1:171864633-171864692	mm|1qH3	GO:0003674(molecular_function)|GO:0005575(cellular_component)|GO:0008150(biological_process)	TGCTTAGAGTGCCACCTGCTGGTCAAATGGCATAGCTATTTGCCTAGTTTTCTTTGAGGT	339512	CCDC190	0
A_51_P428297	1700084M14Rik	Gm5941 pseudogene	Mus musculus RIKEN cDNA 1700084M14 gene (1700084M14Rik), non-coding RNA [NR_126536]	NR_126536	NR_126536	73487	chrX	88820654	88820595	-	14756	148	9	A_51_P428297	FALSE	Mm.296811			ref|NR_126536|gb|AK006997|gb|BC048745|gb|BC100410	chrX:88820654-88820595	mm|XqC1	GO:0003674(molecular_function)|GO:0005575(cellular_component)|GO:0008150(biological_process)	GCTTGGTAGCTGAGCTGTGCCAAACTGTGTAGTCTCATTATATAATAAGTACTACACAGT			0
A_51_P363642	1700088E04Rik	RIKEN cDNA 1700088E04 gene	Mus musculus RIKEN cDNA 1700088E04 gene (1700088E04Rik), mRNA [NM_138581]	NM_138581	NM_138581	27660	chr15	78965388	78965329	-	14781	147	288	A_51_P363642	FALSE	Mm.390827	ENSMUST00000169604		ref|NM_138581|ens|ENSMUST00000169604|ens|ENSMUST00000190959|ref|XM_006521048	chr15:078965388-078965329	mm|15qE1	GO:0003674(molecular_function)|GO:0005575(cellular_component)|GO:0008150(biological_process)	GCCGCAGAGTAGTGTCATAGCTACTGTGTTTCTTTCTCTAGGGAAAAGCCCCAGGCACAC	84645	C22orf23	0
A_55_P2226356	1700095A13Rik	RIKEN cDNA 1700095A13 gene	AGENCOURT_10522228 NIH_MGC_169 Mus musculus cDNA clone IMAGE:6704294 5', mRNA sequence [BU936515]		BU936515	76995	chr18	83275853	83275794	-	52868	31	210	A_55_P2226356	FALSE	Mm.392425			gb|BU936515	unmapped			AAAGCCTTTCCTAGGACCCATTTCCTTTTGGGCGCGCCGCGGGGCCCCAATTAAAGGTAA			0
A_55_P2342030	1700101I11Rik	RIKEN cDNA 1700101I11 gene	Mus musculus adult male hypothalamus cDNA, RIKEN full-length enriched library, clone:A230018J24 product:hypothetical protein, full insert sequence. [AK138162]		AK138162	100504641	chr6	129482087	129482028	-	51028	37	281	A_55_P2342030	FALSE	Mm.398286			gb|AK138162|riken|A230018J24	chr6:129482087-129482028	mm|6qF3		CCCACTTCTTGGTTTTCTCCTGGTAATCTTTCTTACATATGAAGACAAATGAATTGGTAT			0
A_55_P2140216	1700102H20Rik	RIKEN cDNA 1700102H20 gene	Mus musculus RIKEN cDNA 1700102H20 gene (1700102H20Rik), transcript variant 1, long non-coding RNA [NR_045302]	NR_045302	NR_045302	68230	chr17	3559773	3559832	+	16567	142	323	A_55_P2140216	FALSE	Mm.431352			ref|NR_045302|ref|NR_045303|gb|AK015782|tc|TC1642584	chr17:3559773-3559832	mm|17qA1	GO:0003674(molecular_function)|GO:0005575(cellular_component)|GO:0008150(biological_process)	GACTACTAAAATCACACAATAAAAATATGCAAACCCACCAAACCAACACACATGGCTTTA			0
A_51_P313397	1700121C10Rik	RIKEN cDNA 1700121C10 gene	Mus musculus adult male testis cDNA, RIKEN full-length enriched library, clone:1700121C10 product:unclassifiable, full insert sequence. [AK007220]		AK007220	67364	chr8	97318195	97318136	-	8656	166	74	A_51_P313397	FALSE	Mm.245984			gb|AK007220|gb|AK018972|gb|BY707324|tc|TC1691081	chr8:97318195-97318136	mm|8qC5	GO:0003674(molecular_function)|GO:0005575(cellular_component)|GO:0008150(biological_process)	ACCAGTCTCTCTGATCATCTTCCTACGTACTCCCCTTTAGATGATCACTTATATTGTCTG			0
A_55_P2227217	1700123M08Rik	RIKEN cDNA 1700123M08 gene	Mus musculus adult male aorta and vein cDNA, RIKEN full-length enriched library, clone:A530052A14 product:unclassifiable, full insert sequence. [AK040963]		AK040963	100503636	chr4	11901003	11901062	+	40443	69	132	A_55_P2227217	FALSE	Mm.209078			gb|AK040963|riken|A530052A14	chr4:11901003-11901062	mm|4qA1		GAAGAGAGATGCACTTGTTTGGAAAGGAACACCTGCTTATTGGCCTAATCACATCTGCAT			0
A_52_P308413	1810011H11Rik	RIKEN cDNA 1810011H11 gene	Mus musculus RIKEN cDNA 1810011H11 gene (1810011H11Rik), mRNA [NM_001163616]	NM_001163616	NM_001163616	69069	chr14	33630901	33630960	+	51925	34	128	A_52_P308413	FALSE	Mm.261609	ENSMUST00000039191		ref|NM_001163616|ens|ENSMUST00000039191|ref|XR_383209|gb|AK007434	chr14:033630901-033630960	mm|14qB	GO:0003674(molecular_function)|GO:0005575(cellular_component)|GO:0008150(biological_process)	TGGTGAAAGAGGAACTATTTTTCAAAACGAAGTGCCGCATTAAAATAACGTCTGGAGTCC	170371	C10orf128	0
A_55_P2146590	1810011O10Rik	RIKEN cDNA 1810011O10 gene	Mus musculus RIKEN cDNA 1810011O10 gene (1810011O10Rik), mRNA [NM_026931]	NM_026931	NM_026931	69068	chr8	25549107	25549048	-	23768	120	26	A_55_P2146590	FALSE	Mm.25775			ref|NM_026931|gb|AK007441|gb|BC016562|tc|TC1579520	chr8:025549107-025549048	mm|8qA2	GO:0003674(molecular_function)|GO:0005634(nucleus)|GO:0005737(cytoplasm)|GO:0006915(apoptotic process)	ACAAAAGACAAGCTTCTTCAGTTTCTCAAACTGCGGAAATATTCCATCAAGGTACACTGA	56892	C8orf4	0
A_51_P112308	1810011O10Rik	RIKEN cDNA 1810011O10 gene	Mus musculus RIKEN cDNA 1810011O10 gene (1810011O10Rik), mRNA [NM_026931]	NM_026931	NM_026931	69068	chr8	25548213	25548154	-	442	191	102	A_51_P112308	FALSE	Mm.25775	ENSMUST00000052622		ref|NM_026931|ens|ENSMUST00000052622|gb|AK007441|gb|BC016562	chr8:025548213-025548154	mm|8qA2	GO:0003674(molecular_function)|GO:0005634(nucleus)|GO:0005737(cytoplasm)|GO:0006915(apoptotic process)	CTCCAGACACTGTAGTAAGCATTAGGAAATGAATATGGGGGATTTTAGAAGGATGCTGTG	56892	C8orf4	0
A_66_P140223	1810024B03Rik	RIKEN cDNA 1810024B03 gene	Mus musculus RIKEN cDNA 1810024B03 gene (1810024B03Rik), mRNA [NM_198630]	NM_198630	NM_198630	329509	chr2	127012227	127012168	-	23618	120	326	A_66_P140223	FALSE	Mm.120738	ENSMUST00000056146		ref|NM_198630|ens|ENSMUST00000056146|ref|XM_006499777|ref|XM_006499778	chr2:127012227-127012168	mm|2qF1	GO:0003674(molecular_function)|GO:0005575(cellular_component)|GO:0008150(biological_process)	TAATTTGTTCCAGCTAACCTAGTCAACTTGTACAGCCACCCATAGGGTCTGTTTTTATTC			0
A_55_P2126444	1810032O08Rik	RIKEN cDNA 1810032O08 gene	Mus musculus RIKEN cDNA 1810032O08 gene (1810032O08Rik), transcript variant 3, long non-coding RNA [NR_027821]	NR_027821	NR_027821	66293	chr11	116536738	116536797	+	20025	131	296	A_55_P2126444	FALSE	Mm.432051	ENSMUST00000106378		ref|NR_027821|ens|ENSMUST00000106378|gb|AK037979|gb|BC055707	chr11:116536738-116536797	mm|11qE2	GO:0003674(molecular_function)|GO:0005575(cellular_component)|GO:0008150(biological_process)	ACTATCTGATAATGCTTGTTCCTAAAGTTTGTAGTTTTGATCACTTAGCTGCCTGTCTCC			0
A_55_P2126448	1810032O08Rik	RIKEN cDNA 1810032O08 gene	Mus musculus RIKEN cDNA 1810032O08 gene (1810032O08Rik), transcript variant 3, long non-coding RNA [NR_027821]	NR_027821	NR_027821	66293	chr11	116537048	116537107	+	23056	122	138	A_55_P2126448	FALSE	Mm.432051	ENSMUST00000142834		ref|NR_027821|ref|NR_027819|ref|NR_027820|ens|ENSMUST00000142834	chr11:116537048-116537107	mm|11qE2	GO:0003674(molecular_function)|GO:0005575(cellular_component)|GO:0008150(biological_process)	GGATTTCCTGGAAGTCAGGGTTGGCCTTTGTATTTTGAAGCACAAATAAACTTTATAAAA			0
A_55_P2033376	1810041L15Rik	RIKEN cDNA 1810041L15 gene	Mus musculus RIKEN cDNA 1810041L15 gene (1810041L15Rik), mRNA [NM_001163145]	NM_001163145	NM_001163145	72301	chr15	84209705	84209646	-	20150	131	46	A_55_P2033376	FALSE	Mm.275387	ENSMUST00000080751		ref|NM_001163145|ens|ENSMUST00000080751|ref|XM_006521445|ref|XM_006521441	chr15:084209705-084209646	mm|15qE2	GO:0003674(molecular_function)|GO:0005575(cellular_component)|GO:0008150(biological_process)|GO:0016020(membrane)|GO:0016021(integral to membrane)	GCTGCGTTTGTCTTTCTATAGAGTGGTTTTTATAACGACGTCCTTAGTTTTAATAAAGGA	85352	KIAA1644	0
A_55_P2033381	1810041L15Rik	RIKEN cDNA 1810041L15 gene	Mus musculus RIKEN cDNA 1810041L15 gene (1810041L15Rik), mRNA [NM_001163145]	NM_001163145	NM_001163145	72301	chr15	84214211	84214152	-	42714	62	182	A_55_P2033381	FALSE	Mm.275387	ENSMUST00000080751		ref|NM_001163145|ens|ENSMUST00000080751|ref|XM_006521445|ref|XM_006521441	chr15:084214211-084214152	mm|15qE2	GO:0003674(molecular_function)|GO:0005575(cellular_component)|GO:0008150(biological_process)|GO:0016020(membrane)|GO:0016021(integral to membrane)	ACAACTGTGAACCAGTGGAGTCGGTAGGCACAGTGCCTAACCTTCCTGTCCATGCCGCAA	85352	KIAA1644	0
A_55_P1982986	1810043G02Rik	RIKEN cDNA 1810043G02 gene	Mus musculus RIKEN cDNA 1810043G02 gene (1810043G02Rik), mRNA [NM_026431]	NM_026431	NM_026431	67884	chr10	77446276	77446335	+	62805	1	16	A_55_P1982986	FALSE	Mm.297512	ENSMUST00000116237		ref|NM_026431|ens|ENSMUST00000116237|ens|ENSMUST00000149074|ens|ENSMUST00000123999	chr10:077446276-077446335	mm|10qC1	GO:0003674(molecular_function)|GO:0005737(cytoplasm)|GO:0005886(plasma membrane)|GO:0007010(cytoskeleton organization)|GO:0007224(smoothened signaling pathway)|GO:0008360(regulation of cell shape)|GO:0030030(cell projection organization)|GO:0060271(cilium morphogenesis)	TACCACAGACCAGTCTCCTTCCTTCTCACCAAGGGACACGATGAGGAGTCACAAGAATAG	755	C21orf2	0
A_52_P198727	1810043G02Rik	RIKEN cDNA 1810043G02 gene	Mus musculus RIKEN cDNA 1810043G02 gene (1810043G02Rik), mRNA [NM_026431]	NM_026431	NM_026431	67884	chr10	77447299	77447358	+	23169	122	239	A_52_P198727	FALSE	Mm.297512	ENSMUST00000149074		ref|NM_026431|ens|ENSMUST00000149074|ens|ENSMUST00000123999|ens|ENSMUST00000136275	chr10:077447299-077447358	mm|10qC1	GO:0003674(molecular_function)|GO:0005737(cytoplasm)|GO:0005886(plasma membrane)|GO:0007010(cytoskeleton organization)|GO:0007224(smoothened signaling pathway)|GO:0008360(regulation of cell shape)|GO:0030030(cell projection organization)|GO:0060271(cilium morphogenesis)	ACGCCCCAGTATCTGGACCCTTTTATATCCTGAGGAAACACAGCCCTACCTGGAAAGCCT	755	C21orf2	0
A_55_P2002772	1810053B23Rik	RIKEN cDNA 1810053B23 gene	Mus musculus RIKEN cDNA 1810053B23 gene (1810053B23Rik), transcript variant 6, long non-coding RNA [NR_040491]	NR_040491	NR_040491	69857	chr16	93347133	93347074	-	44321	57	248	A_55_P2002772	FALSE	Mm.81192			ref|NR_040491|ref|NR_040487|gb|AK160437|tc|TC1670079	chr16:93347133-93347074	mm|16qC4		TCATGTGCTCCTTCCCCTAAGACACAGACGTAAGCACACAATCAATTTATAACGAAAAAA			0
A_55_P2207342	1810059H22Rik	RIKEN cDNA 1810059H22 gene	Mus musculus 21 days neonate cerebellum cDNA, RIKEN full-length enriched library, clone:G630085G17 product:unclassifiable, full insert sequence. [AK144510]		AK144510	69820	chr5	149770564	149770505	-	37859	77	52	A_55_P2207342	FALSE	Mm.281060			gb|AK144510|tc|TC1687180|riken|G630085G17	chr5:149770564-149770505	mm|5qG3		AGCCTGAATATTACTATCCTGTGCGGCCAGGAGCAGAAGAGTTTCGTTTCACTGTTTCTA			0
A_55_P1979335	1810062G17Rik	RIKEN cDNA 1810062G17 gene	Mus musculus RIKEN cDNA 1810062G17 gene (1810062G17Rik), mRNA [NM_028183]	NM_028183	NM_028183	72282	chr3	36381109	36381168	+	41667	65	308	A_55_P1979335	FALSE	Mm.55317	ENSMUST00000029268		ref|NM_028183|ens|ENSMUST00000029268|gb|AK007933|tc|TC1590700	chr3:036381109-036381168	mm|3qB	GO:0003674(molecular_function)|GO:0005575(cellular_component)|GO:0008150(biological_process)	CGCCTTATCATTGTATTTTATGTCCAGAAAGTAAAACTACAGAATCCATTGCTATGCTCA			0
A_55_P2190010	2010110K18Rik	RIKEN cDNA 2010110K18 gene	Mus musculus 10 days neonate skin cDNA, RIKEN full-length enriched library, clone:4732498B17 product:unclassifiable, full insert sequence. [AK029153]		AK029153	100503082	chr18	34916237	34916296	+	32083	95	123	A_55_P2190010	FALSE	Mm.33719			gb|AK029153|tc|TC1624142|riken|4732498B17|nap|NAP075306-1	chr18:34916237-34916296	mm|18qB1	GO:0003674(molecular_function)|GO:0005575(cellular_component)|GO:0008150(biological_process)	GGCTCTGGGAAGGTGAAAGTAAGAGGAACAGGAGTTTTATTTATGTTAAGTAACATAAAT			0
A_52_P155805	2010204K13Rik	RIKEN cDNA 2010204K13 gene	Mus musculus RIKEN cDNA 2010204K13 gene (2010204K13Rik), transcript variant 1, long non-coding RNA [NR_027924]	NR_027924	NR_027924	68355	chrX	7000074	7000015	-	12125	156	23	A_52_P155805	FALSE	Mm.45111			ref|NR_027924|gb|AK008437|gb|AF038507|tc|TC1590916	chrX:7000074-7000015	mm|XqA1.1	GO:0003674(molecular_function)|GO:0005575(cellular_component)|GO:0008150(biological_process)	CGAGCTTCCTCCAAGTTTGGACCTTAGTGGGCCGGATGATTTGGAACTTGGAGAACTGAG			0
A_55_P2155644	2010315B03Rik	RIKEN cDNA 2010315B03 gene	Mus musculus RIKEN cDNA 2010315B03 gene (2010315B03Rik), transcript variant 1, mRNA [NM_001243117]	NM_001243117	NM_001243117	630836	chr9_random	204051	203992	-	8955	165	132	A_55_P2155644	FALSE	Mm.458553	ENSMUST00000177714		ref|NM_001243117|ref|NM_001243118|ref|NM_001243119|ens|ENSMUST00000177714	chr9_random:000204051-000203992			CCCTATGAATGTAACCAATTTGGTAAAATATTTGCACAACATAGTACTGTCCACAGCATA		ZNF788	0
A_51_P502872	2200002D01Rik	RIKEN cDNA 2200002D01 gene	Mus musculus RIKEN cDNA 2200002D01 gene (2200002D01Rik), mRNA [NM_028179]	NM_028179	NM_028179	72275	chr7	30032921	30032700	-	31649	96	8	A_51_P502872	FALSE	Mm.441142	ENSMUST00000151339		ref|NM_028179|ens|ENSMUST00000151339|gb|AK033738|gb|AK008617	unmapped		GO:0003674(molecular_function)|GO:0005730(nucleolus)|GO:0008150(biological_process)	GGGAAGGAGTATGCCGCTGGCTGCAAGAAGCATGAACGCTCCTCAGACAAGGCCAAGAAA			0
A_51_P255657	2210011C24Rik	RIKEN cDNA 2210011C24 gene	Mus musculus RIKEN cDNA 2210011C24 gene (2210011C24Rik), mRNA [NM_001291292]	NM_001291292	NM_001291292	70134	chr8	86534216	86534157	-	47578	47	294	A_51_P255657	FALSE	Mm.41017	ENSMUST00000190457		ref|NM_001291292|gb|AK008705|ens|ENSMUST00000190457|gb|XM_985599	chr8:086534216-086534157	mm|8qC3	GO:0003674(molecular_function)|GO:0005575(cellular_component)|GO:0008150(biological_process)	AACCACCTTTCTCCATAAAATTCTCTAGTCTTCCTTGGAAACCCTGCAAAACCTATGAGT	113230	MIR1199	0
A_55_P2405436	2210408F21Rik	RIKEN cDNA 2210408F21 gene	Mus musculus adult male olfactory brain cDNA, RIKEN full-length enriched library, clone:6430562D13 product:unclassifiable, full insert sequence. [AK078276]		AK078276	73652	chr6	31241583	31241642	+	53540	29	178	A_55_P2405436	FALSE	Mm.441297			gb|AK078276|gb|BB047764|tc|TC1622160|riken|6430562D13	chr6:31241583-31241642	mm|6qA3.3	GO:0003674(molecular_function)|GO:0005575(cellular_component)|GO:0008150(biological_process)	GCCTGCAATAAGATTGTGTAAAGTCTTTGTTTTGAGATGTGCACATTTTTTGTATTTCCC			0
A_52_P76355	2210408I21Rik	RIKEN cDNA 2210408I21 gene	Mus musculus RIKEN cDNA 2210408I21 gene (2210408I21Rik), transcript variant 1, mRNA [NM_001145676]	NM_001145676	NM_001145676	72371	chr13	77471581	77471640	+	30091	101	171	A_52_P76355	FALSE	Mm.81475	ENSMUST00000168779		ref|NM_001145676|ens|ENSMUST00000168779|ref|XM_011244563|ref|XM_006517397	chr13:077471581-077471640	mm|13qC1	GO:0003674(molecular_function)|GO:0005575(cellular_component)|GO:0008150(biological_process)	ACTGTTTGCTATGAATGGCTCAGAAGAAAAGCCATTACTCATCAGACCTTTGAAGGTAGC	285600	KIAA0825	0
A_55_P2071082	2310002D06Rik	RIKEN cDNA 2310002D06 gene	Mus musculus RIKEN cDNA 2310002D06 gene (2310002D06Rik), long non-coding RNA [NR_045490]	NR_045490	NR_045490	69522	chr12	81618882	81618941	+	6771	172	235	A_55_P2071082	FALSE	Mm.390530			ref|NR_045490|gb|AK009088|tc|TC1659407|riken|2310002D06	chr12:81618882-81618941	mm|12qC3	GO:0003674(molecular_function)|GO:0005575(cellular_component)|GO:0008150(biological_process)	AGGAATCATTTCTGTAGTTCGTTACTGAAGACCAGTTTGCAATAAATTATTTCTTCCTCC			0
A_55_P2288285	2310007J06Rik	RIKEN cDNA 2310007J06 gene	Mus musculus adult male tongue cDNA, RIKEN full-length enriched library, clone:2310007J06 product:unclassifiable, full insert sequence. [AK009210]		AK009210	69489	chr14	51508450	51508391	-	30693	99	279	A_55_P2288285	FALSE	Mm.150495			gb|AK009210|gb|BE948719|riken|2310007J06|nap|NAP090687-1	chr14:51508450-51508391	mm|14qC1		CACCATGATGGGGTAAATGTCTATGTTTAAGATAGGCAAGGAATATAGTTGAAAATGAGA			0
A_51_P470630	2310014L17Rik	RIKEN cDNA 2310014L17 gene	Mus musculus RIKEN cDNA 2310014L17 gene (2310014L17Rik), mRNA [NM_029809]	NM_029809	NM_029809	381845	chr7	13516229	13516288	+	58718	13	318	A_51_P470630	FALSE	Mm.439896	ENSMUST00000045870		ref|NM_029809|ens|ENSMUST00000045870|gb|AK028523|tc|TC1584415	chr7:013516229-013516288	mm|7qA1	GO:0003674(molecular_function)|GO:0005575(cellular_component)|GO:0008150(biological_process)|GO:0008270(zinc ion binding)|GO:0016020(membrane)|GO:0016021(integral to membrane)|GO:0046872(metal ion binding)	AAAGGAATATACTGGACCCATTTATCCAGACAATCAAAGACAATTACCCAACTCAAGATT	646862	RNF225	0
A_51_P518926	2310047M10Rik	RIKEN cDNA 2310047M10 gene	Mus musculus RIKEN cDNA 2310047M10 gene (2310047M10Rik), mRNA [NM_028005]	NM_028005	NM_028005	71923	chr11	68874564	68874623	+	49884	40	274	A_51_P518926	FALSE	Mm.340257	ENSMUST00000051888		ref|NM_028005|ens|ENSMUST00000051888|gb|AK009886|gb|AK151629	chr11:068874564-068874623	mm|11qB3	GO:0005515(protein binding)|GO:0005575(cellular_component)|GO:0008150(biological_process)	GAAGTTGTGAGGATTCTCCTGGTGAAAAGGGATGTAGCTCTGCTTTTATTCAGTTGGCCA	54785	BORCS6	0
A_52_P638513	2310061J03Rik	RIKEN cDNA 2310061J03 gene	Mus musculus RIKEN cDNA 2310061J03 gene (2310061J03Rik), long non-coding RNA [NR_027965]	NR_027965	NR_027965	66391	chr16	55973524	55973465	-	4417	179	24	A_52_P638513	FALSE	Mm.472722			ref|NR_027965|gb|AK010004|gb|AK006543|gb|BC017620	chr16:55973524-55973465	mm|16qC1.1		GCAGTATTACCGAGCATTAAGTGCTTCAGTGTTACGAATTTTCTCCAAACTACCTAAGTA			0
A_66_P111430	2410006H16Rik	RIKEN cDNA 2410006H16 gene	Mus musculus RIKEN cDNA 2410006H16 gene (2410006H16Rik), long non-coding RNA [NR_030738]	NR_030738	NR_030738	69221	chr11	62418244	62418303	+	633	191	47	A_66_P111430	FALSE	Mm.270874			ref|NR_030738|gb|AK157519|gb|AK010427|gb|DV059485	chr11:62418244-62418303	mm|11qB2	GO:0003674(molecular_function)|GO:0005575(cellular_component)|GO:0008150(biological_process)	TGGTAATCCTGTCTGTACCACAGGATCTTCTATGCCTTTTAAAAATAAACATTTGTTTAT			0
A_55_P2201395	2410017I17Rik	RIKEN cDNA 2410017I17 gene	Mus musculus ES cells cDNA, RIKEN full-length enriched library, clone:C330041H23 product:hypothetical protein, full insert sequence. [AK082845]		AK082845	675325	chr17	36299990	36300049	+	10127	162	83	A_55_P2201395	FALSE	Mm.75890			gb|AK082845|riken|C330041H23|nap|NAP089901-1	chr17:36299990-36300049	mm|17qB1	GO:0003674(molecular_function)|GO:0005575(cellular_component)|GO:0008150(biological_process)	TACTCCAGCATCCTGTGAGTCAGATGGACATTTAGTGATCTTTTTGCAAGGTTTAAAAAA			0
A_55_P2018479	2410127L17Rik	RIKEN cDNA 2410127L17 gene	Mus musculus RIKEN cDNA 2410127L17 gene (2410127L17Rik), mRNA [NM_026120]	NM_026120	NM_026120	67383	chr19	18778699	18778758	+	17767	138	220	A_55_P2018479	FALSE	Mm.306602	ENSMUST00000025632		ref|NM_026120|ens|ENSMUST00000025632|gb|BC092281|gb|AK004202	chr19:018778699-018778758	mm|19qB	GO:0003674(molecular_function)|GO:0005575(cellular_component)|GO:0008150(biological_process)	GACACAACCTCAAATCAGTGGTGCCTTCTTATTCCTAACAAAATTTAGAAATAGTGTCTA	138199	CARNMT1	0
A_51_P487913	2600006K01Rik	RIKEN cDNA 2600006K01 gene	Mus musculus 10 days embryo whole body cDNA, RIKEN full-length enriched library, clone:2600006K01 product:hypothetical Lipocalin-related protein and Bos/Can/Equ allergen containing protein, full insert sequence. [AK011165]		AK011165	70319	chr2	29724631	29724572	-	21580	127	137	A_51_P487913	FALSE	Mm.410850			gb|AK011165|tc|TC1594000|riken|2600006K01|nap|NAP095208-001	chr2:29724631-29724572	mm|2qB	GO:0003674(molecular_function)|GO:0005575(cellular_component)|GO:0008150(biological_process)	CCTGAGGCAGTAACTCCACATACCCAGCAGATGACGCGATGAGTTGGAGAGCAAGCCCAA			0
A_52_P121051	2610001J05Rik	RIKEN cDNA 2610001J05 gene	Mus musculus RIKEN cDNA 2610001J05 gene (2610001J05Rik), long non-coding RNA [NR_024619]	NR_024619	NR_024619	66520	chr6	13820211	13820152	-	46166	52	165	A_52_P121051	FALSE	Mm.29615			ref|NR_024619|gb|AK136158|gb|AK002763|gb|BC070405	chr6:13820211-13820152	mm|6qA1	GO:0003674(molecular_function)|GO:0005575(cellular_component)|GO:0008150(biological_process)	TATTTCATACTTTCAAGTTGTCAGAGCACATGGAATTGGAAGATGGAAGTATTTGTTCAG			0
A_55_P2281095	2610002M06Rik	RIKEN cDNA 2610002M06 gene	Mus musculus RIKEN cDNA 2610002M06 gene (2610002M06Rik), mRNA [NM_025921]	NM_025921	NM_025921	67028	chrX	104978160	104978101	-	50929	37	152	A_55_P2281095	FALSE	Mm.37274	ENSMUST00000120722		ref|NM_025921|ens|ENSMUST00000120722|gb|AK018397|tc|TC1643020	chrX:104978160-104978101	mm|XqD	GO:0003674(molecular_function)|GO:0005575(cellular_component)|GO:0005737(cytoplasm)|GO:0005768(endosome)|GO:0006810(transport)|GO:0007034(vacuolar transport)|GO:0007049(cell cycle)|GO:0008150(biological_process)|GO:0015031(protein transport)|GO:0016020(membrane)|GO:0051301(cell division)	TCAAACTGGAGGGAATGTAAATGATGGATATGTCAGTGCTCAATAAACAGTTCTAGAATG			0
A_55_P2342264	2610008G14Rik	RIKEN cDNA 2610008G14 gene	Mus musculus 10 days embryo whole body cDNA, RIKEN full-length enriched library, clone:2610008G14 product:unclassifiable, full insert sequence. [AK011347]		AK011347	70320	chr4	32049671	32049612	-	35300	85	249	A_55_P2342264	FALSE	Mm.101096			gb|AK011347|gb|AW456884|riken|2610008G14|nap|NAP024246-001	chr4:32049671-32049612	mm|4qA5		TTAAAATTAGTGACCAAGGATGCGCTCTTGAGAATGTCAAGTCCTGCGCTTCCTAACAGG			0
A_55_P2255146	2610020C07Rik	RIKEN cDNA 2610020C07 gene	Mus musculus RIKEN cDNA 2610020C07 gene (2610020C07Rik), long non-coding RNA [NR_038156]	NR_038156	NR_038156	69918	chr16	11225769	11225828	+	37533	78	48	A_55_P2255146	FALSE	Mm.440400			ref|NR_038156|gb|AK029005|tc|TC1599257|riken|4732480M16	chr16:11225769-11225828	mm|16qA1	GO:0003674(molecular_function)|GO:0005575(cellular_component)|GO:0008150(biological_process)	GCAGGTCACTCCTCAATTAAGGAGGTATTTACCTAGAAAGCATTAAAAACATCAATTTGT			0
A_55_P2043028	2610020H08Rik	RIKEN cDNA 2610020H08 gene	Mus musculus RIKEN cDNA 2610020H08 gene (2610020H08Rik), transcript variant 2, mRNA [NM_028129]	NM_028129	NM_028129	434234	chr7	126992386	126992445	+	54171	27	228	A_55_P2043028	FALSE	Mm.38237	ENSMUST00000084644		ref|NM_028129|ref|NM_001004187|ens|ENSMUST00000084644|ens|ENSMUST00000133758	chr7:126992386-126992445	mm|7qF2	GO:0003674(molecular_function)|GO:0005730(nucleolus)|GO:0008150(biological_process)|GO:0070062(extracellular vesicular exosome)	CAGATAGCTTTGGGATACCCTCTAAAGTATATTGTCATGTTCAAAATTCCAATAAATGCC	81691		0
A_55_P2354531	2610029K11Rik	RIKEN cDNA 2610029K11 gene	Mus musculus 10 days embryo whole body cDNA, RIKEN full-length enriched library, clone:2610029K11 product:unclassifiable, full insert sequence. [AK011616]		AK011616	69250	chr17	34765575	34765634	+	33779	90	11	A_55_P2354531	FALSE	Mm.393606			gb|AK011616|gb|BY652773|tc|TC1627435|riken|2610029K11	chr17:34765575-34765634	mm|17qB1		TTCTGATTCTCCTGCTAGGTTTCTGCAAAAAAGGCTCAACTGGTGTAACCTCTGTAGAGG			0
A_55_P2361547	2610201A13Rik	RIKEN cDNA 2610201A13 gene	Mus musculus 10 days embryo whole body cDNA, RIKEN full-length enriched library, clone:2610201A13 product:unclassifiable, full insert sequence. [AK011855]		AK011855	70434	chr11	33050579	33050520	-	41959	65	51	A_55_P2361547	FALSE	Mm.432136			gb|AK011855|tc|TC1678410|riken|2610201A13|nap|NAP017560-001	chr11:33050579-33050520	mm|11qA4		GCACTGTAGAGGGAGATTAAGAGGTGATTGTGATTTGTCAAAATTGATGCATTAAAATGA			0
A_55_P2216536	2610209C05Rik	RIKEN cDNA 2610209C05 gene	Mus musculus B6-derived CD11 +ve dendritic cells cDNA, RIKEN full-length enriched library, clone:F730230P05 product:unclassifiable, full insert sequence. [AK155848]		AK155848	70449	chr6	54795954	54796013	+	40102	70	158	A_55_P2216536	FALSE	Mm.286149			gb|AK155848|riken|F730230P05	chr6:54795954-54796013	mm|6qB3		ATATGCCATACAGGGGAGAGAAGAGAACCAGTTTGTACAACAGTTTGTCAGTGAGGACAG			0
A_55_P2037081	2610305D13Rik	RIKEN cDNA 2610305D13 gene	Mus musculus RIKEN cDNA 2610305D13 gene (2610305D13Rik), mRNA [NM_145078]	NM_145078	NM_145078	112422	chr4	146986112	146986053	-	53798	28	318	A_55_P2037081	FALSE	Mm.327194	ENSMUST00000037565		ref|NM_145078|ens|ENSMUST00000037565|ens|ENSMUST00000105720|gb|BC032186	chr4:146986112-146986053	mm|4qE1	GO:0003674(molecular_function)|GO:0005575(cellular_component)|GO:0008150(biological_process)	CCCCCTTTTGTTCTAGTCAACAACTCCTTCACTAATGTATTGTAAATAAAGCTGAATGAT			0
A_55_P2029420	2610318N02Rik	RIKEN cDNA 2610318N02 gene	Mus musculus RIKEN cDNA 2610318N02 gene (2610318N02Rik), mRNA [NM_183287]	NM_183287	NM_183287	70458	chr16	17113551	17113492	-	43781	59	16	A_55_P2029420	FALSE	Mm.234165	ENSMUST00000093336		ref|NM_183287|ens|ENSMUST00000093336|ref|XM_006522539|ref|XM_006522540	chr16:017113551-017113492	mm|16qA3	GO:0003674(molecular_function)|GO:0005575(cellular_component)|GO:0008150(biological_process)	CCAGTAATCTCTTCCCAACAGACCATGCCCCAGGACTGAATAAAGTTCATCCTGGTGTTG			0
A_55_P2029417	2610318N02Rik	RIKEN cDNA 2610318N02 gene	Mus musculus RIKEN cDNA 2610318N02 gene (2610318N02Rik), mRNA [NM_183287]	NM_183287	NM_183287	70458	chr16	17113611	17113552	-	6543	173	35	A_55_P2029417	FALSE	Mm.234165	ENSMUST00000093336		ref|NM_183287|ens|ENSMUST00000093336|ref|XM_006522539|ref|XM_006522540	chr18:060586797-060586856	mm|18qD3	GO:0003674(molecular_function)|GO:0005575(cellular_component)|GO:0008150(biological_process)	ACCCAATGATGATTCAGAGAATGACCCTGGCAGCGCAGAGTCCACTCCTGCCAAGGAGAG			0
A_55_P2119025	2610318N02Rik	RIKEN cDNA 2610318N02 gene	Mus musculus RIKEN cDNA 2610318N02 gene (2610318N02Rik), mRNA [NM_183287]	NM_183287	NM_183287	70458	chr16	17123665	17123606	-	44198	58	165	A_55_P2119025	FALSE	Mm.234165	ENSMUST00000093336		ref|NM_183287|ens|ENSMUST00000093336|ref|XM_006522539|gb|BC039993	chr16:017123665-017123606	mm|16qA3	GO:0003674(molecular_function)|GO:0005575(cellular_component)|GO:0008150(biological_process)	AAACTAGGAACTCCAGGACCTTGTGGAGAGAAACAGATGTTCACCTCTTTGTATGGAAAA			0
A_55_P2368355	2610319H10Rik	RIKEN cDNA 2610319H10 gene	Mus musculus 10 days embryo whole body cDNA, RIKEN full-length enriched library, clone:2610319H10 product:unclassifiable, full insert sequence. [AK012053]		AK012053	72505	chr8	11622453	11622394	-	25153	116	207	A_55_P2368355	FALSE	Mm.482437			gb|AK012053|tc|TC1608658|tc|TC1735123|riken|2610319H10	chr8:11622453-11622394	mm|8qA1.1		AGTATTTTGATGACTAAGGGTGCAACTCAAAGGCAGAGTGCTTATTGTGTGTGTGGCCCA			0
A_66_P108468	2610528A11Rik	RIKEN cDNA 2610528A11 gene	Mus musculus RIKEN cDNA 2610528A11 gene (2610528A11Rik), mRNA [NM_001206684]	NM_001206684	NM_001206684	70045	chr14	37915426	37915367	-	507	191	299	A_66_P108468	FALSE	Mm.271619	ENSMUST00000179488		ref|NM_001206684|ens|ENSMUST00000179488|ens|ENSMUST00000191317|gb|AK012157	chr14:037915426-037915367	mm|14qB	GO:0003674(molecular_function)|GO:0005575(cellular_component)|GO:0008150(biological_process)	TAACACTTAACCACTGGTCTCCAAACCAACACCTGTAACTTCCTAATGAAATCATCAGGA	387695	C10orf99	0
A_51_P118539	2700049A03Rik	RIKEN cDNA 2700049A03 gene	Mus musculus RIKEN cDNA 2700049A03 gene (2700049A03Rik), transcript variant 1, mRNA [NM_001163378]	NM_001163378	NM_001163378	76967	chr12	72344154	72344213	+	7537	170	15	A_51_P118539	FALSE	Mm.87290	ENSMUST00000045907		ref|NM_001163378|ref|NM_029818|ens|ENSMUST00000045907|ref|XM_006516364	chr12:072344154-072344213	mm|12qC3	GO:0005515(protein binding)|GO:0005737(cytoplasm)|GO:0005813(centrosome)|GO:0005856(cytoskeleton)|GO:0007224(smoothened signaling pathway)|GO:0030030(cell projection organization)|GO:0036064(cilium basal body)|GO:0042384(cilium assembly)|GO:0060271(cilium morphogenesis)|GO:0070201(regulation of establishment of protein localization)	TGGCTGCAGACCATGTCTGTATACTGTTGGCCTTTGAACATATTTTTAGGGGAAATATTT	9786	KIAA0586	0
A_55_P2010704	2700094K13Rik	RIKEN cDNA 2700094K13 gene	Mus musculus RIKEN cDNA 2700094K13 gene (2700094K13Rik), transcript variant 2, mRNA [NM_001037279]	NM_001037279	NM_001037279	72657	chr2	84510228	84510169	-	19948	132	121	A_55_P2010704	FALSE	Mm.259293	ENSMUST00000154179		ref|NM_001037279|ref|NM_001033166|ens|ENSMUST00000154179|ens|ENSMUST00000102647	chr2:084510228-084510169	mm|2qD	GO:0008430(selenium binding)|GO:0045454(cell redox homeostasis)	TCAAATTTCCTGAGCCTCAAGAGGTGGTTGAAGAATTGAAGAAGTACCTTTCATAAAGAG	280636	C11orf31	0
A_51_P309589	2700099C18Rik	NDC80 homolog, kinetochore complex component pseudogene	Mus musculus RIKEN cDNA 2700099C18 gene (2700099C18Rik), non-coding RNA [NR_024720]	NR_024720	NR_024720	77022	chr17	95160893	95161809	+	5617	175	248	A_51_P309589	FALSE	Mm.440259	ENSMUST00000182402		ref|NR_024720|ens|ENSMUST00000182402|gb|AK012623|gb|AK132724	chr17:95160893-95161809	mm|17qE5		AGCACTAAATGAACAGATTGCAAGACTGGAGGAGGAAAGAGAAAGAGAACCGAATGCTTC			0
A_55_P2199694	2810002D19Rik	RIKEN cDNA 2810002D19 gene	H3144C07-3 NIA Mouse 15K cDNA Clone Set Mus musculus cDNA clone H3144C07 3', mRNA sequence [BG075185]		BG075185	66457	chr2	94255932	94255873	-	8196	168	9	A_55_P2199694	FALSE	Mm.437662			gb|BG075185	chr2:94255932-94255873	mm|2qE1	GO:0003674(molecular_function)|GO:0005575(cellular_component)|GO:0008150(biological_process)	CCAATAGGCCAAGAGTTCTCATACGTTCTACAGCTTGTTCCTGCCGTTCTTTTTCTTTTG			0
A_55_P2256423	2810019C22Rik	RIKEN cDNA 2810019C22 gene	Mus musculus 10, 11 days embryo whole body cDNA, RIKEN full-length enriched library, clone:2810019C22 product:unclassifiable, full insert sequence. [AK012763]		AK012763	72633	chr9	88342873	88342814	-	2440	185	42	A_55_P2256423	FALSE	Mm.32874			gb|AK012763|gb|BY363102|tc|TC1644665|riken|2810019C22	chr9:88342873-88342814	mm|9qE3.1		GGGAAAAAAGACATTTTAGAACCCTTTTAAATGCTAACACAATGCTGCCATTCTGGTAAA			0
A_55_P2064503	2810032G03Rik	RIKEN cDNA 2810032G03 gene	Mus musculus adult male testis cDNA, RIKEN full-length enriched library, clone:4930463A03 product:hypothetical protein, full insert sequence. [AK029678]		AK029678	72669	chr12	5423365	5423424	+	52578	32	134	A_55_P2064503	FALSE	Mm.10434			gb|AK029678|riken|4930463A03|nap|NAP074325-1	chr12:5423365-5423424	mm|12qA1.1	GO:0003674(molecular_function)|GO:0005575(cellular_component)|GO:0008150(biological_process)	CAGAGGACTTTCCTTCTGTTGACTTGAAAACAGGTTAATTCTTTCTGGGGTAAATTAAAT			0
A_55_P2383877	2810040C05Rik	RIKEN cDNA 2810040C05 gene	Mus musculus 10, 11 days embryo whole body cDNA, RIKEN full-length enriched library, clone:2810040C05 product:unclassifiable, full insert sequence. [AK012892]		AK012892	72719	chr4	34802853	34802794	-	20322	131	29	A_55_P2383877	FALSE				gb|AK012892|tc|TC1629331|riken|2810040C05	chr4:34802853-34802794	mm|4qA5		CATATACAAGACGGGGCAATCCAAAACAGCATAATATAATTTTCTCCAACTACTTGAGAA			0
A_55_P1952186	2810403A07Rik	RIKEN cDNA 2810403A07 gene	Mus musculus RIKEN cDNA 2810403A07 gene (2810403A07Rik), mRNA [NM_028814]	NM_028814	NM_028814	74200	chr3	88515649	88515708	+	23864	120	161	A_55_P1952186	FALSE	Mm.251800	ENSMUST00000029696		ref|NM_028814|ens|ENSMUST00000029696|ref|XR_867238|ref|XR_375590	chr3:088515649-088515708	mm|3qF1	GO:0003723(RNA binding)|GO:0005575(cellular_component)|GO:0008150(biological_process)	TAAAAATGCAAGTAGCTTTCCACAGGGCTGGAGTTTGGGCTATCAGTATCCTTCATCACA	22889	KIAA0907	0
A_55_P1960049	2810408A11Rik	RIKEN cDNA 2810408A11 gene	Mus musculus RIKEN cDNA 2810408A11 gene (2810408A11Rik), mRNA [NM_027419]	NM_027419	NM_027419	70419	chr11	69710919	69710860	-	45550	54	85	A_55_P1960049	FALSE	Mm.272859			ref|NM_027419|ref|XM_006534175|ref|XM_006537208|ref|XM_006534171	chr11:069710919-069710860	mm|11qB3	GO:0003674(molecular_function)|GO:0005575(cellular_component)|GO:0008150(biological_process)	TGAGGGTTGCCTTCCCTGTCTCCACTCTAATGGACAATAAAGAGAACATCAGGAATCTGA			0
A_66_P130612	2810408A11Rik	RIKEN cDNA 2810408A11 gene	Mus musculus RIKEN cDNA 2810408A11 gene (2810408A11Rik), mRNA [NM_027419]	NM_027419	NM_027419	70419	chr11	69712750	69712585	-	49888	40	266	A_66_P130612	FALSE	Mm.272859	ENSMUST00000142121		ref|NM_027419|ens|ENSMUST00000142121|ens|ENSMUST00000137122|ens|ENSMUST00000102580	unmapped		GO:0003674(molecular_function)|GO:0005575(cellular_component)|GO:0008150(biological_process)	GTACGGAGACAACAAAAACTCAAAGGACACAGACAACTTTGCCAAGACATACTCCAGTGA			0
A_55_P2054342	2810408I11Rik	RIKEN cDNA 2810408I11 gene	Mus musculus RIKEN cDNA 2810408I11 gene (2810408I11Rik), long non-coding RNA [NR_038009]	NR_038009	NR_038009	69941	chr1	64726521	64726462	-	5248	177	1	A_55_P2054342	FALSE	Mm.69044			ref|NR_038009|gb|AK013046|gb|CA464200|riken|2810408I11	chr1:64726521-64726462	mm|1qC2		CCCAAGAGATCCCCTGCTTTTAGCATTTTATGGCATACTTCTCTAAACTTTAATAAAATG			0
A_55_P2083789	2810410L24Rik	RIKEN cDNA 2810410L24 gene	Mus musculus RIKEN cDNA 2810410L24 gene (2810410L24Rik), long non-coding RNA [NR_030682]	NR_030682	NR_030682	100042332	chr11	120049863	120049804	-	39571	72	235	A_55_P2083789	FALSE	Mm.269766			ref|NR_030682|gb|AK013071|gb|AK162474|gb|AK164256	chr11:120049863-120049804	mm|11qE2	GO:0003674(molecular_function)|GO:0005575(cellular_component)|GO:0008150(biological_process)	GTAGAAACCCCTATGGAATGAAAAGTACTCCCAGTCTCTTTGAGGAAGATTGCAAAGTAA			0
A_55_P2017870	2810417H13Rik	RIKEN cDNA 2810417H13 gene	Mus musculus RIKEN cDNA 2810417H13 gene (2810417H13Rik), mRNA [NM_026515]	NM_026515	NM_026515	68026	chr9	65749748	65749807	+	10593	160	136	A_55_P2017870	FALSE	Mm.351273	ENSMUST00000045802		ref|NM_026515|ens|ENSMUST00000045802|ref|XM_011238092|ref|XM_011241956	chr9:065749748-065749807	mm|9qC	GO:0003682(chromatin binding)|GO:0005634(nucleus)|GO:0005737(cytoplasm)|GO:0006260(DNA replication)|GO:0006281(DNA repair)|GO:0006974(response to DNA damage stimulus)|GO:0009411(response to UV)|GO:0019985(translesion synthesis)|GO:0048471(perinuclear region of cytoplasm)|GO:0051297(centrosome organization)|GO:0051726(regulation of cell cycle)	GTTATGGCATGTTTGCTTTAAAAATTTGACTTAGGCTGGGTGTGGTGGCGCACGCCTTTA			0
A_66_P133404	2810417H13Rik	RIKEN cDNA 2810417H13 gene	Mus musculus RIKEN cDNA 2810417H13 gene (2810417H13Rik), mRNA [NM_026515]	NM_026515	NM_026515	68026	chr9	65750553	65750612	+	46303	51	220	A_66_P133404	FALSE	Mm.351273	ENSMUST00000045802		ref|NM_026515|ens|ENSMUST00000045802|gb|AK013105|tc|TC1574299	chr9:065750553-065750612	mm|9qC	GO:0003682(chromatin binding)|GO:0005634(nucleus)|GO:0005737(cytoplasm)|GO:0006260(DNA replication)|GO:0006281(DNA repair)|GO:0006974(response to DNA damage stimulus)|GO:0009411(response to UV)|GO:0019985(translesion synthesis)|GO:0048471(perinuclear region of cytoplasm)|GO:0051297(centrosome organization)|GO:0051726(regulation of cell cycle)	TATAGATATAGTAGTAACTGTTTTGAGATAGGATCTCATTATATAGCCTCTTAGGTGGCC			0
A_52_P502226	2810429I04Rik	RIKEN cDNA 2810429I04 gene	Mus musculus RIKEN cDNA 2810429I04 gene (2810429I04Rik), long non-coding RNA [NR_015522]	NR_015522	NR_015522	76937	chr13	3478802	3479195	+	61850	4	285	A_52_P502226	FALSE	Mm.487240			ref|NR_015522|gb|AK043092|gb|AK043278|tc|TC1676101	chr13:3478802-3479195	mm|13qA1	GO:0003674(molecular_function)|GO:0005575(cellular_component)|GO:0008150(biological_process)	AACTTTACTCCTTTGTATGTTTGAAGACATCATTTTCCAGTTTTGGAGCCGACTAATGAA			0
A_55_P2425938	2810468N07Rik	RIKEN cDNA 2810468N07 gene	Mus musculus RIKEN cDNA 2810468N07 gene (2810468N07Rik), long non-coding RNA [NR_045176]	NR_045176	NR_045176	72834	chr17	25711920	25711979	+	61474	5	54	A_55_P2425938	FALSE	Mm.33042			ref|NR_045176|gb|AK079380|riken|9630053J03|nap|NAP079183-1	chr17:25711920-25711979	mm|17qA3.3	GO:0003674(molecular_function)|GO:0005575(cellular_component)|GO:0008150(biological_process)	CCAGATACCTATAAGTGTCCAGGGCAAATTAAACACATCAATAAATGGCTTTCTTGTGTC			0
A_55_P2209053	2900001G08Rik	RIKEN cDNA 2900001G08 gene	Mus musculus adult male hippocampus cDNA, RIKEN full-length enriched library, clone:2900001G08 product:unclassifiable, full insert sequence. [AK013461]		AK013461	76950	chr17	31077590	31077649	+	21520	127	257	A_55_P2209053	FALSE	Mm.102196			gb|AK013461|tc|TC1617238|riken|2900001G08|nap|NAP091138-1	chr17:31077590-31077649	mm|17qA3.3		TGACATGCATGTCCCCCCTTCCACATACACATACCCACATAGTAAATAAATAAATGTAAT			0
A_51_P264656	2900011O08Rik	RIKEN cDNA 2900011O08 gene	Mus musculus RIKEN cDNA 2900011O08 gene (2900011O08Rik), mRNA [NM_144518]	NM_144518	NM_144518	67254	chr16	14100997	14101056	+	48486	45	117	A_51_P264656	FALSE	Mm.216217	ENSMUST00000056521		ref|NM_144518|ens|ENSMUST00000056521|ref|XM_006522482|gb|AK076136	chr16:014100997-014101056	mm|16qA1	GO:0005515(protein binding)|GO:0007026(negative regulation of microtubule depolymerization)|GO:0015630(microtubule cytoskeleton)|GO:0021822(negative regulation of cell motility involved in cerebral cortex radial glia guided migration)	ATGTGTGTTATGACTGGCCTAAGTACTTAGCACCAGTCAAGATTTGCTGATGTGCAAACT	89927	C16orf45	0
A_55_P2062314	2900041M22Rik	RIKEN cDNA 2900041M22 gene	Mus musculus RIKEN cDNA 2900041M22 gene (2900041M22Rik), long non-coding RNA [NR_015489]	NR_015489	NR_015489	78403	chr11	117473772	117473831	+	8294	167	142	A_55_P2062314	FALSE	Mm.212543			ref|NR_015489|gb|AK019332|gb|AK046435|tc|TC1609763	chr11:117473772-117473831	mm|11qE2	GO:0003674(molecular_function)|GO:0005575(cellular_component)|GO:0008150(biological_process)	TTACCTGGGGTTGGCCGGTCTGCATAGTGTGGAGTCAGCACCAGCTGAGGATGTACACAT			0
A_52_P67212	2900052N01Rik	RIKEN cDNA 2900052N01 gene	Mus musculus RIKEN cDNA 2900052N01 gene (2900052N01Rik), long non-coding RNA [NR_015605]	NR_015605	NR_015605	73040	chr9	46721808	46728651	+	47238	48	318	A_52_P67212	FALSE	Mm.265384			ref|NR_015605|gb|AK049847|gb|AK013669|gb|AK140089	chr9:46721808-46728651	mm|9qA5.3		AAAGGAAGGAGGCTCCATGGAGATGCAATGTGATTAGCTGGCCTTCTGCTCTGACCACCG			0
A_51_P471273	2900055J20Rik	RIKEN cDNA 2900055J20 gene	Mus musculus RIKEN cDNA 2900055J20 gene (2900055J20Rik), long non-coding RNA [NR_045177]	NR_045177	NR_045177	73001	chr18	40417085	40417144	+	37698	78	45	A_51_P471273	FALSE	Mm.428647	ENSMUST00000096572		ref|NR_045177|ens|ENSMUST00000096572|gb|AK013700|tc|TC1590186	chr18:40417085-40417144	mm|18qB3	GO:0003674(molecular_function)|GO:0005575(cellular_component)|GO:0008150(biological_process)	CATACACACATAGAAACGTACACCTACTAGAGCTTAAGTGTGGAATCATTGTTTTCCGAG			0
A_55_P2089113	2900073C17Rik	RIKEN cDNA 2900073C17 gene	Mus musculus adult male hippocampus cDNA, RIKEN full-length enriched library, clone:2900073C17 product:unclassifiable, full insert sequence. [AK013771]		AK013771	73020	chr8	49927408	49927349	-	52343	33	275	A_55_P2089113	FALSE				gb|AK013771|tc|TC1741617|riken|2900073C17|nap|NAP091561-1	chr8:049927408-049927349	mm|8qB1.2	GO:0003674(molecular_function)|GO:0005575(cellular_component)|GO:0008150(biological_process)	AATATGTGGAGCCATTACCTTGCTCTTCCGTTGTCAGATGAAAAGAAATGAGAAGAAAAG			0
A_52_P456243	2900079G21Rik	RIKEN cDNA 2900079G21 gene	Mus musculus RIKEN cDNA 2900079G21 gene (2900079G21Rik), transcript variant 2, long non-coding RNA [NR_033431]	NR_033431	NR_033431	620760	chr9	112138164	112138223	+	35713	84	79	A_52_P456243	FALSE	Mm.259863			ref|NR_033431|ref|NR_015468|gb|AK013806|gb|BC056188	chr9:112138164-112138223	mm|9qF3	GO:0003674(molecular_function)|GO:0005575(cellular_component)|GO:0008150(biological_process)	TACCACCTCGAGTCCTAGGGATGTTTGGCCAGAGCTTCTGGGTTTCTGGTACTCCGTGCT			0
A_55_P2319478	2900092D14Rik	RIKEN cDNA 2900092D14 gene	Mus musculus RIKEN cDNA 2900092D14 gene (2900092D14Rik), long non-coding RNA [NR_027891]	NR_027891	NR_027891	73100	chr1	42759957	42760016	+	58977	13	127	A_55_P2319478	FALSE	Mm.467885	ENSMUST00000054883		ref|NR_027891|ens|ENSMUST00000054883|gb|AK038597|riken|A230049B01	chr1:42759957-42760016	mm|1qB		AGTTTAGTTTGCCCAAGTTCCAGGGTAATTAATCAACTGTAAAATAAATGCAACAGGTAC			0
A_55_P2197777	3110001N23Rik	RIKEN cDNA 3110001N23 gene	Mus musculus 13 days embryo head cDNA, RIKEN full-length enriched library, clone:3110001N23 product:unclassifiable, full insert sequence. [AK013968]		AK013968	76918	chr5	132000880	132000821	-	59877	10	295	A_55_P2197777	FALSE				gb|AK013968|riken|3110001N23	chr5:132000880-132000821	mm|5qG2		AAGAGTCAGAGCACTCTTGCCCGGAATTTATTTAGCAAACAGAATTGGGCTTGATGACTC			0
A_55_P2017561	3110007F17Rik	RIKEN cDNA 3110007F17 gene	Mus musculus RIKEN cDNA 3110007F17 gene (3110007F17Rik), mRNA [NM_028426]	NM_028426	NM_028426	73061	chrX	120256770	120256829	+	19768	132	154	A_55_P2017561	FALSE	Mm.292979	ENSMUST00000121069		ref|NM_028426|ens|ENSMUST00000121069|ens|ENSMUST00000169445|ens|ENSMUST00000178148	chrX:122736612-122736553	mm|XqE3	GO:0003674(molecular_function)|GO:0005575(cellular_component)|GO:0008150(biological_process)	GCAGAGCCATGGGATTGGCATACATATCTGCCATATTGTTTTTATTAAGTGCTATAATTT	100288814	CLDN34	0
A_52_P400355	3110035E14Rik	RIKEN cDNA 3110035E14 gene	Mus musculus RIKEN cDNA 3110035E14 gene (3110035E14Rik), mRNA [NM_178399]	NM_178399	NM_178399	76982	chr1	9616976	9617035	+	41795	65	52	A_52_P400355	FALSE	Mm.491098	ENSMUST00000088666		ref|NM_178399|ens|ENSMUST00000088666|gb|AK043576|gb|AK043759	chr1:009616976-009617035	mm|1qA2	GO:0003674(molecular_function)|GO:0005575(cellular_component)|GO:0008150(biological_process)	CCAGAACAAAGTTAGGGATAAAACATGTCACAGAGTCTCCAACGATTGAATTTATTTAAC	254778	C8orf46	0
A_52_P674331	3222401L13Rik	RIKEN cDNA 3222401L13 gene	Mus musculus 15 days embryo head cDNA, RIKEN full-length enriched library, clone:D930022P05 product:unclassifiable, full insert sequence. [AK086343]		AK086343	320513	chr18	37818019	37818078	+	59270	12	197	A_52_P674331	FALSE	Mm.353627			gb|AK086343|gb|AK045900|gb|AK028276|tc|TC1597501	chr18:37818019-37818078	mm|18qB3	GO:0003674(molecular_function)|GO:0005575(cellular_component)|GO:0008150(biological_process)	ATGCATTAATTTGCATTAACATGTTCTGAAAACGCTTGTCCTTACAATAATGAAGGGGGG			0
A_66_P107129	3300005D01Rik	RIKEN cDNA 3300005D01 gene	Mus musculus RIKEN cDNA 3300005D01 gene (3300005D01Rik), transcript variant 2, long non-coding RNA [NR_045080]	NR_045080	NR_045080	78512	chr17	5803166	5803225	+	41085	67	160	A_66_P107129	FALSE	Mm.23696			ref|NR_045080|ref|NR_045081|ref|NR_045079|gb|AK077272	chr17:5803166-5803225	mm|17qA1		ATAATCAGGAAGGGGTTTGAGATAGCTGCCTTGTGTTTCCAGGCCAGTCCATCTCAAAAT			0
A_55_P2169829	3632451O06Rik	RIKEN cDNA 3632451O06 gene	Mus musculus RIKEN cDNA 3632451O06 gene (3632451O06Rik), mRNA [NM_026142]	NM_026142	NM_026142	67419	chr14	50301767	50301708	-	24296	118	282	A_55_P2169829	FALSE	Mm.318710	ENSMUST00000036972		ref|NM_026142|ens|ENSMUST00000036972|ref|XM_006519450|gb|AK032093	chr14:050301767-050301708	mm|14qC1	GO:0003674(molecular_function)|GO:0005575(cellular_component)|GO:0008150(biological_process)|GO:0016020(membrane)|GO:0016021(integral to membrane)	GGCTGCAATTTAGAAACTCATAGGATACATGTTCAGTGGGAGATAGGTAGAATAAATATT	145407	C14orf37	0
A_55_P2372528	4122401K19Rik	RIKEN cDNA 4122401K19 gene	Mus musculus 16 days embryo head cDNA, RIKEN full-length enriched library, clone:4122401K19 product:unclassifiable, full insert sequence. [AK014465]		AK014465	100306953	chr19	12672668	12672727	+	1260	189	105	A_55_P2372528	FALSE	Mm.291447			gb|AK014465|gb|AK029213|tc|TC1598232|riken|4122401K19	chr19:12672668-12672727	mm|19qA		GTGAGAAAGGTGAGGTGATTCAACAAAATAAATTTTGTCTGAAACTGGCACAATAAAACC			0
A_66_P130759	4631405J19Rik	RIKEN cDNA 4631405J19 gene	Mus musculus RIKEN cDNA 4631405J19 gene (4631405J19Rik), long non-coding RNA [NR_110333]	NR_110333	NR_110333	433456	chr2	92873506	92873565	+	14849	147	152	A_66_P130759	FALSE	Mm.235231			ref|NR_110333|gb|AK028444|gb|BC100298|gb|XR_168802	chr2:92873506-92873565	mm|2qE1	GO:0003674(molecular_function)|GO:0005575(cellular_component)|GO:0008150(biological_process)	ATAACCCAGCAAGAGCAACTCCAGAGAGGCCCAAGGAAGTTCTGGAATAAAATCATAGCT			0
A_51_P372992	4632428N05Rik	RIKEN cDNA 4632428N05 gene	Mus musculus RIKEN cDNA 4632428N05 gene (4632428N05Rik), transcript variant 1, mRNA [NM_028732]	NM_028732	NM_028732	74048	chr10	59834799	59834858	+	34475	87	260	A_51_P372992	FALSE	Mm.273584	ENSMUST00000020301		ref|NM_028732|ref|NM_001159572|ens|ENSMUST00000020301|gb|AK014600	chr10:059834799-059834858	mm|10qB4	GO:0002725(negative regulation of T cell cytokine production)|GO:0005515(protein binding)|GO:0005886(plasma membrane)|GO:0009897(external side of plasma membrane)|GO:0016020(membrane)|GO:0016021(integral to membrane)|GO:0030509(BMP signaling pathway)|GO:0030513(positive regulation of BMP signaling pathway)|GO:0048863(stem cell differentiation)|GO:2000562(negative regulation of CD4-positive, alpha…	GATTCCACTCTGGGGATCTAGCTTTGTCTGGGCCAGTGAAGATCTCTATAATGGCATTAT	64115	C10orf54	0
A_55_P2115136	4632428N05Rik	RIKEN cDNA 4632428N05 gene	Mus musculus RIKEN cDNA 4632428N05 gene (4632428N05Rik), transcript variant 1, mRNA [NM_028732]	NM_028732	NM_028732	74048	chr10	59831980	59832039	+	23989	119	240	A_55_P2115136	FALSE	Mm.273584	ENSMUST00000020301		ref|NM_028732|ref|NM_001159572|ens|ENSMUST00000020301|ref|XR_380449	chr10:059831980-059832039	mm|10qB4	GO:0002725(negative regulation of T cell cytokine production)|GO:0005515(protein binding)|GO:0005886(plasma membrane)|GO:0009897(external side of plasma membrane)|GO:0016020(membrane)|GO:0016021(integral to membrane)|GO:0030509(BMP signaling pathway)|GO:0030513(positive regulation of BMP signaling pathway)|GO:0048863(stem cell differentiation)|GO:2000562(negative regulation of CD4-positive, alpha…	ATGAACGTCCGGCTTGGCAAGAGCCTTTCTTCATGGAAACCAGTAGCCCGGAGGGGATGA	64115	C10orf54	0
A_51_P423869	4632433K11Rik	RIKEN cDNA 4632433K11 gene	Mus musculus 0 day neonate skin cDNA, RIKEN full-length enriched library, clone:4632433K11 product:hypothetical protein, full insert sequence. [AK014606]		AK014606	77043	chr7	4988085	4988144	+	24790	117	277	A_51_P423869	FALSE	Mm.333548			gb|AK014606|gb|CJ239426|riken|4632433K11|nap|NAP010773-001	chr7:4988085-4988144	mm|7qA1	GO:0003674(molecular_function)|GO:0005575(cellular_component)|GO:0008150(biological_process)	GAGAGCAGAAGAAAAAACAGGAGGCTGTGGACCTGCTTGGAGAGAGTCTTCATTCAATAA			0
A_55_P2388040	4731419I09Rik	RIKEN cDNA 4731419I09 gene	Mus musculus 10 days neonate skin cDNA, RIKEN full-length enriched library, clone:4731419I09 product:hypothetical protein, full insert sequence. [AK132440]		AK132440	100048897	chr3	89151692	89151751	+	2624	185	1	A_55_P2388040	FALSE	Mm.470104			gb|AK132440|riken|4731419I09	chr3:89151692-89151751	mm|3qF1	GO:0003674(molecular_function)|GO:0005575(cellular_component)|GO:0008150(biological_process)	TATAGGATTGTTGTTAAGGAGTCCGTGAGTGTAGTTCTCAGTGCATAATAAAGGTTATGT			0
A_55_P2210213	4732423E21Rik	RIKEN cDNA 4732423E21 gene	Mus musculus 10 days neonate skin cDNA, RIKEN full-length enriched library, clone:4732423E21 product:unclassifiable, full insert sequence. [AK028644]		AK028644	106967	chr18	69730353	69730412	+	45292	54	274	A_55_P2210213	FALSE	Mm.444419			gb|AK028644|gb|AK135121|gb|AK078281|gb|AV237721	chr18:69730353-69730412	mm|18qE2		TGGGAGCCATTTCCTTCTAGCTATTAAAAGTTCACAGACTGAGCAGTGCTTAGATTTTAA			0
A_55_P2080931	4732456N10Rik	RIKEN cDNA 4732456N10 gene	Mus musculus RIKEN cDNA 4732456N10 gene (4732456N10Rik), mRNA [NM_177717]	NM_177717	NM_177717	239673	chr15	101382976	101382917	-	59470	11	126	A_55_P2080931	FALSE	Mm.461267	ENSMUST00000023714		ref|NM_177717|ens|ENSMUST00000023714|gb|AK028791|tc|TC1594299	chr15:101382976-101382917	mm|15qF2	GO:0003674(molecular_function)|GO:0005575(cellular_component)|GO:0008150(biological_process)	TGAGTCCTCAAATACCTGCTACGAGTTCAAGAACAAAGTACTTCCCAAAGGCAGTTGGTC			0
A_55_P2419483	4732460I02Rik	RIKEN cDNA 4732460I02 gene	Mus musculus 12 days embryo eyeball cDNA, RIKEN full-length enriched library, clone:D230007J06 product:unclassifiable, full insert sequence. [AK084197]		AK084197	320929	chrX	54630198	54630139	-	6695	172	60	A_55_P2419483	FALSE	Mm.183114			gb|AK084197|tc|TC1598095|riken|D230007J06|nap|NAP100807-001	chrX:54630198-54630139	mm|XqA5		CATCTATTCCAAAACTCATATTAGATTTTGAAGATGGTCATGCAGCTTTGTAAACTTGCC			0
A_55_P2142181	4732471J01Rik	RIKEN cDNA 4732471J01 gene	Mus musculus RIKEN cDNA 4732471J01 gene (4732471J01Rik), transcript variant 3, long non-coding RNA [NR_073028]	NR_073028	NR_073028	654804	chr7	26170696	26170753	+	21805	126	16	A_55_P2142181	FALSE	Mm.389841			ref|NR_073028|gb|AK078204|tc|TC1593796|riken|6430504C03	chr7:26170696-26170753	mm|7qA3	GO:0003674(molecular_function)|GO:0005575(cellular_component)|GO:0008150(biological_process)	ATGGACCTAGTGTCCTCAAAAGGAAGGAGACGATGAACAAAATAAAGACATGTCTGAATC			0
A_52_P685511	4833405L11Rik	RIKEN cDNA 4833405L11 gene	Mus musculus 0 day neonate head cDNA, RIKEN full-length enriched library, clone:4833405L11 product:unclassifiable, full insert sequence. [AK014656]		AK014656	76862	chr12	29791057	29790998	-	57921	16	271	A_52_P685511	FALSE	Mm.410568			gb|AK014656|tc|TC1639023|tc|TC1603515|riken|4833405L11	chr12:29791057-29790998	mm|12qA2	GO:0003674(molecular_function)|GO:0005575(cellular_component)|GO:0008150(biological_process)	CCCATTCCTTAGAATAGGTTTTGTCTTCCCAAACAGTAATCATGCATTCCTACCTGACCA			0
A_55_P2360266	4833411C07Rik	RIKEN cDNA 4833411C07 gene	Mus musculus RIKEN cDNA 4833411C07 gene, mRNA (cDNA clone IMAGE:3465514). [BC052524]		BC052524	71624	chr8	10903704	10903763	+	11613	157	64	A_55_P2360266	FALSE	Mm.139075			gb|BC052524|tc|TC1628553	chr8:10903704-10903763	mm|8qA1.1		AAGAATGACAGGCAAAGGAGCCACTGAGTAGATGTGAACGCCTTTAATTCCTGTACTGAG			0
A_55_P2208961	4833419E13Rik	RIKEN cDNA 4833419E13 gene	Mus musculus 0 day neonate head cDNA, RIKEN full-length enriched library, clone:4833419E13 product:inferred: RIKEN cDNA 4833419E13 gene, full insert sequence. [AK014724]		AK014724	74579	chr11	51452451	51452392	-	32661	93	279	A_55_P2208961	FALSE	Mm.55347			gb|AK014724|gb|AV249851|riken|4833419E13|nap|NAP073862-1	chr11:51452451-51452392	mm|11qB1.3		AATATGGCGCAAAGTAAGCCACCATTTGCACTACCTTGTAAAATAAAATAAGCATCAACG			0
A_55_P2218483	4922502B01Rik	RIKEN cDNA 4922502B01 gene	Mus musculus 7 days neonate cerebellum cDNA, RIKEN full-length enriched library, clone:A730093L10 product:unclassifiable, full insert sequence. [AK043413]		AK043413	70954	chr8	111709475	111709534	+	36079	83	3	A_55_P2218483	FALSE	Mm.203332			gb|AK043413|tc|TC1625045|riken|A730093L10	chr8:111709475-111709534	mm|8qD3	GO:0003674(molecular_function)|GO:0005575(cellular_component)|GO:0008150(biological_process)	AAGCTTCTCCTTGTCTGACTGTAGCAGTAATTTGGAGTTAATTTGTGTGGCTTCCGCAGT			0
A_55_P2399878	4930402F11Rik	RIKEN cDNA 4930402F11 gene	Mus musculus RIKEN cDNA 4930402F11 gene (4930402F11Rik), long non-coding RNA [NR_045940]	NR_045940	NR_045940	73796	chr7	76644513	76644572	+	27824	108	113	A_55_P2399878	FALSE	Mm.410832			ref|NR_045940|gb|AK015048|tc|NP742618|riken|4930402F11	chr7:76644513-76644572	mm|7qD1		CTCTCTGGGCCTTTTGAACTTATATTGCATTCATAGAATAAACACAAGCTGTTATGACAT			0
A_55_P2381921	4930406D14Rik	RIKEN cDNA 4930406D14 gene	Mus musculus 15 days embryo head cDNA, RIKEN full-length enriched library, clone:D930020P16 product:unclassifiable, full insert sequence. [AK086320]		AK086320	73805	chr11	86765800	86765859	+	46459	51	235	A_55_P2381921	FALSE	Mm.440862			gb|AK086320|riken|D930020P16|nap|NAP124962-1	chr11:86765800-86765859	mm|11qC		TTACCCAAAACTTTCACATAGGGATTGGTGTGAGCCTGGCACAATGGTGTGCCTTGTAAT			0
A_55_P2196185	4930412C18Rik	RIKEN cDNA 4930412C18 gene	Mus musculus RIKEN cDNA 4930412C18 gene (4930412C18Rik), long non-coding RNA [NR_030693]	NR_030693	NR_030693	320152	chr4	9750472	9750531	+	24041	119	136	A_55_P2196185	FALSE	Mm.487113			ref|NR_030693|gb|AK076677|tc|TC1614291|riken|4930412C18	chr4:9750472-9750531	mm|4qA1	GO:0003674(molecular_function)|GO:0005575(cellular_component)|GO:0008150(biological_process)	CCACCAGGAGACTTTCGTCATTCTCTTGTTTTATCCCCAACAATTCATAACTCTTGTTTT			0
A_55_P2319730	4930414F18Rik	RIKEN cDNA 4930414F18 gene	Mus musculus adult male testis cDNA, RIKEN full-length enriched library, clone:4930414F18 product:unclassifiable, full insert sequence. [AK019576]		AK019576	78790	chr16	12629268	12629209	-	24112	119	321	A_55_P2319730	FALSE	Mm.325880			gb|AK019576|tc|TC1621540|riken|4930414F18|nap|NAP021780-001	chr16:12629268-12629209	mm|16qA1	GO:0003674(molecular_function)|GO:0005575(cellular_component)|GO:0008150(biological_process)	GCTGGAGGGGAGAGAAGAGAATGAAAGTGACCTAATTCAACTCAATTAAAATCATTTTTA			0
A_55_P2198983	4930415C11Rik	RIKEN cDNA 4930415C11 gene	mr62b05.y1 Stratagene mouse testis (#937308) Mus musculus cDNA clone IMAGE:602001 5' similar to gb:J03952 Mouse, glutathione transferase GT8.7 mRNA, complete cds (MOUSE);. [AI606402]		AI606402	73880	chr13	59185011	59184952	-	35996	83	169	A_55_P2198983	FALSE	Mm.417824			gb|AI606402	unmapped			CATGTGCAGGCCTCAAGAGACTCTGCTACATGAAGAGTACCGCTCATCGCACACCTATAT			0
A_51_P282993	4930415F15Rik	RIKEN cDNA 4930415F15 gene	Mus musculus RIKEN cDNA 4930415F15 gene (4930415F15Rik), mRNA [NM_028669]	NM_028669	NM_028669	73862	chr11	11415024	11415083	+	42658	62	294	A_51_P282993	FALSE	Mm.159077			ref|NM_028669|ref|XM_006514821|ref|XM_006514822|ref|XM_006514823	chr11:011415024-011415083	mm|11qA1	GO:0003674(molecular_function)|GO:0005575(cellular_component)|GO:0008150(biological_process)	GCCCAATGTCCCAAATGGTGACAACTGTGAAGCCCTACAACCCTTTTAACAAGAAGGAAA	100130988	C7orf72	0
A_55_P2383248	4930422N03Rik	RIKEN cDNA 4930422N03 gene	Mus musculus adult male testis cDNA, RIKEN full-length enriched library, clone:4930422N03 product:unclassifiable, full insert sequence. [AK015184]		AK015184	76871	chrX	155999834	155999893	+	30596	99	146	A_55_P2383248	FALSE	Mm.460743			gb|AK015184|tc|TC1658457|riken|4930422N03	chrX:155999834-155999893	mm|XqF4		TCAGTTGATGGACTTTTGGTTGTTTCCACTTTTTGGTTATTGTGAATAAATAGTGCTGTG			0
A_55_P2108773	4930427A07Rik	RIKEN cDNA 4930427A07 gene	Mus musculus RIKEN cDNA 4930427A07 gene (4930427A07Rik), mRNA [NM_134041]	NM_134041	NM_134041	104732	chr12	114403609	114403668	+	8509	167	39	A_55_P2108773	FALSE	Mm.87616	ENSMUST00000049271		ref|NM_134041|ens|ENSMUST00000049271|gb|BC037752|gb|AK220305	chr12:114403609-114403668	mm|12qF1	GO:0003674(molecular_function)|GO:0005575(cellular_component)|GO:0008150(biological_process)	GTCAAAACTAGAAACTTCTGTTTAAAAGTCGACATTAATAAGATGTGTCTCAATGGCGGA	283643	C14orf80	0
A_55_P2063336	4930427A07Rik	RIKEN cDNA 4930427A07 gene	Mus musculus RIKEN cDNA 4930427A07 gene (4930427A07Rik), mRNA [NM_134041]	NM_134041	NM_134041	104732	chr12	114403580	114403639	+	8935	165	172	A_55_P2063336	FALSE	Mm.87616	ENSMUST00000049271		ref|NM_134041|ens|ENSMUST00000049271|gb|AK167092|gb|BC051497	chr12:114403580-114403639	mm|12qF1	GO:0003674(molecular_function)|GO:0005575(cellular_component)|GO:0008150(biological_process)	GGAAGGGAAGTTTAGTAATTCCAACTCTTGTCAAAACTAGAAACTTCTGTTTAAAAGTCG	283643	C14orf80	0
A_55_P2262593	4930429F24Rik	RIKEN cDNA 4930429F24 gene	Mus musculus 13 days embryo lung cDNA, RIKEN full-length enriched library, clone:D430033I02 product:unclassifiable, full insert sequence. [AK142388]		AK142388	74633	chr9	79649179	79649120	-	3020	183	194	A_55_P2262593	FALSE	Mm.262175			gb|AK142388|gb|BB485797|riken|D430033I02	chr9:79649179-79649120	mm|9qE1		GTGTAATGCCCTCTTTTCAGCTCTTTATAAGTGATTACATTACAGTTAAGACATTCTCTG			0
A_55_P2236577	4930444M15Rik	RIKEN cDNA 4930444M15 gene	Mus musculus RIKEN cDNA 4930444M15 gene (4930444M15Rik), long non-coding RNA [NR_045660]	NR_045660	NR_045660	75789	chr14	76914424	76914365	-	23758	120	46	A_55_P2236577	FALSE	Mm.159571			ref|NR_045660|gb|AK015383|tc|TC1728906|riken|4930444M15	chr14:76914424-76914365	mm|14qD3	GO:0003674(molecular_function)|GO:0005575(cellular_component)|GO:0008150(biological_process)	TTGAAACCTGCTCCTAGACCTTGTTATTTAGTCTGTTAATAAACAAGGATTCCTAGAACC			0
A_52_P420369	4930447C04Rik	RIKEN cDNA 4930447C04 gene	Mus musculus RIKEN cDNA 4930447C04 gene (4930447C04Rik), mRNA [NM_029444]	NM_029444	NM_029444	75801	chr12	73990803	73990744	-	24416	118	42	A_52_P420369	FALSE	Mm.242892	ENSMUST00000044000		ref|NM_029444|ens|ENSMUST00000044000|ens|ENSMUST00000110489|ref|XM_011244199	chr12:073990803-073990744	mm|12qC3	GO:0003674(molecular_function)|GO:0005575(cellular_component)|GO:0007275(multicellular organismal development)|GO:0051090(regulation of sequence-specific DNA binding transcription factor activity)	ACAAAAGGATTCTCCTGGATTTTCATTTCTTATGAGTTACACCTCTAGATCACCTGGACT	317761	C14orf39	0
A_55_P2200661	4930447I22Rik	RIKEN cDNA 4930447I22 gene	Mus musculus adult male testis cDNA, RIKEN full-length enriched library, clone:4930447I22 product:unclassifiable, full insert sequence. [AK015406]		AK015406	112413	chr8	87187227	87187168	-	40824	68	26	A_55_P2200661	FALSE	Mm.160301			gb|AK015406|gb|BB041411|tc|NP742387|riken|4930447I22	chr8:087187227-087187168	mm|8qC3		CTGTATCTTCTATGGAGTGGAGGTGAGAGATCAGAGACATTGAATAAAAAGAGAAAGTCC			0
A_55_P2023012	4930449I24Rik	RIKEN cDNA 4930449I24 gene	Mus musculus RIKEN cDNA 4930449I24 gene (4930449I24Rik), mRNA [NM_026136]	NM_026136	NM_026136	67410	chr5	147316609	147316668	+	43064	61	138	A_55_P2023012	FALSE	Mm.463005			ref|NM_026136|ref|NM_001243104|ref|NM_001243114|ref|NM_001243111	chr5:147316609-147316668	mm|5qG3	GO:0003674(molecular_function)|GO:0005575(cellular_component)|GO:0008150(biological_process)	CAGCTGAGGTTCCCCACCTAAGCTTATCTCATATTTTTAGAGAAAATAACTTATAGCTTT			0
A_55_P2003828	4930451G09Rik	RIKEN cDNA 4930451G09 gene	Mus musculus RIKEN cDNA 4930451G09 gene (4930451G09Rik), non-coding RNA [NR_073370]	NR_073370	NR_073370	74684	chr16	4978996	4979055	+	2473	185	303	A_55_P2003828	FALSE	Mm.374835	ENSMUST00000090457		ref|NR_073370|ens|ENSMUST00000090457|gb|AK154225|gb|AK078576	chr16:4978996-4979055	mm|16qA1	GO:0003674(molecular_function)|GO:0005575(cellular_component)|GO:0008150(biological_process)	TGTCAGAAAGCTTGCTGAGAATGACTCACAGTGACAGAAAATAAACTCTACTGCAGTTTC			0
A_55_P2204168	4930452G13Rik	RIKEN cDNA 4930452G13 gene	Mus musculus RIKEN cDNA 4930452G13 gene (4930452G13Rik), long non-coding RNA [NR_045060]	NR_045060	NR_045060	73989	chr14	80112652	80112711	+	9427	164	171	A_55_P2204168	FALSE	Mm.107775			ref|NR_045060|gb|AK015444|tc|TC1600744|riken|4930452G13	chr14:80112652-80112711	mm|14qD3		ATGTGACTACTCAGTATCCTATTTAAATCTTATAAATGCCCACTGAAGTAGGCATGGACT			0
A_55_P2214348	4930469K13Rik	RIKEN cDNA 4930469K13 gene	Mus musculus 16 days neonate thymus cDNA, RIKEN full-length enriched library, clone:A130005E13 product:unclassifiable, full insert sequence. [AK037310]		AK037310	76874	chr11	33968166	33968225	+	33987	89	251	A_55_P2214348	FALSE	Mm.437529			gb|AK037310|tc|TC1614206|riken|A130005E13	chr11:33968166-33968225	mm|11qA4		TATAGGTCAGCACATGACAGAGGCTTCATGGGAGCAAGAGATGTGATTGGTATTGAGTCA			0
A_55_P2275512	4930470G03Rik	RIKEN cDNA 4930470G03 gene	Mus musculus adult male diencephalon cDNA, RIKEN full-length enriched library, clone:9330178L02 product:unclassifiable, full insert sequence. [AK034331]		AK034331	100190798	chr13	21537741	21537800	+	37699	78	43	A_55_P2275512	FALSE	Mm.488199			gb|AK034331|gb|BB082986|riken|9330178L02|nap|NAP117307-1	chr13:21537741-21537800	mm|13qA3.1	GO:0003674(molecular_function)|GO:0005575(cellular_component)|GO:0008150(biological_process)	GTGTTCAGGGAAAGGAATCTGCAAATAGCAGGAAATACTTAAATAAAGCCATGTGTATAA			0
A_55_P2286951	4930473O22Rik	RIKEN cDNA 4930473O22 gene	Mus musculus RIKEN cDNA 4930473O22 gene (4930473O22Rik), long non-coding RNA [NR_045356]	NR_045356	NR_045356	75025	chr10	97053705	97053646	-	42811	62	315	A_55_P2286951	FALSE	Mm.159401			ref|NR_045356|gb|AK015568|riken|4930473O22|nap|NAP074334-1	chr10:97053705-97053646	mm|10qC3		CTAAGTTTTCAGAACAAAGAAGAAGCCACTTAAACTCAGATTGTGAGGAGTGTCATTTAT			0
A_51_P276479	4930486L24Rik	RIKEN cDNA 4930486L24 gene	Mus musculus RIKEN cDNA 4930486L24 gene (4930486L24Rik), mRNA [NM_178098]	NM_178098	NM_178098	214639	chr13	60944319	60944260	-	52390	33	181	A_51_P276479	FALSE	Mm.19839	ENSMUST00000091569		ref|NM_178098|ens|ENSMUST00000091569|gb|AK145933|gb|AK015635	chr13:060944319-060944260	mm|13qB2	GO:0004197(cysteine-type endopeptidase activity)|GO:0005576(extracellular region)|GO:0005615(extracellular space)|GO:0005764(lysosome)|GO:0006508(proteolysis)|GO:0008234(cysteine-type peptidase activity)|GO:0030054(cell junction)|GO:0051603(proteolysis involved in cellular protein catabolic process)	CATGAAGGGATACATAAAGATTGCCAAAGACTGGAACAACCACTGCGGGATTGCTACACT			0
A_55_P1966377	4930502E18Rik	RIKEN cDNA 4930502E18 gene	Mus musculus RIKEN cDNA 4930502E18 gene (4930502E18Rik), mRNA [NM_029142]	NM_029142	NM_029142	75013	chrX	51041326	51041385	+	16844	141	98	A_55_P1966377	FALSE	Mm.336332	ENSMUST00000069209		ref|NM_029142|ens|ENSMUST00000069209|ref|XM_006535359|gb|BC115663	chrX:051041326-051041385	mm|XqA5	GO:0003674(molecular_function)|GO:0005575(cellular_component)|GO:0008150(biological_process)	TTCCAAGGTCAGGAATCCTGCTAGTGGCTTTGTTTATTGATTGAGAGACATGCAGAGGGA			0
A_51_P285856	4930503E14Rik	RIKEN cDNA 4930503E14 gene	Mus musculus RIKEN cDNA 4930503E14 gene (4930503E14Rik), mRNA [NM_029131]	NM_029131	NM_029131	74954	chr14	44741156	44741097	-	22383	124	172	A_51_P285856	FALSE	Mm.425904			ref|NM_029131|ref|XM_006519637|ref|XM_006519638|gb|AK015686	chr14:044741156-044741097	mm|14qC1	GO:0003674(molecular_function)|GO:0005575(cellular_component)|GO:0008150(biological_process)	TCTACTGTGTTGCCAAGGGCACTCATTGGCTGTAAGTCTTTGCTATAAAATAACAGCAAA			0
A_52_P100185	4930503L19Rik	RIKEN cDNA 4930503L19 gene	Mus musculus RIKEN cDNA 4930503L19 gene (4930503L19Rik), mRNA [NM_172967]	NM_172967	NM_172967	269033	chr18	70612910	70612851	-	20070	131	206	A_52_P100185	FALSE	Mm.87470	ENSMUST00000067556		ref|NM_172967|ens|ENSMUST00000067556|ref|XM_006525964|ref|XM_006525965	chr18:070612910-070612851	mm|18qE2	GO:0005576(extracellular region)	TGCTGTTACTTACACCGAGAAGGTGAACATTAGCCATACGTTATTCTGTGGCCAGTTCAA	162681	C18orf54	0
A_51_P200561	4930506M07Rik	RIKEN cDNA 4930506M07 gene	Mus musculus RIKEN cDNA 4930506M07 gene (4930506M07Rik), transcript variant 2, mRNA [NM_175172]	NM_175172	NM_175172	71653	chr19	59048100	59048041	-	44906	56	61	A_51_P200561	FALSE	Mm.37338	ENSMUST00000047511		ref|NM_175172|ref|NM_001114312|ens|ENSMUST00000047511|ens|ENSMUST00000163821	chr19:059048100-059048041	mm|19qD3	GO:0005515(protein binding)|GO:0005874(microtubule)|GO:0007275(multicellular organismal development)|GO:0007409(axonogenesis)|GO:0019900(kinase binding)|GO:0030426(growth cone)|GO:0042995(cell projection)|GO:0044295(axonal growth cone)|GO:0048812(neuron projection morphogenesis)|GO:0051899(membrane depolarization)|GO:2000114(regulation of establishment of cell polarity)|GO:2001222(regulation of n…	ACAATTCTCTTTCTGTAGGGTCAATGGGCTTGACTGTTTTCCCTGTCTGTCAGTGCTGAT	57698		0
A_55_P2415915	4930517J16Rik	RIKEN cDNA 4930517J16 gene	Mus musculus adult male testis cDNA, RIKEN full-length enriched library, clone:4930517J16 product:unclassifiable, full insert sequence. [AK015815]		AK015815	74722	chr4	44683668	44683727	+	24426	118	22	A_55_P2415915	FALSE	Mm.401029			gb|AK015815|tc|TC1606754|riken|4930517J16	chr4:44683668-44683727	mm|4qB1		GCCTCTCCTGCTAGATTTTCAGTTTAGAAAACAGCTTTTATCTCAACATGTGTTGTTTAT			0
A_55_P1978246	4930519F16Rik	RIKEN cDNA 4930519F16 gene	Mus musculus RIKEN cDNA 4930519F16 gene (4930519F16Rik), mRNA [NM_029170]	NM_029170	NM_029170	75106	chrX	100427679	100427620	-	26429	112	279	A_55_P1978246	FALSE	Mm.1441	ENSMUST00000133491		ref|NM_029170|ens|ENSMUST00000133491|gb|BC107248|gb|BC114984	chrX:100427679-100427620	mm|XqD		AATCTGAAGTGTGGAAATCCTGACTGAATTACTTCAGGATATGACCAGCCTTTCGTGCTG			0
A_55_P2287611	4930519N06Rik	RIKEN cDNA 4930519N06 gene	Mus musculus adult male testis cDNA, RIKEN full-length enriched library, clone:4930519N06 product:unclassifiable, full insert sequence. [AK015846]		AK015846	75082	chr11	33993103	33993044	-	12610	154	38	A_55_P2287611	FALSE	Mm.159420			gb|AK015846|gb|AV266694|tc|TC1613943|riken|4930519N06	chr11:33993103-33993044	mm|11qA4		TAAAACCCACTTGAGTTGACAGTCTTAACCATCGTAACTACCAATAAATGCTTTGAGATC			0
A_52_P227	4930520O04Rik	RIKEN cDNA 4930520O04 gene	Mus musculus RIKEN cDNA 4930520O04 gene (4930520O04Rik), transcript variant 1, long non-coding RNA [NR_040383]	NR_040383	NR_040383	75116	chr9	114285915	114285974	+	25553	115	63	A_52_P227	FALSE	Mm.72675			ref|NR_040383|ref|NR_040384|gb|AK015855|tc|TC1600415	chr9:114285915-114285974	mm|9qF3		ATGACAAAACACATCAAACAGACAAACAAAAGGGCTAAGGTTGGCTAAGGGAGATCGAGT			0
A_66_P109023	4930534H18Rik	RIKEN cDNA 4930534H18 gene	Mus musculus adult male testis cDNA, RIKEN full-length enriched library, clone:4930534H18 product:unclassifiable, full insert sequence. [AK019718]		AK019718	68174	chr16	90935811	90935870	+	22846	123	229	A_66_P109023	FALSE				gb|AK019718|tc|TC1628305|riken|4930534H18|nap|NAP013294-001	chr16:90935811-90935870	mm|16qC3.3	GO:0003674(molecular_function)|GO:0005575(cellular_component)|GO:0008150(biological_process)	GCCAATGGAAATTCCTGGAAAGAAGCTGTGTAATAAAAACAGCAGTGATGTGGAGAGGCT			0
A_55_P2041514	4930550L24Rik	RIKEN cDNA 4930550L24 gene	Mus musculus RIKEN cDNA 4930550L24 gene (4930550L24Rik), mRNA [NM_023774]	NM_023774	NM_023774	75352	chrX	56173405	56173464	+	1368	188	218	A_55_P2041514	FALSE	Mm.60906	ENSMUST00000062542		ref|NM_023774|ens|ENSMUST00000062542|gb|AK016090|gb|BC087920	chrX:056173405-056173464	mm|XqA6	GO:0003674(molecular_function)|GO:0008150(biological_process)	GGTGTGCACCTCACTTACTTGACTTAGTCAAGAATGCGTAAGAAATTAAAGCTTAATAAA			0
A_55_P2344244	4930556H04Rik	RIKEN cDNA 4930556H04 gene	Mus musculus adult male testis cDNA, RIKEN full-length enriched library, clone:4930556H04 product:unclassifiable, full insert sequence. [AK016144]		AK016144	75842	chr12	100809499	100809558	+	27867	108	27	A_55_P2344244	FALSE	Mm.376311			gb|AK016144|riken|4930556H04|nap|NAP074632-1	chr12:100809499-100809558	mm|12qE		GGTGGGTAATAATAATCTTATTGTGAGCGCCTCAAAATTGGTAATGATACCCACATTTTT			0
A_55_P2315747	4930571B16Rik	RIKEN cDNA 4930571B16 gene	Mus musculus adult male testis cDNA, RIKEN full-length enriched library, clone:4930571B16 product:SAM domain, SH3 domain and nuclear localisation signals, 1, full insert sequence. [AK016268]		AK016268	613117	chr17	55702746	55702805	+	57603	17	251	A_55_P2315747	FALSE	Mm.488109			gb|AK016268|gb|BB017853|riken|4930571B16|nap|NAP074692-1	chr17:55702746-55702805	mm|17qC		TGCTAGAAAGAGAGGTTGGAGTGTTAAGGAACCCTAATAAAAGTAGGTTTCCAAAGATCT			0
A_55_P2233368	4930572J10Rik	RIKEN cDNA 4930572J10 gene	Mus musculus adult male testis cDNA, RIKEN full-length enriched library, clone:4930572J10 product:unclassifiable, full insert sequence. [AK016280]		AK016280	75884	chr18	43198278	43198219	-	19662	133	37	A_55_P2233368	FALSE	Mm.488108			gb|AK016280|gb|BB018125|riken|4930572J10	chr18:43198278-43198219	mm|18qB3		AGGTTCCTGCACTGATGTCCCTGGAAGATGGTCTACCAGCTGTAAAATGAAATAAACCAT			0
A_55_P2079390	4930579G24Rik	RIKEN cDNA 4930579G24 gene	Mus musculus RIKEN cDNA 4930579G24 gene (4930579G24Rik), mRNA [NM_029482]	NM_029482	NM_029482	75939	chr3	79436621	79436680	+	24398	118	78	A_55_P2079390	FALSE	Mm.221520			ref|NM_029482|gb|BC096378|gb|BC052483|gb|AK137776	chr3:079436621-079436680	mm|3qE3	GO:0003674(molecular_function)|GO:0005575(cellular_component)|GO:0008150(biological_process)	GCTCACACAACACATATAGTGTGATTTCTATACCAAAGGATGCTTATTTCTGTATAAGAG	201725	C4orf46	0
A_51_P185292	4930581F22Rik	RIKEN cDNA 4930581F22 gene	Mus musculus RIKEN cDNA 4930581F22 gene (4930581F22Rik), long non-coding RNA [NR_029475]	NR_029475	NR_029475	78934	chr9	34938381	34938440	+	15594	145	301	A_51_P185292	FALSE	Mm.391688			ref|NR_029475|gb|AK019824|tc|TC1592429|riken|4930581F22	chr9:34938381-34938440	mm|9qA4	GO:0003674(molecular_function)|GO:0005575(cellular_component)|GO:0008150(biological_process)	AGAAAACAGCAGTAAATGACCTTATGGGTGTGACTTTTCGAGAAGAAAAAGGGGAGGTCT			0
A_55_P2299374	4930588A03Rik	RIKEN cDNA 4930588A03 gene	Mus musculus adult male corpora quadrigemina cDNA, RIKEN full-length enriched library, clone:B230363O11 product:unclassifiable, full insert sequence. [AK046275]		AK046275	75868	chr18	43096592	43096533	-	8986	165	70	A_55_P2299374	FALSE	Mm.445952			gb|AK046275|riken|B230363O11|nap|NAP083282-1	chr18:43096592-43096533	mm|18qB3		GAACAAAGGCTATAGCTAATACATTGTACCCTGTACCACCCACGAAAAACCAAAACCAAA			0
A_66_P100586	4930599N23Rik	RIKEN cDNA 4930599N23 gene	Mus musculus 3 days neonate thymus cDNA, RIKEN full-length enriched library, clone:A630054A15 product:Hypothetical arginine-rich region containing protein, full insert sequence. [AK042039]		AK042039	75379	chr6	39069696	39069755	+	39125	73	144	A_66_P100586	FALSE	Mm.348014			gb|AK042039|tc|TC1591056|riken|A630054A15|nap|NAP081835-1	chr6:39069696-39069755	mm|6qB1		ATGTAATAAAATGGGATTAGAGTAGACCAATTGGCAAACCCTGGAACCCAGTGAGAGATT			0
A_51_P305239	4931403M11Rik	RIKEN cDNA 4931403M11 gene	Mus musculus adult male testis cDNA, RIKEN full-length enriched library, clone:4931403M11 product:hypothetical protein, full insert sequence. [AK016429]		AK016429	70955	chr14	25440724	25440783	+	45736	53	42	A_51_P305239	FALSE	Mm.483193			gb|AK016429|tc|TC1593536|riken|4931403M11|nap|NAP012909-001	chr14:25440724-25440783	mm|14qA3	GO:0003674(molecular_function)|GO:0005575(cellular_component)|GO:0008150(biological_process)	GCTGGGGTCAGGAGTACCATGCTTGCTCTGATGGAACAGCACCAGCTACACAATACCCTG			0
A_55_P2415472	4931408D14Rik	RIKEN cDNA 4931408D14 gene	Mus musculus RIKEN cDNA 4931408D14 gene (4931408D14Rik), transcript variant 1, long non-coding RNA [NR_040298]	NR_040298	NR_040298	77059	chr19	37333005	37332946	-	59309	12	119	A_55_P2415472	FALSE	Mm.251476			ref|NR_040298|ref|NR_040299|gb|AK016444|riken|4931408D14	chr19:37333005-37332946	mm|19qC2		TCAGCATCTTCAATTAAAGCTAAGTGCAAAGGATGGAAATCTTGTTCCCTCAGCCGCCCA			0
A_52_P84347	4931419H13Rik	RIKEN cDNA 4931419H13 gene	Mus musculus RIKEN cDNA 4931419H13 gene (4931419H13Rik), long non-coding RNA [NR_040593]	NR_040593	NR_040593	70970	chr3	54887687	54887836	+	26251	112	308	A_52_P84347	FALSE	Mm.251485			ref|NR_040593|gb|AK016464|tc|TC1600269|riken|4931419H13	chr3:54887687-54887836	mm|3qC		AGAGAAAAGGGGTCCGTGTAGGAAATTGTATCAGAGAGAAAGGATCAGACAGACTCTTGG			0
A_52_P222096	4931428F04Rik	RIKEN cDNA 4931428F04 gene	Mus musculus RIKEN cDNA 4931428F04 gene (4931428F04Rik), transcript variant 1, mRNA [NM_028888]	NM_028888	NM_028888	74356	chr8	107804459	107804400	-	15604	145	281	A_52_P222096	FALSE	Mm.490326	ENSMUST00000171788		ref|NM_028888|ref|NM_001166394|ens|ENSMUST00000171788|ens|ENSMUST00000014981	chr8:107804459-107804400	mm|8qD3	GO:0003674(molecular_function)|GO:0005575(cellular_component)|GO:0008150(biological_process)	GCTTGGAAACACAGCTGGGAAGTTTGTATTCATTTACTTAGTAGATATGTGCAGAGCTCC	653319	KIAA0895L	0
A_51_P258473	4931429I11Rik	RIKEN cDNA 4931429I11 gene	Mus musculus RIKEN cDNA 4931429I11 gene (4931429I11Rik), mRNA [NM_001081121]	NM_001081121	NM_001081121	70989	chr9	40703651	40703592	-	25446	115	277	A_51_P258473	FALSE	Mm.335087	ENSMUST00000162122		ref|NM_001081121|ens|ENSMUST00000162122|ens|ENSMUST00000034521|ref|XM_006510598	chr9:040703651-040703592	mm|9qA5.1	GO:0003674(molecular_function)|GO:0005575(cellular_component)|GO:0007420(brain development)|GO:0032053(microtubule basal body organization)|GO:0033326(cerebrospinal fluid secretion)|GO:0035082(axoneme assembly)	GCTGCTTTCAAAGTCCTTCACATCGTCTAGACAGCGTTTAGTGGGGATCAAAAGTGCTAT	79864	C11orf63	0
A_55_P2239758	4931430N09Rik	RIKEN cDNA 4931430N09 gene	Mus musculus RIKEN cDNA 4931430N09 gene (4931430N09Rik), long non-coding RNA [NR_046053]	NR_046053	NR_046053	74363	chr6	118835501	118835560	+	61635	5	59	A_55_P2239758	FALSE	Mm.399403			ref|NR_046053|gb|AK016492|tc|TC1600695|riken|4931430N09	chr6:118835501-118835560	mm|6qF1		AAGACTGTCTTCCCGAGGACGGGAGTGTCTGTTGGTATAAAGAGTGCAGCAATTTGTTAT			0
A_55_P2327853	4931431B13Rik	RIKEN cDNA 4931431B13 gene	Mus musculus adult male testis cDNA, RIKEN full-length enriched library, clone:4931431B13 product:unclassifiable, full insert sequence. [AK016494]		AK016494	70973	chr7	135345676	135345617	-	22642	123	310	A_55_P2327853	FALSE	Mm.441564			gb|AK016494|riken|4931431B13|nap|NAP073308-1	chr7:135345676-135345617	mm|7qF3		GGGGAGAGAGAGTGAGGGAGTAGGATGTGTAAATACATTACTCATGTATGAAATTATCAA			0
A_55_P1957209	4932443I19Rik	RIKEN cDNA 4932443I19 gene	Mus musculus RIKEN cDNA 4932443I19 gene (4932443I19Rik), mRNA [NM_001101519]	NM_001101519	NM_001101519	403185	chr8	13742920	13742979	+	39773	71	160	A_55_P1957209	FALSE	Mm.252143	ENSMUST00000166277		ref|NM_001101519|ens|ENSMUST00000166277|ref|XM_006508821|gb|AK038767	chr8:013742920-013742979	mm|8qA1.1	GO:0003674(molecular_function)|GO:0005575(cellular_component)|GO:0008150(biological_process)	CACCAGATGACATAGCACAGCTATTTATTGTGTTTCTTGGACTGATAACCAAAAACAAAA			0
A_55_P2099770	4933400A11Rik	capping protein (actin filament) muscle Z-line, alpha 1 pseudogene	Mus musculus RIKEN cDNA 4933400A11 gene (4933400A11Rik), non-coding RNA [NR_003635]	NR_003635	NR_003635	66747	chrX	166214419	166214360	-	41360	66	266	A_55_P2099770	FALSE	Mm.34441			ref|NR_003635|gb|BC107241|gb|BC107240|gb|AK016585	chrX:166214419-166214360	mm|XqF5	GO:0003674(molecular_function)|GO:0005575(cellular_component)|GO:0008150(biological_process)	AACATGCTTAATGGCCCACTGTAGCAGTCTCTAGGAAGTGTGGGCATAAAAGATCCAACA			0
A_51_P181595	4933402N22Rik	RIKEN cDNA 4933402N22 gene	Mus musculus RIKEN cDNA 4933402N22 gene (4933402N22Rik), mRNA [NM_001177510]	NM_001177510	NM_001177510	545732	chr5	11919280	11919339	+	44269	58	23	A_51_P181595	FALSE	Mm.389066	ENSMUST00000170301		ref|NM_001177510|ens|ENSMUST00000170301|gb|AK077088|gb|BC133658	chr5:011919280-011919339	mm|5qA1	GO:0003674(molecular_function)|GO:0005575(cellular_component)|GO:0008150(biological_process)	TGCACCTCCTCATCCAGCTGAGAAATGAGCAGAGAGATCACCTGATCGATTTCAAAAAGA			0
A_52_P593853	4933402P03Rik	RIKEN cDNA 4933402P03 gene	Mus musculus RIKEN cDNA 4933402P03 gene (4933402P03Rik), mRNA [NM_175368]	NM_175368	NM_175368	108803	chr11	69630887	69630828	-	49523	42	11	A_52_P593853	FALSE	Mm.73263	ENSMUST00000056941		ref|NM_175368|ens|ENSMUST00000056941|ref|XM_006531970|gb|BC137961	chr11:069630887-069630828	mm|11qB3	GO:0003674(molecular_function)|GO:0005575(cellular_component)|GO:0008150(biological_process)|GO:0016020(membrane)|GO:0016021(integral to membrane)	GGCCAAATCAGAACTGAGGCTACAGGGCTTCGGTCCTCATTATTCACAGTCCCGGATTTG	201243	C17orf74	0
A_55_P2367350	4933403J19Rik	RIKEN cDNA 4933403J19 gene	Mus musculus adult male testis cDNA, RIKEN full-length enriched library, clone:4933403J19 product:unclassifiable, full insert sequence. [AK016636]		AK016636	71021	chr19	43998030	43998088	+	1490	188	301	A_55_P2367350	FALSE	Mm.434725			gb|AK016636|gb|AV278747|riken|4933403J19|nap|NAP073411-1	chr19:043998030-043998088	mm|19qC3		AGTCCCTCATGATGCCTTGACTCCAACTATAAAGTTGTTTTGTTCTTACTTCATAACTGC			0
A_55_P1978601	4933403O08Rik	RIKEN cDNA 4933403O08 gene	Mus musculus RIKEN cDNA 4933403O08 gene (4933403O08Rik), mRNA [NM_001177389]	NM_001177389	NM_001177389	71030	chrX	109357358	109357417	+	35260	85	2	A_55_P1978601	FALSE	Mm.158538	ENSMUST00000152343		ref|NM_001177389|ens|ENSMUST00000152343|ens|ENSMUST00000164272|gb|AK016644	chrX:109357358-109357417	mm|XqE1	GO:0003674(molecular_function)|GO:0005575(cellular_component)|GO:0008150(biological_process)	GTACAAACTTGACAACTCAATGCTAAATGGGACATCTACATTCTGAATACACAAAGAACA			0
A_52_P5905	4933407L21Rik	RIKEN cDNA 4933407L21 gene	Mus musculus RIKEN cDNA 4933407L21 gene (4933407L21Rik), long non-coding RNA [NR_037692]	NR_037692	NR_037692	71141	chr1	87828245	87828304	+	28270	106	206	A_52_P5905	FALSE	Mm.444245	ENSMUST00000188949		ref|NR_037692|ens|ENSMUST00000188949|gb|AK016730|gb|AK037440	chr1:87828245-87828304	mm|1qC5	GO:0003674(molecular_function)|GO:0005575(cellular_component)|GO:0008150(biological_process)	CTTATAGCCTATCATGAGGAGCATGTAAAATGTCTCACTGCTTGAAATAAACCTGTCTCA			0
A_55_P1960846	4933408B17Rik	RIKEN cDNA 4933408B17 gene	Mus musculus RIKEN cDNA 4933408B17 gene (4933408B17Rik), transcript variant hypothetical protein LOC271508, mRNA [NM_177773]	NM_177773	NM_177773	271508	chr18	34739612	34739553	-	15977	144	191	A_55_P1960846	FALSE	Mm.417609	ENSMUST00000056932		ref|NM_177773|ens|ENSMUST00000056932|ref|XM_011246938|ref|XM_011246939	chr18:034739612-034739553	mm|18qB1	GO:0003674(molecular_function)|GO:0005575(cellular_component)|GO:0008150(biological_process)	GGGGTACCAAGATCTGGATTTATGGTGTAAATATTGCTCATATTTTTGTTGCATAGACTT			0
A_55_P2376413	4933408N05Rik	RIKEN cDNA 4933408N05 gene	Mus musculus RIKEN cDNA 4933408N05 gene (4933408N05Rik), long non-coding RNA [NR_045831]	NR_045831	NR_045831	71122	chr8	116865119	116865061	-	9048	165	273	A_55_P2376413	FALSE	Mm.437539			ref|NR_045831|gb|AK016745|riken|4933408N05|nap|NAP073507-1	chr8:116865119-116865061	mm|8qE1		AGATAGCACCCAGTGAAGCACCTTTCTGTTTTAGTTTGACAATAAATCTATTCTGTCTCT			0
A_55_P2387790	4933412L11Rik	RIKEN cDNA 4933412L11 gene	Mus musculus adult male testis cDNA, RIKEN full-length enriched library, clone:4933412L11 product:unclassifiable, full insert sequence. [AK016793]		AK016793	74078	chr6	87943189	87943130	-	37991	77	115	A_55_P2387790	FALSE	Mm.381586			gb|AK016793|tc|TC1600432|riken|4933412L11|nap|NAP073470-1	chr6:87943189-87943130	mm|6qD1		CCCTGACACTCTTCTACTTTAGCTATGGCACAGGAACATTAAAAAGCAACAAAACAAAAC			0
A_55_P1955159	4933415F23Rik	RIKEN cDNA 4933415F23 gene	Mus musculus RIKEN cDNA 4933415F23 gene (4933415F23Rik), mRNA [NM_025746]	NM_025746	NM_025746	66755	chr1	23108840	23108781	-	25918	113	318	A_55_P1955159	FALSE	Mm.431297	ENSMUST00000073179		ref|NM_025746|ens|ENSMUST00000073179|gb|BC115556|gb|AK016819	chr1:023108840-023108781	mm|1qA5	GO:0003674(molecular_function)|GO:0005575(cellular_component)|GO:0045087(innate immune response)	GGACGACTGGATCTTAGAACAGCTCACTGGTCTCTACGACTGCAAGGAAGAGGAAATCCC	26472	PPP1R14B	0
A_55_P2189643	4933417C20Rik	RIKEN cDNA 4933417C20 gene	Mus musculus adult male testis cDNA, RIKEN full-length enriched library, clone:4933417C20 product:RIKEN cDNA 4933417C20 gene, full insert sequence. [AK016840]		AK016840	71128	chr1	162144843	162144902	+	51594	35	134	A_55_P2189643	FALSE	Mm.66849			gb|AK016840|riken|4933417C20|nap|NAP018068-001	chr1:162144843-162144902	mm|1qH2.1		AAGAGTGAAGGGCTATTTGTCCTAGAGGGACAAAGGACTGTCTCTGATTAAGAGAGGAGT			0
A_55_P2213418	4933417E11Rik	RIKEN cDNA 4933417E11 gene	Mus musculus RIKEN cDNA 4933417E11 gene (4933417E11Rik), long non-coding RNA [NR_040454]	NR_040454	NR_040454	71134	chr1	72005631	72005572	-	44763	56	20	A_55_P2213418	FALSE	Mm.370574			ref|NR_040454|gb|AK016843|riken|4933417E11|nap|NAP073515-1	chr1:72005631-72005572	mm|1qC3		ACTTTTGGTGGTCCAGCTGCCTTTGAATCATCGAGTAGATCAATAAACTCATTGGTTTGC			0
A_51_P275268	4933421I07Rik	RIKEN cDNA 4933421I07 gene	Mus musculus RIKEN cDNA 4933421I07 gene (4933421I07Rik), mRNA [NM_027702]	NM_027702	NM_027702	71162	chr7	49700995	49700936	-	41281	67	95	A_51_P275268	FALSE	Mm.158598	ENSMUST00000032648		ref|NM_027702|ref|XM_006541198|gb|AK016864|ens|ENSMUST00000032648	chr7:049700995-049700936	mm|7qB3	GO:0003674(molecular_function)|GO:0005575(cellular_component)|GO:0008150(biological_process)	TGATCTGCAGAGTTCCACCCAGATGAGGTTCCCCACCTAAGCTTATATTATTTCTTTATA			0
A_55_P2282336	4933425M03Rik	RIKEN cDNA 4933425M03 gene	Mus musculus adult male testis cDNA, RIKEN full-length enriched library, clone:4933425M03 product:unclassifiable, full insert sequence. [AK016922]		AK016922	71190	chr3	85693058	85693117	+	8995	165	52	A_55_P2282336	FALSE	Mm.67631			gb|AK016922|gb|AV281674|tc|TC1629307|riken|4933425M03	chr3:85693058-85693117	mm|3qF1		GCAAATGGGCAATTGATAATGAACTGTAAACCAAAATGAACCTTCCCTCTTTTTAAGTTG			0
A_51_P258848	4933427G17Rik	RIKEN cDNA 4933427G17 gene	Mus musculus RIKEN cDNA 4933427G17 gene (4933427G17Rik), mRNA [NM_028955]	NM_028955	NM_028955	74466	chr7	128158205	128158264	+	46058	52	54	A_51_P258848	FALSE	Mm.189707			ref|NM_028955|ref|XM_006508255|ref|XM_006508256|ref|XM_006508257	chr7:128158205-128158264	mm|7qF2	GO:0003674(molecular_function)|GO:0005575(cellular_component)|GO:0008150(biological_process)	TCCAGGTTATGCTGTGCTCATGGGCGCTCTCAGAAACATTCTTTATACCCTCTCATTTGT			0
A_51_P492897	4933430I17Rik	RIKEN cDNA 4933430I17 gene	Mus musculus RIKEN cDNA 4933430I17 gene (4933430I17Rik), mRNA [NM_177607]	NM_177607	NM_177607	214106	chr4	62208945	62209004	+	15017	147	143	A_51_P492897	FALSE	Mm.73212	ENSMUST00000062145		ref|NM_177607|ens|ENSMUST00000062145|ref|XM_006537740|ref|XM_011249972	chr4:062208945-062209004	mm|4qB3	GO:0003674(molecular_function)|GO:0005575(cellular_component)|GO:0008150(biological_process)	TCTTTACCTCCAAAACGAGTAAGAAAAAGCCCTAATCCTATGGAATATAGGCAGCTTTTC	257169	C9orf43	0
A_55_P2355676	4933431I19Rik	RIKEN cDNA 4933431I19 gene	Mus musculus adult male testis cDNA, RIKEN full-length enriched library, clone:4933431I19 product:weakly similar to OLFACTORY RECEPTOR MOR184-6, full insert sequence. [AK017005]		AK017005	71217	chr16	58914205	58914146	-	55180	24	178	A_55_P2355676	FALSE	Mm.158622			gb|AK017005|tc|TC1731788|riken|4933431I19|nap|NAP073583-1	chr16:58914205-58914146	mm|16qC1.2		GTCTTCCCAGGAATGTATCTGAGGGAATCTCTATAGATGCTTCTATTTTTAAGAAGTATA			0
A_66_P140082	5031410I06Rik	RIKEN cDNA 5031410I06 gene	Mus musculus RIKEN cDNA 5031410I06 gene (5031410I06Rik), mRNA [NM_207657]	NM_207657	NM_207657	381622	chr5	26425622	26425563	-	42599	63	83	A_66_P140082	FALSE	Mm.226878	ENSMUST00000063524		ref|NM_207657|gb|AK077239|ens|ENSMUST00000063524|ens|ENSMUST00000095004	chr5:026425622-026425563	mm|5qB1	GO:0003674(molecular_function)|GO:0005575(cellular_component)|GO:0008150(biological_process)	ATTTGGACAAAATGCGGTAGAGGGAAAGTTGTGGATTGAAGTTTGTGTGTTCTGCTCCCT			0
A_55_P2471029	5031434C07Rik	RIKEN cDNA 5031434C07 gene	Mus musculus 11 days pregnant adult female ovary and uterus cDNA, RIKEN full-length enriched library, clone:5031434C07 product:similar to H88 [Human herpesvirus 6], full insert sequence. [AK030322]		AK030322	100503613	chr6	112238771	112238830	+	15111	146	284	A_55_P2471029	FALSE	Mm.136719			gb|AK030322|riken|5031434C07	chr6:112238771-112238830	mm|6qE3	GO:0003674(molecular_function)|GO:0005575(cellular_component)|GO:0008150(biological_process)	GATGTTAAGAAGGCTCTGGACCATAGTATTTCTTCTTATCGTGAGTTGGCATTACATCCT			0
A_55_P2226660	5033418A18Rik	RIKEN cDNA 5033418A18 gene	Mus musculus 11 days pregnant adult female ovary and uterus cDNA, RIKEN full-length enriched library, clone:5033418A18 product:unclassifiable, full insert sequence. [AK017178]		AK017178	75961	chrX	45794962	45794903	-	1660	187	290	A_55_P2226660	FALSE	Mm.453414			gb|AK017178|gb|BX524508|tc|TC1716766|tc|TC1666651	chrX:45794962-45794903	mm|XqA4		AGGTGAAATCCTAGTAGGTCTAGATGGTGTTTGAAAGTGAAAATGCAGGCTGAGTGCAGC			0
A_55_P2416534	5033428I22Rik	RIKEN cDNA 5033428I22 gene	Mus musculus 13 days embryo lung cDNA, RIKEN full-length enriched library, clone:D430027E22 product:unclassifiable, full insert sequence. [AK142377]		AK142377	75996	chr8	59813836	59813895	+	31636	96	34	A_55_P2416534	FALSE	Mm.399754			gb|AK142377|riken|D430027E22	chr8:59813836-59813895	mm|8qB2	GO:0003674(molecular_function)|GO:0005575(cellular_component)|GO:0008150(biological_process)	TTACTTCACTGATACAGGTGTAACTGGGACTGAAAAGTCTTCAACAGTAAGAACACAACT			0
A_55_P2211164	5330406M23Rik	RIKEN cDNA 5330406M23 gene	Mus musculus adult male pituitary gland cDNA, RIKEN full-length enriched library, clone:5330406M23 product:unclassifiable, full insert sequence. [AK017236]		AK017236	76671	chr6	31058936	31058877	-	55473	23	248	A_55_P2211164	FALSE	Mm.109877			gb|AK017236|tc|TC1643535|riken|5330406M23|nap|NAP015269-001	chr6:31058936-31058877	mm|6qA3.3		GAGTTCGATCATAGCCAGAACTGTGTGGAAAGACCTTGTCTCAAAACTAAATATAAATAA			0
A_55_P2227735	5330411J11Rik	RIKEN cDNA 5330411J11 gene	Mus musculus RIKEN cDNA 5330411J11 gene (5330411J11Rik), long non-coding RNA [NR_040510]	NR_040510	NR_040510	76676	chr2	59220619	59220560	-	3808	181	257	A_55_P2227735	FALSE	Mm.110038			ref|NR_040510|gb|AK017239|tc|TC1615384|riken|5330411J11	chr2:59220619-59220560	mm|2qC1.1		GATCTTGGAATTAGTCTATCTTTGAGACTCCTTTAAGTCTTGGATTAAACGTGAGTTTTC			0
A_55_P2085835	5330417C22Rik	RIKEN cDNA 5330417C22 gene	Mus musculus RIKEN cDNA 5330417C22 gene (5330417C22Rik), mRNA [NM_001033304]	NM_001033304	NM_001033304	229722	chr3	108263917	108263858	-	52051	34	203	A_55_P2085835	FALSE	Mm.316890	ENSMUST00000185128		ref|NM_001033304|ens|ENSMUST00000185128|ens|ENSMUST00000048012|ref|XM_011240106	chr3:108263917-108263858	mm|3qF3	GO:0005764(lysosome)|GO:0005768(endosome)|GO:0005770(late endosome)|GO:0005794(Golgi apparatus)|GO:0005802(trans-Golgi network)|GO:0005886(plasma membrane)|GO:0005887(integral to plasma membrane)|GO:0006914(autophagy)|GO:0009267(cellular response to starvation)|GO:0016020(membrane)|GO:0016021(integral to membrane)|GO:0016236(macroautophagy)|GO:0044090(positive regulation of vacuole organization)|…	GCACCTGCACTGCCATCCTGCTTACTGTCCTGACCTGCTACTTTTGGAAGAAGAATCAAA	57535	KIAA1324	0
A_51_P182131	5330417C22Rik	RIKEN cDNA 5330417C22 gene	Mus musculus RIKEN cDNA 5330417C22 gene (5330417C22Rik), mRNA [NM_001033304]	NM_001033304	NM_001033304	229722	chr3	108261226	108261167	-	19617	133	127	A_51_P182131	FALSE	Mm.316890	ENSMUST00000185128		ref|NM_001033304|ens|ENSMUST00000185128|ens|ENSMUST00000048012|gb|AK017241	chr3:108261226-108261167	mm|3qF3	GO:0005764(lysosome)|GO:0005768(endosome)|GO:0005770(late endosome)|GO:0005794(Golgi apparatus)|GO:0005802(trans-Golgi network)|GO:0005886(plasma membrane)|GO:0005887(integral to plasma membrane)|GO:0006914(autophagy)|GO:0009267(cellular response to starvation)|GO:0016020(membrane)|GO:0016021(integral to membrane)|GO:0016236(macroautophagy)|GO:0044090(positive regulation of vacuole organization)|…	CGCTGCTGGGAATCTCTTCATTGTGGCCTTATCAGAAGTTTGGATTTCAGACCCTTGTTT	57535	KIAA1324	0
A_52_P40954	5330426P16Rik	RIKEN cDNA 5330426P16 gene	Mus musculus RIKEN cDNA 5330426P16 gene (5330426P16Rik), long non-coding RNA [NR_028300]	NR_028300	NR_028300	68190	chr16	50728158	50728099	-	27614	108	206	A_52_P40954	FALSE	Mm.482928			ref|NR_028300|gb|AK019912|gb|AK003970|gb|AK052569	chr16:50728158-50728099	mm|16qB5	GO:0003674(molecular_function)|GO:0005575(cellular_component)|GO:0008150(biological_process)	AGCAACGGCCTGCTTACCTTACTCCTTTAATCTACGTTATTCTGGAAAGTAACACTTGAA			0
A_55_P1981464	5430410E06Rik	RIKEN cDNA 5430410E06 gene	Mus musculus 6 days neonate head cDNA, RIKEN full-length enriched library, clone:5430410E06 product:unclassifiable, full insert sequence. [AK017289]		AK017289	71413	chr17	35399347	35399288	-	62442	2	86	A_55_P1981464	FALSE	Mm.439675			gb|AK017289|riken|5430410E06|nap|NAP000023-012	chr17:35399347-35399288	mm|17qB1	GO:0003674(molecular_function)|GO:0005575(cellular_component)|GO:0008150(biological_process)	ATGTAGAAGAATTGTCATTCTCAGTCCTGAGATTGTCCGGGTGGACCTAGGTCATTGTCT			0
A_55_P1981461	5430410E06Rik	RIKEN cDNA 5430410E06 gene	Mus musculus 6 days neonate head cDNA, RIKEN full-length enriched library, clone:5430410E06 product:unclassifiable, full insert sequence. [AK017289]		AK017289	71413	chr17	35399280	35399221	-	3795	181	283	A_55_P1981461	FALSE	Mm.439675			gb|AK017289|riken|5430410E06|nap|NAP000023-012	chr17:35399280-35399221	mm|17qB1	GO:0003674(molecular_function)|GO:0005575(cellular_component)|GO:0008150(biological_process)	GTAGACCCCGTTGTCCACTGGGAAGAGGGCTTGGTATCAAAGGAACATAAATTTTATTAA			0
A_55_P2278965	5430420F09Rik	RIKEN cDNA 5430420F09 gene	Mus musculus 6 days neonate head cDNA, RIKEN full-length enriched library, clone:5430420F09 product:unclassifiable, full insert sequence. [AK017326]		AK017326	74491	chr3	51875612	51875553	-	54098	28	45	A_55_P2278965	FALSE	Mm.394303			gb|AK017326|riken|5430420F09|nap|NAP073671-1	chr3:51875612-51875553	mm|3qC		TACTTATTTTCAGGAAAGACCTCCTGTGTACTAGGCAAATGTTTTGTCACTACCCTCTAC			0
A_55_P2082989	5430435G22Rik	RIKEN cDNA 5430435G22 gene	Mus musculus RIKEN cDNA 5430435G22 gene (5430435G22Rik), mRNA [NM_145509]	NM_145509	NM_145509	226421	chr1	133609965	133610024	+	49377	42	303	A_55_P2082989	FALSE	Mm.44508			ref|NM_145509|gb|AK030688|gb|BC019395|tc|TC1581683	chr1:133609965-133610024	mm|1qE4	GO:0000166(nucleotide binding)|GO:0003924(GTPase activity)|GO:0005525(GTP binding)|GO:0005764(lysosome)|GO:0005768(endosome)|GO:0005770(late endosome)|GO:0005774(vacuolar membrane)|GO:0005794(Golgi apparatus)|GO:0005802(trans-Golgi network)|GO:0006810(transport)|GO:0006886(intracellular protein transport)|GO:0007264(small GTPase mediated signal transduction)|GO:0008333(endosome to lysosome transp…	CTCAGTTACCCATGGTCAACTGTGGACCAAAAATATTAAATAGCAAATCCCAGAAATAAA	338382	RAB7B	0
A_66_P112773	5730409E04Rik	RIKEN cDNA 5730409E04Rik gene	Mus musculus RIKEN cDNA 5730409E04Rik gene (5730409E04Rik), transcript variant 1, mRNA [NM_001145950]	NM_001145950	NM_001145950	230757	chr4	126290486	126290545	+	20042	131	262	A_66_P112773	FALSE	Mm.296838	ENSMUST00000097886		ref|NM_001145950|ref|NM_001013755|ens|ENSMUST00000097886|ens|ENSMUST00000164362	chr4:126290486-126290545	mm|4qD2.2	GO:0003674(molecular_function)|GO:0005575(cellular_component)|GO:0008150(biological_process)	GCGGAGGCTGCAGCAGGGGTGGGAGTGGAGATAAAGAAAGATATAAGAAACTGTCCTCTT	127703	C1orf216	0
A_52_P23308	5730508B09Rik	RIKEN cDNA 5730508B09 gene	Mus musculus RIKEN cDNA 5730508B09 gene (5730508B09Rik), mRNA [NM_027482]	NM_027482	NM_027482	70617	chr3	127573687	127573628	-	50056	40	257	A_52_P23308	FALSE	Mm.317049	ENSMUST00000057198		ref|NM_027482|ens|ENSMUST00000057198|gb|BC144728|gb|BC116791	chr3:127573687-127573628	mm|3qG2	GO:0003674(molecular_function)|GO:0005575(cellular_component)|GO:0008150(biological_process)|GO:0016020(membrane)|GO:0016021(integral to membrane)	TATGTACAGCAGTAAAACACCAGACATTTGATAGCCATGTATGTAACTGATATACACTTG	132720	C4orf32	0
A_55_P2150145	5730522E02Rik	RIKEN cDNA 5730522E02 gene	Mus musculus RIKEN cDNA 5730522E02 gene (5730522E02Rik), long non-coding RNA [NR_027973]	NR_027973	NR_027973	70626	chr11	25548072	25548013	-	24567	118	67	A_55_P2150145	FALSE	Mm.379180	ENSMUST00000179180		ref|NR_027973|ens|ENSMUST00000179180|ens|ENSMUST00000125773|ens|ENSMUST00000153834	chr11:25548072-25548013	mm|11qA3.2	GO:0003674(molecular_function)|GO:0005575(cellular_component)|GO:0008150(biological_process)	CCGACTCTCCAAATACTGAGATTAAAGGTGTGTGGTTCCACATCTGGCCTCAAAGTGTTA			0
A_55_P1973563	5730559C18Rik	RIKEN cDNA 5730559C18 gene	Mus musculus RIKEN cDNA 5730559C18 gene (5730559C18Rik), mRNA [NM_028872]	NM_028872	NM_028872	67313	chr1	138110227	138110168	-	20888	129	209	A_55_P1973563	FALSE	Mm.36763	ENSMUST00000120339		ref|NM_028872|ens|ENSMUST00000120339|ref|XM_006529804|ref|XM_006529803	chr1:138110227-138110168	mm|1qE4	GO:0003674(molecular_function)|GO:0005575(cellular_component)|GO:0008150(biological_process)	ATTAATTAACTTATTGGTCTTACCTAACAGCTATCTCGTGTGGTTGCACCGTGGCGGTGC	55765	C1orf106	0
A_55_P2246344	5830407E08Rik	RIKEN cDNA 5830407E08 gene	Mus musculus 16 days neonate thymus cDNA, RIKEN full-length enriched library, clone:A130024J05 product:hypothetical protein, full insert sequence. [AK037541]		AK037541	76013	chr2	43850788	43850847	+	50972	37	66	A_55_P2246344	FALSE	Mm.446542			gb|AK037541|riken|A130024J05	chr2:43850788-43850847	mm|2qB		CACTTGCTTATCTACGGATGATTAGATATCTAAATAACATGTTTAAGGTGAATAGCCACC			0
A_55_P2349148	5830408B19Rik	RIKEN cDNA 5830408B19 gene	Mus musculus adult male thymus cDNA, RIKEN full-length enriched library, clone:5830408B19 product:unclassifiable, full insert sequence. [AK017909]		AK017909	74756	chr10	9342804	9342745	-	11252	158	130	A_55_P2349148	FALSE	Mm.291322			gb|AK017909|tc|TC1636327|riken|5830408B19|nap|NAP074865-1	chr10:9342804-9342745	mm|10qA1		CATCATTGTGATTTACAAACATATGCTTCCCCTTCAATAAATGTCACGGCTTTCACAGCG			0
A_55_P2164890	5830415F09Rik	RIKEN cDNA 5830415F09 gene	Mus musculus RIKEN cDNA 5830415F09 gene (5830415F09Rik), mRNA [NM_029086]	NM_029086	NM_029086	74753	chr4	46389906	46389847	-	935	190	99	A_55_P2164890	FALSE	Mm.45973	ENSMUST00000151903		ref|NM_029086|ens|ENSMUST00000151903|ref|XR_390347|gb|AK153576	chr4:046389906-046389847	mm|4qB1	GO:0003674(molecular_function)|GO:0005575(cellular_component)|GO:0008150(biological_process)|GO:0016289(CoA hydrolase activity)|GO:0016787(hydrolase activity)|GO:0034843(2-oxoglutaryl-CoA thioesterase activity)|GO:0034869(2,4,4-trimethyl-3-oxopentanoyl-CoA thioesterase activity)|GO:0034946(3-isopropylbut-3-enoyl-CoA thioesterase activity)|GO:0044466(glutaryl-CoA hydrolase activity)|GO:0047617(acy…	TGAAGCTAAGACTGCTCTTCACATCGTCAGGGGAAGAATATAATTGAAAACTACCCAACC	51531	TRMO	0
A_51_P443443	5830417I10Rik	gon-4-like pseudogene	Mus musculus RIKEN cDNA 5830417I10 gene (5830417I10Rik), non-coding RNA [NR_028359]	NR_028359	NR_028359	100302730	chr3	88629840	88629898	+	29930	101	166	A_51_P443443	FALSE	Mm.482358			ref|NR_028359|gb|AY040842|gb|AK017936|gb|BC040255	chr3:88629840-88629898	mm|3qF1		TGAGTGGTGTGTAGTGCTTATAGCTCTATTCTAGTGCTACCAATATATTGCTGCAAAACT			0
A_55_P2293434	5830419E12Rik	RIKEN cDNA 5830419E12 gene	Mus musculus adult male thymus cDNA, RIKEN full-length enriched library, clone:5830419E12 product:hypothetical protein, full insert sequence. [AK134048]		AK134048	100169880	chr15	80448346	80448405	+	48393	45	303	A_55_P2293434	FALSE				gb|AK134048|riken|5830419E12	chr15:80448346-80448405	mm|15qE1		AACTCACAAGGGACAATGGGGACAGTCACCAAACCTGCCTAGATAAAGATTATAAGGCCT			0
A_55_P2199777	5830443J22Rik	RIKEN cDNA 5830443J22 gene	Mus musculus adult male thymus cDNA, RIKEN full-length enriched library, clone:5830443J22 product:unclassifiable, full insert sequence. [AK017987]		AK017987	76056	chr9	71758427	71758368	-	5727	175	28	A_55_P2199777	FALSE	Mm.443345			gb|AK017987|riken|5830443J22	chr9:71758427-71758368	mm|9qD		GCTTAAACCCTAATATCACTGTCAATATATCCATCAGTAGAAAACCAATTTGTCCCTTTC			0
A_55_P2096174	5830473C10Rik	RIKEN cDNA 5830473C10 gene	Mus musculus RIKEN cDNA 5830473C10 gene (5830473C10Rik), mRNA [NM_001252661]	NM_001252661	NM_001252661	622307	chr5	91013958	91014017	+	4780	178	281	A_55_P2096174	FALSE	Mm.389654	ENSMUST00000094615		ref|NM_001252661|ens|ENSMUST00000094615|ref|XM_006535168|ref|XM_006535169	chr5:091013958-091014017	mm|5qE1	GO:0003674(molecular_function)|GO:0005575(cellular_component)|GO:0008150(biological_process)	TTAGTCTTAAAGAGGACTTGTGCCAAGCTCAGGACGAGGAACTGCAAATGGAAAAGCAGA			0
A_55_P2262141	5830487J09Rik	RIKEN cDNA 5830487J09 gene	Mus musculus 12 days embryo spinal ganglion cDNA, RIKEN full-length enriched library, clone:D130074J01 product:unclassifiable, full insert sequence. [AK051760]		AK051760	76118	chr5	123818669	123818728	+	29379	103	283	A_55_P2262141	FALSE				gb|AK051760|riken|D130074J01	chr5:123818669-123818728	mm|5qF		CGTATGCACACCGTGGCATGCAAACATGTATGTTAAAGAGACAAATGTGTTTTGTTTTTT			0
A_55_P2322555	5930433N17Rik	RIKEN cDNA 5930433N17 gene	Mus musculus 13 days embryo forelimb cDNA, RIKEN full-length enriched library, clone:5930433N17 product:unclassifiable, full insert sequence. [AK031230]		AK031230	399623	chr13	117805869	117805810	-	1646	187	318	A_55_P2322555	FALSE				gb|AK031230|riken|5930433N17	chr13:117805869-117805810	mm|13qD2.3		AGGCAAATATTTGACTAGTCCATTTAAATTCTCCATCATTACACTGCAGCACCGAGGAAG			0
A_55_P2269988	5930438M14Rik	RIKEN cDNA 5930438M14 gene	Mus musculus RIKEN cDNA 5930438M14 gene (5930438M14Rik), long non-coding RNA [NR_046158]	NR_046158	NR_046158	328324	chr13	102017272	102017331	+	13268	152	34	A_55_P2269988	FALSE	Mm.402274			ref|NR_046158|gb|AK031263|riken|5930438M14|nap|NAP075491-1	chr13:102017272-102017331	mm|13qD1		GTGCAATTTTGAGTGACAGATATACAACAAGAAAGGTGTAGGATGCTATTGATGTCAATA			0
A_66_P136813	6030408B16Rik	RIKEN cDNA 6030408B16 gene	Mus musculus RIKEN cDNA 6030408B16 gene (6030408B16Rik), long non-coding RNA [NR_033803]	NR_033803	NR_033803	77717	chr15	101126681	101126740	+	24571	118	59	A_66_P136813	FALSE	Mm.391998			ref|NR_033803|gb|AK020048|gb|BC150861|gb|AK144445	chr15:101126681-101126740	mm|15qF2	GO:0003674(molecular_function)|GO:0005575(cellular_component)|GO:0008150(biological_process)	GTGTCAGCCATCCAGCAACAGTTCCAGCATCGCTTCCCACGGCTTTGCCATTAAATAGGC			0
A_55_P2328787	6030451C04Rik	RIKEN cDNA 6030451C04 gene	Mus musculus 7 days neonate cerebellum cDNA, RIKEN full-length enriched library, clone:A730040I02 product:unclassifiable, full insert sequence. [AK080477]		AK080477	77115	chr4	104873467	104873526	+	232	192	193	A_55_P2328787	FALSE	Mm.447147			gb|AK080477|gb|AK020069|tc|TC1615290|riken|A730040I02	chr4:104873467-104873525	mm|4qC6		GCCAAGAAAACAAGGTTCCCCAACATTGCTCCTCATTAAAGGTTAGTTGAGTTTTCAACC			0
A_55_P1956457	6030458C11Rik	RIKEN cDNA 6030458C11 gene	Mus musculus RIKEN cDNA 6030458C11 gene (6030458C11Rik), transcript variant 2, mRNA [NM_029998]	NM_029998	NM_029998	77877	chr15	12738325	12738266	-	5741	175	327	A_55_P1956457	FALSE	Mm.207311	ENSMUST00000057256		ref|NM_029998|ens|ENSMUST00000057256|ref|XM_006520195|gb|AK035859	chr15:012738325-012738266	mm|15qA1	GO:0003674(molecular_function)|GO:0005575(cellular_component)|GO:0008150(biological_process)	CAGTGCATGGACTTAATTGAGTTTTAGCTGTTTTGGTTTTGGTTTTTTATTGTTGATGGG	55322	C5orf22	0
A_55_P2058260	6030498E09Rik	RIKEN cDNA 6030498E09 gene	Mus musculus RIKEN cDNA 6030498E09 gene (6030498E09Rik), mRNA [NM_183126]	NM_183126	NM_183126	77883	chrX	36315735	36315794	+	26600	111	266	A_55_P2058260	FALSE	Mm.113311			ref|NM_183126|gb|AK020088|tc|TC1592229|riken|6030498E09	chrX:036315735-036315794	mm|XqA3.3	GO:0003674(molecular_function)|GO:0005575(cellular_component)|GO:0008150(biological_process)	CTAGCTCCTAACCATTTCAAATATGGCCAGTTTGAATTTACATGTACTGTAGTTGTGAAA			0
A_55_P2324360	6230400D17Rik	RIKEN cDNA 6230400D17 gene	Mus musculus 11 days embryo head cDNA, RIKEN full-length enriched library, clone:6230400D17 product:hypothetical protein, full insert sequence. [AK018074]		AK018074	76133	chr14	21506521	21506462	-	10581	160	160	A_55_P2324360	FALSE	Mm.482976			gb|AK018074|tc|TC1590826|riken|6230400D17|nap|NAP018147-001	chr14:21506521-21506462	mm|14qA3	GO:0003674(molecular_function)|GO:0005575(cellular_component)|GO:0008150(biological_process)	TACTATGTGGGTAGGCTGTGCTGGGATTTTCCTAAGGGCTTCAATTACAGGTGTAAACCT			0
A_51_P417251	6330403K07Rik	RIKEN cDNA 6330403K07 gene	Mus musculus RIKEN cDNA 6330403K07 gene (6330403K07Rik), mRNA [NM_134022]	NM_134022	NM_134022	103712	chr11	70845753	70845694	-	13803	150	276	A_51_P417251	FALSE	Mm.27768			ref|NM_134022|gb|AK083923|gb|AK018106|gb|AJ271140	chr11:070845753-070845694	mm|11qB4	GO:0003674(molecular_function)|GO:0005575(cellular_component)|GO:0008150(biological_process)	ATAGGAGGACTGTGCTAGAGAATTCTATGGTGACTTCATTTCAGCCTGGAGGCCTTCTAA			0
A_51_P244531	6330403L08Rik	RIKEN cDNA 6330403L08 gene	Mus musculus cDNA, RIKEN full-length enriched library, clone:M5C1016E23 product:hypothetical Proline-rich region profile/Alanine-rich region profile containing protein, full insert sequence. [AK147342]		AK147342	70744	chr5	139476432	139476491	+	38100	76	226	A_51_P244531	FALSE	Mm.394573			gb|AK147342|gb|AK018107|riken|M5C1016E23|riken|6330403L08	chr5:139476432-139476491	mm|5qG2	GO:0003674(molecular_function)|GO:0005575(cellular_component)|GO:0008150(biological_process)	AGCCCCCAGAGTAAATCTTTTTGTTAGTGATTTCTGTACTATGGATTAGAGTGATAACAT			0
A_55_P2238406	6330407A03Rik	RIKEN cDNA 6330407A03 gene	Mus musculus RIKEN cDNA 6330407A03 gene (6330407A03Rik), long non-coding RNA [NR_028126]	NR_028126	NR_028126	70720	chr4	3643888	3643947	+	47586	47	278	A_55_P2238406	FALSE	Mm.445696			ref|NR_028126|gb|AK018133|tc|TC1591021|riken|6330407A03	chr4:3643888-3643947	mm|4qA1		ACCTAGCATAACCATGTTTTTACAGGAGTAAAACATTGTAGCTTATGTGGATACCTTGAT			0
A_55_P2167630	6330416G13Rik	RIKEN cDNA 6330416G13 gene	Mus musculus RIKEN cDNA 6330416G13 gene (6330416G13Rik), mRNA [NM_144905]	NM_144905	NM_144905	230279	chr4	63244940	63244999	+	5359	176	108	A_55_P2167630	FALSE	Mm.41523	ENSMUST00000080336		ref|NM_144905|ens|ENSMUST00000080336|ens|ENSMUST00000077709|ref|XM_006537871	chr4:063244940-063244999	mm|4qC1	GO:0003674(molecular_function)|GO:0005575(cellular_component)|GO:0008150(biological_process)|GO:0016020(membrane)|GO:0016021(integral to membrane)	TGCCAGCTCATAGAAGTACACGTTCTGGGCACAGGATGTTGCCCGTTCCTGGCTAGGTGA	203197	C9orf91	0
A_55_P1968544	6330549D23Rik	RIKEN cDNA 6330549D23 gene	Mus musculus RIKEN cDNA 6330549D23 gene (6330549D23Rik), non-coding RNA [NR_003619]	NR_003619	NR_003619	229613	chr3	96410685	96410626	-	16742	141	302	A_55_P1968544	FALSE	Mm.445135	ENSMUST00000059190		ref|NR_003619|ens|ENSMUST00000059190|ens|ENSMUST00000160818|gb|AK032024	chr3:96410685-96410626	mm|3qF2.1		AACTCATGTTTAAATGCTTATACCATGATGCTGCGAACACAAAAGGGAATATTTGGGTTT			0
A_55_P2149363	6430548M08Rik	RIKEN cDNA 6430548M08 gene	Mus musculus RIKEN cDNA 6430548M08 gene (6430548M08Rik), transcript variant 1, mRNA [NM_172286]	NM_172286	NM_172286	234797	chr8	122686729	122686788	+	35514	84	150	A_55_P2149363	FALSE	Mm.101958	ENSMUST00000108950		ref|NM_172286|ref|NM_001163760|ref|NM_001163761|ens|ENSMUST00000108950	chr8:122686729-122686788	mm|8qE1	GO:0003674(molecular_function)|GO:0005575(cellular_component)|GO:0008150(biological_process)	TTGAGACTGTTCCTGCTGACCTTTTGAGATAGTCACTTAAGGAAGGATGGCTCTCTCTCA	9764	KIAA0513	0
A_55_P2095894	6430548M08Rik	RIKEN cDNA 6430548M08 gene	Mus musculus RIKEN cDNA 6430548M08 gene (6430548M08Rik), transcript variant 1, mRNA [NM_172286]	NM_172286	NM_172286	234797	chr8	122686414	122686473	+	9941	162	128	A_55_P2095894	FALSE	Mm.101958	ENSMUST00000034281		ref|NM_172286|ref|NM_001163760|ref|NM_001163761|ens|ENSMUST00000034281	chr8:122686414-122686473	mm|8qE1	GO:0003674(molecular_function)|GO:0005575(cellular_component)|GO:0008150(biological_process)	TAGGATCCTATAACCATGCCTGTCCCTGCTCTGTGTTTTAGGGAAGTGACATAAAGTGAG	9764	KIAA0513	0
A_55_P2168271	6430553K19Rik	RIKEN cDNA 6430553K19 gene	Mus musculus adult male olfactory brain cDNA, RIKEN full-length enriched library, clone:6430553K19 product:hypothetical protein, full insert sequence. [AK135041]		AK135041	619300	chr16	48122244	48122185	-	22805	123	311	A_55_P2168271	FALSE	Mm.384092			gb|AK135041|tc|TC1591153|riken|6430553K19	chr16:048122244-048122185	mm|16qB5	GO:0003674(molecular_function)|GO:0005575(cellular_component)|GO:0008150(biological_process)	AGAATTGAAACCTGTCCCATCTGTAGGCACAAATGGACACTTATGTGTGACACTGCATTT			0
A_52_P468683	6430571L13Rik	RIKEN cDNA 6430571L13 gene	Mus musculus RIKEN cDNA 6430571L13 gene (6430571L13Rik), mRNA [NM_175486]	NM_175486	NM_175486	235599	chr9	107251489	107251548	+	7260	170	242	A_52_P468683	FALSE	Mm.71039	ENSMUST00000042581		ref|NM_175486|ens|ENSMUST00000042581|gb|AK032358|tc|TC1584643	chr9:107251489-107251548	mm|9qF1	GO:0003674(molecular_function)|GO:0005575(cellular_component)|GO:0008150(biological_process)|GO:0016020(membrane)|GO:0016021(integral to membrane)	TCCTTTGAGGTAAAGACCTAAAGAAGCAAGTCTGACTTTAGTTTTTCCTTTCCACCGTAT	51161	C3orf18	0
A_51_P446825	6430573F11Rik	RIKEN cDNA 6430573F11 gene	Mus musculus RIKEN cDNA 6430573F11 gene (6430573F11Rik), mRNA [NM_176952]	NM_176952	NM_176952	319582	chr8	37575761	37575820	+	51726	35	197	A_51_P446825	FALSE	Mm.180924	ENSMUST00000171777		ref|NM_176952|ens|ENSMUST00000171777|ref|XM_006509133|ref|XM_006509138	chr8:037575761-037575820	mm|8qA4	GO:0000179(rRNA (adenine-N6,N6-)-dimethyltransferase activity)|GO:0003674(molecular_function)|GO:0003880(protein C-terminal carboxyl O-methyltransferase activity)|GO:0004809(tRNA (guanine-N2-)-methyltransferase activity)|GO:0005575(cellular_component)|GO:0008033(tRNA processing)|GO:0008150(biological_process)|GO:0008152(metabolic process)|GO:0008168(methyltransferase activity)|GO:0008169(C-methyl…	CTTAAGCACTTTGACCGCATCTTCCTAATTGTTGAGTAAGCACGAAGTCTGACACGTACT	57604	KIAA1456	0
A_55_P2248556	6530402F18Rik	RIKEN cDNA 6530402F18 gene	Mus musculus mRNA for mKIAA1857 protein. [AK220426]		AK220426	76220	chr2	29099048	29098989	-	43261	61	71	A_55_P2248556	FALSE	Mm.471653			gb|AK220426	chr2:29099048-29098989	mm|2qB		TCTAAGAAGCCTCCAGAGATATGACAGTTTGCAGTCCCACGCCATCTAAGTTCAACATAG			0
A_66_P140574	6530403H02Rik	RIKEN cDNA 6530403H02 gene	Mus musculus 10 days neonate cortex cDNA, RIKEN full-length enriched library, clone:A830005H01 product:unclassifiable, full insert sequence. [AK043526]		AK043526	320739	chr3	120397961	120397902	-	21054	128	206	A_66_P140574	FALSE	Mm.409467			gb|AK043526|riken|A830005H01|nap|NAP082486-1	chr3:120397961-120397902	mm|3qG1	GO:0003674(molecular_function)|GO:0005575(cellular_component)|GO:0008150(biological_process)	AGACACTACTTAGAAATCTTTATTAATGGCCCCTGAAATCTAGGATCTGGTATATATGAT			0
A_55_P2193424	6720420G18Rik	RIKEN cDNA 6720420G18 gene	Mus musculus 12 days embryo male wolffian duct includes surrounding region cDNA, RIKEN full-length enriched library, clone:6720420G18 product:unclassifiable, full insert sequence. [AK020112]		AK020112	77072	chr5	15476690	15476749	+	60433	8	168	A_55_P2193424	FALSE	Mm.446079			gb|AK020112|gb|BB050783|tc|TC1609645|riken|6720420G18	chr5:15476690-15476749	mm|5qA2		CACATGGAGTATTCAGTTGTTACGATGGTTTTTAATTTTGAGGTTCGTTTTGGGAATTAC			0
A_55_P2244677	6720422M22Rik	RIKEN cDNA 6720422M22 gene	Mus musculus 12 days embryo male wolffian duct includes surrounding region cDNA, RIKEN full-length enriched library, clone:6720422M22 product:unclassifiable, full insert sequence. [AK032738]		AK032738	99946	chr3	148593879	148593820	-	49934	40	174	A_55_P2244677	FALSE	Mm.440672			gb|AK032738|riken|6720422M22	chr3:148593879-148593820	mm|3qH3		AGCATGTTTTCCCACACAGAAAGCCTGGTAGTTGAGTTGTATATATTTAGTGTTAGGAGC			0
A_55_P2193064	6720473M08Rik	RIKEN cDNA 6720473M08 gene	Mus musculus 12 days embryo eyeball cDNA, RIKEN full-length enriched library, clone:D230040F06 product:hypothetical protein, full insert sequence. [AK142114]		AK142114	320121	chr16	52417305	52417246	-	20131	131	84	A_55_P2193064	FALSE	Mm.406292			gb|AK142114|gb|BB471708|riken|D230040F06	chr16:52417305-52417246	mm|16qB5		CCAGAGGCAAAAAAGGAAATGAATAAAAAGTGCCAGATTTTCTTAAGCCTTAAAGTAGGT			0
A_55_P2384701	6720482D04	uncharacterized protein 6720482D04	Mus musculus 12 days embryo male wolffian duct includes surrounding region cDNA, RIKEN full-length enriched library, clone:6720482D04 product:unclassifiable, full insert sequence. [AK032964]		AK032964	328456	chr14	94137787	94137728	-	46052	52	66	A_55_P2384701	FALSE	Mm.446102			gb|AK032964|gb|BB055538|tc|TC1618722|riken|6720482D04	chr14:94137787-94137728	mm|14qE2.1		CTGTATGTTCCAGTAAATACTCATATGCATATGGTCAGCACTAAGGATTATGAGCTAAAA			0
A_55_P2383128	6820445E23Rik	RIKEN cDNA 6820445E23 gene	Mus musculus 12 days embryo female mullerian duct includes surrounding region cDNA, RIKEN full-length enriched library, clone:6820445E23 product:hypothetical protein, full insert sequence. [AK135532]		AK135532	100038580	chr11	26286194	26286135	-	36822	80	158	A_55_P2383128	FALSE	Mm.392039			gb|AK135532|riken|6820445E23	chr11:26286194-26286135	mm|11qA3.3		GAGAACCAGTATGATAAGACTTTCTCAAAATGTGACTCAGATTGCAGTGTTGTCAGCACT			0
A_55_P2364916	8030402F09Rik	RIKEN cDNA 8030402F09 gene	AGENCOURT_12237675 NIH_MGC_165 Mus musculus cDNA clone IMAGE:30281839 5', mRNA sequence [CB320031]		CB320031	78734	chrY_random	23367439	23367380	-	28676	105	50	A_55_P2364916	FALSE	Mm.258969			gb|CB320031	unmapped			AATAAGGTTTTAGAAAAAGCAGTTTATCCCCCTGTTTTTGAGATCTTTTTAAGCAAAAAA			0
A_55_P2258216	8030425K09Rik	RIKEN cDNA 8030425K09 gene	Mus musculus 15 days embryo male testis cDNA, RIKEN full-length enriched library, clone:8030425K09 product:unclassifiable, full insert sequence. [AK020195]		AK020195	77207	chr7	103735353	103735412	+	18608	136	177	A_55_P2258216	FALSE				gb|AK020195|tc|TC1614244|riken|8030425K09	chr7:103735353-103735412	mm|7qE1		TGTGTTGTAGTATGTTAACTGCAATCCTTGCCTTGACCCTAGCACCTCTTCTGGGTTGTA			0
A_51_P316935	8430408G22Rik	RIKEN cDNA 8430408G22 gene	Mus musculus RIKEN cDNA 8430408G22 gene (8430408G22Rik), transcript variant 1, mRNA [NM_145980]	NM_145980	NM_145980	213393	chr6	116602564	116602623	+	35875	83	84	A_51_P316935	FALSE	Mm.38231	ENSMUST00000067354		ref|NM_145980|ref|NM_001166580|ens|ENSMUST00000067354|ens|ENSMUST00000178241	chr6:116602564-116602623	mm|6qE3	GO:0003674(molecular_function)|GO:0005737(cytoplasm)|GO:0005739(mitochondrion)|GO:0008150(biological_process)	TTGGTTTTATCATGACTAAAGTGAGTGTAGGTGGAGTGACCACCTCCCAGATTGCTCTAA	11067	C10orf10	0
A_55_P2416494	8430426J06Rik	RIKEN cDNA 8430426J06 gene	Mus musculus RIKEN cDNA 8430426J06 gene (8430426J06Rik), transcript variant 1, long non-coding RNA [NR_077229]	NR_077229	NR_077229	78102	chr15	81073151	81073092	-	44553	57	111	A_55_P2416494	FALSE	Mm.296832			ref|NR_077229|ref|NR_077230|ref|NR_077231|gb|AK020235	chr15:81073151-81073092	mm|15qE1		CGTTTGTATTCATTTTGTGTGAGTGCATGTGTGTATTTGGGTGCAAATAAAAGCCAAGGG			0
A_55_P2437763	8430431K14Rik	RIKEN cDNA 8430431K14 gene	Mus musculus RIKEN cDNA 8430431K14 gene (8430431K14Rik), long non-coding RNA [NR_002849]	NR_002849	NR_002849	78103	chr19	31288725	31288666	-	25837	114	151	A_55_P2437763	FALSE	Mm.445198			ref|NR_002849|gb|AK020237|gb|BC020133|gb|AK046503	chr19:31288725-31288666	mm|19qC1		CTTATGGAAGCATTTTCTCATTTGATGTTCCTTCTTAGATGACTGTACCTTGTATCATGT			0
A_55_P2243728	9030405F24Rik	RIKEN cDNA 9030405F24 gene	Mus musculus adult male colon cDNA, RIKEN full-length enriched library, clone:9030405F24 product:hypothetical protein, full insert sequence. [AK018486]		AK018486	74531	chr6	54275894	54275835	-	55565	23	64	A_55_P2243728	FALSE	Mm.41984			gb|AK018486|riken|9030405F24	chr6:54275894-54275835	mm|6qB3		GGGAAGAGGAAAATACAAGGACTTGGTTGGTGTCTTAGTTTGGATTCAATTAAAAAATGA			0
A_55_P2414594	9030613N10Rik	RIKEN cDNA 9030613N10 gene	Mus musculus 2 days neonate sympathetic ganglion cDNA, RIKEN full-length enriched library, clone:7120469A12 product:unclassifiable, full insert sequence. [AK148965]		AK148965	71569	chr10	9017869	9017810	-	14897	147	56	A_55_P2414594	FALSE	Mm.387335			gb|AK148965|riken|7120469A12	chr10:9017869-9017810	mm|10qA1		GAGTACAACAGCGCTGAATGAAGCTAGGTGAATTGTTCTGGCTAGTCTATTTGTATTTTT			0
A_55_P2031999	9030617O03Rik	RIKEN cDNA 9030617O03 gene	Mus musculus RIKEN cDNA 9030617O03 gene (9030617O03Rik), mRNA [NM_145448]	NM_145448	NM_145448	217830	chr12	102110492	102110551	+	59882	10	285	A_55_P2031999	FALSE	Mm.218590	ENSMUST00000167322		ref|NM_145448|ens|ENSMUST00000167322|ens|ENSMUST00000110069|ens|ENSMUST00000069782	chr12:102110492-102110551	mm|12qE	GO:0003674(molecular_function)|GO:0005739(mitochondrion)|GO:0008150(biological_process)	GGGCCTTCATTGTGAAAAAGGAACACATGGTATGGATTTTACACTCCAATAAAATATAAG	80017	C14orf159	0
A_66_P122086	9030619P08Rik	lymphocyte antigen 6 complex pseudogene	Mus musculus RIKEN cDNA 9030619P08 gene (9030619P08Rik), non-coding RNA [NR_108041]	NR_108041	NR_108041	105892	chr15	75261818	75260421	-	52196	33	242	A_66_P122086	FALSE	Mm.38909	ENSMUST00000096397		ref|NR_108041|ens|ENSMUST00000096397|gb|BC147461|gb|BC147464	chr15:75261818-75260421	mm|15qD3		GCCCTACTGCGTGCAGAAAGAGTTCAGGGGCTGGAATGCTACCAGTGTTTTGATGTCCCA			0
A_55_P2409306	9030624J02Rik	RIKEN cDNA 9030624J02 gene	Mus musculus 16 days neonate cerebellum cDNA, RIKEN full-length enriched library, clone:9630009L01 product:hypothetical protein, full insert sequence. [AK035840]		AK035840	71517	chr7	125899034	125899093	+	15268	146	297	A_55_P2409306	FALSE				gb|AK035840|tc|TC1616397|riken|9630009L01|nap|NAP079079-1	chr7:125899034-125899093	mm|7qF2	GO:0003674(molecular_function)|GO:0005622(intracellular)|GO:0005623(cell)|GO:0005768(endosome)|GO:0006810(transport)|GO:0006893(Golgi to plasma membrane transport)|GO:0015031(protein transport)|GO:0016020(membrane)|GO:0016021(integral to membrane)	GCCATGGCACACAGTGGAGTGTTCTTTCTCTCTCTCACACACACATAACAAGTAAATACA	57020	C16orf62	0
A_55_P2413939	9030625G05Rik	RIKEN cDNA 9030625G05 gene	Mus musculus RIKEN cDNA 9030625G05 gene (9030625G05Rik), long non-coding RNA [NR_110446]	NR_110446	NR_110446	71545	chr18	75132478	75132419	-	62853	1	247	A_55_P2413939	FALSE	Mm.488094			ref|NR_110446|gb|AK018576|gb|BB277633|gb|BB281435	chr18:75132478-75132419	mm|18qE2		GCAAGAAGAATTTGGGCGATTTTACTGCTTACTTGACTCTGAAATAAAATTTAGGTCCTT			0
A_52_P499028	9130008F23Rik	RIKEN cDNA 9130008F23 gene	Mus musculus RIKEN cDNA 9130008F23 gene (9130008F23Rik), mRNA [NM_027834]	NM_027834	NM_027834	71583	chr17	41013364	41013305	-	24797	117	263	A_52_P499028	FALSE	Mm.158733	ENSMUST00000068258		ref|NM_027834|ens|ENSMUST00000068258|gb|AK018601|gb|AK033670	chr17:041013364-041013305	mm|17qB2	GO:0003674(molecular_function)|GO:0005575(cellular_component)|GO:0008150(biological_process)	TCTGTTATTACCTGTGATATTCAATACATTTGACCCGCGGTTGTATTGAGGGGCCATATC	135398	C6orf141	0
A_55_P2004960	9130017K11Rik	RIKEN cDNA 9130017K11 gene	Mus musculus 10, 11 days embryo whole body cDNA, RIKEN full-length enriched library, clone:2810451K12 product:ubiquitin specific protease 43, full insert sequence. [AK013327]		AK013327	72804	chr11	67737235	67737294	+	45250	55	29	A_55_P2004960	FALSE				gb|AK013327|riken|2810451K12|nap|NAP016736-001	chr11:67737235-67737294	mm|11qB3	GO:0003674(molecular_function)|GO:0005575(cellular_component)|GO:0008150(biological_process)	AAGGCTAATTTTTGATTGTCGATTCGATCAAATTAAGAATCACCTGATGACCCTGTCTCG			0
A_55_P2402134	9130020K20Rik	RIKEN cDNA 9130020K20 gene	Mus musculus adult male cecum cDNA, RIKEN full-length enriched library, clone:9130020K20 product:unclassifiable, full insert sequence. [AK078921]		AK078921	108858	chr4	135905891	135905950	+	26005	113	144	A_55_P2402134	FALSE				gb|AK078921|tc|TC1655347|riken|9130020K20	chr4:135905891-135905950	mm|4qD3		CAGTAGGTAGGGTTAATTGGTAGACTATCATGTACAGCCCTTTGGGTTTATCCCAACACC			0
A_55_P2410106	9130230N09Rik	RIKEN cDNA 9130230N09 gene	Mus musculus adult male cecum cDNA, RIKEN full-length enriched library, clone:9130230N09 product:unclassifiable, full insert sequence. [AK020289]		AK020289	100137727	chr11	22761160	22761219	+	9112	165	145	A_55_P2410106	FALSE	Mm.258094			gb|AK020289|riken|9130230N09|nap|NAP075884-1	chr11:22761160-22761219	mm|11qA3.2		CAAGAAAGGAAGAGAAATTGTATGCTTTTCTTGACTCTGAGGAATTTTTTCCCACGATTA			0
A_55_P2206269	9130403I23Rik	RIKEN cDNA 9130403I23 gene	Mus musculus 12 days embryo embryonic body between diaphragm region and neck cDNA, RIKEN full-length enriched library, clone:9430045F20 product:unclassifiable, full insert sequence. [AK034835]		AK034835	71585	chr3	8927959	8928018	+	37203	79	52	A_55_P2206269	FALSE	Mm.381338			gb|AK034835|riken|9430045F20|nap|NAP120635-001	chr3:8927959-8928018	mm|3qA1		GTGGGGTGCAGAGGGGAAACTAGGAAGGGGGCATTTGAAATGTAAATAAAATAACCAATT			0
A_66_P126323	9230102O04Rik	RIKEN cDNA 9230102O04 gene	Mus musculus RIKEN cDNA 9230102O04 gene (9230102O04Rik), long non-coding RNA [NR_040511]	NR_040511	NR_040511	77682	chr2	9804803	9804744	-	61110	6	126	A_66_P126323	FALSE	Mm.488621	ENSMUST00000114915		ref|NR_040511|ens|ENSMUST00000114915|ens|ENSMUST00000125091|gb|AK020309	chr2:9804803-9804744	mm|2qA1	GO:0003674(molecular_function)|GO:0005575(cellular_component)|GO:0008150(biological_process)	CCTAAGACAAAATGATCAAGGAACCCAACCCGTACCTTCACAACCAGACCCTCCGGGTTA			0
A_51_P144894	9230104L09Rik	RIKEN cDNA 9230104L09 gene	Mus musculus RIKEN cDNA 9230104L09 gene (9230104L09Rik), mRNA [NM_029960]	NM_029960	NM_029960	77705	chr2	148672592	148672533	-	36186	82	118	A_51_P144894	FALSE	Mm.159975	ENSMUST00000028937		ref|NM_029960|ens|ENSMUST00000028937|gb|BC104303|gb|AK020314	chr2:148672592-148672533	mm|2qG3	GO:0003674(molecular_function)|GO:0005575(cellular_component)|GO:0008150(biological_process)	GGATACTGCCATTCATAGGAATCAGCAATTACAGGCTTAAGAAGCTGTGCAAGTGTCTGC	128822	CST9	0
A_55_P2241553	9330133O14Rik	RIKEN cDNA 9330133O14 gene	Mus musculus RIKEN cDNA 9330133O14 gene (9330133O14Rik), long non-coding RNA [NR_045696]	NR_045696	NR_045696	100689703	chr8	124970309	124970368	+	46549	51	55	A_55_P2241553	FALSE	Mm.471548			ref|NR_045696|gb|AK033985|tc|TC1599174|riken|9330133O14	chr8:124970309-124970368	mm|8qE1		CTGCCTATAACCCATTACCCATTGCTCTATCAGTAAGCCAAATAAACTTGTTAATTCCTC			0
A_55_P2021560	9330133O14Rik	RIKEN cDNA 9330133O14 gene	Mus musculus RIKEN cDNA 9330133O14 gene (9330133O14Rik), long non-coding RNA [NR_045696]	NR_045696	NR_045696	100689703	chr8	124968087	124968146	+	11471	158	19	A_55_P2021560	FALSE	Mm.471548	ENSMUST00000193105		ref|NR_045696|ens|ENSMUST00000193105|gb|AK042662|gb|AK085519	chr8:124968087-124968146	mm|8qE1		AGATACAACTTCCTGGTTCCACCTCCTGTAAAATCGTGGCTGTTGAATGGCTTAGAGTTC			0
A_55_P2277475	9330179D12Rik	RIKEN cDNA 9330179D12 gene	Mus musculus RIKEN cDNA 9330179D12 gene (9330179D12Rik), transcript variant 1, long non-coding RNA [NR_040273]	NR_040273	NR_040273	77558	chr6	127162370	127162429	+	62906	1	141	A_55_P2277475	FALSE	Mm.358918			ref|NR_040273|ref|NR_040274|ref|NR_040275|gb|AK020388	chr6:127162370-127162429	mm|6qF3	GO:0003674(molecular_function)|GO:0005575(cellular_component)|GO:0008150(biological_process)	GACTACCTGTAACACCTCACCCATTGCTATGTAATAAGCCTAATAAAGTCGTTGGTTTCC			0
A_55_P2258961	9330184L24Rik	RIKEN cDNA 9330184L24 gene	Mus musculus adult male diencephalon cDNA, RIKEN full-length enriched library, clone:9330184L24 product:unclassifiable, full insert sequence. [AK034378]		AK034378	402729	chrX	117048161	117048220	+	16767	141	252	A_55_P2258961	FALSE	Mm.119051			gb|AK034378|riken|9330184L24|nap|NAP078373-1	chrX:117048161-117048220	mm|XqE1		GCATGTTAAGAAACAGTAGAAGTTGGGAAACGTGTCTACTGTTTATATGTGAATGAATGT			0
A_55_P2419021	9330188P03Rik	RIKEN cDNA 9330188P03 gene	Mus musculus RIKEN cDNA 9330188P03 gene (9330188P03Rik), long non-coding RNA [NR_102319]	NR_102319	NR_102319	380930	chr14	105993043	105993102	+	9753	163	175	A_55_P2419021	FALSE	Mm.431145			ref|NR_102319|gb|AK034417|gb|FJ744746|gb|FJ860514	chr14:105993043-105993102	mm|14qE2.3	GO:0003674(molecular_function)|GO:0005575(cellular_component)|GO:0008150(biological_process)	GGCCTAACTCTAATTTTCCATTTCTGTAGGGGAAAATGTCTATAAACATTTCAGCTCAAT			0
A_55_P2034784	9430008C03Rik	RIKEN cDNA 9430008C03 gene	Mus musculus RIKEN cDNA 9430008C03 gene (9430008C03Rik), transcript variant 1, long non-coding RNA [NR_015463]	NR_015463	NR_015463	68108	chr2	158185110	158185051	-	5607	175	268	A_55_P2034784	FALSE	Mm.119198			ref|NR_015463|gb|AK079109|gb|AK046044|gb|AK040893	chr2:158185110-158185051	mm|2qH1	GO:0003674(molecular_function)|GO:0005575(cellular_component)|GO:0008150(biological_process)	ATACAGAGGAAGTAACGTGTCGCTGCTACTCTTCCATGCCCAGTGCCAGGAGCGACGGTA			0
A_55_P2081950	9430015G10Rik	RIKEN cDNA 9430015G10 gene	Mus musculus RIKEN cDNA 9430015G10 gene (9430015G10Rik), transcript variant 1, mRNA [NM_177205]	NM_177205	NM_177205	230996	chr4	155500269	155500328	+	53054	31	165	A_55_P2081950	FALSE	Mm.318925	ENSMUST00000105576		ref|NM_177205|ref|NM_145557|ens|ENSMUST00000105576|ens|ENSMUST00000169550	chr4:155500269-155500328	mm|4qE2	GO:0003674(molecular_function)|GO:0005575(cellular_component)|GO:0008150(biological_process)	CTTGTGAGCTCATGCTGGTTAGCAGTCCTGTCTTTGCTCTCCTAAGACTCCAGAAGCCTG	54991	C1orf159	0
A_51_P462862	9430015G10Rik	RIKEN cDNA 9430015G10 gene	Mus musculus RIKEN cDNA 9430015G10 gene (9430015G10Rik), transcript variant 2, mRNA [NM_145557]	NM_145557	NM_145557	230996	chr4	155500803	155500862	+	16152	143	170	A_51_P462862	FALSE	Mm.318925	ENSMUST00000169550		ref|NM_145557|ref|NM_177205|ens|ENSMUST00000169550|ens|ENSMUST00000125786	chr4:155500803-155500862	mm|4qE2	GO:0003674(molecular_function)|GO:0005575(cellular_component)|GO:0008150(biological_process)	AAGTGCCAGTCAAGCACGGCATGGTTTTCAGATAAGACTACATGCATCACTAGGCTTTGA	54991	C1orf159	0
A_52_P336958	9430020K01Rik	RIKEN cDNA 9430020K01 gene	Mus musculus RIKEN cDNA 9430020K01 gene (9430020K01Rik), mRNA [NM_001081963]	NM_001081963	NM_001081963	240185	chr18	4682760	4682819	+	22258	125	93	A_52_P336958	FALSE	Mm.33179	ENSMUST00000037029		ref|NM_001081963|ens|ENSMUST00000037029|ref|XM_006525903|ref|XM_006525904	chr18:004682760-004682819	mm|18qA1	GO:0003674(molecular_function)|GO:0005911(cell-cell junction)|GO:0007155(cell adhesion)|GO:0008150(biological_process)|GO:0030054(cell junction)	TGGGAAACCTCTAAAGATGCAACCAGTTCCTGGGAGGGACCATCAGGATTATTTCCATAA	57608	KIAA1462	0
A_52_P662974	9430021M05Rik	RIKEN cDNA 9430021M05 gene	Mus musculus 12 days embryo embryonic body between diaphragm region and neck cDNA, RIKEN full-length enriched library, clone:9430021M05 product:hypothetical protein, full insert sequence. [AK020430]		AK020430	77288	chr2	162492737	162492796	+	47907	46	292	A_52_P662974	FALSE	Mm.376571			gb|AK020430|tc|TC1630526|riken|9430021M05|nap|NAP078398-1	chr2:162492737-162492796	mm|2qH2	GO:0003674(molecular_function)|GO:0005575(cellular_component)|GO:0008150(biological_process)	TAAAGTCTCTCAGGATTTTCAGCCCTTTTACAAAACCCTTACTACAAATGTGGATCCCAG			0
A_55_P2364703	9430037G07Rik	RIKEN cDNA 9430037G07 gene	Mus musculus RIKEN cDNA 9430037G07 gene (9430037G07Rik), long non-coding RNA [NR_040766]	NR_040766	NR_040766	320692	chr9	88490249	88490190	-	32095	95	99	A_55_P2364703	FALSE	Mm.427378			ref|NR_040766|gb|AK050253|riken|C730031C05|nap|NAP077381-1	chr9:88490249-88490190	mm|9qE3.1		CTCTATTCTCTTTGTAAATACAGGTACAGGATGCTGAAGAAAACCAAAAGCAACGTAATA			0
A_55_P2236228	9430041J12Rik	RIKEN cDNA 9430041J12 gene	Mus musculus 12 days embryo spinal ganglion cDNA, RIKEN full-length enriched library, clone:D130050D15 product:unclassifiable, full insert sequence. [AK051461]		AK051461	77323	chr7	4026164	4026105	-	19066	134	246	A_55_P2236228	FALSE	Mm.378791			gb|AK051461|tc|TC1617877|riken|D130050D15|nap|NAP085561-1	chr7:4026164-4026105	mm|7qA1		TCAGGAAAATGAATGGAACTGGGGATCATTGTATTCAGGGAAATAAGATAGACCCAGAAA			0
A_55_P2319468	9430076C15Rik	RIKEN cDNA 9430076C15 gene	Mus musculus RIKEN cDNA 9430076C15 gene (9430076C15Rik), long non-coding RNA [NR_015553]	NR_015553	NR_015553	320189	chr6	53347149	53347208	+	33168	91	250	A_55_P2319468	FALSE	Mm.227444			ref|NR_015553|gb|AK051275|tc|TC1594359|riken|D130027L12	chr6:53347149-53347208	mm|6qB3	GO:0003674(molecular_function)|GO:0005575(cellular_component)|GO:0008150(biological_process)	ATGAGCCTGGGCATGAACTCTGGAGATGTGATGTGGTCTACTGTCTGGATTCTTTATGAA			0
A_55_P2076826	9430076C15Rik	RIKEN cDNA 9430076C15 gene	Mus musculus mammary gland RCB-0527 Jyg-MC(B) cDNA, RIKEN full-length enriched library, clone:G930038G11 product:similar to Hypothetical 2Fe-2S ferredoxin/zinc finger [Mus musculus], full insert sequence. [AK166503]		AK166503	320189	chr6	53344446	53344505	+	20854	129	277	A_55_P2076826	FALSE	Mm.227444			gb|AK166503|tc|TC1700499|riken|G930038G11	chr6:53344446-53344505	mm|6qB3	GO:0003674(molecular_function)|GO:0005575(cellular_component)|GO:0008150(biological_process)	GAAACACCCTTTGACAGTGATAATGGAGACGACAACCTATTCCTTCCCCCTCCACGGTGA			0
A_55_P2245904	9530003O04Rik	RIKEN cDNA 9530003O04 gene	Mus musculus adult male urinary bladder cDNA, RIKEN full-length enriched library, clone:9530003O04 product:unclassifiable, full insert sequence. [AK020539]		AK020539	77391	chr16	77655624	77655683	+	4870	178	101	A_55_P2245904	FALSE	Mm.184166			gb|AK020539|riken|9530003O04	chr16:77655624-77655683	mm|16qC3.1		AATTCAGGAATGAGAGGATGAGCCATGAATAAACCACAGGAAGATTACTGCAATTCTACT			0
A_55_P2363587	9530004P13Rik	RIKEN cDNA 9530004P13 gene	Mus musculus adult male urinary bladder cDNA, RIKEN full-length enriched library, clone:9530004P13 product:hypothetical protein, full insert sequence. [AK020544]		AK020544	77363	chr8	37710108	37710049	-	62314	3	13	A_55_P2363587	FALSE	Mm.491634			gb|AK020544|gb|XR_168449|tc|NP350267|riken|9530004P13	chr8:37710108-37710049	mm|8qA4	GO:0003674(molecular_function)|GO:0005575(cellular_component)|GO:0008150(biological_process)	GGCCAGCCAGTCAGATTTACAAAGTAAGCAGGTTAGGCCTAATACATGATAAGACCATAG			0
A_55_P2262753	9530053J19Rik	RIKEN cDNA 9530053J19 gene	Mus musculus adult male urinary bladder cDNA, RIKEN full-length enriched library, clone:9530053J19 product:unclassifiable, full insert sequence. [AK035477]		AK035477	53961	chr16	18332902	18332843	-	40666	69	13	A_55_P2262753	FALSE				gb|AK035477|tc|TC1624799|riken|9530053J19	chr16:18332902-18332843	mm|16qA3		ATATTTTAAAGTGTATGTCAAGCAAGAGTGGCCAGAGCTGTTAGGGGAATCTTGGCAGCG			0
A_55_P2360271	9530056K15Rik	RIKEN cDNA 9530056K15 gene	Mus musculus 16 days neonate cerebellum cDNA, RIKEN full-length enriched library, clone:9630002I21 product:unclassifiable, full insert sequence. [AK035765]		AK035765	320650	chr5	144159864	144159923	+	54873	25	136	A_55_P2360271	FALSE	Mm.188979			gb|AK035765|riken|9630002I21	chr5:144159864-144159923	mm|5qG2		TTCACAACCCTCTGGGGTGGATTTTGTGATCTCCTTTTTACAAATAAAAGTCTGAAACTC			0
A_55_P2087205	9530077C14Rik	RIKEN cDNA 9530077C14 gene	Mus musculus adult male urinary bladder cDNA, RIKEN full-length enriched library, clone:9530077C14 product:unclassifiable, full insert sequence. [AK020648]		AK020648	78454	chr4	138748210	138748151	-	56898	19	22	A_55_P2087205	FALSE	Mm.118809			gb|AK020648|tc|TC1662689|riken|9530077C14|nap|NAP078965-1	chr4:138748210-138748151	mm|4qD3	GO:0003674(molecular_function)|GO:0005575(cellular_component)|GO:0008150(biological_process)	CCCGGGTAAGAAGACTAGAACATTTGGGTTCAATAAATGCTGTTTCATATACTTTTTTAC			0
A_55_P2470474	9530082P21Rik	RIKEN cDNA 9530082P21 gene	Mus musculus 0 day neonate lung cDNA, RIKEN full-length enriched library, clone:E030034F15 product:unclassifiable, full insert sequence. [AK087205]		AK087205	638247	chr17	23888115	23888174	+	51398	36	197	A_55_P2470474	FALSE	Mm.382600			gb|AK087205|gb|AK079285|tc|TC1598474|riken|E030034F15	chr17:23888115-23888174	mm|17qA3.3	GO:0003674(molecular_function)|GO:0005575(cellular_component)|GO:0008150(biological_process)	ATACCTTGATTCCCTGAGTACTGGGACTATAGGCACATAGAATTTGAGACCTTGATTCTC			0
A_52_P517011	9530091C08Rik	RIKEN cDNA 9530091C08 gene	Mus musculus RIKEN cDNA 9530091C08 gene (9530091C08Rik), long non-coding RNA [NR_033299]	NR_033299	NR_033299	320440	chr9	68616964	68617023	+	54236	27	98	A_52_P517011	FALSE	Mm.483129			ref|NR_033299|gb|AK046458|riken|B230387F03|nap|NAP122205-001	chr9:68616964-68617023	mm|9qC		GTGAAGGAAGACAAATGTCTCTTTATTCATATCCATGCACTAAGATATAAACAAGCCTGT			0
A_55_P2008121	9630001P10Rik	RIKEN cDNA 9630001P10 gene	Mus musculus 16 days neonate cerebellum cDNA, RIKEN full-length enriched library, clone:9630001P10 product:unclassifiable, full insert sequence. [AK035757]		AK035757	319251	chr5	46033111	46033170	+	61550	5	229	A_55_P2008121	FALSE	Mm.402857			gb|AK035757|tc|TC1628295|riken|9630001P10|nap|NAP078947-1	chr5:46033111-46033170	mm|5qB3	GO:0003674(molecular_function)|GO:0005575(cellular_component)|GO:0008150(biological_process)	CAGTGATTAGAATAGTGTTTAGCAGGCCACTATTAGGTTCTTAAACATTTATTGAACGAC			0
A_55_P2296118	9630010G10Rik	RIKEN cDNA 9630010G10 gene	Mus musculus 16 days neonate cerebellum cDNA, RIKEN full-length enriched library, clone:9630010G10 product:unclassifiable, full insert sequence. [AK035845]		AK035845	399612	chr17	56570073	56570014	-	23506	121	221	A_55_P2296118	FALSE	Mm.403193			gb|AK035845|gb|BB125990|tc|TC1601199|riken|9630010G10	chr17:56570073-56570014	mm|17qD		ATTTTTACTTTTAAAAACACCTGGCATGCGGAGTTGGCTCAGTGGTAGAGGGCTTGCCTA			0
A_66_P135173	9630013A20Rik	RIKEN cDNA 9630013A20 gene	Mus musculus RIKEN cDNA 9630013A20 gene (9630013A20Rik), long non-coding RNA [NR_015539]	NR_015539	NR_015539	319903	chr14	84865112	84865053	-	45349	54	160	A_66_P135173	FALSE	Mm.440481			ref|NR_015539|gb|AK051464|gb|AK043393|gb|AK042724	chr14:84865112-84865053	mm|14qD3		ATGATTTTGCTAGATTTAACTGGGGAGCAATCACTAACAGAATTCCGTGTCACTCTGAAT			0
A_55_P2278895	9630028H03Rik	RIKEN cDNA 9630028H03 gene	Mus musculus 0 day neonate cerebellum cDNA, RIKEN full-length enriched library, clone:C230095N21 product:unclassifiable, full insert sequence. [AK049057]		AK049057	320684	chr2	135151250	135151191	-	61022	6	302	A_55_P2278895	FALSE	Mm.446407			gb|AK049057|riken|C230095N21|nap|NAP084944-1	chr2:135151250-135151191	mm|2qF3		CAGCATAGTTCACGAAAGCATTCTAATTGTGCCCTGCATTTGTTTTAAATAAAAGATGCT			0
A_55_P1998616	9630028I04Rik	RIKEN cDNA 9630028I04 gene	Mus musculus RIKEN cDNA 9630028I04 gene (9630028I04Rik), long non-coding RNA [NR_131118]	NR_131118	NR_131118	319720	chr17	27373619	27373560	-	17607	139	211	A_55_P1998616	FALSE	Mm.394996			ref|NR_131118|gb|AK038843|gb|AK036033|tc|TC1628594	chr17:27373619-27373560	mm|17qA3.3		AAGTGACTTCTGGGTTAAAAGCAGACCCTGTTCTTGCAGAGGGCCTAAATTCAGTTCCTA			0
A_55_P2330435	9630041G16Rik	RIKEN cDNA 9630041G16 gene	Mus musculus 16 days neonate cerebellum cDNA, RIKEN full-length enriched library, clone:9630041G16 product:unclassifiable, full insert sequence. [AK079356]		AK079356	100223	chr4	56970209	56970150	-	40695	68	284	A_55_P2330435	FALSE	Mm.40637	ENSMUST00000053681		gb|AK079356|ens|ENSMUST00000053681|tc|TC1602536|riken|9630041G16	chr4:56970209-56970150	mm|4qB3		CTGAGTGATGATCCTGTTCATTGGCCACCATACATACTTTTATCTTTAGAATGTTAAGTT			0
A_55_P2216079	9630055L06Rik	RIKEN cDNA 9630055L06 gene	Mus musculus 0 day neonate eyeball cDNA, RIKEN full-length enriched library, clone:E130006D24 product:unclassifiable, full insert sequence. [AK053276]		AK053276	319580	chr5	15504818	15504877	+	50938	37	134	A_55_P2216079	FALSE	Mm.446425			gb|AK053276|riken|E130006D24	chr5:15504818-15504877	mm|5qA2		GCCTCACTTTGCCCTTTATACATCTCTATCTAGTTCACTCACCTTATTCTGGTTAATGAA			0
A_52_P421713	9930012K11Rik	RIKEN cDNA 9930012K11 gene	Mus musculus RIKEN cDNA 9930012K11 gene (9930012K11Rik), transcript variant 1, mRNA [NM_001004155]	NM_001004155	NM_001004155	268759	chr14	70554747	70554688	-	3899	181	75	A_52_P421713	FALSE	Mm.12148	ENSMUST00000140314		ref|NM_001004155|ref|NM_001112735|ens|ENSMUST00000140314|ens|ENSMUST00000058240	chr14:070554747-070554688	mm|14qD2	GO:0003674(molecular_function)|GO:0008150(biological_process)	GGCAATGTGAATTGACTTATTTATCAGGTGCTCATAGAGCATGTTTAGTATGGGAGTGTG			0
A_66_P137084	9930014A18Rik	RIKEN cDNA 9930014A18 gene	Mus musculus RIKEN cDNA 9930014A18 gene (9930014A18Rik), long non-coding RNA [NR_030696]	NR_030696	NR_030696	320469	chr15	60660127	60660186	+	29600	102	170	A_66_P137084	FALSE	Mm.230853			ref|NR_030696|gb|AK046554|gb|AK036813|tc|TC1631040	chr15:60660127-60660186	mm|15qD1		TCATTCAACCACAGTAACCCAAATTTCATATTCTCTGCACCTGCTCTAAGAAGAAAGAAA			0
A_55_P1966721	9930105H17Rik	RIKEN cDNA 9930105H17 gene	Mus musculus RIKEN cDNA 9930105H17 gene, mRNA (cDNA clone IMAGE:3587376), containing frame-shift errors. [BC027236]		BC027236	100669	chr10	78777407	78777348	-	50739	38	203	A_55_P1966721	FALSE	Mm.461398			gb|BC027236|gb|AK037062|gb|BB148104|tc|TC1670181	chr10:78777407-78777348	mm|10qC1	GO:0003674(molecular_function)|GO:0005575(cellular_component)|GO:0008150(biological_process)	AACAAGGGCCACAGCAGATGGATGTAACTACAGGGCCTAGACCAGCCTCATTTTAATAAA			0
A_55_P2263098	A130078K24Rik	RIKEN cDNA A130078K24 gene	Mus musculus 16 days neonate thymus cDNA, RIKEN full-length enriched library, clone:A130078K24 product:unclassifiable, full insert sequence. [AK038100]		AK038100	399616	chr14	73099088	73099029	-	16986	141	141	A_55_P2263098	FALSE	Mm.458969			gb|AK038100|gb|BX519179|tc|TC1629216|riken|A130078K24	chr14:73099088-73099029	mm|14qD2		GTGTAGGGAAGTCTTCCATACAGTTGGGTACTCTTAAGTTTCAAATGAACTTAAATATCC			0
A_55_P2280581	A130088B03Rik	RIKEN cDNA A130088B03 gene	Mus musculus 16 days neonate thymus cDNA, RIKEN full-length enriched library, clone:A130088B03 product:unclassifiable, full insert sequence. [AK038224]		AK038224	432971	chr15	85510956	85511015	+	56664	20	161	A_55_P2280581	FALSE	Mm.420353			gb|AK038224|riken|A130088B03|nap|NAP079905-1	chr15:85510956-85511015	mm|15qE2		TATTTATTTTGAGGAGAGGGTCTACTTCACAGTAATGTGCCCAGCCAGTAACTACCTGGC			0
A_55_P2066897	A230045G11Rik	RIKEN cDNA A230045G11 gene	Mus musculus 8 days embryo whole body cDNA, RIKEN full-length enriched library, clone:5730583K23 product:hypothetical protein, full insert sequence. [AK133970]		AK133970	624086	chr17	3114309	3114250	-	53238	30	126	A_55_P2066897	FALSE	Mm.390933			gb|AK133970|tc|TC1628445|tc|TC1662488|riken|5730583K23	chr17:3114309-3114250	mm|17qA1		ATCGGAGCAGAGGGATAATTGCGGGTTTTAGGATCCAGACGTGGTACGGGTGAAAATGCT			0
A_55_P2275354	A230055C15	uncharacterized protein A230055C15	Mus musculus adult male hypothalamus cDNA, RIKEN full-length enriched library, clone:A230055C15 product:unclassifiable, full insert sequence. [AK038688]		AK038688	328113	chr12	67557267	67557208	-	11775	157	67	A_55_P2275354	FALSE	Mm.121286			gb|AK038688|riken|A230055C15|nap|NAP080166-1	chr12:67557267-67557208	mm|12qC2		CTGCAGTGACAGCATCAGGGATTAGTATATACTAGGTGCTCAACTAATATTTGTTAAATT			0
A_55_P2376706	A230057D06Rik	RIKEN cDNA A230057D06 gene	Mus musculus adult male testis cDNA, RIKEN full-length enriched library, clone:4932408B14 product:unclassifiable, full insert sequence. [AK029930]		AK029930	319893	chr7	68849464	68849405	-	49503	42	51	A_55_P2376706	FALSE	Mm.490625			gb|AK029930|riken|4932408B14|nap|NAP073339-1	chr7:68849464-68849405	mm|7qC		GGACCTGTCTCCATTCTCAATTTGAATTCACATTCTCAATAAATCATAAACCAGAAGAGC			0
A_55_P2056821	A330008L17Rik	RIKEN cDNA A330008L17 gene	Mus musculus adult male spinal cord cDNA, RIKEN full-length enriched library, clone:A330008L17 product:hypothetical protein, full insert sequence. [AK039259]		AK039259	234624	chr8	101946243	101946302	+	57020	19	105	A_55_P2056821	FALSE	Mm.124595			gb|AK039259|gb|AK036159|gb|XR_035291|riken|A330008L17	chr8:101946243-101946302	mm|8qD1	GO:0003674(molecular_function)|GO:0005575(cellular_component)|GO:0008150(biological_process)	CGCAGCTCGATTGAGACTCTATGTTTTCATAAAGATGTTGTTAAAACAATCTCTTCTGTA			0
A_55_P2192397	A330023F24Rik	RIKEN cDNA A330023F24 gene	Mus musculus B6-derived CD11 +ve dendritic cells cDNA, RIKEN full-length enriched library, clone:F730115K06 product:hypothetical protein, full insert sequence. [AK171382]		AK171382	320977	chr1	196853519	196853578	+	23350	121	206	A_55_P2192397	FALSE	Mm.99905			gb|AK171382|riken|F730115K06	chr1:196853519-196853578	mm|1qH6		ATTTCTGTCATGTTAGCACTCAGGAGGCTAAAGTAGGAGAGTTGAGTTCTAAGCTGGCCT			0
A_55_P2244941	A330074H02Rik	RIKEN cDNA A330074H02 gene	Mus musculus adult male spinal cord cDNA, RIKEN full-length enriched library, clone:A330074H02 product:unclassifiable, full insert sequence. [AK039621]		AK039621	402758	chr7	86656210	86656269	+	54677	26	199	A_55_P2244941	FALSE				gb|AK039621|riken|A330074H02	chr7:86656210-86656269	mm|7qD3		TTCTCGGAATCGGGTTAATTTTCCCTTGGCTAATCCTCAAACCCATTAAGTTCTCCTCTC			0
A_55_P2269154	A330093E20Rik	RIKEN cDNA A330093E20 gene	Mus musculus RIKEN cDNA A330093E20 gene (A330093E20Rik), long non-coding RNA [NR_040342]	NR_040342	NR_040342	107003	chr18	45843256	45843197	-	30523	99	292	A_55_P2269154	FALSE	Mm.395148			ref|NR_040342|gb|AK039712|tc|TC1607226|riken|A330093E20	chr18:45843256-45843197	mm|18qC		GTGAGAGAAAGAGAGCGCACAGATTTTAGCTTAGAATATAATTTCTGGGATTTTTAAACC			0
A_55_P2178972	A430027H14Rik	RIKEN cDNA A430027H14 gene	Mus musculus 0 day neonate thymus cDNA, RIKEN full-length enriched library, clone:A430027H14 product:potassium channel, subfamily K, member 2, full insert sequence. [AK039909]		AK039909	319980	chr1	191168619	191168678	+	43669	59	240	A_55_P2178972	FALSE	Mm.387016			gb|AK039909|gb|XR_168796|gb|BB522533|tc|TC1622304	chr1:191168619-191168678	mm|1qH6		CAGCCTTGGCTGTAATGTGAACCTCTTAGGTCGTTTACAAGACTCTCCAACATCAATGAT			0
A_55_P2346736	A430105D02Rik	RIKEN cDNA A430105D02 gene	Mus musculus 0 day neonate thymus cDNA, RIKEN full-length enriched library, clone:A430105D02 product:hypothetical protein, full insert sequence. [AK020766]		AK020766	77188	chr1	55066164	55066105	-	25803	114	219	A_55_P2346736	FALSE	Mm.446910			gb|AK020766|riken|A430105D02	chr1:55066164-55066105	mm|1qC1.2		CCATATAGAAGTTTAGTGAGCTTTGTAGACTTTTTAGGCCTGGTTATTCTGGTTATTTTG			0
A_66_P130310	A4galt	alpha 1,4-galactosyltransferase	Mus musculus alpha 1,4-galactosyltransferase (A4galt), transcript variant 1, mRNA [NM_001170954]	NM_001170954	NM_001170954	239559	chr15	83057251	83057192	-	10827	159	324	A_66_P130310	FALSE	Mm.323805	ENSMUST00000164614		ref|NM_001170954|ref|NM_001004150|ens|ENSMUST00000164614|ens|ENSMUST00000049530	chr15:083057251-083057192	mm|15qE1	GO:0001576(globoside biosynthetic process)|GO:0005794(Golgi apparatus)|GO:0006629(lipid metabolic process)|GO:0007009(plasma membrane organization)|GO:0008378(galactosyltransferase activity)|GO:0015643(toxin binding)|GO:0016020(membrane)|GO:0016021(integral to membrane)|GO:0016740(transferase activity)|GO:0016757(transferase activity, transferring glycosyl groups)|GO:0050512(lactosylceramide 4-al…	GGTTTGTGGAAATCCTTTAGGTTTTAAAAAAGGAAAAAGAGTTTTAAACTCCCTCCCTGT	53947	A4GALT	0
A_55_P2312124	A530028O18	uncharacterized protein A530028O18	Mus musculus adult male aorta and vein cDNA, RIKEN full-length enriched library, clone:A530028O18 product:unclassifiable, full insert sequence. [AK040831]		AK040831	328373	chr14	32343874	32343815	-	45971	52	228	A_55_P2312124	FALSE	Mm.404149			gb|AK040831|gb|BB215694|tc|TC1605522|riken|A530028O18	chr14:32343874-32343815	mm|14qB		AGGATTGCTTAAATCCAAGAGTTCAAGACCAGGCTAGGCAATTTAGTCAGACTTCATATC			0
A_52_P373575	A530058N18Rik	RIKEN cDNA A530058N18 gene	Mus musculus RIKEN cDNA A530058N18 gene (A530058N18Rik), long non-coding RNA [NR_028423]	NR_028423	NR_028423	320846	chr2	113857267	113857326	+	45844	53	153	A_52_P373575	FALSE	Mm.441458			ref|NR_028423|gb|AK046235|gb|AK043120|gb|AK045761	chr2:113857267-113857326	mm|2qE4	GO:0003674(molecular_function)|GO:0005575(cellular_component)|GO:0008150(biological_process)	TGGTTGAAAATGACTAGCATATTATGTCTGTGAAATTCAGTAAAGGGGAATATGGAAGAG			0
A_55_P2200319	A630014C17Rik	RIKEN cDNA A630014C17 gene	Mus musculus 3 days neonate thymus cDNA, RIKEN full-length enriched library, clone:A630014C17 product:unclassifiable, full insert sequence. [AK041482]		AK041482	399633	chr11	52099621	52099680	+	46700	50	82	A_55_P2200319	FALSE	Mm.439892			gb|AK041482|gb|XR_106224|tc|TC1628843|riken|A630014C17	chr11:52099621-52099680	mm|11qB1.3		GCTGTGTGACACATGCAGACATACTGAGGAACTAGCTATCAGTAATAAAAATTACTAAAC			0
A_55_P2249556	A630081D01Rik	RIKEN cDNA A630081D01 gene	Mus musculus 3 days neonate thymus cDNA, RIKEN full-length enriched library, clone:A630081D01 product:unclassifiable, full insert sequence. [AK042310]		AK042310	98754	chr1	80743869	80743810	-	9083	165	203	A_55_P2249556	FALSE	Mm.404411			gb|AK042310|gb|BB240235|tc|TC1641394|riken|A630081D01	chr1:80743869-80743810	mm|1qC4		TCAGTCATAGAGCATCCTTTAAAGGACTCTGAAGGTTCATGGTCTCGGGAAAACCCCTAT			0
A_55_P2018181	A730008H23Rik	RIKEN cDNA A730008H23 gene	Mus musculus RIKEN cDNA A730008H23 gene (A730008H23Rik), mRNA [NM_172505]	NM_172505	NM_172505	212427	chr1	90161462	90161403	-	54962	25	285	A_55_P2018181	FALSE	Mm.384762			ref|NM_172505|gb|AK042589|gb|AK032612|gb|BC100379	chr1:090161462-090161403	mm|1qD		TTATTCAGGGGATTCTCAGTGGCAGTTTTCCTCTTAACATGAATTACTTACAGTGTCTCT	55355	HJURP	0
A_55_P2189903	A730011C13Rik	RIKEN cDNA A730011C13 gene	Mus musculus 9 days embryo whole body cDNA, RIKEN full-length enriched library, clone:D030005C14 product:unclassifiable, full insert sequence. [AK083419]		AK083419	319916	chr3	94798447	94798388	-	1993	186	280	A_55_P2189903	FALSE	Mm.441061			gb|AK083419|gb|XR_107520|riken|D030005C14|nap|NAP021493-001	chr3:94798447-94798388	mm|3qF2.1	GO:0003674(molecular_function)|GO:0005575(cellular_component)|GO:0008150(biological_process)	TCATACCCCTTACTATGTACAATATTCATGCAAATTTGTGCCTCGCTCTGTTAACAGGTG			0
A_55_P2148931	A730017C20Rik	RIKEN cDNA A730017C20 gene	Mus musculus RIKEN cDNA A730017C20 gene (A730017C20Rik), transcript variant 2, mRNA [NM_001167925]	NM_001167925	NM_001167925	225583	chr18	59235419	59235478	+	19586	133	189	A_55_P2148931	FALSE	Mm.209711			ref|NM_001167925|ref|NM_173759|ref|NR_033764|ref|NR_033765	chr18:059235419-059235478	mm|18qD3	GO:0003674(molecular_function)|GO:0005575(cellular_component)|GO:0008150(biological_process)|GO:0016020(membrane)|GO:0016021(integral to membrane)	CTAAAATGCCTTCTAAGTACTTGCAAGAGAATCTGTCTGTGCATTGTGAACGTCCGCATT	100127206	KIAA1024L	0
A_66_P124669	A730020E08Rik	RIKEN cDNA A730020E08 gene	Mus musculus 7 days neonate cerebellum cDNA, RIKEN full-length enriched library, clone:A730020E08 product:unclassifiable, full insert sequence. [AK042736]		AK042736	100504262	chr6	61124095	61124036	-	39649	72	79	A_66_P124669	FALSE				gb|AK042736|riken|A730020E08|nap|NAP023464-001	chr6:61124095-61124036	mm|6qB3	GO:0003674(molecular_function)|GO:0005575(cellular_component)|GO:0008150(biological_process)	AGCGCTGTATTCAGGACAAGGAGTGATTTTATCACGTAAATTCAGTCTTTTATTCACAAT			0
A_55_P2223592	A730062M13Rik	RIKEN cDNA A730062M13 gene	Mus musculus 7 days neonate cerebellum cDNA, RIKEN full-length enriched library, clone:A730062M13 product:unclassifiable, full insert sequence. [AK043165]		AK043165	403346	chr9	72719309	72719368	+	6959	171	188	A_55_P2223592	FALSE				gb|AK043165|riken|A730062M13	chr9:72719309-72719368	mm|9qD		TGTCTAGTTAATCAAACAAGCTGTGGTGTGTAAGCAGAAGCCTGGTGTCCTAGCTACTTT			0
A_55_P2190232	A730063M14Rik	RIKEN cDNA A730063M14 gene	Mus musculus 7 days neonate cerebellum cDNA, RIKEN full-length enriched library, clone:A730063M14 product:unclassifiable, full insert sequence. [AK080508]		AK080508	100504703	chr10	126511749	126511808	+	14530	148	134	A_55_P2190232	FALSE	Mm.387029			gb|AK080508|tc|TC1619348|riken|A730063M14|nap|NAP121457-002	chr10:126511749-126511808	mm|10qD3		CCTCTGTGGTGACAGACCAAGTAATTGTATATGGATTTCTGTGGTTTTCTTTTTAAAAGA			0
A_55_P2330215	A730090N16Rik	RIKEN cDNA A730090N16 gene	Mus musculus RIKEN cDNA A730090N16 gene (A730090N16Rik), long non-coding RNA [NR_040390]	NR_040390	NR_040390	319798	chr3	65128103	65128044	-	24069	119	80	A_55_P2330215	FALSE	Mm.445698			ref|NR_040390|gb|AK085325|tc|TC1599717|riken|D630011P15	chr3:65128103-65128044	mm|3qE1		GAAAGAATAATGAAAGTTAGAGCCAGATGCACTGACCAGTTGTAGGTACATGATATATAT			0
A_55_P2290779	A830009L08Rik	RIKEN cDNA A830009L08 gene	Mus musculus RIKEN cDNA A830009L08 gene (A830009L08Rik), long non-coding RNA [NR_045161]	NR_045161	NR_045161	320297	chr13	91508655	91508596	-	18411	136	244	A_55_P2290779	FALSE	Mm.375866			ref|NR_045161|gb|AK043578|riken|A830009L08|nap|NAP122610-001	chr13:91508655-91508596	mm|13qC3	GO:0003674(molecular_function)|GO:0005575(cellular_component)|GO:0008150(biological_process)	GTATGCATGGTTCATACAGTTGGGTTTATTTACAAATAAAACTAGTTGGCGTTTCTGTCT			0
A_52_P59400	A830018L16Rik	RIKEN cDNA A830018L16 gene	Mus musculus RIKEN cDNA A830018L16 gene (A830018L16Rik), transcript variant 2, mRNA [NM_177173]	NM_177173	NM_177173	320492	chr1	11502028	11502087	+	21163	128	315	A_52_P59400	FALSE	Mm.52021			ref|NM_177173|ref|NM_001160369|ref|NM_001160371|ref|NM_001160370	chr1:011502028-011502087	mm|1qA2	GO:0003674(molecular_function)|GO:0005575(cellular_component)|GO:0008150(biological_process)	ACCTGACCAGCCAATTCCATTTCTCATTGACCATCTTCAATCTAAACAAGGAAACCAAGG	116328	C8orf34	0
A_52_P460704	A830018L16Rik	RIKEN cDNA A830018L16 gene	Mus musculus RIKEN cDNA A830018L16 gene (A830018L16Rik), transcript variant 2, mRNA [NM_177173]	NM_177173	NM_177173	320492	chr1	11965783	11965842	+	59653	11	87	A_52_P460704	FALSE	Mm.52021	ENSMUST00000048613		ref|NM_177173|ref|NM_001160369|ens|ENSMUST00000048613|ref|XM_006495539	chr1:011965783-011965842	mm|1qA2	GO:0003674(molecular_function)|GO:0005575(cellular_component)|GO:0008150(biological_process)	AAGAAACAATTGTTAAAGACTCGACCATAGCTAAGGAATAAACAAGCAGTTTCTGACTTC	116328	C8orf34	0
A_55_P2238079	A830054O07Rik	RIKEN cDNA A830054O07 gene	Mus musculus 13 days embryo forelimb cDNA, RIKEN full-length enriched library, clone:5930437J24 product:unclassifiable, full insert sequence. [AK031253]		AK031253	320238	chr1	167813631	167813572	-	50587	38	180	A_55_P2238079	FALSE				gb|AK031253|tc|TC1598952|riken|5930437J24|nap|NAP015714-001	chr1:167813631-167813572	mm|1qH2.3		ATAGTGGTTGAATGATGCTGAAATTGGAGATGCCTAGAATATGGATAGTATATTACAACC			0
A_55_P2202598	A930004J17Rik	RIKEN cDNA A930004J17 gene	Mus musculus adult retina cDNA, RIKEN full-length enriched library, clone:A930004J17 product:unclassifiable, full insert sequence. [AK044267]		AK044267	319635	chr4	131434614	131434555	-	49582	41	222	A_55_P2202598	FALSE	Mm.442403			gb|AK044267|tc|TC1599283|riken|A930004J17|nap|NAP124452-1	chr4:131434614-131434555	mm|4qD2.3		ATTCACAAAGCCAGACAGACCAGACTTTTAGGCAAACAGGCAATAATGTGCCACCTGATC			0
A_66_P124969	A930009A15Rik	RIKEN cDNA A930009A15 gene	Mus musculus RIKEN cDNA A930009A15 gene (A930009A15Rik), mRNA [NM_029982]	NM_029982	NM_029982	77798	chr10	115019404	115019463	+	23510	121	213	A_66_P124969	FALSE	Mm.446685	ENSMUST00000173620		ref|NM_029982|ens|ENSMUST00000173620|ref|XM_006514319|gb|AK020834	chr10:115019404-115019463	mm|10qD2	GO:0003674(molecular_function)|GO:0005575(cellular_component)|GO:0008150(biological_process)	AGGGAAGAGAAGATGTTTACATAGAAATGTGACATTTGGCGTTATTTCACATTTGTGCAA			0
A_55_P2344753	A930009L07Rik	RIKEN cDNA A930009L07 gene	Mus musculus adult retina cDNA, RIKEN full-length enriched library, clone:A930009L07 product:unclassifiable, full insert sequence. [AK044369]		AK044369	402733	chr15	72338337	72338278	-	33348	91	217	A_55_P2344753	FALSE	Mm.184971			gb|AK044369|gb|AK039650|tc|TC1759047|tc|TC1629373	chr15:72338337-72338278	mm|15qD3		ATTTTGCACAAGATGAGGACCTTTGGTTTGGATGATCTGGTCACACATGAAGATTGATCC			0
A_52_P425004	A930017M01Rik	Smg-5 homolog, nonsense mediated mRNA decay factor pseudogene	Mus musculus RIKEN cDNA A930017M01 gene (A930017M01Rik), non-coding RNA [NR_033609]	NR_033609	NR_033609	239410	chr15	44715776	44715835	+	3368	182	154	A_52_P425004	FALSE	Mm.352401			ref|NR_033609|gb|AK080719|tc|TC1586295|riken|A930017M01	chr15:44715776-44715835	mm|15qB3.3		GTTCTGGGGATGGCAACTGAAGCAGGTGTGGAAATCAAGAACATTCTGAGTTTCCACAAA			0
A_55_P2197134	A930018M24Rik	RIKEN cDNA A930018M24 gene	Mus musculus adult male diencephalon cDNA, RIKEN full-length enriched library, clone:9330167E06 product:unclassifiable, full insert sequence. [AK034241]		AK034241	328399	chr14	51513377	51513318	-	27185	110	79	A_55_P2197134	FALSE	Mm.285300			gb|AK034241|riken|9330167E06	chr14:51513377-51513318	mm|14qC1	GO:0003674(molecular_function)|GO:0005575(cellular_component)|GO:0008150(biological_process)	TATTGGTAGTCATGTCAGTAAGTCCCAGATTAGCCAACACTACATCGTGAGATCCCGTCT			0
A_55_P2263277	A930019D19Rik	RIKEN cDNA A930019D19 gene	Mus musculus RIKEN cDNA A930019D19 gene (A930019D19Rik), long non-coding RNA [NR_040619]	NR_040619	NR_040619	77806	chr2	146092807	146092866	+	25967	113	220	A_55_P2263277	FALSE	Mm.392819			ref|NR_040619|gb|AK020875|tc|TC1621358|riken|A930019D19	chr2:146092807-146092866	mm|2qG1		GATTAAATAGGAATACATGTGGACTTCTAGCTCTATCATCAGCTTGCTACGTGAAAAATT			0
A_55_P2359436	A930026B05Rik	RIKEN cDNA A930026B05 gene	Mus musculus adult retina cDNA, RIKEN full-length enriched library, clone:A930026B05 product:unclassifiable, full insert sequence. [AK020890]		AK020890	77956	chr6	72325983	72325924	-	26082	113	317	A_55_P2359436	FALSE	Mm.442925			gb|AK020890|riken|A930026B05|nap|NAP076380-1	chr6:72325983-72325924	mm|6qC1		CACACTGTACACATACACATGTGCAGGGAAAACACTCACTCACGTAAAGTAAATAAATCT			0
A_55_P2331332	A930033C23Rik	RIKEN cDNA A930033C23 gene	Mus musculus adult retina cDNA, RIKEN full-length enriched library, clone:A930033C23 product:hypothetical protein, full insert sequence. [AK020921]		AK020921	77965	chr5	35739527	35739468	-	17827	138	100	A_55_P2331332	FALSE	Mm.447300			gb|AK020921|riken|A930033C23|nap|NAP022914-001	chr5:35739527-35739468	mm|5qB3		AGTTTTAAGTGAACCCAGGTGAGACTCAGATTGGGTGAAAATAAAATTGGAACGTACTGC			0
A_66_P103493	AA387883	expressed sequence AA387883	Mus musculus expressed sequence AA387883 (AA387883), long non-coding RNA [NR_030678]	NR_030678	NR_030678	100043450	chr19	53001312	53001371	+	50638	38	78	A_66_P103493	FALSE	Mm.145594			ref|NR_030678|gb|AK043996|riken|A830077F18	chr19:53001312-53001371	mm|19qD2		CAGGTTGACTATCCCAGGGCTGACGTTCATTTCAAAGATTCCCAGATTCCACGGGCCATA			0
A_55_P2019118	AA414768	expressed sequence AA414768	Mus musculus expressed sequence AA414768 (AA414768), mRNA [NM_001272033]	NM_001272033	NM_001272033	245350	chrX	12515542	12515601	+	39478	72	94	A_55_P2019118	FALSE	Mm.302695			ref|NM_001272033|tc|TC1621991|nap|NAP013893-001	chrX:012515542-012515601	mm|XqA1.1		CAGTTGTGACTTTATAATTTTTGTTTATTGGGCTATTGGGGGAGGGGGGATAATGAGTAT			0
A_55_P2044054	AA465934	expressed sequence AA465934	BB850827 RIKEN full-length enriched, adult inner ear Mus musculus cDNA clone F930109H13 5', mRNA sequence [BB850827]		BB850827	613254	chr11	83105675	83105734	+	60404	8	226	A_55_P2044054	FALSE	Mm.383758			gb|BB850827|tc|TC1684997	chr11:83105675-83105734	mm|11qC		ATTGAACCCTTTTGTTCCAGGCTGTTAACACGCTTCCCCAGTTCTTTAGGAACTCAGTGA			0
A_55_P2137049	AA467197	expressed sequence AA467197	Mus musculus expressed sequence AA467197 (AA467197), mRNA [NM_001004174]	NM_001004174	NM_001004174	433470	chr2	122466640	122466699	+	19015	135	19	A_55_P2137049	FALSE	Mm.36783	ENSMUST00000110512		ref|NM_001004174|ens|ENSMUST00000110512|ens|ENSMUST00000047498|ref|XM_006499873	chr2:122466640-122466699	mm|2qE5	GO:0003674(molecular_function)|GO:0005634(nucleus)|GO:0005739(mitochondrion)|GO:0008150(biological_process)	CTGCATTAGCAAGTGAAGGTAGCACATAGTCTAAAATAGTTTTCTGTGTTTATTGGTGTA	84419	C15orf48	0
A_55_P2294074	AA536887	expressed sequence AA536887	AGENCOURT_11258496 NIH_MGC_135 Mus musculus cDNA clone IMAGE:30135500 5', mRNA sequence [CB196702]		CB196702	101458	chr7	144478538	144478479	-	9220	164	258	A_55_P2294074	FALSE	Mm.441567			gb|CB196702|tc|TC1659663	chr7:144478538-144478479	mm|7qF4		ATCAAGTAATCCTGATTAGCAATCTCACTGTACCCAGTCAAGAGTGAAATGCAGCCCAGC			0
A_55_P1968898	AA645497	expressed sequence AA645497	Mus musculus 8 days neonate male testis cDNA, RIKEN full-length enriched library, clone:G630027G22 product:hypothetical Glycine-rich region profile containing protein, full insert sequence. [AK144341]		AK144341	100499479	chr12	84974676	84974735	+	23771	120	20	A_55_P1968898	FALSE	Mm.451056			gb|AK144341|gb|BB800065|riken|G630027G22	chr12:84974676-84974735	mm|12qD1		CTTCACAGGTTGGACTTTGGGACTGGAAAAAATGTATGTAAAATGCTCACTAAAATTTTG			0
A_55_P2323503	AA960618	expressed sequence AA960618	uq33g02.y1 NCI_CGAP_Mam5 Mus musculus cDNA clone IMAGE:2811218 5'. [AW258355]		AW258355	101477	chr7	107617166	107617225	+	15042	147	93	A_55_P2323503	FALSE	Mm.436970			gb|AW258355	chr7:107617166-107617225	mm|7qE3		GGTTAGGAAACTAGCACCCAAGCAGCAGAGAGGACACAAGCTCATTCCCCTTACCCCATT			0
A_52_P301374	Aaas	achalasia, adrenocortical insufficiency, alacrimia	Mus musculus achalasia, adrenocortical insufficiency, alacrimia (Aaas), mRNA [NM_153416]	NM_153416	NM_153416	223921	chr15	102168931	102168872	-	12615	154	28	A_52_P301374	FALSE	Mm.352946	ENSMUST00000041208		ref|NM_153416|ens|ENSMUST00000041208|gb|AK087134|gb|AK169523	chr15:102168931-102168872	mm|15qF3	GO:0003674(molecular_function)|GO:0005634(nucleus)|GO:0005643(nuclear pore)|GO:0005654(nucleoplasm)|GO:0005737(cytoplasm)|GO:0005813(centrosome)|GO:0006810(transport)|GO:0006913(nucleocytoplasmic transport)|GO:0007612(learning)|GO:0009566(fertilization)|GO:0015031(protein transport)|GO:0016020(membrane)|GO:0031965(nuclear membrane)|GO:0051028(mRNA transport)	GTCCACAGGCCGAATCACCCACATACCTCTGTACTTTGTCAATGCTCAGTTTCCACGCTT	8086	AAAS	0
A_55_P1970578	Aamdc	adipogenesis associated Mth938 domain containing	Mus musculus adipogenesis associated Mth938 domain containing (Aamdc), transcript variant 1, mRNA [NM_001177945]	NM_001177945	NM_001177945	66273	chr7	104706714	104706655	-	58242	15	285	A_55_P1970578	FALSE	Mm.41583	ENSMUST00000154779		ref|NM_001177945|ref|NM_183251|ens|ENSMUST00000154779|ens|ENSMUST00000126085	chr7:104706714-104706655	mm|7qE2	GO:0003674(molecular_function)|GO:0005737(cytoplasm)|GO:0043066(negative regulation of apoptotic process)|GO:0045600(positive regulation of fat cell differentiation)|GO:0045944(positive regulation of transcription from RNA polymerase II promoter)	CAGATGTAAAGGAAGTTGCTGAGAAAGGGGTACAGACTCTTGTGATTGGCAGAGGAATGA	28971	AAMDC	0
A_51_P483544	Aass	aminoadipate-semialdehyde synthase	Mus musculus aminoadipate-semialdehyde synthase (Aass), mRNA [NM_013930]	NM_013930	NM_013930	30956	chr6	23022727	23022668	-	18790	135	142	A_51_P483544	FALSE	Mm.18651	ENSMUST00000031707		ref|NM_013930|ens|ENSMUST00000031707|gb|AJ224761|gb|AK136216	chr6:023022727-023022668	mm|6qA3.1	GO:0003824(catalytic activity)|GO:0005739(mitochondrion)|GO:0006091(generation of precursor metabolites and energy)|GO:0008152(metabolic process)|GO:0016491(oxidoreductase activity)|GO:0019477(L-lysine catabolic process)|GO:0043231(intracellular membrane-bounded organelle)|GO:0047130(saccharopine dehydrogenase (NADP+, L-lysine-forming) activity)|GO:0047131(saccharopine dehydrogenase (NAD+, L-glut…	TATTGTGCTTCCTTTTCCCCGAGAACATATTATCAGCAAGTGCAGTTGTACTACTTCCTT	10157	AASS	0
A_55_P2042156	Aatk	apoptosis-associated tyrosine kinase	Mus musculus apoptosis-associated tyrosine kinase (Aatk), transcript variant 1, mRNA [NM_007377]	NM_007377	NM_007377	11302	chr11	119868753	119868694	-	62517	2	263	A_55_P2042156	FALSE	Mm.6826	ENSMUST00000103020		ref|NM_007377|ref|NM_001198785|ref|NM_001198787|ens|ENSMUST00000103020	chr11:119868753-119868694	mm|11qE2	GO:0000166(nucleotide binding)|GO:0004672(protein kinase activity)|GO:0004674(protein serine/threonine kinase activity)|GO:0004713(protein tyrosine kinase activity)|GO:0005515(protein binding)|GO:0005524(ATP binding)|GO:0005622(intracellular)|GO:0005737(cytoplasm)|GO:0005783(endoplasmic reticulum)|GO:0006468(protein phosphorylation)|GO:0006915(apoptotic process)|GO:0007420(brain development)|GO:0…	TTGGGGGTGGGGGCAATGTTTTCTGTTTTGTTTTTGTTTCTGTTTTTAGTTTGAGGCTTA	9625	AATK	0
A_55_P2066778	AB124611	cDNA sequence AB124611	Mus musculus cDNA sequence AB124611 (AB124611), transcript variant 2, mRNA [NM_206536]	NM_206536	NM_206536	382062	chr9	21333443	21333502	+	56561	20	40	A_55_P2066778	FALSE	Mm.325205	ENSMUST00000173769		ref|NM_206536|ref|NM_001198794|ens|ENSMUST00000173769|ens|ENSMUST00000076326	chr9:021333443-021333502	mm|9qA3	GO:0003674(molecular_function)|GO:0005575(cellular_component)|GO:0008150(biological_process)|GO:0016020(membrane)|GO:0016021(integral to membrane)	TTCTGCTGTCAATATGGTGTGATGGGTGAGCACAGTCAGCCCCAGCTGTCGGACTTCAGC	255809	C19orf38	0
A_55_P2021177	Abca2	ATP-binding cassette, sub-family A (ABC1), member 2	Mus musculus ATP-binding cassette, sub-family A (ABC1), member 2 (Abca2), mRNA [NM_007379]	NM_007379	NM_007379	11305	chr2	25302851	25302910	+	32952	92	26	A_55_P2021177	FALSE	Mm.2210	ENSMUST00000102919		ref|NM_007379|ens|ENSMUST00000102919|ref|XM_006497613|ref|XM_006497615	chr2:025302851-025302910	mm|2qA3	GO:0000166(nucleotide binding)|GO:0005215(transporter activity)|GO:0005524(ATP binding)|GO:0005764(lysosome)|GO:0005765(lysosomal membrane)|GO:0005768(endosome)|GO:0005815(microtubule organizing center)|GO:0006357(regulation of transcription from RNA polymerase II promoter)|GO:0006810(transport)|GO:0006869(lipid transport)|GO:0008203(cholesterol metabolic process)|GO:0016020(membrane)|GO:0016021(…	ATTGGTGGCTGATGAGCCAGAGGACCTGGACACAGAGGATGAAGGCCTCATCAGCTTCGA	20	ABCA2	0
A_52_P485007	Abca2	ATP-binding cassette, sub-family A (ABC1), member 2	Mus musculus ATP-binding cassette, sub-family A (ABC1), member 2 (Abca2), mRNA [NM_007379]	NM_007379	NM_007379	11305	chr2	25303705	25303764	+	41485	66	16	A_52_P485007	FALSE	Mm.2210	ENSMUST00000102919		ref|NM_007379|ens|ENSMUST00000102919|ref|XM_006497613|ref|XM_006497615	chr2:025303705-025303764	mm|2qA3	GO:0000166(nucleotide binding)|GO:0005215(transporter activity)|GO:0005524(ATP binding)|GO:0005764(lysosome)|GO:0005765(lysosomal membrane)|GO:0005768(endosome)|GO:0005815(microtubule organizing center)|GO:0006357(regulation of transcription from RNA polymerase II promoter)|GO:0006810(transport)|GO:0006869(lipid transport)|GO:0008203(cholesterol metabolic process)|GO:0016020(membrane)|GO:0016021(…	CGCAAGTCTACCCAGGCCAGCATCTTGCACAGATGTCTTTTCATGGACACCCTTGACTGC	20	ABCA2	0
A_52_P508920	Abca6	ATP-binding cassette, sub-family A (ABC1), member 6	Mus musculus ATP-binding cassette, sub-family A (ABC1), member 6 (Abca6), transcript variant 1, mRNA [NM_147218]	NM_147218	NM_147218	76184	chr11	110041623	110041564	-	10783	160	83	A_52_P508920	FALSE	Mm.159704	ENSMUST00000044003		ref|NM_147218|ens|ENSMUST00000044003|gb|BC132417|gb|BC132419	chr11:110041623-110041564	mm|11qE1	GO:0000166(nucleotide binding)|GO:0003674(molecular_function)|GO:0005215(transporter activity)|GO:0005524(ATP binding)|GO:0005575(cellular_component)|GO:0006810(transport)|GO:0006869(lipid transport)|GO:0008150(biological_process)|GO:0016020(membrane)|GO:0016021(integral to membrane)|GO:0016887(ATPase activity)|GO:0042626(ATPase activity, coupled to transmembrane movement of substances)|GO:004323…	CTCAGAGTGAAGGATGTTTCTCAAGAGCCATTAGTTCACAGGGAGATTTTGAAGCTCTTC	23460	ABCA6	0
A_51_P374869	Abca7	ATP-binding cassette, sub-family A (ABC1), member 7	Mus musculus ATP-binding cassette, sub-family A (ABC1), member 7 (Abca7), mRNA [NM_013850]	NM_013850	NM_013850	27403	chr10	79478237	79478296	+	15587	145	315	A_51_P374869	FALSE	Mm.103351	ENSMUST00000171637		ref|NM_013850|ens|ENSMUST00000171637|ens|ENSMUST00000043866|ens|ENSMUST00000132517	chr10:079478237-079478296	mm|10qC1	GO:0000166(nucleotide binding)|GO:0001891(phagocytic cup)|GO:0005215(transporter activity)|GO:0005515(protein binding)|GO:0005524(ATP binding)|GO:0005548(phospholipid transporter activity)|GO:0005622(intracellular)|GO:0005737(cytoplasm)|GO:0005768(endosome)|GO:0005794(Golgi apparatus)|GO:0005886(plasma membrane)|GO:0005887(integral to plasma membrane)|GO:0006810(transport)|GO:0006909(phagocytosis…	AGACAGAGGATCTCTGTACCATACGCTGGCTCCCAGAAAGCCTTGGGCTCTGGGGGAAAT	10347	ABCA7	0
A_55_P2102769	Abca8a	ATP-binding cassette, sub-family A (ABC1), member 8a	Mus musculus ATP-binding cassette, sub-family A (ABC1), member 8a (Abca8a), mRNA [NM_153145]	NM_153145	NM_153145	217258	chr11	109945550	109945491	-	31919	95	124	A_55_P2102769	FALSE	Mm.344148	ENSMUST00000106664		ref|NM_153145|ens|ENSMUST00000106664|ens|ENSMUST00000106662|ens|ENSMUST00000046223	chr11:109945550-109945491	mm|11qE1	GO:0000166(nucleotide binding)|GO:0005215(transporter activity)|GO:0005524(ATP binding)|GO:0005575(cellular_component)|GO:0005743(mitochondrial inner membrane)|GO:0005886(plasma membrane)|GO:0006810(transport)|GO:0006869(lipid transport)|GO:0008150(biological_process)|GO:0016020(membrane)|GO:0016021(integral to membrane)|GO:0016887(ATPase activity)|GO:0042626(ATPase activity, coupled to transmemb…	TATTGTGGCCTTTCAGAATTCTGGAGAGATGGGTTTGTGGCTCTTCAAGCTGCCATTAAC			0
A_55_P1953846	Abca8b	ATP-binding cassette, sub-family A (ABC1), member 8b	Mus musculus ATP-binding cassette, sub-family A (ABC1), member 8b (Abca8b), mRNA [NM_013851]	NM_013851	NM_013851	27404	chr11	109795648	109795589	-	57379	18	43	A_55_P1953846	FALSE	Mm.341004	ENSMUST00000106669		ref|NM_013851|ens|ENSMUST00000106669|ref|XM_006533459|ref|XM_006533460	chr11:109795648-109795589	mm|11qE1	GO:0000166(nucleotide binding)|GO:0005215(transporter activity)|GO:0005524(ATP binding)|GO:0005743(mitochondrial inner membrane)|GO:0005886(plasma membrane)|GO:0006810(transport)|GO:0006869(lipid transport)|GO:0016020(membrane)|GO:0016021(integral to membrane)|GO:0016887(ATPase activity)|GO:0042626(ATPase activity, coupled to transmembrane movement of substances)|GO:0043231(intracellular membrane…	CACATCCCTTTAGGACACTTATAGCCATAGTTCTGTAGAATGTTGAATAAACAGTTACTT	10351	ABCA8	0
A_55_P2062981	Abca9	ATP-binding cassette, sub-family A (ABC1), member 9	Mus musculus ATP-binding cassette, sub-family A (ABC1), member 9 (Abca9), mRNA [NM_147220]	NM_147220	NM_147220	217262	chr11	109962195	109962136	-	41832	65	305	A_55_P2062981	FALSE	Mm.291459	ENSMUST00000044850		ref|NM_147220|ens|ENSMUST00000044850|gb|AF491299|gb|AK029256	chr11:109962195-109962136	mm|11qE1	GO:0000166(nucleotide binding)|GO:0005215(transporter activity)|GO:0005524(ATP binding)|GO:0005739(mitochondrion)|GO:0006810(transport)|GO:0006869(lipid transport)|GO:0016020(membrane)|GO:0016021(integral to membrane)|GO:0016887(ATPase activity)|GO:0042626(ATPase activity, coupled to transmembrane movement of substances)|GO:0055085(transmembrane transport)	CTCAAGCTGTTTTCTGATCTCCACATACATGTAGTGTCAGGCGTATATGTCTACATACCT	10350	ABCA9	0
A_55_P1969477	Abcb1a	ATP-binding cassette, sub-family B (MDR/TAP), member 1A	Mus musculus ATP-binding cassette, sub-family B (MDR/TAP), member 1A (Abcb1a), mRNA [NM_011076]	NM_011076	NM_011076	18671	chr5	8748075	8748134	+	36402	82	13	A_55_P1969477	FALSE	Mm.207354	ENSMUST00000126846		ref|NM_011076|ens|ENSMUST00000126846|ens|ENSMUST00000047753|ref|XM_006503555	chr5:008748075-008748134	mm|5qA1	GO:0000086(G2/M transition of mitotic cell cycle)|GO:0000166(nucleotide binding)|GO:0005524(ATP binding)|GO:0005886(plasma membrane)|GO:0006810(transport)|GO:0006855(drug transmembrane transport)|GO:0008559(xenobiotic-transporting ATPase activity)|GO:0009914(hormone transport)|GO:0009986(cell surface)|GO:0015893(drug transport)|GO:0016020(membrane)|GO:0016021(integral to membrane)|GO:0016787(hydr…	ACTCAGACATGGGCACCTGAGTTCAGATCCCTACCACCTAAGTAAGCAGCAAGGTGTGGT	5243	ABCB1	0
A_51_P245368	Abcb1b	ATP-binding cassette, sub-family B (MDR/TAP), member 1B	Mus musculus ATP-binding cassette, sub-family B (MDR/TAP), member 1B (Abcb1b), mRNA [NM_011075]	NM_011075	NM_011075	18669	chr5	8865925	8865984	+	11836	156	274	A_51_P245368	FALSE	Mm.146649	ENSMUST00000009058		ref|NM_011075|ens|ENSMUST00000009058|ref|XM_006503550|gb|BC141363	chr5:008865925-008865984	mm|5qA1	GO:0000139(Golgi membrane)|GO:0000166(nucleotide binding)|GO:0005215(transporter activity)|GO:0005524(ATP binding)|GO:0005739(mitochondrion)|GO:0005886(plasma membrane)|GO:0006810(transport)|GO:0006855(drug transmembrane transport)|GO:0008559(xenobiotic-transporting ATPase activity)|GO:0014045(establishment of endothelial blood-brain barrier)|GO:0015238(drug transmembrane transporter activity)|GO…	TCCAGGCTGGAGCAAAGCGCTCATGAGCTGTGACTATCTGAGGTGCTAAGTATTTTTAAT	5243	ABCB1	0
A_51_P249118	Abcb4	ATP-binding cassette, sub-family B (MDR/TAP), member 4	Mus musculus ATP-binding cassette, sub-family B (MDR/TAP), member 4 (Abcb4), mRNA [NM_008830]	NM_008830	NM_008830	18670	chr5	8959108	8959167	+	22068	125	146	A_51_P249118	FALSE	Mm.297825	ENSMUST00000003717		ref|NM_008830|ens|ENSMUST00000003717|ref|XM_006503552|ref|XM_006503551	chr5:008959108-008959167	mm|5qA1	GO:0000139(Golgi membrane)|GO:0000166(nucleotide binding)|GO:0005524(ATP binding)|GO:0005886(plasma membrane)|GO:0006810(transport)|GO:0008559(xenobiotic-transporting ATPase activity)|GO:0016020(membrane)|GO:0016021(integral to membrane)|GO:0016324(apical plasma membrane)|GO:0016787(hydrolase activity)|GO:0016887(ATPase activity)|GO:0042626(ATPase activity, coupled to transmembrane movement of su…	AGCTGCTGGCGCAGAAGGGCATCTATTTCTCAATGGTCAACATCCAGGCCGGCACACAGA	5244	ABCB4	0
A_51_P202801	Abcb9	ATP-binding cassette, sub-family B (MDR/TAP), member 9	Mus musculus ATP-binding cassette, sub-family B (MDR/TAP), member 9 (Abcb9), mRNA [NM_019875]	NM_019875	NM_019875	56325	chr5	124511934	124511875	-	34999	86	195	A_51_P202801	FALSE	Mm.254839	ENSMUST00000031354		ref|NM_019875|ens|ENSMUST00000031354|gb|AB093298|gb|AF216495	chr5:124511934-124511875	mm|5qF	GO:0000166(nucleotide binding)|GO:0005524(ATP binding)|GO:0005764(lysosome)|GO:0005765(lysosomal membrane)|GO:0005789(endoplasmic reticulum membrane)|GO:0006810(transport)|GO:0015031(protein transport)|GO:0015440(peptide-transporting ATPase activity)|GO:0015833(peptide transport)|GO:0016020(membrane)|GO:0016021(integral to membrane)|GO:0016887(ATPase activity)|GO:0022891(substrate-specific transm…	TCTGGCTTTGTCCTGGTTTCAAGATTTTGGGAGAACTGGGTCAATAAAGTGTACTACCTC	23457	ABCB9	0
A_55_P2050483	Abcc12	ATP-binding cassette, sub-family C (CFTR/MRP), member 12	Mus musculus ATP-binding cassette, sub-family C (CFTR/MRP), member 12 (Abcc12), mRNA [NM_172912]	NM_172912	NM_172912	244562	chr8	89028799	89028740	-	36537	81	72	A_55_P2050483	FALSE	Mm.67485	ENSMUST00000131806		ref|NM_172912|ens|ENSMUST00000131806|ens|ENSMUST00000156610|ens|ENSMUST00000080115	chr8:089028799-089028740	mm|8qC3	GO:0000166(nucleotide binding)|GO:0005524(ATP binding)|GO:0005739(mitochondrion)|GO:0006810(transport)|GO:0016020(membrane)|GO:0016021(integral to membrane)|GO:0016887(ATPase activity)|GO:0042626(ATPase activity, coupled to transmembrane movement of substances)|GO:0055085(transmembrane transport)	TAAAAGCAAATGAGATGGGAAAATGCCCAAGGCTGGAGATGACAGCGTTCCTGGATTTTG	94160	ABCC12	0
A_51_P277745	Abcc2	ATP-binding cassette, sub-family C (CFTR/MRP), member 2	Mus musculus ATP-binding cassette, sub-family C (CFTR/MRP), member 2 (Abcc2), mRNA [NM_013806]	NM_013806	NM_013806	12780	chr19	43912079	43912138	+	27861	108	39	A_51_P277745	FALSE	Mm.39054			ref|NM_013806|ref|XM_006526625|gb|AF213388|gb|AF227274	chr19:043912079-043912138	mm|19qC3	GO:0005515(protein binding)|GO:0005887(integral to plasma membrane)|GO:0006855(drug transmembrane transport)|GO:0009986(cell surface)|GO:0015732(prostaglandin transport)|GO:0016020(membrane)|GO:0016324(apical plasma membrane)|GO:0019904(protein domain specific binding)|GO:0030644(cellular chloride ion homeostasis)|GO:0042493(response to drug)|GO:0043627(response to estrogen stimulus)|GO:0046581(i…	ATTTCTTAGTTACTTTTGTTCTTGTGACTGTGTCATAGGGGCACAGATACACAGTTTGTT			0
A_55_P1985623	Abcc3	ATP-binding cassette, sub-family C (CFTR/MRP), member 3	Mus musculus ATP-binding cassette, sub-family C (CFTR/MRP), member 3 (Abcc3), mRNA [NM_029600]	NM_029600	NM_029600	76408	chr11	94204671	94204612	-	13764	151	25	A_55_P1985623	FALSE	Mm.23942	ENSMUST00000021231		ref|NM_029600|ens|ENSMUST00000021231|ens|ENSMUST00000178136|ref|XM_006534428	chr11:094204671-094204612	mm|11qD	GO:0000166(nucleotide binding)|GO:0005215(transporter activity)|GO:0005524(ATP binding)|GO:0005887(integral to plasma membrane)|GO:0006810(transport)|GO:0006855(drug transmembrane transport)|GO:0008559(xenobiotic-transporting ATPase activity)|GO:0015238(drug transmembrane transporter activity)|GO:0015432(bile acid-exporting ATPase activity)|GO:0015722(canalicular bile acid transport)|GO:0015893(d…	AACAGAGACCCTGTACTGGTGCTGTCTGAGTCCACTGATGAAATAAAGCTGTAGTCAACA			0
A_52_P630867	Abcc4	ATP-binding cassette, sub-family C (CFTR/MRP), member 4	Mus musculus ATP-binding cassette, sub-family C (CFTR/MRP), member 4 (Abcc4), transcript variant 1, mRNA [NM_001033336]	NM_001033336	NM_001033336	239273	chr14	118882163	118882104	-	62147	3	20	A_52_P630867	FALSE	Mm.40537	ENSMUST00000036554		ref|NM_001033336|ref|NM_001163675|ref|NM_001163676|ens|ENSMUST00000036554	chr14:118882163-118882104	mm|14qE4	GO:0005886(plasma membrane)|GO:0006855(drug transmembrane transport)|GO:0015238(drug transmembrane transporter activity)|GO:0016020(membrane)|GO:0016323(basolateral plasma membrane)|GO:0031088(platelet dense granule membrane)|GO:0048661(positive regulation of smooth muscle cell proliferation)	GCCAGTAAATGATGTAGATTCGTCCTTTATTGGTAGTCGCAGTTGATATTTCAAGAGAGT	10257	ABCC4	0
A_55_P1979814	Abcc8	ATP-binding cassette, sub-family C (CFTR/MRP), member 8	Mus musculus ATP-binding cassette, sub-family C (CFTR/MRP), member 8 (Abcc8), mRNA [NM_011510]	NM_011510	NM_011510	20927	chr7	53359967	53359908	-	50153	40	63	A_55_P1979814	FALSE	Mm.259076	ENSMUST00000033123		ref|NM_011510|ens|ENSMUST00000033123|ref|XM_011250838|ref|XM_006540750	chr7:053359967-053359908	mm|7qB4	GO:0005267(potassium channel activity)|GO:0005524(ATP binding)|GO:0005886(plasma membrane)|GO:0008076(voltage-gated potassium channel complex)|GO:0009268(response to pH)|GO:0010043(response to zinc ion)|GO:0019905(syntaxin binding)|GO:0030672(synaptic vesicle membrane)|GO:0042383(sarcolemma)|GO:0043268(positive regulation of potassium ion transport)|GO:0044325(ion channel binding)|GO:0046676(nega…	GCACCTCACTTGCTTGCCTAGTGTTTCGTACTGTAAATCACTTGTAAATAAAGAAATTAA	6833	ABCC8	0
A_66_P101519	Abcc9	ATP-binding cassette, sub-family C (CFTR/MRP), member 9	Mus musculus ATP-binding cassette, sub-family C (CFTR/MRP), member 9 (Abcc9), transcript variant 2, mRNA [NM_021041]	NM_021041	NM_021041	20928	chr6	142536979	142536920	-	52481	32	328	A_66_P101519	FALSE	Mm.35670			ref|NM_021041|ref|NM_001044720|ref|NM_021042|ref|NM_011511	chr6:142536979-142536920	mm|6qG2	GO:0000166(nucleotide binding)|GO:0005267(potassium channel activity)|GO:0005524(ATP binding)|GO:0005739(mitochondrion)|GO:0005886(plasma membrane)|GO:0006810(transport)|GO:0006813(potassium ion transport)|GO:0007165(signal transduction)|GO:0008076(voltage-gated potassium channel complex)|GO:0008144(drug binding)|GO:0008281(sulfonylurea receptor activity)|GO:0008282(ATP-sensitive potassium channe…	ATTGCGTTGCTTGGGCTACCTCCGATGACAGAAACGTGCTTTTACTGTAGGTAAAACCAT	10060	ABCC9	0
A_52_P456561	Abcd1	ATP-binding cassette, sub-family D (ALD), member 1	Mus musculus ATP-binding cassette, sub-family D (ALD), member 1 (Abcd1), mRNA [NM_007435]	NM_007435	NM_007435	11666	chrX	70982979	70983038	+	22735	123	124	A_52_P456561	FALSE	Mm.365	ENSMUST00000002084		ref|NM_007435|ens|ENSMUST00000002084|gb|Z33637|gb|AK009552	chrX:070982979-070983038	mm|XqA7.3	GO:0000166(nucleotide binding)|GO:0005325(peroxisomal fatty-acyl-CoA transporter activity)|GO:0005515(protein binding)|GO:0005524(ATP binding)|GO:0005737(cytoplasm)|GO:0005739(mitochondrion)|GO:0005777(peroxisome)|GO:0005778(peroxisomal membrane)|GO:0005779(integral to peroxisomal membrane)|GO:0006635(fatty acid beta-oxidation)|GO:0006810(transport)|GO:0007031(peroxisome organization)|GO:0015910(…	TAGCCAATTACCTGCATTCCCTGAAGACCCCACTCTGGGACAGGTAGATATGAATGGGGA	215	ABCD1	0
A_51_P249302	Abcd2	ATP-binding cassette, sub-family D (ALD), member 2	Mus musculus ATP-binding cassette, sub-family D (ALD), member 2 (Abcd2), mRNA [NM_011994]	NM_011994	NM_011994	26874	chr15	90976624	90976565	-	5503	176	147	A_51_P249302	FALSE	Mm.295456	ENSMUST00000069511		ref|NM_011994|ens|ENSMUST00000069511|ref|XM_006521017|gb|BC020388	chr15:090976624-090976565	mm|15qE3	GO:0000038(very long-chain fatty acid metabolic process)|GO:0000166(nucleotide binding)|GO:0005524(ATP binding)|GO:0005739(mitochondrion)|GO:0005777(peroxisome)|GO:0005778(peroxisomal membrane)|GO:0006635(fatty acid beta-oxidation)|GO:0006810(transport)|GO:0016020(membrane)|GO:0016021(integral to membrane)|GO:0016887(ATPase activity)|GO:0032000(positive regulation of fatty acid beta-oxidation)|GO…	CAAGGAAAATGAAGTATAGCTCCGGCTATCAAACTACTTATCTTTTCCTCAGAAAAGGTG	225	ABCD2	0
A_51_P138760	Abcd4	ATP-binding cassette, sub-family D (ALD), member 4	Mus musculus ATP-binding cassette, sub-family D (ALD), member 4 (Abcd4), mRNA [NM_008992]	NM_008992	NM_008992	19300	chr12	85943831	85943772	-	17331	140	107	A_51_P138760	FALSE	Mm.229109	ENSMUST00000021666		ref|NM_008992|ens|ENSMUST00000021666|gb|AJ001166|gb|BC050102	chr12:085943831-085943772	mm|12qD1	GO:0000166(nucleotide binding)|GO:0005524(ATP binding)|GO:0005777(peroxisome)|GO:0005789(endoplasmic reticulum membrane)|GO:0006810(transport)|GO:0009235(cobalamin metabolic process)|GO:0016020(membrane)|GO:0016021(integral to membrane)|GO:0016887(ATPase activity)|GO:0042626(ATPase activity, coupled to transmembrane movement of substances)|GO:0055085(transmembrane transport)	GTTTGCTGCTGAAAAACGGAATGAACTGTAAGACGTGAAGGGCCAGGGTGAGAAAACTAT	5826	ABCD4	0
A_51_P222467	Abcg1	ATP-binding cassette, sub-family G (WHITE), member 1	Mus musculus ATP-binding cassette, sub-family G (WHITE), member 1 (Abcg1), mRNA [NM_009593]	NM_009593	NM_009593	11307	chr17	31252580	31252639	+	30283	100	116	A_51_P222467	FALSE	Mm.15691	ENSMUST00000024829		ref|NM_009593|ens|ENSMUST00000024829|gb|AF323659|gb|U34920	chr17:031252580-031252639	mm|17qA3.3	GO:0000166(nucleotide binding)|GO:0005524(ATP binding)|GO:0005548(phospholipid transporter activity)|GO:0005654(nucleoplasm)|GO:0005739(mitochondrion)|GO:0005768(endosome)|GO:0005794(Golgi apparatus)|GO:0005886(plasma membrane)|GO:0006355(regulation of transcription, DNA-dependent)|GO:0006810(transport)|GO:0006869(lipid transport)|GO:0008203(cholesterol metabolic process)|GO:0009897(external side…	TTGAAATGCATATTATGATGTAATTTTCGGTTTGCTTGTTCTATACAAACACGGCCTTGC	9619	ABCG1	0
A_51_P155723	Abcg3	ATP-binding cassette, sub-family G (WHITE), member 3	Mus musculus ATP-binding cassette, sub-family G (WHITE), member 3 (Abcg3), mRNA [NM_030239]	NM_030239	NM_030239	27405	chr5	105364914	105364855	-	51075	37	187	A_51_P155723	FALSE	Mm.389663	ENSMUST00000031239		ref|NM_030239|ens|ENSMUST00000031239|ref|XM_011249451|ref|XM_011249452	chr5:105364914-105364855	mm|5qE5	GO:0003674(molecular_function)|GO:0005524(ATP binding)|GO:0005575(cellular_component)|GO:0006810(transport)|GO:0008150(biological_process)|GO:0016020(membrane)|GO:0016021(integral to membrane)|GO:0016887(ATPase activity)	CCTCTGAACATTAATAATTATACTCGTGGACAAATGCCACTGAGAGGATCCCTCTTCTGT	9429	ABCG2	0
A_52_P157450	Abhd1	abhydrolase domain containing 1	Mus musculus abhydrolase domain containing 1 (Abhd1), mRNA [NM_021304]	NM_021304	NM_021304	57742	chr5	31256786	31256925	+	1238	189	149	A_52_P157450	FALSE	Mm.389615			ref|NM_021304|ref|NR_003522|gb|AK162873|gb|AK156413	unmapped		GO:0003674(molecular_function)|GO:0004620(phospholipase activity)|GO:0005575(cellular_component)|GO:0008150(biological_process)|GO:0010296(prenylcysteine methylesterase activity)|GO:0016020(membrane)|GO:0016021(integral to membrane)|GO:0016298(lipase activity)|GO:0016787(hydrolase activity)|GO:0018731(1-oxa-2-oxocycloheptane lactonase activity)|GO:0018732(sulfolactone hydrolase activity)|GO:00187…	AGCCAATTGAAAAGGTGTTGGATGTAGACTTTGCGATAAAGGCCCGCACGATCCGCCAGC			0
A_55_P2059640	Abhd14b	abhydrolase domain containing 14b	Mus musculus abhydrolase domain containing 14b (Abhd14b), mRNA [NM_029631]	NM_029631	NM_029631	76491	chr9	106355187	106355246	+	59074	12	262	A_55_P2059640	FALSE	Mm.335427	ENSMUST00000048527		ref|NM_029631|ens|ENSMUST00000048527|ref|XM_006511848|ref|XM_006511847	chr9:106355187-106355246	mm|9qF1	GO:0003923(GPI-anchor transamidase activity)|GO:0005634(nucleus)|GO:0005730(nucleolus)|GO:0005737(cytoplasm)|GO:0005829(cytosol)|GO:0008152(metabolic process)|GO:0016787(hydrolase activity)|GO:0045944(positive regulation of transcription from RNA polymerase II promoter)|GO:0052770(coenzyme F390-A hydrolase activity)|GO:0052771(coenzyme F390-G hydrolase activity)|GO:0070062(extracellular vesicular…	GGGAGTGGGATAAGGAGAGGAGACCGACTTCGGAGGTCCCTGAAATAAAGTGATACAATT	84836	ABHD14B	0
A_52_P225584	Abhd15	abhydrolase domain containing 15	Mus musculus abhydrolase domain containing 15 (Abhd15), mRNA [NM_026185]	NM_026185	NM_026185	67477	chr11	77332133	77332192	+	46203	52	91	A_52_P225584	FALSE	Mm.432526	ENSMUST00000147386		ref|NM_026185|ens|ENSMUST00000147386|ens|ENSMUST00000094004|gb|FJ154119	chr11:077332133-077332192	mm|11qB5	GO:0003674(molecular_function)|GO:0004620(phospholipase activity)|GO:0005576(extracellular region)|GO:0008150(biological_process)|GO:0010296(prenylcysteine methylesterase activity)|GO:0016020(membrane)|GO:0016298(lipase activity)|GO:0016787(hydrolase activity)|GO:0018731(1-oxa-2-oxocycloheptane lactonase activity)|GO:0018732(sulfolactone hydrolase activity)|GO:0018733(3,4-dihydrocoumarin hydrolas…	CTTGCCAGCATGGAGCCACGAGGTCATCTTGGAGTCCTTCAGGGCCCTGACTGAATTCTT	116236	ABHD15	0
A_51_P386503	Abhd15	abhydrolase domain containing 15	Mus musculus abhydrolase domain containing 15 (Abhd15), mRNA [NM_026185]	NM_026185	NM_026185	67477	chr11	77333444	77333503	+	15616	145	257	A_51_P386503	FALSE	Mm.432526	ENSMUST00000094004		ref|NM_026185|ens|ENSMUST00000094004|gb|AK004929|gb|AK046590	chr11:077333444-077333503	mm|11qB5	GO:0003674(molecular_function)|GO:0004620(phospholipase activity)|GO:0005576(extracellular region)|GO:0008150(biological_process)|GO:0010296(prenylcysteine methylesterase activity)|GO:0016020(membrane)|GO:0016298(lipase activity)|GO:0016787(hydrolase activity)|GO:0018731(1-oxa-2-oxocycloheptane lactonase activity)|GO:0018732(sulfolactone hydrolase activity)|GO:0018733(3,4-dihydrocoumarin hydrolas…	TCCCAGGATGACTTACATGGCTTGGGTTGGATTAAGCCTTTACAAATCATTTTGATAGCT	116236	ABHD15	0
A_55_P1978176	Abhd17c	abhydrolase domain containing 17C	Mus musculus abhydrolase domain containing 17C (Abhd17c), mRNA [NM_133722]	NM_133722	NM_133722	70178	chr7	91257983	91257924	-	54756	26	41	A_55_P1978176	FALSE	Mm.23914	ENSMUST00000117085		ref|NM_133722|gb|AK008906|gb|BC018511|ens|ENSMUST00000117085	chr7:091257983-091257924	mm|7qD3	GO:0003923(GPI-anchor transamidase activity)|GO:0005575(cellular_component)|GO:0008150(biological_process)|GO:0016787(hydrolase activity)|GO:0052770(coenzyme F390-A hydrolase activity)|GO:0052771(coenzyme F390-G hydrolase activity)	AATGTACTGTAAGCCTCAGATCGTTGTACAACTGGATTGCGTTGGTTGCCAGTTTGTGTG	58489	ABHD17C	0
A_51_P406020	Abhd4	abhydrolase domain containing 4	Mus musculus abhydrolase domain containing 4 (Abhd4), transcript variant 1, mRNA [NM_134076]	NM_134076	NM_134076	105501	chr14	54888753	54888812	+	18670	136	53	A_51_P406020	FALSE	Mm.28771	ENSMUST00000180359		ref|NM_134076|ref|NM_001205181|ens|ENSMUST00000180359|ens|ENSMUST00000041197	chr14:054888753-054888812	mm|14qC2	GO:0004620(phospholipase activity)|GO:0006629(lipid metabolic process)|GO:0010296(prenylcysteine methylesterase activity)|GO:0016042(lipid catabolic process)|GO:0016298(lipase activity)|GO:0016787(hydrolase activity)|GO:0018731(1-oxa-2-oxocycloheptane lactonase activity)|GO:0018732(sulfolactone hydrolase activity)|GO:0018733(3,4-dihydrocoumarin hydrolase activity)|GO:0018734(butyrolactone hydrola…	AATAGTATTAACTCCTGGTGCTTTGTACTACTGGTTCAGCGGCCTCGGGCTTCTTTTCTA	63874	ABHD4	0
A_51_P185906	Abi3	ABI gene family, member 3	Mus musculus ABI gene family, member 3 (Abi3), transcript variant 1, mRNA [NM_025659]	NM_025659	NM_025659	66610	chr11	95693956	95693897	-	19580	133	201	A_51_P185906	FALSE	Mm.485545	ENSMUST00000131049		ref|NM_025659|ref|NM_001163464|ens|ENSMUST00000131049|ens|ENSMUST00000059026	chr11:095693956-095693897	mm|11qD	GO:0003674(molecular_function)|GO:0005622(intracellular)|GO:0005737(cytoplasm)|GO:0016020(membrane)|GO:0018108(peptidyl-tyrosine phosphorylation)|GO:0030027(lamellipodium)|GO:0030334(regulation of cell migration)	TTCCACAGTCAAAGCTGGACTAAGGACCTGTCTACCTCTTGGGCTGTGAACTGTGTTCAG	51225	ABI3	0
A_55_P2167803	Abi3bp	ABI gene family, member 3 (NESH) binding protein	Mus musculus ABI gene family, member 3 (NESH) binding protein (Abi3bp), transcript variant 5, mRNA [NM_001014423]	NM_001014423	NM_001014423	320712	chr16	56689293	56689352	+	10846	159	286	A_55_P2167803	FALSE	Mm.209236			ref|NM_001014423|ref|NM_001014424|ref|NM_001014422|ref|NM_178790	chr16:056689293-056689352	mm|16qC1.1	GO:0005518(collagen binding)|GO:0005539(glycosaminoglycan binding)|GO:0005578(proteinaceous extracellular matrix)|GO:0005614(interstitial matrix)|GO:0008201(heparin binding)|GO:0010811(positive regulation of cell-substrate adhesion)|GO:0030198(extracellular matrix organization)	GTAAGTTTGCAATCTGAGAGCAGTACCGGATGTTTATTATTAGAAAAGATTACTGAGGAT	25890	ABI3BP	0
A_52_P489778	Ablim1	actin-binding LIM protein 1	Mus musculus actin-binding LIM protein 1 (Ablim1), transcript variant 1, mRNA [NM_178688]	NM_178688	NM_178688	226251	chr19	57108765	57108706	-	22727	123	140	A_52_P489778	FALSE	Mm.217161			ref|NM_178688|ref|NM_001103177|ref|NM_001290816|ref|NM_001290815	chr19:057108765-057108706	mm|19qD2	GO:0001725(stress fiber)|GO:0003779(actin binding)|GO:0005515(protein binding)|GO:0005737(cytoplasm)|GO:0005856(cytoskeleton)|GO:0007010(cytoskeleton organization)|GO:0007411(axon guidance)|GO:0008270(zinc ion binding)|GO:0015629(actin cytoskeleton)|GO:0030027(lamellipodium)|GO:0030032(lamellipodium assembly)|GO:0042384(cilium assembly)|GO:0045944(positive regulation of transcription from RNA pol…	CAACAACTAAATACGAACTGCCTGTTCTCTAAACCTCAAGGAGAAAAACTGGAGTTAATG	3983	ABLIM1	0
A_55_P2013158	Ablim1	actin-binding LIM protein 1	Mus musculus actin-binding LIM protein 1 (Ablim1), transcript variant 1, mRNA [NM_178688]	NM_178688	NM_178688	226251	chr19	57111731	57111672	-	450	191	86	A_55_P2013158	FALSE	Mm.217161			ref|NM_178688|ref|NM_001103177|ref|NM_001290816|ref|NM_001290815	chr19:057111731-057111672	mm|19qD2	GO:0001725(stress fiber)|GO:0003779(actin binding)|GO:0005515(protein binding)|GO:0005737(cytoplasm)|GO:0005856(cytoskeleton)|GO:0007010(cytoskeleton organization)|GO:0007411(axon guidance)|GO:0008270(zinc ion binding)|GO:0015629(actin cytoskeleton)|GO:0030027(lamellipodium)|GO:0030032(lamellipodium assembly)|GO:0042384(cilium assembly)|GO:0045944(positive regulation of transcription from RNA pol…	AAAGCTAAACTCTTCTAAGTCCCTCGAGTAAACGACAATCAGGAAACGAACTCTCAGTGG	3983	ABLIM1	0
A_51_P322043	Ablim2	actin-binding LIM protein 2	Mus musculus actin-binding LIM protein 2 (Ablim2), transcript variant 3, mRNA [NM_177678]	NM_177678	NM_177678	231148	chr5	36227458	36227517	+	39156	73	82	A_51_P322043	FALSE	Mm.254446			ref|NM_177678|ref|NM_001177696|ref|NM_001177697|ref|NM_001177698	chr5:036227458-036227517	mm|5qB3	GO:0003674(molecular_function)|GO:0003779(actin binding)|GO:0005737(cytoplasm)|GO:0006351(transcription, DNA-dependent)|GO:0007010(cytoskeleton organization)|GO:0008270(zinc ion binding)|GO:0015629(actin cytoskeleton)|GO:0030016(myofibril)|GO:0030036(actin cytoskeleton organization)|GO:0045944(positive regulation of transcription from RNA polymerase II promoter)|GO:0046872(metal ion binding)	AGCCTGGCTGGGCCGTGGAGGGGAACTTTTGGTACTTAATCTGCTTCCTGCCACTTAGCA	84448	ABLIM2	0
A_55_P2186356	Ablim2	actin-binding LIM protein 2	Mus musculus actin-binding LIM protein 2 (Ablim2), transcript variant 1, mRNA [NM_001177696]	NM_001177696	NM_001177696	231148	chr5	36226009	36226068	+	49967	40	108	A_55_P2186356	FALSE	Mm.254446			ref|NM_001177696|ref|NM_001177697|ref|NM_177678|ref|NM_001177698	chr5:036226009-036226068	mm|5qB3	GO:0003674(molecular_function)|GO:0003779(actin binding)|GO:0005737(cytoplasm)|GO:0006351(transcription, DNA-dependent)|GO:0007010(cytoskeleton organization)|GO:0008270(zinc ion binding)|GO:0015629(actin cytoskeleton)|GO:0030016(myofibril)|GO:0030036(actin cytoskeleton organization)|GO:0045944(positive regulation of transcription from RNA polymerase II promoter)|GO:0046872(metal ion binding)	TTTGACCGCCTGGCCCTGTGGAAGAGGAATGACCTCAAGAAGAAAGCCTTGCTGTTCTGA	84448	ABLIM2	0
A_66_P121636	Ablim3	actin binding LIM protein family, member 3	Mus musculus actin binding LIM protein family, member 3 (Ablim3), transcript variant 1, mRNA [NM_198649]	NM_198649	NM_198649	319713	chr18	61959180	61959121	-	17226	140	317	A_66_P121636	FALSE	Mm.329478	ENSMUST00000049378		ref|NM_198649|ref|NM_001164491|ens|ENSMUST00000049378|ens|ENSMUST00000166783	chr18:061959180-061959121	mm|18qE1	GO:0001725(stress fiber)|GO:0003674(molecular_function)|GO:0003779(actin binding)|GO:0005737(cytoplasm)|GO:0006351(transcription, DNA-dependent)|GO:0007010(cytoskeleton organization)|GO:0008270(zinc ion binding)|GO:0030027(lamellipodium)|GO:0030032(lamellipodium assembly)|GO:0030036(actin cytoskeleton organization)|GO:0042384(cilium assembly)|GO:0045944(positive regulation of transcription from R…	AAATGTCCCCCCGGCCAGATGCGATCATTGAAACTGCCTCATTGTCACTGGTTAACAACT	22885	ABLIM3	0
A_51_P155196	Abtb2	ankyrin repeat and BTB (POZ) domain containing 2	Mus musculus ankyrin repeat and BTB (POZ) domain containing 2 (Abtb2), mRNA [NM_178890]	NM_178890	NM_178890	99382	chr2	103558385	103558444	+	54487	26	252	A_51_P155196	FALSE	Mm.35850	ENSMUST00000076212		ref|NM_178890|ens|ENSMUST00000076212|ens|ENSMUST00000131122|gb|AK151620	chr2:103558385-103558444	mm|2qE2	GO:0003674(molecular_function)|GO:0005634(nucleus)|GO:0005654(nucleoplasm)|GO:0046982(protein heterodimerization activity)|GO:0097237(cellular response to toxin)	CTATTTATTCATCAGAAGCCCCCAGGGCTTGCAATCCTGGAAAGATATTTTCAACTTGCT	25841	ABTB2	0
A_55_P1980237	Acad11	acyl-Coenzyme A dehydrogenase family, member 11	Mus musculus acyl-Coenzyme A dehydrogenase family, member 11 (Acad11), mRNA [NM_175324]	NM_175324	NM_175324	102632	chr9	104029734	104029793	+	12560	154	138	A_55_P1980237	FALSE	Mm.41274	ENSMUST00000047799		ref|NM_175324|ens|ENSMUST00000047799|gb|AK139918|gb|AK077531	chr9:104029734-104029793	mm|9qF1	GO:0003995(acyl-CoA dehydrogenase activity)|GO:0004466(long-chain-acyl-CoA dehydrogenase activity)|GO:0005634(nucleus)|GO:0005739(mitochondrion)|GO:0005777(peroxisome)|GO:0008152(metabolic process)|GO:0016491(oxidoreductase activity)|GO:0016627(oxidoreductase activity, acting on the CH-CH group of donors)|GO:0016772(transferase activity, transferring phosphorus-containing groups)|GO:0016937(short…	GTTGGAAAGGTTTGAGTTGGTGGTCTGCTTTATCAAGTAAGGATGTTTTGAAATCTCGTC	84129	ACAD11	0
A_51_P384113	Acad12	acyl-Coenzyme A dehydrogenase family, member 12	Mus musculus acyl-Coenzyme A dehydrogenase family, member 12 (Acad12), mRNA [NM_178799]	NM_178799	NM_178799	338350	chr5	122048453	122048394	-	21910	126	133	A_51_P384113	FALSE	Mm.482918	ENSMUST00000041252		ref|NM_178799|ref|XM_011248231|gb|AK033963|ens|ENSMUST00000041252	chr5:122048453-122048394	mm|5qF	GO:0003674(molecular_function)|GO:0005739(mitochondrion)|GO:0008150(biological_process)	ACGTCACAGAATACTGATTCAGATGCTCTGTGGTAAAAGGGCCTTTCGGGACACAAAGAA	80724	ACAD10	0
A_51_P149455	Acadl	acyl-Coenzyme A dehydrogenase, long-chain	Mus musculus acyl-Coenzyme A dehydrogenase, long-chain (Acadl), mRNA [NM_007381]	NM_007381	NM_007381	11363	chr1	66877732	66877673	-	4090	180	22	A_51_P149455	FALSE	Mm.2445	ENSMUST00000027153		ref|NM_007381|ens|ENSMUST00000027153|gb|AK167537|gb|AK005140	chr1:066877732-066877673	mm|1qC3	GO:0000062(fatty-acyl-CoA binding)|GO:0001659(temperature homeostasis)|GO:0003995(acyl-CoA dehydrogenase activity)|GO:0004466(long-chain-acyl-CoA dehydrogenase activity)|GO:0005737(cytoplasm)|GO:0005739(mitochondrion)|GO:0005759(mitochondrial matrix)|GO:0006629(lipid metabolic process)|GO:0006631(fatty acid metabolic process)|GO:0008152(metabolic process)|GO:0016401(palmitoyl-CoA oxidase activity…	GTCTTACTTGTCTTTCAAATTCTGAAGAGCATAAGTTGGCTTTCATTCTTAAAGTTGAGG	33	ACADL	0
A_51_P292757	Acbd4	acyl-Coenzyme A binding domain containing 4	Mus musculus acyl-Coenzyme A binding domain containing 4 (Acbd4), transcript variant 1, mRNA [NM_025988]	NM_025988	NM_025988	67131	chr11	102973437	102973496	+	28210	106	326	A_51_P292757	FALSE	Mm.390367	ENSMUST00000124965		ref|NM_025988|ens|ENSMUST00000124965|ens|ENSMUST00000024492|ens|ENSMUST00000092559	chr11:102973437-102973496	mm|11qE1	GO:0003674(molecular_function)|GO:0005575(cellular_component)|GO:0008150(biological_process)	ACAAGTACACATCGCGCTCAGGACTTCACTGAAGATTCACGTGCAATTGAACGCTTCATT	79777	ACBD4	0
A_52_P68028	Ace	angiotensin I converting enzyme (peptidyl-dipeptidase A) 1	Mus musculus angiotensin I converting enzyme (peptidyl-dipeptidase A) 1 (Ace), transcript variant 2, mRNA [NM_009598]	NM_009598	NM_009598	11421	chr11	105850398	105850457	+	57445	17	240	A_52_P68028	FALSE	Mm.754	ENSMUST00000001964		ref|NM_009598|ref|NM_001281819|ref|NM_207624|ens|ENSMUST00000001964	chr11:105850398-105850457	mm|11qE1	GO:0001822(kidney development)|GO:0002446(neutrophil mediated immunity)|GO:0003081(regulation of systemic arterial blood pressure by renin-angiotensin)|GO:0003084(positive regulation of systemic arterial blood pressure)|GO:0003779(actin binding)|GO:0004175(endopeptidase activity)|GO:0004180(carboxypeptidase activity)|GO:0005515(protein binding)|GO:0005576(extracellular region)|GO:0005615(extracel…	ATGGGGGACATGGTGTTTGAGTGGAACATACCCTAGCTGAGCCTTCCTCCTTTGCTGTCC	1636	ACE	0
A_55_P1953583	Ace2	angiotensin I converting enzyme (peptidyl-dipeptidase A) 2	Mus musculus angiotensin I converting enzyme (peptidyl-dipeptidase A) 2 (Ace2), transcript variant 1, mRNA [NM_001130513]	NM_001130513	NM_001130513	70008	chrX	160626291	160626350	+	51146	37	45	A_55_P1953583	FALSE	Mm.13451	ENSMUST00000112271		ref|NM_001130513|ref|NM_027286|ens|ENSMUST00000112271|ens|ENSMUST00000073973	chrX:160626291-160626350	mm|XqF5	GO:0001618(viral receptor activity)|GO:0001948(glycoprotein binding)|GO:0003051(angiotensin-mediated drinking behavior)|GO:0003081(regulation of systemic arterial blood pressure by renin-angiotensin)|GO:0004175(endopeptidase activity)|GO:0004180(carboxypeptidase activity)|GO:0005576(extracellular region)|GO:0005615(extracellular space)|GO:0005737(cytoplasm)|GO:0005886(plasma membrane)|GO:0006508(…	GAGCAATGGTGAACACAAAGCCGACCTCAATAAATACTTATTAGATTTAGACACTCCTCT	59272	ACE2	0
A_55_P2109326	Ache	acetylcholinesterase	Mus musculus acetylcholinesterase (Ache), transcript variant 1, mRNA [NM_001290010]	NM_001290010	NM_001290010	11423	chr5	137733122	137733181	+	61601	5	127	A_55_P2109326	FALSE	Mm.255464	ENSMUST00000150983		ref|NM_001290010|ref|NM_009599|ens|ENSMUST00000150983|ens|ENSMUST00000085934	chr5:137733122-137733181	mm|5qG2	GO:0001919(regulation of receptor recycling)|GO:0003990(acetylcholinesterase activity)|GO:0004104(cholinesterase activity)|GO:0005515(protein binding)|GO:0005518(collagen binding)|GO:0005576(extracellular region)|GO:0005605(basal lamina)|GO:0005615(extracellular space)|GO:0005635(nuclear envelope)|GO:0005737(cytoplasm)|GO:0005788(endoplasmic reticulum lumen)|GO:0005791(rough endoplasmic reticulum…	ACTACACCACGGAGGAGAGGATCTTTGCTCAGCGACTTATGAAATACTGGACCAATTTTG	43	ACHE	0
A_55_P2109327	Ache	acetylcholinesterase	Mus musculus acetylcholinesterase (Ache), transcript variant 1, mRNA [NM_001290010]	NM_001290010	NM_001290010	11423	chr5	137735513	137735572	+	16806	141	174	A_55_P2109327	FALSE	Mm.255464	ENSMUST00000024099		ref|NM_001290010|ref|NM_009599|ens|ENSMUST00000024099|ens|ENSMUST00000085934	chr5:137735513-137735572	mm|5qG2	GO:0001919(regulation of receptor recycling)|GO:0003990(acetylcholinesterase activity)|GO:0004104(cholinesterase activity)|GO:0005515(protein binding)|GO:0005518(collagen binding)|GO:0005576(extracellular region)|GO:0005605(basal lamina)|GO:0005615(extracellular space)|GO:0005635(nuclear envelope)|GO:0005737(cytoplasm)|GO:0005788(endoplasmic reticulum lumen)|GO:0005791(rough endoplasmic reticulum…	TGTATATACACTATTTATTTAAGGGCTGGGATATAATACGACCGAGCCCCCAGGCCCTGT	43	ACHE	0
A_55_P2105321	Acin1	apoptotic chromatin condensation inducer 1	Mus musculus apoptotic chromatin condensation inducer 1 (Acin1), transcript variant 2, mRNA [NM_023190]	NM_023190	NM_023190	56215	chr14	55262838	55262779	-	50151	40	67	A_55_P2105321	FALSE	Mm.297078			ref|NM_023190|ref|NM_001085473|ref|NM_019567|ref|NM_001242605	chr14:055262838-055262779	mm|14qC3	GO:0000166(nucleotide binding)|GO:0002230(positive regulation of defense response to virus by host)|GO:0003676(nucleic acid binding)|GO:0005634(nucleus)|GO:0005654(nucleoplasm)|GO:0005730(nucleolus)|GO:0005737(cytoplasm)|GO:0005886(plasma membrane)|GO:0006397(mRNA processing)|GO:0006915(apoptotic process)|GO:0008380(RNA splicing)|GO:0010506(regulation of autophagy)|GO:0016607(nuclear speck)|GO:00…	TCCCGTGACCGCCGCCGGAAAGAGCGAGCAAAATCTAAAGAAAAGAAGAGTGAAAAGAAA	22985	ACIN1	0
A_52_P110052	Ackr1	atypical chemokine receptor 1 (Duffy blood group)	Mus musculus atypical chemokine receptor 1 (Duffy blood group) (Ackr1), mRNA [NM_010045]	NM_010045	NM_010045	13349	chr1	175262341	175262282	-	29494	103	53	A_52_P110052	FALSE	Mm.6393	ENSMUST00000038227		ref|NM_010045|ens|ENSMUST00000038227|gb|AF109159|gb|AY289754	chr1:175262341-175262282	mm|1qH3	GO:0004871(signal transducer activity)|GO:0004930(G-protein coupled receptor activity)|GO:0005768(endosome)|GO:0006954(inflammatory response)|GO:0007165(signal transduction)|GO:0007186(G-protein coupled receptor signaling pathway)|GO:0016020(membrane)|GO:0016021(integral to membrane)|GO:0019956(chemokine binding)|GO:0019957(C-C chemokine binding)|GO:0032642(regulation of chemokine production)|GO:…	GTTCATTTTCTGGTGGCCTCATGGGATGGTTCTCATATTTGATGCTTTGGTGAGGTCCAA	2532	ACKR1	0
A_52_P675395	Ackr3	atypical chemokine receptor 3	Mus musculus atypical chemokine receptor 3 (Ackr3), transcript variant 2, mRNA [NM_007722]	NM_007722	NM_007722	12778	chr1	92111803	92111862	+	3420	182	50	A_52_P675395	FALSE	Mm.6522			ref|NM_007722|ref|NM_001271607|gb|AF000236|gb|BC015254	chr1:092111803-092111862	mm|1qD	GO:0001525(angiogenesis)|GO:0001570(vasculogenesis)|GO:0002230(positive regulation of defense response to virus by host)|GO:0004871(signal transducer activity)|GO:0004930(G-protein coupled receptor activity)|GO:0004950(chemokine receptor activity)|GO:0005044(scavenger receptor activity)|GO:0005737(cytoplasm)|GO:0005768(endosome)|GO:0005886(plasma membrane)|GO:0005905(coated pit)|GO:0006935(chemot…	TGGACATGTGTACAGTAGAATCTTCTGTGTTTCTTCAAGTTTTTACTTGGTGACTTTTTG	57007	ACKR3	0
A_55_P2038358	Acot1	acyl-CoA thioesterase 1	Mus musculus acyl-CoA thioesterase 1 (Acot1), mRNA [NM_012006]	NM_012006	NM_012006	26897	chr12	85358561	85358620	+	10748	160	153	A_55_P2038358	FALSE	Mm.1978	ENSMUST00000168120		ref|NM_012006|ens|ENSMUST00000168120|gb|Y14004|gb|BC022951	chr12:085358561-085358620	mm|12qD1	GO:0001676(long-chain fatty acid metabolic process)|GO:0005737(cytoplasm)|GO:0005739(mitochondrion)|GO:0005829(cytosol)|GO:0006637(acyl-CoA metabolic process)|GO:0016290(palmitoyl-CoA hydrolase activity)|GO:0016787(hydrolase activity)|GO:0016790(thiolester hydrolase activity)|GO:0047617(acyl-CoA hydrolase activity)|GO:0052689(carboxylic ester hydrolase activity)	TCTATGGAAACTGGAGCTATCCAAGAAAAGTGCCAGGAATAAAAAGGAACCATGATTAAA	10965	ACOT2	0
A_55_P2096043	Acot11	acyl-CoA thioesterase 11	Mus musculus acyl-CoA thioesterase 11 (Acot11), mRNA [NM_025590]	NM_025590	NM_025590	329910	chr4	106417244	106417185	-	37215	79	28	A_55_P2096043	FALSE	Mm.222956	ENSMUST00000102762		ref|NM_025590|ens|ENSMUST00000102762|ref|XM_006503181|ref|XM_011240557	chr4:106417244-106417185	mm|4qC7	GO:0005622(intracellular)|GO:0005737(cytoplasm)|GO:0006631(fatty acid metabolic process)|GO:0008289(lipid binding)|GO:0016289(CoA hydrolase activity)|GO:0016787(hydrolase activity)|GO:0034843(2-oxoglutaryl-CoA thioesterase activity)|GO:0034869(2,4,4-trimethyl-3-oxopentanoyl-CoA thioesterase activity)|GO:0034946(3-isopropylbut-3-enoyl-CoA thioesterase activity)|GO:0035556(intracellular signal tran…	GTTGCTACCTCATTCTCTTAAGAGTTCAGCTGTATTCTGCAAATAAAATGCTTGAAACCG	26027	ACOT11	0
A_52_P215170	Acot4	acyl-CoA thioesterase 4	Mus musculus acyl-CoA thioesterase 4 (Acot4), mRNA [NM_134247]	NM_134247	NM_134247	171282	chr12	85384821	85384880	+	10810	160	29	A_52_P215170	FALSE	Mm.482217	ENSMUST00000021652		ref|NM_134247|ens|ENSMUST00000021652|gb|AK080883|gb|BC113185	chr12:085384821-085384880	mm|12qD1	GO:0000038(very long-chain fatty acid metabolic process)|GO:0001676(long-chain fatty acid metabolic process)|GO:0004778(succinyl-CoA hydrolase activity)|GO:0005102(receptor binding)|GO:0005777(peroxisome)|GO:0006104(succinyl-CoA metabolic process)|GO:0006637(acyl-CoA metabolic process)|GO:0016290(palmitoyl-CoA hydrolase activity)|GO:0016787(hydrolase activity)|GO:0016790(thiolester hydrolase acti…	TGCTGGATGACATGAAATTCATGTTTAGGGCATTAATGGCTTATAAGTCACTGTACTGAA	122970	ACOT4	0
A_55_P2038362	Acot5	acyl-CoA thioesterase 5	Mus musculus acyl-CoA thioesterase 5 (Acot5), mRNA [NM_145444]	NM_145444	NM_145444	217698	chr12	85416634	85416693	+	37614	78	213	A_55_P2038362	FALSE	Mm.484019	ENSMUST00000046422		ref|NM_145444|ens|ENSMUST00000046422|ref|XM_011244075|ref|XM_011244074	chr12:085416634-085416693	mm|12qD1	GO:0000038(very long-chain fatty acid metabolic process)|GO:0001676(long-chain fatty acid metabolic process)|GO:0005777(peroxisome)|GO:0005829(cytosol)|GO:0006637(acyl-CoA metabolic process)|GO:0016290(palmitoyl-CoA hydrolase activity)|GO:0016787(hydrolase activity)|GO:0016790(thiolester hydrolase activity)|GO:0032788(saturated monocarboxylic acid metabolic process)|GO:0032789(unsaturated monocar…	GGAGAAGCCCCAGATTGTCTGCTACCCCAAAACAGGACACCACATTGAACCCCCTTACAT	10965	ACOT2	0
A_66_P138319	Acox2	acyl-Coenzyme A oxidase 2, branched chain	Mus musculus acyl-Coenzyme A oxidase 2, branched chain (Acox2), transcript variant 1, mRNA [NM_053115]	NM_053115	NM_053115	93732	chr14	9058200	9058141	-	7817	169	111	A_66_P138319	FALSE	Mm.28700	ENSMUST00000164598		ref|NM_053115|ref|NM_001161667|ens|ENSMUST00000164598|ens|ENSMUST00000022271	chr14:009058200-009058141	mm|14qA1	GO:0003995(acyl-CoA dehydrogenase activity)|GO:0003997(acyl-CoA oxidase activity)|GO:0005102(receptor binding)|GO:0005504(fatty acid binding)|GO:0005777(peroxisome)|GO:0006629(lipid metabolic process)|GO:0006631(fatty acid metabolic process)|GO:0006635(fatty acid beta-oxidation)|GO:0008152(metabolic process)|GO:0016491(oxidoreductase activity)|GO:0016627(oxidoreductase activity, acting on the CH-…	TGGCGTGCGGCTTGTTCAGATCAGCGAGTAAACTGGTACATGAAAGGATGTTCATCATAT	8309	ACOX2	0
A_52_P745	Acox3	acyl-Coenzyme A oxidase 3, pristanoyl	Mus musculus acyl-Coenzyme A oxidase 3, pristanoyl (Acox3), mRNA [NM_030721]	NM_030721	NM_030721	80911	chr5	35956215	35956274	+	531	191	251	A_52_P745	FALSE	Mm.291503	ENSMUST00000068947		ref|NM_030721|ens|ENSMUST00000068947|ref|XM_006504198|gb|AK053960	chr5:035956215-035956274	mm|5qB3	GO:0003995(acyl-CoA dehydrogenase activity)|GO:0003997(acyl-CoA oxidase activity)|GO:0005102(receptor binding)|GO:0005504(fatty acid binding)|GO:0005739(mitochondrion)|GO:0005777(peroxisome)|GO:0005782(peroxisomal matrix)|GO:0006629(lipid metabolic process)|GO:0006631(fatty acid metabolic process)|GO:0006635(fatty acid beta-oxidation)|GO:0008152(metabolic process)|GO:0016020(membrane)|GO:0016402(…	AACCAGACTTAGATGGGTGATATCACATGACTTCTAGAAATGAATGGTGTATCCTGGTCC	8310	ACOX3	0
A_55_P2085288	Acoxl	acyl-Coenzyme A oxidase-like	Mus musculus acyl-Coenzyme A oxidase-like (Acoxl), mRNA [NM_028765]	NM_028765	NM_028765	74121	chr2	127949507	127949566	+	10543	160	236	A_55_P2085288	FALSE	Mm.244835	ENSMUST00000028859		ref|NM_028765|ens|ENSMUST00000028859|gb|AK004775|tc|TC1587140	chr2:127949507-127949566	mm|2qF1	GO:0003995(acyl-CoA dehydrogenase activity)|GO:0003997(acyl-CoA oxidase activity)|GO:0005777(peroxisome)|GO:0006631(fatty acid metabolic process)|GO:0006635(fatty acid beta-oxidation)|GO:0008152(metabolic process)|GO:0016401(palmitoyl-CoA oxidase activity)|GO:0016402(pristanoyl-CoA oxidase activity)|GO:0016491(oxidoreductase activity)|GO:0016627(oxidoreductase activity, acting on the CH-CH group …	ATGTGCAAAGATTAATAAATAATAGAAAGATGCTCCCGCGGCTTGGAGAGGTAGGGCTGG	55289	ACOXL	0
A_55_P2160416	Acoxl	acyl-Coenzyme A oxidase-like	Mus musculus acyl-Coenzyme A oxidase-like (Acoxl), mRNA [NM_028765]	NM_028765	NM_028765	74121	chr2	127949156	127949215	+	34950	86	293	A_55_P2160416	FALSE	Mm.244835	ENSMUST00000110344		ref|NM_028765|ens|ENSMUST00000110344|ens|ENSMUST00000028859|gb|BC048717	chr2:127949156-127949215	mm|2qF1	GO:0003995(acyl-CoA dehydrogenase activity)|GO:0003997(acyl-CoA oxidase activity)|GO:0005777(peroxisome)|GO:0006631(fatty acid metabolic process)|GO:0006635(fatty acid beta-oxidation)|GO:0008152(metabolic process)|GO:0016401(palmitoyl-CoA oxidase activity)|GO:0016402(pristanoyl-CoA oxidase activity)|GO:0016491(oxidoreductase activity)|GO:0016627(oxidoreductase activity, acting on the CH-CH group …	ATGGTGCCACCAAAGATCTCTACTGTCAGTGGTGACTCATATTCCCAGAGACTTCGAAAA	55289	ACOXL	0
A_66_P103970	Acp1	acid phosphatase 1, soluble	Mus musculus acid phosphatase 1, soluble (Acp1), transcript variant 1, mRNA [NM_001110239]	NM_001110239	NM_001110239	11431	chr12	31578253	31578194	-	5644	175	194	A_66_P103970	FALSE	Mm.359831	ENSMUST00000062740		ref|NM_001110239|ref|NM_021330|ens|ENSMUST00000062740|ens|ENSMUST00000074038	chr12:031578253-031578194	mm|12qA2	GO:0003993(acid phosphatase activity)|GO:0004721(phosphoprotein phosphatase activity)|GO:0004725(protein tyrosine phosphatase activity)|GO:0004726(non-membrane spanning protein tyrosine phosphatase activity)|GO:0005737(cytoplasm)|GO:0006470(protein dephosphorylation)|GO:0009898(internal side of plasma membrane)|GO:0016311(dephosphorylation)|GO:0016787(hydrolase activity)|GO:0016791(phosphatase ac…	GCAAAGGAATTATGGAAGAGTGCAAAAATAAATCTCTGTCCACAGGAAGTGGGCATGAAG	52	ACP1	0
A_55_P1997766	Acp5	acid phosphatase 5, tartrate resistant	Mus musculus acid phosphatase 5, tartrate resistant (Acp5), transcript variant 1, mRNA [NM_001102405]	NM_001102405	NM_001102405	11433	chr9	21931234	21931175	-	7475	170	139	A_55_P1997766	FALSE	Mm.46354	ENSMUST00000165735		ref|NM_001102405|ref|NM_001102404|ref|NM_007388|ens|ENSMUST00000165735	chr9:021931234-021931175	mm|9qA3	GO:0003993(acid phosphatase activity)|GO:0005764(lysosome)|GO:0016311(dephosphorylation)|GO:0016787(hydrolase activity)|GO:0032496(response to lipopolysaccharide)|GO:0032691(negative regulation of interleukin-1 beta production)|GO:0032695(negative regulation of interleukin-12 production)|GO:0032720(negative regulation of tumor necrosis factor production)|GO:0032929(negative regulation of superoxi…	GCTTTCCTTTCAGTCAAGTCTTACTGTCACTGCTATTCAATAAAACAATGCTTTGTCTCC	54	ACP5	0
A_55_P2037608	Acp5	acid phosphatase 5, tartrate resistant	Mus musculus acid phosphatase 5, tartrate resistant (Acp5), transcript variant 1, mRNA [NM_001102405]	NM_001102405	NM_001102405	11433	chr9	21931249	21931190	-	29078	104	229	A_55_P2037608	FALSE	Mm.46354	ENSMUST00000115315		ref|NM_001102405|ref|NM_001102404|ref|NM_007388|ens|ENSMUST00000115315	chr9:021931249-021931190	mm|9qA3	GO:0003993(acid phosphatase activity)|GO:0005764(lysosome)|GO:0016311(dephosphorylation)|GO:0016787(hydrolase activity)|GO:0032496(response to lipopolysaccharide)|GO:0032691(negative regulation of interleukin-1 beta production)|GO:0032695(negative regulation of interleukin-12 production)|GO:0032720(negative regulation of tumor necrosis factor production)|GO:0032929(negative regulation of superoxi…	CTTTCTTGGGAACGGGCTTTCCTTTCAGTCAAGTCTTACTGTCACTGCTATTCAATAAAA	54	ACP5	0
A_52_P119060	Acpp	acid phosphatase, prostate	Mus musculus acid phosphatase, prostate (Acpp), transcript variant 1, mRNA [NM_207668]	NM_207668	NM_207668	56318	chr9	104190666	104190607	-	28139	107	139	A_52_P119060	FALSE	Mm.19941			ref|NM_207668|gb|AK076383|tc|TC1634861|riken|4732480P03	chr9:104190666-104190607	mm|9qF1	GO:0003993(acid phosphatase activity)|GO:0005576(extracellular region)|GO:0005615(extracellular space)|GO:0005622(intracellular)|GO:0005634(nucleus)|GO:0005764(lysosome)|GO:0005765(lysosomal membrane)|GO:0005771(multivesicular body)|GO:0005886(plasma membrane)|GO:0006144(purine base metabolic process)|GO:0006772(thiamine metabolic process)|GO:0008253(5'-nucleotidase activity)|GO:0009117(nucleotid…	AGTCAAGTAAAACAAACACAACAGGTCACCTTTATCCTGTGTCTTCACTGTTTTTTAATC	55	ACPP	0
A_52_P496956	Acsbg1	acyl-CoA synthetase bubblegum family member 1	Mus musculus acyl-CoA synthetase bubblegum family member 1 (Acsbg1), mRNA [NM_053178]	NM_053178	NM_053178	94180	chr9	54453069	54453010	-	55234	24	70	A_52_P496956	FALSE	Mm.20592	ENSMUST00000034822		ref|NM_053178|ens|ENSMUST00000034822|ref|XM_006511588|ref|XM_006511589	chr9:054453069-054453010	mm|9qA5.3	GO:0000038(very long-chain fatty acid metabolic process)|GO:0000166(nucleotide binding)|GO:0001676(long-chain fatty acid metabolic process)|GO:0003824(catalytic activity)|GO:0004467(long-chain fatty acid-CoA ligase activity)|GO:0005524(ATP binding)|GO:0005737(cytoplasm)|GO:0005777(peroxisome)|GO:0005783(endoplasmic reticulum)|GO:0005794(Golgi apparatus)|GO:0006629(lipid metabolic process)|GO:0006…	TGACATCTCCAATGCCTTCACGTGCAAGTAGTTTCAATTCTAACCACTGCTCCTGTTCAG	23205	ACSBG1	0
A_51_P479321	Acss1	acyl-CoA synthetase short-chain family member 1	Mus musculus acyl-CoA synthetase short-chain family member 1 (Acss1), mRNA [NM_080575]	NM_080575	NM_080575	68738	chr2	150443930	150443871	-	14671	148	179	A_51_P479321	FALSE	Mm.7044	ENSMUST00000028944		ref|NM_080575|ens|ENSMUST00000028944|gb|AB046742|gb|AK173275	chr2:150443930-150443871	mm|2qG3	GO:0000166(nucleotide binding)|GO:0003824(catalytic activity)|GO:0003987(acetate-CoA ligase activity)|GO:0005524(ATP binding)|GO:0005739(mitochondrion)|GO:0005759(mitochondrial matrix)|GO:0006085(acetyl-CoA biosynthetic process)|GO:0008152(metabolic process)|GO:0016208(AMP binding)|GO:0016874(ligase activity)|GO:0019413(acetate biosynthetic process)|GO:0019427(acetyl-CoA biosynthetic process from…	TGGCCTAGGTTTCTAGGTTACTGATAGAAGCTCTCGGAATGATTTATAGAAATATCCAAA	84532	ACSS1	0
A_55_P1988789	Acss2	acyl-CoA synthetase short-chain family member 2	Mus musculus acyl-CoA synthetase short-chain family member 2 (Acss2), mRNA [NM_019811]	NM_019811	NM_019811	60525	chr2	155388416	155388475	+	29076	104	233	A_55_P1988789	FALSE	Mm.255026	ENSMUST00000029135		ref|NM_019811|ens|ENSMUST00000029135|ref|XM_006499973|ref|XM_006499974	chr2:155388416-155388475	mm|2qH1	GO:0000166(nucleotide binding)|GO:0003824(catalytic activity)|GO:0003987(acetate-CoA ligase activity)|GO:0005524(ATP binding)|GO:0005654(nucleoplasm)|GO:0005737(cytoplasm)|GO:0006085(acetyl-CoA biosynthetic process)|GO:0008152(metabolic process)|GO:0008610(lipid biosynthetic process)|GO:0016874(ligase activity)|GO:0019413(acetate biosynthetic process)|GO:0019542(propionate biosynthetic process)|G…	TTTCTTGTTCTTTTTGTGCTCAAGACCCACTGTTATAGGAATAAAGTTTATGAGCTCAAG	55902	ACSS2	0
A_55_P1988795	Acss2	acyl-CoA synthetase short-chain family member 2	Mus musculus acyl-CoA synthetase short-chain family member 2 (Acss2), mRNA [NM_019811]	NM_019811	NM_019811	60525	chr2	155387492	155387551	+	5915	174	308	A_55_P1988795	FALSE	Mm.255026	ENSMUST00000133654		ref|NM_019811|ens|ENSMUST00000133654|ens|ENSMUST00000029135|ref|XM_006499973	chr2:155387492-155387551	mm|2qH1	GO:0000166(nucleotide binding)|GO:0003824(catalytic activity)|GO:0003987(acetate-CoA ligase activity)|GO:0005524(ATP binding)|GO:0005654(nucleoplasm)|GO:0005737(cytoplasm)|GO:0006085(acetyl-CoA biosynthetic process)|GO:0008152(metabolic process)|GO:0008610(lipid biosynthetic process)|GO:0016874(ligase activity)|GO:0019413(acetate biosynthetic process)|GO:0019542(propionate biosynthetic process)|G…	GATTGGCCCCATTGCCACACCAGACTACATCCAGAATGCACCTGGCTTGCCTAAAACACG	55902	ACSS2	0
A_52_P57622	Acss3	acyl-CoA synthetase short-chain family member 3	Mus musculus acyl-CoA synthetase short-chain family member 3 (Acss3), transcript variant 2, mRNA [NM_198636]	NM_198636	NM_198636	380660	chr10	106425940	106425881	-	46811	50	187	A_52_P57622	FALSE	Mm.336072	ENSMUST00000165067		ref|NM_198636|ref|NM_001142804|ens|ENSMUST00000165067|ens|ENSMUST00000044668	chr10:106425940-106425881	mm|10qD1	GO:0000166(nucleotide binding)|GO:0003674(molecular_function)|GO:0003824(catalytic activity)|GO:0003987(acetate-CoA ligase activity)|GO:0005524(ATP binding)|GO:0005739(mitochondrion)|GO:0008150(biological_process)|GO:0008152(metabolic process)|GO:0016874(ligase activity)	GAAAGATGTGATGTGGAGACCCTAGAATGGTCCAAAAAAGTCTTCCGAGTTCCCGTTCTA	79611	ACSS3	0
A_52_P420504	Acta2	actin, alpha 2, smooth muscle, aorta	Mus musculus actin, alpha 2, smooth muscle, aorta (Acta2), mRNA [NM_007392]	NM_007392	NM_007392	11475	chr19	34316119	34316060	-	3172	183	217	A_52_P420504	FALSE	Mm.213025	ENSMUST00000039631		ref|NM_007392|ens|ENSMUST00000039631|gb|X13297|gb|AK002886	chr19:034316119-034316060	mm|19qC1	GO:0000166(nucleotide binding)|GO:0005515(protein binding)|GO:0005524(ATP binding)|GO:0005615(extracellular space)|GO:0005737(cytoplasm)|GO:0005856(cytoskeleton)|GO:0006936(muscle contraction)|GO:0008217(regulation of blood pressure)|GO:0014829(vascular smooth muscle contraction)|GO:0015629(actin cytoskeleton)|GO:0019901(protein kinase binding)|GO:0030485(smooth muscle contractile fiber)|GO:00700…	GTTTTGTGGATCAGCGCCTCCAGTTCCTTTCCAAATCATTCCTGCCCAAAGCTTTGATTT	59	ACTA2	0
A_55_P2040951	Actc1	actin, alpha, cardiac muscle 1	Mus musculus actin, alpha, cardiac muscle 1 (Actc1), mRNA [NM_009608]	NM_009608	NM_009608	11464	chr2	113873123	113873064	-	2148	186	297	A_55_P2040951	FALSE	Mm.686	ENSMUST00000090269		ref|NM_009608|ens|ENSMUST00000090269|gb|AK169165|gb|AK014307	chr2:113873123-113873064	mm|2qE4	GO:0000166(nucleotide binding)|GO:0005524(ATP binding)|GO:0005615(extracellular space)|GO:0005737(cytoplasm)|GO:0005856(cytoskeleton)|GO:0005884(actin filament)|GO:0005925(focal adhesion)|GO:0008152(metabolic process)|GO:0016020(membrane)|GO:0016887(ATPase activity)|GO:0017022(myosin binding)|GO:0030017(sarcomere)|GO:0030048(actin filament-based movement)|GO:0030240(skeletal muscle thin filament …	CTCTCATCAGTCATTGTACAGTTTGTTTACACAAGTGCAGTTTGTTTGTGCTTCAAATAT	70	ACTC1	0
A_55_P1963807	Actg2	actin, gamma 2, smooth muscle, enteric	Mus musculus actin, gamma 2, smooth muscle, enteric (Actg2), mRNA [NM_009610]	NM_009610	NM_009610	11468	chr6	83462963	83462904	-	23091	122	68	A_55_P1963807	FALSE	Mm.292865	ENSMUST00000075161		ref|NM_009610|ens|ENSMUST00000075161|ens|ENSMUST00000121731|gb|BC002042	chr6:083462963-083462904	mm|6qC3	GO:0000166(nucleotide binding)|GO:0005524(ATP binding)|GO:0005615(extracellular space)|GO:0005737(cytoplasm)|GO:0005856(cytoskeleton)|GO:0070062(extracellular vesicular exosome)|GO:0071944(cell periphery)|GO:0072562(blood microparticle)	TCTGGGGATCCCCACAAGACTGCTGTCACCAGCCACAGATCATTAAAACCTTCAAGCCTT	72	ACTG2	0
A_52_P231737	Actl6a	actin-like 6A	Mus musculus actin-like 6A (Actl6a), mRNA [NM_019673]	NM_019673	NM_019673	56456	chr3	32621551	32621610	+	40735	68	204	A_52_P231737	FALSE	Mm.41077	ENSMUST00000193231		ref|NM_019673|ens|ENSMUST00000193231|ens|ENSMUST00000153779|ens|ENSMUST00000029214	chr3:032621551-032621610	mm|3qA3	GO:0000790(nuclear chromatin)|GO:0000978(RNA polymerase II core promoter proximal region sequence-specific DNA binding)|GO:0000980(RNA polymerase II distal enhancer sequence-specific DNA binding)|GO:0003682(chromatin binding)|GO:0005515(protein binding)|GO:0005634(nucleus)|GO:0005886(plasma membrane)|GO:0006281(DNA repair)|GO:0006310(DNA recombination)|GO:0006338(chromatin remodeling)|GO:0006351(…	GGCAGTGTGATCGTAGCAGGAGGAAACACGCTAATACAGAGTTTCACTGACAGGTTAAAT	86	ACTL6A	0
A_51_P108266	Actn2	actinin alpha 2	Mus musculus actinin alpha 2 (Actn2), mRNA [NM_033268]	NM_033268	NM_033268	11472	chr13	12367362	12364990	-	13033	153	175	A_51_P108266	FALSE	Mm.37638	ENSMUST00000168193		ref|NM_033268|ens|ENSMUST00000168193|ens|ENSMUST00000064204|ref|XM_011244263	unmapped		GO:0003779(actin binding)|GO:0005509(calcium ion binding)|GO:0005515(protein binding)|GO:0005737(cytoplasm)|GO:0005865(striated muscle thin filament)|GO:0005925(focal adhesion)|GO:0006936(muscle contraction)|GO:0008092(cytoskeletal protein binding)|GO:0030017(sarcomere)|GO:0030018(Z disc)|GO:0030035(microspike assembly)|GO:0030175(filopodium)|GO:0030274(LIM domain binding)|GO:0030374(ligand-depen…	TTCAACCACTTTGACAGGAGAAAGAACGGCCTGATGGATCATGAGGATTTCAGAGCCTGC	88	ACTN2	0
A_55_P2163438	Actn2	actinin alpha 2	Mus musculus adult male corpus striatum cDNA, RIKEN full-length enriched library, clone:C030030I18 product:ALPHA-ACTININ 2 (ALPHA ACTININ SKELETAL MUSCLE ISOFORM 2) (F-ACTIN CROSS LINKING PROTEIN) homolog [Mus musculus], full insert sequence. [AK047768]		AK047768	11472	chr13	12400607	12400548	-	31587	96	132	A_55_P2163438	FALSE	Mm.37638	ENSMUST00000110616		gb|AK047768|ens|ENSMUST00000110616|tc|TC1615300|riken|C030030I18	chr13:12400607-12400548	mm|13qA1	GO:0003779(actin binding)|GO:0005509(calcium ion binding)|GO:0005515(protein binding)|GO:0005737(cytoplasm)|GO:0005865(striated muscle thin filament)|GO:0005925(focal adhesion)|GO:0006936(muscle contraction)|GO:0008092(cytoskeletal protein binding)|GO:0030017(sarcomere)|GO:0030018(Z disc)|GO:0030035(microspike assembly)|GO:0030175(filopodium)|GO:0030274(LIM domain binding)|GO:0030374(ligand-depen…	TAGCATTCAGGAAGCTAAGACAGGAGGATCACAAATTTGAAAGCCCCTCAGGCTTTGTAG	88	ACTN2	0
A_52_P594049	Actr5	ARP5 actin-related protein 5	Mus musculus ARP5 actin-related protein 5 (Actr5), mRNA [NM_175419]	NM_175419	NM_175419	109275	chr2	158464861	158464920	+	54110	28	21	A_52_P594049	FALSE	Mm.27747	ENSMUST00000142531		ref|NM_175419|ens|ENSMUST00000142531|ens|ENSMUST00000183731|ref|XM_006498566	chr2:158464861-158464920	mm|2qH1	GO:0003674(molecular_function)|GO:0005634(nucleus)|GO:0005737(cytoplasm)|GO:0006281(DNA repair)|GO:0006302(double-strand break repair)|GO:0006310(DNA recombination)|GO:0006351(transcription, DNA-dependent)|GO:0006355(regulation of transcription, DNA-dependent)|GO:0006974(response to DNA damage stimulus)|GO:0031011(Ino80 complex)|GO:0070914(UV-damage excision repair)	GAAACAGCTGGAGGGAGAAGTGGGCAGTGCTGCTCTTTGCACTGTTTTGTTTTGTTTTTA	79913	ACTR5	0
A_55_P2064203	Acvr1c	activin A receptor, type IC	Mus musculus activin A receptor, type IC (Acvr1c), transcript variant 1, mRNA [NM_001111030]	NM_001111030	NM_001111030	269275	chr2	58119947	58119888	-	2995	183	244	A_55_P2064203	FALSE	Mm.77751	ENSMUST00000028178		ref|NM_001111030|ref|NM_001033369|ens|ENSMUST00000028178	chr2:058119947-058119888	mm|2qC1.1	GO:0000166(nucleotide binding)|GO:0001701(in utero embryonic development)|GO:0001834(trophectodermal cell proliferation)|GO:0002021(response to dietary excess)|GO:0004672(protein kinase activity)|GO:0004674(protein serine/threonine kinase activity)|GO:0004675(transmembrane receptor protein serine/threonine kinase activity)|GO:0004702(receptor signaling protein serine/threonine kinase activity)|GO…	CAAAGACAATGAATTAAGCACTCGTTGCACTTGTTTCTGTAAAGCATAAAGAGCTCTATT	130399	ACVR1C	0
A_55_P1975140	Acvr1c	activin A receptor, type IC	Mus musculus activin A receptor, type IC (Acvr1c), transcript variant 1, mRNA [NM_001111030]	NM_001111030	NM_001111030	269275	chr2	58124303	58124244	-	39175	73	44	A_55_P1975140	FALSE	Mm.77751	ENSMUST00000028178		ref|NM_001111030|ref|NM_001033369|ens|ENSMUST00000028178|ref|XM_006498085	chr2:058124303-058124244	mm|2qC1.1	GO:0000166(nucleotide binding)|GO:0001701(in utero embryonic development)|GO:0001834(trophectodermal cell proliferation)|GO:0002021(response to dietary excess)|GO:0004672(protein kinase activity)|GO:0004674(protein serine/threonine kinase activity)|GO:0004675(transmembrane receptor protein serine/threonine kinase activity)|GO:0004702(receptor signaling protein serine/threonine kinase activity)|GO…	CATAATTGTATGAAAATAGTAACCTGATCGCAATGTCTGAAGAGTTTCAAATCGGCGTTT	130399	ACVR1C	0
A_55_P2012815	Acvr2b	activin receptor IIB	Mus musculus activin receptor IIB (Acvr2b), mRNA [NM_007397]	NM_007397	NM_007397	11481	chr9	119342560	119342619	+	59903	10	243	A_55_P2012815	FALSE	Mm.390239	ENSMUST00000035093		ref|NM_007397|ens|ENSMUST00000035093|ens|ENSMUST00000165044|gb|M84120	chr9:119342560-119342619	mm|9qF3	GO:0000166(nucleotide binding)|GO:0001501(skeletal system development)|GO:0001702(gastrulation with mouth forming second)|GO:0001822(kidney development)|GO:0001946(lymphangiogenesis)|GO:0001974(blood vessel remodeling)|GO:0004672(protein kinase activity)|GO:0004674(protein serine/threonine kinase activity)|GO:0004675(transmembrane receptor protein serine/threonine kinase activity)|GO:0004702(rece…	CTAAAGAGTCCAGCATCTAAGCCCGGGACACGTAGCGTCTCTCCAGACTCAGTGGATCTG	93	ACVR2B	0
A_55_P2011380	Acvrl1	activin A receptor, type II-like 1	Mus musculus activin A receptor, type II-like 1 (Acvrl1), transcript variant 5, mRNA [NM_001277255]	NM_001277255	NM_001277255	11482	chr15	100974010	100974069	+	34019	89	187	A_55_P2011380	FALSE	Mm.279542			ref|NM_001277255|ref|NM_001277259|ref|NM_009612|ref|NM_001277257	chr15:100974010-100974069	mm|15qF2	GO:0000166(nucleotide binding)|GO:0001525(angiogenesis)|GO:0001701(in utero embryonic development)|GO:0001937(negative regulation of endothelial cell proliferation)|GO:0001938(positive regulation of endothelial cell proliferation)|GO:0001946(lymphangiogenesis)|GO:0001974(blood vessel remodeling)|GO:0004672(protein kinase activity)|GO:0004674(protein serine/threonine kinase activity)|GO:0004675(tr…	TGTGCCTGCTCAGCTTGGCTCCCAGCCCATCCAGCCAAAAATACAGCTGAGCTGAAATTC	94	ACVRL1	0
A_51_P232399	Acy3	aspartoacylase (aminoacylase) 3	Mus musculus aspartoacylase (aminoacylase) 3 (Acy3), transcript variant 1, mRNA [NM_001302479]	NM_001302479	NM_001302479	71670	chr19	3989878	3989937	+	49610	41	166	A_51_P232399	FALSE	Mm.29735			ref|NM_001302479|ref|NM_001302480|ref|NM_001302481|ref|NM_001302482	chr19:003989878-003989937	mm|19qA	GO:0004046(aminoacylase activity)|GO:0005515(protein binding)|GO:0005737(cytoplasm)|GO:0005886(plasma membrane)|GO:0008152(metabolic process)|GO:0016020(membrane)|GO:0016324(apical plasma membrane)|GO:0016787(hydrolase activity)|GO:0016788(hydrolase activity, acting on ester bonds)|GO:0016811(hydrolase activity, acting on carbon-nitrogen (but not peptide) bonds, in linear amides)|GO:0042802(ident…	TACCTGGCCTGATCTCAGTTTTCCTATCTGAACAATGGGTCCCAAGCCCAGGGTCCCCTA	91703	ACY3	0
A_55_P2039215	Acyp2	acylphosphatase 2, muscle type	Mus musculus acylphosphatase 2, muscle type (Acyp2), mRNA [NM_029344]	NM_029344	NM_029344	75572	chr11	30406185	30406126	-	13363	152	171	A_55_P2039215	FALSE	Mm.390319	ENSMUST00000074613		ref|NM_029344|ens|ENSMUST00000074613|gb|AK046238|gb|AK009134	chr11:030406185-030406126	mm|11qA4	GO:0003998(acylphosphatase activity)|GO:0005739(mitochondrion)|GO:0008150(biological_process)|GO:0016787(hydrolase activity)	ACTCACCTATGTTTTAGCAAGCAGAAACTAAATATTATAAAATAAAATGTCATTATAAAT	98	ACYP2	0
A_55_P2055819	Adam15	a disintegrin and metallopeptidase domain 15 (metargidin)	Mus musculus a disintegrin and metallopeptidase domain 15 (metargidin) (Adam15), transcript variant 1, mRNA [NM_001037722]	NM_001037722	NM_001037722	11490	chr3	89143622	89143563	-	12446	155	37	A_55_P2055819	FALSE	Mm.274049	ENSMUST00000148068		ref|NM_001037722|ref|NM_009614|ens|ENSMUST00000148068|ens|ENSMUST00000029676	chr3:089143622-089143563	mm|3qF1	GO:0001525(angiogenesis)|GO:0001953(negative regulation of cell-matrix adhesion)|GO:0004222(metalloendopeptidase activity)|GO:0005178(integrin binding)|GO:0005515(protein binding)|GO:0005622(intracellular)|GO:0006508(proteolysis)|GO:0007155(cell adhesion)|GO:0007229(integrin-mediated signaling pathway)|GO:0008233(peptidase activity)|GO:0008237(metallopeptidase activity)|GO:0008270(zinc ion bindin…	GAAGGACATGGACACTGTCTATCTCTGCTCTGTTGTAATAAATGTGAGATCTTGGAATGT	8751	ADAM15	0
A_51_P282144	Adam23	a disintegrin and metallopeptidase domain 23	Mus musculus a disintegrin and metallopeptidase domain 23 (Adam23), transcript variant 2, mRNA [NM_011780]	NM_011780	NM_011780	23792	chr1	63639339	63639398	+	16618	142	221	A_51_P282144	FALSE	Mm.124892	ENSMUST00000087374		ref|NM_011780|ens|ENSMUST00000087374|ens|ENSMUST00000097717|ref|XM_006495969	chr1:063639339-063639398	mm|1qC2	GO:0004222(metalloendopeptidase activity)|GO:0005515(protein binding)|GO:0005576(extracellular region)|GO:0005886(plasma membrane)|GO:0006508(proteolysis)|GO:0007155(cell adhesion)|GO:0008237(metallopeptidase activity)|GO:0008270(zinc ion binding)|GO:0016020(membrane)|GO:0016021(integral to membrane)	TAATGACTACAGAGCCTCAGATCTGAGAATTGGGATGGGGTACAAGACAAAGGTCCCTTT	8745	ADAM23	0
A_55_P2073754	Adam23	a disintegrin and metallopeptidase domain 23	Mus musculus a disintegrin and metallopeptidase domain 23 (Adam23), transcript variant 2, mRNA [NM_011780]	NM_011780	NM_011780	23792	chr1	63642791	63642850	+	59255	12	227	A_55_P2073754	FALSE	Mm.124892	ENSMUST00000087374		ref|NM_011780|ens|ENSMUST00000087374|ens|ENSMUST00000097717|gb|AK032687	chr1:063642791-063642850	mm|1qC2	GO:0004222(metalloendopeptidase activity)|GO:0005515(protein binding)|GO:0005576(extracellular region)|GO:0005886(plasma membrane)|GO:0006508(proteolysis)|GO:0007155(cell adhesion)|GO:0008237(metallopeptidase activity)|GO:0008270(zinc ion binding)|GO:0016020(membrane)|GO:0016021(integral to membrane)	TCAAAGGTTCACTACAAATTGAAGCAGCCAATGGAGCAAAATAAACTCTCTGGTTAATGG	8745	ADAM23	0
A_52_P333289	Adam33	a disintegrin and metallopeptidase domain 33	Mus musculus a disintegrin and metallopeptidase domain 33 (Adam33), transcript variant 1, mRNA [NM_033615]	NM_033615	NM_033615	110751	chr2	130878566	130877240	-	2335	185	252	A_52_P333289	FALSE	Mm.108550	ENSMUST00000134742		ref|NM_033615|ref|NM_001163529|ens|ENSMUST00000134742|ens|ENSMUST00000183552	unmapped		GO:0004222(metalloendopeptidase activity)|GO:0006508(proteolysis)|GO:0008233(peptidase activity)|GO:0008237(metallopeptidase activity)|GO:0008270(zinc ion binding)|GO:0016020(membrane)|GO:0016021(integral to membrane)|GO:0016787(hydrolase activity)|GO:0042035(regulation of cytokine biosynthetic process)|GO:0042127(regulation of cell proliferation)|GO:0046872(metal ion binding)	CCCTATGGAATAGAGACATACCCCTGGGCAGTGTGCATCCGGTGGAGTTTGGCTCCATCA	80332	ADAM33	0
A_55_P2083694	Adam33	a disintegrin and metallopeptidase domain 33	Mus musculus a disintegrin and metallopeptidase domain 33 (Adam33), transcript variant 1, mRNA [NM_033615]	NM_033615	NM_033615	110751	chr2	130876904	130876845	-	17266	140	237	A_55_P2083694	FALSE	Mm.108550	ENSMUST00000110232		ref|NM_033615|ref|NM_001163529|ens|ENSMUST00000110232|ens|ENSMUST00000132436	chr2:130876904-130876845	mm|2qF1	GO:0004222(metalloendopeptidase activity)|GO:0006508(proteolysis)|GO:0008233(peptidase activity)|GO:0008237(metallopeptidase activity)|GO:0008270(zinc ion binding)|GO:0016020(membrane)|GO:0016021(integral to membrane)|GO:0016787(hydrolase activity)|GO:0042035(regulation of cytokine biosynthetic process)|GO:0042127(regulation of cell proliferation)|GO:0046872(metal ion binding)	TTGTCCCCTCCTCAGATTTACAGGCTTGCATCAATAAAGAAATGAGACATGGGCCTCAGA	80332	ADAM33	0
A_55_P2025746	Adam5	a disintegrin and metallopeptidase domain 5	Mus musculus a disintegrin and metallopeptidase domain 5 (Adam5), transcript variant 3, mRNA [NM_007401]	NM_007401	NM_007401	11499	chr8	25843516	25843457	-	50748	38	185	A_55_P2025746	FALSE	Mm.143889	ENSMUST00000118419		ref|NM_007401|ref|NM_001272057|ens|ENSMUST00000118419|ref|XM_006508985	chr8:025843516-025843457	mm|8qA2	GO:0004222(metalloendopeptidase activity)|GO:0006508(proteolysis)|GO:0008237(metallopeptidase activity)|GO:0008270(zinc ion binding)|GO:0016020(membrane)|GO:0016021(integral to membrane)	CACAGCTTCTCTCCCACTCTAAACCATGAACTAATAAATCAGCTATGACTGAACAAATGC			0
A_55_P2168327	Adam5	a disintegrin and metallopeptidase domain 5	Mus musculus a disintegrin and metallopeptidase domain 5 (Adam5), transcript variant 2, mRNA [NM_001272057]	NM_001272057	NM_001272057	11499	chr8	25857189	25857130	-	59290	12	157	A_55_P2168327	FALSE	Mm.143889			ref|NM_001272057|ref|NM_001272059|ref|NM_007401|ref|NM_001272058	chr8:025857189-025857130	mm|8qA2	GO:0004222(metalloendopeptidase activity)|GO:0006508(proteolysis)|GO:0008237(metallopeptidase activity)|GO:0008270(zinc ion binding)|GO:0016020(membrane)|GO:0016021(integral to membrane)	TGTGAGGAACATAAGGGACAGTTTGGAAGCGTTGATGATGGACATAAATATCATGTTGAA			0
A_51_P103054	Adamts19	a disintegrin-like and metallopeptidase (reprolysin type) with thrombospondin type 1 motif, 19	Mus musculus a disintegrin-like and metallopeptidase (reprolysin type) with thrombospondin type 1 motif, 19 (Adamts19), mRNA [NM_175506]	NM_175506	NM_175506	240322	chr18	59212971	59213030	+	16808	141	170	A_51_P103054	FALSE	Mm.71963	ENSMUST00000052907		ref|NM_175506|ens|ENSMUST00000052907|ref|XM_006525919|ref|XM_006525920	chr18:059212971-059213030	mm|18qD3	GO:0004222(metalloendopeptidase activity)|GO:0005576(extracellular region)|GO:0005578(proteinaceous extracellular matrix)|GO:0006508(proteolysis)|GO:0008233(peptidase activity)|GO:0008237(metallopeptidase activity)|GO:0008270(zinc ion binding)|GO:0016787(hydrolase activity)|GO:0031012(extracellular matrix)|GO:0046872(metal ion binding)	TGATGCACTGTATCGATGTACACTGAATCACCATTGCGCTGTTGGTGAAGGTGTAGAGAA	171019	ADAMTS19	0
A_51_P227222	Adamts2	a disintegrin-like and metallopeptidase (reprolysin type) with thrombospondin type 1 motif, 2	Mus musculus a disintegrin-like and metallopeptidase (reprolysin type) with thrombospondin type 1 motif, 2 (Adamts2), transcript variant 1, mRNA [NM_175643]	NM_175643	NM_175643	216725	chr11	50617472	50617531	+	44045	58	144	A_51_P227222	FALSE	Mm.339048	ENSMUST00000040523		ref|NM_175643|ens|ENSMUST00000040523|ref|XM_011248901|gb|AK040370	chr11:050617472-050617531	mm|11qB1.3	GO:0004222(metalloendopeptidase activity)|GO:0005576(extracellular region)|GO:0005578(proteinaceous extracellular matrix)|GO:0006508(proteolysis)|GO:0007283(spermatogenesis)|GO:0008233(peptidase activity)|GO:0008237(metallopeptidase activity)|GO:0008270(zinc ion binding)|GO:0016485(protein processing)|GO:0016787(hydrolase activity)|GO:0030199(collagen fibril organization)|GO:0030324(lung developm…	CAAAGAATCCAGGAGCTCATTAATGCAGTGCAGAGGAAAGAGAAGCCGGGAAAGTTCTAA	9509	ADAMTS2	0
A_55_P1953107	Adamts20	a disintegrin-like and metallopeptidase (reprolysin type) with thrombospondin type 1 motif, 20	Mus musculus a disintegrin-like and metallopeptidase (reprolysin type) with thrombospondin type 1 motif, 20 (Adamts20), transcript variant 1, mRNA [NM_177431]	NM_177431	NM_177431	223838	chr15	94110511	94110452	-	19126	134	126	A_55_P1953107	FALSE	Mm.214132	ENSMUST00000035342		ref|NM_177431|ens|ENSMUST00000035342|gb|AJ512753|gb|BC121792	chr15:094110511-094110452	mm|15qE3	GO:0004175(endopeptidase activity)|GO:0004222(metalloendopeptidase activity)|GO:0005576(extracellular region)|GO:0005578(proteinaceous extracellular matrix)|GO:0005615(extracellular space)|GO:0006508(proteolysis)|GO:0008233(peptidase activity)|GO:0008237(metallopeptidase activity)|GO:0008270(zinc ion binding)|GO:0009967(positive regulation of signal transduction)|GO:0016787(hydrolase activity)|GO…	ATCTTCTTTTTTCCCAGACACTATCTGGAAAGGCAGTTCCATTTGCTACAGCTGGGGACT	80070	ADAMTS20	0
A_55_P1956918	Adamts5	a disintegrin-like and metallopeptidase (reprolysin type) with thrombospondin type 1 motif, 5 (aggrecanase-2)	Mus musculus a disintegrin-like and metallopeptidase (reprolysin type) with thrombospondin type 1 motif, 5 (aggrecanase-2) (Adamts5), mRNA [NM_011782]	NM_011782	NM_011782	23794	chr16	85858461	85858402	-	6107	174	251	A_55_P1956918	FALSE	Mm.112933			ref|NM_011782|gb|AK046558|tc|TC1598269|riken|B430009L16	chr16:085858461-085858402	mm|16qC3.3	GO:0004222(metalloendopeptidase activity)|GO:0005576(extracellular region)|GO:0005578(proteinaceous extracellular matrix)|GO:0006508(proteolysis)|GO:0008233(peptidase activity)|GO:0008237(metallopeptidase activity)|GO:0008270(zinc ion binding)|GO:0016787(hydrolase activity)|GO:0031012(extracellular matrix)|GO:0042742(defense response to bacterium)|GO:0046872(metal ion binding)	GGACACATTGCAATACAGGTCCATTCATTATTAAGCTAATGCACAGGAATAAAAATCAGT	11096	ADAMTS5	0
A_55_P1970826	Adamts5	a disintegrin-like and metallopeptidase (reprolysin type) with thrombospondin type 1 motif, 5 (aggrecanase-2)	Mus musculus a disintegrin-like and metallopeptidase (reprolysin type) with thrombospondin type 1 motif, 5 (aggrecanase-2) (Adamts5), mRNA [NM_011782]	NM_011782	NM_011782	23794	chr16	85899509	85899450	-	44021	58	192	A_55_P1970826	FALSE	Mm.112933	ENSMUST00000023611		ref|NM_011782|ens|ENSMUST00000023611|ref|XM_011246127|gb|BC138619	chr16:085899509-085899450	mm|16qC3.3	GO:0004222(metalloendopeptidase activity)|GO:0005576(extracellular region)|GO:0005578(proteinaceous extracellular matrix)|GO:0006508(proteolysis)|GO:0008233(peptidase activity)|GO:0008237(metallopeptidase activity)|GO:0008270(zinc ion binding)|GO:0016787(hydrolase activity)|GO:0031012(extracellular matrix)|GO:0042742(defense response to bacterium)|GO:0046872(metal ion binding)	CCACGACCCTCAAGAACTTTTGCAAATGGCAGCACCAACATAACCAGCTAGGGGATGATC	11096	ADAMTS5	0
A_55_P1961451	Adamts7	a disintegrin-like and metallopeptidase (reprolysin type) with thrombospondin type 1 motif, 7	Mus musculus a disintegrin-like and metallopeptidase (reprolysin type) with thrombospondin type 1 motif, 7 (Adamts7), mRNA [NM_001003911]	NM_001003911	NM_001003911	108153	chr9	90094878	90094937	+	19151	134	76	A_55_P1961451	FALSE	Mm.102141	ENSMUST00000113059		ref|NM_001003911|ens|ENSMUST00000113059|ens|ENSMUST00000134996|ens|ENSMUST00000113060	chr9:090094878-090094937	mm|9qE3.1	GO:0004222(metalloendopeptidase activity)|GO:0005576(extracellular region)|GO:0005578(proteinaceous extracellular matrix)|GO:0006508(proteolysis)|GO:0008233(peptidase activity)|GO:0008237(metallopeptidase activity)|GO:0008270(zinc ion binding)|GO:0009986(cell surface)|GO:0016787(hydrolase activity)|GO:0031012(extracellular matrix)|GO:0032331(negative regulation of chondrocyte differentiation)|GO:…	TTTTATTCTAACAGTTTGCACATTTGTTATTATTTTACATAAATGAGTATCTACCCTTTC	11173	ADAMTS7	0
A_55_P2005833	Adamts8	a disintegrin-like and metallopeptidase (reprolysin type) with thrombospondin type 1 motif, 8	Mus musculus a disintegrin-like and metallopeptidase (reprolysin type) with thrombospondin type 1 motif, 8 (Adamts8), mRNA [NM_013906]	NM_013906	NM_013906	30806	chr9	30770384	30770443	+	56714	20	61	A_55_P2005833	FALSE	Mm.100582	ENSMUST00000163037		ref|NM_013906|ens|ENSMUST00000163037|ens|ENSMUST00000068135|gb|AK043875	chr9:030770384-030770443	mm|9qA4	GO:0004222(metalloendopeptidase activity)|GO:0005576(extracellular region)|GO:0005578(proteinaceous extracellular matrix)|GO:0006508(proteolysis)|GO:0008201(heparin binding)|GO:0008233(peptidase activity)|GO:0008237(metallopeptidase activity)|GO:0008270(zinc ion binding)|GO:0016787(hydrolase activity)|GO:0031012(extracellular matrix)|GO:0046872(metal ion binding)	ACCCATTTCAAGTATTTATGCAAATATGTCTCCGAACTAAAGTGTGATCTTACACCAATG	11095	ADAMTS8	0
A_52_P49321	Adamts9	a disintegrin-like and metallopeptidase (reprolysin type) with thrombospondin type 1 motif, 9	Mus musculus a disintegrin-like and metallopeptidase (reprolysin type) with thrombospondin type 1 motif, 9 (Adamts9), mRNA [NM_175314]	NM_175314	NM_175314	101401	chr6	92723110	92723051	-	53873	28	168	A_52_P49321	FALSE	Mm.257557	ENSMUST00000167391		ref|NM_175314|ens|ENSMUST00000167391|ens|ENSMUST00000113438|ref|XM_006505260	chr6:092723110-092723051	mm|6qD1	GO:0004175(endopeptidase activity)|GO:0005578(proteinaceous extracellular matrix)|GO:0005615(extracellular space)|GO:0006508(proteolysis)|GO:0008237(metallopeptidase activity)|GO:0045636(positive regulation of melanocyte differentiation)|GO:0048070(regulation of developmental pigmentation)	TCAGCATACTCAGAGAACGACAGGAGATCGACCACCTTTTACCTGAAAACTTTGGCCAAT	56999	ADAMTS9	0
A_55_P2006525	Adamtsl4	ADAMTS-like 4	Mus musculus ADAMTS-like 4 (Adamtsl4), transcript variant 1, mRNA [NM_001301705]	NM_001301705	NM_001301705	229595	chr3	95480194	95480135	-	23202	122	173	A_55_P2006525	FALSE	Mm.490574	ENSMUST00000015994		ref|NM_001301705|ref|NM_144899|ens|ENSMUST00000015994|ens|ENSMUST00000117782	chr3:095480194-095480135	mm|3qF2.1	GO:0002020(protease binding)|GO:0004222(metalloendopeptidase activity)|GO:0005576(extracellular region)|GO:0005578(proteinaceous extracellular matrix)|GO:0005614(interstitial matrix)|GO:0006915(apoptotic process)|GO:0008233(peptidase activity)|GO:0030198(extracellular matrix organization)|GO:0031012(extracellular matrix)|GO:0043065(positive regulation of apoptotic process)	CCACTTCACACTGAAAATGATGCCCACCCCAGAAGTAATTTATTTTTTATTAAAGTTGGT	54507	ADAMTSL4	0
A_52_P407280	Adamtsl5	ADAMTS-like 5	Mus musculus ADAMTS-like 5 (Adamtsl5), transcript variant 1, mRNA [NM_001285435]	NM_001285435	NM_001285435	66548	chr10	79804136	79804077	-	45615	53	284	A_52_P407280	FALSE	Mm.268527	ENSMUST00000137576		ref|NM_001285435|ref|NR_104339|ref|NR_104340|ens|ENSMUST00000137576	chr10:079804136-079804077	mm|10qC1	GO:0001527(microfibril)|GO:0005576(extracellular region)|GO:0005578(proteinaceous extracellular matrix)|GO:0008150(biological_process)|GO:0008201(heparin binding)	TTGCTCATCTACAAAAGCCGCACGCCTCTGCGTACTCGAGAATATGTATGGGCACCAGGC	339366	ADAMTSL5	0
A_55_P2074636	Adap1	ArfGAP with dual PH domains 1	Mus musculus ArfGAP with dual PH domains 1 (Adap1), mRNA [NM_172723]	NM_172723	NM_172723	231821	chr5	139747890	139747831	-	31913	95	136	A_55_P2074636	FALSE	Mm.297819	ENSMUST00000151450		ref|NM_172723|ens|ENSMUST00000151450|ref|XM_006504669|gb|AK076768	chr5:139747890-139747831	mm|5qG2	GO:0005096(GTPase activator activity)|GO:0005547(phosphatidylinositol-3,4,5-trisphosphate binding)|GO:0005634(nucleus)|GO:0005737(cytoplasm)|GO:0005886(plasma membrane)|GO:0043087(regulation of GTPase activity)|GO:0043547(positive regulation of GTPase activity)	AGTTGGGCTTCTGCTGCCCTGTGTCATGTCCCCTGGAATAAAGTGTGGCTCTGGCGTTGT	11033	ADAP1	0
A_51_P464710	Adap2	ArfGAP with dual PH domains 2	Mus musculus ArfGAP with dual PH domains 2 (Adap2), mRNA [NM_172133]	NM_172133	NM_172133	216991	chr11	79991925	79991984	+	22321	124	296	A_51_P464710	FALSE	Mm.341520	ENSMUST00000021050		ref|NM_172133|ens|ENSMUST00000021050|gb|AK140864|gb|BC027165	chr11:079991925-079991984	mm|11qB5	GO:0005096(GTPase activator activity)|GO:0005545(1-phosphatidylinositol binding)|GO:0005546(phosphatidylinositol-4,5-bisphosphate binding)|GO:0005547(phosphatidylinositol-3,4,5-trisphosphate binding)|GO:0005737(cytoplasm)|GO:0005740(mitochondrial envelope)|GO:0005829(cytosol)|GO:0005886(plasma membrane)|GO:0007507(heart development)|GO:0016020(membrane)|GO:0043325(phosphatidylinositol-3,4-bisphos…	TGGGGTGACCCATCTCGGAGGATCTGGCTGGCTACTGTGCATCTGAAGTTCTGGAGAAGT	55803	ADAP2	0
A_55_P2077483	Adarb2	adenosine deaminase, RNA-specific, B2	Mus musculus adenosine deaminase, RNA-specific, B2 (Adarb2), transcript variant 1, mRNA [NM_052977]	NM_052977	NM_052977	94191	chr13	8759495	8759554	+	42191	64	243	A_55_P2077483	FALSE	Mm.425794			ref|NM_052977|ref|NM_001289530|gb|AK139079|gb|AK139273	chr13:008759495-008759554	mm|13qA1	GO:0003723(RNA binding)|GO:0004000(adenosine deaminase activity)|GO:0005634(nucleus)|GO:0006396(RNA processing)|GO:0006397(mRNA processing)|GO:0016787(hydrolase activity)|GO:0046872(metal ion binding)	TTGACTGTCTTGCAAGATACCTGTCAGGGTGAATGTAAAATAAAGGAGATGGGAGGAAGG	105	ADARB2	0
A_55_P2182412	Adat1	adenosine deaminase, tRNA-specific 1	Mus musculus adenosine deaminase, tRNA-specific 1 (Adat1), mRNA [NM_013925]	NM_013925	NM_013925	30947	chr8	114490889	114490830	-	40460	69	98	A_55_P2182412	FALSE	Mm.282162	ENSMUST00000034427		ref|NM_013925|ens|ENSMUST00000034427|ref|XM_006531075|gb|AK082399	chr8:114490889-114490830	mm|8qE1	GO:0003723(RNA binding)|GO:0004000(adenosine deaminase activity)|GO:0005575(cellular_component)|GO:0006396(RNA processing)|GO:0008033(tRNA processing)|GO:0008251(tRNA-specific adenosine deaminase activity)|GO:0016787(hydrolase activity)|GO:0046872(metal ion binding)	GAGTGCTGAGATTAAAGTTGTGTGCCACCATGCAGTGTTCTTTTATGAGATTTTTATATT	23536	ADAT1	0
A_55_P2182392	Adat3	adenosine deaminase, tRNA-specific 3	Mus musculus adenosine deaminase, tRNA-specific 3 (Adat3), mRNA [NM_001100606]	NM_001100606	NM_001100606	100113398	chr10	80070339	80070398	+	26043	113	68	A_55_P2182392	FALSE	Mm.273170	ENSMUST00000038411		ref|NM_001100606|ens|ENSMUST00000038411|gb|AK020747|tc|TC1601721	chr10:080070339-080070398	mm|10qC1	GO:0003674(molecular_function)|GO:0003824(catalytic activity)|GO:0005575(cellular_component)|GO:0008033(tRNA processing)|GO:0008150(biological_process)|GO:0008270(zinc ion binding)|GO:0016787(hydrolase activity)|GO:0046872(metal ion binding)	GTCCTCCAGGCTCGGGGCAGGGAGCAGCCATCGAGTGTGAAAATAAAACACCTCAAACCA	113179	ADAT3	0
A_51_P221651	Adck3	aarF domain containing kinase 3	Mus musculus aarF domain containing kinase 3 (Adck3), transcript variant 1, mRNA [NM_023341]	NM_023341	NM_023341	67426	chr1	182097263	182097204	-	32366	94	213	A_51_P221651	FALSE	Mm.38330	ENSMUST00000027766		ref|NM_023341|ref|NM_001163290|ens|ENSMUST00000027766|ens|ENSMUST00000170472	chr1:182097263-182097204	mm|1qH4	GO:0000166(nucleotide binding)|GO:0005524(ATP binding)|GO:0005739(mitochondrion)|GO:0006744(ubiquinone biosynthetic process)|GO:0016020(membrane)|GO:0016021(integral to membrane)|GO:0016301(kinase activity)|GO:0016310(phosphorylation)|GO:0016740(transferase activity)|GO:0016772(transferase activity, transferring phosphorus-containing groups)|GO:0043531(ADP binding)	TCCTTCAGGCTCAGTCAAGCAGAGGGAGGACGTTGAAAGGGAGCCACGGCCTCTATGAAT	56997	ADCK3	0
A_51_P196718	Adcy1	adenylate cyclase 1	Mus musculus adenylate cyclase 1 (Adcy1), mRNA [NM_009622]	NM_009622	NM_009622	432530	chr11	7077699	7077755	+	32059	95	171	A_51_P196718	FALSE	Mm.259733	ENSMUST00000020706		ref|NM_009622|ens|ENSMUST00000020706|gb|AK139971|tc|TC1713536	chr11:007077699-007077755	mm|11qA1	GO:0000166(nucleotide binding)|GO:0004016(adenylate cyclase activity)|GO:0005516(calmodulin binding)|GO:0005524(ATP binding)|GO:0005634(nucleus)|GO:0005737(cytoplasm)|GO:0005886(plasma membrane)|GO:0006171(cAMP biosynthetic process)|GO:0007190(activation of adenylate cyclase activity)|GO:0007409(axonogenesis)|GO:0007616(long-term memory)|GO:0008294(calcium- and calmodulin-responsive adenylate cyc…	GCACTACGGAATTGCATGCCTTGAAATTCCTTACTGTGTGCACCTTAGTTTGAATTTTGA	107	ADCY1	0
A_51_P337523	Adcy2	adenylate cyclase 2	Mus musculus adenylate cyclase 2 (Adcy2), mRNA [NM_153534]	NM_153534	NM_153534	210044	chr13	68759728	68759669	-	47935	46	236	A_51_P337523	FALSE	Mm.390617	ENSMUST00000022013		ref|NM_153534|ens|ENSMUST00000022013|gb|AK122432|gb|BC037107	chr13:068759728-068759669	mm|13qB3	GO:0000166(nucleotide binding)|GO:0004016(adenylate cyclase activity)|GO:0005524(ATP binding)|GO:0005622(intracellular)|GO:0005737(cytoplasm)|GO:0005886(plasma membrane)|GO:0006171(cAMP biosynthetic process)|GO:0007188(adenylate cyclase-modulating G-protein coupled receptor signaling pathway)|GO:0007190(activation of adenylate cyclase activity)|GO:0008179(adenylate cyclase binding)|GO:0008294(cal…	ATCCTGCAGACGCTTGGCTACACGTGTACATGTCGAGGTATCATCAACGTGAAGGGGAAA	108	ADCY2	0
A_51_P484671	Adcy3	adenylate cyclase 3	Mus musculus adenylate cyclase 3 (Adcy3), transcript variant 1, mRNA [NM_138305]	NM_138305	NM_138305	104111	chr12	4211535	4211594	+	61083	6	180	A_51_P484671	FALSE	Mm.489807	ENSMUST00000127756		ref|NM_138305|ref|NM_001159537|ref|NM_001159536|ens|ENSMUST00000127756	chr12:004211535-004211594	mm|12qA1.1	GO:0000166(nucleotide binding)|GO:0004016(adenylate cyclase activity)|GO:0005515(protein binding)|GO:0005516(calmodulin binding)|GO:0005524(ATP binding)|GO:0005634(nucleus)|GO:0005737(cytoplasm)|GO:0005886(plasma membrane)|GO:0005929(cilium)|GO:0006171(cAMP biosynthetic process)|GO:0007190(activation of adenylate cyclase activity)|GO:0007608(sensory perception of smell)|GO:0008294(calcium- and ca…	TGCATTAGCCATGAAGGACACGCTCACAAACATCAACAACCAGTCATTCAACAACTTCAT	109	ADCY3	0
A_51_P229911	Adcy4	adenylate cyclase 4	Mus musculus adenylate cyclase 4 (Adcy4), mRNA [NM_080435]	NM_080435	NM_080435	104110	chr14	56388063	56388004	-	56172	21	162	A_51_P229911	FALSE	Mm.287010	ENSMUST00000002398		ref|NM_080435|ens|ENSMUST00000002398|ens|ENSMUST00000170223|ref|XM_006518323	chr14:056388063-056388004	mm|14qC3	GO:0000166(nucleotide binding)|GO:0004016(adenylate cyclase activity)|GO:0005524(ATP binding)|GO:0005622(intracellular)|GO:0005737(cytoplasm)|GO:0005886(plasma membrane)|GO:0006171(cAMP biosynthetic process)|GO:0007188(adenylate cyclase-modulating G-protein coupled receptor signaling pathway)|GO:0007190(activation of adenylate cyclase activity)|GO:0009190(cyclic nucleotide biosynthetic process)|G…	GCATCAAGGTCAAAGGCAAAGGGGAACTCTGTACCTACTTCCTGAACACAGACCTGACGC	196883	ADCY4	0
A_52_P586141	Adcy7	adenylate cyclase 7	Mus musculus adenylate cyclase 7 (Adcy7), transcript variant 3, mRNA [NM_001037724]	NM_001037724	NM_001037724	11513	chr8	90853657	90853716	+	50798	38	85	A_52_P586141	FALSE	Mm.288206			ref|NM_001037724|ref|NM_007406|ref|NM_001037723|ref|NM_001109756	chr8:090853657-090853716	mm|8qC3	GO:0000166(nucleotide binding)|GO:0004016(adenylate cyclase activity)|GO:0005524(ATP binding)|GO:0005886(plasma membrane)|GO:0006171(cAMP biosynthetic process)|GO:0007190(activation of adenylate cyclase activity)|GO:0009190(cyclic nucleotide biosynthetic process)|GO:0016020(membrane)|GO:0016021(integral to membrane)|GO:0016829(lyase activity)|GO:0016849(phosphorus-oxygen lyase activity)|GO:003081…	ACACTTCCTGACAAAGTGATTGTTACTGTGTACTTCATAGATGACAGGTCAATGCTCCGA	113	ADCY7	0
A_51_P303061	Adcy8	adenylate cyclase 8	Mus musculus adenylate cyclase 8 (Adcy8), transcript variant 1, mRNA [NM_009623]	NM_009623	NM_009623	11514	chr15	64530998	64530939	-	57484	17	162	A_51_P303061	FALSE	Mm.1425	ENSMUST00000023007		ref|NM_009623|ref|NM_001291903|ens|ENSMUST00000023007|ref|XM_006520319	chr15:064530998-064530939	mm|15qD1	GO:0000166(nucleotide binding)|GO:0004016(adenylate cyclase activity)|GO:0005516(calmodulin binding)|GO:0005524(ATP binding)|GO:0005622(intracellular)|GO:0005886(plasma membrane)|GO:0006171(cAMP biosynthetic process)|GO:0007189(adenylate cyclase-activating G-protein coupled receptor signaling pathway)|GO:0007616(long-term memory)|GO:0008022(protein C-terminus binding)|GO:0008294(calcium- and calm…	GGAGATATATGTGAAGGGCATCAGTGAACAAGAAGGGAAAATCAAAACATACTTTCTCCT	114	ADCY8	0
A_52_P425667	Adcyap1	adenylate cyclase activating polypeptide 1	Mus musculus adenylate cyclase activating polypeptide 1 (Adcyap1), mRNA [NM_009625]	NM_009625	NM_009625	11516	chr17	93604401	93604460	+	21995	125	292	A_52_P425667	FALSE	Mm.3407	ENSMUST00000064775		ref|NM_009625|ens|ENSMUST00000064775|gb|BC057344|gb|AK142765	chr17:093604401-093604460	mm|17qE5	GO:0001541(ovarian follicle development)|GO:0001662(behavioral fear response)|GO:0001821(histamine secretion)|GO:0002865(negative regulation of acute inflammatory response to antigenic stimulus)|GO:0002878(negative regulation of acute inflammatory response to non-antigenic stimulus)|GO:0005057(receptor signaling protein activity)|GO:0005102(receptor binding)|GO:0005179(hormone activity)|GO:000518…	GTTCCACTGCCTGACAGATCAGGTGCTGGTGTTGGAATGAATGCAAAGTACAATGTGTTT	116	ADCYAP1	0
A_51_P462102	Adgra2	adhesion G protein-coupled receptor A2	Mus musculus adhesion G protein-coupled receptor A2 (Adgra2), mRNA [NM_133911]	NM_133911	NM_133911	70693	chr5	50351473	50351414	-	573	191	167	A_51_P462102	FALSE	Mm.272974	ENSMUST00000030971		ref|NM_133911|ens|ENSMUST00000030971|gb|BC052391|gb|AK028929	chr5:050351473-050351414	mm|5qB3	GO:0004871(signal transducer activity)|GO:0004888(transmembrane signaling receptor activity)|GO:0004930(G-protein coupled receptor activity)|GO:0005886(plasma membrane)|GO:0007165(signal transduction)|GO:0007166(cell surface receptor signaling pathway)|GO:0007186(G-protein coupled receptor signaling pathway)|GO:0009897(external side of plasma membrane)|GO:0016020(membrane)|GO:0016021(integral to …	ACTCACATTCCTTTAAGCTATGAACTCTTAGAAACAAACTGTTTACAGCCACCTTGGGGA	166647	ADGRA3	0
A_55_P2173832	Adgra2	adhesion G protein-coupled receptor A2	Mus musculus adhesion G protein-coupled receptor A2 (Adgra2), mRNA [NM_133911]	NM_133911	NM_133911	70693	chr5	50393207	50393148	-	10553	160	216	A_55_P2173832	FALSE	Mm.272974	ENSMUST00000030971		ref|NM_133911|ens|ENSMUST00000030971|gb|AK028929|gb|BC052391	chr5:050393207-050393148	mm|5qB3	GO:0004871(signal transducer activity)|GO:0004888(transmembrane signaling receptor activity)|GO:0004930(G-protein coupled receptor activity)|GO:0005886(plasma membrane)|GO:0007165(signal transduction)|GO:0007166(cell surface receptor signaling pathway)|GO:0007186(G-protein coupled receptor signaling pathway)|GO:0009897(external side of plasma membrane)|GO:0016020(membrane)|GO:0016021(integral to …	TCATGTTCAGACGAAACGTGGGAATAACACAAGAACTGTTGACATTGTGGTATTAGAAAG	166647	ADGRA3	0
A_52_P313217	Adgrd1	adhesion G protein-coupled receptor D1	Mus musculus adhesion G protein-coupled receptor D1 (Adgrd1), mRNA [NM_001081342]	NM_001081342	NM_001081342	243277	chr5	129710198	129710257	+	20693	129	272	A_52_P313217	FALSE	Mm.440501	ENSMUST00000056617		ref|NM_001081342|ens|ENSMUST00000056617|ref|XM_006504307|ref|XM_006504308	chr5:129710198-129710257	mm|5qG1.3	GO:0004888(transmembrane signaling receptor activity)|GO:0004930(G-protein coupled receptor activity)|GO:0005886(plasma membrane)|GO:0007166(cell surface receptor signaling pathway)|GO:0007186(G-protein coupled receptor signaling pathway)|GO:0010579(positive regulation of adenylate cyclase activity involved in G-protein coupled receptor signaling pathway)|GO:0016020(membrane)|GO:0016021(integral …	TTTTTTAATACTCGCTCTTATGTAGCTGATATATCAAGGGAAGTCAAGAGCAAAACCTGT	283383	ADGRD1	0
A_55_P2018934	Adgre1	adhesion G protein-coupled receptor E1	Mus musculus adhesion G protein-coupled receptor E1 (Adgre1), mRNA [NM_010130]	NM_010130	NM_010130	13733	chr17	57620350	57620409	+	23914	120	61	A_55_P2018934	FALSE	Mm.2254	ENSMUST00000004850		ref|NM_010130|ens|ENSMUST00000004850|ens|ENSMUST00000086763|ref|XM_006523601	chr17:057620350-057620409	mm|17qD	GO:0004871(signal transducer activity)|GO:0004888(transmembrane signaling receptor activity)|GO:0004930(G-protein coupled receptor activity)|GO:0005509(calcium ion binding)|GO:0005886(plasma membrane)|GO:0007165(signal transduction)|GO:0007166(cell surface receptor signaling pathway)|GO:0007186(G-protein coupled receptor signaling pathway)|GO:0009897(external side of plasma membrane)|GO:0016020(m…	ATGAATATAAGAAACTCCTCACCAGGAAGACTGACCTTAGCTCCCATTCCCAGACTTCTG	2015	ADGRE1	0
A_55_P2144386	Adgre1	adhesion G protein-coupled receptor E1	Mus musculus adhesion G protein-coupled receptor E1 (Adgre1), mRNA [NM_010130]	NM_010130	NM_010130	13733	chr17	57622868	57622927	+	55961	22	255	A_55_P2144386	FALSE	Mm.2254	ENSMUST00000086763		ref|NM_010130|ens|ENSMUST00000086763|ens|ENSMUST00000004850|ref|XM_011246272	chr17:057622868-057622927	mm|17qD	GO:0004871(signal transducer activity)|GO:0004888(transmembrane signaling receptor activity)|GO:0004930(G-protein coupled receptor activity)|GO:0005509(calcium ion binding)|GO:0005886(plasma membrane)|GO:0007165(signal transduction)|GO:0007166(cell surface receptor signaling pathway)|GO:0007186(G-protein coupled receptor signaling pathway)|GO:0009897(external side of plasma membrane)|GO:0016020(m…	GGTGTTCCAGAAATTCTCATTTAATACCCATCAAGCAGTAAACACAGACTAACTCTTAAT	2015	ADGRE1	0
A_51_P286357	Adgre4	adhesion G protein-coupled receptor E4	Mus musculus adhesion G protein-coupled receptor E4 (Adgre4), mRNA [NM_139138]	NM_139138	NM_139138	52614	chr17	55992348	55992407	+	52816	31	314	A_51_P286357	FALSE	Mm.210497	ENSMUST00000025004		ref|NM_139138|ens|ENSMUST00000025004|gb|AK037483|gb|AK036459	chr17:055992348-055992407	mm|17qD	GO:0004871(signal transducer activity)|GO:0004888(transmembrane signaling receptor activity)|GO:0004930(G-protein coupled receptor activity)|GO:0005509(calcium ion binding)|GO:0005886(plasma membrane)|GO:0005887(integral to plasma membrane)|GO:0007165(signal transduction)|GO:0007166(cell surface receptor signaling pathway)|GO:0007173(epidermal growth factor receptor signaling pathway)|GO:0007186(…	AAAGCCTATATGCATCTTAGGAAGTATGTACCTTGATACACCTTTATTGGAATATCATCC			0
A_55_P2007022	Adgre5	adhesion G protein-coupled receptor E5	Mus musculus adhesion G protein-coupled receptor E5 (Adgre5), transcript variant 1, mRNA [NM_011925]	NM_011925	NM_011925	26364	chr8	86247379	86247320	-	55645	23	231	A_55_P2007022	FALSE	Mm.334648			ref|NM_011925|ref|NM_001163030|ref|NM_001163029|ref|NM_001163031	chr8:086247379-086247320	mm|8qC2	GO:0004871(signal transducer activity)|GO:0004888(transmembrane signaling receptor activity)|GO:0004930(G-protein coupled receptor activity)|GO:0005509(calcium ion binding)|GO:0005886(plasma membrane)|GO:0005925(focal adhesion)|GO:0007155(cell adhesion)|GO:0007165(signal transduction)|GO:0007166(cell surface receptor signaling pathway)|GO:0007186(G-protein coupled receptor signaling pathway)|GO:0…	CGCTGCTCCACATCCAGGGCAGAAGGTCTCACAGCTAAAGACTAGGTTTTGTAATTTTTT	976	ADGRE5	0
A_55_P1984307	Adgrf5	adhesion G protein-coupled receptor F5	Mus musculus adhesion G protein-coupled receptor F5 (Adgrf5), mRNA [NM_001081178]	NM_001081178	NM_001081178	224792	chr17	43596447	43596506	+	5209	177	79	A_55_P1984307	FALSE	Mm.23478	ENSMUST00000113599		ref|NM_001081178|ens|ENSMUST00000113599|gb|AK034382|tc|TC1677668	chr17:043596447-043596506	mm|17qB3	GO:0003674(molecular_function)|GO:0006112(energy reserve metabolic process)|GO:0009986(cell surface)|GO:0019216(regulation of lipid metabolic process)|GO:0031410(cytoplasmic vesicle)|GO:0042593(glucose homeostasis)|GO:0043129(surfactant homeostasis)|GO:0045444(fat cell differentiation)	ATATCAGTGTATTAGTGATGCTGTCTTTCCTCATAATAAAATACCTAATGATTTGCCCGG	221395	ADGRF5	0
A_52_P317393	Adgrg1	adhesion G protein-coupled receptor G1	Mus musculus adhesion G protein-coupled receptor G1 (Adgrg1), transcript variant 2, mRNA [NM_018882]	NM_018882	NM_018882	14766	chr8	97537978	97538037	+	34325	88	231	A_52_P317393	FALSE	Mm.290834	ENSMUST00000179619		ref|NM_018882|ref|NM_001198894|ens|ENSMUST00000179619|ens|ENSMUST00000093271	chr8:097537978-097538037	mm|8qD1	GO:0001525(angiogenesis)|GO:0004871(signal transducer activity)|GO:0004888(transmembrane signaling receptor activity)|GO:0004930(G-protein coupled receptor activity)|GO:0005518(collagen binding)|GO:0005576(extracellular region)|GO:0005622(intracellular)|GO:0005886(plasma membrane)|GO:0007155(cell adhesion)|GO:0007165(signal transduction)|GO:0007166(cell surface receptor signaling pathway)|GO:0007…	TACCAGTTCATTTGTCTTTTGATATTAAAGCTCTTTATAGAGAGTCTGGAAACTGTAGGC	9289	ADGRG1	0
A_55_P2389900	Adgrg2	adhesion G protein-coupled receptor G2	Mus musculus adhesion G protein-coupled receptor G2 (Adgrg2), transcript variant 1, mRNA [NM_178712]	NM_178712	NM_178712	237175	chrX	156934689	156934748	+	25180	116	153	A_55_P2389900	FALSE	Mm.213016			ref|NM_178712|ref|NM_001290446|ref|NM_001079857|ref|NM_001290445	chrX:156934689-156934748	mm|XqF4	GO:0004871(signal transducer activity)|GO:0004888(transmembrane signaling receptor activity)|GO:0004930(G-protein coupled receptor activity)|GO:0005886(plasma membrane)|GO:0007165(signal transduction)|GO:0007166(cell surface receptor signaling pathway)|GO:0007186(G-protein coupled receptor signaling pathway)|GO:0009986(cell surface)|GO:0016020(membrane)|GO:0016021(integral to membrane)|GO:0016324…	TTTGTTTCCACTCACATTTTAAAGAGGCTGTTATCCTTGATAACATCCTAAGAAAGAAGG	10149	ADGRG2	0
A_51_P247694	Adgrg3	adhesion G protein-coupled receptor G3	Mus musculus adhesion G protein-coupled receptor G3 (Adgrg3), mRNA [NM_173036]	NM_173036	NM_173036	54672	chr8	97568989	97569048	+	13038	153	165	A_51_P247694	FALSE	Mm.27995	ENSMUST00000051259		ref|NM_173036|ens|ENSMUST00000051259|ref|XM_006531200|ref|XM_006531198	chr8:097568989-097569048	mm|8qD1	GO:0004871(signal transducer activity)|GO:0004888(transmembrane signaling receptor activity)|GO:0004930(G-protein coupled receptor activity)|GO:0005886(plasma membrane)|GO:0005887(integral to plasma membrane)|GO:0007165(signal transduction)|GO:0007166(cell surface receptor signaling pathway)|GO:0007186(G-protein coupled receptor signaling pathway)|GO:0016020(membrane)|GO:0016021(integral to membr…	CCAAGGGGGAAAAGGGAGAAAAAGCAGCTCTTCCCACGACGTCTGTACTCTTATGGGACA	222487	ADGRG3	0
A_55_P2156638	Adgrg5	adhesion G protein-coupled receptor G5	Mus musculus adhesion G protein-coupled receptor G5 (Adgrg5), transcript variant 1, mRNA [NM_001145972]	NM_001145972	NM_001145972	382045	chr8	97467119	97467178	+	11946	156	54	A_55_P2156638	FALSE	Mm.334726	ENSMUST00000128308		ref|NM_001145972|ref|NM_001033468|ens|ENSMUST00000128308|ens|ENSMUST00000074570	chr8:097467119-097467178	mm|8qD1	GO:0004871(signal transducer activity)|GO:0004888(transmembrane signaling receptor activity)|GO:0004930(G-protein coupled receptor activity)|GO:0005886(plasma membrane)|GO:0007165(signal transduction)|GO:0007166(cell surface receptor signaling pathway)|GO:0007186(G-protein coupled receptor signaling pathway)|GO:0016020(membrane)|GO:0016021(integral to membrane)	ATCCACAGCGAGGACAATAGTAGTAACTCTTTGGAAGATTCAATAAAAGAAAGAATTCAC	221188	ADGRG5	0
A_66_P114451	Adgrg6	adhesion G protein-coupled receptor G6	Mus musculus adhesion G protein-coupled receptor G6 (Adgrg6), mRNA [NM_001002268]	NM_001002268	NM_001002268	215798	chr10	14122494	14122435	-	41991	64	316	A_66_P114451	FALSE	Mm.440142	ENSMUST00000041168		ref|NM_001002268|ens|ENSMUST00000041168|ref|XM_006512679|ref|XM_006512678	chr10:014122494-014122435	mm|10qA2	GO:0004871(signal transducer activity)|GO:0004888(transmembrane signaling receptor activity)|GO:0004930(G-protein coupled receptor activity)|GO:0005737(cytoplasm)|GO:0005886(plasma membrane)|GO:0007165(signal transduction)|GO:0007166(cell surface receptor signaling pathway)|GO:0007186(G-protein coupled receptor signaling pathway)|GO:0009986(cell surface)|GO:0016020(membrane)|GO:0016021(integral t…	GCAAACTAGAATTAGTAGTGAGAAACTGCTAAAGCTGATTTGCCATTTTACTGAAATGGA	57211	ADGRG6	0
A_55_P1989956	Adgrl2	adhesion G protein-coupled receptor L2	Mus musculus adhesion G protein-coupled receptor L2 (Adgrl2), mRNA [NM_001081298]	NM_001081298	NM_001081298	99633	chr3	148478677	148478618	-	680	190	282	A_55_P1989956	FALSE	Mm.9776	ENSMUST00000106128		ref|NM_001081298|ens|ENSMUST00000106128|gb|AK034430|tc|TC1615910	chr3:148478677-148478618	mm|3qH3	GO:0004871(signal transducer activity)|GO:0004888(transmembrane signaling receptor activity)|GO:0004930(G-protein coupled receptor activity)|GO:0005886(plasma membrane)|GO:0007165(signal transduction)|GO:0007166(cell surface receptor signaling pathway)|GO:0007186(G-protein coupled receptor signaling pathway)|GO:0016020(membrane)|GO:0016021(integral to membrane)|GO:0030165(PDZ domain binding)|GO:0…	GCTTATCCTTTGCAGTGAGAAGAATAGATTTGTATCCTAATTATCTCTCATACAGAGACA	23266	ADGRL2	0
A_55_P2122150	Adgrl3	adhesion G protein-coupled receptor L3	Mus musculus adhesion G protein-coupled receptor L3 (Adgrl3), mRNA [NM_198702]	NM_198702	NM_198702	319387	chr5	82224165	82224224	+	37144	79	170	A_55_P2122150	FALSE	Mm.273631	ENSMUST00000117407		ref|NM_198702|ens|ENSMUST00000117407|gb|BC088989|gb|BC058992	chr5:082224165-082224224	mm|5qE1	GO:0004871(signal transducer activity)|GO:0004888(transmembrane signaling receptor activity)|GO:0004930(G-protein coupled receptor activity)|GO:0005886(plasma membrane)|GO:0007165(signal transduction)|GO:0007166(cell surface receptor signaling pathway)|GO:0007186(G-protein coupled receptor signaling pathway)|GO:0016020(membrane)|GO:0016021(integral to membrane)|GO:0030246(carbohydrate binding)|GO…	ATCGTGTGTACTCCGACATCTGATGCTGTTCTCGAAAGAGAGACTCTCTGACAATTTTTT	23284	ADGRL3	0
A_51_P480328	Adgrl4	adhesion G protein-coupled receptor L4	Mus musculus adhesion G protein-coupled receptor L4 (Adgrl4), mRNA [NM_133222]	NM_133222	NM_133222	170757	chr3	151207470	151207529	+	59868	10	313	A_51_P480328	FALSE	Mm.317261	ENSMUST00000046977		ref|NM_133222|ens|ENSMUST00000046977|gb|AF385682|tc|TC1579650	chr3:151207470-151207529	mm|3qH3	GO:0004871(signal transducer activity)|GO:0004888(transmembrane signaling receptor activity)|GO:0004930(G-protein coupled receptor activity)|GO:0005509(calcium ion binding)|GO:0005886(plasma membrane)|GO:0007165(signal transduction)|GO:0007166(cell surface receptor signaling pathway)|GO:0007186(G-protein coupled receptor signaling pathway)|GO:0016020(membrane)|GO:0016021(integral to membrane)|GO:…	ACAGCATAATTCAATCTACTGGACATTGCAATTTTAATTCTTGTGCTGTTGAATGAAGCC	64123	ADGRL4	0
A_51_P389539	Adgrv1	adhesion G protein-coupled receptor V1	Mus musculus adhesion G protein-coupled receptor V1 (Adgrv1), mRNA [NM_054053]	NM_054053	NM_054053	110789	chr13	81234389	81234330	-	47334	48	126	A_51_P389539	FALSE	Mm.288694	ENSMUST00000125698		ref|NM_054053|ens|ENSMUST00000125698|ens|ENSMUST00000095585|ref|XM_011244458	chr13:081234389-081234330	mm|13qC3	GO:0002141(stereocilia ankle link)|GO:0002142(stereocilia ankle link complex)|GO:0004871(signal transducer activity)|GO:0004888(transmembrane signaling receptor activity)|GO:0004930(G-protein coupled receptor activity)|GO:0005509(calcium ion binding)|GO:0005515(protein binding)|GO:0005576(extracellular region)|GO:0005737(cytoplasm)|GO:0005886(plasma membrane)|GO:0007154(cell communication)|GO:000…	ACCTCTGAGAGTCCCATTTACACTCTCCAGTAGAAAGAGGACAAGTTTCCTCATTGCCTT	84059	ADGRV1	0
A_52_P629895	Adh1	alcohol dehydrogenase 1 (class I)	Mus musculus alcohol dehydrogenase 1 (class I) (Adh1), mRNA [NM_007409]	NM_007409	NM_007409	11522	chr3	137952821	137952880	+	46435	51	283	A_52_P629895	FALSE	Mm.2409	ENSMUST00000004232		ref|NM_007409|ens|ENSMUST00000004232|ens|ENSMUST00000159159|gb|AK146094	chr3:137952821-137952880	mm|3qG3	GO:0001523(retinoid metabolic process)|GO:0004022(alcohol dehydrogenase (NAD) activity)|GO:0004745(retinol dehydrogenase activity)|GO:0005622(intracellular)|GO:0005737(cytoplasm)|GO:0005739(mitochondrion)|GO:0005829(cytosol)|GO:0006068(ethanol catabolic process)|GO:0006069(ethanol oxidation)|GO:0008144(drug binding)|GO:0008270(zinc ion binding)|GO:0016491(oxidoreductase activity)|GO:0032526(respo…	GTTTCCGTTGGACCCGTTAATTACCCATGTTTTACCTTTCGAGAAAATAAATGAAGCATT	124	ADH1A	0
A_55_P2112882	Adh6a	alcohol dehydrogenase 6A (class V)	Mus musculus alcohol dehydrogenase 6A (class V) (Adh6a), mRNA [NM_026945]	NM_026945	NM_026945	69117	chr3	137994039	137994098	+	5468	176	217	A_55_P2112882	FALSE	Mm.46265	ENSMUST00000106247		ref|NM_026945|ens|ENSMUST00000106247|gb|AK007397|riken|1810009C16	chr3:137994039-137994098	mm|3qG3	GO:0005575(cellular_component)	AGTGCAGCTGTTCTCCTGAAACGAGGACTTCTAGACCATACTGATAATAAAATAAGTTGG	130	ADH6	0
A_52_P116264	Adhfe1	alcohol dehydrogenase, iron containing, 1	Mus musculus alcohol dehydrogenase, iron containing, 1 (Adhfe1), transcript variant 1, mRNA [NM_175236]	NM_175236	NM_175236	76187	chr1	9553603	9553662	+	34547	87	116	A_52_P116264	FALSE	Mm.28514	ENSMUST00000027044		ref|NM_175236|ref|NR_027664|ens|ENSMUST00000027044|ens|ENSMUST00000190654	chr1:009553603-009553662	mm|1qA2	GO:0005739(mitochondrion)|GO:0015993(molecular hydrogen transport)|GO:0016491(oxidoreductase activity)|GO:0046872(metal ion binding)|GO:0047988(hydroxyacid-oxoacid transhydrogenase activity)|GO:0055114(oxidation-reduction process)	TACCCAATTTCAGGTTTAGTGAAGACATATAAAGCCAAGGAATATAATGTGGATCACCCT	137872	ADHFE1	0
A_55_P2042500	Adig	adipogenin	Mus musculus adipogenin (Adig), mRNA [NM_145635]	NM_145635	NM_145635	246747	chr2	158333875	158333934	+	30270	100	142	A_55_P2042500	FALSE	Mm.28800	ENSMUST00000059889		ref|NM_145635|ens|ENSMUST00000059889|gb|AY092026|gb|BC054059	chr2:158333875-158333934	mm|2qH1	GO:0003674(molecular_function)|GO:0005634(nucleus)|GO:0005737(cytoplasm)|GO:0016020(membrane)|GO:0016021(integral to membrane)|GO:0045444(fat cell differentiation)|GO:0045600(positive regulation of fat cell differentiation)	ACAGGGTGTGTTGGATACCTATTAAAGAAATGGGGGTGCTCTTGTGCCCCTACAGAGCTT	149685	ADIG	0
A_51_P458451	Adipoq	adiponectin, C1Q and collagen domain containing	Mus musculus adiponectin, C1Q and collagen domain containing (Adipoq), mRNA [NM_009605]	NM_009605	NM_009605	11450	chr16	23157576	23157635	+	37249	79	287	A_51_P458451	FALSE	Mm.3969	ENSMUST00000023593		ref|NM_009605|ens|ENSMUST00000023593|gb|AY749429|gb|AY754346	chr16:023157576-023157635	mm|16qB1	GO:0001934(positive regulation of protein phosphorylation)|GO:0005102(receptor binding)|GO:0005179(hormone activity)|GO:0005515(protein binding)|GO:0005576(extracellular region)|GO:0005581(collagen)|GO:0005615(extracellular space)|GO:0005783(endoplasmic reticulum)|GO:0006006(glucose metabolic process)|GO:0006635(fatty acid beta-oxidation)|GO:0009749(response to glucose stimulus)|GO:0009967(positi…	TGTATGGGGATGGGGACCACAATGGACTCTATGCAGATAACGTCAACGACTCTACATTTA	9370	ADIPOQ	0
A_51_P265571	Adm	adrenomedullin	Mus musculus adrenomedullin (Adm), mRNA [NM_009627]	NM_009627	NM_009627	11535	chr7	117773088	117773147	+	43847	59	211	A_51_P265571	FALSE	Mm.1408	ENSMUST00000033054		ref|NM_009627|ens|ENSMUST00000033054|ens|ENSMUST00000186620|gb|AK144181	chr7:117773088-117773147	mm|7qF1	GO:0001570(vasculogenesis)|GO:0001843(neural tube closure)|GO:0002026(regulation of the force of heart contraction)|GO:0002031(G-protein coupled receptor internalization)|GO:0005179(hormone activity)|GO:0005576(extracellular region)|GO:0005615(extracellular space)|GO:0005737(cytoplasm)|GO:0005829(cytosol)|GO:0006171(cAMP biosynthetic process)|GO:0007204(elevation of cytosolic calcium ion concentr…	TAAGGGCATTTTAAAGTGATTATATTGTCACCTTCCCCTATTTTAAGACGTGAATGTCTC	133	ADM	0
A_66_P122837	Ado	2-aminoethanethiol (cysteamine) dioxygenase	Mus musculus 2-aminoethanethiol (cysteamine) dioxygenase (Ado), mRNA [NM_001005419]	NM_001005419	NM_001005419	211488	chr10	67011203	67011144	-	6518	173	85	A_66_P122837	FALSE	Mm.297250	ENSMUST00000075686		ref|NM_001005419|ens|ENSMUST00000075686|gb|AK155334|gb|BC057106	chr10:067011203-067011144	mm|10qB5.1	GO:0005515(protein binding)|GO:0005739(mitochondrion)|GO:0016491(oxidoreductase activity)|GO:0046872(metal ion binding)|GO:0047800(cysteamine dioxygenase activity)|GO:0051213(dioxygenase activity)|GO:0055114(oxidation-reduction process)	GGTATGCTCAAGGTGCTGTACGGCACGGTCCGCATCAGCTGCATGGACAAGCTGGACACG	84890	ADO	0
A_52_P24951	Ado	2-aminoethanethiol (cysteamine) dioxygenase	Mus musculus 2-aminoethanethiol (cysteamine) dioxygenase (Ado), mRNA [NM_001005419]	NM_001005419	NM_001005419	211488	chr10	67008279	67008220	-	21519	127	259	A_52_P24951	FALSE	Mm.297250	ENSMUST00000075686		ref|NM_001005419|ens|ENSMUST00000075686|gb|BC057106|gb|BC058407	chr10:067008279-067008220	mm|10qB5.1	GO:0005515(protein binding)|GO:0005739(mitochondrion)|GO:0016491(oxidoreductase activity)|GO:0046872(metal ion binding)|GO:0047800(cysteamine dioxygenase activity)|GO:0051213(dioxygenase activity)|GO:0055114(oxidation-reduction process)	AAACCCTAAGGTGCTTTTCAAAAGAGTAACGAAATTGTTCTGAGCTAAAACAGCAATACT	84890	ADO	0
A_55_P2101776	Adora1	adenosine A1 receptor	Mus musculus adenosine A1 receptor (Adora1), transcript variant 2, mRNA [NM_001008533]	NM_001008533	NM_001008533	11539	chr1	136095892	136095833	-	44677	56	192	A_55_P2101776	FALSE	Mm.298908			ref|NM_001008533|ref|NM_001282945|ref|NM_001039510|ref|NM_001291930	chr1:136095892-136095833	mm|1qE4	GO:0000186(activation of MAPKK activity)|GO:0001609(G-protein coupled adenosine receptor activity)|GO:0001659(temperature homeostasis)|GO:0001664(G-protein coupled receptor binding)|GO:0001666(response to hypoxia)|GO:0001883(purine nucleoside binding)|GO:0001973(adenosine receptor signaling pathway)|GO:0002087(regulation of respiratory gaseous exchange by neurological system process)|GO:0002674(n…	TAGAAGGAGAGACCTGACATGTTGTCCTTAGACTTACACATGCACGTGTGCATGTGAACA	134	ADORA1	0
A_55_P2109382	Adora2a	adenosine A2a receptor	Mus musculus adenosine A2a receptor (Adora2a), mRNA [NM_009630]	NM_009630	NM_009630	11540	chr10	74797461	74797520	+	62780	1	66	A_55_P2109382	FALSE	Mm.333734	ENSMUST00000105420		ref|NM_009630|ens|ENSMUST00000105420|ref|XM_006513096|ref|XM_006513092	chr10:074797461-074797520	mm|10qC1	GO:0001609(G-protein coupled adenosine receptor activity)|GO:0001963(synaptic transmission, dopaminergic)|GO:0001973(adenosine receptor signaling pathway)|GO:0001975(response to amphetamine)|GO:0004871(signal transducer activity)|GO:0004930(G-protein coupled receptor activity)|GO:0005882(intermediate filament)|GO:0005886(plasma membrane)|GO:0005887(integral to plasma membrane)|GO:0006355(regulati…	GCTTGTTTGTTTGTTTGTGTTTTATTTTCCCCCTGAGATAAAATAAAATGAGCCACACTG	135	ADORA2A	0
A_55_P1972605	Adora3	adenosine A3 receptor	Mus musculus adenosine A3 receptor (Adora3), mRNA [NM_009631]	NM_009631	NM_009631	11542	chr3	105711212	105711271	+	43189	61	215	A_55_P1972605	FALSE	Mm.235024	ENSMUST00000164730		ref|NM_009631|ref|NM_001174169|ens|ENSMUST00000164730|ens|ENSMUST00000000574	chr3:105711212-105711271	mm|3qF2.2	GO:0001609(G-protein coupled adenosine receptor activity)|GO:0001973(adenosine receptor signaling pathway)|GO:0002553(histamine secretion by mast cell)|GO:0002687(positive regulation of leukocyte migration)|GO:0005886(plasma membrane)|GO:0005887(integral to plasma membrane)|GO:0014068(positive regulation of phosphatidylinositol 3-kinase cascade)|GO:0043306(positive regulation of mast cell degranu…	TTAAAAAGAGGGCTAAATCCACCTGTGTGGGTGCATTTGAGCAAATAAAAGATGATGCCC	140	ADORA3	0
A_51_P233855	Adprhl1	ADP-ribosylhydrolase like 1	Mus musculus ADP-ribosylhydrolase like 1 (Adprhl1), mRNA [NM_172750]	NM_172750	NM_172750	234072	chr8	13235855	13235796	-	60996	7	25	A_51_P233855	FALSE	Mm.132785	ENSMUST00000033825		ref|NM_172750|ens|ENSMUST00000033825|ref|XM_011242049|gb|AK081786	chr8:013235855-013235796	mm|8qA1.1	GO:0000287(magnesium ion binding)|GO:0003674(molecular_function)|GO:0003875(ADP-ribosylarginine hydrolase activity)|GO:0005575(cellular_component)|GO:0008150(biological_process)|GO:0016787(hydrolase activity)|GO:0051725(protein de-ADP-ribosylation)	CCGCCTGTCCACAGAAGAAAAGTAAAGTGTTTCTGACATTTCCCCTCCCAGAGGGCAGTG	113622	ADPRHL1	0
A_55_P2021505	Adra2a	adrenergic receptor, alpha 2a	Mus musculus adrenergic receptor, alpha 2a (Adra2a), mRNA [NM_007417]	NM_007417	NM_007417	11551	chr19	54123363	54123422	+	24879	117	99	A_55_P2021505	FALSE	Mm.235195	ENSMUST00000036700		ref|NM_007417|ens|ENSMUST00000036700|gb|AK046802|gb|AK140461	chr19:054123363-054123422	mm|19qD2	GO:0001819(positive regulation of cytokine production)|GO:0002526(acute inflammatory response)|GO:0004935(adrenergic receptor activity)|GO:0004938(alpha2-adrenergic receptor activity)|GO:0005737(cytoplasm)|GO:0005886(plasma membrane)|GO:0005887(integral to plasma membrane)|GO:0006260(DNA replication)|GO:0007186(G-protein coupled receptor signaling pathway)|GO:0007194(negative regulation of adenyl…	CTGATTTCACGAGAGAAAAACTAAATGTCAGCACTTGTTGCTCGTGACGGTGGATTTTTT	150	ADRA2A	0
A_55_P1994027	Adra2b	adrenergic receptor, alpha 2b	Mus musculus adrenergic receptor, alpha 2b (Adra2b), mRNA [NM_009633]	NM_009633	NM_009633	11552	chr2	127192619	127192678	+	16898	141	317	A_55_P1994027	FALSE	Mm.347390	ENSMUST00000104934		ref|NM_009633|ens|ENSMUST00000104934|ens|ENSMUST00000071902|gb|BC055783	chr2:127192619-127192678	mm|2qF1	GO:0000165(MAPK cascade)|GO:0000187(activation of MAPK activity)|GO:0001525(angiogenesis)|GO:0003056(regulation of vascular smooth muscle contraction)|GO:0004935(adrenergic receptor activity)|GO:0004938(alpha2-adrenergic receptor activity)|GO:0005622(intracellular)|GO:0005887(integral to plasma membrane)|GO:0007186(G-protein coupled receptor signaling pathway)|GO:0007194(negative regulation of ad…	ATTTGGGGTGTGGCTGAGGGGTTGGTTTGGTTTTTTGTTTTTGTTTTTTGTTTGTTTGTT	151	ADRA2B	0
A_52_P322181	Adrb1	adrenergic receptor, beta 1	Mus musculus adrenergic receptor, beta 1 (Adrb1), mRNA [NM_007419]	NM_007419	NM_007419	11554	chr19	56799215	56799274	+	51528	35	266	A_52_P322181	FALSE	Mm.46797	ENSMUST00000038949		ref|NM_007419|ens|ENSMUST00000038949|gb|AK039569|tc|TC1599167	chr19:056799215-056799274	mm|19qD2	GO:0001996(positive regulation of heart rate by epinephrine-norepinephrine)|GO:0001997(positive regulation of the force of heart contraction by epinephrine-norepinephrine)|GO:0002024(diet induced thermogenesis)|GO:0002025(vasodilation by norepinephrine-epinephrine involved in regulation of systemic arterial blood pressure)|GO:0003061(positive regulation of the force of heart contraction by norepi…	GTTGGAAGGCCATTTTGCACAGTGTTAGGCATTGTAAAATTCATAGAAGTTGTTAACTTG	153	ADRB1	0
A_55_P2029558	Adrb2	adrenergic receptor, beta 2	Mus musculus adrenergic receptor, beta 2 (Adrb2), mRNA [NM_007420]	NM_007420	NM_007420	11555	chr18	62338415	62338356	-	45952	52	266	A_55_P2029558	FALSE	Mm.5598	ENSMUST00000053640		ref|NM_007420|ens|ENSMUST00000053640|gb|AK080241|gb|AK080276	chr18:062338415-062338356	mm|18qE1	GO:0001965(G-protein alpha-subunit binding)|GO:0001993(regulation of systemic arterial blood pressure by norepinephrine-epinephrine)|GO:0002024(diet induced thermogenesis)|GO:0002025(vasodilation by norepinephrine-epinephrine involved in regulation of systemic arterial blood pressure)|GO:0002028(regulation of sodium ion transport)|GO:0002032(desensitization of G-protein coupled receptor protein s…	ATTTCAGGATTGCCTTTCAAGAGCTTCTGTGCCTTCGCAGGTCTTCTTCGAAAACCTATG	154	ADRB2	0
A_55_P1992849	Adrb3	adrenergic receptor, beta 3	Mus musculus adrenergic receptor, beta 3 (Adrb3), mRNA [NM_013462]	NM_013462	NM_013462	11556	chr8	28336327	28336268	-	53933	28	48	A_55_P1992849	FALSE	Mm.278475	ENSMUST00000081438		ref|NM_013462|ens|ENSMUST00000081438|gb|AK136495|tc|TC1584849	chr8:028336327-028336268	mm|8qA2	GO:0002024(diet induced thermogenesis)|GO:0002025(vasodilation by norepinephrine-epinephrine involved in regulation of systemic arterial blood pressure)|GO:0004871(signal transducer activity)|GO:0004930(G-protein coupled receptor activity)|GO:0004935(adrenergic receptor activity)|GO:0004939(beta-adrenergic receptor activity)|GO:0005634(nucleus)|GO:0005886(plasma membrane)|GO:0005887(integral to p…	GGGTTCATAGGAAGAAGTCAAACTATTGGAATGGGTCCTTTTTCCACTTAAAATCAAATT	155	ADRB3	0
A_51_P108581	Adrbk2	adrenergic receptor kinase, beta 2	Mus musculus adrenergic receptor kinase, beta 2 (Adrbk2), transcript variant 1, mRNA [NM_177078]	NM_177078	NM_177078	320129	chr5	113339722	113339663	-	5294	176	238	A_51_P108581	FALSE	Mm.285619	ENSMUST00000065167		ref|NM_177078|ref|NM_001285806|ens|ENSMUST00000065167|gb|AK134672	chr5:113339722-113339663	mm|5qF	GO:0000166(nucleotide binding)|GO:0001934(positive regulation of protein phosphorylation)|GO:0002029(desensitization of G-protein coupled receptor protein signaling pathway)|GO:0004672(protein kinase activity)|GO:0004674(protein serine/threonine kinase activity)|GO:0004703(G-protein coupled receptor kinase activity)|GO:0005524(ATP binding)|GO:0005634(nucleus)|GO:0005829(cytosol)|GO:0005929(cilium…	AGATCTGGCTTCTTCTGGTAACAGAGATGGATGGACCTGTAACTAGGAGACAAGAGTTCT	157	GRK3	0
A_55_P2030030	Adssl1	adenylosuccinate synthetase like 1	Mus musculus adenylosuccinate synthetase like 1 (Adssl1), mRNA [NM_007421]	NM_007421	NM_007421	11565	chr12	113879491	113879550	+	18693	136	7	A_55_P2030030	FALSE	Mm.3440	ENSMUST00000180015		ref|NM_007421|ens|ENSMUST00000180015|ens|ENSMUST00000021726|gb|AK146907	chr12:113879491-113879550	mm|12qF1	GO:0000166(nucleotide binding)|GO:0003924(GTPase activity)|GO:0004019(adenylosuccinate synthase activity)|GO:0005515(protein binding)|GO:0005525(GTP binding)|GO:0005737(cytoplasm)|GO:0006163(purine nucleotide metabolic process)|GO:0006164(purine nucleotide biosynthetic process)|GO:0006167(AMP biosynthetic process)|GO:0006531(aspartate metabolic process)|GO:0009168(purine ribonucleoside monophosph…	TGTCACATGGTATGTGTTCAGTTGGAGCCATGTCATAATAAACATAGCCAGGGGTCACTG	122622	ADSSL1	0
A_55_P2035662	Aebp1	AE binding protein 1	Mus musculus AE binding protein 1 (Aebp1), transcript variant 1, mRNA [NM_001291857]	NM_001291857	NM_001291857	11568	chr11	5772031	5772090	+	23845	120	199	A_55_P2035662	FALSE	Mm.4665	ENSMUST00000102923		ref|NM_001291857|ref|NM_009636|ens|ENSMUST00000102923|ens|ENSMUST00000109829	chr11:005772031-005772090	mm|11qA1	GO:0000122(negative regulation of transcription from RNA polymerase II promoter)|GO:0000977(RNA polymerase II regulatory region sequence-specific DNA binding)|GO:0001227(RNA polymerase II transcription regulatory region sequence-specific DNA binding transcription factor activity involved in negative regulation of transcription)|GO:0003677(DNA binding)|GO:0003714(transcription corepressor activity…	CTTTGGGGAGGGGCAGGCAAGGAAGCCAACGTCACATCAATAAAACAAGCTCATGACACC	165	AEBP1	0
A_55_P2165544	Aebp2	AE binding protein 2	Mus musculus AE binding protein 2 (Aebp2), transcript variant 1, mRNA [NM_001005605]	NM_001005605	NM_001005605	11569	chr6	140603895	140603954	+	21168	128	305	A_55_P2165544	FALSE	Mm.86453			ref|NM_001005605|ref|NM_178803|ref|XM_006506906	chr6:140603895-140603954	mm|6qG2	GO:0000122(negative regulation of transcription from RNA polymerase II promoter)|GO:0000978(RNA polymerase II core promoter proximal region sequence-specific DNA binding)|GO:0001078(RNA polymerase II core promoter proximal region sequence-specific DNA binding transcription factor activity involved in negative regulation of transcription)|GO:0003676(nucleic acid binding)|GO:0003677(DNA binding)|GO…	GTGTTCCTCAAGGTTGACATTCTCTGCCTGAAGAAAATGTGTCTTTACAAATTTTACAAT	121536	AEBP2	0
A_55_P2145804	Aen	apoptosis enhancing nuclease	Mus musculus apoptosis enhancing nuclease (Aen), transcript variant 1, mRNA [NM_026531]	NM_026531	NM_026531	68048	chr7	86053207	86053266	+	48454	45	181	A_55_P2145804	FALSE	Mm.34109	ENSMUST00000107425		ref|NM_026531|ref|NM_001162939|ens|ENSMUST00000107425|ens|ENSMUST00000107423	chr4:014158391-014158332	mm|4qA1	GO:0003676(nucleic acid binding)|GO:0004518(nuclease activity)|GO:0004527(exonuclease activity)|GO:0005634(nucleus)|GO:0005654(nucleoplasm)|GO:0005730(nucleolus)|GO:0006915(apoptotic process)|GO:0006974(response to DNA damage stimulus)|GO:0010212(response to ionizing radiation)|GO:0016787(hydrolase activity)|GO:0031965(nuclear membrane)|GO:0042578(phosphoric ester hydrolase activity)|GO:0042771(D…	AAGTCAGCTTGCTCATAGTACCAGACCATCGGCATAGGAATAAAGTGCATCTGGAAAAGT	64782	AEN	0
A_55_P2141860	Aen	apoptosis enhancing nuclease	Mus musculus apoptosis enhancing nuclease (Aen), transcript variant 1, mRNA [NM_026531]	NM_026531	NM_026531	68048	chr7	86053197	86053256	+	50799	38	83	A_55_P2141860	FALSE	Mm.34109	ENSMUST00000107425		ref|NM_026531|ref|NM_001162939|ens|ENSMUST00000107425|ens|ENSMUST00000107421	chr4:014158401-014158342	mm|4qA1	GO:0003676(nucleic acid binding)|GO:0004518(nuclease activity)|GO:0004527(exonuclease activity)|GO:0005634(nucleus)|GO:0005654(nucleoplasm)|GO:0005730(nucleolus)|GO:0006915(apoptotic process)|GO:0006974(response to DNA damage stimulus)|GO:0010212(response to ionizing radiation)|GO:0016787(hydrolase activity)|GO:0031965(nuclear membrane)|GO:0042578(phosphoric ester hydrolase activity)|GO:0042771(D…	TTACTGGGAGAAGTCAGCTTGCTCATAGTACCAGACCATCGGCATAGGAATAAAGTGCAT	64782	AEN	0
A_55_P1978216	AF251705	cDNA sequence AF251705	Mus musculus cDNA sequence AF251705 (AF251705), mRNA [NM_134158]	NM_134158	NM_134158	140497	chr11	114858143	114858084	-	19880	132	257	A_55_P1978216	FALSE	Mm.2699	ENSMUST00000141188		ref|NM_134158|ens|ENSMUST00000141188|ens|ENSMUST00000092464|ref|XM_006532176	chr11:114858143-114858084	mm|11qE2	GO:0002376(immune system process)|GO:0005515(protein binding)|GO:0005886(plasma membrane)|GO:0016020(membrane)|GO:0016021(integral to membrane)|GO:0050715(positive regulation of cytokine secretion)	CCAGTAAATACATATTTCTTGAGAATGCTCTGAGACTTTTAGAAGATTCTCTGTGGTGTA	11314	CD300A	0
A_51_P486121	Aff3	AF4/FMR2 family, member 3	Mus musculus AF4/FMR2 family, member 3 (Aff3), mRNA [NM_001290814]	NM_001290814	NM_001290814	16764	chr1	38266438	38264857	-	9186	164	326	A_51_P486121	FALSE	Mm.336679	ENSMUST00000039827		ref|NM_001290814|ens|ENSMUST00000039827|ref|XM_011238446|ref|XM_011238443	unmapped		GO:0003677(DNA binding)|GO:0003690(double-stranded DNA binding)|GO:0003700(sequence-specific DNA binding transcription factor activity)|GO:0005634(nucleus)|GO:0005654(nucleoplasm)|GO:0005737(cytoplasm)|GO:0006351(transcription, DNA-dependent)|GO:0006355(regulation of transcription, DNA-dependent)|GO:0034612(response to tumor necrosis factor)|GO:0035116(embryonic hindlimb morphogenesis)	CTGCTGAAAAGACTTTGCCAAAATCCAAGAGGAAACGCAAGTGCGACAACGAAGATGACT	3899	AFF3	0
A_51_P510891	Afp	alpha fetoprotein	Mus musculus alpha fetoprotein (Afp), mRNA [NM_007423]	NM_007423	NM_007423	11576	chr5	90937781	90937840	+	2358	185	206	A_51_P510891	FALSE	Mm.358570	ENSMUST00000042755		ref|NM_007423|ens|ENSMUST00000042755|gb|AK168426|gb|AK146513	chr5:090937781-090937840	mm|5qE1	GO:0001542(ovulation from ovarian follicle)|GO:0004566(beta-glucuronidase activity)|GO:0005576(extracellular region)|GO:0005615(extracellular space)|GO:0005737(cytoplasm)|GO:0006810(transport)|GO:0019953(sexual reproduction)|GO:0042448(progesterone metabolic process)|GO:0046872(metal ion binding)|GO:0060395(SMAD protein signal transduction)	GTGAGCCTTTTGGCTTAACTGTAACTGCTAGTACTTTAACCACATGGTGAAGATGTCCAT	174	AFP	0
A_52_P330359	Agbl2	ATP/GTP binding protein-like 2	Mus musculus ATP/GTP binding protein-like 2 (Agbl2), mRNA [NM_178755]	NM_178755	NM_178755	271813	chr2	90656122	90656181	+	11448	158	65	A_52_P330359	FALSE	Mm.61146	ENSMUST00000037219		ref|NM_178755|ens|ENSMUST00000037219|ens|ENSMUST00000111481|ref|XM_006499631	chr2:090656122-090656181	mm|2qE1	GO:0004180(carboxypeptidase activity)|GO:0004181(metallocarboxypeptidase activity)|GO:0005737(cytoplasm)|GO:0005814(centriole)|GO:0005829(cytosol)|GO:0005856(cytoskeleton)|GO:0006508(proteolysis)|GO:0008233(peptidase activity)|GO:0008237(metallopeptidase activity)|GO:0008270(zinc ion binding)|GO:0016787(hydrolase activity)|GO:0035610(protein side chain deglutamylation)|GO:0036064(cilium basal bod…	AGTTAGATGCAAATCAGTTTTAAAAGATCGAGCTGTTTTAAGTGTGTTTTGGGAATGTGC	79841	AGBL2	0
A_52_P192084	Agbl4	ATP/GTP binding protein-like 4	Mus musculus ATP/GTP binding protein-like 4 (Agbl4), transcript variant 1, mRNA [NM_030231]	NM_030231	NM_030231	78933	chr4	111239318	111287607	+	36716	81	41	A_52_P192084	FALSE	Mm.435620	ENSMUST00000154123		ref|NM_030231|ref|NM_001284190|ref|NM_001048189|ens|ENSMUST00000154123	unmapped		GO:0004180(carboxypeptidase activity)|GO:0004181(metallocarboxypeptidase activity)|GO:0005515(protein binding)|GO:0005737(cytoplasm)|GO:0005794(Golgi apparatus)|GO:0005814(centriole)|GO:0005829(cytosol)|GO:0005856(cytoskeleton)|GO:0006508(proteolysis)|GO:0008233(peptidase activity)|GO:0008237(metallopeptidase activity)|GO:0008270(zinc ion binding)|GO:0015631(tubulin binding)|GO:0016787(hydrolase …	AGATGTACAATGACCCAAAAACAAGCCTGGAGTTCTATATTGACATCCACGCTCACTCCA	84871	AGBL4	0
A_55_P2013569	Agbl4	ATP/GTP binding protein-like 4	Mus musculus ATP/GTP binding protein-like 4 (Agbl4), transcript variant 3, mRNA [NM_001284190]	NM_001284190	NM_001284190	78933	chr4	110252720	110252779	+	11849	156	248	A_55_P2013569	FALSE	Mm.435620	ENSMUST00000097920		ref|NM_001284190|ref|NM_030231|ref|NM_001048189|ens|ENSMUST00000097920	chr4:110252720-110252779	mm|4qC7	GO:0004180(carboxypeptidase activity)|GO:0004181(metallocarboxypeptidase activity)|GO:0005515(protein binding)|GO:0005737(cytoplasm)|GO:0005794(Golgi apparatus)|GO:0005814(centriole)|GO:0005829(cytosol)|GO:0005856(cytoskeleton)|GO:0006508(proteolysis)|GO:0008233(peptidase activity)|GO:0008237(metallopeptidase activity)|GO:0008270(zinc ion binding)|GO:0015631(tubulin binding)|GO:0016787(hydrolase …	CTGTAATCCACGCTTCCGAGTCTGGTTCAACTTTACTGTTGAAAATGTGAAAGAATTGCA	84871	AGBL4	0
A_55_P2427685	Agl	amylo-1,6-glucosidase, 4-alpha-glucanotransferase	Mus musculus amylo-1,6-glucosidase, 4-alpha-glucanotransferase (Agl), mRNA [NM_001081326]	NM_001081326	NM_001081326	77559	chr3	116446028	116445969	-	56157	21	192	A_55_P2427685	FALSE	Mm.237099	ENSMUST00000162792		ref|NM_001081326|ens|ENSMUST00000162792|ens|ENSMUST00000040603|ref|XM_006502287	chr3:116446028-116445969	mm|3qG1	GO:0004133(glycogen debranching enzyme activity)|GO:0004134(4-alpha-glucanotransferase activity)|GO:0004135(amylo-alpha-1,6-glucosidase activity)|GO:0005515(protein binding)|GO:0005634(nucleus)|GO:0005654(nucleoplasm)|GO:0005737(cytoplasm)|GO:0005977(glycogen metabolic process)|GO:0005980(glycogen catabolic process)|GO:0007584(response to nutrient)|GO:0009725(response to hormone stimulus)|GO:0016…	GCTCTGACTCCTGAGCAAGTGTTCATGTCTGTGTGTCAAAATAAAAGTTTTTTCTAAAGG	178		0
A_51_P510764	Agmo	alkylglycerol monooxygenase	Mus musculus alkylglycerol monooxygenase (Agmo), mRNA [NM_178767]	NM_178767	NM_178767	319660	chr12	38308342	38308401	+	22611	124	43	A_51_P510764	FALSE	Mm.485540	ENSMUST00000049874		ref|NM_178767|ens|ENSMUST00000049874|gb|AK040702|gb|BY763315	chr12:038308342-038308401	mm|12qA3	GO:0005506(iron ion binding)|GO:0005783(endoplasmic reticulum)|GO:0006633(fatty acid biosynthetic process)|GO:0006643(membrane lipid metabolic process)|GO:0016020(membrane)|GO:0016021(integral to membrane)|GO:0016491(oxidoreductase activity)|GO:0046485(ether lipid metabolic process)|GO:0050479(glyceryl-ether monooxygenase activity)|GO:0055114(oxidation-reduction process)	TTCATTTCTCTCTGTGGCAATGAATAAGGAAAGGAAACAGGGGCATAAATTTGTTTAAAG	392636	AGMO	0
A_55_P2002133	Ago2	argonaute RISC catalytic subunit 2	Mus musculus argonaute RISC catalytic subunit 2 (Ago2), mRNA [NM_153178]	NM_153178	NM_153178	239528	chr15	72935764	72935705	-	24059	119	100	A_55_P2002133	FALSE	Mm.490340	ENSMUST00000044113		ref|NM_153178|ens|ENSMUST00000044113|gb|AK142854|tc|TC1598111	chr15:072935764-072935705	mm|15qD3	GO:0000340(RNA 7-methylguanosine cap binding)|GO:0000932(cytoplasmic mRNA processing body)|GO:0000993(RNA polymerase II core binding)|GO:0001047(core promoter binding)|GO:0003676(nucleic acid binding)|GO:0003723(RNA binding)|GO:0003725(double-stranded RNA binding)|GO:0003727(single-stranded RNA binding)|GO:0003729(mRNA binding)|GO:0004518(nuclease activity)|GO:0004519(endonuclease activity)|GO:00…	ACGAGCCTTCTCTTGTGTGCTGCTCTGTGCTCTGTGGGTTTTTTCTACCCCTGCTGATGG	27161	AGO2	0
A_55_P2113071	Ago4	argonaute RISC catalytic subunit 4	Mus musculus argonaute RISC catalytic subunit 4 (Ago4), mRNA [NM_153177]	NM_153177	NM_153177	76850	chr4	126169596	126169537	-	2945	184	15	A_55_P2113071	FALSE	Mm.86705	ENSMUST00000084289		ref|NM_153177|ens|ENSMUST00000084289|ref|XM_006503483|ref|XM_011240651	chr4:126169596-126169537	mm|4qD2.2	GO:0000932(cytoplasmic mRNA processing body)|GO:0003676(nucleic acid binding)|GO:0003723(RNA binding)|GO:0003725(double-stranded RNA binding)|GO:0003727(single-stranded RNA binding)|GO:0005737(cytoplasm)|GO:0006402(mRNA catabolic process)|GO:0006417(regulation of translation)|GO:0010501(RNA secondary structure unwinding)|GO:0016020(membrane)|GO:0016442(RNA-induced silencing complex)|GO:0030529(ri…	GCCCTTTCTCCTGACGTCGTTTTCTAGATGAGATTTCAGTATGATTTTATCAACTATTTC	192670	AGO4	0
A_55_P1970810	Agpat2	1-acylglycerol-3-phosphate O-acyltransferase 2 (lysophosphatidic acid acyltransferase, beta)	Mus musculus 1-acylglycerol-3-phosphate O-acyltransferase 2 (lysophosphatidic acid acyltransferase, beta) (Agpat2), mRNA [NM_026212]	NM_026212	NM_026212	67512	chr2	26448669	26448610	-	51457	36	79	A_55_P1970810	FALSE	Mm.24244	ENSMUST00000028286		ref|NM_026212|ens|ENSMUST00000028286|ens|ENSMUST00000131940|gb|AK010891	chr2:026448669-026448610	mm|2qA3	GO:0001819(positive regulation of cytokine production)|GO:0003841(1-acylglycerol-3-phosphate O-acyltransferase activity)|GO:0005783(endoplasmic reticulum)|GO:0006629(lipid metabolic process)|GO:0006654(phosphatidic acid biosynthetic process)|GO:0008152(metabolic process)|GO:0008654(phospholipid biosynthetic process)|GO:0016020(membrane)|GO:0016021(integral to membrane)|GO:0016740(transferase acti…	GACGGCCTCAGTCACAAATCACTGCTGTGTTTGGTTCTTTTTCTATAAATGAACTCTCAG	10555	AGPAT2	0
A_55_P2125947	Agpat2	1-acylglycerol-3-phosphate O-acyltransferase 2 (lysophosphatidic acid acyltransferase, beta)	Mus musculus 1-acylglycerol-3-phosphate O-acyltransferase 2 (lysophosphatidic acid acyltransferase, beta) (Agpat2), mRNA [NM_026212]	NM_026212	NM_026212	67512	chr2	26449166	26449107	-	1179	189	267	A_55_P2125947	FALSE	Mm.24244	ENSMUST00000028286		ref|NM_026212|ens|ENSMUST00000028286|ens|ENSMUST00000131940|gb|AY072769	chr2:026449166-026449107	mm|2qA3	GO:0001819(positive regulation of cytokine production)|GO:0003841(1-acylglycerol-3-phosphate O-acyltransferase activity)|GO:0005783(endoplasmic reticulum)|GO:0006629(lipid metabolic process)|GO:0006654(phosphatidic acid biosynthetic process)|GO:0008152(metabolic process)|GO:0008654(phospholipid biosynthetic process)|GO:0016020(membrane)|GO:0016021(integral to membrane)|GO:0016740(transferase acti…	TCTCAGATTCCCCAAGAGAACTCTGCCATTAAGGAGCCTGGGGTCTTGCCAGCCCAGTAG	10555	AGPAT2	0
A_55_P1968433	Agpat9	1-acylglycerol-3-phosphate O-acyltransferase 9	Mus musculus 1-acylglycerol-3-phosphate O-acyltransferase 9 (Agpat9), mRNA [NM_172715]	NM_172715	NM_172715	231510	chr5	101328054	101328113	+	47289	48	216	A_55_P1968433	FALSE	Mm.271911	ENSMUST00000112887		ref|NM_172715|ens|ENSMUST00000112887|ens|ENSMUST00000031255|ens|ENSMUST00000092990	chr5:101328054-101328113	mm|5qE4	GO:0003841(1-acylglycerol-3-phosphate O-acyltransferase activity)|GO:0004366(glycerol-3-phosphate O-acyltransferase activity)|GO:0005783(endoplasmic reticulum)|GO:0005789(endoplasmic reticulum membrane)|GO:0006629(lipid metabolic process)|GO:0008152(metabolic process)|GO:0008654(phospholipid biosynthetic process)|GO:0016020(membrane)|GO:0016021(integral to membrane)|GO:0016740(transferase activit…	CCGGAGCAACCCTGTGTAGAAAGTGAACTGTCTTACTGACTATGAATAAATTTTATATTT	84803	GPAT3	0
A_51_P209122	Agr2	anterior gradient 2	Mus musculus anterior gradient 2 (Agr2), mRNA [NM_011783]	NM_011783	NM_011783	23795	chr12	36730506	36730565	+	43287	61	19	A_51_P209122	FALSE	Mm.7244	ENSMUST00000020898		ref|NM_011783|ens|ENSMUST00000020898|gb|AK008296|gb|AK007677	chr12:036730506-036730565	mm|12qA3	GO:0002162(dystroglycan binding)|GO:0005154(epidermal growth factor receptor binding)|GO:0005576(extracellular region)|GO:0005615(extracellular space)|GO:0005739(mitochondrion)|GO:0005783(endoplasmic reticulum)|GO:0010628(positive regulation of gene expression)|GO:0010811(positive regulation of cell-substrate adhesion)|GO:0042803(protein homodimerization activity)|GO:0045742(positive regulation o…	GTCAGGAGACCAGAAGGCAGAAGCACTGTGGACTTGCAGATTACAGTACAGTTTAATGTT	10551	AGR2	0
A_55_P2228293	Agtpbp1	ATP/GTP binding protein 1	Mus musculus ATP/GTP binding protein 1 (Agtpbp1), transcript variant 4, mRNA [NM_001284219]	NM_001284219	NM_001284219	67269	chr13	59567454	59567395	-	31125	98	71	A_55_P2228293	FALSE	Mm.153008	ENSMUST00000170555		ref|NM_001284219|ref|NM_023328|ens|ENSMUST00000170555|ens|ENSMUST00000169745	chr13:059567454-059567395	mm|13qB2	GO:0001754(eye photoreceptor cell differentiation)|GO:0004180(carboxypeptidase activity)|GO:0004181(metallocarboxypeptidase activity)|GO:0005515(protein binding)|GO:0005634(nucleus)|GO:0005737(cytoplasm)|GO:0005739(mitochondrion)|GO:0005829(cytosol)|GO:0006508(proteolysis)|GO:0007005(mitochondrion organization)|GO:0007628(adult walking behavior)|GO:0008233(peptidase activity)|GO:0008237(metallope…	TTCTCGAAAAAAGAATGTATTCATGTACGGCTGCAGCATCAAAGAGACGGTGTGGCACAC	23287	AGTPBP1	0
A_52_P645862	Agtr1a	angiotensin II receptor, type 1a	Mus musculus angiotensin II receptor, type 1a (Agtr1a), mRNA [NM_177322]	NM_177322	NM_177322	11607	chr13	30474638	30474697	+	39482	72	86	A_52_P645862	FALSE	Mm.35062	ENSMUST00000066412		ref|NM_177322|ens|ENSMUST00000066412|ref|XM_006516534|ref|XM_011244264	chr13:030474638-030474697	mm|13qA3.2	GO:0001568(blood vessel development)|GO:0001596(angiotensin type I receptor activity)|GO:0001822(kidney development)|GO:0001921(positive regulation of receptor recycling)|GO:0001965(G-protein alpha-subunit binding)|GO:0001991(regulation of systemic arterial blood pressure by circulatory renin-angiotensin)|GO:0002001(renin secretion into blood stream)|GO:0002018(renin-angiotensin regulation of ald…	TCCTCCACATATATGTACATATGTATCTCTAAGCTGTCATTTGATGAAGTTTTGGCAATG	185	AGTR1	0
A_55_P1975170	Agtr1b	angiotensin II receptor, type 1b	Mus musculus angiotensin II receptor, type 1b (Agtr1b), mRNA [NM_175086]	NM_175086	NM_175086	11608	chr3	20213598	20213539	-	16153	143	168	A_55_P1975170	FALSE	Mm.134863	ENSMUST00000068316		ref|NM_175086|ens|ENSMUST00000068316|gb|AK087228|tc|TC1593315	chr3:020213598-020213539	mm|3qA2	GO:0001568(blood vessel development)|GO:0001596(angiotensin type I receptor activity)|GO:0001822(kidney development)|GO:0001991(regulation of systemic arterial blood pressure by circulatory renin-angiotensin)|GO:0002035(brain renin-angiotensin system)|GO:0004871(signal transducer activity)|GO:0004930(G-protein coupled receptor activity)|GO:0004945(angiotensin type II receptor activity)|GO:0005829…	CCAGGTAACTGTGTCTTCATAGTTGGACCAGTTTTATTTCATATCTAAGAAATGTAGTCT	185	AGTR1	0
A_51_P437978	Agtr2	angiotensin II receptor, type 2	Mus musculus angiotensin II receptor, type 2 (Agtr2), mRNA [NM_007429]	NM_007429	NM_007429	11609	chrX	21065564	21065623	+	49583	41	220	A_51_P437978	FALSE	Mm.2679	ENSMUST00000089188		ref|NM_007429|ens|ENSMUST00000089188|ref|XM_006527555|gb|U04828	chrX:021065564-021065623	mm|XqA2	GO:0001991(regulation of systemic arterial blood pressure by circulatory renin-angiotensin)|GO:0002018(renin-angiotensin regulation of aldosterone production)|GO:0002033(vasodilation by angiotensin involved in regulation of systemic arterial blood pressure)|GO:0002035(brain renin-angiotensin system)|GO:0004871(signal transducer activity)|GO:0004930(G-protein coupled receptor activity)|GO:0004945(…	CTTAACACGAGTACATCTCTTACATTAGAGGAATATAATACCTGAAGCTGTGTTACCTAA	186	AGTR2	0
A_52_P552550	Agtrap	angiotensin II, type I receptor-associated protein	Mus musculus angiotensin II, type I receptor-associated protein (Agtrap), transcript variant 1, mRNA [NM_009642]	NM_009642	NM_009642	11610	chr4	147454490	147454431	-	55607	23	307	A_52_P552550	FALSE	Mm.46247	ENSMUST00000030865		ref|NM_009642|ref|NM_001301281|ens|ENSMUST00000030865|ref|XM_006544748	chr4:147454490-147454431	mm|4qE2	GO:0004945(angiotensin type II receptor activity)|GO:0005515(protein binding)|GO:0005654(nucleoplasm)|GO:0005737(cytoplasm)|GO:0005783(endoplasmic reticulum)|GO:0005794(Golgi apparatus)|GO:0005886(plasma membrane)|GO:0005938(cell cortex)|GO:0008217(regulation of blood pressure)|GO:0016020(membrane)|GO:0016021(integral to membrane)|GO:0031410(cytoplasmic vesicle)|GO:0038166(angiotensin-mediated si…	CTGAGTCATGTGCCCTTGGAGGTCAAGAGCCTCTAGCTTCTCAGTGGAGAAGAGCCCAGT	57085	AGTRAP	0
A_51_P118763	Ahctf1	AT hook containing transcription factor 1	Mus musculus AT hook containing transcription factor 1 (Ahctf1), mRNA [NM_026375]	NM_026375	NM_026375	226747	chr1	181676542	181676483	-	722	190	198	A_51_P118763	FALSE	Mm.128165	ENSMUST00000151734		ref|NM_026375|ens|ENSMUST00000151734|ens|ENSMUST00000027768|ref|XM_006496800	chr1:181676542-181676483	mm|1qH4	GO:0000775(chromosome, centromeric region)|GO:0000776(kinetochore)|GO:0000777(condensed chromosome kinetochore)|GO:0000785(chromatin)|GO:0000910(cytokinesis)|GO:0003677(DNA binding)|GO:0003700(sequence-specific DNA binding transcription factor activity)|GO:0005634(nucleus)|GO:0005643(nuclear pore)|GO:0005654(nucleoplasm)|GO:0005694(chromosome)|GO:0005737(cytoplasm)|GO:0006351(transcription, DNA-d…	AGCAGGAAAAACTCTTGGAAGGGGCAGAAAGAAGCCATCTTCTTTTCCAAAGCAAATTTT	25909	AHCTF1	0
A_55_P2266977	Ahcyl2	S-adenosylhomocysteine hydrolase-like 2	Mus musculus S-adenosylhomocysteine hydrolase-like 2 (Ahcyl2), transcript variant 3, mRNA [NM_001171001]	NM_001171001	NM_001171001	74340	chr6	29861897	29861956	+	37411	78	292	A_55_P2266977	FALSE	Mm.210899	ENSMUST00000115238		ref|NM_001171001|ref|NM_021414|ref|NM_001171000|ens|ENSMUST00000115238	chr6:029861897-029861956	mm|6qA3.3	GO:0004013(adenosylhomocysteinase activity)|GO:0005575(cellular_component)|GO:0005829(cytosol)|GO:0006730(one-carbon metabolic process)|GO:0016787(hydrolase activity)|GO:0033353(S-adenosylmethionine cycle)	CACACACTCCTGCAAAGCTTTTTCTGCTGCTTGGCTTTTCTCTGAAAAGATCTGAAATTG	23382	AHCYL2	0
A_52_P162509	Ahcyl2	S-adenosylhomocysteine hydrolase-like 2	Mus musculus S-adenosylhomocysteine hydrolase-like 2 (Ahcyl2), transcript variant 1, mRNA [NM_021414]	NM_021414	NM_021414	74340	chr6	29856683	29856742	+	7315	170	132	A_52_P162509	FALSE	Mm.210899	ENSMUST00000141304		ref|NM_021414|ref|NM_001171001|ref|NM_001171000|ens|ENSMUST00000141304	chr6:029856683-029856742	mm|6qA3.3	GO:0004013(adenosylhomocysteinase activity)|GO:0005575(cellular_component)|GO:0005829(cytosol)|GO:0006730(one-carbon metabolic process)|GO:0016787(hydrolase activity)|GO:0033353(S-adenosylmethionine cycle)	TCTCGCCTTGATAGAACTTTACAATGCTCCTGAGGGTCGCTATAAGCAAGATGTGTACCT	23382	AHCYL2	0
A_55_P2162782	Ahnak	AHNAK nucleoprotein (desmoyokin)	Mus musculus AHNAK nucleoprotein (desmoyokin) (Ahnak), transcript variant 1, mRNA [NM_009643]	NM_009643	NM_009643	66395	chr19	9090559	9090618	+	33385	91	143	A_55_P2162782	FALSE	Mm.203866	ENSMUST00000092956		ref|NM_009643|ens|ENSMUST00000092956|ref|XM_006527253|ref|XM_006527254	chr19:009090559-009090618	mm|19qA	GO:0005634(nucleus)|GO:0005737(cytoplasm)|GO:0005765(lysosomal membrane)|GO:0005829(cytosol)|GO:0005886(plasma membrane)|GO:0005911(cell-cell junction)|GO:0005925(focal adhesion)|GO:0015629(actin cytoskeleton)|GO:0016020(membrane)|GO:0030315(T-tubule)|GO:0031982(vesicle)|GO:0042383(sarcolemma)|GO:0043034(costamere)|GO:0043484(regulation of RNA splicing)|GO:0044291(cell-cell contact zone)|GO:00445…	TCACCAGGGATTAATGTGGAAGCTCCTGATATTCATATGAAGGCTCCCAAGTTCAAGGTG	79026	AHNAK	0
A_52_P263095	Ahnak	AHNAK nucleoprotein (desmoyokin)	Mus musculus AHNAK nucleoprotein (desmoyokin) (Ahnak), transcript variant 1, mRNA [NM_009643]	NM_009643	NM_009643	66395	chr19	9093549	9093608	+	4919	178	3	A_52_P263095	FALSE	Mm.203866	ENSMUST00000092956		ref|NM_009643|ens|ENSMUST00000092956|ref|XM_006527253|ref|XM_006527254	chr19:009093549-009093608	mm|19qA	GO:0005634(nucleus)|GO:0005737(cytoplasm)|GO:0005765(lysosomal membrane)|GO:0005829(cytosol)|GO:0005886(plasma membrane)|GO:0005911(cell-cell junction)|GO:0005925(focal adhesion)|GO:0015629(actin cytoskeleton)|GO:0016020(membrane)|GO:0030315(T-tubule)|GO:0031982(vesicle)|GO:0042383(sarcolemma)|GO:0043034(costamere)|GO:0043484(regulation of RNA splicing)|GO:0044291(cell-cell contact zone)|GO:00445…	GTCCTGAGAAAAGTTCCGATTTCTTTTAACAAATGTCATCATGATTAAGGAAATGTCTGG	79026	AHNAK	0
A_55_P2153620	Ahnak	AHNAK nucleoprotein (desmoyokin)	Mus musculus AHNAK nucleoprotein (desmoyokin) (Ahnak), transcript variant 3, mRNA [NM_001039959]	NM_001039959	NM_001039959	66395	chr19	9074153	9074212	+	62620	2	57	A_55_P2153620	FALSE	Mm.203866	ENSMUST00000092955		ref|NM_001039959|ref|NM_001286518|ref|NR_104460|ens|ENSMUST00000092955	chr19:009074153-009074212	mm|19qA	GO:0005634(nucleus)|GO:0005737(cytoplasm)|GO:0005765(lysosomal membrane)|GO:0005829(cytosol)|GO:0005886(plasma membrane)|GO:0005911(cell-cell junction)|GO:0005925(focal adhesion)|GO:0015629(actin cytoskeleton)|GO:0016020(membrane)|GO:0030315(T-tubule)|GO:0031982(vesicle)|GO:0042383(sarcolemma)|GO:0043034(costamere)|GO:0043484(regulation of RNA splicing)|GO:0044291(cell-cell contact zone)|GO:00445…	TTGTGTGACCAAGATTCGCAAAGAAAGAGAGAGAGAGACCGATACAGAAAGAGAAGAAGG	79026	AHNAK	0
A_55_P2153621	Ahnak	AHNAK nucleoprotein (desmoyokin)	Mus musculus AHNAK nucleoprotein (desmoyokin) (Ahnak), transcript variant 4, mRNA [NM_001286518]	NM_001286518	NM_001286518	66395	chr19	9151349	9151408	+	37398	78	318	A_55_P2153621	FALSE	Mm.203866	ENSMUST00000092955		ref|NM_001286518|ref|NM_001039959|ref|NR_104460|ens|ENSMUST00000092955	chr19:009151349-009151408	mm|19qA	GO:0005634(nucleus)|GO:0005737(cytoplasm)|GO:0005765(lysosomal membrane)|GO:0005829(cytosol)|GO:0005886(plasma membrane)|GO:0005911(cell-cell junction)|GO:0005925(focal adhesion)|GO:0015629(actin cytoskeleton)|GO:0016020(membrane)|GO:0030315(T-tubule)|GO:0031982(vesicle)|GO:0042383(sarcolemma)|GO:0043034(costamere)|GO:0043484(regulation of RNA splicing)|GO:0044291(cell-cell contact zone)|GO:00445…	CAGCTGTGGGTATAGGCGACTCTCTTCTTACCTACCCAATAAACTTTTGTCATGCATTGT	79026	AHNAK	0
A_55_P2109613	Ahr	aryl-hydrocarbon receptor	Mus musculus aryl-hydrocarbon receptor (Ahr), mRNA [NM_013464]	NM_013464	NM_013464	11622	chr12	36182783	36182724	-	3176	183	209	A_55_P2109613	FALSE	Mm.341377	ENSMUST00000116436		ref|NM_013464|ens|ENSMUST00000116436|gb|D38417|gb|AK155380	chr12:036182783-036182724	mm|12qA3	GO:0000122(negative regulation of transcription from RNA polymerase II promoter)|GO:0000902(cell morphogenesis)|GO:0001541(ovarian follicle development)|GO:0001568(blood vessel development)|GO:0001569(patterning of blood vessels)|GO:0001782(B cell homeostasis)|GO:0001889(liver development)|GO:0001922(B-1 B cell homeostasis)|GO:0001974(blood vessel remodeling)|GO:0002260(lymphocyte homeostasis)|GO…	CCTTGCTGTCCTTTAAACTGTTACTTGCTTACATATGCCATGCATAGATTTTTGTTAAAG			0
A_51_P254425	Ahrr	aryl-hydrocarbon receptor repressor	Mus musculus aryl-hydrocarbon receptor repressor (Ahrr), mRNA [NM_009644]	NM_009644	NM_009644	11624	chr13	74348612	74348566	-	21531	127	235	A_51_P254425	FALSE	Mm.290446	ENSMUST00000022059		ref|NM_009644|ens|ENSMUST00000022059|ref|XM_006517051|ref|XM_006517049	chr13:074348765-074348705	mm|13qC1	GO:0000122(negative regulation of transcription from RNA polymerase II promoter)|GO:0001191(RNA polymerase II transcription factor binding transcription factor activity involved in negative regulation of transcription)|GO:0003677(DNA binding)|GO:0004871(signal transducer activity)|GO:0005634(nucleus)|GO:0005737(cytoplasm)|GO:0006351(transcription, DNA-dependent)|GO:0006355(regulation of transcrip…	GGAATAAATACAAGTGCCCTTATATTTGCAGATTCGACTGGGGGAAAGTCCTCAAGAACT	57491	AHRR	0
A_52_P534583	Ahsp	alpha hemoglobin stabilizing protein	Mus musculus alpha hemoglobin stabilizing protein (Ahsp), mRNA [NM_133245]	NM_133245	NM_133245	170812	unmapped	-1	-1		59622	11	149	A_52_P534583	FALSE	Mm.423023			ref|NM_133245|gb|BC110627|gb|AK011084|gb|AK028172	unmapped		GO:0005737(cytoplasm)|GO:0006457(protein folding)|GO:0020027(hemoglobin metabolic process)|GO:0030097(hemopoiesis)|GO:0030218(erythrocyte differentiation)|GO:0030492(hemoglobin binding)|GO:0050821(protein stabilization)	TGGTGATTGTGGTTCATGACTGGGTGAACTTGTACACCAACTATTACAAGAAGCTCGTGC			0
A_55_P2382741	AI314604	expressed sequence AI314604	vd44a05.r1 Barstead MPLRB1 Mus musculus cDNA clone IMAGE:803408 5'. [AA473072]		AA473072	102027	chr8	48181864	48181923	+	4259	180	11	A_55_P2382741	FALSE	Mm.324125			gb|AA473072|tc|TC1680442	chr8:48181864-48181923	mm|8qB1.1		GTGTGATTTGCATTTTTACCATTATAAGCAACCTGTGATGGATCAAAGTCAGATGCTATA			0
A_66_P112855	AI413582	expressed sequence AI413582	Mus musculus expressed sequence AI413582 (AI413582), mRNA [NM_001002895]	NM_001002895	NM_001002895	106672	chr17	27700779	27700720	-	9733	163	215	A_66_P112855	FALSE	Mm.61488	ENSMUST00000138728		ref|NM_001002895|ens|ENSMUST00000138728|ens|ENSMUST00000080190|ref|XM_006523413	chr17:027700779-027700720	mm|17qA3.3	GO:0003674(molecular_function)|GO:0005575(cellular_component)|GO:0005576(extracellular region)|GO:0008150(biological_process)	CCCACGGTGACAGGTCCAGATGTATAGGTGTATATGTTTTGTAAATAAAAACTTTTGTGG			0
A_55_P2397869	AI428406	expressed sequence AI428406	BX520338 Soares_thymus_2NbMT Mus musculus cDNA clone IMAGp998I133081 ; IMAGE:1225428, mRNA sequence [BX520338]		BX520338	104812	chr12	100954440	100954381	-	14809	147	232	A_55_P2397869	FALSE	Mm.459109			gb|BX520338|tc|TC1668970	chr12:100954440-100954381	mm|12qE		TAAAAATAGACAGAGGCAACGGTAAAGGAGAAGCAGCTTGGTGTCTGCTTAGAGCTTGAG			0
A_55_P2289040	AI429363	expressed sequence AI429363	UI-M-FY0-cgr-m-18-0-UI.r1 NIH_BMAP_FY0 Mus musculus cDNA clone IMAGE:30363281 5', mRNA sequence [CF532098]		CF532098	100640	chr5	114059554	114059495	-	37161	79	136	A_55_P2289040	FALSE	Mm.393082			gb|CF532098|tc|TC1652002	chr5:114059554-114059495	mm|5qF		ACAAGAGGGATGTCCACACCCTCCTGAGAGTCAGTTTAAAATATCAGCTTAGATACCTGG			0
A_55_P2403325	AI451458	expressed sequence AI451458	UI-M-FY0-cdb-a-22-0-UI.r1 NIH_BMAP_FY0 Mus musculus cDNA clone IMAGE: 6827135 5', mRNA sequence [CA328248]		CA328248	102916	chrX	34457708	34457649	-	11216	158	202	A_55_P2403325	FALSE	Mm.441085			gb|CA328248|tc|TC1689930	chrX:34457708-34457649	mm|XqA3.3		TCAACTTAAGGAAGGAAAGTTTAGTTCTGTTCATGGTCACTTGGCCTCATTAATGTGGCA			0
A_51_P406557	AI464131	expressed sequence AI464131	Mus musculus expressed sequence AI464131 (AI464131), mRNA [NM_001085515]	NM_001085515	NM_001085515	329828	chr4	41443223	41443164	-	20929	129	127	A_51_P406557	FALSE	Mm.27054			ref|NM_001085515|ref|XM_006538010|gb|AK173117|gb|BC036141	chr4:041443223-041443164	mm|4qA5	GO:0003824(catalytic activity)|GO:0004553(hydrolase activity, hydrolyzing O-glycosyl compounds)|GO:0005515(protein binding)|GO:0005975(carbohydrate metabolic process)|GO:0008152(metabolic process)|GO:0008933(lytic transglycosylase activity)|GO:0015923(mannosidase activity)|GO:0015924(mannosyl-oligosaccharide mannosidase activity)|GO:0015925(galactosidase activity)|GO:0015926(glucosidase activity)…	TGAAGCCTTAGTGGGAAAACCATGTTCTAATTCTGGCCGAGATGTGCTTGGCACATGAAT	57462	KIAA1161	0
A_52_P458000	AI467606	expressed sequence AI467606	Mus musculus expressed sequence AI467606 (AI467606), mRNA [NM_178901]	NM_178901	NM_178901	101602	chr7	134237107	134237166	+	48790	44	165	A_52_P458000	FALSE	Mm.490357	ENSMUST00000056288		ref|NM_178901|ens|ENSMUST00000056288|ref|XM_006507162|gb|AK041954	chr7:134237107-134237166	mm|7qF3	GO:0003674(molecular_function)|GO:0005575(cellular_component)|GO:0008150(biological_process)|GO:0016020(membrane)|GO:0016021(integral to membrane)	ATGGCCTATCGAGAACTGAGTTTGTTCCAATATGGGAATGAAGATTTTTTCCCAGAGAAA	283897	C16orf54	0
A_51_P490747	AI593442	expressed sequence AI593442	Mus musculus expressed sequence AI593442 (AI593442), transcript variant 1, mRNA [NM_001286641]	NM_001286641	NM_001286641	330941	chr9	52481388	52481329	-	58853	13	48	A_51_P490747	FALSE	Mm.335160	ENSMUST00000098768		ref|NM_001286641|ref|NM_178906|ens|ENSMUST00000098768|ref|XM_011242565	chr9:052481388-052481329	mm|9qA5.3	GO:0003674(molecular_function)|GO:0005575(cellular_component)|GO:0008150(biological_process)|GO:0016020(membrane)|GO:0016021(integral to membrane)	CTTAGCTTTAATTGAGAGACAGTGCATTATTCGGGTTGCTTTACCCATTTGAGGAAGGAT	399947	C11orf87	0
A_55_P2081105	AI607873	expressed sequence AI607873	Mus musculus expressed sequence AI607873 (AI607873), mRNA [NM_001204910]	NM_001204910	NM_001204910	226691	chr1	175653722	175653663	-	12133	156	7	A_55_P2081105	FALSE	Mm.440876	ENSMUST00000042610		ref|NM_001204910|ens|ENSMUST00000042610|ref|XM_011238797|ref|XM_011238798	chr1:175653722-175653663	mm|1qH3	GO:0000122(negative regulation of transcription from RNA polymerase II promoter)|GO:0000978(RNA polymerase II core promoter proximal region sequence-specific DNA binding)|GO:0001047(core promoter binding)|GO:0001078(RNA polymerase II core promoter proximal region sequence-specific DNA binding transcription factor activity involved in negative regulation of transcription)|GO:0003690(double-strande…	GCTCTACTAAAAGCAGCACTTAATTCTAAGAAATGGGGCTTTCTTATATGCTTTACACAT			0
A_55_P2115166	AI661453	expressed sequence AI661453	Mus musculus expressed sequence AI661453 (AI661453), mRNA [NM_145489]	NM_145489	NM_145489	224833	chr17	47607033	47607092	+	14527	148	140	A_55_P2115166	FALSE	Mm.218444	ENSMUST00000037701		ref|NM_145489|ens|ENSMUST00000037701|ens|ENSMUST00000150819|gb|BC006605	chr17:047607033-047607092	mm|17qC	GO:0003674(molecular_function)|GO:0005575(cellular_component)|GO:0008150(biological_process)	CCTGGATGGTCCAGGGTTATATCAGTGAACTGGAATATATGTGTATATATTCTAATATGC	647024	C6orf132	0
A_55_P2362970	AI836737	expressed sequence AI836737	BB456416 RIKEN full-length enriched, 12 days embryo spinal ganglion Mus musculus cDNA clone D130046J21 3'. [BB456416]		BB456416	103288	chr10	32611574	32611633	+	34763	87	11	A_55_P2362970	FALSE	Mm.396727			gb|BB456416|tc|TC1638640	chr10:032611574-032611632	mm|10qA4		ATCTTGTATCTGGTATCTGCCTTAAGGGAAACCCAATCAAATAAAATATTCCTCAAGGGT			0
A_55_P2380132	AI844869	expressed sequence AI844869	UI-M-AH1-agx-d-12-0-UI.r1 NIH_BMAP_MCE_N Mus musculus cDNA clone UI-M-AH1-agx-d-12-0-UI 5'. [BE862015]		BE862015	98445	chr1	167702754	167702813	+	3323	182	244	A_55_P2380132	FALSE	Mm.441905			gb|BE862015|tc|TC1641969	chr1:167702754-167702813	mm|1qH2.3		AAATTGTCTAAAGAATCCAGTTGTCCCAGTATTGATTTTGTGGCCGTGTGCGTGGGAGGA			0
A_55_P2170817	AI847159	expressed sequence AI847159	Mus musculus expressed sequence AI847159 (AI847159), long non-coding RNA [NR_045264]	NR_045264	NR_045264	100048701	chr2	129003945	129003886	-	485	191	16	A_55_P2170817	FALSE	Mm.428544			ref|NR_045264|tc|TC1666183|tc|TC1605242	chr2:129003945-129003886	mm|2qF1		CTAAAATCTCCTTATGGCACTTAAATGTTTATGGGTAATAAAAGGAATCACTCCTCTCCT			0
A_55_P2288741	AI852580	expressed sequence AI852580	UI-M-BH0-aiu-a-10-0-UI.s1 NIH_BMAP_M_S1 Mus musculus cDNA clone UI-M-BH0-aiu-a-10-0-UI 3'. [AI852580]		AI852580	104896	chr12	88322016	88322075	+	60403	8	228	A_55_P2288741	FALSE	Mm.380740			gb|AI852580	chr12:88322016-88322075	mm|12qD2		AACTGTGAGCAGAGATACCTCGAATGGCTCTTCCACTGAGGAAGCCTGGGCTCCCCTTCA			0
A_55_P2362763	AI853106	expressed sequence AI853106	603356119F1 NIH_MGC_94 Mus musculus cDNA clone IMAGE:5363333 5', mRNA sequence [BI734998]		BI734998	101190	chr6	48384767	48384708	-	40966	68	69	A_55_P2362763	FALSE	Mm.441839			gb|BI734998|tc|TC1670631	chr6:48384767-48384708	mm|6qB2.3		TCAAGCCTAGCGGTCAAAACAAATGACAAATGCTCAGAACCAAGTGAGCAAGACTGACCA			0
A_55_P2234964	AI987986	expressed sequence AI987986	um10a02.x1 Sugano mouse kidney mkia Mus musculus cDNA clone IMAGE:2182634 3'. [AI987986]		AI987986	105573	chr14	27022692	27022751	+	15378	146	77	A_55_P2234964	FALSE	Mm.443881			gb|AI987986	chr14:27022692-27022751	mm|14qA3		GAGGCTTTATCAGCATTATGGATATCAAGGGTACACTACAGAGAGAGGAAGAGAAGAAAA			0
A_51_P400543	Aif1	allograft inflammatory factor 1	Mus musculus allograft inflammatory factor 1 (Aif1), mRNA [NM_019467]	NM_019467	NM_019467	11629	chr17	35308018	35307959	-	22731	123	132	A_51_P400543	FALSE	Mm.10747	ENSMUST00000172679		ref|NM_019467|ens|ENSMUST00000172679|ens|ENSMUST00000025257|ens|ENSMUST00000173324	chr17:035308018-035307959	mm|17qB1	GO:0001726(ruffle)|GO:0001774(microglial cell activation)|GO:0001891(phagocytic cup)|GO:0001934(positive regulation of protein phosphorylation)|GO:0003779(actin binding)|GO:0005509(calcium ion binding)|GO:0005515(protein binding)|GO:0005622(intracellular)|GO:0005634(nucleus)|GO:0005737(cytoplasm)|GO:0005829(cytosol)|GO:0005856(cytoskeleton)|GO:0005884(actin filament)|GO:0005886(plasma membrane)|G…	GAGCTTCTGATGACAGCAGCATGGAAAAAAGAAACAGTCGTGAGCCAGAGTCAGACTAAA	199	AIF1	0
A_51_P472829	Aif1l	allograft inflammatory factor 1-like	Mus musculus allograft inflammatory factor 1-like (Aif1l), mRNA [NM_145144]	NM_145144	NM_145144	108897	chr2	31828806	31828865	+	48498	45	93	A_51_P472829	FALSE	Mm.24838	ENSMUST00000001920		ref|NM_145144|ens|ENSMUST00000001920|gb|AK028955|gb|BC024599	chr2:031828806-031828865	mm|2qB	GO:0003779(actin binding)|GO:0005509(calcium ion binding)|GO:0005737(cytoplasm)|GO:0005856(cytoskeleton)|GO:0005884(actin filament)|GO:0005886(plasma membrane)|GO:0005925(focal adhesion)|GO:0008150(biological_process)|GO:0015629(actin cytoskeleton)|GO:0016020(membrane)|GO:0042995(cell projection)|GO:0043234(protein complex)|GO:0046872(metal ion binding)|GO:0051015(actin filament binding)|GO:00700…	TGTAACCAGCAGTTTGGGGATTGCCAAGTATGGCTTTGCCCTGTGACTCAAAAGATGTTT	83543	AIF1L	0
A_55_P2002849	Aifm3	apoptosis-inducing factor, mitochondrion-associated 3	Mus musculus apoptosis-inducing factor, mitochondrion-associated 3 (Aifm3), transcript variant 1, mRNA [NM_001291070]	NM_001291070	NM_001291070	72168	chr16	17507515	17507574	+	1403	188	148	A_55_P2002849	FALSE	Mm.40038	ENSMUST00000134952		ref|NM_001291070|ref|NM_175178|ens|ENSMUST00000134952|ens|ENSMUST00000023448	chr16:017507515-017507574	mm|16qA3	GO:0005739(mitochondrion)|GO:0005743(mitochondrial inner membrane)|GO:0005783(endoplasmic reticulum)|GO:0006810(transport)|GO:0006915(apoptotic process)|GO:0008748(N-ethylmaleimide reductase activity)|GO:0016491(oxidoreductase activity)|GO:0043738(reduced coenzyme F420 dehydrogenase activity)|GO:0043826(sulfur oxygenase reductase activity)|GO:0043883(malolactic enzyme activity)|GO:0043914(NADPH:s…	GGACGATTTTCCCAGCAAGCCCCTTCAACATTACCTTAAAATTAAAACGCATGTCTCAGC	150209	AIFM3	0
A_55_P2116059	Aim1	absent in melanoma 1	Mus musculus absent in melanoma 1 (Aim1), mRNA [NM_172393]	NM_172393	NM_172393	11630	chr10	43670506	43670447	-	25342	115	158	A_55_P2116059	FALSE	Mm.292082	ENSMUST00000020017		ref|NM_172393|ens|ENSMUST00000020017|ref|XM_006512498|ref|XM_006512499	chr10:043670506-043670447	mm|10qB2	GO:0003674(molecular_function)|GO:0005575(cellular_component)|GO:0008150(biological_process)	GGTAAGATATCCTATAAACGCCTGTTGAGTTTGTCTCTTGAATTAAACTTATTCCTGGTT	202	AIM1	0
A_51_P418809	Airn	antisense Igf2r RNA	Mus musculus antisense Igf2r RNA (Airn), transcript variant 4, long non-coding RNA [NR_027784]	NR_027784	NR_027784	104103	chr17	13008303	13008362	+	3362	182	166	A_51_P418809	FALSE	Mm.44983			ref|NR_027784|ref|NR_002853|gb|AK012942|tc|TC1588556	chr17:13008303-13008362	mm|17qA1	GO:0000228(nuclear chromosome)|GO:0003674(molecular_function)|GO:0006349(regulation of gene expression by genetic imprinting)|GO:0051570(regulation of histone H3-K9 methylation)	AGGATTTTAAACACATGTCTGAAAATACCCTAAATATCCTAAAGACACACTTCTTTCCCC			0
A_55_P2032643	Ajap1	adherens junction associated protein 1	Mus musculus adherens junction associated protein 1 (Ajap1), mRNA [NM_001099299]	NM_001099299	NM_001099299	230959	chr4	152756433	152756374	-	12492	154	274	A_55_P2032643	FALSE	Mm.318874	ENSMUST00000149177		ref|NM_001099299|ens|ENSMUST00000149177|ref|XM_006538824|gb|BC147229	chr4:152756433-152756374	mm|4qE2	GO:0003674(molecular_function)|GO:0005575(cellular_component)|GO:0005886(plasma membrane)|GO:0007155(cell adhesion)|GO:0008150(biological_process)|GO:0016020(membrane)|GO:0016021(integral to membrane)|GO:0030054(cell junction)	GATAGGCATCTCATCCCTGTGGCCTTTGTGTCTGAGAAATGGTTTGAAATCTCCTGCTGA	55966	AJAP1	0
A_52_P620898	Ajap1	adherens junction associated protein 1	Mus musculus adherens junction associated protein 1 (Ajap1), mRNA [NM_001099299]	NM_001099299	NM_001099299	230959	chr4	152747456	152747397	-	34590	87	30	A_52_P620898	FALSE	Mm.318874	ENSMUST00000105646		ref|NM_001099299|ref|XM_006538824|ens|ENSMUST00000105646|tc|TC1652155	chr4:152747456-152747397	mm|4qE2	GO:0003674(molecular_function)|GO:0005575(cellular_component)|GO:0005886(plasma membrane)|GO:0007155(cell adhesion)|GO:0008150(biological_process)|GO:0016020(membrane)|GO:0016021(integral to membrane)|GO:0030054(cell junction)	CGACTGCCAACGAGTGAGCCTGAGAACCAGGTTGGGTGGGTGGCAGATTCTCGAACATTT	55966	AJAP1	0
A_52_P131548	Ajuba	ajuba LIM protein	Mus musculus ajuba LIM protein (Ajuba), mRNA [NM_010590]	NM_010590	NM_010590	16475	chr14	55186871	55186812	-	18751	135	220	A_52_P131548	FALSE	Mm.100253	ENSMUST00000054487		ref|NM_010590|ens|ENSMUST00000054487|gb|AK012077|gb|BC011035	chr14:055186871-055186812	mm|14qC3	GO:0000122(negative regulation of transcription from RNA polymerase II promoter)|GO:0000932(cytoplasmic mRNA processing body)|GO:0001666(response to hypoxia)|GO:0003682(chromatin binding)|GO:0003714(transcription corepressor activity)|GO:0005515(protein binding)|GO:0005634(nucleus)|GO:0005667(transcription factor complex)|GO:0005737(cytoplasm)|GO:0005829(cytosol)|GO:0005856(cytoskeleton)|GO:00058…	GGAAGCTGGAGAGAAGAAAAATAGGTTGACTTGGTTCTAGCCGCTTGGCTGAAACTTGAA	84962	AJUBA	0
A_52_P464129	AK010878	cDNA sequence AK010878	Mus musculus cDNA sequence AK010878 (AK010878), mRNA [NM_001142938]	NM_001142938	NM_001142938	100233175	chr12	103992083	103992024	-	36531	81	84	A_52_P464129	FALSE	Mm.291222	ENSMUST00000173969		ref|NM_001142938|ens|ENSMUST00000173969|gb|AK010878|tc|TC1627224	chr12:103992083-103992024	mm|12qE		ACCTGTGCTCTAGTTGGGGAACTCATTTCTTTTGTTTGATTGGAACAAGTTCATCACAGA	84520	C14orf142	0
A_55_P2082688	Ak1	adenylate kinase 1	Mus musculus adenylate kinase 1 (Ak1), transcript variant 2, mRNA [NM_001198790]	NM_001198790	NM_001198790	11636	chr2	32490509	32490568	+	37591	78	259	A_55_P2082688	FALSE	Mm.29189			ref|NM_001198790|ref|NM_001198791|ref|NM_021515|ref|NM_001198792	chr2:032490509-032490568	mm|2qB	GO:0000166(nucleotide binding)|GO:0001520(outer dense fiber)|GO:0004017(adenylate kinase activity)|GO:0004550(nucleoside diphosphate kinase activity)|GO:0005524(ATP binding)|GO:0005737(cytoplasm)|GO:0005886(plasma membrane)|GO:0006139(nucleobase-containing compound metabolic process)|GO:0006165(nucleoside diphosphate phosphorylation)|GO:0006172(ADP biosynthetic process)|GO:0007050(cell cycle arre…	GGGCCACCTTTCCTTCTGCATTGCCTATTTAAGCTGTCCTTTAAAATAAATAAATGTATT	203	AK1	0
A_55_P2147220	Ak2	adenylate kinase 2	Mus musculus adenylate kinase 2 (Ak2), transcript variant 2, mRNA [NM_016895]	NM_016895	NM_016895	11637	chr4	128687940	128687999	+	53420	30	89	A_55_P2147220	FALSE	Mm.29460	ENSMUST00000102604		ref|NM_016895|ens|ENSMUST00000102604|ref|XR_376293|gb|AK010951	chr4:128687940-128687999	mm|4qD2.2	GO:0000166(nucleotide binding)|GO:0004017(adenylate kinase activity)|GO:0005524(ATP binding)|GO:0005739(mitochondrion)|GO:0005743(mitochondrial inner membrane)|GO:0005758(mitochondrial intermembrane space)|GO:0005829(cytosol)|GO:0006139(nucleobase-containing compound metabolic process)|GO:0006172(ADP biosynthetic process)|GO:0016301(kinase activity)|GO:0016310(phosphorylation)|GO:0016740(transfer…	GGAGGGGCTCCTCGAGAGAAGATTGGAACAGTGGCAGTGTTATAATTAGTAAGGTTTTTT	204	AK2	0
A_55_P1957613	Ak2	adenylate kinase 2	Mus musculus adenylate kinase 2 (Ak2), transcript variant 2, mRNA [NM_016895]	NM_016895	NM_016895	11637	chr4	128688714	128688773	+	123	192	84	A_55_P1957613	FALSE	Mm.29460	ENSMUST00000102604		ref|NM_016895|ens|ENSMUST00000102604|ref|XR_376293|gb|BC008610	chr4:128688714-128688773	mm|4qD2.2	GO:0000166(nucleotide binding)|GO:0004017(adenylate kinase activity)|GO:0005524(ATP binding)|GO:0005739(mitochondrion)|GO:0005743(mitochondrial inner membrane)|GO:0005758(mitochondrial intermembrane space)|GO:0005829(cytosol)|GO:0006139(nucleobase-containing compound metabolic process)|GO:0006172(ADP biosynthetic process)|GO:0016301(kinase activity)|GO:0016310(phosphorylation)|GO:0016740(transfer…	AACTGACCAAATGCTGCCATGTTTGGCCCCTGAGTCAATAAAATATGTTGAAAATTTGTA	204	AK2	0
A_55_P2089223	Ak4	adenylate kinase 4	Mus musculus adenylate kinase 4 (Ak4), transcript variant 1, mRNA [NM_001177602]	NM_001177602	NM_001177602	11639	chr4	101139464	101139523	+	6008	174	122	A_55_P2089223	FALSE	Mm.42040			ref|NM_001177602|ref|NM_001177604|ref|NM_001177605|ref|NM_009647	chr4:101139464-101139523	mm|4qC6	GO:0000166(nucleotide binding)|GO:0004017(adenylate kinase activity)|GO:0004550(nucleoside diphosphate kinase activity)|GO:0005524(ATP binding)|GO:0005525(GTP binding)|GO:0005739(mitochondrion)|GO:0005759(mitochondrial matrix)|GO:0006139(nucleobase-containing compound metabolic process)|GO:0006165(nucleoside diphosphate phosphorylation)|GO:0009142(nucleoside triphosphate biosynthetic process)|GO:…	GTGCTTAGTTCAGAGTCTGTTCTGTATCTGCTATCCTAACTATTCATTGTATTCATTGAT	205	AK4	0
A_55_P2082070	Ak6	adenylate kinase 6	Mus musculus adenylate kinase 6 (Ak6), mRNA [NM_027592]	NM_027592	NM_027592	102216272	chr13	101435915	101435974	+	13896	150	90	A_55_P2082070	FALSE	Mm.301148	ENSMUST00000022135		ref|NM_027592|ens|ENSMUST00000022135|gb|AK014903|gb|AK012905	chr13:101435915-101435974	mm|13qD1	GO:0004017(adenylate kinase activity)|GO:0005654(nucleoplasm)|GO:0015030(Cajal body)|GO:0016020(membrane)|GO:0046939(nucleotide phosphorylation)	GACAATATCAACCAAATCTCAAAATGGATTGAGCAGTGGGTCAAAGATCATAACCCTTAA	6880	TAF9	0
A_51_P101006	Ak8	adenylate kinase 8	Mus musculus adenylate kinase 8 (Ak8), mRNA [NM_001033874]	NM_001033874	NM_001033874	68870	chr2	28668519	28668578	+	3039	183	156	A_51_P101006	FALSE	Mm.273318	ENSMUST00000074156		ref|NM_001033874|ens|ENSMUST00000074156|ref|XM_006498288|ref|XM_011239170	chr2:028668519-028668578	mm|2qA3	GO:0000166(nucleotide binding)|GO:0004017(adenylate kinase activity)|GO:0004127(cytidylate kinase activity)|GO:0004550(nucleoside diphosphate kinase activity)|GO:0005524(ATP binding)|GO:0005575(cellular_component)|GO:0005737(cytoplasm)|GO:0006139(nucleobase-containing compound metabolic process)|GO:0006165(nucleoside diphosphate phosphorylation)|GO:0009142(nucleoside triphosphate biosynthetic pro…	CCTATACACAGTTTTTGAGTATATAGAGAGCGGGATCATTAATCCTCTGCCCAGGAAAGT	158067	AK8	0
A_52_P517289	Akap1	A kinase (PRKA) anchor protein 1	Mus musculus A kinase (PRKA) anchor protein 1 (Akap1), transcript variant 2, mRNA [NM_001042541]	NM_001042541	NM_001042541	11640	chr11	88705775	88705716	-	52344	33	273	A_52_P517289	FALSE	Mm.2969	ENSMUST00000153787		ref|NM_001042541|ref|NM_009648|ref|NR_104310|ens|ENSMUST00000153787	chr11:088705775-088705716	mm|11qC	GO:0003676(nucleic acid binding)|GO:0003723(RNA binding)|GO:0005515(protein binding)|GO:0005739(mitochondrion)|GO:0005741(mitochondrial outer membrane)|GO:0005743(mitochondrial inner membrane)|GO:0005759(mitochondrial matrix)|GO:0005783(endoplasmic reticulum)|GO:0005811(lipid particle)|GO:0008017(microtubule binding)|GO:0010614(negative regulation of cardiac muscle hypertrophy)|GO:0016020(membran…	GGGGCAGTGCTCAGATCCTGTCAGTACTTCGGGGCTTGAAGACTCTTGCACAGAGACCAT	8165	AKAP1	0
A_55_P2343151	Akap1	A kinase (PRKA) anchor protein 1	Mus musculus A kinase (PRKA) anchor protein 1 (Akap1), transcript variant 2, mRNA [NM_001042541]	NM_001042541	NM_001042541	11640	chr11	88692180	88692121	-	15778	144	262	A_55_P2343151	FALSE	Mm.2969	ENSMUST00000143720		ref|NM_001042541|ref|NM_009648|ref|NR_104310|ens|ENSMUST00000143720	chr11:088692180-088692121	mm|11qC	GO:0003676(nucleic acid binding)|GO:0003723(RNA binding)|GO:0005515(protein binding)|GO:0005739(mitochondrion)|GO:0005741(mitochondrial outer membrane)|GO:0005743(mitochondrial inner membrane)|GO:0005759(mitochondrial matrix)|GO:0005783(endoplasmic reticulum)|GO:0005811(lipid particle)|GO:0008017(microtubule binding)|GO:0010614(negative regulation of cardiac muscle hypertrophy)|GO:0016020(membran…	CTTTAGCATTGTGCAATTTAAGAATAACTTAAGGATCTTGGACTTTACATAAATCTTGAA	8165	AKAP1	0
A_55_P2099810	Akap12	A kinase (PRKA) anchor protein (gravin) 12	Mus musculus A kinase (PRKA) anchor protein (gravin) 12 (Akap12), mRNA [NM_031185]	NM_031185	NM_031185	83397	chr10	5991309	5991250	-	45079	55	44	A_55_P2099810	FALSE	Mm.27481	ENSMUST00000045730		ref|NM_031185|ens|ENSMUST00000045730|gb|BC138364|gb|BC138365	chr10:005991309-005991250	mm|10qA1	GO:0005737(cytoplasm)|GO:0005856(cytoskeleton)|GO:0005886(plasma membrane)|GO:0005925(focal adhesion)|GO:0006605(protein targeting)|GO:0007165(signal transduction)|GO:0008179(adenylate cyclase binding)|GO:0010739(positive regulation of protein kinase A signaling cascade)|GO:0030159(receptor signaling complex scaffold activity)|GO:0030819(positive regulation of cAMP biosynthetic process)|GO:005101…	TCCATTAAGAAATTTATTCCTGGACGGCGGAAGAAAAGGGCAGATGGGAAGCAAGAACAG	9590	AKAP12	0
A_55_P2052166	Akap13	A kinase (PRKA) anchor protein 13	Mus musculus A kinase (PRKA) anchor protein 13 (Akap13), mRNA [NM_029332]	NM_029332	NM_029332	75547	chr7	82881198	82881257	+	28571	105	260	A_55_P2052166	FALSE	Mm.216107	ENSMUST00000166315		ref|NM_029332|ens|ENSMUST00000166315|ref|XM_006541251|ref|XM_006541256	chr7:082881198-082881257	mm|7qD2	GO:0005737(cytoplasm)|GO:0010611(regulation of cardiac muscle hypertrophy)|GO:0016020(membrane)|GO:0017048(Rho GTPase binding)|GO:0032947(protein complex scaffold)|GO:0045859(regulation of protein kinase activity)|GO:0048471(perinuclear region of cytoplasm)|GO:0051018(protein kinase A binding)|GO:0051168(nuclear export)|GO:1900169(regulation of glucocorticoid mediated signaling pathway)	AAAGAAGCTGATTGTAAGAGAAGTGGCCCATGAGGAGAAAGGCCTGTTCCTCATCAGTAT	11214	AKAP13	0
A_66_P124551	Akap13	A kinase (PRKA) anchor protein 13	Mus musculus A kinase (PRKA) anchor protein 13 (Akap13), mRNA [NM_029332]	NM_029332	NM_029332	75547	chr7	82899226	82899285	+	47342	48	110	A_66_P124551	FALSE	Mm.216107	ENSMUST00000166315		ref|NM_029332|ens|ENSMUST00000166315|ref|XM_006541256|ref|XM_006541250	chr7:082899226-082899285	mm|7qD2	GO:0005737(cytoplasm)|GO:0010611(regulation of cardiac muscle hypertrophy)|GO:0016020(membrane)|GO:0017048(Rho GTPase binding)|GO:0032947(protein complex scaffold)|GO:0045859(regulation of protein kinase activity)|GO:0048471(perinuclear region of cytoplasm)|GO:0051018(protein kinase A binding)|GO:0051168(nuclear export)|GO:1900169(regulation of glucocorticoid mediated signaling pathway)	AAGTCGTCTCCAAATGCTGTATGAACATTTCTGTACTAAGCCCTATTAAATAAAAAGTCG	11214	AKAP13	0
A_55_P2056871	Akap13	A kinase (PRKA) anchor protein 13	Mus musculus A kinase (PRKA) anchor protein 13 (Akap13), mRNA [NM_029332]	NM_029332	NM_029332	75547	chr7	82842265	82849254	+	25421	115	327	A_55_P2056871	FALSE	Mm.216107	ENSMUST00000166315		ref|NM_029332|ens|ENSMUST00000166315|ref|XM_006541252|ref|XM_006541250	chr7:082842265-082842324	mm|7qD2	GO:0005737(cytoplasm)|GO:0010611(regulation of cardiac muscle hypertrophy)|GO:0016020(membrane)|GO:0017048(Rho GTPase binding)|GO:0032947(protein complex scaffold)|GO:0045859(regulation of protein kinase activity)|GO:0048471(perinuclear region of cytoplasm)|GO:0051018(protein kinase A binding)|GO:0051168(nuclear export)|GO:1900169(regulation of glucocorticoid mediated signaling pathway)	TTAGTCGCACCTTCAGCTACATCAGGAATAAAATGTCCAGCAGCAAGAAGAGCAAAGTAA	11214	AKAP13	0
A_52_P306305	Akap2	A kinase (PRKA) anchor protein 2	Mus musculus A kinase (PRKA) anchor protein 2 (Akap2), transcript variant 1, mRNA [NM_001035533]	NM_001035533	NM_001035533	11641	chr4	57905932	57905991	+	50044	40	281	A_52_P306305	FALSE	Mm.467752			ref|NM_001035533|ref|NM_001304544|ref|NM_001035532|ref|NM_009649	chr4:057905932-057905991	mm|4qB3	GO:0007015(actin filament organization)|GO:0007178(transmembrane receptor protein serine/threonine kinase signaling pathway)|GO:0008104(protein localization)|GO:0019904(protein domain specific binding)|GO:0043234(protein complex)|GO:0051018(protein kinase A binding)|GO:0051291(protein heterooligomerization)	ATTAAAGTGCATACAAACTCAACAACCCTCATGTAGACCAGAAGCTGCAATACACCATGA	11217	AKAP2	0
A_52_P1042732	Akap5	A kinase (PRKA) anchor protein 5	Mus musculus A kinase (PRKA) anchor protein 5 (Akap5), mRNA [NM_001101471]	NM_001101471	NM_001101471	238276	chr12	77434981	77435040	+	1008	189	282	A_52_P1042732	FALSE	Mm.311452	ENSMUST00000154078		ref|NM_001101471|ens|ENSMUST00000154078|ens|ENSMUST00000095610|ref|XM_006515842	chr12:077434981-077435040	mm|12qC3	GO:0001664(G-protein coupled receptor binding)|GO:0001934(positive regulation of protein phosphorylation)|GO:0003779(actin binding)|GO:0005515(protein binding)|GO:0005516(calmodulin binding)|GO:0005623(cell)|GO:0005737(cytoplasm)|GO:0005856(cytoskeleton)|GO:0005886(plasma membrane)|GO:0006605(protein targeting)|GO:0007165(signal transduction)|GO:0007194(negative regulation of adenylate cyclase ac…	CCATAAGAGTACCACTTTGTATCCTCATTGAAATTAGTACTACTGTGACTCAAAAGCTGA	9495	AKAP5	0
A_55_P2110037	Akap7	A kinase (PRKA) anchor protein 7	Mus musculus A kinase (PRKA) anchor protein 7 (Akap7), mRNA [NM_018747]	NM_018747	NM_018747	432442	chr10	24888956	24888897	-	16922	141	269	A_55_P2110037	FALSE	Mm.487103	ENSMUST00000175979		ref|NM_018747|ens|ENSMUST00000175979|ref|XM_006512789|ref|XM_006512786	chr10:024888956-024888897	mm|10qA4	GO:0000166(nucleotide binding)|GO:0005515(protein binding)|GO:0005634(nucleus)|GO:0005737(cytoplasm)|GO:0005829(cytosol)|GO:0005886(plasma membrane)|GO:0007178(transmembrane receptor protein serine/threonine kinase signaling pathway)|GO:0008022(protein C-terminus binding)|GO:0008104(protein localization)|GO:0010738(regulation of protein kinase A signaling cascade)|GO:0016020(membrane)|GO:0016208(…	GTATTCCTTTATACGGCCCTACGTTTTCATGCCCTGTAATAAAAGTACTCTTTCCCCTGT	9465	AKAP7	0
A_55_P2110032	Akap7	A kinase (PRKA) anchor protein 7	Mus musculus A kinase (PRKA) anchor protein 7 (Akap7), mRNA [NM_018747]	NM_018747	NM_018747	432442	chr10	24889987	24889928	-	32612	93	50	A_55_P2110032	FALSE	Mm.487103	ENSMUST00000041984		ref|NM_018747|ens|ENSMUST00000041984|ens|ENSMUST00000175979|ref|XM_006512789	chr10:024889987-024889928	mm|10qA4	GO:0000166(nucleotide binding)|GO:0005515(protein binding)|GO:0005634(nucleus)|GO:0005737(cytoplasm)|GO:0005829(cytosol)|GO:0005886(plasma membrane)|GO:0007178(transmembrane receptor protein serine/threonine kinase signaling pathway)|GO:0008022(protein C-terminus binding)|GO:0008104(protein localization)|GO:0010738(regulation of protein kinase A signaling cascade)|GO:0016020(membrane)|GO:0016208(…	ATGCCTGGTAAAGTGTTTATGAACTCTCAGCCCATTAAATAGCTCTTTGGTGAGTAAACA	9465	AKAP7	0
A_55_P2155776	Aknad1	AKNA domain containing 1	Mus musculus AKNA domain containing 1 (Aknad1), mRNA [NM_177859]	NM_177859	NM_177859	329738	chr3	108559744	108559803	+	6032	174	74	A_55_P2155776	FALSE	Mm.72322	ENSMUST00000123556		ref|NM_177859|ens|ENSMUST00000123556|ref|XM_006501610|ref|XM_011240150	chr3:108559744-108559803	mm|3qF3	GO:0003674(molecular_function)|GO:0005737(cytoplasm)|GO:0008150(biological_process)	CTCCCATGGAAAACAGATGTGCCAGAAACTGAAAGAACAGACTGACCAACTGAAGAATAA			0
A_55_P2095196	Akr1b10	aldo-keto reductase family 1, member B10 (aldose reductase)	Mus musculus aldo-keto reductase family 1, member B10 (aldose reductase) (Akr1b10), mRNA [NM_172398]	NM_172398	NM_172398	67861	chr6	34346689	34346748	+	44362	57	166	A_55_P2095196	FALSE	Mm.70371	ENSMUST00000139156		ref|NM_172398|ens|ENSMUST00000139156|ens|ENSMUST00000038383|ref|XM_006506527	chr6:034346689-034346748	mm|6qB1	GO:0004032(alditol:NADP+ 1-oxidoreductase activity)|GO:0005739(mitochondrion)|GO:0005829(cytosol)|GO:0016918(retinal binding)|GO:0042572(retinol metabolic process)|GO:0052650(NADP-retinol dehydrogenase activity)|GO:0055114(oxidation-reduction process)|GO:0070401(NADP+ binding)|GO:0070402(NADPH binding)	TCTTCACTGATATGCAACCCGCTCCTACTGACTCCTATTTTTGCCAAGCCTATTGGATAT	441282	AKR1B15	0
A_51_P486618	Akr1b10	aldo-keto reductase family 1, member B10 (aldose reductase)	Mus musculus aldo-keto reductase family 1, member B10 (aldose reductase) (Akr1b10), mRNA [NM_172398]	NM_172398	NM_172398	67861	chr6	34346793	34346852	+	31565	96	176	A_51_P486618	FALSE	Mm.70371	ENSMUST00000139156		ref|NM_172398|ens|ENSMUST00000139156|ens|ENSMUST00000038383|ref|XM_006506527	chr6:034346793-034346852	mm|6qB1	GO:0004032(alditol:NADP+ 1-oxidoreductase activity)|GO:0005739(mitochondrion)|GO:0005829(cytosol)|GO:0016918(retinal binding)|GO:0042572(retinol metabolic process)|GO:0052650(NADP-retinol dehydrogenase activity)|GO:0055114(oxidation-reduction process)|GO:0070401(NADP+ binding)|GO:0070402(NADPH binding)	CATGTTCAACTAGAAGCAGACTGTCACAGGAAGATGCATCTCAGCAAAGGGCAATGTTTG	441282	AKR1B15	0
A_51_P242859	Akr1c12	aldo-keto reductase family 1, member C12	Mus musculus aldo-keto reductase family 1, member C12 (Akr1c12), mRNA [NM_013777]	NM_013777	NM_013777	622402	chr13	4272257	4272198	-	17530	139	38	A_51_P242859	FALSE	Mm.380356	ENSMUST00000021632		ref|NM_013777|ens|ENSMUST00000021632|gb|AF177041|gb|AB027237	chr13:004272257-004272198	mm|13qA1	GO:0004033(aldo-keto reductase (NADP) activity)|GO:0005575(cellular_component)|GO:0006805(xenobiotic metabolic process)|GO:0055114(oxidation-reduction process)	AGTAAGCTATTGGATTACTGCAAGTCAAAAGACATTGTTCTTGTTGCTTACGGTGCTCTG	8644	AKR1C3	0
A_66_P132249	Akr1c13	aldo-keto reductase family 1, member C13	Mus musculus aldo-keto reductase family 1, member C13 (Akr1c13), mRNA [NM_013778]	NM_013778	NM_013778	27384	chr13	4204668	4204727	+	13415	152	67	A_66_P132249	FALSE	Mm.27447	ENSMUST00000021634		ref|NM_013778|ens|ENSMUST00000021634|ref|XM_006516482|gb|AK008949	chr13:004204668-004204727	mm|13qA1	GO:0000252(C-3 sterol dehydrogenase (C-4 sterol decarboxylase) activity)|GO:0004033(aldo-keto reductase (NADP) activity)|GO:0004448(isocitrate dehydrogenase activity)|GO:0004495(mevaldate reductase activity)|GO:0006805(xenobiotic metabolic process)|GO:0008875(gluconate dehydrogenase activity)|GO:0016229(steroid dehydrogenase activity)|GO:0016491(oxidoreductase activity)|GO:0018451(epoxide dehydro…	TGTGTGGACAGTGATGCTGGCAATATGACCAAGATGGACTGTTGGATGGACTTGTCATTT	8644	AKR1C3	0
A_55_P2007155	Akr1c14	aldo-keto reductase family 1, member C14	Mus musculus aldo-keto reductase family 1, member C14 (Akr1c14), mRNA [NM_134072]	NM_134072	NM_134072	105387	chr13	4089325	4089383	+	25512	115	145	A_55_P2007155	FALSE	Mm.26838	ENSMUST00000118717		ref|NM_134072|ens|ENSMUST00000118717|ens|ENSMUST00000041768|ref|XM_011244251	chr13:004089324-004089383	mm|13qA1	GO:0005575(cellular_component)|GO:0016229(steroid dehydrogenase activity)|GO:0047023(androsterone dehydrogenase activity)|GO:0055114(oxidation-reduction process)	GTCGGTTTTCTGAAACATGATCTCATATGTTTATAGGTAAACGAGTCAGACTTACAAAAG	8644	AKR1C3	0
A_55_P2093093	AL117821	expressed sequence AL117821	Mus musculus adult male epididymis cDNA, RIKEN full-length enriched library, clone:9230102N05 product:unclassifiable, full insert sequence. [AK136722]		AK136722	404580	chr10	81507506	81507447	-	43813	59	279	A_55_P2093093	FALSE	Mm.421328			gb|AK136722|riken|9230102N05	chr10:81507506-81507447	mm|10qC1	GO:0003674(molecular_function)|GO:0005575(cellular_component)|GO:0008150(biological_process)	GGATTGCCTCAGTTTCTGTTTTCTTTATTGCTTCTATTTCCATTTTCAGGTCTCAGACAG			0
A_51_P327451	Alas2	aminolevulinic acid synthase 2, erythroid	Mus musculus aminolevulinic acid synthase 2, erythroid (Alas2), transcript variant 1, mRNA [NM_009653]	NM_009653	NM_009653	11656	chrX	147004993	147005052	+	46287	51	252	A_51_P327451	FALSE	Mm.302724	ENSMUST00000112715		ref|NM_009653|ref|NM_001102446|ens|ENSMUST00000112715|ens|ENSMUST00000066337	chrX:147004993-147005052	mm|XqF3	GO:0001666(response to hypoxia)|GO:0003824(catalytic activity)|GO:0003870(5-aminolevulinate synthase activity)|GO:0005623(cell)|GO:0005739(mitochondrion)|GO:0005743(mitochondrial inner membrane)|GO:0005759(mitochondrial matrix)|GO:0006778(porphyrin-containing compound metabolic process)|GO:0006783(heme biosynthetic process)|GO:0006879(cellular iron ion homeostasis)|GO:0008152(metabolic process)|G…	TTTGGGAACATGGGACCCCAATATGTTACCACCTATGCTTAAGGAGCCAGCTGCCTTGGA	212	ALAS2	0
A_51_P359272	Alcam	activated leukocyte cell adhesion molecule	Mus musculus activated leukocyte cell adhesion molecule (Alcam), mRNA [NM_009655]	NM_009655	NM_009655	11658	chr16	52270785	52268908	-	57170	18	134	A_51_P359272	FALSE	Mm.288282	ENSMUST00000164888		ref|NM_009655|ens|ENSMUST00000164888|ens|ENSMUST00000023312|gb|AB003026	unmapped		GO:0005515(protein binding)|GO:0005925(focal adhesion)|GO:0007155(cell adhesion)|GO:0007411(axon guidance)|GO:0008045(motor axon guidance)|GO:0009897(external side of plasma membrane)|GO:0016020(membrane)|GO:0016021(integral to membrane)|GO:0030424(axon)|GO:0043025(neuronal cell body)|GO:0070062(extracellular vesicular exosome)	AGTAAACTCCCTGAATGTCTCTGCGATAAGTATTCCAGAGCACGATGAGGCAGACGATAT	214	ALCAM	0
A_51_P215887	Aldh18a1	aldehyde dehydrogenase 18 family, member A1	Mus musculus aldehyde dehydrogenase 18 family, member A1 (Aldh18a1), transcript variant 1, mRNA [NM_019698]	NM_019698	NM_019698	56454	chr19	40624767	40624730	-	47039	49	60	A_51_P215887	FALSE	Mm.233117	ENSMUST00000025979		ref|NM_019698|ref|NM_153554|ens|ENSMUST00000025979|ens|ENSMUST00000176939	chr19:040625103-040625045	mm|19qC3	GO:0000166(nucleotide binding)|GO:0003824(catalytic activity)|GO:0004349(glutamate 5-kinase activity)|GO:0004350(glutamate-5-semialdehyde dehydrogenase activity)|GO:0005524(ATP binding)|GO:0005737(cytoplasm)|GO:0005739(mitochondrion)|GO:0005743(mitochondrial inner membrane)|GO:0006536(glutamate metabolic process)|GO:0006561(proline biosynthetic process)|GO:0006592(ornithine biosynthetic process)|…	AACCTTTAACATTTTCATTGGGAAACGGTGACTGAGACAGACTGACTGTATCCACTGGGG	5832	ALDH18A1	0
A_51_P334942	Aldh1a1	aldehyde dehydrogenase family 1, subfamily A1	Mus musculus aldehyde dehydrogenase family 1, subfamily A1 (Aldh1a1), mRNA [NM_013467]	NM_013467	NM_013467	11668	chr19	20717764	20717823	+	9248	164	202	A_51_P334942	FALSE	Mm.250866	ENSMUST00000087638		ref|NM_013467|ens|ENSMUST00000087638|gb|M74570|gb|BC044729	chr19:020717764-020717823	mm|19qB	GO:0001758(retinal dehydrogenase activity)|GO:0002072(optic cup morphogenesis involved in camera-type eye development)|GO:0002138(retinoic acid biosynthetic process)|GO:0004028(3-chloroallyl aldehyde dehydrogenase activity)|GO:0004029(aldehyde dehydrogenase (NAD) activity)|GO:0005634(nucleus)|GO:0005737(cytoplasm)|GO:0006979(response to oxidative stress)|GO:0008152(metabolic process)|GO:0016491(o…	GACTAGTTGTGACTTAAGCTCTGTCCCTCAGTGACTCCTTGAAGTACTCACCACACATAA	216	ALDH1A1	0
A_51_P383399	Aldh1a7	aldehyde dehydrogenase family 1, subfamily A7	Mus musculus aldehyde dehydrogenase family 1, subfamily A7 (Aldh1a7), mRNA [NM_011921]	NM_011921	NM_011921	26358	chr19	20767612	20767553	-	22542	124	181	A_51_P383399	FALSE	Mm.14609	ENSMUST00000025656		ref|NM_011921|ens|ENSMUST00000025656|gb|U96401|gb|BC032880	chr19:020767612-020767553	mm|19qB	GO:0001758(retinal dehydrogenase activity)|GO:0004028(3-chloroallyl aldehyde dehydrogenase activity)|GO:0004029(aldehyde dehydrogenase (NAD) activity)|GO:0005737(cytoplasm)|GO:0008152(metabolic process)|GO:0016491(oxidoreductase activity)|GO:0016620(oxidoreductase activity, acting on the aldehyde or oxo group of donors, NAD or NADP as acceptor)|GO:0018479(benzaldehyde dehydrogenase (NAD+) activit…	TTCCTTGAACTATGTACCATGCATGATAACTGAAAAGTTAGCTGCTCTATTCCTCGGGGT	216	ALDH1A1	0
A_55_P1983733	Aldh1l1	aldehyde dehydrogenase 1 family, member L1	Mus musculus aldehyde dehydrogenase 1 family, member L1 (Aldh1l1), mRNA [NM_027406]	NM_027406	NM_027406	107747	chr6	90549091	90549150	+	19327	134	51	A_55_P1983733	FALSE	Mm.30035	ENSMUST00000032175		ref|NM_027406|ens|ENSMUST00000032175|ens|ENSMUST00000130418|ref|XM_006505279	chr6:090549091-090549150	mm|6qD1	GO:0003824(catalytic activity)|GO:0004029(aldehyde dehydrogenase (NAD) activity)|GO:0004030(aldehyde dehydrogenase [NAD(P)+] activity)|GO:0005515(protein binding)|GO:0005737(cytoplasm)|GO:0005739(mitochondrion)|GO:0006730(one-carbon metabolic process)|GO:0008152(metabolic process)|GO:0008168(methyltransferase activity)|GO:0009058(biosynthetic process)|GO:0009258(10-formyltetrahydrofolate cataboli…	AATCAGAAGTGGCTCCAAGTGGAGTGAGCAGTCATGTCCCCCATGAATAAAAATTGTGAG	10840	ALDH1L1	0
A_52_P498193	Aldh1l2	aldehyde dehydrogenase 1 family, member L2	Mus musculus aldehyde dehydrogenase 1 family, member L2 (Aldh1l2), mRNA [NM_153543]	NM_153543	NM_153543	216188	chr10	82950630	82950571	-	24857	117	143	A_52_P498193	FALSE	Mm.263138	ENSMUST00000020497		ref|NM_153543|ens|ENSMUST00000020497|ref|XM_006513505|ref|XM_011243403	chr10:082950630-082950571	mm|10qC1	GO:0003824(catalytic activity)|GO:0004029(aldehyde dehydrogenase (NAD) activity)|GO:0005737(cytoplasm)|GO:0005739(mitochondrion)|GO:0006730(one-carbon metabolic process)|GO:0008152(metabolic process)|GO:0008168(methyltransferase activity)|GO:0009058(biosynthetic process)|GO:0009258(10-formyltetrahydrofolate catabolic process)|GO:0016155(formyltetrahydrofolate dehydrogenase activity)|GO:0016491(ox…	TAAATTGCCTTCCTTAAGTTTTGCTTTTTTGTTTCTGATTTCAGGATTTATATGGGGCGG	160428	ALDH1L2	0
A_52_P116134	Aldh2	aldehyde dehydrogenase 2, mitochondrial	Mus musculus aldehyde dehydrogenase 2, mitochondrial (Aldh2), mRNA [NM_009656]	NM_009656	NM_009656	11669	chr5	122022690	122022137	-	424	191	138	A_52_P116134	FALSE	Mm.284446	ENSMUST00000129753		ref|NM_009656|ens|ENSMUST00000129753|ens|ENSMUST00000133033|gb|AK204164	chr5:122022196-122022137	mm|5qF	GO:0004029(aldehyde dehydrogenase (NAD) activity)|GO:0005515(protein binding)|GO:0005739(mitochondrion)|GO:0008152(metabolic process)|GO:0016491(oxidoreductase activity)|GO:0016620(oxidoreductase activity, acting on the aldehyde or oxo group of donors, NAD or NADP as acceptor)|GO:0042802(identical protein binding)|GO:0043066(negative regulation of apoptotic process)|GO:0055114(oxidation-reduction…	CCTCAGGTGGATGAAACTCAGTTTAAGAAGATCCTCGGCTACATCAAATCGGGACAACAA			0
A_55_P2101246	Aldh6a1	aldehyde dehydrogenase family 6, subfamily A1	Mus musculus aldehyde dehydrogenase family 6, subfamily A1 (Aldh6a1), mRNA [NM_134042]	NM_134042	NM_134042	104776	chr12	85772860	85772801	-	45115	55	299	A_55_P2101246	FALSE	Mm.247510	ENSMUST00000085192		ref|NM_134042|ens|ENSMUST00000085192|gb|AK171581|gb|AK170305	chr12:085772860-085772801	mm|12qD1	GO:0004029(aldehyde dehydrogenase (NAD) activity)|GO:0004491(methylmalonate-semialdehyde dehydrogenase (acylating) activity)|GO:0005654(nucleoplasm)|GO:0005739(mitochondrion)|GO:0006210(thymine catabolic process)|GO:0006573(valine metabolic process)|GO:0006574(valine catabolic process)|GO:0008152(metabolic process)|GO:0016491(oxidoreductase activity)|GO:0016620(oxidoreductase activity, acting on …	TCAGGATGAAGTGATAAGTTAGCTTTTAGTTACATGTGCCATTCTTCATGGTTTGCCTCG	4329	ALDH6A1	0
A_51_P338485	Aldh6a1	aldehyde dehydrogenase family 6, subfamily A1	Mus musculus aldehyde dehydrogenase family 6, subfamily A1 (Aldh6a1), mRNA [NM_134042]	NM_134042	NM_134042	104776	chr12	85771894	85771835	-	53634	29	317	A_51_P338485	FALSE	Mm.247510	ENSMUST00000085192		ref|NM_134042|ens|ENSMUST00000085192|gb|AK033587|gb|AK155814	chr12:085771894-085771835	mm|12qD1	GO:0004029(aldehyde dehydrogenase (NAD) activity)|GO:0004491(methylmalonate-semialdehyde dehydrogenase (acylating) activity)|GO:0005654(nucleoplasm)|GO:0005739(mitochondrion)|GO:0006210(thymine catabolic process)|GO:0006573(valine metabolic process)|GO:0006574(valine catabolic process)|GO:0008152(metabolic process)|GO:0016491(oxidoreductase activity)|GO:0016620(oxidoreductase activity, acting on …	TAATCATAATCAACAGATTTGACCAGCTACTTGTGCTCAAAAGGGTTTCTTGTTTCTTAG	4329	ALDH6A1	0
A_55_P2070992	Aldoc	aldolase C, fructose-bisphosphate	Mus musculus aldolase C, fructose-bisphosphate (Aldoc), transcript variant 1, mRNA [NM_009657]	NM_009657	NM_009657	11676	chr11	78140198	78140257	+	42887	62	163	A_55_P2070992	FALSE	Mm.7729	ENSMUST00000017534		ref|NM_009657|ref|NM_001303423|ens|ENSMUST00000017534|ens|ENSMUST00000102478	chr11:078140198-078140257	mm|11qB5	GO:0003824(catalytic activity)|GO:0004332(fructose-bisphosphate aldolase activity)|GO:0005737(cytoplasm)|GO:0005739(mitochondrion)|GO:0006096(glycolysis)|GO:0006915(apoptotic process)|GO:0007568(aging)|GO:0008092(cytoskeletal protein binding)|GO:0016829(lyase activity)|GO:0030388(fructose 1,6-bisphosphate metabolic process)|GO:0030424(axon)|GO:0051289(protein homotetramerization)|GO:0051290(prote…	TCCAGCCCTGACTCGTGCTCCTTATGCTCTGAGTACATAGCAAATAAATGAGAGCAAAAC	230	ALDOC	0
A_51_P219849	Alg13	asparagine-linked glycosylation 13	Mus musculus asparagine-linked glycosylation 13 (Alg13), transcript variant 1, mRNA [NM_026247]	NM_026247	NM_026247	67574	chrX	140759482	140759541	+	7458	170	173	A_51_P219849	FALSE	Mm.249084	ENSMUST00000070801		ref|NM_026247|ens|ENSMUST00000070801|gb|AK089102|gb|AK014790	chrX:140759482-140759541	mm|XqF2	GO:0003824(catalytic activity)|GO:0004577(N-acetylglucosaminyldiphosphodolichol N-acetylglucosaminyltransferase activity)|GO:0005783(endoplasmic reticulum)|GO:0005975(carbohydrate metabolic process)|GO:0006508(proteolysis)|GO:0008152(metabolic process)|GO:0008233(peptidase activity)|GO:0008234(cysteine-type peptidase activity)|GO:0016740(transferase activity)|GO:0016757(transferase activity, tran…	GTGTATTTAAATCCTTGTGCCTATGATGATATTGGAAGATGTAGATAGAATTCCCTGGAA			0
A_52_P215829	Alg13	asparagine-linked glycosylation 13	Mus musculus asparagine-linked glycosylation 13 (Alg13), transcript variant 2, non-coding RNA [NR_037145]	NR_037145	NR_037145	67574	chrX	140808125	140808184	+	62420	2	130	A_52_P215829	FALSE	Mm.249084	ENSMUST00000132416		ref|NR_037145|ens|ENSMUST00000132416|ens|ENSMUST00000154827|ens|ENSMUST00000149427	chrX:140808125-140808184	mm|XqF2	GO:0003824(catalytic activity)|GO:0004577(N-acetylglucosaminyldiphosphodolichol N-acetylglucosaminyltransferase activity)|GO:0005783(endoplasmic reticulum)|GO:0005975(carbohydrate metabolic process)|GO:0006508(proteolysis)|GO:0008152(metabolic process)|GO:0008233(peptidase activity)|GO:0008234(cysteine-type peptidase activity)|GO:0016740(transferase activity)|GO:0016757(transferase activity, tran…	TCATGGAGCAGTCTACTATCCAGTAATGACAGATCCCTATGGGTCTCCTTTGTTGGGATT			0
A_55_P2054300	Alg8	asparagine-linked glycosylation 8 (alpha-1,3-glucosyltransferase)	Mus musculus asparagine-linked glycosylation 8 (alpha-1,3-glucosyltransferase) (Alg8), mRNA [NM_199035]	NM_199035	NM_199035	381903	chr7	104540582	104540641	+	58497	14	104	A_55_P2054300	FALSE	Mm.279683	ENSMUST00000098300		ref|NM_199035|ens|ENSMUST00000098300|gb|AK141341|gb|AK166755	chr7:104540582-104540641	mm|7qE1	GO:0000033(alpha-1,3-mannosyltransferase activity)|GO:0005575(cellular_component)|GO:0005783(endoplasmic reticulum)|GO:0005789(endoplasmic reticulum membrane)|GO:0006487(protein N-linked glycosylation)|GO:0006490(oligosaccharide-lipid intermediate biosynthetic process)|GO:0016020(membrane)|GO:0016021(integral to membrane)|GO:0016740(transferase activity)|GO:0016757(transferase activity, transferr…	GCTGGTACTGACCATTGTTAGGATATAGTGCATAATTAGATTCTGTACCTAAGGAAATAT	79053	ALG8	0
A_55_P2139501	Alk	anaplastic lymphoma kinase	Mus musculus anaplastic lymphoma kinase (Alk), mRNA [NM_007439]	NM_007439	NM_007439	11682	chr17	72218416	72218357	-	41422	66	142	A_55_P2139501	FALSE	Mm.311854			ref|NM_007439|gb|D83002|tc|TC1590974|nap|NAP020727-001	chr17:072218416-072218357	mm|17qE1.3	GO:0000166(nucleotide binding)|GO:0000187(activation of MAPK activity)|GO:0004672(protein kinase activity)|GO:0004713(protein tyrosine kinase activity)|GO:0004714(transmembrane receptor protein tyrosine kinase activity)|GO:0005515(protein binding)|GO:0005524(ATP binding)|GO:0005886(plasma membrane)|GO:0005887(integral to plasma membrane)|GO:0006468(protein phosphorylation)|GO:0007165(signal trans…	TTCCATGTCTCATAGGGGGAGTCCTAGGTGTTTCCTTTGCCTTATGAATATGAACCACTC	238	ALK	0
A_52_P522023	Alkbh1	alkB, alkylation repair homolog 1 (E. coli)	Mus musculus alkB, alkylation repair homolog 1 (E. coli) (Alkbh1), mRNA [NM_001102565]	NM_001102565	NM_001102565	211064	chr12	88769696	88769637	-	60489	8	56	A_52_P522023	FALSE	Mm.486235	ENSMUST00000161712		ref|NM_001102565|ens|ENSMUST00000161712|ens|ENSMUST00000160113|ens|ENSMUST00000162247	chr12:088769696-088769637	mm|12qD2	GO:0001701(in utero embryonic development)|GO:0001764(neuron migration)|GO:0001890(placenta development)|GO:0003906(DNA-(apurinic or apyrimidinic site) lyase activity)|GO:0005515(protein binding)|GO:0005719(nuclear euchromatin)|GO:0005739(mitochondrion)|GO:0006281(DNA repair)|GO:0006307(DNA dealkylation involved in DNA repair)|GO:0008198(ferrous iron binding)|GO:0010468(regulation of gene express…	CCCATCTTAGAGCGAAAACTGATTAGAGTTTGTCCAGAGAAGTGTCCTACTCCATCCAGT	8846	ALKBH1	0
A_52_P240447	Alms1	Alstrom syndrome 1	Mus musculus Alstrom syndrome 1 (Alms1), mRNA [NM_145223]	NM_145223	NM_145223	236266	chr6	85627751	85627810	+	17480	139	138	A_52_P240447	FALSE	Mm.246967	ENSMUST00000159498		ref|NM_145223|ens|ENSMUST00000159498|ens|ENSMUST00000161983|ens|ENSMUST00000072018	chr6:085627751-085627810	mm|6qC3	GO:0001678(cellular glucose homeostasis)|GO:0001736(establishment of planar polarity)|GO:0005622(intracellular)|GO:0005634(nucleus)|GO:0005654(nucleoplasm)|GO:0005737(cytoplasm)|GO:0005813(centrosome)|GO:0005814(centriole)|GO:0006629(lipid metabolic process)|GO:0007286(spermatid development)|GO:0007605(sensory perception of sound)|GO:0016197(endosomal transport)|GO:0019722(calcium-mediated signal…	CAAGTTCGGACAAGTTGGACAAGACCAAGATGGATTACACCAGAATTAAGAGCCTCAGCA	7840	ALMS1	0
A_55_P2454521	Alms1	Alstrom syndrome 1	Mus musculus Alstrom syndrome 1 (Alms1), mRNA [NM_145223]	NM_145223	NM_145223	236266	chr6	85601346	85601405	+	35961	83	239	A_55_P2454521	FALSE	Mm.246967	ENSMUST00000072018		ref|NM_145223|ens|ENSMUST00000072018|ref|XM_006506053|ref|XM_006506050	chr6:085601346-085601405	mm|6qC3	GO:0001678(cellular glucose homeostasis)|GO:0001736(establishment of planar polarity)|GO:0005622(intracellular)|GO:0005634(nucleus)|GO:0005654(nucleoplasm)|GO:0005737(cytoplasm)|GO:0005813(centrosome)|GO:0005814(centriole)|GO:0006629(lipid metabolic process)|GO:0007286(spermatid development)|GO:0007605(sensory perception of sound)|GO:0016197(endosomal transport)|GO:0019722(calcium-mediated signal…	AAAGAAGGGATTTATAGCAAGAGGGCTGCAACAAAGGGGAAAAACCCCTCTCAGAAAGGT	7840	ALMS1	0
A_52_P467449	Alox12	arachidonate 12-lipoxygenase	Mus musculus arachidonate 12-lipoxygenase (Alox12), mRNA [NM_007440]	NM_007440	NM_007440	11684	chr11	70055774	70055715	-	56171	21	164	A_52_P467449	FALSE	Mm.12286	ENSMUST00000000329		ref|NM_007440|ens|ENSMUST00000000329|ref|XM_011248677|ref|XM_011251257	chr11:070055774-070055715	mm|11qB3	GO:0004052(arachidonate 12-lipoxygenase activity)|GO:0005506(iron ion binding)|GO:0005737(cytoplasm)|GO:0005829(cytosol)|GO:0006629(lipid metabolic process)|GO:0006631(fatty acid metabolic process)|GO:0006928(cellular component movement)|GO:0008096(juvenile hormone epoxide hydrolase activity)|GO:0008284(positive regulation of cell proliferation)|GO:0010595(positive regulation of endothelial cell …	ACACTCCACATTAGTATTCTAACTACAGGGCACTAAATGTCTTGCTGTTATGAGGAACAA	239	ALOX12	0
A_51_P447258	Alox12b	arachidonate 12-lipoxygenase, 12R type	Mus musculus arachidonate 12-lipoxygenase, 12R type (Alox12b), mRNA [NM_009659]	NM_009659	NM_009659	11686	chr11	68979536	68979770	+	17384	140	1	A_51_P447258	FALSE	Mm.340329	ENSMUST00000036424		ref|NM_009659|ens|ENSMUST00000036424|gb|Y14334|gb|BC113149	unmapped		GO:0004052(arachidonate 12-lipoxygenase activity)|GO:0005506(iron ion binding)|GO:0005737(cytoplasm)|GO:0006497(protein lipidation)|GO:0006629(lipid metabolic process)|GO:0006631(fatty acid metabolic process)|GO:0006665(sphingolipid metabolic process)|GO:0010628(positive regulation of gene expression)|GO:0016491(oxidoreductase activity)|GO:0016702(oxidoreductase activity, acting on single donors …	ATGTGCCACCCTCTGTATAAGCTTCTCATCCCTCACACTCGGTACAACGTCCAGATCAAT	242	ALOX12B	0
A_51_P252565	Alox15	arachidonate 15-lipoxygenase	Mus musculus arachidonate 15-lipoxygenase (Alox15), mRNA [NM_009660]	NM_009660	NM_009660	11687	chr11	70159339	70159115	-	33351	91	211	A_51_P252565	FALSE	Mm.4584	ENSMUST00000019068		ref|NM_009660|ens|ENSMUST00000019068|ref|XM_006532036|ref|XM_006537114	unmapped		GO:0001503(ossification)|GO:0002820(negative regulation of adaptive immune response)|GO:0004052(arachidonate 12-lipoxygenase activity)|GO:0005506(iron ion binding)|GO:0005546(phosphatidylinositol-4,5-bisphosphate binding)|GO:0005737(cytoplasm)|GO:0005811(lipid particle)|GO:0005829(cytosol)|GO:0005886(plasma membrane)|GO:0006629(lipid metabolic process)|GO:0006631(fatty acid metabolic process)|GO:…	GCTCTGGCAAGTCATGAATCGGTACGTGGTGGGAATGTTCGATCTCTACTACAAGACCGA	246	ALOX15	0
A_51_P247249	Alox5	arachidonate 5-lipoxygenase	Mus musculus arachidonate 5-lipoxygenase (Alox5), mRNA [NM_009662]	NM_009662	NM_009662	11689	chr6	116360385	116360326	-	51254	36	158	A_51_P247249	FALSE	Mm.41072	ENSMUST00000169625		ref|NM_009662|ens|ENSMUST00000169625|ens|ENSMUST00000167447|ens|ENSMUST00000026795	chr6:116360385-116360326	mm|6qE3	GO:0002526(acute inflammatory response)|GO:0002540(leukotriene production involved in inflammatory response)|GO:0004051(arachidonate 5-lipoxygenase activity)|GO:0005506(iron ion binding)|GO:0005515(protein binding)|GO:0005615(extracellular space)|GO:0005634(nucleus)|GO:0005635(nuclear envelope)|GO:0005641(nuclear envelope lumen)|GO:0005737(cytoplasm)|GO:0005829(cytosol)|GO:0006691(leukotriene met…	TTTATGCTTCCTCCAATTGCTTGCATAGAGTAGGTGCTTAGAGAAAGTTCTTGGATTAAG	240	ALOX5	0
A_51_P235687	Alox5ap	arachidonate 5-lipoxygenase activating protein	Mus musculus arachidonate 5-lipoxygenase activating protein (Alox5ap), mRNA [NM_009663]	NM_009663	NM_009663	11690	chr5	150099347	150099406	+	62064	3	186	A_51_P235687	FALSE	Mm.19844	ENSMUST00000071130		ref|NM_009663|ens|ENSMUST00000071130|gb|BC026209|gb|AK004002	chr5:150099347-150099406	mm|5qG3	GO:0002540(leukotriene production involved in inflammatory response)|GO:0002675(positive regulation of acute inflammatory response)|GO:0004051(arachidonate 5-lipoxygenase activity)|GO:0005515(protein binding)|GO:0005634(nucleus)|GO:0005635(nuclear envelope)|GO:0005783(endoplasmic reticulum)|GO:0005829(cytosol)|GO:0006691(leukotriene metabolic process)|GO:0008047(enzyme activator activity)|GO:0016…	AGAGACGCATCATAACGCAATGCCGCGAAGGCTTCTGCTCCTCTTCAAGCTGTAGATGCT	241	ALOX5AP	0
A_55_P2101055	Alpk1	alpha-kinase 1	Mus musculus alpha-kinase 1 (Alpk1), mRNA [NM_027808]	NM_027808	NM_027808	71481	chr3	127373909	127373850	-	59551	11	291	A_55_P2101055	FALSE	Mm.158704	ENSMUST00000029662		ref|NM_027808|ens|ENSMUST00000029662|ens|ENSMUST00000160586|gb|AK173191	chr3:127373909-127373850	mm|3qG2	GO:0002230(positive regulation of defense response to virus by host)|GO:0003674(molecular_function)|GO:0004674(protein serine/threonine kinase activity)|GO:0004675(transmembrane receptor protein serine/threonine kinase activity)|GO:0004676(3-phosphoinositide-dependent protein kinase activity)|GO:0004677(DNA-dependent protein kinase activity)|GO:0004679(AMP-activated protein kinase activity)|GO:00…	GAAATATGCCATCGTCTTTCTCTGACTAGACCTTCACTAGAGCAAACAAGTAAGGTATAG	80216	ALPK1	0
A_51_P494125	Alpl	alkaline phosphatase, liver/bone/kidney	Mus musculus alkaline phosphatase, liver/bone/kidney (Alpl), transcript variant 1, mRNA [NM_007431]	NM_007431	NM_007431	11647	chr4	137297716	137297658	-	7371	170	20	A_51_P494125	FALSE	Mm.288186	ENSMUST00000030551		ref|NM_007431|ref|NM_001287176|ref|NM_001287172|ens|ENSMUST00000030551	chr4:137297716-137297658	mm|4qD3	GO:0001649(osteoblast differentiation)|GO:0001958(endochondral ossification)|GO:0003006(developmental process involved in reproduction)|GO:0003824(catalytic activity)|GO:0004035(alkaline phosphatase activity)|GO:0005515(protein binding)|GO:0005578(proteinaceous extracellular matrix)|GO:0005615(extracellular space)|GO:0005886(plasma membrane)|GO:0008152(metabolic process)|GO:0016020(membrane)|GO:0…	CCTCTTTTTGGTGTTGGTTAAAAGGGAACACAAGACATTTAAATAAAACATCCCAAATAT	249	ALPL	0
A_55_P1962906	Als2cl	ALS2 C-terminal like	Mus musculus ALS2 C-terminal like (Als2cl), transcript variant 1, mRNA [NM_001146060]	NM_001146060	NM_001146060	235633	chr9	110802956	110803015	+	56548	20	66	A_55_P1962906	FALSE	Mm.86338	ENSMUST00000084926		ref|NM_001146060|ref|NM_001146059|ref|NM_146228|ens|ENSMUST00000084926	chr9:110802956-110803015	mm|9qF3	GO:0005089(Rho guanyl-nucleotide exchange factor activity)|GO:0005096(GTPase activator activity)|GO:0005515(protein binding)|GO:0005737(cytoplasm)|GO:0007032(endosome organization)|GO:0008104(protein localization)|GO:0016023(cytoplasmic membrane-bounded vesicle)|GO:0017112(Rab guanyl-nucleotide exchange factor activity)|GO:0017137(Rab GTPase binding)|GO:0035023(regulation of Rho protein signal tr…	CCCTACTTTTCTGGGTGATGGCCACAATTACAGTCTACTTATTTATTCAGGATTTTTAAT	259173	ALS2CL	0
A_51_P154684	Alyref	Aly/REF export factor	Mus musculus Aly/REF export factor (Alyref), mRNA [NM_011568]	NM_011568	NM_011568	21681	chr11	120455916	120455857	-	59353	12	31	A_51_P154684	FALSE	Mm.1886	ENSMUST00000155325		ref|NM_011568|ens|ENSMUST00000155325|gb|U89876|gb|BB054790	chr11:120455916-120455857	mm|11qE2	GO:0000166(nucleotide binding)|GO:0003676(nucleic acid binding)|GO:0003697(single-stranded DNA binding)|GO:0003723(RNA binding)|GO:0005634(nucleus)|GO:0005681(spliceosomal complex)|GO:0005737(cytoplasm)|GO:0006397(mRNA processing)|GO:0006810(transport)|GO:0008380(RNA splicing)|GO:0051028(mRNA transport)	ACTGAGTTATTTTTGGGATAAATATTACTGGTTGCTGTTGTGGAGAAGGTGGCATTTTCA	10189	ALYREF	0
A_52_P337236	Alyref2	Aly/REF export factor 2	Mus musculus Aly/REF export factor 2 (Alyref2), mRNA [NM_019484]	NM_019484	NM_019484	56009	chr1	173434342	173434401	+	62961	1	31	A_52_P337236	FALSE	Mm.389208	ENSMUST00000081527		ref|NM_019484|ens|ENSMUST00000081527|gb|AK048243|gb|AJ252141	chr1:173434342-173434401	mm|1qH3	GO:0000166(nucleotide binding)|GO:0003676(nucleic acid binding)|GO:0003697(single-stranded DNA binding)|GO:0003723(RNA binding)|GO:0005575(cellular_component)|GO:0005634(nucleus)|GO:0005681(spliceosomal complex)|GO:0005737(cytoplasm)|GO:0006397(mRNA processing)|GO:0006810(transport)|GO:0008380(RNA splicing)|GO:0051028(mRNA transport)	AAGGGGTAGAGGCACTGGCAGGAACTCAAAGCAGCAGCAGCTTTTTGCAGAGGAGTTGGA	10189	ALYREF	0
A_51_P181891	Amer2	APC membrane recruitment 2	Mus musculus APC membrane recruitment 2 (Amer2), transcript variant 1, mRNA [NM_028113]	NM_028113	NM_028113	72125	chr14	60999755	60999814	+	7627	169	164	A_51_P181891	FALSE	Mm.275499	ENSMUST00000022561		ref|NM_028113|ref|NM_001164705|ens|ENSMUST00000022561|gb|AK032651	chr14:060999755-060999814	mm|14qD1	GO:0005515(protein binding)|GO:0005546(phosphatidylinositol-4,5-bisphosphate binding)|GO:0005886(plasma membrane)|GO:0008289(lipid binding)|GO:0016020(membrane)|GO:0016055(Wnt receptor signaling pathway)|GO:0090090(negative regulation of canonical Wnt receptor signaling pathway)	TCTATCTCTAGGAAGAAAACAGAGGTTTAGTATGGCTGGCTCAGATCGTTGGTCTGAGGA	219287	AMER2	0
A_52_P375312	Amica1	adhesion molecule, interacts with CXADR antigen 1	Mus musculus adhesion molecule, interacts with CXADR antigen 1 (Amica1), mRNA [NM_001005421]	NM_001005421	NM_001005421	270152	chr9	44915486	44915545	+	44092	58	50	A_52_P375312	FALSE	Mm.190461	ENSMUST00000050020		ref|NM_001005421|ens|ENSMUST00000050020|ref|XM_006510386|ref|XM_006510383	chr9:044915486-044915545	mm|9qA5.2	GO:0002376(immune system process)|GO:0005178(integrin binding)|GO:0005886(plasma membrane)|GO:0005923(tight junction)|GO:0007155(cell adhesion)|GO:0007157(heterophilic cell-cell adhesion)|GO:0016020(membrane)|GO:0016021(integral to membrane)|GO:0030054(cell junction)|GO:0030593(neutrophil chemotaxis)|GO:0035696(monocyte extravasation)|GO:0042803(protein homodimerization activity)|GO:0046629(gamma…	AAAGCATCCAGTTTGGTCCGCTCTTCAGTCAGATCCAAGTAATGTGGTTGAAAAGAAAAA	120425	JAML	0
A_55_P2127204	Amigo1	adhesion molecule with Ig like domain 1	Mus musculus adhesion molecule with Ig like domain 1 (Amigo1), transcript variant 1, mRNA [NM_146137]	NM_146137	NM_146137	229715	chr3	107994625	107994684	+	39534	72	309	A_55_P2127204	FALSE	Mm.275752	ENSMUST00000106656		ref|NM_146137|ref|NM_001004293|ref|NM_001287093|ens|ENSMUST00000106656	chr3:107994625-107994684	mm|3qF2.3	GO:0005515(protein binding)|GO:0005886(plasma membrane)|GO:0007155(cell adhesion)|GO:0007156(homophilic cell adhesion)|GO:0007157(heterophilic cell-cell adhesion)|GO:0007275(multicellular organismal development)|GO:0007399(nervous system development)|GO:0007409(axonogenesis)|GO:0007413(axonal fasciculation)|GO:0007420(brain development)|GO:0008076(voltage-gated potassium channel complex)|GO:00154…	AAACCTCAGAGCCCATGGGCTCTATAACTAGACAATGACCATTAAACCTGGCTTGAGTCT	57463	AMIGO1	0
A_51_P176972	Amigo2	adhesion molecule with Ig like domain 2	Mus musculus adhesion molecule with Ig like domain 2 (Amigo2), transcript variant 1, mRNA [NM_178114]	NM_178114	NM_178114	105827	chr15	97075321	97075262	-	25235	116	43	A_51_P176972	FALSE	Mm.24005	ENSMUST00000053106		ref|NM_178114|ref|NM_001164563|ref|NM_001164602|ens|ENSMUST00000053106	chr15:097075321-097075262	mm|15qF1	GO:0003674(molecular_function)|GO:0005634(nucleus)|GO:0005886(plasma membrane)|GO:0007155(cell adhesion)|GO:0007156(homophilic cell adhesion)|GO:0007157(heterophilic cell-cell adhesion)|GO:0007420(brain development)|GO:0016020(membrane)|GO:0016021(integral to membrane)|GO:0043066(negative regulation of apoptotic process)|GO:0043069(negative regulation of programmed cell death)|GO:0051965(positive…	CACTATTTTGTCTTTTGAGATGAAACCAAATGGTGTCTTTTTAAGATGGTTGCTAGGAAG	347902	AMIGO2	0
A_52_P502754	Ampd3	adenosine monophosphate deaminase 3	Mus musculus adenosine monophosphate deaminase 3 (Ampd3), transcript variant 1, mRNA [NM_009667]	NM_009667	NM_009667	11717	chr7	117954980	117955039	+	59770	10	182	A_52_P502754	FALSE	Mm.3238	ENSMUST00000170374		ref|NM_009667|ref|NM_001276301|ens|ENSMUST00000170374|ens|ENSMUST00000005829	chr7:117954980-117955039	mm|7qF1	GO:0003876(AMP deaminase activity)|GO:0005575(cellular_component)|GO:0006188(IMP biosynthetic process)|GO:0009117(nucleotide metabolic process)|GO:0009168(purine ribonucleoside monophosphate biosynthetic process)|GO:0016787(hydrolase activity)|GO:0019239(deaminase activity)|GO:0032264(IMP salvage)|GO:0046031(ADP metabolic process)|GO:0046033(AMP metabolic process)|GO:0046034(ATP metabolic process…	ACTTCTGTTCTATGTTATTATCTAGGACTCAACGAGTCATCTCAAACCATATTCTGTGAA	272	AMPD3	0
A_55_P1996314	Amy2a5	amylase 2a5	Mus musculus amylase 2a5 (Amy2a5), mRNA [NM_001042711]	NM_001042711	NM_001042711	109959	chr3	113084840	113084781	-	52131	34	43	A_55_P1996314	FALSE	Mm.275426	ENSMUST00000098667		ref|NM_001042711|ens|ENSMUST00000098667|ens|ENSMUST00000098673|ens|ENSMUST00000179314	chr3:113052173-113052114	mm|3qF3	GO:0004556(alpha-amylase activity)|GO:0005615(extracellular space)|GO:0016160(amylase activity)|GO:0070062(extracellular vesicular exosome)	GCTGAGGACCCATTTATTGCAATCCATGCTGACTCAAAATTGTAAGAATCTATATTAAAG	280	AMY2B	0
A_51_P114634	Amz1	archaelysin family metallopeptidase 1	Mus musculus archaelysin family metallopeptidase 1 (Amz1), mRNA [NM_173405]	NM_173405	NM_173405	231842	chr5	141229165	141229224	+	245	192	167	A_51_P114634	FALSE	Mm.491298	ENSMUST00000060918		ref|NM_173405|ens|ENSMUST00000060918|ens|ENSMUST00000176035|gb|BC050186	chr5:141229165-141229224	mm|5qG2	GO:0003674(molecular_function)|GO:0005575(cellular_component)|GO:0006508(proteolysis)|GO:0008150(biological_process)|GO:0008233(peptidase activity)|GO:0008234(cysteine-type peptidase activity)|GO:0008237(metallopeptidase activity)|GO:0016787(hydrolase activity)|GO:0046872(metal ion binding)	TCTTTTGTCTTTGATGACATTTTTCCTGTCTCTGGCTATATCAATTCCTGACATAGGATG	155185	AMZ1	0
A_51_P179504	Ang3	angiogenin, ribonuclease A family, member 3	Mus musculus angiogenin, ribonuclease A family, member 3 (Ang3), mRNA [NM_001123394]	NM_001123394	NM_001123394	11730	chr14	44540232	44540291	+	28063	107	291	A_51_P179504	FALSE	Mm.24663	ENSMUST00000096869		ref|NM_001123394|ref|NM_001011876|ens|ENSMUST00000096869|ref|XM_006519348	chr14:044540232-044540291	mm|14qC1	GO:0001525(angiogenesis)|GO:0003676(nucleic acid binding)|GO:0003677(DNA binding)|GO:0004518(nuclease activity)|GO:0004519(endonuclease activity)|GO:0004540(ribonuclease activity)|GO:0005575(cellular_component)|GO:0005576(extracellular region)|GO:0005578(proteinaceous extracellular matrix)|GO:0005604(basement membrane)|GO:0005634(nucleus)|GO:0007275(multicellular organismal development)|GO:001678…	GTACATAAAATTCCTGACTCAGCACTATGATGCCAAGCCAACTGGCCGGGATTACAGATA			0
A_55_P2158227	Angpt1	angiopoietin 1	Mus musculus angiopoietin 1 (Angpt1), transcript variant 1, mRNA [NM_009640]	NM_009640	NM_009640	11600	chr15	42256394	42256335	-	62398	2	174	A_55_P2158227	FALSE	Mm.309336	ENSMUST00000022921		ref|NM_009640|ref|NM_001286062|ens|ENSMUST00000022921|ref|XM_006520323	chr15:042256394-042256335	mm|15qB3.1	GO:0001525(angiogenesis)|GO:0001541(ovarian follicle development)|GO:0001569(patterning of blood vessels)|GO:0001570(vasculogenesis)|GO:0001701(in utero embryonic development)|GO:0001933(negative regulation of protein phosphorylation)|GO:0002040(sprouting angiogenesis)|GO:0002092(positive regulation of receptor internalization)|GO:0002740(negative regulation of cytokine secretion involved in immu…	CATGTGTGTAGCAATTTGATACGCATAGCTTTTTGCATTTAATTAATGCAGGGCAGAAAA	284	ANGPT1	0
A_52_P853177	Angptl2	angiopoietin-like 2	Mus musculus angiopoietin-like 2 (Angptl2), mRNA [NM_011923]	NM_011923	NM_011923	26360	chr2	33102102	33102159	+	61025	6	296	A_52_P853177	FALSE	Mm.208919	ENSMUST00000004208		ref|NM_011923|ens|ENSMUST00000004208|ref|XM_006498051|gb|AK155464	chr2:033102102-033102159	mm|2qB	GO:0005576(extracellular region)|GO:0070062(extracellular vesicular exosome)	TGTATGCTCTTAGACAGCACATCACACGTGGGATGTCGAGATACACATATGGGTTTCCAA	23452	ANGPTL2	0
A_51_P259571	Angptl6	angiopoietin-like 6	Mus musculus angiopoietin-like 6 (Angptl6), mRNA [NM_145154]	NM_145154	NM_145154	70726	chr9	20678385	20678326	-	42389	63	176	A_51_P259571	FALSE	Mm.34019	ENSMUST00000043726		ref|NM_145154|ens|ENSMUST00000043726|ref|XM_011242599|ref|XM_011242600	chr9:020678385-020678326	mm|9qA3	GO:0001525(angiogenesis)|GO:0005576(extracellular region)|GO:0007275(multicellular organismal development)|GO:0030141(secretory granule)|GO:0030154(cell differentiation)|GO:0070062(extracellular vesicular exosome)	CGTGGTGGGGCGTACTCTCTGAAGAAAGCTGTTATGTTGACCCGGCTTGTGCGCTTGTGA	83854	ANGPTL6	0
A_55_P2073572	Ankef1	ankyrin repeat and EF-hand domain containing 1	Mus musculus ankyrin repeat and EF-hand domain containing 1 (Ankef1), mRNA [NM_175667]	NM_175667	NM_175667	319196	chr2	136381507	136381566	+	48374	45	14	A_55_P2073572	FALSE	Mm.477841	ENSMUST00000138967		ref|NM_175667|ens|ENSMUST00000138967|ens|ENSMUST00000121717|ens|ENSMUST00000028726	chr2:136381507-136381566	mm|2qF3	GO:0003674(molecular_function)|GO:0005575(cellular_component)|GO:0008150(biological_process)	TTTCCAAAAGAACATCACGGAGAAAGCTCAGGCACTGGAGGCAACACTCAAGAACTAAGT	63926	ANKEF1	0
A_55_P2121516	Ankfn1	ankyrin-repeat and fibronectin type III domain containing 1	Mus musculus ankyrin-repeat and fibronectin type III domain containing 1 (Ankfn1), mRNA [NM_001080933]	NM_001080933	NM_001080933	382543	chr11	89282459	89282400	-	39932	71	169	A_55_P2121516	FALSE	Mm.173249	ENSMUST00000169201		ref|NM_001080933|ens|ENSMUST00000169201|ref|XM_006533652|ref|XM_006536458	chr11:089282459-089282400	mm|11qC	GO:0003674(molecular_function)|GO:0005575(cellular_component)|GO:0008150(biological_process)	GGGTTTCTTAACCTCCCTCTTCAGATGTTTGAACTCGGTATAGTAGCTTGTTTCACCTAG			0
A_51_P158545	Ankk1	ankyrin repeat and kinase domain containing 1	Mus musculus ankyrin repeat and kinase domain containing 1 (Ankk1), mRNA [NM_172922]	NM_172922	NM_172922	244859	chr9	49223418	49223359	-	61199	6	275	A_51_P158545	FALSE	Mm.119994	ENSMUST00000034792		ref|NM_172922|ens|ENSMUST00000034792|gb|AK036872|tc|TC1591179	chr9:049223418-049223359	mm|9qA5.3	GO:0000166(nucleotide binding)|GO:0004672(protein kinase activity)|GO:0004674(protein serine/threonine kinase activity)|GO:0005524(ATP binding)|GO:0005575(cellular_component)|GO:0006468(protein phosphorylation)|GO:0016301(kinase activity)|GO:0016310(phosphorylation)|GO:0016740(transferase activity)|GO:0016772(transferase activity, transferring phosphorus-containing groups)	TGTCCCAGATAAGCTTCATCTCTAGTCTCAAGACGTCTGCCACCATTTGTTGCTTTCCTT	255239	ANKK1	0
A_55_P2030721	Ankle1	ankyrin repeat and LEM domain containing 1	Mus musculus ankyrin repeat and LEM domain containing 1 (Ankle1), mRNA [NM_172756]	NM_172756	NM_172756	234396	chr8	73933323	73933382	+	4963	177	244	A_55_P2030721	FALSE	Mm.216549	ENSMUST00000125290		ref|NM_172756|ens|ENSMUST00000125290|ref|XM_011242300|ref|XM_006509661	chr8:073933323-073933382	mm|8qB3.3	GO:0003674(molecular_function)|GO:0005575(cellular_component)|GO:0008150(biological_process)	TGAGCCATCAAGGTGTCTGAGCATCTGGCTGGTTCCTAACTGTTCCCAGCTCTAGCTTCA	126549	ANKLE1	0
A_55_P2085412	Ankle1	ankyrin repeat and LEM domain containing 1	Mus musculus ankyrin repeat and LEM domain containing 1 (Ankle1), mRNA [NM_172756]	NM_172756	NM_172756	234396	chr8	73933743	73933802	+	56950	19	245	A_55_P2085412	FALSE	Mm.216549			ref|NM_172756|ref|XM_011242300|ref|XM_006509661|ref|XM_006509662	chr8:073933743-073933802	mm|8qB3.3	GO:0003674(molecular_function)|GO:0005575(cellular_component)|GO:0008150(biological_process)	GAAACCATGTCCCCCAAAACAAACCAAAAAACAACAACAAAGCCAAGATGGTACTCTGGA	126549	ANKLE1	0
A_51_P499530	Ankrd10	ankyrin repeat domain 10	Mus musculus ankyrin repeat domain 10 (Ankrd10), transcript variant 1, mRNA [NM_133971]	NM_133971	NM_133971	102334	chr8	11612240	11612181	-	35255	85	12	A_51_P499530	FALSE	Mm.12459	ENSMUST00000033905		ref|NM_133971|ref|NM_001281975|ref|NM_001281974|ens|ENSMUST00000033905	chr8:011612240-011612181	mm|8qA1.1	GO:0003674(molecular_function)|GO:0005575(cellular_component)|GO:0060828(regulation of canonical Wnt receptor signaling pathway)	ATTGTATTTGATCAGGACAGTTGGGCATCGCTCACCTTTACTGTTTGCTGTAGCACTCCT	55608	ANKRD10	0
A_55_P2170978	Ankrd13d	ankyrin repeat domain 13 family, member D	Mus musculus ankyrin repeat domain 13 family, member D (Ankrd13d), mRNA [NM_026720]	NM_026720	NM_026720	68423	chr19	4270277	4270218	-	48181	46	71	A_55_P2170978	FALSE	Mm.23642	ENSMUST00000163858		ref|NM_026720|ens|ENSMUST00000163858|ens|ENSMUST00000056888|gb|AK089186	chr19:004270277-004270218	mm|19qA	GO:0003674(molecular_function)|GO:0005575(cellular_component)|GO:0005768(endosome)|GO:0005886(plasma membrane)|GO:0008150(biological_process)|GO:0016020(membrane)	ATTTATTTATAAACTGTCTGCTGCTGAGCTTGGGACCTGGGCACTGAAGATAGGCTAGCA	338692	ANKRD13D	0
A_55_P2134690	Ankrd26	ankyrin repeat domain 26	Mus musculus ankyrin repeat domain 26 (Ankrd26), mRNA [NM_001081112]	NM_001081112	NM_001081112	232339	chr6	118452649	118452590	-	53341	30	247	A_55_P2134690	FALSE	Mm.276116			ref|NM_001081112|tc|TC1629570|nap|NAP104418-1	chr6:118452649-118452590	mm|6qF1	GO:0005515(protein binding)|GO:0005813(centrosome)|GO:0005884(actin filament)|GO:0019216(regulation of lipid metabolic process)|GO:0019217(regulation of fatty acid metabolic process)|GO:0040015(negative regulation of multicellular organism growth)|GO:0042593(glucose homeostasis)|GO:0045599(negative regulation of fat cell differentiation)|GO:0046621(negative regulation of organ growth)|GO:0046627(…	CTGGTGTCCTCTTTTGATGTGCAGGATTATGTGCAAATAGAACACTCATATTCATAAAAT	91074	ANKRD30A	0
A_55_P2103501	Ankrd29	ankyrin repeat domain 29	Mus musculus ankyrin repeat domain 29 (Ankrd29), mRNA [NM_001190371]	NM_001190371	NM_001190371	225187	chr18	12413150	12413091	-	29356	103	2	A_55_P2103501	FALSE	Mm.53865	ENSMUST00000137948		ref|NM_001190371|ens|ENSMUST00000137948|gb|AK090336|gb|AK162301	chr18:012413150-012413091	mm|18qA1	GO:0003674(molecular_function)|GO:0005575(cellular_component)|GO:0008150(biological_process)	AAAGAAGGACCTGGGAAGAATGAACTTGGATCCATCTTAGATAGATAGGAATTTAGGCCA	147463	ANKRD29	0
A_55_P1958921	Ankrd29	ankyrin repeat domain 29	Mus musculus ankyrin repeat domain 29 (Ankrd29), mRNA [NM_001190371]	NM_001190371	NM_001190371	225187	chr18	12410956	12410897	-	15949	144	247	A_55_P1958921	FALSE	Mm.53865	ENSMUST00000137948		ref|NM_001190371|ens|ENSMUST00000137948|gb|AK162301|ens|ENSMUST00000118525	chr18:012410956-012410897	mm|18qA1	GO:0003674(molecular_function)|GO:0005575(cellular_component)|GO:0008150(biological_process)	CTGAACTACAAAAGTTTGCTACTACATCCATCTGTTTGACAACACATTCCATGTTATACT	147463	ANKRD29	0
A_52_P217675	Ankrd32	ankyrin repeat domain 32	Mus musculus ankyrin repeat domain 32 (Ankrd32), mRNA [NM_134071]	NM_134071	NM_134071	105377	chr13	77265872	77265653	-	59147	12	116	A_52_P217675	FALSE	Mm.209730	ENSMUST00000159300		ref|NM_134071|ens|ENSMUST00000159300|ens|ENSMUST00000162921|ens|ENSMUST00000162320	unmapped		GO:0005515(protein binding)|GO:0005634(nucleus)|GO:0005813(centrosome)	TTAAGAGTGAGAAATATAAAAACTGTACACATCTTATAGCTGAACGACTGTGCAAGAGTG	84250	SLF1	0
A_51_P207412	Ankrd32	ankyrin repeat domain 32	Mus musculus ankyrin repeat domain 32 (Ankrd32), mRNA [NM_134071]	NM_134071	NM_134071	105377	chr13	77182494	77182435	-	38721	74	296	A_51_P207412	FALSE	Mm.209730	ENSMUST00000151524		ref|NM_134071|ens|ENSMUST00000151524|ref|XM_011244454|ref|XM_011244453	chr13:077182494-077182435	mm|13qC1	GO:0005515(protein binding)|GO:0005634(nucleus)|GO:0005813(centrosome)	TCTGAGTGCTACAGGTCTGAAAATCATGGCAAGGATATTCATTCAAATGTGCATCTATAT	84250	SLF1	0
A_51_P406466	Ankrd35	ankyrin repeat domain 35	Mus musculus ankyrin repeat domain 35 (Ankrd35), mRNA [NM_001081139]	NM_001081139	NM_001081139	213121	chr3	96494165	96494224	+	57809	16	168	A_51_P406466	FALSE	Mm.39732	ENSMUST00000048427		ref|NM_001081139|ens|ENSMUST00000048427|ref|XM_011240062|ref|XM_006501256	chr3:096494165-096494224	mm|3qF2.1	GO:0003674(molecular_function)|GO:0005575(cellular_component)|GO:0008150(biological_process)	GCAGGAGTGAGGCAGGCTCACTGTGTGCCCTCAGGGATAAAGGCATTTCTCTTTTGTGAG	148741	ANKRD35	0
[truncated: 6,594 more rows]

## Sheet: 3_Group A
Sheet 3: Probe list for gene group A
Total	2602
Unique Gene symbol	2049
NAME	GENE_SYMBOL	GENE_NAME	DESCRIPTION	REFSEQ	GB_ACC	LOCUSLINK_ID	chrom	chromStart	chromEnd	strand	ID	COL	ROW	SPOT_ID	CONTROL_TYPE	UNIGENE_ID	ENSEMBL_ID	TIGR_ID	ACCESSION_STRING	CHROMOSOMAL_LOCATION	CYTOBAND	GO_ID	SEQUENCE	EntrezGene ID_Human	HGNC symbol_Human	Selection
[truncated: 2,602 more rows]

## Sheet: 4_Group B
Sheet 4: Probe list for gene group B
Total	4413
Unique Gene symbol	3713
[truncated: 4,414 more rows]

## Sheet: 5 Group C
Sheet 5: Probe list for gene group C
Total	207
Unique Gene symbol	195
[truncated: 208 more rows]

## Sheet: 6_Group A_GO
Sheet 6: Gene ontolgoy analysis for group A genes
* GO terms and results selected in Supplementary Fig. S2B are highlighed by red color
[truncated: 2,050 more rows]

## Sheet: 7_Group B_GO
Sheet 7: Gene ontolgoy analysis for group B genes
[truncated: 3,715 more rows]

[truncated: 1 more sheets: 8_Group C_GO]
